# Supplementary material for: Comparative Genomic Analysis Reveals a Possible Novel Non-Tuberculous Mycobacterium Species with High Pathogenic Potential
Source: PubMed Central journal article supplement (PMC4818103; doi:10.1371/journal.pone.0150413), 2016-04-01
Supplement: pone.0150413.s006.pdf [file pone.0150413.s006.pdf]

**Supplementary Table S2: Full list of predicted GIs in UM\_CSW genome.**

| Genomic islands | Genomic size (bp) | GC content (%) | Contig number | Start | End   | Gene description                          | Gene-sequences                                                                                                                                                                                                                                                                                                                                                                          |
|-----------------|-------------------|----------------|---------------|-------|-------|-------------------------------------------|-----------------------------------------------------------------------------------------------------------------------------------------------------------------------------------------------------------------------------------------------------------------------------------------------------------------------------------------------------------------------------------------|
| GI1             | 11040             | 62.3           | Contig 2      | 63446 | 74485 | hypothetical protein                      | MTQTERLPAYTEAHPPTPSSDELRAQIPGWGADLDPKDRP<br>SNPKLRQDLPTETHWDFPERQPEKWPRERSVEHRFLTPVF<br>GTAQPPSGVSGMLRRYAYKFSEGRAAHWLILLYADRVDTA<br>EHHVRSFLTTRPDNPITETGIKSELTHHGIQSRLGRKRSDLVH<br>IWMDFIVAGPWILGGQGIASLARKAVKAVGNNGGRGGG<br>R                                                                                                                                                          |
|                 |                   |                |               |       |       | low molecular weight T-cell antigen TB8.4 | MTGADGAVSTNPEPQPDQDWIVNTKCSFPQFVAALNAED<br>IRAAQQFAITPAAQSWVGSYLASSPDQRRQMLRRAQSIPD<br>ARQYIDTMLRVASTCKNF                                                                                                                                                                                                                                                                               |
|                 |                   |                |               |       |       | hypothetical protein                      | MRYEEFISSVAERSGLFQGDAVALTRATLTTLAERISGGEAR<br>DLAAQLPSPLQDALLPTEEEAEAFSDFEFVNRVAERSGRDTE<br>AAEA AVDAVLATIRDAVTPGEFDDVLSQLPSEFQRLGTR                                                                                                                                                                                                                                                    |
|                 |                   |                |               |       |       | protein of unknown function UPF0118       | MGPPGRRFDWHSPFFVGLTASAGVAVTYGAVRGLAAVSS<br>VLLIGVAFFIALGLEPAVSWLVGKKVPRWAAVAVVLFVAVIA<br>VVAGSLAAAIPPLVQQAREFTDQAPHYIQHIGDHSSWIGRL<br>NDRFHLQQRITETVHGSGGAVVGQALKAGEAVFGAVADV<br>VVVVVLTVYFLVDFPRIRATLYRFVPHSRRPRAILIGDQMFA<br>KVSAYVFGNIVISAIAGVATFVWLVIQVYPLLLGIFVALLDL<br>IPFGSSVAGVIVAVALTVSIPVAIATLLFYTLFRFVEDYLLVPK<br>IIGRAVNVPAVATLLAVLVGGALLGIVGALVAIPIAAAIQLAA<br>RELLFPTLDKL |

hypothetical protein

MVVIGHIADPEEPRHGRRGKAVQSTIARLAAAMVGTAGIE  
DALSKLTSASLALIPGADCAKISTIENGLRSITATSQLTSSLDS  
AQQAAGQGPCLETISAKKAIRCDDLRTDTRWPRFTPRATTA  
GVYSVLSTPIDIPGETGATLTLFGFRAEAFGPDAEAVGAMLA  
NHAAIALMHVKQERQFKAALATRNVIGQAKGMIMERFGID  
AARAFAMLRAISQQTNTPLRELATRLVDGAKR

hypothetical protein

MQRLRAGTSIIYASGSLDGETRAVLCRAVADELTTQGSAQLV  
LELSSATSIDDTAVEALVDATGLAAESDTSICLVTSPTGPIARA  
LAAADLLERFEIFATVDEAQRHP

hypothetical protein

MGIAHRAEPPSLHSVFNLSPLLFDGRRADAVLELAAEAVRSL  
GKCSSEGAYRVVDGSLVDNSDPDRPLDSGLDAAVTASVGV  
DHEIVLPDSNWRYAMTLRRTNTVTGVLVVRADNPASCHEL  
VLLKMLAQQAAATAMASADTIERERRQHVLRELTDREHEETI  
HRLSRVAELERREHIIHKALTNLSGSADAASIADALHDLTSLT  
VSVEDTFGNLRAWSPAPIPTAYRAVGGGNREDVIRNAGSR  
GHHSDCGNRIFSLIRARAELLGVVVLHDPQRRADRLDIFALE  
YAAAVLAVEFSHQRSIAETESRLSRDLVDDLLTGTDNATAYA  
RGEALGYNLHRPHRVTVLQWSAEIDGALIARSATRWATSA  
GLHPLCARRPSMTILLTEDLPQPQSLYRAISAAVGHGRGWI  
AIGSVATSPSELPRSFARRTLRLMQKASVGRHGFRRFDDL  
GVCRILDPSDNGPEVGEFLAEWLGPLMAYDQEKNAELVNT  
LARYLDSSGGNYDQTARALNIHRSTLRYRLGRIRDVSGRDLQ  
NVETRLNLHLATKVSEMIGETQPIMRAASTGERRPSDEGM  
PK

|                                                 |                                                                                                                                                                                                                                                                                                                                                                            |
|-------------------------------------------------|----------------------------------------------------------------------------------------------------------------------------------------------------------------------------------------------------------------------------------------------------------------------------------------------------------------------------------------------------------------------------|
| putative transcriptional regulator, AraC family | MTELPFDLAPEVRTTDIDEAASALGRVYVTAELVPNKNSV<br>GMHMNAAQLPLITAGYLGFGADVTVRANDVTAYYIDAPLS<br>GSAVNRWRDGELVKTTTGSVAVFTPGTPCVLDWSGDCGQI<br>CLKVSEPMRRQLEAMLNRPVRKRITFARQFDLSTTAAHD<br>WYHLVSLAREVGRDGLLNHRLAAANLQLLIQGLLIQIP<br>HNYTEALAESEGAASANVAKRAIDLLHAHPETMWSTAQLA<br>RQTGVSARALQRAFERSDQSPMAYLRRRLRHRVYTELAAS<br>SPDSVTVMVAGRWGFVHLGRFAGQYQQLFGETPAETLR<br>HRVADALPTQPQPPL |
| hypothetical protein                            | MFISDRTPQEPDMTTADEDSERDFLAKCVADAYQMLEIIP<br>GVNPNGAALVWLADQFMQVRRRTESHLASTA                                                                                                                                                                                                                                                                                                |
| hypothetical protein                            | MKRPNSRFLLAISRTGWLGRTEILLRGLLASDTGTVKVSMP<br>WSI                                                                                                                                                                                                                                                                                                                           |
| hypothetical protein                            | MWSEYYDVATECAVTLRMLLASMSNVTSIWGSPRGIGRM<br>LPNFETAQ                                                                                                                                                                                                                                                                                                                        |
| ThiJ/Pfpl family protein                        | MPNMLQGKTIAILAADGVERVELVHPSAAVHRAGGQTELL<br>SLRNGWIQMRNNDLPAGTFTVDRAVAGASIDYGGLLLP<br>GGTVNPDKLRTDERAVAFVRGFVESGKPVGVICRGPLTIEA<br>GVVAGRTLTSYPSVRTDLRNAGANVVDEEVVVDGNLISSRS<br>PDDLPAFCVAIVKAFKTPAGTS                                                                                                                                                                     |
| hypothetical protein                            | MAQDTENQHHTGTGTGTENQGTENDSAGSQAPGGNPD<br>NRETVQNMDAPELRTAVIELLTIIDDSDEMDDVVVTISDDGT<br>VVVEAA                                                                                                                                                                                                                                                                              |
| ThiJ/Pfpl family protein                        | MTHELRGQRVGI LAADGVERIELEQPRGALHGAGAMTEVI<br>SLHPGEIQARQFDMEPAGSFPVDRLVGDVSADDYDALLMP<br>GGTVNPDKL RMNADAVAFVKAFADTGKPIAVICHGPWTLA<br>EADV IQGVRMTSWPSIRTDLRRAGADVDEEVVVD RQFISS<br>RSPNDLPAFCGAI VVQFAKAKQP V                                                                                                                                                             |

hypothetical protein

MATKALLVRLEAKPGKEDAVEKFLLSALPLVEQEPGTKPWF  
AVRFSPSIFGIIDAFPDEAALEAHLGGAVGKALAEKADELAFAS  
PPDISKLDVLANKL

---

GI2

14745

61.7

Contig 17

84910

99654

hypothetical protein

MPGITRSSAHSTSSIAERLTLRPDTRTASRNTDGAADAGRP  
RVPEAGKAAGRESGSGRSDGGSGVDRVPAGTNGLVICAKS  
VRDTVGDIVDAELSASDALGLRFPNPMVASAAALFEPAP  
WAHGRDRLDVEPECGRFRITIGPGVRLGWTNPVRAEKAS  
ERTVGQHMVDVAGEVDRIKAGRDVPDPSGRAITEWSRKS  
RAAMCRTFAELDYTPMVESGRVPAMVTLTYPGDWESVAP  
DGASVKRHMMLWRKRFQREWGEPARYIWKMEFQRRGA  
PHIHLWMAPPYTVGRSGRRFSEWLSQEWAEVVAHPDPEQ  
RTRHLRAGTAIDSLNGLRACDPKRLAIYFTKHSSPNRLGDKE  
YQHIVPEAWRRPGRGPRFWGVHGLERATAVVEIAQDAY  
LTARRIIRWRSQAIHSDCTHCFPTALVPRMTRVAVQRTN  
SKTGKVRHRNVCRRLLCRQGGFAGGYALVNDGPAFASQL  
AAALSADRAKAVRDEQLAGRK

hypothetical protein

MHRQPQLLNDCVHLTSLFSVGKSEFIKLPTIFMILQPQE

Transcriptional regulator,  
TetR family

MREVPRKIADRLPPAAALFADRGLNDTKIEDVAATTGIKAT  
LYYYFAGKEEILAFLEEDVLQQAHEVAAVVEAEGSAAQLH  
AVISAQLRVMAQRPAVCRALIGELGRAARMPVIADMISAAY  
FAPVETLLRAGAGDGSVTLDNPAVAIAALFGAVTTSALTYL  
VLDDALDEDRIARTIHDLVFVGLRPR

putative cytochrome  
P450 hydroxylase

MTTVQLRYDPFDATIQDDLYPIYRQLRDKAPLYRAADSNTW  
VFSRHEDVVSALLDHHTYSSVDGIFPTPPGSDFHASFLPMMI  
LMDPPRHDQLRALVSKAFTPRRIAALSSGIEDLAEDLSDCLD  
RGAGSVDFAAVFAAVLPAMVIADLLGIPREDRAQFRQWST  
TMVQSNPARGEMGEGLAATAAVYAYFTDFAERRREPRG  
DLMSALVSAEIDGKRLTDEDLLGFCLLLLIAGHETTSNLLSNA  
AVVLASDPDIRRRLVADDNLLGPAVEELLRYDSPVQGLSRTL  
TRDVTLHGVTMSVGDSVLLFGSANRDERVFADPDVFDIGR  
KPEHQVAFGRGIHFCLGASLARMEARIALRALLARVPNWEV  
DLENAQRLRSGLIRGYMSLPISWSAN

Transcriptional regulator,  
TetR family

MERDGFDMPVDDDVPRLVRSRTRLLDAATKLLSAGGIEA  
VTIDAVTKASKVARTTLYRHFSSTQLLAATFERLLPQVHLPP  
ATGSLRDQLIELSRQATLFQEAPLHVTTLAWVALGPTSNT  
QETYDRHALRTRIIIEYRQPFDLLLQSPACADLDEFDPIL  
CQLVGPVAFARLTGLRAIDRQDCERIVDDFLAAHRRKVDEP  
AS

hypothetical protein

MADNGWVSSGVATLSRPVREQLRKVAAGEGAYSDRLARL  
AGFSIRHKVLVIGAWVVTAGVLA MLFPQLETVVKQQSVNL  
VPPDAPSLQTVDRMGTA FGEQGSKTTVFVAFEDPTGLTAP  
VRQRYKTMVSRLRADSQHVR LVQDLLADPVTAGQAMSQD  
GKAWYVPVGVAGTLGDPRAAESVR AIVAEFSFGTSTIV  
RVTGPPATFSDLIDSAEQDLIGISIVTAGLIAVILLVIYRSLVTAL  
LPLL VIGVSLAVGRGVLSALGESGMPVSQFTIAFM TAILLGA  
GTDYSVFLISRYHEQRRQMISADLAVINATATIGRVIMASAA  
TVAF AFLSLVFAKLSVFSALGPACAI AVFVGVAATVTLFPPVL  
ALAAKHGIGEPKADRTRRYWNWIAVAVVRRPAPLLAASLAL  
VLGLAAVALTMHISYDDRQGPATTTSN EGYRLLDRHFRKD  
IVITQFMVVESPTDMRTSKGLADLDEMASRVSQ LPGVTKVS  
GVTRPTGARLDQAQLSWQNGQIGNK MAGAVAKGDAHKD  
DLAKLTSGADQLAGGLAQLD TTLRTALPLTAVLTQAQSSG  
SQFQHFRPLLQQLSATTPTIDQAIR TGPGLRQEAQQAQNAI  
ATIDPLVGALNTSPWCATTPECAQIRDQVQ ILVTLRDGGFFS  
QLANLGDMYQPGSDNAAGTVADLQSTV TSLNKAFGALGD  
PADMAGNIRRLQNGISQLASGAQALATGVHTLAD SNIEML  
SGMSQVATQLQNSARSSAGSDNASGFYLPANTF ENRQFAD  
VAKHFMSADGKTARFAIESSYNPYSSQAMDLAQ KITEVAGA  
ARPNTSLANATISMAGFP AVNSDIQRLLSADFHLLAIATLVIV  
GVILVLLLRALLAPLYLLGT VVLNYGAALGIGTLVFQYGLGKEI  
AWPVPLVAFIILVAVGADYNM LLI SRLREESAHNIRVGV LRT  
VANTGSVITSAGLIFAASMFGLM VGSVGIMIQVGFIVGCGLL  
LDTFVVRTLTVP AIATLLREASWWPQRKSSTHNGRPHRTT

Hydrolase

MADCYRHAATHPVVLLHGGGQNRHAWATTARRLYSHGY  
TVVAYDTRGHGSDWDPSGQYDIERFVSDLISVRGHVSAD  
SPPAVVGASLGGILLATHLLAPPDLWAAVVLVDITPRMEFH  
GARRILSFMAGHPDGFGLNDAADVIAEYNPRRARPENLD  
GLHKVLRQRSRGRWIWRWDPAFISSNFDVLQGNLMTGSE  
EFDAISGFLAEGARRITAPTLVLRGALSDVVSQETVSEFRQLV  
RHAETDVTGTGHMVAGDNDAFTA AVTDFLDRAMRTL

FIG00825226:  
hypothetical protein

MGLTDASKGAVMHTQWIEQCTVQRVSLHEGLILDLDGYNE  
LVISRPLRLTLPAGAWPSDEVLIDPINLSPEERPLDLAGAIC  
TRAWCDDDGALHLCFSPGHRIDVDPDVAATSWELYGKCH  
GYVACLPRGRVRAIRHDLDPVDENDSDATQPKAMAHQ

hypothetical protein

MAITIPSGRPNWRFMRYVRPPTRDSKLEPLYPLRPATRPVR  
LGIDVGTIAEPPEEGYITGFLTRDEIEVHLLIPAATEAPSGWTE  
LLEPPCHTVNFTNVADAGKFCDAAEFSVSTARGESYRAWS  
KARFFAAYQQLDEHDAPDGLPPLTLDQRHRAAAYAAAAGA  
VGIDAIVTTAPTAGRTDVADNDVVSVTPDAAVPLIGHYLR  
VTSNPVVTVERGMLVGGGSWETTESTATIVNLYDWGTVSG  
LPYFDAASMFAAAAKGGPEAAEAFTSVRIRLRAARAFDDL  
LAALSNPLDGKRNEAEATAEAFDRELLYLAAVFDIFGRAY  
QAMVDPSVDRKKARGSLDSRTFIDKEVRTQYDQSLLGDVT  
RLRVYAWLCKQLRNHIHDGVLAVDTHPGRSYGNTMNVAL  
NLSVIPELALGADNEMTQHHDALGVWQTEPVSPFTGSSM  
VADLATTGFTLIRAALEYIEAFTKLIVRNKPANAPSSSAFLGCV  
QARPGEVAPPKRAVFYQALFGLHPDSV

hypothetical protein

MAAVDQSDNPMGQVLVNAGETFYLRQSGFLKDFAPNTV  
LKRFA

Transcriptional regulator  
KorSA, GntR family

MLQLGQIDRADDKPPYRQIAGMLREAIRSNRLAPGERLPSE  
TELIEHFGVARM TVRQAVQELRSEGLVVSQHGRGVFIRPTP  
PIRRLASDRFARQHRAAGKAAFTVEAEKSGYSPQVDNIAVS  
REKPNSFVAERLRLSPDDDDIVVRSRRYLANGRPVETAVSFIPA  
AFAEGTRIEQVDTGPGGIYARLEENGHV LGHFTEEVAARMP  
TPEERRQLELEPGVPVLT VLR TAYDANDVAVEVCDTVKVAS  
AYLLEYEFPAR

FIG00831412:  
hypothetical protein

MSVPKWLKVSHQQVFPRKAFVVS DVTAVIDYERSTKDNKV  
QATDRESGAPLWQVEVLDGDPTASKRARTLTVKFATPKQP  
VCPNTAGMPFTPVIFEELYILPYVDRSSESGRIAWSFRASG  
MTADTGKAGSSAGDRVSA

Transfer protein traSA

MSPYDPVVPSPYSIPDPDAGIDFFDLTHLLAVGAMWLI AV  
IGVVAVSLVVWRVRS PATFGRYVATPACRARWLIWASISW  
PRVAKACGLSTPEHVTRTDAQQKSRTRTVWTHPRLLGVSM  
FGDCLRMTVRTRTGQTVDDLENAVPAIRDAVGAHSARSTLI  
GPGTVRVEFVMKQCLSEAETA AFPTSVEPTGVEVGRRENGS  
AWTLRVAGLHTLVGCSGAGKGSVFWGIAGGLGPAIKAGT  
VRLFVLDLKYGIEVSVGSALFSGIATTEANAARLLTNLEELDS  
RGRRMAGRARSHTPSTAEPLVLLIDEFAGLTAYMTDAALR  
KQVAGLSRILTKGRAVGIVVA AFMQDPRKEILPMRGLFTQ  
TVALRLRSRDEVAMVLGDGLADAAPHRINPNEPGTGYVIA  
EDGSTMRVRADFWPDSLIR SVAQEYGPTSSSRAGSAEN

---



|     |       |      |           |       |       |                                               |                                                                                                                                                                                                                                                                                                                                                                                                                                                     |
|-----|-------|------|-----------|-------|-------|-----------------------------------------------|-----------------------------------------------------------------------------------------------------------------------------------------------------------------------------------------------------------------------------------------------------------------------------------------------------------------------------------------------------------------------------------------------------------------------------------------------------|
| GI3 | 10251 | 62.8 | Contig 22 | 38227 | 48477 | Coenzyme F420-<br>dependent<br>oxidoreductase | MAKLSVATPVVMLPAANGSWEKDASIEDLAQIAEAADRLG<br>YHHLTCAEHIGLPAAERERRGTRYWDPLATFGYLAARTQRI<br>RLTTYVLVLGYHHPLEIAKRYGTLDKVSNGRLILGVGVGSLKE<br>EFELLGASFDDRGARGDDALRALRASLSVPEPTYHGEFYFS<br>GMVVDPCAVQDRVPIWIGGRTLRLSLRAVTLADGWAPFN<br>VSPQQAREWLGRFDIQPGFEVLLPPLAPLNPIDEPDRTRHII<br>ADTVAHGATIVSTMFRHRSLQNYLENLHALAEIYPPDGGAA                                                                                                                             |
|     |       |      |           |       |       | hypothetical protein                          | MNRVKAGVFSLTPPAPADDDGSYLRWHLLDHMPEQYQLP<br>GIVHGLRWIADGDYADHRLAANGPLSQIGNAVHYLVSDPV<br>EETLDDFVALGSALRENGRFPISRPYLQVAGLRLLQWHSAP<br>QALISGEVVPFRPHRGILLIVEEPADGRSNEWLQWLHAEHY<br>PALLATPGTVGAWTFGTSTGWIHLPAWRTDQQYITVVYL<br>DADPLATTDAVAALVEDRWRSAAVRPVFAGPLRTMISWD<br>AWPTS                                                                                                                                                                        |
|     |       |      |           |       |       | Transcriptional regulator,<br>TetR family     | MTDQEPRLRQRTDGRLNRSRDPAILNAALAALAEHGYPAT<br>NMDDIAARAGVGKAAIYRRWSSKAALMTDALVYWRPDL<br>SADVPDTGSLAGDLALVERIKRSDSLSNDLVLRVAMEA<br>AHEPELASALDDLMLGKGRMTAILTHAAKRGEISGDRD<br>WSLVADVLVAMGLLQVARGQTVDANFVRQVIDTLVLPV<br>RTTNA                                                                                                                                                                                                                           |
|     |       |      |           |       |       | putative cytochrome<br>P450 hydroxylase       | MDPAMFFGTDAIQNPYPLYEQMRAASPVHRIGDSDFYAVC<br>GWDVVEAVARVDDFSSNLATVVFEGDTGSVEPYSMMP<br>LGDPMHSLATADDPHAVHRKILLPHLSAKRVRVIEEFAQE<br>TARRLLSESLVDGRIEWMSTVANRLPMMVVARLLGLPHDD<br>VDTLIRLGFATTTLLDGLVTPAQLEAAGTAVMELSAYVLDHF<br>DKAATDAQPGLMSDLAARCASGQLDQPVALSMMLTLFSA<br>AGESTASLLGSAAWILVSRPDIQEQVRAHPDLLGPFIEETLRY<br>EPPFRAHYRHVRRHTALAGVELPADAHLLLMWGAANRDA<br>AQFESPDEFRLDRGGAKGHVTFGKGAHFCIGAALARLEARV<br>VLGILLERTDWIEAAEIGEWLPSILVRRRLERLHLATR |

Transcriptional regulator,  
TetR family      MAGVDWLVGQDRGSEATARIHAAAADLVSERGWEGFTIG  
ALAANKVHCSPATIIYRHAGGRTAIRNAVNNIHAARVIESMRD  
AIEGLTGAERVVSATAIALQRIRSDPLTQMIRSTRPPIDDDW  
MPSSEVVVQCAQEVLGQHDPDPLAQQWLIHVFLALWIWP  
MKDAEAEQLMLQRFLGPPYDAAGS

hypothetical protein      MMQGDLEIAYEIIIGEPEYILTGGGRFSKDAGGVRELAEAIA  
DRGKKVVIYDRLNCGASAVCFEGSSESVMQAESLARLIVDL  
DLGPTVLLGGGGARISLLAAARHPEIARAVVMWWPSGGA  
FGSMSLAEVNFPISRAAWNGTMADVADDPTWAEVITRN  
PRNRDRFLAQDKQTFIETMERWAHVYCACGNPLVAGLTDE  
EAAAITLPVLVFRSGKSDYFHTRATSERLAANLQNAEIIDPV  
WGDREFLDREYEDSRDNGVSVWINWKQLAPQIVDWTEKVL  
D

L-carnitine  
dehydratase/bile acid-  
inducible protein F      MIKVMEGVRVLELAQYTFVPAAGAILADWGADVIVKEHPV  
RGDTQRGFLYMGGIKLEADRHLIEHPNRGKRSVGVVDVSTP  
GGQEVLYELAKTSDVFLTNYPQARQKNKFDVEHIRAANP  
NIIYARGSAYGDKGPERLVGGFDGTAFWTRSGVGHALTPEA  
LGGALPQGIPAFGDSIGGMNIAGGISAALFHREKTGEAVEID  
VSLSTAWWAAGASVTQGMETGETMRSTMPDETPPIFNP  
FLGNFLTSDGGTINLCIVSPTGYIRDTEHLGLPELADDPFVS  
DVMPLIRNAAEAAELVAKAIRGKSFDYWREHLKTMKGQW  
APFQSLLELASDEQAIANDMIVEYEASAGDKPFRVVRGPVQ  
FNHEPLETTRAPQASEHTEIVLMELGMEWDRIEALKDAGAI  
A

hypothetical protein      MDDPVTDVEDTVESFPGIESGGKSTEVGHFMAAMRRLQD  
VVVSTDPDNELWGSAAAREVNDLCERFELHRVPAGFGLRGR  
GPHLPGLGHPLMPPWMMTEYGPDPGVTMQGHFSQYHVG  
SNNAVNGGVIPLLYDWQFGMIVSAVDRRDSRTAYLHIEYRK  
VTPINQPLTSRGRIETIDGRKVFVTATMTDSDGSSLSEASGL  
MIQLKSNQP

Long-chain-fatty-acid--  
CoA ligase (EC 6.2.1.3)

MYPGHWGITKPDHPAVIMAGTRETITYGELDRRSRCLAGFL  
WSRGLRRGDHVAILMHNDVRYFEMLWAALRSGMYVTPV  
NWHLKPDEVAYVIGDCEAKLLFTSARQSDLVEDIDWRTLPA  
LTTRVMADGTTTGFEPYESVVAFEGEPAEESSGAAMLTYSG  
TTGRPKGVLRPLPDTKPGDLDAASHRLAALFGIDEQSTYLSL  
APQYHAAPLFTLAAHRAGATVVMMEKFDARDALKAIDM  
HGVTHSQWVPTMFVRMLALSPEDKQAADLSTHSVALHAG  
APCPPEIKRQMIDWWGPILVEYYGGSDGGGFTVIDSLDWL  
AHPGSVGRSRTGAVYIVDEDADAVVGGQTGTVYFSGDPG  
FVYKGDPEKTERSRRAGGELSTMGDIGYLDADGYLYLDRK  
EFTIISGGVNIYPREAEDVLILHSDVQDVAVFGIPHHEFGEEV  
KAAVQLKPGVTATPELAGQLIAFTRARLASFKCPRSVDLEQ  
LPRTPTGKLRKADLRSAYAQGNSTP

hypothetical protein

MANKMFRKYGYDAVTLEQIADACVMSVRTILRYFNTKEAL  
ALAGEHELLESFRAQLGVREDAVTCWRNFRNETLPLMETP  
ESRERMRAIYETPPLLAEFLRIGEGYQQCLTAAIAEDWGEVA  
SLEATVFASVLVSTTSAAFRRWYVSEEPFDLVALQDIVDRVC  
VAFDKGRQSADGRRVGRVSAANTAPTRRAPTRRR

---

|     |       |      |           |        |        |                      |                                                                                                       |
|-----|-------|------|-----------|--------|--------|----------------------|-------------------------------------------------------------------------------------------------------|
| GI4 | 11329 | 61.3 | Contig 22 | 102354 | 113682 | hypothetical protein | MKMYAARILSIMRLAGGISSPALGRTNFTSSSKRSSFNSFQI<br>WILPPGKVL                                               |
|     |       |      |           |        |        | hypothetical protein | MREGFSWATATDSGRGSQRRSWAAAVDIFVDMAAADGG<br>AATSAHFSATRIARLAISIVQVWLYEWWHGPRDSAIEEDAE<br>RLVSFLSLWLRDED |

|                                           |                                                                                                                                                                                                                                                                                                |
|-------------------------------------------|------------------------------------------------------------------------------------------------------------------------------------------------------------------------------------------------------------------------------------------------------------------------------------------------|
| hypothetical protein                      | MYRWVAAMTAGYIVTAAGTGLKIFPTTPITGLVACIIFTNA<br>IFVAFWACWFLEGPCKRTTLEKADEFTMIWACVAAVGSE<br>MTWELPWLVDALGRAHITPHDRWVYIWHYARVDERYLI<br>SDGALWGMEAVVILAAVLLLQWFRLRSAPTHDPKRISAL<br>WWSLLAMVVMLTIFVVYAAEVRHGFANVQRGFWDITVI<br>FVYENLPWLAAPIISIPLTAKQLAYLYREQRRRTALAEEGALA<br>DDRADVRSLV               |
| hypothetical protein                      | MHASAPSRKVADLAERLQTIHFGREQSAEGGTIVSPSARIG<br>DC                                                                                                                                                                                                                                                |
| Protein of unknown<br>function DUF1486    | MTIFKQEIKAAAMPDMMTTDSALRRSREELVLRHVAENAH<br>DIDAAMATFTHPRYEIMPTGMVFDGAESVRTMLLQQWA<br>QLPMLQYSAEAIYHGEHGLVVETRRTTAPGRSIDMLSMNLF<br>FRGADLVLERCYFDQSLAAQLEALAPD                                                                                                                                 |
| hypothetical protein                      | MDGPSALRRRRFKFTETPVYGTDDRSLGLRPVGVPAEASM<br>QQ                                                                                                                                                                                                                                                 |
| hypothetical protein                      | MTRLTRNGSMISIEIDPTRVSMRSKGGATPSEHRRWGVRM<br>LGPLAHSLSRRRIHE                                                                                                                                                                                                                                    |
| TesB-like acyl-CoA<br>thioesterase 4      | MASPQEPYFTENGKTFVPSDVARGGWGPTVGGHAIGLL<br>ARAVESERADELIPARFTVDILRRVALAPVRVEASVVRSGR<br>RMQAVDAVMTQDGELVARAATFLRQSEQPQEIPWTPTR<br>SMPPLPEELTALPKGVPMQIVPYNDGVEMSGQLPWQQD<br>GLRQAWIREIRSLVGDEELTPFIRAAMAVDVTASMTGFTRT<br>GLGFINADYTLTLCLPKGSFVGLAGLTHHSAAGVGVGAAT<br>LFDAEGPIGTGVTTAAANTTFRGGAL |
| Transcriptional regulator,<br>TetR family | MRRSNLNAVARRANVSRSTLYRRFPTKEELLYAVVGRLTESI<br>FAELQHHTTGMTAKQLVVEVFCIAVRETTSNPVLHQLMVA<br>EPDTLAALLGFFGPGMSAVLDRAVELAVAQAINAGAKMPP<br>ADLRIVVELMIRLTSSLMNSPSAILDADDPAAARQFAQKFFA<br>PMIW                                                                                                       |

PROBABLE CHOLESTEROL DEHYDROGENASE MGRNLILELLAQGHQVRSIDLTRNPDADSRIEVAIGDICDPR  
VVAEVDGIDTVFHTAAVICLLGGRAATSQYREHSFAVNVE  
ATQSLVSHARDAGVSRLVYSSNTVVMGDEPIVGGNESLPY  
TTRFADLYTETKVVAERLVLQHNGSGLLTCAVRPSGIWGP  
GDQTMFRKLEAVASGQVRALIGSRKTVMDYTYIGNLVHA  
EILANQLGPNGRASGQAYFITDGEPVNVFEFARPVVEACG  
QHWPRLRVPGGLVRAVMTWWQWLHFRLGVTAPPLEPQI  
VTRLCVDNYYSIDKARRDLGYEPMFTREQGLASSLLYTD  
FKTMKHQAG

hypothetical protein MQNFNRPVAAGRKRYYVAMFVLGCLVTGIPFFGVGFGLM  
PPEPTYEIWGALIYIPLLPLFTAWRDAPGENGTWTERAAEF  
TMVWFPVTASSQITWETPWLIGDLTGVMHGAGPQDRWW  
WLWWGYGAADTRYLTS DAGLYGMEVVAVIGGLALFTAW  
FYLLRAKHTGDTMKRIKGLFVGIVACSMMLAVVTIYYVSETR  
AGFRNLEQGFWEFGFMFKFIFMNIWWVFAPLITIPMIKQID  
YLYKSMPRSIHQDVQPGAELQHAV

hypothetical protein MPNRRSDALPGIRGARREMYRQQILTA AEYEFARTGFAETR  
VATIAATADVSLATLYKNFAGKDEIWNALVEQRTNELVGLA  
RAATVGVQSPLERIIVGARAQVDFFAQHPNFLRLNVKENW  
SWATATEAARGGQRDAWRVGIAMVREAEAAAASGELR  
HLRPQIVAGLAVSALQVWLTDWVNSGVQRSPSQIADELQD  
YLRLLVPRATDTTPLRD

hypothetical protein MVRATGVIACSVFTIPMMIVFTAWRDAPGENRTLLERAN  
EFQTIWFFAAAAGSEITWETPWLIGDLMGWMHLTPKDTW  
GFAWWYYGDVDQRYLTS DGGGLWGLELAVVALAVILLVQW  
FRLRSAATHDPKRINALWWAFFAMAGMLSLFATYFLMEVR  
HGFSDFKLGFW EITVILGFENLPWLIAPVISLPFVAKQLTYLIR  
SAPAATGTPLRSGAVSSSAAGL

hypothetical protein  
 MNHINIVVEEFDAAVMHFQRVFGAQLVLDLPQPEWHACL  
 LDIGDVLFEVFSPPQFLNARYGPHYVGIEYQTGMDAARRA  
 VTMRNIRLVRDIGHAIHHPADTLGIAWEFFDGDGRVMPN  
 LKWLEPLHSPERWRAHPIGYTGLRRLSVAVHDCDRAAQFLA  
 DFFGAMIVYKESRKSLSATIIGMLLADTTIELISPTGEGAISEHL  
 HRYGDGIRSTVFEVADLERTHAHFKAIGIDLVDGDGPSTLAI  
 EPRDNLGVMMEFCAS

Transcriptional regulator,  
 IclR family  
 MVNLLAGLRGETLSISEIAGQLRFNLSTCHSMLAELVKAGVL  
 VRHPGTKRYALGPTLVTVWGVASAFDSYRVLEFAEPMSRLR  
 HQLHVSCVARALVGPDTVVLARRD TDGPAAFTPVGYRLAA  
 VPPIGAEFIAWESDATIDEWLNRPQRALD TTERTRMHALLA  
 EIRRDYRFLWADPAEQTPLATELIQTSASEDEPGDRLFEL  
 LQRRGYGRGPRTGTL SAI TVPIFGADAKPVLALLLTFNPVPID  
 ISEVEHYLRPLIHTCQRITTTIGGRAPN

---

|     |       |    |           |       |       |                      |                                                                                                                                                                                                                    |
|-----|-------|----|-----------|-------|-------|----------------------|--------------------------------------------------------------------------------------------------------------------------------------------------------------------------------------------------------------------|
| GI5 | 14057 | 58 | Contig 34 | 10279 | 24335 | hypothetical protein | MPVAIGNPCVEEHVASENVEIETLRRNRVGRRTARTSEHES<br>DALE                                                                                                                                                                  |
|     |       |    |           |       |       | hypothetical protein | MQFSQRRLAVSRWGGCPTYWSTKFIASLEIRHKSPFEQ                                                                                                                                                                             |
|     |       |    |           |       |       | hypothetical protein | MFWQKVMINVACVEGQDPDVFDDGGRVIAQSRSNRKGEA<br>LHHLVGVRLV LTERESD                                                                                                                                                      |
|     |       |    |           |       |       | hypothetical protein | MILDLIQTVAAVSVPIVVAVIGYKLNHRLKLYEASQWRNQEL<br>IKARLQYFGQLAPMLNDLMCYLTFIGRWKELTPPDLIAIKRD<br>TDRLFYSVAPLFLAAVTAYQDFLGACFTTHTGWGTDARICS<br>GFVRRREASREPWLAEWGQLFTHQDGAIPESMTAVRA<br>TYDKLLATLVEDVELLQPRDRYADSNLVANAR |
|     |       |    |           |       |       | hypothetical protein | MPFHPEVSISRESAKFARNYGHLKEETVINLPGVHRIW                                                                                                                                                                             |

hypothetical protein

MDALEGPSKISDSRQVALPKRLMDSLGWKGDYVMFRLS  
DDDPEVMKVVLESVVLRLRQRRGEDAERTMREQRAETTTDE  
SPQDRG

hypothetical protein

MTGLVRDPNVGFFDDQLTREAVVLAACNRLTFFVGAGAS  
LDLNLPTWSALVSDLLKDTISANFGPDSPVETICAELVNQLF  
QVPAASVIDSLLFDEARASLSGRPARSTIHAKMLSTRNERLR  
KSLYKRDRFGDITVGPTLVGKMLELAILLRAGVDVHIVTTN  
YDNAFEEAALHEPLFSIMSTERLRLVLFESPPEAGDLDEGDI  
PVVHIHGLLRAPSGYAAAGHNPIEGKIVFSEVDYIDWETGDF  
RTYLTNRVQSGLLTIGASLRDNNIVARLRDGTNRNNEPRYA  
LMPSESEFKYLSDKNIAEKYWMPFVEMAARRGFIFGVSILRP  
DFYGQVFQFLQELGVNVSSRINPGTAYVEYRARIQWAVA  
WSTVRESDEPGMRGNIETACRHLAVKFEALPQFDHCKVEV  
WARCEPDDRTMRRWCSSQSTWRPDAWPHTTLIRPLSKQ  
NAVMAFSSRGTVINKTPGSADRRWTHCLTVPVFLDGEPLW  
GLPVGAL EILLHESGAATSDECLNYLRANATPWWKEISKLGE  
KILTPEPWVD

ATP-dependent DNA  
helicase UvrD/PcrA

MTFKLAGKAKDAYEQDGRVMVLGGPGSGKTTLALLKAKRL  
LSSLEPEQDVLFLSFSRAAVRQVVLRCRDVLSAPERDRISVQT  
YHAFCMGILRAHGRLTGRPARILFPDREKVAKAGFEGDW  
NTERDRLATEESIYVFDHFASGAARLIGDVAKVAELVADRFP  
VIILDEFQDTSQWELVQALAVRSTVIILADADQRFIFEYDD  
NVDPNRLNQVREVLKPAEFDLVGENHRSPDAGILQFADAV  
LRNRALPETDDVQVISVYPRALESTAAAVRWLYSRLRKQGI  
QRPSIAVLARANGLVSDVSDWLSTARTYNGSELKPAHDLV  
WDVELSAAAAQIVASILEWPLHDAGRAVAQTLNAVANFYD  
VKNAINNTPIASAVRARDSYRANADSLTGGGTVRLKAAKHL  
VEQYPAMSAYGGDPAADWKTARDILAGADALKEIVQAARF  
IRLFGATDEIGGRLSEQWDRSGGYDNAVELVRRALDQGRLV  
TELREPQGCVLMNIHKSKEFDGVLIVEAQYKGVLFDFGRE  
EPPHMSSRLLRVGITRARHKVIIVRPKRAPPLASP

hypothetical protein

MKACYLHIQNFRGIEDGRVSFQPHTLLVGGNNVKGSTICEA  
MDLVLGPERLYRRPVIDEHDFYHGKYLDEDDSPLDVRIDLVL  
TDLTSEERRRFGDQHLRLWDNKTDSFIDEEAGGSELADAES  
VEWGLPVCFIGRYDKEEDDFVGETFFCHPEPVQDELVDVQI  
ASLGGGRAVFRRTHKRLAGYVYLRLALRTGSRALSLQRGSLLD  
TILQLGGEGSAEMWKDTLNHLSTLEPAIGDVPQLETVRELLR  
KRLGAFVNLAPGEHSAAFFASDLTRQHLREVVRLFVATQPS  
EHLVPYVRQGTGSINLLVFALLTIIADLKGQSQSVIFAMEEPEIA  
LPPHTQRRVTRYVLQQMGQSIVTSHSAPVIEQFEPESIVML  
HRDGTKLAGAPIDLTKIKRKYLTNRRQFAEAILARGVLLVE  
GSTEAVVFPASSVLERVRAGYTHLDFAGVSMFACSGDGDV  
DRFGPIFTALGKKSYGACDKPNTAPSADVMANRAAFDFHW  
ESAESGIEHVLVRGIPVEILRKFLDAVSARGDYPAAHYPNPA  
MSDDDVPALAFKVLKARKGEAFAYA AVLIEQCETEADLPPE  
LITILITIDDELRAEPEEPIEPESASESTEGE



|                      |                                                                                                                                                                                                                                                                                                                                                                                                                |
|----------------------|----------------------------------------------------------------------------------------------------------------------------------------------------------------------------------------------------------------------------------------------------------------------------------------------------------------------------------------------------------------------------------------------------------------|
| hypothetical protein | MVDWIRLTGGEHPDVAQAQLSRAGLTAADAELRISFGRIDPT<br>RDTIIMRVIRGHLRVNDAVRQVQEFRRSQATGS                                                                                                                                                                                                                                                                                                                                |
| hypothetical protein | MDDKAARLLSCLAHEYELTLPEDVARQLISDRLDGIAKRMRIG<br>RQAARSYVTNDVIQSLADEVVGSRSGTDDEASNVVSLSDRR<br>RSRRSNRR                                                                                                                                                                                                                                                                                                           |
| putative ATPase      | MSTRKLPISHISQLILTDYRVKPEVVVYAAFNQSQLDGSQPYV<br>ARRIIRTSATLDVLAALVPEHLQVSRVSSRGTEVLLFSGDAET<br>VFLEYATEQRLEVYVSASDHNHATAIANQITSRIPEAAPPKD<br>TVGVTVWHSGARGASPSLKSIRVPSWADIRRNYPGAVAEP<br>NDLFTTVRPHGYGKLLWHGEPGTGKTTALRALSREWKDW<br>CSIDYVADPERLFFDTGYLLEVIAKTSSDELQDSNTARWLLI<br>AEDSDEFLRVSARREAGAALGRLLNLSGILGQGSNTLILLTT<br>NERLDRLHPAVVRPGRCLAQVEFTRFPAAEANRWLPENHA<br>RVSEPKTLAELIEHRDATKQIATGIAPVTNIGAYL |

---

|     |       |      |           |       |       |                         |                                                                                                                                                                                                                                                                                                                                                                                                                                                                                                                                               |
|-----|-------|------|-----------|-------|-------|-------------------------|-----------------------------------------------------------------------------------------------------------------------------------------------------------------------------------------------------------------------------------------------------------------------------------------------------------------------------------------------------------------------------------------------------------------------------------------------------------------------------------------------------------------------------------------------|
| GI6 | 12666 | 59.7 | Contig 34 | 30105 | 42770 | NADH oxidase (putative) | MTVRHIVAVGGSDAGISAALRARELDPTTEVTVVVADAYPN<br>FSICGIPYYVSGEVTHWTNLAHRTAADLAATGMRVFTDTRA<br>TGINVEDHTLDVLDPTGAPEQLSYDALIVGTGAVISRPPIAGI<br>SGPDALGTVDGVHLLHSMGDTFAVMDSLQQRDPATAVIV<br>GAGYIGLEMAEALTTRGIRVTQIEALPEVLPTVDPPELGLVH<br>AELERNGVEVLTNTAVSAITRTDTGALSVIATHDGGQTISRTV<br>DFVLVVVGVVPDTELAADAGAELGVKGAVVDEAMRTNLP<br>DIFAAGDCVHHRLLGITWLPPLGTTAHHKQGRVAGENALG<br>GQAHFAGSLGTQVVKVFDVVAARTGLREHEALANRGWT<br>PVSSQSSPDDHKAYYPGATPVHIRITGDLHSGRLLGAQLVG<br>HRSAEIAKRVDYATALYHEMTVGGLELDLSYTPPLGSPW<br>DAIQMAAQTWARHHQPATATAASQPGTRRNLAAPN |
|-----|-------|------|-----------|-------|-------|-------------------------|-----------------------------------------------------------------------------------------------------------------------------------------------------------------------------------------------------------------------------------------------------------------------------------------------------------------------------------------------------------------------------------------------------------------------------------------------------------------------------------------------------------------------------------------------|

|                                                                            |                                                                                                                                                                                                                                                                                                                                                                                                                                                                                                                                                       |
|----------------------------------------------------------------------------|-------------------------------------------------------------------------------------------------------------------------------------------------------------------------------------------------------------------------------------------------------------------------------------------------------------------------------------------------------------------------------------------------------------------------------------------------------------------------------------------------------------------------------------------------------|
| dNTP<br>triphosphohydrolase,<br>broad substrate<br>specificity, subgroup 2 | MHAIIPNDPDQAAKRSTRPYAKPKSGGDARSEGQRDRDRV<br>LYSTAWRRLLGGVTQVVTPFSELPLLNRLTHSEKVAQVARSI<br>AEAKILSANETTQKLVQKLGFDLDVCEAAALAHDLGHPPF<br>GHIGEKILDDVARNKEILDLDGFEQNAQSLRILVIGKIRSNK<br>YEGNNPTYATIAAVSKYPWKRAGKRADHDEIIDTSEYRKH<br>WKKFSAYDPQYELTQAREFLPPCISEKEIQSLEASVMDVAD<br>DITYAVHDLEDFYLAGILDVSWIREDELEKYIRGEQKTGDVFFE<br>LASRLGVDYSGWFNDDMIRAAEWAERELKSGFNRRQVN<br>YSEVEAQARKRGSDFIDTFINAIEVRDEPFWTGGPYVGLDER<br>NWHRVQILKEITRSYVQRPDIALLQRGQQEVLEKFKLLYE<br>WSENDRARLPARLKREIEIAEEQLDGGSTIGYGKDQHAPRG<br>KNKNRAILDYICTLTDLECLQIYYKLSGIQVHRPGMVSF |
| hypothetical protein                                                       | MPEQERRGALINELKIVRKTGLHRLRERIDELPELSKLATATM<br>GAGSADDIERMLRHAFTSYAEGAQGTGTAIGILFGLEIGRRGAR<br>PSVLREVAARKRLGYDSVETFRKRPEYNAIAYFADLLHRLAVD<br>ANSQKPADVKNIDHIMSLITELTIPEYWELTRRVRQLFAAGS<br>QMS                                                                                                                                                                                                                                                                                                                                                       |
| hypothetical protein                                                       | MAQMDRQSIVRAREDFNRVREHLHQLELSRLAENAEADM<br>REECTIHAMRNAREVDDAARHFEGGREGLAMTIREMQAA<br>YNTGEIAHIAMRGCHR                                                                                                                                                                                                                                                                                                                                                                                                                                                |
| hypothetical protein                                                       | MAALPCFEDLWNGVTCLAAAPPVDPLIERLRQISQQLVEE<br>KRAMDRRAQQVIRAMQAVASAAGQDGGSTVQDDTSVER<br>WVVTE                                                                                                                                                                                                                                                                                                                                                                                                                                                           |
| hypothetical protein                                                       | MNSSGPGHFVDRDIGWCFSLAAAIALYCAVKLLADILPALV<br>VVVGALTLISLVGAGIVVFRITIRNRW                                                                                                                                                                                                                                                                                                                                                                                                                                                                              |
| hypothetical protein                                                       | MREAEADAEVKAAIADWAPDELQDEDNPSKGS DVEVGH D                                                                                                                                                                                                                                                                                                                                                                                                                                                                                                             |

hypothetical protein

MTDQLDVPLTADSLFWQQFFQPFQEAKAVGLLRHWAA  
QDHAPQLILEARSDVTGVEYLVGSQLRHAQQVRRSVEDLVE  
GSIVTSYEPGDREQISTARRLQLTTTTTRPLESDPVAAGRSIL  
HALTAVQRGERMVIQIVLGPRYQPLLGPPAPNRADQPVLK  
VLHGVLPEQRPD SRQALAHKLGQHG FRAALRIGVDAATAD  
RRRTLLGLAAAIRTAEPGVHLKLRPEKPREINAPRSTWSM  
FTRSQHLLTVTEVARLTGWPVSDRDEPFPGQPPRHPKPVRS  
GAVQTGERVVATANAPGAEGPVGYSVTDALRHTWVIGPN  
GVGKSTLLLN LIVQDLEAGRPIVVVEPKDLVRDILARVPEHRK  
EDIVLVDPFDVAPVGINPLDSRYRDGRQPEVVADALFGTFK  
AIHGDSLGP RSADILRNSLDV LARRDDASLVMLPLLLTNPGF  
RRSLTQHTMRDDPYAAGPFWQWFDSLSP EAIATTVAPLSN  
KLRPLLT KQLRAVLAQRSPKFNIRQVL TENKVLVPLQKGVIG  
PESAQLLGALVVAELWQAIRERAGTSEGTRT PLMVYIDEVQ  
DYLRLPTDLGDALATARGLGAGFH LAHQYEQ LPPAM LDA  
FRNNARSRICFQLRPGDAKEMVAGQSVLSVEDFGMLPAYH  
VYASLVRDNAVQPWASGITSAPPPKTS DPDEIRRSRERYG  
QPLDDIETGFSELLSGAAKAEKSD EMGGPKRRRRQA

hypothetical protein

MRREDNHDHAGPIGDP IRLSNKPPLTSINDKSG LANDGAHT  
GTPPKQTKKRRTQSHDIEALRERLSERDLAILRSVAEQFLT  
VRQIEAFYFADHPSATGGRLARRALARMRNLRL LGATNRRV  
GGVRS GSAGMVHYIDVVG DQLLDGRSGRGSRRFFNWSQR  
FVHHLAIADTHLALIEADRQAQLELVECLVEPASWRRFVGL  
GGARLALKADLYIEIATTPGSD FVNPWFVELDLGTESIATVLK  
KCRDYEAYRRTGTEQADGSGFPLVAWSMTHPDPTKAERRR  
LALRDAIDNDRNLPAALFRIIAPDKLIPLLRGGAV

|                       |                                                                                                                                                                                                                                                                                                                                                                          |
|-----------------------|--------------------------------------------------------------------------------------------------------------------------------------------------------------------------------------------------------------------------------------------------------------------------------------------------------------------------------------------------------------------------|
| DNA methylase N-4/N-6 | MGDALDRLRELPDSSIDMALTSPPYFRLRNYGEDGQIGLEQ<br>HVDQWADRLAAISAEIHRVLVPTGTFWLNLDYATHPSQ<br>GADRKSLMAPERLALRLQRAGWTVRNKVVWAKTNPMP<br>SIKDRLNCTYEFVYVFAKQPSYFFDLDAVRQPHRSSLRKP<br>YV AERRDAELWRGPNSDTATGLDAIKAAGR VGHPLGKN<br>PGD VWLLPSSSFRGAHHATFPVRLASRAIQAGCPEARCT<br>RCRLP WRRRVIRAIGGTAIRAALVPTCECRTTSEPGLV<br>LDPFIGSGTT AIAAEELARDWLGIELNPFAAMAERRIL<br>DARGRRQPEEKA A |
| hypothetical protein  | MSTPDESAKGVKTLGIRLQPDVHAQLSFIAQLREGTIT<br>DEIQI AITGHIARSKEDPELRGRADAARAEIEREAAAR<br>QKAIASLFTT EPPGSSGSDDTAGQSRPARRGQKGDSP<br>PEN                                                                                                                                                                                                                                       |
| hypothetical protein  | MSPKAKSLQAIGHVLGIPASELFAIAPWVTPQELPTIR<br>PYLRT KYRELPPAAVQEIETYFNDVARKHGISFDPN<br>DGPLDGEDE                                                                                                                                                                                                                                                                             |

---

|     |       |      |           |       |       |                                                  |                                                                                                                                                                                                                                                                                                                                                                                                                                                                                                                                                                                                                                                                                                                                                                                                                                                                                                                                                                                                                                                                                                                                                                                                                                                                         |
|-----|-------|------|-----------|-------|-------|--------------------------------------------------|-------------------------------------------------------------------------------------------------------------------------------------------------------------------------------------------------------------------------------------------------------------------------------------------------------------------------------------------------------------------------------------------------------------------------------------------------------------------------------------------------------------------------------------------------------------------------------------------------------------------------------------------------------------------------------------------------------------------------------------------------------------------------------------------------------------------------------------------------------------------------------------------------------------------------------------------------------------------------------------------------------------------------------------------------------------------------------------------------------------------------------------------------------------------------------------------------------------------------------------------------------------------------|
| GI7 | 12727 | 59.9 | Contig 35 | 75351 | 88077 | Superfamily II DNA/RNA<br>helicases, SNF2 family | MLLEELKPLRIAGLIPGQVVTVIFAQSHGADTVELTFKTAS<br>GGLDQQLIFRKDENKLSVAQTGGRPFSAPASEFKLVAAEQRI<br>TLAGLYDPM LAVATSDVRPLPHQISAVYGELLPRTPRFLLA<br>DDPGAGKTIMAGLYIKELILRDDIKRCLVVAPGGLVEQWQD<br>ELFFKFLRFDLLTNQAIDAYINDNVFETHPLLIARMDQLSR<br>NQELQIQDTEWDLVVIDEAHRMAAHYFGGKLEKTKRFQ<br>LGELLGRLTRHLLMTATPHSGKVEDYQLFLTLDRDRFEGK<br>NSQNPETTGIMRRMIKEDLLTFDGKRLFPERKAETVPYELTQ<br>LEENLYEQVTDYVREGMNRADRVGGKRKNTVGFALTVLQR<br>RLASSPEAIYKSLVRRTRQLHRKKQEILNGTYRETEPTVDLEG<br>LDADDYNAEEVEQLEEEELDAATASQTVEELDAELADLT<br>ALAKQVRDSGTDRKWSLRTILEDHALITDNDGAPRKFIFTE<br>HRDTLDYLTTRIRTLIGKPDVKAHGGVRRGERRLITEEFTK<br>NPETQILIATDAAGEGLNLQAAHLMVNYDLPWNPRIEQR<br>FGRIHRIGQEEVCRLWNIVASNTREGDVYTRLLIKIEEQRKAY<br>GGKVFVDVLGDAFHETPLRELLLKAIYRGDDPQVREKMHEVV<br>DATVSEGLPELLKERALAADHLAEADLAELRAAMDEARARR<br>LQPHYIELAFKAAFTRLGGRIAKRERGRYEIPHVPPQIRASKY<br>QPIATKYDRVTFDLEHVRPESQTRADLLAPGHPLHDAVMEE<br>TTKLLGGALNYGTVLVSSTLEEPHLLVGVIEEVC DATGASISR<br>RFGYAFVDSYGTVSHAGPAPYLDCVAAPDTPAVTAARQLP<br>WLAEAE DRAMSWIITNQLPGYLAEVQPRRAAE LAKTRALVI<br>KRLEGERDRLLFDSAIAAEKEHAGDKPKESSESLNRKAVDLD<br>VRLRKRLELLDQQELMSTKPPRIITAALVLPISMLEHEIPASAP<br>VHAKETKDVERRGVDLVLAYEKALGRQPAEQFTTNKGF DIL<br>STTPNGD TYRIEVKARLEGATDFYVTHNEVLLGKNAVPRYRL<br>ALVKVDPRGPEHDQVRYLDHPFATTELGD FEATGIRGDWN |
|-----|-------|------|-----------|-------|-------|--------------------------------------------------|-------------------------------------------------------------------------------------------------------------------------------------------------------------------------------------------------------------------------------------------------------------------------------------------------------------------------------------------------------------------------------------------------------------------------------------------------------------------------------------------------------------------------------------------------------------------------------------------------------------------------------------------------------------------------------------------------------------------------------------------------------------------------------------------------------------------------------------------------------------------------------------------------------------------------------------------------------------------------------------------------------------------------------------------------------------------------------------------------------------------------------------------------------------------------------------------------------------------------------------------------------------------------|

Adenine-specific DNA methylase containing a Zn-ribbon

MEGTLSDSAPKRKLIIEVALPLEAINRESAREKSIRHGH PSTLH  
LWWARRPLAAARAVLFAQLVDDPSARPDEFPTTEELQRKER  
NRLHKLIERLVVWESIRNEELFAEAHAEILKSTDG NPPPI LDP  
FAGGGTIPLEAQR LGMEAYASDLNPVAVLINKALIEIPP KFR  
GQPPVFPGLADSEIRSWKGAEGLAADV RAYGRWARDEAE  
KRIGHLYPKATLPDGSNATVIAWIWARTVTCPNPACGIDMP  
LVRSWWLGKKKGKESYIVPTIVDDRTAPGGRRVRFEIGNDP  
STGPMSSNDGTVARTTATCVACESPVPLPYVRAEGREGRLR  
TELMAIVAEGQRRRVYLAPTALQSDAARIGRPASVPVGS LP  
PHGLSPDSHQ TIRIYGFYEWADLFTNRQLVALTTFS DLVAVA  
HDRVLADGGPSDYADAVATYLGFAVSR LANKSSSTCSWDSS  
TKMEAVRGV FARQALPMTWDFAEANPWGGSGGDYLEDV  
EWVARAVERVPATRPGFAQQADARRVVM PANTLISTDPP  
YYDNIGYSDLSDFFYVWLRRSLRGIY PDLSTMLVPKADELV  
ANPHRHDGREGARQFFEDGFKSVFASARATATADFPITVYY  
AFKQSESDDDGQASTGWETLLEGMIQSGWEITSTWPMRS  
ELSNRMLASGTNALASSIVLSLRPRRADAPTTDKRSFITALEA  
ELPDALRKLQQGRIAPVDLPQATIGPGMAVFSRYAAVLEPD  
GKHMSVRSALARINEILDRLVNEQEADFDPTSRFAIAWYRA  
HGYNFGKYGDAELLANARGVVVQALDRAGVLISRAGRVNL  
LKPNDLGPNYDVVADLHTSNWEALHHLV RVLDAEGIERAG  
EFLRAALGRTDGIIDADLIKELAHLLFRVAETNGWTKDALS F  
NGLVTSWPEIVDTAHTKTPRTSQGSFNFEEDAD

FIG00863870:  
hypothetical protein

MALSNRDRINKMFEIVAPPLDDYISLVIGQGDPVGAAWP  
KLVRAKDGTSNAKTYNAHDPQVQFRMLTESNITAGFKKGW  
YPFNKTGKAGESFAIELREVRNNWAHNGMFTDDDAYRAL  
DTGERLLRLIGAANEAEVRSMLNLRRVTADKEDKKVLRA  
AVDNPEAAGLKAWRDVLPHPDDVATGNFAASEFAADLYK  
VAFGGEQDSGYANPVEFFQRTYLTEGLSDLIGRAVRRLSGD  
DNAPPVINLQTNFGGGKTHSMLALWHVAAGLPIGEFPQAT  
QDLSANKYSGGNVNRVAIVGNHFSFAGIERDGTHTTTW  
GELAWQLGGPEAYAYVAKADADRTPPGDALAKLLAAYAPT  
VILIDEWVAYARSLVGRDDLGGTFDDQFTFAQLLTEAKA  
TSGVLVVISIPASESGDAADRVAAGNAEEVGGAHGLEALKR  
LQNVVRRVADQWRPASSTEAYQIVKQRLFTQPDAVALASI  
NATARAYVDMYRKYTDDFPRESRDTAYEDRIKRTYPIHPELF  
DRLYEEWSSLERFQRTRGVLRLMSTVIHALWVGEDASPLIM  
PGSVPLATGSVNSELTQYLQDSWKAIIDADVDPNSEPARI  
DKDKPLFGQRSLTKRLARTVFFGAAPTIGAAHKGLETQRVFL  
GTAIPGDVPGNFHAALTQLADRATYFYTGSGKYWYDLQAN  
ITRTARDQAERLHKEDVWAEIVRRLQSQARSRGDFTVHV  
CPETNGDIPDTDEARLVILHPKVAHKKGTDSFAKEFAHMAT  
EHRGSANRTNRNTLVYLAADDEARLEELDTAARDYLGWTHV  
LNNAADLDLTENQKNQACQRQTAEQTVTARLLQTFTWA  
LVPAQPDGPAPFIIRETKVEGQSES LAERSRRLGNDGDL SIR  
QAAATIRLAINKVPQIWKDGHVSLGSLWALYCQYPMPRL  
RDRTVLNEGIVDMPMHWDVEAFALATAFDKSAHRYINLWI  
SGDKNAAPAPTDVALLVQPEVALKQREEEPPHGGDKPPY  
GGEPGSAKPPSIDVAFPPAKKRFYGVKTLSSDKIALDFKNIAD  
EISNLREPSTSLVVKIEIATDASGFDESKIRTVSENARTLKFD  
MVTPGACDTVIMPIGPAATALRADTTTTSEFGKRHFAPVW  
AV

hypothetical protein

FIG00828583:  
hypothetical protein

MSSHRTTFNHVGLCVSDRERSRRFYEGVLGFQFWWELDP  
DGPTAQLVQLPEPLGVHATYLV RDGFVLELMDYSKRQVHA  
GSERVMDQIGLTHISFSVSDLPGALKKVEEFGGAVVKETVTE  
AMAMIRDPDGQLELLSSGGWLAALPLRS

---

|     |       |      |           |       |       |                      |                                                                                                                                                                                                                                                                                                                                                                                                           |
|-----|-------|------|-----------|-------|-------|----------------------|-----------------------------------------------------------------------------------------------------------------------------------------------------------------------------------------------------------------------------------------------------------------------------------------------------------------------------------------------------------------------------------------------------------|
| GI8 | 37271 | 62.6 | Contig 37 | 19212 | 56482 | hypothetical protein | MRFTYFAAAVGVIAIALLGASPAHADYSGFTRCVGGIKQLPLN<br>EPDPQNFQRVGVIEQDLKSGVSPAEEAQKVAGMGFDQQT<br>AATIVQCIIEENP                                                                                                                                                                                                                                                                                                   |
|     |       |      |           |       |       | hypothetical protein | MHGKQIAIAGAAIVLAGCGGSGKTATTVTSAVEITKTVTVTA<br>PPPPFAPRTVIETDGTYRVGIDIVAGTYRSGGPSPEGGSDCY<br>WARLSSLNSTHIIDSDIGTGPQVVMIAPTDKAFLTRSCQTW<br>HKTD                                                                                                                                                                                                                                                             |
|     |       |      |           |       |       | hypothetical protein | MMSGHYLKTTTTDPGGGRAFTENWYFTPCGDGCADMSSP<br>ASGVSGRAMLVDGQWTL DSTEDIVCKGGVTEGNAANAHY<br>TWDPNLAGTVQVQNRGVCDHPPQSYLSFRLTKAP                                                                                                                                                                                                                                                                                 |
|     |       |      |           |       |       | Integrase            | MTIRRREAKSGTRWDVEWLLPDGTRKSKTFKTLRAAKLFDG<br>EVRSAEDGEAVDPRGGKTELRLVYKSWLASRPDLSPKVRR<br>GYEDNWRLRIEPKFGNWPIGRILREDVQEWINGMTADGL<br>GPRTVRWTHSVLRMTLDHAVTDKLRGKNPAANVRFPAM<br>GETSHVYLTAVEVAKLAELCDTASGESSRAAKQGDVVLILAY<br>TGLRFGELTGLNVEDVDLPARRIRVRRSITQLSGRLLGPPKS<br>RAGRRSVIPERLIATLERRIAGRTASEPAIVSPKGARLGLEN<br>WKRAVGWRTRIGELGHPTMRVHDLRHTYASLARSAGAD<br>MKLLQVTMGHASIVTAHTYADLYDSDLDRVADALDGLGD |
|     |       |      |           |       |       | hypothetical protein | MEQALLQLLVRADPVPLSLLHFVITGTWPPEAMQPRFDVSF<br>PKRSGSGAVPI                                                                                                                                                                                                                                                                                                                                                  |



|                                                    |                                                                                                                                                                                                                                                                                                                                                                                                                                                                                                                                                                  |
|----------------------------------------------------|------------------------------------------------------------------------------------------------------------------------------------------------------------------------------------------------------------------------------------------------------------------------------------------------------------------------------------------------------------------------------------------------------------------------------------------------------------------------------------------------------------------------------------------------------------------|
| hypothetical protein                               | MPKKGRGRRPVWCSARCRRQASAERIAARNAGAAARVVE<br>VPRAHRPDPNARLPLPSMHTLQRLFLSSDYQCQTLLDLAR<br>RYTSGAMGEQLRAAVQRFVAAIALEQALADDPVYRRARED<br>VERLRERLCREVERAERRDRELARLRRDAEELWRLRARVAEL<br>ESALAGVAHPLHQAGQHDQVPVSRQQRRAAQRAARKTC                                                                                                                                                                                                                                                                                                                                          |
| Death on curing protein,<br>Doc toxin              | MRRGELWFAATPGGDRPVILTRDPVADRIGAFVVAALTRT<br>RTGLVSELALTAPDDRLPSDCVVNFDFKIRCRAPRSDAGSLA<br>CLRRGYTRCVEHFERPPAAETSIRTRALISLVCLQER                                                                                                                                                                                                                                                                                                                                                                                                                                  |
| Long-chain-fatty-acid--<br>CoA ligase (EC 6.2.1.3) | MSISLLEMAASTNPHRGAVVSGDARLTVDLSVLADGGA<br>GVITSCAARHVAYVGTGGALLPLLLFASARAGVPFTPLNYRL<br>SGESLRELIARLPEPLLIVDVAFAGQVAGVGALTMHSYDFITA<br>ARTAEVSNFIDPDDVAVMLFTSGTTSRPAKAVQITHNNLTS<br>YVTGTVEFDSAAAEDATLICVPPYHIAGIGAALSPLYAGRKM<br>VYLRNFDERKWLELIGAEVTTATVVPTMLARIIAVLEDKPV<br>ELPTLRNLAYGGSKVALPLVRKALQLLPHVGFVNAYGLTETS<br>STVAVLGPEDHRAALCSPDPAVARRLGSVGVKVVPGIEAQIR<br>GEDGSILGPGQRGELFVRGAQISGNYADIGSVLDADGWFA<br>TNDIAEIDEEGYLFIGGRSDDTIIRGGENIAPAEIEDVLIHPPH<br>VRDVAVVGTEDPQWGQTILAVVPAEGTDPDPEELRAHVR<br>KHLRGSRTPDVVFRNELPTNATGKVLRRQLIVEFSSVTDEF<br>A |
| hypothetical protein                               | MRINRDPAIDERLVPQLARLRGRDFFYAVDTIIAGLQARLAA<br>KSAS                                                                                                                                                                                                                                                                                                                                                                                                                                                                                                               |

Butyryl-CoA  
dehydrogenase (EC  
1.3.99.2)

MVNAQSAEVADIKAVRSFVRDHVVALEPKIEADDDIPPQL  
RQACAEMGLFGTAIPEEYGGGLGADVETEVLAFELGWTPA  
LRAMFGTNGIAGEVLISAGSDEQRSAWLPRLASGAIASF  
ALTESEAGSDPSTMKTSARRDGGDWIIDGAKRFITNAPYAD  
IFVVFARTNPEVPAAQGISAFVLPKGTRGLQIGPRDAKMGQ  
AGEVTAPVYMDGVRVPGEAMVGGEGQGYAAAMRSLGPG  
RIRIAALCVGMAERLLEESLAYATTHHQSGRPIAEFQLIQAM  
LADSQTDIYAGRALALEAARAFDAGTDRRTGPSVAKYFCSE  
MVGRVADRAVQLHGGTGYMKGVTVERLYRDARVFRLYEG  
TSQIQQLIAGQSVRQYRNRAIGPS

Transcriptional regulator,  
GntR family

MPKRYGTKEKDQAVEYIIDRLLTGKLRGDRVDRNEIARDL  
GLSRVPVTEAIGQLEHDGIVTSRYHRGTFVERFDPATVLEHH  
EYGLLSGMASARAATYPTPRIDKLNELIRVLRATDSEIFE  
QTTWEYRRRTINHEYAGPRLQAAIRTSQSFIKAFWVNFEDN  
QRFMLPSYEREHAAILRHDSTAARAACEDRSMTTARVVVTE  
LVRRGVFESTDAVAPVDGLLSP

hypothetical protein

MGHEEFRLARDFIARNVTSYYDWITDGIFPAQSVPPTHQI  
GVMGFRDS

putative cytochrome  
P450 hydroxylase

MNEWYFTHRDDVLNALRTPEIYSSKKAFDMLGSPLPLVPIS  
YDPPEHTRFRKVLQPFSPHALGKMMPSLQQQVIDIIDNVA  
AKGECVVTDIAIPYPSQVFLTYGLPLADRDKLVNWKDVI  
ALADLPGVPGEDKLGPALELFAYLTNAITERKANPGPDILSQ  
VLTGEEPLDEAEAIGLSFLVLAGLDTVTATIGFALEKLACDP  
ALRGQLREDPKQTNVFVEEIVRLESAAPILPRITTEEVTVGGF  
RLPPGSPIRLCIGAINRDGSDDISTDRMVLGKVVHRHWGFG  
GGPHRCLGSHLARIELTVVNEWLSRIPDFEVKPGFTPQIEW  
PANTAALISLPVQWKS

|                                                              |                                                                                                                                                                                                                                                                                                                                                                                                                                                                                                                                                                  |
|--------------------------------------------------------------|------------------------------------------------------------------------------------------------------------------------------------------------------------------------------------------------------------------------------------------------------------------------------------------------------------------------------------------------------------------------------------------------------------------------------------------------------------------------------------------------------------------------------------------------------------------|
| Putative GntR-family<br>transcriptional regulator            | MTQFGVSRPTLREAFRILESEQLIEVLRGARGGARARRPDGP<br>AAGRYTGALLQSRGTTLDDVYQARAAL EESAIGLASGRGLS<br>RQIRELEELSTRGAGLIEDPAAYA EFDVVFHHSIMALAGNTT<br>LSVLADQLYSIIEAHNRAHLADHPAGYDVPACRTHQQRGHNK<br>LVRLLEIEGDLEGAQRHWRRHLDGVQKYMIEDSRVAVVDVL<br>SAAL                                                                                                                                                                                                                                                                                                                       |
| L-carnitine<br>dehydratase/bile acid-<br>inducible protein F | MVDDLTFEEAVALKKPMTGVRVIEVAEYTFVPSAGAVLA<br>DWGADVVKIENPVTGDAQRGLSVLSRSASRQGVFPFAM<br>MEAPNRGKRSIGLSLALSESRPAFEELIRRSDFLTSYLPRTA<br>KLRIDVTDVRRVNPDIIVAGSGFGHHGPDRDRGGYDATAF<br>WARGGSAQSVTQIDDDSPAPMPAGAYGDNIGGLTIAGAV<br>AAALFGRQNTGETSSIDVLLSVGAWAMQANINLAMLYGC<br>PLPVIGGRAPAPGNPLTGTYRCKDGRFIQLSMLQPTRYWPE<br>FCSLFGLASAATDPRFASMEALAQHNDEAIRLVAAEIGSRPF<br>EECNRLDQSSGPWAPLQDAWEVANDEALIANGRIADIIDS<br>QGHPQRLVANPAQFDGAPTRLNRAPLFAEHTDEVLRDLGV<br>DETELLQLKYAGAIT                                                                                          |
| Long-chain-fatty-acid--<br>CoA ligase (EC 6.2.1.3)           | MEPAPAPPRQFATWSQRILHLLSDDSDRAIVSMNHERIES<br>WTRAEVARTAGASDYLDVHGVQAGDCVPALLTSQPHSVA<br>LLIAGALTRRPLAPLAPRVTHREVFASLKNISGPVLVTEPQYR<br>DFASELAKATGKRIAVVDEIGAGNVALGADARRPEDIACML<br>HTSGTTGLPKVPVPEGPFERRAEILGQLCGFNGDARYVTA<br>ALFHVAVAGLGNLMPALANGASIIPLPSVDLWRNLASAAPT<br>HTTLVPSVIEMLLEEGVPAPPSLRVLAYGGSSIHPTVRRMQ<br>KVMPAVDLINLFGQTEGSPVTVLNADDHRRAAAGQEGLLS<br>SVGRPAPGVELRLNEPDANGIGEIWARSDFVVEEQGW<br>QRTGDLGRVVDVYLVGRRGDKIIRGGENVFPLEVEQILET<br>HPDVVSAGVVGKPDRLGETIVAFVVPVDVEEPPDSENLRV<br>HCRAQLAGFKVPVEWIFVDRLPRNPNGKLLRGELSRELARR<br>TSCGAKGHRVIWQ |

|                                                |                                                                                                                                                                                                                                                                                                                                                                                                                                         |
|------------------------------------------------|-----------------------------------------------------------------------------------------------------------------------------------------------------------------------------------------------------------------------------------------------------------------------------------------------------------------------------------------------------------------------------------------------------------------------------------------|
| Alpha-methylacyl-CoA<br>racemase (EC 5.1.99.4) | MGPLRGTRIIELAGIGPAPFGCMLLADLGAEVVVERAMSA<br>AALASIDDGGRSQADPRRYIPHRGRRSISLDLKSAEGRDALL<br>RLVETADVFEVGFPRGVTERLGVGPDDCLARNSRLVYARM<br>TGWGQSGPLASTAGHDINYIALAGVLDNFRRTGERPMPPL<br>NLVGDMMGGGMMMLAFGITAALVHAARTGEGQVIDAAMV<br>DGAALQMAVVLGGRAQGRWPGEPSNYSDTGAPQYEVY<br>ECADGKFVAVGALEGPFWSEFLRILDQPAGAVPSRDDPAL<br>WPQGKEALAKVFRTRKTRDEWAAMFDGSDACVTPVLSIDEA<br>PAHPHAKARSAFITVGGIEQPAPAPRFSATPADVPSAPPDR<br>GEHTEEVLRELGLTDEEIVAATGSQRV |
| MaoC family protein                            | MTETGSVVVGYSPPRRTDKPLKVTDFVRYQGASGDMNPIH<br>HDPEYAARAGYDQVFAVGMLAAGRLATYVTDWLGPENVR<br>KFGVRFKEQAWPGDELTYTATVVDSRTDENERVVDLQVLC<br>TRHTGGVHLTGWATVALKPTTDETDDGGPPSSD                                                                                                                                                                                                                                                                    |
| hypothetical protein                           | MAEPFDIPIELGKSREFAKATGSKHPAHYSPGGVTPPTFLMT<br>AILWQGPDNNAWPKDRDMRRVLHASQEFAPKGPPIRIG<br>MQLTGQQRIEGSHTKEGKRGGLTFTLLTEFRDEKGDVLA<br>EVRNTFVETSKPTGGDH                                                                                                                                                                                                                                                                                    |
| Alcohol dehydrogenase<br>(EC 1.1.1.1)          | MMKATALVLETPNHIERHIEIPAPAAGEAILRVLACGLCGS<br>DHELFTGAMPGSLPLIPGHEVVGVERATDEFLSARGLEQG<br>EVVALEVFQRCEQCDACRRGAYPLCRTYGLARSYGNTSIEW<br>GSGLWGGFATHLLLGCDAVHRVPPGLDAAAYATLFNPLGA<br>GVRWAHVLPQVQQGDVVAVLGPGLRGLSSVAVVSIAGAA<br>FTLLTGAGSRDRERMELGRTL GATETVDVTTTDARALLKERT<br>GGLADVVDVTAAPAAFLQAIDLARPGGTVVVAGTRGLH<br>ALKDFNPDRFVLKELLLGARGVDGTAYARALELLATDDRFE<br>AIPRVTCALDAGSVADLLGDMAHGEAPPLHAVIVP                                  |

|                                                                                   |                                                                                                                                                                                                                                                                                                                                                                                                                                     |
|-----------------------------------------------------------------------------------|-------------------------------------------------------------------------------------------------------------------------------------------------------------------------------------------------------------------------------------------------------------------------------------------------------------------------------------------------------------------------------------------------------------------------------------|
| Putative uncharacterized protein BCG_1584c                                        | MSEDEQRERHGKSLRFMFTKVPFNKVVGLELIDWSEPDVA<br>VVRLPFSEIDNSGGTAHGGAIATLADVAGSAAAWNGHDY<br>EKGTRGATVSVTINFTGAARGEAVIATARCVRRELNFTVEV<br>SIVSESRPVASGTVIYRIAT                                                                                                                                                                                                                                                                            |
| 3-ketoacyl-CoA thiolase (EC 2.3.1.16) @ Acetyl-CoA acetyltransferase (EC 2.3.1.9) | MPEAVIVEAVRTAIGKRNGALSGVHPTTLGAVVLGELVART<br>GVDPADVDDVQWGCVTQLGDQSSNVGRFTVLAAGWPET<br>VPAVTINRACGSSQQALDHAAYAVMSGQEQEIVVAGGCES<br>MSRVPLGAGRATGMPYGPAAAYDRFPGADFNQITGAQAIA<br>EKWGLSRRRLDEYSSRSHELAEAADHGKFDEQIVAVETSD<br>GHFRVDEGLRRGTTPETLAKLSSVSGPDGVIHAGNSSQISDG<br>AAAMLVTTPEKAKSLNLRPLARYVRGVAVGADPRLVLTGPI<br>PATQQVLAKSGLTIGDVGAFEVNEAFAPVPLAWLAETGAD<br>PARLNPLGGAIAVGHPLGASGAILMTRLVHHMRDKGIRYGL<br>QTMCEGGGTANATIVELFGD |
| Enoyl-CoA hydratase (EC 4.2.1.17)                                                 | MPELLSDAEAGVLTLTNRPQSRNAVSYSLLDNLIEAFEAAD<br>SDPSIRAIIVTGSFSDSYGTDLAAGGGGLDVNAPGFKPLRG<br>TKRDVGGVLALRLFCTKPVIAAVNGTAVGVGVTMILPMD<br>VRIAADSARFGLPFTRRGIVPESCATWFLPRIVGIATAIEWCV<br>TGRVFDAQEAAARGLVSELLPAEQVLPRAREIAAQIAEQASP<br>LSVALTRQMLWRQLGSPHPMSANRLESQAFLSLGGSADTK<br>EGIAAFKEKRKPHFTTAVPDDLPAFYPPWFADEEFADKS                                                                                                               |

3-ketoacyl-(acyl-carrier-  
protein) reductase( EC:1.-  
) MRLDGKVALVTGASRGIGLAIANCYAVNGAKVMLASRKAD  
GLAAAAATLDGQVAVKVANTRNLDDIEGLVDAVLDRWGR  
LDVLVNNAATCPYVGPVVDVEPGQRDRNFVNLRGSLFLIQ  
KAWRAWMVSNNGSSIINISSVGAFRTHRTMGFYDIGKAALA  
QLTRHLAGELGPRVRINAIVPGLVETRMAESIIKTRGV DIAAR  
IPLQRNGIPEDIAGAALFPAGAAWSWMTLPRRHAKGAIEP  
DRLAVDVG VLEQFARHAAELLRSSQPSRVRDVGCEGRTHFV  
TESSEHRGIEDPWRDCVHPDALRRQIARQDECHSAHTGFR  
GRIGRLTNLTLESGRRRHHHGAPVAIGRRWIARDSFSREP  
DDVVAADEIHSDDFFETVQRVCVSVTVEYTQPIAAPSAMY  
DRPQRSCINRGVERLTQTLGISDIRRDKGCADVLGGSR AVR  
RREVGDNHAGATPRQRRRTRESQPRRSSGHQGSRVIQIHL  
GLLYTSRQWIHINVKHLLARVDGTKSDRIVAGRRGVVLADS  
NLWLNPTAGGRRGWIPRHELTGEAPEHAHA

putative acyl-CoA  
dehydrogenase( EC:1.3.99.-  
) MGGWLSANAESLDEFRRHRAEAAERWARDLRFIRVLYAA  
GWNRHGWPAEYGGVGGPAVLRNVLYELENAGYRVPDC  
VIQLELQGEAFMKFAPEIAAARIPAALRGDEMWTQGFSEPE  
AGSDLASLRCKAVQDGDEWVITGQKTWSSYALSARWMGV  
LTRTGTPESRHRGITMFLVDLESPGVEVRPLRLANGVDECA  
DVFFDNVRVSADNRIGEVGGGWDVAMYLLQFERANYGW  
LRQAHLARRLRELVSNI DAPDRHTANVLGNCWLANLALRLR  
CGD TVRR LFAGQRIGPEASIDKVLI AQAEQPLNDAFRDLFPA  
QFLFDPGEESEVWRSEWYYSRAASIYGGAGEIQRGIADRLL  
GLPKEV

hypothetical protein MVQTKSTELFEEDGRNSPVFVKHIFKANVTGHRSRVA AVSS

acyl-CoA dehydrogenase domain protein MRGVDGDSVSSILLAGEEAVLVPTSGLQCSPA KGFDIVDG  
WTRWRGVSVSADDSVLDSTGARHVRVRAALASELNGIA  
SKVNELAVDHVTSRHQFGQALGSFQSVRHRLAETHVAIHAA  
MPVIELAWQATACGDAGSAELATAAKALAGRAFEIAAKNA  
HQVCGGMGLSWEHPLHRWVRRGTVLNSLIGSPDELAADL  
GGMLARGAALPVPNALCDDENQSTPA

Long-chain-fatty-acid--  
CoA ligase (EC 6.2.1.3) MRRRESVHPCMTRQPGVEVDPRHDGVTPLGENVDSPSHH  
YVTSLRHFAVKRPQDLAIVTPARSVTFAELSERANSLAGYLHS  
RGVAAGTPVALMSANSAELIEAFYAALVLGAPPANVNPRYH  
AHEVRYVLENCAAGAVLFDPTSATVVAEAVSAMEEPPFPLE  
FGSSRWRAAISSTTDYVRPQSVDDRLLIYGGTTGLPRAVE  
WRVVDHFRMIWQMVKPTEPPPTPEALIDSGRRAPTASPCS  
PILHGVGLSLTLNLTNGGGTVVSDRLTFDAADTFDLVRRYD  
VAVLGIVGDAFARPMLDELETGRWNGKLP SLRAISSAGAS  
WTSSIRDRMANLLPGVKMVS NFGSTEALVARDISSDHSIDP  
GDGLVVIGENDRPAQPGEVGVVATAGYLPLGYLGD PQKTA  
ETFRTINGRRYAVTGDEARVEADGRITLLGRGSAVINTGGEK  
VWPDEVEAVLRSVPGVLDVAVVGRPDERWGRVA AVLRI  
AGTAEISDQRLSQGCRERLAPYKCPRQYVRVDEIPRTPVGKP  
DYRAIDS LLEES

hypothetical protein MPKRYGTKEKEQESAAREERSTMMGRVAVTELVNRRGSE  
TYRGRHARYRDLDELTVGGY

Butyryl-CoA  
dehydrogenase (EC  
1.3.99.2)

MRRTLFDQEHEEFRVLVRDFIAKRVPVPHFDEWVDEGIVPR  
QLYRELGAIGAMGFAIPEQYGGGGVDDYRYNAVLOQEEAAR  
ANVTLGTMRTHLDVVLPLYLLKYANDEQRERWFPGLVSGDL  
FLAIAMTEPGTGSDLAGVKTTAKRDGSDFIVNGAKTFITGAA  
HADLIIVLARTGEPIDGNRRSGLSLLVVEDGVAGFTKGRRLP  
KLGLRVQDTVLSFEDVRVPAINLLGEVDQAFSYLGHNLAQ  
ERLAIAVGSVAQSRAAMEMTIDYVKNRNLFGTTVSAMQNT  
KFEIAAVATEIEAAQAMCDNGVRDLVDGELSGADA AKIKLF  
CTEMQARTVDRCLQLHGGYGYILEYPISRLYADARVSRIYGG  
TSEVLKSIISKSLGL

Enoyl-CoA hydratase (EC  
4.2.1.17)

MSDVLIVRDEAGVRQITMNRPERRNAMDIDTRRRFADLIV  
ESHNDPDRSIVITGAGGHFCAGADVTRMARSVDEEAAYE  
RVQTAQEIAQVMAEGAKPQIAAVTGSAVGLGMGIALACDY  
IVAGPDARFAGGFVRVGLCADNGVLFITLQVRGPARARTM  
MLLSETVPADEALRIGLIDKLTASDDQVLPAAIEVAATLAAG  
PPLALATISRAFTALPMTFMDALVREAELQAPLLCSDDHQE  
AATAFREKRRPVFTGR

hypothetical protein

MARWSDEFVFGQVWTDSDIPWEQQILVAITALATLGHHT  
QLRNYLHGALQGGVSEPALRHLSMLTVYAGFPVAIQALN  
VLSEVVAREARTTTTTHPENAPGSASGR

Acyl-CoA thioesterase II  
(EC 3.1.2.-)

MSDRLQERLQLDDVGNDRFSSSAPGAPVNIYGGELAAHAL  
VAANMTVTDDRPHSLHCTYLAAGDPAHGLEHQVTRIRDG  
RSFSVRRVDVFNGGRLSVSATVSYQTKSAGVEHRRRTAPRVP  
CPDDLPTFHGASNAAWIPWAEENPELEM RVAPHDPGDSL  
GRRTFWLKIRHDPAGSADDLLEAAYAAYASDFTMIASIRLP  
HEEPDVKTHVMTTLTHSLYFHKPFAASQWHLVDHWSPAA  
AGGRGLSIAHAYNASGDLTMTAVQESLVR SASKKAG



|                                                          |                                                                                                                                                                                                                                                                                                                                                                                                                                                                        |
|----------------------------------------------------------|------------------------------------------------------------------------------------------------------------------------------------------------------------------------------------------------------------------------------------------------------------------------------------------------------------------------------------------------------------------------------------------------------------------------------------------------------------------------|
| probable<br>oxidoreductase/Short-<br>chain dehydrogenase | MKIITGASSGIGKATATALAARGHQVVIACRTLKKGEAAA<br>QMSGDVRVQHLDLADLASVRRFADAVDTV DVLVNNAGVL<br>GLPYTRTV DGF EAHMG TNHLGHFALTCLLADRTTDRVVSL<br>SSAYKYATPHLDDLWERRKYSKSQAYGESKLATMLFINELA<br>RRGVRAYAADPGIVFSDITRDGGAILRWSGKYMHPPIGQTT<br>GNGARSTLLAIETTAPSGTCFAPGGLMHQWGKPKVVIPHR<br>KARNPRTALRLWELSAELTGCDAPYEPQASE                                                                                                                                                           |
| putative cytochrome<br>P450 hydroxylase                  | MTETAVGKPDVRYDPYDFEIDNDPYPTFRRLRDEAPLYYND<br>EYDFYALSRFHDVKQASVEWETYP SGRGSVLELIKSGAAIPP<br>GFILWEDPPRH D VHRG LLARVFTMRRIAQIEDKVRTVCTAT<br>LDKFVDTGRFDFVADLGSEIPMRTIGMMLGIPDSDQVSHR<br>DRTNEGIKLADGQAPVDG SALLTLDTQRIGDYINFRRRHP<br>ADDLMTDLLTATCTDSGGHERQLQDSTIQTYVGLLAAAGN<br>ETTVRLFSWAGKVLAEHPDQRRELANDPSLIPAAIEELLRFE<br>APSPVQARYVARDVEHHGRTMPQGSV VLLLTASANRDERA<br>FEDPDRFDIHRKTKNHVSFGFGIHHCLGAHLARLEARVLEE<br>VFKRFPEWDVDW DNAVQSHTSTVRGWEKLPVVASPSLRD<br>R |
| hypothetical protein                                     | MAFVTGAARGQGRAHRFPTSSPEEVANLAAGEARYITGQQ<br>IRIDGGALIEFPNGPTRI                                                                                                                                                                                                                                                                                                                                                                                                         |
| hypothetical protein                                     | MKLPVEPELESLRAAIAARAKSTVRPLAAQVDREQKFSWEL<br>WAAVRELGLSRIHFPEDHGGDGGTFRAYTIAS TEPAEYCAV<br>ASLYPGTSIQVAMALLQHGNPEHSRRFFAFWAAKRCGLGL<br>YRAVDRCGFS AQRVAFIPGYMSARQAAA V DPEAPTRPTSR<br>WLRSSSSLSWNFPAQTRRKIPARQLRPPMLWPSRR                                                                                                                                                                                                                                              |

---
