# Supplementary material for: Comparative Genomic Analysis Reveals a Possible Novel Non-Tuberculous Mycobacterium Species with High Pathogenic Potential
Source: PubMed Central journal article supplement (PMC4818103; doi:10.1371/journal.pone.0150413), 2016-04-01
Supplement: pone.0150413.s007.pdf [file pone.0150413.s007.pdf]

**Supplementary Table S3: A list of sporulation-related genes in UM\_CSW genome.**

| Putative Ortholog<br>in <i>Mycobacterium</i> | Annotation                                                        | NTM2<br>RAST_ORF_ID             | NTM2 Contig No. | Start | End   | NTM2 ID     | NTM2 RAST Annotation                                                | E-value   |
|----------------------------------------------|-------------------------------------------------------------------|---------------------------------|-----------------|-------|-------|-------------|---------------------------------------------------------------------|-----------|
| MMAR_0022                                    | hypothetical protein                                              | fig 66666666.3405<br>0.peg.468  | contig_105      | 609   | 887   | ID=M751500; | FIG025441: hypothetical<br>protein                                  | 5.00E-54  |
| MMAR_0523                                    | urea amidolyase-<br>related protein                               | fig 66666666.3405<br>0.peg.2543 | contig_24       | 28274 | 27390 | ID=M753601; | Allophanate hydrolase 2<br>subunit 2 (EC 3.5.1.54)                  | 1.00E-157 |
| MMAR_0524                                    | hypothetical protein                                              | fig 66666666.3405<br>0.peg.2544 | contig_24       | 28963 | 28289 | ID=M753602; | Allophanate hydrolase 2<br>subunit 1 (EC 3.5.1.54)                  | 6.00E-108 |
| MMAR_0541                                    | hypothetical protein                                              | fig 66666666.3405<br>0.peg.5719 | contig_82       | 3038  | 4891  | ID=M756788; | "AAA family ATPase, ESX-<br>1 secretion system<br>component Rv3868" | 0         |
|                                              | hypothetical protein                                              | fig 66666666.3405<br>0.peg.5824 | contig_86       | 15287 | 13500 | ID=M756894; | Type VII secretion AAA-<br>ATPase EccA                              | 7.00E-71  |
|                                              | hypothetical protein                                              | fig 66666666.3405<br>0.peg.1653 | contig_15       | 48723 | 49397 | ID=M752705; | PROBABLE CONSERVED<br>MEMBRANE PROTEIN                              | 8.00E-30  |
| MMAR_0606                                    | alpha-D-glucose-1-<br>phosphate<br>thymidyl-<br>transferase, RmlA | fig 66666666.3405<br>0.peg.4337 | contig_52       | 4643  | 5722  | ID=M755404; | D-glycero-D-manno-<br>heptose 1-phosphate<br>guanosyltransferase    | 5.00E-20  |
| MMAR_1081                                    | dTDP-4-<br>dehydrorhamnose<br>3,5-epimerase,<br>RmlC              | fig 66666666.3405<br>0.peg.1947 | contig_18       | 3709  | 3089  | ID=M753004; | "dTDP-4-<br>dehydrorhamnose 3,5-<br>epimerase (EC 5.1.3.13)"        | 3.00E-109 |
|                                              | dTDP-4-<br>dehydrorhamnose<br>3,5-epimerase,<br>RmlC              | fig 66666666.3405<br>0.peg.483  | contig_106      | 15242 | 14685 | ID=M751515; | "dTDP-4-<br>dehydrorhamnose 3,5-<br>epimerase (EC 5.1.3.13)"        | 1.00E-20  |

|           |                                            |                            |            |       |       |                                                                |           |
|-----------|--------------------------------------------|----------------------------|------------|-------|-------|----------------------------------------------------------------|-----------|
| MMAR_1082 | TDP-glucose-4,6-dehydratase, RmlB          | fig 6666666.34050.peg.1948 | contig_18  | 4712  | 3711  | ID=M753005; "dTDP-glucose 4,6-dehydratase (EC 4.2.1.46)"       | 0         |
|           | TDP-glucose-4,6-dehydratase, RmlB          | fig 6666666.34050.peg.4630 | contig_58  | 3736  | 4731  | ID=M755696; "dTDP-glucose 4,6-dehydratase (EC 4.2.1.46)"       | 2.00E-26  |
|           | TDP-glucose-4,6-dehydratase, RmlB          | fig 6666666.34050.peg.1327 | contig_135 | 13053 | 13997 | ID=M752377; UDP-glucose 4-epimerase (EC 5.1.3.2)               | 9.00E-20  |
|           | TDP-glucose-4,6-dehydratase, RmlB          | fig 6666666.34050.peg.5650 | contig_80  | 1252  | 2301  | ID=M756719; "dTDP-glucose 4,6-dehydratase (EC 4.2.1.46)"       | 9.00E-17  |
|           | TDP-glucose-4,6-dehydratase, RmlB          | fig 6666666.34050.peg.2450 | contig_23  | 36072 | 35128 | ID=M753508; "dTDP-glucose 4,6-dehydratase (EC 4.2.1.46)"       | 5.00E-14  |
|           | TDP-glucose-4,6-dehydratase, RmlB          | fig 6666666.34050.peg.4634 | contig_58  | 11743 | 10670 | ID=M755700; NAD-dependent epimerase/dehydratase family protein | 1.00E-13  |
|           | TDP-glucose-4,6-dehydratase, RmlB          | fig 6666666.34050.peg.2448 | contig_23  | 33113 | 34129 | ID=M753506; "GDP-mannose 4,6-dehydratase (EC 4.2.1.47)"        | 8.00E-13  |
| MMAR_1248 | alternate RNA polymerase sigma factor SigF | fig 6666666.34050.peg.5299 | contig_70  | 17916 | 17128 | ID=M756367; RNA polymerase sigma factor SigB                   | 4.00E-122 |
|           | alternate RNA polymerase sigma factor SigF | fig 6666666.34050.peg.1680 | contig_153 | 6810  | 7619  | ID=M752732; RNA polymerase sigma factor SigB                   | 2.00E-65  |
|           | alternate RNA polymerase sigma factor SigF | fig 6666666.34050.peg.6050 | contig_98  | 10936 | 9413  | ID=M757121; RNA polymerase sigma factor RpoD                   | 8.00E-10  |
|           | alternate RNA polymerase sigma factor SigF | fig 6666666.34050.peg.6074 | contig_99  | 16607 | 15648 | ID=M757145; RNA polymerase sigma factor SigB                   | 3.00E-09  |

|           |                                               |                             |            |        |        |                                                                     |           |
|-----------|-----------------------------------------------|-----------------------------|------------|--------|--------|---------------------------------------------------------------------|-----------|
| MMAR_1275 | dTDP-6-deoxy-L-lyxo-4-hexulose reductase RmlD | fig 66666666.34050.peg.4335 | contig_52  | 2868   | 3755   | ID=M755402; dTDP-4-dehydrorhamnose reductase (EC 1.1.1.133)         | 3.00E-98  |
| MMAR_1618 | Multicopper oxidase, type 1, CueO             | fig 66666666.34050.peg.3300 | contig_35  | 44286  | 45827  | ID=M754361; Multicopper oxidase                                     | 1.00E-16  |
| MMAR_1967 | cell division transmembrane protein FtsK      | fig 66666666.34050.peg.4404 | contig_53  | 58648  | 60966  | ID=M755471; Cell division protein FtsK                              | 0         |
|           | cell division transmembrane protein FtsK      | fig 66666666.34050.peg.1966 | contig_18  | 20480  | 23926  | ID=M753023; FtsK/SpoIIIE family protein                             | 1.00E-16  |
|           | cell division transmembrane protein FtsK      | fig 66666666.34050.peg.5968 | contig_95  | 8836   | 13005  | ID=M757039; "Type VII secretion protein EccCa, FtsK/SpoIIIE family" | 6.00E-09  |
| MMAR_2098 | Probable transcriptional regulatory protein   | fig 66666666.34050.peg.420  | contig_103 | 15265  | 14510  | ID=M751452; FIG000859: hypothetical protein                         | 6.00E-153 |
| MMAR_2129 | site-specific integrase                       |                             |            |        |        |                                                                     |           |
| MMAR_2320 | pyridoxal phosphate-dependent enzyme, WecE    |                             |            |        |        |                                                                     |           |
| MMAR_3184 | hypothetical protein                          | fig 66666666.34050.peg.1526 | contig_14  | 131297 | 130935 | ID=M752577; Probable transmembrane protein                          | 1.00E-12  |
| MMAR_3194 | FtsW-like protein FtsW                        | fig 66666666.34050.peg.4328 | contig_51  | 32721  | 34406  | ID=M755395; Cell division protein FtsW                              | 0         |
|           | FtsW-like protein FtsW                        | fig 66666666.34050.peg.471  | contig_105 | 2985   | 4394   | ID=M751503; Cell division protein FtsW                              | 3.00E-18  |

|           |                                                |                                |            |       |       |                                                                                                             |           |
|-----------|------------------------------------------------|--------------------------------|------------|-------|-------|-------------------------------------------------------------------------------------------------------------|-----------|
| MMAR_3765 | GTPase ObgE                                    | fig 6666666.3405<br>0.peg.5229 | contig_7   | 10571 | 12013 | ID=M756297; COG0536: GTP-binding protein Obg                                                                | 0         |
|           | GTPase ObgE                                    | fig 6666666.3405<br>0.peg.2556 | contig_25  | 6205  | 5132  | ID=M753614; GTP-binding and nucleic acid-binding protein YchF                                               | 6.00E-12  |
| MMAR_4208 | proline and glycine rich transmembrane protein | fig 6666666.3405<br>0.peg.4011 | contig_45  | 10221 | 9676  | ID=M755077; Basic proline-rich protein                                                                      | 2.00E-12  |
| MMAR_4226 | glycosyl transferase                           | fig 6666666.3405<br>0.peg.1292 | contig_130 | 5848  | 4685  | ID=M752340; "Predicted glycogen synthase, ADP-glucose transglucosylase (EC 2.4.1.21), Actinobacterial type" | 0         |
|           | glycosyl transferase                           | fig 6666666.3405<br>0.peg.3140 | contig_33  | 39833 | 38604 | ID=M754197; Glycosyltransferase                                                                             | 4.00E-17  |
|           | glycosyl transferase                           | fig 6666666.3405<br>0.peg.5649 | contig_80  | 27    | 1247  | ID=M756718; "Glycosyl transferase, group 1"                                                                 | 1.00E-16  |
|           | glycosyl transferase                           | fig 6666666.3405<br>0.peg.2880 | contig_29  | 74155 | 75486 | ID=M753937; Glycosyltransferase MshA involved in mycothiol biosynthesis (EC 2.4.1.-)                        | 1.00E-13  |
| MMAR_4455 | two-component transcriptional regulator TrcR   | fig 6666666.3405<br>0.peg.4417 | contig_54  | 6529  | 7302  | ID=M755483; DNA-binding response regulator TrcR                                                             | 2.00E-148 |
|           | two-component transcriptional regulator TrcR   | fig 6666666.3405<br>0.peg.2280 | contig_21  | 26121 | 25417 | ID=M753338; putative two-component system response regulator                                                | 8.00E-86  |
|           | two-component transcriptional regulator TrcR   | fig 6666666.3405<br>0.peg.5892 | contig_91  | 20230 | 20922 | ID=M756962; Two-component response regulator                                                                | 2.00E-59  |

|           |                                               |                            |            |        |        |             |                                                                                 |           |
|-----------|-----------------------------------------------|----------------------------|------------|--------|--------|-------------|---------------------------------------------------------------------------------|-----------|
|           | two-component transcriptional regulator TrcR  | fig 6666666.34050.peg.5587 | contig_79  | 44006  | 44677  | ID=M756656; | DNA-binding response regulator                                                  | 3.00E-57  |
| MMAR_4473 | peptidyl-tRNA hydrolase Pth                   | fig 6666666.34050.peg.503  | contig_106 | 33574  | 32999  | ID=M751535; | Peptidyl-tRNA hydrolase (EC 3.1.1.29)                                           | 3.00E-102 |
| MMAR_4853 | hypothetical protein                          | fig 6666666.34050.peg.1867 | contig_17  | 105788 | 105991 | ID=M752924; | zinc transporter Slc39a7                                                        | 6.00E-04  |
| MMAR_5181 | anti-anti-sigma regulatory factor             | fig 6666666.34050.peg.4150 | contig_48  | 44227  | 43913  | ID=M755217; | Anti-sigma F factor antagonist (spolIIA-2); Anti-sigma B factor antagonist RsbV | 5.00E-54  |
|           | anti-anti-sigma regulatory factor             | fig 6666666.34050.peg.4218 | contig_5   | 22087  | 22383  | ID=M755285; | Anti-sigma F factor antagonist (spolIIA-2); Anti-sigma B factor antagonist RsbV | 5.00E-19  |
|           | anti-anti-sigma regulatory factor             | fig 6666666.34050.peg.3491 | contig_38  | 27862  | 28299  | ID=M754557; | Anti-sigma F factor antagonist (spolIIA-2); Anti-sigma B factor antagonist RsbV | 2.00E-07  |
| MMAR_5186 | sensor-component of a two-component regulator | fig 6666666.34050.peg.4155 | contig_48  | 46759  | 48975  | ID=M755222; | "Serine phosphatase RsbU, regulator of sigma subunit"                           | 0         |
|           | sensor-component of a two-component regulator | fig 6666666.34050.peg.5167 | contig_69  | 11937  | 9406   | ID=M756235; | "Serine phosphatase RsbU, regulator of sigma subunit"                           | 7.00E-88  |
|           | sensor-component of a two-component regulator | fig 6666666.34050.peg.394  | contig_102 | 7792   | 4001   | ID=M751426; | FIG00829714: hypothetical protein                                               | 3.00E-47  |

|           |                                               |                             |           |       |       |             |                                                                                               |          |
|-----------|-----------------------------------------------|-----------------------------|-----------|-------|-------|-------------|-----------------------------------------------------------------------------------------------|----------|
|           | sensor-component of a two-component regulator | fig 6666666.3405 0.peg.840  | contig_12 | 24997 | 26952 | ID=M751875; | "Serine phosphatase RsbU, regulator of sigma subunit"                                         | 4.00E-29 |
|           | sensor-component of a two-component regulator | fig 6666666.3405 0.peg.4263 | contig_5  | 67793 | 67443 | ID=M755330; | "Serine phosphatase RsbU, regulator of sigma subunit"                                         | 2.00E-08 |
| MMAR_5481 | chromosome partitioning protein ParB          | fig 6666666.3405 0.peg.1635 | contig_15 | 28423 | 29406 | ID=M752687; | Chromosome (plasmid) partitioning protein ParB / Stage 0 sporulation protein J                | 0        |
| MMAR_5482 | chromosome partitioning protein ParA          | fig 6666666.3405 0.peg.1634 | contig_15 | 27419 | 28399 | ID=M752686; | Chromosome (plasmid) partitioning protein ParA / Sporulation initiation inhibitor protein Soj | 0        |
|           | chromosome partitioning protein ParA          | fig 6666666.3405 0.peg.4843 | contig_61 | 8540  | 7620  | ID=M755910; | Chromosome (plasmid) partitioning protein ParA / Sporulation initiation inhibitor protein Soj | 1.00E-46 |
|           | chromosome partitioning protein ParA          | fig 6666666.3405 0.peg.2996 | contig_31 | 15415 | 14615 | ID=M754053; | Chromosome (plasmid) partitioning protein ParA / Sporulation initiation inhibitor protein Soj | 2.00E-44 |
| MMAR_5484 | hypothetical protein                          | fig 6666666.3405 0.peg.1632 | contig_15 | 26031 | 26618 | ID=M752684; | RNA-binding protein Jag                                                                       | 4.00E-64 |

|           |                                                            |                            |            |       |       |             |                                                                |           |
|-----------|------------------------------------------------------------|----------------------------|------------|-------|-------|-------------|----------------------------------------------------------------|-----------|
| MMAR_5485 | putative inner membrane protein translocase component YidC | fig 6666666.34050.peg.1631 | contig_15  | 24825 | 25949 | ID=M752683; | "Inner membrane protein translocase component YidC, long form" | 8.00E-163 |
| MT0125    | hypothetical protein                                       | fig 6666666.34050.peg.3381 | contig_36  | 42617 | 41862 | ID=M754442; | Possible membrane protein                                      | 2.00E-101 |
| MT0125    | hypothetical protein                                       | fig 6666666.34050.peg.738  | contig_115 | 2314  | 1505  | ID=M751773; | COG1376: Uncharacterized protein conserved in bacteria         | 1.00E-60  |
| MT2818    | acetyltransferase, GNAT family                             | fig 6666666.34050.peg.4405 | contig_53  | 61521 | 61033 | ID=M755472; | "Acetyltransferase, GNAT family"                               | 1.00E-103 |
