# Supplementary material for: Comparative Genomic Analysis Reveals a Possible Novel Non-Tuberculous Mycobacterium Species with High Pathogenic Potential
Source: PubMed Central journal article supplement (PMC4818103; doi:10.1371/journal.pone.0150413), 2016-04-01
Supplement: pone.0150413.s008.pdf [file pone.0150413.s008.pdf]

**Supplementary Table S4: Prediction of human pathogen using PathogenFinder.**

| <b>Organism</b>                                  | <b>Sequences</b> | <b>Avg seq length</b> | <b>Probability of being human pathogen</b> | <b>Genome Coverage (%)</b> | <b>Pathogenic Families Matched</b> | <b>Non-Pathogenic Families Matched</b> | <b>The organism predicted as human pathogenic</b> |
|--------------------------------------------------|------------------|-----------------------|--------------------------------------------|----------------------------|------------------------------------|----------------------------------------|---------------------------------------------------|
| <i>Mycobacterium gilvum</i> PYR-GCK              | 5368             | 323                   | 0.222                                      | 1.02                       | 1                                  | 54                                     | No                                                |
| <i>Mycobacterium</i> sp. JLS                     | 5834             | 320                   | 0.223                                      | 14.45                      | 0                                  | 843                                    | No                                                |
| <i>Mycobacterium</i> sp. KMS                     | 5527             | 321                   | 0.231                                      | 17.01                      | 0                                  | 940                                    | No                                                |
| <i>Mycobacterium</i> sp. MCS                     | 5480             | 322                   | 0.231                                      | 16.92                      | 0                                  | 927                                    | No                                                |
| <i>Mycobacterium rhodesiae</i> NBB3              | 6277             | 316                   | 0.245                                      | 0.81                       | 2                                  | 49                                     | No                                                |
| <i>Mycobacterium vaccae</i> ATCC 25954           | 5914             | 325                   | 0.417                                      | 0.24                       | 4                                  | 10                                     | No                                                |
| <i>Mycobacterium thermoresistibile</i> ATCC19527 | 1695             | 327                   | 0.449                                      | 0.53                       | 3                                  | 6                                      | No                                                |
| <i>Mycobacterium smegmatis</i> JS623             | 6398             | 309                   | 0.523                                      | 0.27                       | 8                                  | 9                                      | Yes                                               |
| <i>Mycobacterium kansasii</i> ATCC12478          | 5633             | 340                   | 0.833                                      | 0.67                       | 33                                 | 5                                      | Yes                                               |
| <i>Mycobacterium</i> sp. UM CSW                  | 6042             | 319                   | 0.841                                      | 0.56                       | 30                                 | 4                                      | Yes                                               |
| <i>Mycobacterium avium</i> 104                   | 5192             | 322                   | 0.883                                      | 13.52                      | 702                                | 0                                      | Yes                                               |
| <i>Mycobacterium ulcerans</i> Agy99              | 5477             | 306                   | 0.895                                      | 12.93                      | 708                                | 0                                      | Yes                                               |
| <i>Mycobacterium marinum</i> M                   | 5577             | 358                   | 0.9                                        | 19.15                      | 1068                               | 0                                      | Yes                                               |
| <i>Mycobacterium intracellulare</i> ATCC13950    | 5036             | 327                   | 0.906                                      | 0.85                       | 42                                 | 1                                      | Yes                                               |
| <i>Mycobacterium indicus pranii</i> MTCC9506     | 5182             | 328                   | 0.907                                      | 0.85                       | 43                                 | 1                                      | Yes                                               |
| <i>Mycobacterium tuberculosis</i> H37Rv          | 4086             | 326                   | 0.922                                      | 27.29                      | 1115                               | 0                                      | Yes                                               |
| <i>Mycobacterium africanum</i> GM041182          | 4041             | 327                   | 0.924                                      | 22.17                      | 896                                | 0                                      | Yes                                               |
| <i>Mycobacterium canettii</i> CIPT140010059      | 4070             | 332                   | 0.926                                      | 10.44                      | 425                                | 0                                      | Yes                                               |
| <i>Mycobacterium cosmeticum</i> strain DSM 44829 | 4232             | 197                   | 0.931                                      | 3.07                       | 130                                | 0                                      | Yes                                               |
| <i>Mycobacterium leprae</i> TN                   | 3995             | 187                   | 0.931                                      | 3.25                       | 130                                | 0                                      | Yes                                               |
