# Supplementary material for: Comparative Genomic Analysis Reveals a Possible Novel Non-Tuberculous Mycobacterium Species with High Pathogenic Potential
Source: PubMed Central journal article supplement (PMC4818103; doi:10.1371/journal.pone.0150413), 2016-04-01
Supplement: pone.0150413.s009.pdf [file pone.0150413.s009.pdf]

**Supplementary Table S5: A list of predicted virulence genes in the UM\_CSW genome.**

| query_id                | sub_id  | virulence_gene                                                                                                                                                  | Sequence Identity (%) | Query length (aa) | Subject length (aa) |
|-------------------------|---------|-----------------------------------------------------------------------------------------------------------------------------------------------------------------|-----------------------|-------------------|---------------------|
| fig 6666666.28482.peg.9 | R013489 | (gi:118462718) nuoG (MAV 4039) - NADH-quinone oxidoreductase, chain g [Mycobacterium avium str. 104]                                                            | 68.41                 | 763               | 766                 |
| fig 6666666.28482.peg.9 | R019200 | (gi:183981492) nuoG (MMAR 1477) - NADH dehydrogenase subunit G [Mycobacterium marinum str. M]                                                                   | 69.21                 | 764               | 766                 |
| fig 6666666.28482.peg.9 | R013490 | (gi:118617952) nuoG (MUL 2465) - NADH dehydrogenase I (chain G) NuoG (NADH-ubiquinone oxidoreductase chain G) [Mycobacterium ulcerans str. Agy99]               | 68.96                 | 764               | 766                 |
| fig 6666666.28482.peg.9 | R013485 | (gi:15842727) nuoG (MT3239) - NADH dehydrogenase gamma subunit [Mycobacterium tuberculosis str. CDC1551]                                                        | 69.46                 | 764               | 766                 |
| fig 6666666.28482.peg.9 | R019204 | (gi:253800185) nuoG (TBMG 03194) - NADH dehydrogenase subunit G [Mycobacterium tuberculosis str. KZN 1435]                                                      | 69.46                 | 764               | 766                 |
| fig 6666666.28482.peg.9 | R013482 | (gi:148824345) nuoG (TBFG 13172) - NADH dehydrogenase I chain G nuoG (NADH-ubiquinone oxidoreductase chain G) [Mycobacterium tuberculosis str. F11]             | 69.46                 | 764               | 766                 |
| fig 6666666.28482.peg.9 | R019205 | (gi:224991526) nuoG (JTY 3169) - NADH dehydrogenase subunit G [Mycobacterium bovis str. BCG str. Tokyo 172]                                                     | 69.46                 | 764               | 766                 |
| fig 6666666.28482.peg.9 | R013487 | (gi:121639034) nuoG (BCG 3174) - putative NADH dehydrogenase I (chain G) nuoG [Mycobacterium bovis str. BCG Pasteur 1173P2]                                     | 69.46                 | 764               | 766                 |
| fig 6666666.28482.peg.9 | R013486 | (gi:31794327) nuoG (Mb3175) - NADH dehydrogenase gamma subunit [Mycobacterium bovis str. AF2122/97]                                                             | 69.46                 | 764               | 766                 |
| fig 6666666.28482.peg.9 | R019202 | (gi:339633158) nuoG (MAF 31590) - putative NADH dehydrogenase I (chain G) NUOG (NADH-ubiquinone oxidoreductase chain G) [Mycobacterium africanum str. GM041182] | 69.46                 | 764               | 766                 |
| fig 6666666.28482.peg.9 | R019203 | (gi:340628127) nuoG (MCAN 31651) - putative NADH dehydrogenase I subunit G NuoG [Mycobacterium canettii str. CIPT 140010059]                                    | 69.46                 | 764               | 766                 |
| fig 6666666.28482.peg.9 | R013483 | (gi:15610287) nuoG (Rv3151) - NADH dehydrogenase gamma subunit [Mycobacterium tuberculosis str. H37Rv]                                                          | 69.33                 | 764               | 766                 |
| fig 6666666.28482.peg.9 | R013484 | (gi:148663006) nuoG (MRA 3184) - NADH dehydrogenase subunit gamma [Mycobacterium tuberculosis str. H37Ra]                                                       | 69.33                 | 764               | 766                 |

|                          |         |                                                                                                                                                                     |       |     |     |
|--------------------------|---------|---------------------------------------------------------------------------------------------------------------------------------------------------------------------|-------|-----|-----|
| fig 6666666.28482.peg.9  | R013492 | (gi:145225066) nuoG (Mflv 4487) - NADH-quinone oxidoreductase, chain G<br>[Mycobacterium gilvum str. PYR-GCK]                                                       | 68.03 | 763 | 766 |
| fig 6666666.28482.peg.9  | R013491 | (gi:118467665) nuoG (MSMEG 2057) - NADH-quinone oxidoreductase, G subunit<br>[Mycobacterium smegmatis str. MC2 155]                                                 | 68.33 | 764 | 766 |
| fig 6666666.28482.peg.9  | R019206 | (gi:333991505) nuoG (JDM601 2865) - NADH dehydrogenase I (chain G) NuoG<br>(NADH- ubiquinone oxidoreductase chain G) [Mycobacterium sp. str. JDM601]                | 67.51 | 762 | 766 |
| fig 6666666.28482.peg.9  | R013496 | (gi:108798544) nuoG (Mmcs 1574) - NADH-quinone oxidoreductase, chain G<br>[Mycobacterium sp. str. MCS]                                                              | 69.35 | 764 | 766 |
| fig 6666666.28482.peg.9  | R013495 | (gi:119867644) nuoG (Mkms 1598) - NADH-quinone oxidoreductase, chain G<br>[Mycobacterium sp. str. KMS]                                                              | 69.35 | 764 | 766 |
| fig 6666666.28482.peg.9  | R013494 | (gi:126434142) nuoG (Mjls 1544) - NADH-quinone oxidoreductase, chain G<br>[Mycobacterium sp. str. JLS]                                                              | 69.48 | 764 | 766 |
| fig 6666666.28482.peg.9  | R013493 | (gi:120402877) nuoG (Mvan 1879) - NADH-quinone oxidoreductase, chain G<br>[Mycobacterium vanbaalenii str. PYR-1]                                                    | 70.28 | 763 | 766 |
| fig 6666666.28482.peg.9  | R013488 | (gi:41409305) nuoG (MAP3207) - NADH dehydrogenase gamma subunit<br>[Mycobacterium avium str. K-10 (subsp. paratuberculosis)]                                        | 68.39 | 734 | 766 |
| fig 6666666.28482.peg.9  | R019201 | (gi:169629226) nuoG (MAB 2140) - NADH dehydrogenase subunit G<br>[Mycobacterium abscessus str. ATCC 19977]                                                          | 64.33 | 762 | 766 |
| fig 6666666.28482.peg.35 | R019302 | (gi:253800166) devR/dosR (TBMG 03176) - two component system transcriptional<br>regulator devR [Mycobacterium tuberculosis str. KZN 1435]                           | 72.5  | 200 | 212 |
| fig 6666666.28482.peg.35 | R006291 | (gi:15610269) devR/dosR (Rv3133c) - TWO COMPONENT TRANSCRIPTIONAL<br>REGULATORY PROTEIN DEVR (PROBABLY LUXR/UHPA-FAMILY) [Mycobacterium<br>tuberculosis str. H37Rv] | 72.5  | 200 | 212 |
| fig 6666666.28482.peg.35 | R006292 | (gi:148662987) devR/dosR (MRA 3165) - two component transcriptional regulatory<br>protein DevR [Mycobacterium tuberculosis str. H37Ra]                              | 72.5  | 200 | 212 |
| fig 6666666.28482.peg.35 | R013509 | (gi:148824327) devR/dosR (TBFG 13154) - two component system transcriptional<br>regulatory protein devR (luxR/uhpA-family) [Mycobacterium tuberculosis str. F11]    | 72.5  | 200 | 212 |
| fig 6666666.28482.peg.35 | R006293 | (gi:15842706) devR/dosR (MT3219) - DNA-binding response regulator, LuxR family<br>[Mycobacterium tuberculosis str. CDC1551]                                         | 72.5  | 200 | 212 |
| fig 6666666.28482.peg.35 | R019301 | (gi:340628109) devR/dosR (MCAN 31471) - two component transcriptional<br>regulatory protein [Mycobacterium canettii str. CIPT 140010059]                            | 72.5  | 200 | 212 |

|                          |         |                                                                                                                                                                        |       |     |     |
|--------------------------|---------|------------------------------------------------------------------------------------------------------------------------------------------------------------------------|-------|-----|-----|
| fig 6666666.28482.peg.35 | R019303 | (gi:224991508) devR/dosR (JTY 3151) - two component transcriptional regulatory protein [Mycobacterium bovis str. BCG str. Tokyo 172]                                   | 72.5  | 200 | 212 |
| fig 6666666.28482.peg.35 | R006295 | (gi:121639016) devR/dosR (BCG 3156c) - Two component transcriptional regulatory protein devR (probably luxR/uhpA-family) [Mycobacterium bovis str. BCG Pasteur 1173P2] | 72.5  | 200 | 212 |
| fig 6666666.28482.peg.35 | R006294 | (gi:31794309) devR/dosR (Mb3157c) - TWO COMPONENT TRANSCRIPTIONAL REGULATORY PROTEIN DEVR (PROBABLY LUXR/UHPA-FAMILY) [Mycobacterium bovis str. AF2122/97]             | 72.5  | 200 | 212 |
| fig 6666666.28482.peg.35 | R019300 | (gi:339633140) devR/dosR (MAF 31410) - two component transcriptional regulatory protein DEVR (probably LUXR/UHPA-family) [Mycobacterium africanum str. GM041182]       | 72.5  | 200 | 212 |
| fig 6666666.28482.peg.35 | R019304 | (gi:333991618) devR/dosR (JDM601 2978) - two-component transcriptional regulatory protein DevR [Mycobacterium sp. str. JDM601]                                         | 72.73 | 198 | 212 |
| fig 6666666.28482.peg.35 | R006302 | (gi:120402438) devR/dosR (Mvan 1427) - two component transcriptional regulator, LuxR family [Mycobacterium vanbaalenii str. PYR-1]                                     | 71.5  | 200 | 212 |
| fig 6666666.28482.peg.35 | R006298 | (gi:118617914) devR/dosR (MUL 2423) - two component transcriptional regulatory protein DevR [Mycobacterium ulcerans str. Agy99]                                        | 72.22 | 198 | 212 |
| fig 6666666.28482.peg.35 | R019298 | (gi:183981531) devR/dosR (MMAR 1516) - two-component transcriptional regulatory protein DevR [Mycobacterium marinum str. M]                                            | 72.22 | 198 | 212 |
| fig 6666666.28482.peg.35 | R006299 | (gi:118472166) devR/dosR (MSMEG 5244) - two component transcriptional regulatory protein devr [Mycobacterium smegmatis str. MC2 155]                                   | 69.5  | 200 | 212 |
| fig 6666666.28482.peg.35 | R006307 | (gi:108801090) devR/dosR (Mmcs 4126) - two component transcriptional regulator, LuxR family [Mycobacterium sp. str. MCS]                                               | 70    | 200 | 212 |
| fig 6666666.28482.peg.35 | R006305 | (gi:119870231) devR/dosR (Mkms 4201) - two component transcriptional regulator, LuxR family [Mycobacterium sp. str. KMS]                                               | 70    | 200 | 212 |
| fig 6666666.28482.peg.35 | R006303 | (gi:126436928) devR/dosR (Mjls 4357) - two component transcriptional regulator, LuxR family [Mycobacterium sp. str. JLS]                                               | 70    | 200 | 212 |
| fig 6666666.28482.peg.35 | R006300 | (gi:145224429) devR/dosR (Mflv 3847) - two component transcriptional regulator, LuxR family [Mycobacterium gilvum str. PYR-GCK]                                        | 69    | 200 | 212 |
| fig 6666666.28482.peg.35 | R006296 | (gi:41409369) devR/dosR (MAP3271c) - hypothetical protein [Mycobacterium avium str. K-10 (subsp. paratuberculosis)]                                                    | 68.5  | 200 | 212 |
| fig 6666666.28482.peg.35 | R006297 | (gi:118466851) devR/dosR (MAV 4109) - two component transcriptional regulatory protein devr [Mycobacterium avium str. 104]                                             | 68.5  | 200 | 212 |

|                          |         |                                                                                                                                    |       |     |     |
|--------------------------|---------|------------------------------------------------------------------------------------------------------------------------------------|-------|-----|-----|
| fig 6666666.28482.peg.35 | R006308 | (gi:108798049) devR/dosR (Mmcs 1076) - two component transcriptional regulator, LuxR family [Mycobacterium sp. str. MCS]           | 67.17 | 198 | 212 |
| fig 6666666.28482.peg.35 | R006306 | (gi:119867144) devR/dosR (Mkms 1092) - two component transcriptional regulator, LuxR family [Mycobacterium sp. str. KMS]           | 67.17 | 198 | 212 |
| fig 6666666.28482.peg.35 | R006304 | (gi:126433709) devR/dosR (Mjls 1103) - two component transcriptional regulator, LuxR family [Mycobacterium sp. str. JLS]           | 67.17 | 198 | 212 |
| fig 6666666.28482.peg.35 | R006301 | (gi:120403536) devR/dosR (Mvan 2548) - two component transcriptional regulator, LuxR family [Mycobacterium vanbaalenii str. PYR-1] | 71.5  | 200 | 212 |
| fig 6666666.28482.peg.35 | R019299 | (gi:169630970) devR/dosR (MAB 3891c) - LuxR family transcriptional regulator [Mycobacterium abscessus str. ATCC 19977]             | 61.11 | 198 | 212 |
| fig 6666666.28482.peg.69 | R019011 | (gi:183983279) glnA1 (MMAR 3289) - glutamine synthetase GlnA1 [Mycobacterium marinum str. M]                                       | 87.24 | 478 | 478 |
| fig 6666666.28482.peg.69 | R005812 | (gi:118617032) glnA1 (MUL 1340) - glutamine synthetase GlnA1 [Mycobacterium ulcerans str. Agy99]                                   | 86.4  | 478 | 478 |
| fig 6666666.28482.peg.69 | R005809 | (gi:41408060) glnA1 (MAP1962) - GlnA1 [Mycobacterium avium str. K-10 (subsp. paratuberculosis)]                                    | 85.98 | 478 | 478 |
| fig 6666666.28482.peg.69 | R005810 | (gi:118464473) glnA1 (MAV 2267) - glutamine synthetase, type I [Mycobacterium avium str. 104]                                      | 85.98 | 478 | 478 |
| fig 6666666.28482.peg.69 | R019015 | (gi:253798714) glnA1 (TBMG 01760) - glutamine synthetase glnA1 [Mycobacterium tuberculosis str. KZN 1435]                          | 85.56 | 478 | 478 |
| fig 6666666.28482.peg.69 | R005804 | (gi:15609357) glnA1 (Rv2220) - GLUTAMINE SYNTHETASE GLNA1 (GLUTAMINE SYNTHASE) (GS-I) [Mycobacterium tuberculosis str. H37Rv]      | 85.56 | 478 | 478 |
| fig 6666666.28482.peg.69 | R005805 | (gi:148662038) glnA1 (MRA 2237) - glutamine synthetase [Mycobacterium tuberculosis str. H37Ra]                                     | 85.56 | 478 | 478 |
| fig 6666666.28482.peg.69 | R013457 | (gi:148823428) glnA1 (TBFG 12249) - glutamine synthetase glnA1 [Mycobacterium tuberculosis str. F11]                               | 85.56 | 478 | 478 |
| fig 6666666.28482.peg.69 | R005806 | (gi:15841712) glnA1 (MT2278) - glutamine synthetase [Mycobacterium tuberculosis str. CDC1551]                                      | 85.56 | 478 | 478 |
| fig 6666666.28482.peg.69 | R019014 | (gi:340627226) glnA1 (MCAN 22431) - glutamine synthetase GLNA1 [Mycobacterium canettii str. CIPT 140010059]                        | 85.56 | 478 | 478 |
| fig 6666666.28482.peg.69 | R019016 | (gi:224990596) glnA1 (JTY 2231) - glutamine synthetase [Mycobacterium bovis str. BCG str. Tokyo 172]                               | 85.56 | 478 | 478 |

|                          |         |                                                                                                                            |       |     |     |
|--------------------------|---------|----------------------------------------------------------------------------------------------------------------------------|-------|-----|-----|
| fig 6666666.28482.peg.69 | R005808 | (gi:121638102) glnA1 (BCG 2237) - Glutamine synthetase glnA1 [Mycobacterium bovis str. BCG Pasteur 1173P2]                 | 85.56 | 478 | 478 |
| fig 6666666.28482.peg.69 | R005807 | (gi:31793400) glnA1 (Mb2244) - GLUTAMINE SYNTHETASE GLNA1 (GLUTAMINE SYNTHASE) (GS-I) [Mycobacterium bovis str. AF2122/97] | 85.56 | 478 | 478 |
| fig 6666666.28482.peg.69 | R019013 | (gi:339632248) glnA1 (MAF 22320) - Glutamine synthetase GLNA1 (Glutamine synthase) [Mycobacterium africanum str. GM041182] | 85.56 | 478 | 478 |
| fig 6666666.28482.peg.69 | R005811 | (gi:15827444) glnA1 (ML0925) - glutamine synthase class I . [Mycobacterium leprae str. TN]                                 | 85.56 | 478 | 478 |
| fig 6666666.28482.peg.69 | R019017 | (gi:221229921) glnA1 (MLBr 00925) - glutamine synthase class I [Mycobacterium leprae str. Br4923]                          | 85.56 | 478 | 478 |
| fig 6666666.28482.peg.69 | R005815 | (gi:120404556) glnA1 (Mvan 3585) - glutamine synthetase, type I [Mycobacterium vanbaalenii str. PYR-1]                     | 82.85 | 478 | 478 |
| fig 6666666.28482.peg.69 | R005813 | (gi:118467956) glnA1 (MSMEG 4290) - glutamine synthetase, type I [Mycobacterium smegmatis str. MC2 155]                    | 82.85 | 478 | 478 |
| fig 6666666.28482.peg.69 | R005818 | (gi:108800286) glnA1 (Mmcs 3320) - glutamine synthetase, type I [Mycobacterium sp. str. MCS]                               | 82.43 | 478 | 478 |
| fig 6666666.28482.peg.69 | R005817 | (gi:119869414) glnA1 (Mkms 3382) - glutamine synthetase, type I [Mycobacterium sp. str. KMS]                               | 82.43 | 478 | 478 |
| fig 6666666.28482.peg.69 | R005816 | (gi:126435909) glnA1 (Mjls 3331) - glutamine synthetase, type I [Mycobacterium sp. str. JLS]                               | 82.43 | 478 | 478 |
| fig 6666666.28482.peg.69 | R005814 | (gi:145223515) glnA1 (Mflv 2928) - glutamine synthetase, type I [Mycobacterium gilvum str. PYR-GCK]                        | 82.01 | 478 | 478 |
| fig 6666666.28482.peg.69 | R019018 | (gi:333992818) glnA1 (JDM601 4178) - glutamine synthetase [Mycobacterium sp. str. JDM601]                                  | 81.53 | 471 | 478 |
| fig 6666666.28482.peg.69 | R019012 | (gi:169629021) glnA1 (MAB 1933c) - glutamine synthetase, type I (GlnA1) [Mycobacterium abscessus str. ATCC 19977]          | 80.13 | 478 | 478 |
| fig 6666666.28482.peg.69 | R019019 | (gi:333990322) glnA1 (JDM601 1682) - glutamine synthetase [Mycobacterium sp. str. JDM601]                                  | 78.87 | 478 | 478 |
| fig 6666666.28482.peg.94 | R018193 | (gi:119867807) Mkms1768 - hypothetical protein [Mycobacterium sp. str. KMS]                                                | 70.71 | 198 | 209 |
| fig 6666666.28482.peg.94 | R018194 | (gi:108798689) Mmcs1721 - hypothetical protein [Mycobacterium sp. str. MCS]                                                | 70.71 | 198 | 209 |

|                           |         |                                                                                                                            |       |     |     |
|---------------------------|---------|----------------------------------------------------------------------------------------------------------------------------|-------|-----|-----|
| fig 6666666.28482.peg.94  | R018192 | (gi:126434290) Mjls1700 - hypothetical protein [Mycobacterium sp. str. JLS]                                                | 70.71 | 198 | 209 |
| fig 6666666.28482.peg.94  | R018189 | (gi:118470319) MSMEG2128 - malonyl CoA decarboxylase [Mycobacterium smegmatis str. MC2 155]                                | 68.16 | 201 | 209 |
| fig 6666666.28482.peg.94  | R018186 | (gi:41409247) MAP3149c - hypothetical protein [Mycobacterium avium str. K-10 (subsp. paratuberculosis)]                    | 63.16 | 209 | 209 |
| fig 6666666.28482.peg.94  | R019127 | (gi:333990174) JDM6011533 - hypothetical protein [Mycobacterium sp. str. JDM601]                                           | 61.76 | 204 | 209 |
| fig 6666666.28482.peg.94  | R019121 | (gi:183981603) MMAR1587 - hypothetical protein [Mycobacterium marinum str. M]                                              | 64.25 | 207 | 209 |
| fig 6666666.28482.peg.94  | R018188 | (gi:118618753) MUL3447 - hypothetical protein [Mycobacterium ulcerans str. Agy99]                                          | 64.08 | 206 | 209 |
| fig 6666666.28482.peg.94  | R018190 | (gi:145224991) Mflv4412 - hypothetical protein [Mycobacterium gilvum str. PYR-GCK]                                         | 62.12 | 198 | 209 |
| fig 6666666.28482.peg.94  | R018191 | (gi:120402940) Mvan1943 - hypothetical protein [Mycobacterium vanbaalenii str. PYR-1]                                      | 63.13 | 198 | 209 |
| fig 6666666.28482.peg.266 | R005167 | (gi:108797926) cmaA2 (Mmcs 0952) - Cyclopropane-fatty-acyl-phospholipid synthase [Mycobacterium sp. str. MCS]              | 80.21 | 283 | 287 |
| fig 6666666.28482.peg.266 | R018710 | (gi:253797397) pcaA (TBMG 00472) - mycolic acid synthase PcaA [Mycobacterium tuberculosis str. KZN 1435]                   | 74.56 | 287 | 287 |
| fig 6666666.28482.peg.266 | R005144 | (gi:57116736) pcaA (Rv0470c) - MYCOLIC ACID SYNTHASE PCAA (CYCLOPROPANE SYNTHASE) [Mycobacterium tuberculosis str. H37Rv]  | 74.56 | 287 | 287 |
| fig 6666666.28482.peg.266 | R005145 | (gi:148660236) pcaA (MRA 0476) - mycolic acid synthase PcaA [Mycobacterium tuberculosis str. H37Ra]                        | 74.56 | 287 | 287 |
| fig 6666666.28482.peg.266 | R013397 | (gi:148821668) pcaA (TBF 10477) - mycolic acid synthase pcaA (cyclopropane synthase) [Mycobacterium tuberculosis str. F11] | 74.56 | 287 | 287 |
| fig 6666666.28482.peg.266 | R005146 | (gi:15839858) pcaA (MT0486) - mycolic acid synthase [Mycobacterium tuberculosis str. CDC1551]                              | 74.56 | 287 | 287 |
| fig 6666666.28482.peg.266 | R018709 | (gi:340625496) pcaA (MCAN 04691) - mycolic acid synthase PCAA [Mycobacterium canettii str. CIPT 140010059]                 | 74.56 | 287 | 287 |
| fig 6666666.28482.peg.266 | R005148 | (gi:121636385) pcaA (BCG 0510c) - Mycolic acid synthase pcaA [Mycobacterium bovis str. BCG Pasteur 1173P2]                 | 74.56 | 287 | 287 |

|                           |         |                                                                                                                                     |       |     |     |
|---------------------------|---------|-------------------------------------------------------------------------------------------------------------------------------------|-------|-----|-----|
| fig 6666666.28482.peg.266 | R005147 | (gi:31791649) <i>pcaA</i> (Mb0479c) - MYCOLIC ACID SYNTHASE PCAA (CYCLOPROPANE SYNTHASE) [Mycobacterium bovis str. AF2122/97]       | 74.56 | 287 | 287 |
| fig 6666666.28482.peg.266 | R018708 | (gi:339630539) <i>pcaA</i> (MAF 04730) - mycolic acid synthase PCAA (cyclopropane synthase) [Mycobacterium africanum str. GM041182] | 74.56 | 287 | 287 |
| fig 6666666.28482.peg.266 | R018711 | (gi:224988857) <i>pcaA</i> (JTY 0480) - mycolic acid synthase [Mycobacterium bovis str. BCG str. Tokyo 172]                         | 74.56 | 287 | 287 |
| fig 6666666.28482.peg.266 | R005152 | (gi:118619634) <i>pcaA</i> (MUL 4539) - mycolic acid synthase PcaA [Mycobacterium ulcerans str. Agy99]                              | 72.47 | 287 | 287 |
| fig 6666666.28482.peg.266 | R018707 | (gi:183980820) <i>pcaA</i> (MMAR 0796) - mycolic acid synthase PcaA [Mycobacterium marinum str. M]                                  | 72.47 | 287 | 287 |
| fig 6666666.28482.peg.266 | R005151 | (gi:15828331) <i>pcaA</i> (ML2459) - Mycolic acid synthase [Mycobacterium leprae str. TN]                                           | 73.17 | 287 | 287 |
| fig 6666666.28482.peg.266 | R018712 | (gi:221230808) <i>pcaA</i> (MLBr 02459) - Mycolic acid synthase [Mycobacterium leprae str. Br4923]                                  | 73.17 | 287 | 287 |
| fig 6666666.28482.peg.266 | R005149 | (gi:41410062) <i>pcaA</i> (MAP3964c) - UmaA2 [Mycobacterium avium str. K-10 (subsp. paratuberculosis)]                              | 73.52 | 287 | 287 |
| fig 6666666.28482.peg.266 | R005150 | (gi:118465677) <i>pcaA</i> (MAV 4679) - cyclopropane-fatty-acyl-phospholipid synthase 1 [Mycobacterium avium str. 104]              | 74.56 | 283 | 287 |
| fig 6666666.28482.peg.266 | R005157 | (gi:108799701) <i>pcaA</i> (Mmcs 2735) - Cyclopropane-fatty-acyl-phospholipid synthase [Mycobacterium sp. str. MCS]                 | 72.73 | 286 | 287 |
| fig 6666666.28482.peg.266 | R005156 | (gi:119868811) <i>pcaA</i> (Mkms 2779) - Cyclopropane-fatty-acyl-phospholipid synthase [Mycobacterium sp. str. KMS]                 | 72.73 | 286 | 287 |
| fig 6666666.28482.peg.266 | R005155 | (gi:126435345) <i>pcaA</i> (Mjls 2765) - Cyclopropane-fatty-acyl-phospholipid synthase [Mycobacterium sp. str. JLS]                 | 72.73 | 286 | 287 |
| fig 6666666.28482.peg.266 | R005153 | (gi:145223891) <i>pcaA</i> (Mflv 3304) - Cyclopropane-fatty-acyl-phospholipid synthase [Mycobacterium gilvum str. PYR-GCK]          | 71.68 | 286 | 287 |
| fig 6666666.28482.peg.266 | R005154 | (gi:120404005) <i>pcaA</i> (Mvan 3025) - Cyclopropane-fatty-acyl-phospholipid synthase [Mycobacterium vanbaalenii str. PYR-1]       | 72.03 | 286 | 287 |
| fig 6666666.28482.peg.266 | R018720 | (gi:333990669) <i>cmaA2</i> (JDM601 2029) - methoxy mycolic acid synthase [Mycobacterium sp. str. JDM601]                           | 62.98 | 284 | 287 |
| fig 6666666.28482.peg.266 | R018727 | (gi:333989305) <i>mma4</i> (JDM601 0665) - methoxy mycolic acid synthase [Mycobacterium sp. str. JDM601]                            | 61.19 | 286 | 287 |

|                           |         |                                                                                                                                          |       |     |     |
|---------------------------|---------|------------------------------------------------------------------------------------------------------------------------------------------|-------|-----|-----|
| fig 6666666.28482.peg.266 | R018713 | (gi:333989092) <i>pcaA</i> (JDM601_0452) - mycolic acid synthase PcaA [Mycobacterium sp. str. JDM601]                                    | 62.09 | 276 | 287 |
| fig 6666666.28482.peg.266 | R005165 | (gi:15828307) <i>cmaA2</i> (ML2426) - cyclopropane mycolic acid synthase [Mycobacterium leprae str. TN]                                  | 60.34 | 285 | 287 |
| fig 6666666.28482.peg.266 | R018719 | (gi:221230784) <i>cmaA2</i> (MLBr_02426) - cyclopropane mycolic acid synthase [Mycobacterium leprae str. Br4923]                         | 60.34 | 285 | 287 |
| fig 6666666.28482.peg.266 | R005175 | (gi:15828017) <i>mma4</i> (ML1903) - methyl mycolic acid synthase 4 [Mycobacterium leprae str. TN]                                       | 60.07 | 278 | 287 |
| fig 6666666.28482.peg.266 | R018726 | (gi:221230494) <i>mma4</i> (MLBr_01903) - methyl mycolic acid synthase 4 [Mycobacterium leprae str. Br4923]                              | 60.07 | 278 | 287 |
| fig 6666666.28482.peg.267 | R005167 | (gi:108797926) <i>cmaA2</i> (Mmcs_0952) - Cyclopropane-fatty-acyl-phospholipid synthase [Mycobacterium sp. str. MCS]                     | 66.9  | 284 | 293 |
| fig 6666666.28482.peg.267 | R005152 | (gi:118619634) <i>pcaA</i> (MUL_4539) - mycolic acid synthase PcaA [Mycobacterium ulcerans str. Agy99]                                   | 65.71 | 280 | 293 |
| fig 6666666.28482.peg.267 | R018707 | (gi:183980820) <i>pcaA</i> (MMAR_0796) - mycolic acid synthase PcaA [Mycobacterium marinum str. M]                                       | 65.71 | 280 | 293 |
| fig 6666666.28482.peg.267 | R005157 | (gi:108799701) <i>pcaA</i> (Mmcs_2735) - Cyclopropane-fatty-acyl-phospholipid synthase [Mycobacterium sp. str. MCS]                      | 61.77 | 293 | 293 |
| fig 6666666.28482.peg.267 | R005156 | (gi:119868811) <i>pcaA</i> (Mkms_2779) - Cyclopropane-fatty-acyl-phospholipid synthase [Mycobacterium sp. str. KMS]                      | 61.77 | 293 | 293 |
| fig 6666666.28482.peg.267 | R005155 | (gi:126435345) <i>pcaA</i> (Mjls_2765) - Cyclopropane-fatty-acyl-phospholipid synthase [Mycobacterium sp. str. JLS]                      | 61.77 | 293 | 293 |
| fig 6666666.28482.peg.267 | R018710 | (gi:253797397) <i>pcaA</i> (TBMG_00472) - mycolic acid synthase PcaA [Mycobacterium tuberculosis str. KZN_1435]                          | 64.29 | 280 | 293 |
| fig 6666666.28482.peg.267 | R005144 | (gi:57116736) <i>pcaA</i> (Rv0470c) - MYCOLIC ACID SYNTHASE PCAA (CYCLOPROPANE SYNTHASE) [Mycobacterium tuberculosis str. H37Rv]         | 64.29 | 280 | 293 |
| fig 6666666.28482.peg.267 | R005145 | (gi:148660236) <i>pcaA</i> (MRA_0476) - mycolic acid synthase PcaA [Mycobacterium tuberculosis str. H37Ra]                               | 64.29 | 280 | 293 |
| fig 6666666.28482.peg.267 | R013397 | (gi:148821668) <i>pcaA</i> (TBF_10477) - mycolic acid synthase <i>pcaA</i> (cyclopropane synthase) [Mycobacterium tuberculosis str. F11] | 64.29 | 280 | 293 |
| fig 6666666.28482.peg.267 | R005146 | (gi:15839858) <i>pcaA</i> (MT0486) - mycolic acid synthase [Mycobacterium tuberculosis str. CDC1551]                                     | 64.29 | 280 | 293 |



|                           |         |                                                                                                                                                                                             |       |     |     |
|---------------------------|---------|---------------------------------------------------------------------------------------------------------------------------------------------------------------------------------------------|-------|-----|-----|
| fig 6666666.28482.peg.267 | R018709 | (gi:340625496) <i>pcaA</i> (MCAN 04691) - mycolic acid synthase PCAA [Mycobacterium canettii str. CIPT 140010059]                                                                           | 64.29 | 280 | 293 |
| fig 6666666.28482.peg.267 | R005148 | (gi:121636385) <i>pcaA</i> (BCG 0510c) - Mycolic acid synthase <i>pcaA</i> [Mycobacterium bovis str. BCG Pasteur 1173P2]                                                                    | 64.29 | 280 | 293 |
| fig 6666666.28482.peg.267 | R005147 | (gi:31791649) <i>pcaA</i> (Mb0479c) - MYCOLIC ACID SYNTHASE PCAA (CYCLOPROPANE SYNTHASE) [Mycobacterium bovis str. AF2122/97]                                                               | 64.29 | 280 | 293 |
| fig 6666666.28482.peg.267 | R018708 | (gi:339630539) <i>pcaA</i> (MAF 04730) - mycolic acid synthase PCAA (cyclopropane synthase) [Mycobacterium africanum str. GM041182]                                                         | 64.29 | 280 | 293 |
| fig 6666666.28482.peg.267 | R018711 | (gi:224988857) <i>pcaA</i> (JTY 0480) - mycolic acid synthase [Mycobacterium bovis str. BCG str. Tokyo 172]                                                                                 | 64.29 | 280 | 293 |
| fig 6666666.28482.peg.267 | R005153 | (gi:145223891) <i>pcaA</i> (Mflv 3304) - Cyclopropane-fatty-acyl-phospholipid synthase [Mycobacterium gilvum str. PYR-GCK]                                                                  | 60.75 | 293 | 293 |
| fig 6666666.28482.peg.267 | R005151 | (gi:15828331) <i>pcaA</i> (ML2459) - Mycolic acid synthase [Mycobacterium leprae str. TN]                                                                                                   | 65.36 | 280 | 293 |
| fig 6666666.28482.peg.267 | R018712 | (gi:221230808) <i>pcaA</i> (MLBr 02459) - Mycolic acid synthase [Mycobacterium leprae str. Br4923]                                                                                          | 65.36 | 280 | 293 |
| fig 6666666.28482.peg.267 | R005150 | (gi:118465677) <i>pcaA</i> (MAV 4679) - cyclopropane-fatty-acyl-phospholipid synthase 1 [Mycobacterium avium str. 104]                                                                      | 63.21 | 280 | 293 |
| fig 6666666.28482.peg.267 | R005149 | (gi:41410062) <i>pcaA</i> (MAP3964c) - UmaA2 [Mycobacterium avium str. K-10 (subsp. paratuberculosis)]                                                                                      | 62.86 | 280 | 293 |
| fig 6666666.28482.peg.268 | R018721 | (gi:183980997) <i>mma4</i> (MMAR 0977) - methoxy mycolic acid synthase 4, MmaA4 [Mycobacterium marinum str. M]                                                                              | 87.29 | 298 | 299 |
| fig 6666666.28482.peg.268 | R005168 | (gi:15607782) <i>mma4</i> (Rv0642c) - METHOXY MYCOLIC ACID SYNTHASE 4 MMAA4 (METHYL MYCOLIC ACID SYNTHASE 4) (MMA4) (HYDROXY MYCOLIC ACID SYNTHASE) [Mycobacterium tuberculosis str. H37Rv] | 85.57 | 297 | 299 |
| fig 6666666.28482.peg.268 | R005169 | (gi:148660416) <i>mma4</i> (MRA 0653) - methoxy mycolic acid synthase 4 [Mycobacterium tuberculosis str. H37Ra]                                                                             | 85.57 | 297 | 299 |
| fig 6666666.28482.peg.268 | R018723 | (gi:340625661) <i>mma4</i> (MCAN 06411) - methoxy mycolic acid synthase 4 MMAA4 [Mycobacterium canettii str. CIPT 140010059]                                                                | 85.57 | 297 | 299 |
| fig 6666666.28482.peg.268 | R013399 | (gi:148821846) <i>mma4</i> (TBFG 10655) - methoxy mycolic acid synthase 4 <i>mmaA4</i> [Mycobacterium tuberculosis str. F11]                                                                | 85.57 | 297 | 299 |
| fig 6666666.28482.peg.268 | R005170 | (gi:15840045) <i>mma4</i> (MT0670) - methoxy mycolic acid synthase 4 [Mycobacterium tuberculosis str. CDC1551]                                                                              | 85.57 | 297 | 299 |

|                           |         |                                                                                                                                                                                   |       |     |     |
|---------------------------|---------|-----------------------------------------------------------------------------------------------------------------------------------------------------------------------------------|-------|-----|-----|
| fig 6666666.28482.peg.268 | R018724 | (gi:253797582) mma4 (TBMG 00653) - methoxy mycolic acid synthase 4 mmaA4 [Mycobacterium tuberculosis str. KZN 1435]                                                               | 85.57 | 297 | 299 |
| fig 6666666.28482.peg.268 | R018725 | (gi:224989035) mma4 (JTY 0661) - methoxy mycolic acid synthase 4 [Mycobacterium bovis str. BCG str. Tokyo 172]                                                                    | 85.57 | 297 | 299 |
| fig 6666666.28482.peg.268 | R005172 | (gi:121636563) mma4 (BCG 0691c) - Methoxy mycolic acid synthase 4 mmaA4 [Mycobacterium bovis str. BCG Pasteur 1173P2]                                                             | 85.57 | 297 | 299 |
| fig 6666666.28482.peg.268 | R005171 | (gi:31791826) mma4 (Mb0661c) - METHOXY MYCOLIC ACID SYNTHASE 4 MMAA4 (METHYL MYCOLIC ACID SYNTHASE 4) (MMA4) (HYDROXY MYCOLIC ACID SYNTHASE) [Mycobacterium bovis str. AF2122/97] | 85.57 | 297 | 299 |
| fig 6666666.28482.peg.268 | R018722 | (gi:339630712) mma4 (MAF 06510) - methoxy mycolic acid synthase 4 MMAA4 (methyl mycolic acid synthase 4) [Mycobacterium africanum str. GM041182]                                  | 85.57 | 297 | 299 |
| fig 6666666.28482.peg.268 | R005176 | (gi:118616517) mma4 (MUL 0729) - methoxy mycolic acid synthase 4, MmaA4 [Mycobacterium ulcerans str. Agy99]                                                                       | 86.29 | 298 | 299 |
| fig 6666666.28482.peg.268 | R005173 | (gi:41410214) mma4 (MAP4116c) - MmaA4 [Mycobacterium avium str. K-10 (subsp. paratuberculosis)]                                                                                   | 84.9  | 297 | 299 |
| fig 6666666.28482.peg.268 | R005174 | (gi:118466420) mma4 (MAV 4517) - cyclopropane-fatty-acyl-phospholipid synthase 1 [Mycobacterium avium str. 104]                                                                   | 84.56 | 297 | 299 |
| fig 6666666.28482.peg.268 | R005175 | (gi:15828017) mma4 (ML1903) - methyl mycolic acid synthase 4 [Mycobacterium leprae str. TN]                                                                                       | 83.16 | 296 | 299 |
| fig 6666666.28482.peg.268 | R018726 | (gi:221230494) mma4 (MLBr 01903) - methyl mycolic acid synthase 4 [Mycobacterium leprae str. Br4923]                                                                              | 83.16 | 296 | 299 |
| fig 6666666.28482.peg.268 | R018727 | (gi:333989305) mma4 (JDM601 0665) - methoxy mycolic acid synthase [Mycobacterium sp. str. JDM601]                                                                                 | 79.08 | 282 | 299 |
| fig 6666666.28482.peg.268 | R005178 | (gi:120402251) mma4 (Mvan 1239) - Cyclopropane-fatty-acyl-phospholipid synthase [Mycobacterium vanbaalenii str. PYR-1]                                                            | 70.81 | 297 | 299 |
| fig 6666666.28482.peg.268 | R005177 | (gi:145225689) mma4 (Mflv 5113) - Cyclopropane-fatty-acyl-phospholipid synthase [Mycobacterium gilvum str. PYR-GCK]                                                               | 69.9  | 298 | 299 |
| fig 6666666.28482.peg.268 | R005181 | (gi:108797925) mma4 (Mmcs 0951) - Cyclopropane-fatty-acyl-phospholipid synthase [Mycobacterium sp. str. MCS]                                                                      | 69.97 | 293 | 299 |
| fig 6666666.28482.peg.268 | R005180 | (gi:119867021) mma4 (Mkms 0969) - Cyclopropane-fatty-acyl-phospholipid synthase [Mycobacterium sp. str. KMS]                                                                      | 69.97 | 293 | 299 |

|                           |         |                                                                                                                |       |     |     |
|---------------------------|---------|----------------------------------------------------------------------------------------------------------------|-------|-----|-----|
| fig 6666666.28482.peg.268 | R005179 | (gi:126433581) mma4 (Mjls 0972) - Cyclopropane-fatty-acyl-phospholipid synthase [Mycobacterium sp. str. JLS]   | 69.97 | 293 | 299 |
| fig 6666666.28482.peg.290 | R006470 | (gi:41410187) mce2F (MAP4089) - hypothetical protein [Mycobacterium avium str. K-10 (subsp. paratuberculosis)] | 85.63 | 515 | 516 |
| fig 6666666.28482.peg.290 | R006471 | (gi:118463921) mce2F (MAV 4546) - mce-family protein mce2f [Mycobacterium avium str. 104]                      | 85.71 | 511 | 516 |
| fig 6666666.28482.peg.290 | R019385 | (gi:253797529) mce2F (TBMG 00602) - MCE-family protein mce2F [Mycobacterium tuberculosis str. KZN 1435]        | 80.43 | 516 | 516 |
| fig 6666666.28482.peg.290 | R006465 | (gi:15607734) mce2F (Rv0594) - MCE-FAMILY PROTEIN MCE2F [Mycobacterium tuberculosis str. H37Rv]                | 80.43 | 516 | 516 |
| fig 6666666.28482.peg.290 | R006466 | (gi:148660364) mce2F (MRA 0602) - MCE-family protein Mce2F [Mycobacterium tuberculosis str. H37Ra]             | 80.43 | 516 | 516 |
| fig 6666666.28482.peg.290 | R013523 | (gi:148821797) mce2F (TBFG 10606) - MCE-family protein mce2F [Mycobacterium tuberculosis str. F11]             | 80.43 | 516 | 516 |
| fig 6666666.28482.peg.290 | R006467 | (gi:15839997) mce2F (MT0624) - virulence factor mce family protein [Mycobacterium tuberculosis str. CDC1551]   | 80.43 | 516 | 516 |
| fig 6666666.28482.peg.290 | R019386 | (gi:224988984) mce2F (JTY 0609) - MCE-family protein [Mycobacterium bovis str. BCG str. Tokyo 172]             | 80.43 | 516 | 516 |
| fig 6666666.28482.peg.290 | R006469 | (gi:121636512) mce2F (BCG 0640) - mce-family protein mce2F [Mycobacterium bovis str. BCG Pasteur 1173P2]       | 80.43 | 516 | 516 |
| fig 6666666.28482.peg.290 | R006468 | (gi:31791776) mce2F (Mb0610) - MCE-FAMILY PROTEIN MCE2F [Mycobacterium bovis str. AF2122/97]                   | 80.43 | 516 | 516 |
| fig 6666666.28482.peg.290 | R019383 | (gi:339630662) mce2F (MAF 06010) - MCE-family protein MCE2F [Mycobacterium africanum str. GM041182]            | 80.43 | 516 | 516 |
| fig 6666666.28482.peg.290 | R019384 | (gi:340625624) mce2F (MCAN 06001) - MCE-family protein MCE2F [Mycobacterium canettii str. CIPT 140010059]      | 80.23 | 516 | 516 |
| fig 6666666.28482.peg.290 | R006399 | (gi:41409707) mce1F (MAP3609) - hypothetical protein [Mycobacterium avium str. K-10 (subsp. paratuberculosis)] | 70.6  | 516 | 516 |
| fig 6666666.28482.peg.290 | R006401 | (gi:15828398) mce1F (ML2594) - putative secreted protein [Mycobacterium leprae str. TN]                        | 67.12 | 516 | 516 |
| fig 6666666.28482.peg.290 | R019360 | (gi:221230875) mce1F (MLBr 02594) - putative secreted protein [Mycobacterium leprae str. Br4923]               | 67.12 | 516 | 516 |

|                           |         |                                                                                                              |       |     |     |
|---------------------------|---------|--------------------------------------------------------------------------------------------------------------|-------|-----|-----|
| fig 6666666.28482.peg.290 | R019357 | (gi:340625211) mce1F (MCAN 01801) - MCE-family protein MCE1F [Mycobacterium canettii str. CIPT 140010059]    | 70.29 | 515 | 516 |
| fig 6666666.28482.peg.290 | R019358 | (gi:253797096) mce1F (TBMG 00175) - MCE-family protein mce1F [Mycobacterium tuberculosis str. KZN 1435]      | 70.1  | 515 | 516 |
| fig 6666666.28482.peg.290 | R013517 | (gi:148821366) mce1F (TBFG 10175) - MCE-family protein mce1F [Mycobacterium tuberculosis str. F11]           | 70.1  | 515 | 516 |
| fig 6666666.28482.peg.290 | R006396 | (gi:15839552) mce1F (MT0183) - virulence factor mce family protein [Mycobacterium tuberculosis str. CDC1551] | 70.1  | 515 | 516 |
| fig 6666666.28482.peg.290 | R019359 | (gi:224988559) mce1F (JTY 0180) - MCE-family protein [Mycobacterium bovis str. BCG str. Tokyo 172]           | 70.1  | 515 | 516 |
| fig 6666666.28482.peg.290 | R006398 | (gi:121636086) mce1F (BCG 0211) - MCE-family protein mce1F [Mycobacterium bovis str. BCG Pasteur 1173P2]     | 70.1  | 515 | 516 |
| fig 6666666.28482.peg.290 | R006397 | (gi:31791352) mce1F (Mb0180) - MCE-FAMILY PROTEIN MCE1F [Mycobacterium bovis str. AF2122/97]                 | 70.1  | 515 | 516 |
| fig 6666666.28482.peg.290 | R019356 | (gi:339630255) mce1F (MAF 01750) - MCE-family protein MCE1F [Mycobacterium africanum str. GM041182]          | 70.1  | 515 | 516 |
| fig 6666666.28482.peg.290 | R006394 | (gi:15607315) mce1F (Rv0174) - MCE-FAMILY PROTEIN MCE1F [Mycobacterium tuberculosis str. H37Rv]              | 69.9  | 515 | 516 |
| fig 6666666.28482.peg.290 | R006395 | (gi:148659938) mce1F (MRA 0182) - MCE-family protein Mce1F [Mycobacterium tuberculosis str. H37Ra]           | 69.9  | 515 | 516 |
| fig 6666666.28482.peg.290 | R019355 | (gi:183980448) mce1F (MMAR 0417) - MCE-family protein Mce1F [Mycobacterium marinum str. M]                   | 68.59 | 516 | 516 |
| fig 6666666.28482.peg.290 | R006402 | (gi:118616800) mce1F (MUL 1067) - MCE-family protein Mce1F [Mycobacterium ulcerans str. Agy99]               | 68.4  | 516 | 516 |
| fig 6666666.28482.peg.290 | R006474 | (gi:126432726) mce2F (Mjls 0113) - virulence factor Mce family protein [Mycobacterium sp. str. JLS]          | 67.12 | 515 | 516 |
| fig 6666666.28482.peg.290 | R006476 | (gi:108797103) mce2F (Mmcs 0123) - Mammalian cell entry [Mycobacterium sp. str. MCS]                         | 66.73 | 515 | 516 |
| fig 6666666.28482.peg.290 | R006475 | (gi:119866188) mce2F (Mkms 0132) - virulence factor Mce family protein [Mycobacterium sp. str. KMS]          | 66.73 | 515 | 516 |
| fig 6666666.28482.peg.290 | R006403 | (gi:118473635) mce1F (MSMEG 0139) - mce-family protein mce1f [Mycobacterium smegmatis str. MC2 155]          | 65.07 | 515 | 516 |

|                           |         |                                                                                                                                                |       |     |     |
|---------------------------|---------|------------------------------------------------------------------------------------------------------------------------------------------------|-------|-----|-----|
| fig 6666666.28482.peg.290 | R006472 | (gi:145221301) mce2F (Mflv 0706) - virulence factor Mce family protein [Mycobacterium gilvum str. PYR-GCK]                                     | 64.69 | 516 | 516 |
| fig 6666666.28482.peg.290 | R006473 | (gi:120401167) mce2F (Mvan 0139) - virulence factor Mce family protein [Mycobacterium vanbaalenii str. PYR-1]                                  | 64.5  | 516 | 516 |
| fig 6666666.28482.peg.290 | R019361 | (gi:333988767) mce1F (JDM601 0127) - MCE-family protein Mce1F [Mycobacterium sp. str. JDM601]                                                  | 61.44 | 514 | 516 |
| fig 6666666.28482.peg.290 | R006400 | (gi:118462429) mce1F (MAV 5010) - mce-family protein mce1f [Mycobacterium avium str. 104]                                                      | 72.61 | 313 | 516 |
| fig 6666666.28482.peg.291 | R019380 | (gi:340625623) mce2E (MCAN 05991) - putative MCE-family lipoprotein LPRL [Mycobacterium canettii str. CIPT 140010059]                          | 81.05 | 380 | 380 |
| fig 6666666.28482.peg.291 | R019381 | (gi:253797528) mce2E (TBMG 00601) - MCE-family lipoprotein mce2E [Mycobacterium tuberculosis str. KZN 1435]                                    | 80.79 | 380 | 380 |
| fig 6666666.28482.peg.291 | R006453 | (gi:15607733) mce2E (Rv0593) - POSSIBLE MCE-FAMILY LIPOPROTEIN LPRL (MCE-FAMILY LIPOPROTEIN MCE2E) [Mycobacterium tuberculosis str. H37Rv]     | 80.79 | 380 | 380 |
| fig 6666666.28482.peg.291 | R006454 | (gi:148660363) mce2E (MRA 0601) - MCE-family lipoprotein LprL [Mycobacterium tuberculosis str. H37Ra]                                          | 80.79 | 380 | 380 |
| fig 6666666.28482.peg.291 | R013522 | (gi:148821796) mce2E (TBFG 10605) - MCE-family lipoprotein lprL (MCE-family lipoprotein mce2e) [Mycobacterium tuberculosis str. F11]           | 80.79 | 380 | 380 |
| fig 6666666.28482.peg.291 | R006455 | (gi:15839996) mce2E (MT0623) - virulence factor mce family protein [Mycobacterium tuberculosis str. CDC1551]                                   | 80.79 | 380 | 380 |
| fig 6666666.28482.peg.291 | R019382 | (gi:224988983) mce2E (JTY 0608) - putative MCE-family lipoprotein [Mycobacterium bovis str. BCG str. Tokyo 172]                                | 80.79 | 380 | 380 |
| fig 6666666.28482.peg.291 | R006457 | (gi:121636511) mce2E (BCG 0639) - putative mce-family lipoprotein lprL [Mycobacterium bovis str. BCG Pasteur 1173P2]                           | 80.79 | 380 | 380 |
| fig 6666666.28482.peg.291 | R019379 | (gi:339630661) mce2E (MAF 06000) - putative MCE-family lipoprotein LPRL (MCE-family lipoprotein MCE2E) [Mycobacterium africanum str. GM041182] | 80.79 | 380 | 380 |
| fig 6666666.28482.peg.291 | R006459 | (gi:118462367) mce2E (MAV 4547) - virulence factor Mce family protein [Mycobacterium avium str. 104]                                           | 81.48 | 378 | 380 |
| fig 6666666.28482.peg.291 | R006458 | (gi:41410186) mce2E (MAP4088) - LprL [Mycobacterium avium str. K-10 (subsp. paratuberculosis)]                                                 | 80.69 | 378 | 380 |

|                           |         |                                                                                                                                                     |       |     |     |
|---------------------------|---------|-----------------------------------------------------------------------------------------------------------------------------------------------------|-------|-----|-----|
| fig 6666666.28482.peg.291 | R006460 | (gi:145221302) mce2E (Mflv 0707) - virulence factor Mce family protein [Mycobacterium gilvum str. PYR-GCK]                                          | 67.5  | 359 | 380 |
| fig 6666666.28482.peg.291 | R006461 | (gi:120401166) mce2E (Mvan 0138) - virulence factor Mce family protein [Mycobacterium vanbaalenii str. PYR-1]                                       | 67.69 | 358 | 380 |
| fig 6666666.28482.peg.291 | R006393 | (gi:118472695) mce1E (MSMEG 0138) - virulence factor Mce family protein [Mycobacterium smegmatis str. MC2 155]                                      | 67.5  | 359 | 380 |
| fig 6666666.28482.peg.291 | R006389 | (gi:41409706) mce1E (MAP3608) - LprK [Mycobacterium avium str. K-10 (subsp. paratuberculosis)]                                                      | 61.05 | 380 | 380 |
| fig 6666666.28482.peg.291 | R006464 | (gi:108797102) mce2E (Mmcs 0122) - Mammalian cell entry [Mycobacterium sp. str. MCS]                                                                | 68.06 | 359 | 380 |
| fig 6666666.28482.peg.291 | R006463 | (gi:119866187) mce2E (Mkms 0131) - virulence factor Mce family protein [Mycobacterium sp. str. KMS]                                                 | 68.06 | 359 | 380 |
| fig 6666666.28482.peg.291 | R006462 | (gi:126432725) mce2E (Mjls 0112) - virulence factor Mce family protein [Mycobacterium sp. str. JLS]                                                 | 68.33 | 359 | 380 |
| fig 6666666.28482.peg.291 | R006390 | (gi:118466982) mce1E (MAV 5011) - virulence factor Mce family protein [Mycobacterium avium str. 104]                                                | 61.05 | 380 | 380 |
| fig 6666666.28482.peg.291 | R019350 | (gi:340625210) mce1E (MCAN 01791) - putative MCE-family lipoprotein LPRK [Mycobacterium canettii str. CIPT 140010059]                               | 64.53 | 358 | 380 |
| fig 6666666.28482.peg.291 | R019348 | (gi:183980447) mce1E (MMAR 0416) - MCE family lipoprotein LprK [Mycobacterium marinum str. M]                                                       | 62.4  | 359 | 380 |
| fig 6666666.28482.peg.291 | R006384 | (gi:15607314) mce1E (Rv0173) - POSSIBLE MCE-FAMILY LIPOPROTEIN LPRK (MCE-FAMILY LIPOPROTEIN MCE1E) [Mycobacterium tuberculosis str. H37Rv]          | 64.53 | 358 | 380 |
| fig 6666666.28482.peg.291 | R006385 | (gi:148659937) mce1E (MRA 0181) - MCE-family lipoprotein LprK [Mycobacterium tuberculosis str. H37Ra]                                               | 64.53 | 358 | 380 |
| fig 6666666.28482.peg.291 | R013516 | (gi:148821365) mce1E (TBFG 10174) - MCE-family lipoprotein lprK (MCE-family lipoprotein mce1e) [Mycobacterium tuberculosis str. F11]                | 64.53 | 358 | 380 |
| fig 6666666.28482.peg.291 | R019352 | (gi:224988558) mce1E (JTY 0179) - putative MCE-family lipoprotein mce1E [Mycobacterium bovis str. BCG str. Tokyo 172]                               | 64.53 | 358 | 380 |
| fig 6666666.28482.peg.291 | R006388 | (gi:121636085) mce1E (BCG 0210) - putative mce-family lipoprotein lprK (MCE-family lipoprotein mce1E) [Mycobacterium bovis str. BCG Pasteur 1173P2] | 64.53 | 358 | 380 |

|                           |         |                                                                                                                                                |       |     |     |
|---------------------------|---------|------------------------------------------------------------------------------------------------------------------------------------------------|-------|-----|-----|
| fig 6666666.28482.peg.291 | R006387 | (gi:31791351) mce1E (Mb0179) - POSSIBLE MCE-FAMILY LIPOPROTEIN LPRK (MCE-FAMILY LIPOPROTEIN MCE1E) [Mycobacterium bovis str. AF2122/97]        | 64.53 | 358 | 380 |
| fig 6666666.28482.peg.291 | R019349 | (gi:339630254) mce1E (MAF 01740) - putative MCE-family lipoprotein LprK (MCE-family lipoprotein Mce1E) [Mycobacterium africanum str. GM041182] | 64.53 | 358 | 380 |
| fig 6666666.28482.peg.291 | R019351 | (gi:253797095) mce1E (TBMG 00174) - MCE-family lipoprotein mce1E [Mycobacterium tuberculosis str. KZN 1435]                                    | 64.53 | 358 | 380 |
| fig 6666666.28482.peg.291 | R006386 | (gi:15839551) mce1E (MT0182) - virulence factor mce family protein [Mycobacterium tuberculosis str. CDC1551]                                   | 64.53 | 358 | 380 |
| fig 6666666.28482.peg.291 | R006392 | (gi:118616799) mce1E (MUL 1066) - MCE-family lipoprotein LprK (MCE-family lipoprotein Mce1E) [Mycobacterium ulcerans str. Agy99]               | 62.12 | 359 | 380 |
| fig 6666666.28482.peg.291 | R006391 | (gi:15828397) mce1E (ML2593) - putative lipoprotein [Mycobacterium leprae str. TN]                                                             | 60.17 | 359 | 380 |
| fig 6666666.28482.peg.291 | R019353 | (gi:221230874) mce1E (MLBr 02593) - putative lipoprotein [Mycobacterium leprae str. Br4923]                                                    | 60.17 | 359 | 380 |
| fig 6666666.28482.peg.292 | R006446 | (gi:41410185) mce2D (MAP4087) - hypothetical protein [Mycobacterium avium str. K-10 (subsp. paratuberculosis)]                                 | 87.73 | 481 | 485 |
| fig 6666666.28482.peg.292 | R006447 | (gi:118464414) mce2D (MAV 4548) - virulence factor mce family protein [Mycobacterium avium str. 104]                                           | 87.32 | 481 | 485 |
| fig 6666666.28482.peg.292 | R019377 | (gi:253797527) mce2D (TBMG 00600) - MCE-family protein mce2D [Mycobacterium tuberculosis str. KZN 1435]                                        | 84.2  | 481 | 485 |
| fig 6666666.28482.peg.292 | R006441 | (gi:15607732) mce2D (Rv0592) - MCE-FAMILY PROTEIN MCE2D [Mycobacterium tuberculosis str. H37Rv]                                                | 84.2  | 481 | 485 |
| fig 6666666.28482.peg.292 | R006442 | (gi:148660362) mce2D (MRA 0600) - MCE-family protein Mce2D [Mycobacterium tuberculosis str. H37Ra]                                             | 84.2  | 481 | 485 |
| fig 6666666.28482.peg.292 | R013521 | (gi:148821795) mce2D (TBF 10604) - MCE-family protein mce2D [Mycobacterium tuberculosis str. F11]                                              | 84.2  | 481 | 485 |
| fig 6666666.28482.peg.292 | R006443 | (gi:15839995) mce2D (MT0622) - virulence factor mce family protein [Mycobacterium tuberculosis str. CDC1551]                                   | 84.2  | 481 | 485 |
| fig 6666666.28482.peg.292 | R019376 | (gi:340625622) mce2D (MCAN 05981) - MCE-family protein MCE2D [Mycobacterium canettii str. CIPT 140010059]                                      | 84.2  | 481 | 485 |
| fig 6666666.28482.peg.292 | R019375 | (gi:339630660) mce2D (MAF 05990) - MCE-family protein MCE2D [Mycobacterium africanum str. GM041182]                                            | 84.2  | 481 | 485 |

|                           |         |                                                                                                                 |       |     |     |
|---------------------------|---------|-----------------------------------------------------------------------------------------------------------------|-------|-----|-----|
| fig 6666666.28482.peg.292 | R006444 | (gi:31791774) mce2D (Mb0607) - MCE-FAMILY PROTEIN MCE2DA [FIRST PART]<br>[Mycobacterium bovis str. AF2122/97]   | 83.01 | 471 | 485 |
| fig 6666666.28482.peg.292 | R019378 | (gi:224988982) mce2D (JTY 0607) - MCE-family protein [Mycobacterium bovis str. BCG str. Tokyo 172]              | 83.66 | 465 | 485 |
| fig 6666666.28482.peg.292 | R006445 | (gi:121636510) mce2D (BCG 0637) - mce-family protein mce2Da [Mycobacterium bovis str. BCG Pasteur 1173P2]       | 83.66 | 465 | 485 |
| fig 6666666.28482.peg.292 | R019343 | (gi:340625209) mce1D (MCAN 01781) - MCE-family protein MCE1D<br>[Mycobacterium canettii str. CIPT 140010059]    | 67.57 | 480 | 485 |
| fig 6666666.28482.peg.292 | R006374 | (gi:15607313) mce1D (Rv0172) - MCE-FAMILY PROTEIN MCE1D [Mycobacterium tuberculosis str. H37Rv]                 | 67.36 | 480 | 485 |
| fig 6666666.28482.peg.292 | R006375 | (gi:148659936) mce1D (MRA 0180) - MCE-family protein Mce1D [Mycobacterium tuberculosis str. H37Ra]              | 67.36 | 480 | 485 |
| fig 6666666.28482.peg.292 | R006376 | (gi:15839550) mce1D (MT0181) - virulence factor mce family protein<br>[Mycobacterium tuberculosis str. CDC1551] | 67.36 | 480 | 485 |
| fig 6666666.28482.peg.292 | R019345 | (gi:224988557) mce1D (JTY 0178) - MCE-family protein [Mycobacterium bovis str. BCG str. Tokyo 172]              | 67.36 | 480 | 485 |
| fig 6666666.28482.peg.292 | R006378 | (gi:121636084) mce1D (BCG 0209) - MCE-family protein mce1D [Mycobacterium bovis str. BCG Pasteur 1173P2]        | 67.36 | 480 | 485 |
| fig 6666666.28482.peg.292 | R006377 | (gi:31791350) mce1D (Mb0178) - MCE-FAMILY PROTEIN MCE1D [Mycobacterium bovis str. AF2122/97]                    | 67.36 | 480 | 485 |
| fig 6666666.28482.peg.292 | R019342 | (gi:339630253) mce1D (MAF 01730) - MCE-family protein MCE1D [Mycobacterium africanum str. GM041182]             | 67.36 | 480 | 485 |
| fig 6666666.28482.peg.292 | R019344 | (gi:253797094) mce1D (TBMG 00173) - MCE-family protein mce1D [Mycobacterium tuberculosis str. KZN 1435]         | 67.15 | 480 | 485 |
| fig 6666666.28482.peg.292 | R013515 | (gi:148821364) mce1D (TBFG 10173) - MCE-family protein mce1D [Mycobacterium tuberculosis str. F11]              | 67.15 | 480 | 485 |
| fig 6666666.28482.peg.292 | R006452 | (gi:108797101) mce2D (Mmcs 0121) - Mammalian cell entry [Mycobacterium sp. str. MCS]                            | 66.6  | 480 | 485 |
| fig 6666666.28482.peg.292 | R006451 | (gi:119866186) mce2D (Mkms 0130) - virulence factor Mce family protein<br>[Mycobacterium sp. str. KMS]          | 66.6  | 480 | 485 |
| fig 6666666.28482.peg.292 | R006450 | (gi:126432724) mce2D (Mjls 0111) - virulence factor Mce family protein<br>[Mycobacterium sp. str. JLS]          | 66.6  | 480 | 485 |



|                           |         |                                                                                                                |       |     |     |
|---------------------------|---------|----------------------------------------------------------------------------------------------------------------|-------|-----|-----|
| fig 6666666.28482.peg.292 | R019341 | (gi:183980446) mce1D (MMAR 0415) - MCE-family protein Mce1D [Mycobacterium marinum str. M]                     | 65.7  | 480 | 485 |
| fig 6666666.28482.peg.292 | R006379 | (gi:41409705) mce1D (MAP3607) - hypothetical protein [Mycobacterium avium str. K-10 (subsp. paratuberculosis)] | 66.53 | 481 | 485 |
| fig 6666666.28482.peg.292 | R006380 | (gi:118466487) mce1D (MAV 5012) - mce-family protein mce1d [Mycobacterium avium str. 104]                      | 66.32 | 481 | 485 |
| fig 6666666.28482.peg.292 | R006382 | (gi:118616798) mce1D (MUL 1065) - MCE-family protein Mce1D [Mycobacterium ulcerans str. Agy99]                 | 65.28 | 480 | 485 |
| fig 6666666.28482.peg.292 | R006449 | (gi:120401165) mce2D (Mvan 0137) - virulence factor Mce family protein [Mycobacterium vanbaalenii str. PYR-1]  | 65.31 | 481 | 485 |
| fig 6666666.28482.peg.292 | R006448 | (gi:145221303) mce2D (Mflv 0708) - virulence factor Mce family protein [Mycobacterium gilvum str. PYR-GCK]     | 65.44 | 481 | 485 |
| fig 6666666.28482.peg.292 | R006383 | (gi:118471615) mce1D (MSMEG 0137) - virulence factor mce family protein [Mycobacterium smegmatis str. MC2 155] | 63.21 | 481 | 485 |
| fig 6666666.28482.peg.292 | R006381 | (gi:15828396) mce1D (ML2592) - putative secreted protein [Mycobacterium leprae str. TN]                        | 64.6  | 480 | 485 |
| fig 6666666.28482.peg.292 | R019346 | (gi:221230873) mce1D (MLBr 02592) - putative secreted protein [Mycobacterium leprae str. Br4923]               | 64.6  | 480 | 485 |
| fig 6666666.28482.peg.292 | R019347 | (gi:333988765) mce1D (JDM601 0125) - MCE-family protein Mce1D [Mycobacterium sp. str. JDM601]                  | 61    | 481 | 485 |
| fig 6666666.28482.peg.293 | R006435 | (gi:118463703) mce2C (MAV 4549) - mce-family protein mce2c [Mycobacterium avium str. 104]                      | 86.57 | 469 | 474 |
| fig 6666666.28482.peg.293 | R006434 | (gi:41410184) mce2C (MAP4086) - hypothetical protein [Mycobacterium avium str. K-10 (subsp. paratuberculosis)] | 85.93 | 469 | 474 |
| fig 6666666.28482.peg.293 | R019371 | (gi:339630659) mce2C (MAF 05980) - MCE-family protein MCE2C [Mycobacterium africanum str. GM041182]            | 79.96 | 469 | 474 |
| fig 6666666.28482.peg.293 | R019374 | (gi:224988981) mce2C (JTY 0606) - MCE-family protein [Mycobacterium bovis str. BCG str. Tokyo 172]             | 79.74 | 469 | 474 |
| fig 6666666.28482.peg.293 | R006433 | (gi:121636509) mce2C (BCG 0636) - mce-family protein mce2C [Mycobacterium bovis str. BCG Pasteur 1173P2]       | 79.74 | 469 | 474 |
| fig 6666666.28482.peg.293 | R006432 | (gi:31791773) mce2C (Mb0606) - MCE-FAMILY PROTEIN MCE2C [Mycobacterium bovis str. AF2122/97]                   | 79.74 | 469 | 474 |

|                           |         |                                                                                                                |       |     |     |
|---------------------------|---------|----------------------------------------------------------------------------------------------------------------|-------|-----|-----|
| fig 6666666.28482.peg.293 | R019373 | (gi:253797526) mce2C (TBMG 00599) - MCE-family protein mce2C [Mycobacterium tuberculosis str. KZN 1435]        | 79.74 | 469 | 474 |
| fig 6666666.28482.peg.293 | R006429 | (gi:15607731) mce2C (Rv0591) - MCE-FAMILY PROTEIN MCE2C [Mycobacterium tuberculosis str. H37Rv]                | 79.74 | 469 | 474 |
| fig 6666666.28482.peg.293 | R006430 | (gi:148660361) mce2C (MRA 0599) - MCE-family protein Mce2C [Mycobacterium tuberculosis str. H37Ra]             | 79.74 | 469 | 474 |
| fig 6666666.28482.peg.293 | R013520 | (gi:148821794) mce2C (TBFG 10603) - MCE-family protein mce2C [Mycobacterium tuberculosis str. F11]             | 79.74 | 469 | 474 |
| fig 6666666.28482.peg.293 | R019372 | (gi:340625621) mce2C (MCAN 05971) - MCE-family protein MCE2C [Mycobacterium canettii str. CIPT 140010059]      | 80.17 | 469 | 474 |
| fig 6666666.28482.peg.293 | R006369 | (gi:41409704) mce1C (MAP3606) - hypothetical protein [Mycobacterium avium str. K-10 (subsp. paratuberculosis)] | 67.59 | 469 | 474 |
| fig 6666666.28482.peg.293 | R006370 | (gi:118467050) mce1C (MAV 5013) - mce-family protein mce1c [Mycobacterium avium str. 104]                      | 67.59 | 469 | 474 |
| fig 6666666.28482.peg.293 | R006364 | (gi:15607312) mce1C (Rv0171) - MCE-FAMILY PROTEIN MCE1C [Mycobacterium tuberculosis str. H37Rv]                | 68.8  | 468 | 474 |
| fig 6666666.28482.peg.293 | R006365 | (gi:148659935) mce1C (MRA 0179) - MCE-family protein Mce1C [Mycobacterium tuberculosis str. H37Ra]             | 68.8  | 468 | 474 |
| fig 6666666.28482.peg.293 | R013514 | (gi:148821363) mce1C (TBFG 10172) - MCE-family protein mce1C [Mycobacterium tuberculosis str. F11]             | 68.8  | 468 | 474 |
| fig 6666666.28482.peg.293 | R019336 | (gi:340625208) mce1C (MCAN 01771) - MCE-family protein MCE1C [Mycobacterium canettii str. CIPT 140010059]      | 69.02 | 468 | 474 |
| fig 6666666.28482.peg.293 | R019338 | (gi:224988556) mce1C (JTY 0177) - MCE-family protein [Mycobacterium bovis str. BCG str. Tokyo 172]             | 68.8  | 468 | 474 |
| fig 6666666.28482.peg.293 | R006368 | (gi:121636083) mce1C (BCG 0208) - MCE-family protein mce1C [Mycobacterium bovis str. BCG Pasteur 1173P2]       | 68.8  | 468 | 474 |
| fig 6666666.28482.peg.293 | R006367 | (gi:31791349) mce1C (Mb0177) - MCE-FAMILY PROTEIN MCE1C [Mycobacterium bovis str. AF2122/97]                   | 68.8  | 468 | 474 |
| fig 6666666.28482.peg.293 | R019335 | (gi:339630252) mce1C (MAF 01720) - MCE-family protein MCE1C [Mycobacterium africanum str. GM041182]            | 68.8  | 468 | 474 |
| fig 6666666.28482.peg.293 | R006366 | (gi:15839549) mce1C (MT0180) - virulence factor mce family protein [Mycobacterium tuberculosis str. CDC1551]   | 69    | 458 | 474 |

|                           |         |                                                                                                                          |       |     |     |
|---------------------------|---------|--------------------------------------------------------------------------------------------------------------------------|-------|-----|-----|
| fig 6666666.28482.peg.293 | R006373 | (gi:118473407) mce1C (MSMEG 0136) - virulence factor Mce family protein, putative [Mycobacterium smegmatis str. MC2 155] | 63.68 | 468 | 474 |
| fig 6666666.28482.peg.293 | R006431 | (gi:15839994) mce2C (MT0621) - virulence factor mce family protein [Mycobacterium tuberculosis str. CDC1551]             | 82.02 | 356 | 474 |
| fig 6666666.28482.peg.293 | R019337 | (gi:253797093) mce1C (TBMG 00172) - MCE-family protein mce1C [Mycobacterium tuberculosis str. KZN 1435]                  | 68.94 | 454 | 474 |
| fig 6666666.28482.peg.293 | R006438 | (gi:126432723) mce2C (Mjls 0110) - virulence factor Mce family protein [Mycobacterium sp. str. JLS]                      | 64.27 | 454 | 474 |
| fig 6666666.28482.peg.293 | R019334 | (gi:183980445) mce1C (MMAR 0414) - MCE-family protein Mce1C [Mycobacterium marinum str. M]                               | 65.75 | 472 | 474 |
| fig 6666666.28482.peg.293 | R006440 | (gi:108797100) mce2C (Mmcs 0120) - Mammalian cell entry [Mycobacterium sp. str. MCS]                                     | 64.71 | 454 | 474 |
| fig 6666666.28482.peg.293 | R006439 | (gi:119866185) mce2C (Mkms 0129) - virulence factor Mce family protein [Mycobacterium sp. str. KMS]                      | 64.71 | 454 | 474 |
| fig 6666666.28482.peg.293 | R006437 | (gi:120401164) mce2C (Mvan 0136) - virulence factor Mce family protein [Mycobacterium vanbaalenii str. PYR-1]            | 63.64 | 451 | 474 |
| fig 6666666.28482.peg.293 | R006371 | (gi:15828395) mce1C (ML2591) - putative secreted protein [Mycobacterium leprae str. TN]                                  | 62.63 | 469 | 474 |
| fig 6666666.28482.peg.293 | R019339 | (gi:221230872) mce1C (MLBr 02591) - putative secreted protein [Mycobacterium leprae str. Br4923]                         | 62.63 | 469 | 474 |
| fig 6666666.28482.peg.293 | R006372 | (gi:118616797) mce1C (MUL 1064) - MCE-family protein Mce1C [Mycobacterium ulcerans str. Agy99]                           | 65.12 | 472 | 474 |
| fig 6666666.28482.peg.293 | R006436 | (gi:145221304) mce2C (Mflv 0709) - virulence factor Mce family protein [Mycobacterium gilvum str. PYR-GCK]               | 62.97 | 451 | 474 |
| fig 6666666.28482.peg.294 | R006422 | (gi:41410183) mce2B (MAP4085) - hypothetical protein [Mycobacterium avium str. K-10 (subsp. paratuberculosis)]           | 87.46 | 343 | 343 |
| fig 6666666.28482.peg.294 | R019368 | (gi:340625620) mce2B (MCAN 05961) - mce-family protein mce2b [Mycobacterium canettii str. CIPT 140010059]                | 82.51 | 343 | 343 |
| fig 6666666.28482.peg.294 | R019370 | (gi:224988980) mce2B (JTY 0605) - MCE-family protein [Mycobacterium bovis str. BCG str. Tokyo 172]                       | 82.51 | 343 | 343 |
| fig 6666666.28482.peg.294 | R006421 | (gi:121636508) mce2B (BCG 0635) - mce-family protein mce2B [Mycobacterium bovis str. BCG Pasteur 1173P2]                 | 82.51 | 343 | 343 |

|                           |         |                                                                                                                |       |     |     |
|---------------------------|---------|----------------------------------------------------------------------------------------------------------------|-------|-----|-----|
| fig 6666666.28482.peg.294 | R006420 | (gi:31791772) mce2B (Mb0605) - MCE-FAMILY PROTEIN MCE2B [Mycobacterium bovis str. AF2122/97]                   | 82.51 | 343 | 343 |
| fig 6666666.28482.peg.294 | R019367 | (gi:339630658) mce2B (MAF 05970) - MCE-family protein MCE2B [Mycobacterium africanum str. GM041182]            | 82.22 | 343 | 343 |
| fig 6666666.28482.peg.294 | R006423 | (gi:118465867) mce2B (MAV 4550) - virulence factor Mce family protein [Mycobacterium avium str. 104]           | 87.17 | 343 | 343 |
| fig 6666666.28482.peg.294 | R006424 | (gi:145221305) mce2B (Mflv 0710) - virulence factor Mce family protein [Mycobacterium gilvum str. PYR-GCK]     | 69.97 | 343 | 343 |
| fig 6666666.28482.peg.294 | R006428 | (gi:108797099) mce2B (Mmcs 0119) - Mammalian cell entry [Mycobacterium sp. str. MCS]                           | 70.55 | 343 | 343 |
| fig 6666666.28482.peg.294 | R006427 | (gi:119866184) mce2B (Mkms 0128) - virulence factor Mce family protein [Mycobacterium sp. str. KMS]            | 70.55 | 343 | 343 |
| fig 6666666.28482.peg.294 | R006426 | (gi:126432722) mce2B (Mjls 0109) - virulence factor Mce family protein [Mycobacterium sp. str. JLS]            | 70.55 | 343 | 343 |
| fig 6666666.28482.peg.294 | R006425 | (gi:120401163) mce2B (Mvan 0135) - virulence factor Mce family protein [Mycobacterium vanbaalenii str. PYR-1]  | 69.68 | 343 | 343 |
| fig 6666666.28482.peg.294 | R006359 | (gi:41409703) mce1B (MAP3605) - hypothetical protein [Mycobacterium avium str. K-10 (subsp. paratuberculosis)] | 66.76 | 343 | 343 |
| fig 6666666.28482.peg.294 | R006360 | (gi:118463171) mce1B (MAV 5014) - virulence factor Mce family protein [Mycobacterium avium str. 104]           | 66.76 | 343 | 343 |
| fig 6666666.28482.peg.294 | R019327 | (gi:183980444) mce1B (MMAR 0413) - MCE-family protein Mce1B [Mycobacterium marinum str. M]                     | 65.61 | 343 | 343 |
| fig 6666666.28482.peg.294 | R006362 | (gi:118616796) mce1B (MUL 1063) - MCE-family protein Mce1B [Mycobacterium ulcerans str. Agy99]                 | 65.61 | 343 | 343 |
| fig 6666666.28482.peg.294 | R006361 | (gi:15828394) mce1B (ML2590) - putative secreted protein [Mycobacterium leprae str. TN]                        | 65.32 | 343 | 343 |
| fig 6666666.28482.peg.294 | R019332 | (gi:221230871) mce1B (MLBr 02590) - putative secreted protein [Mycobacterium leprae str. Br4923]               | 65.32 | 343 | 343 |
| fig 6666666.28482.peg.294 | R006363 | (gi:118468987) mce1B (MSMEG 0135) - virulence factor Mce family protein [Mycobacterium smegmatis str. MC2 155] | 64.72 | 343 | 343 |
| fig 6666666.28482.peg.294 | R019329 | (gi:340625207) mce1B (MCAN 01761) - MCE-family protein MCE1B [Mycobacterium canettii str. CIPT 140010059]      | 63.29 | 343 | 343 |

|                           |         |                                                                                                              |       |     |     |
|---------------------------|---------|--------------------------------------------------------------------------------------------------------------|-------|-----|-----|
| fig 6666666.28482.peg.294 | R019330 | (gi:253797092) mce1B (TBMG 00171) - MCE-family protein mce1B [Mycobacterium tuberculosis str. KZN 1435]      | 63.29 | 343 | 343 |
| fig 6666666.28482.peg.294 | R006354 | (gi:15607311) mce1B (Rv0170) - MCE-FAMILY PROTEIN MCE1B [Mycobacterium tuberculosis str. H37Rv]              | 63.29 | 343 | 343 |
| fig 6666666.28482.peg.294 | R006355 | (gi:148659934) mce1B (MRA 0178) - MCE-family protein Mce1B [Mycobacterium tuberculosis str. H37Ra]           | 63.29 | 343 | 343 |
| fig 6666666.28482.peg.294 | R013513 | (gi:148821362) mce1B (TBFG 10171) - MCE-family protein mce1B [Mycobacterium tuberculosis str. F11]           | 63.29 | 343 | 343 |
| fig 6666666.28482.peg.294 | R006356 | (gi:15839548) mce1B (MT0179) - virulence factor mce family protein [Mycobacterium tuberculosis str. CDC1551] | 63.29 | 343 | 343 |
| fig 6666666.28482.peg.294 | R019331 | (gi:224988555) mce1B (JTY 0176) - MCE-family protein [Mycobacterium bovis str. BCG str. Tokyo 172]           | 63.01 | 343 | 343 |
| fig 6666666.28482.peg.294 | R006358 | (gi:121636082) mce1B (BCG 0207) - MCE-family protein mce1B [Mycobacterium bovis str. BCG Pasteur 1173P2]     | 63.01 | 343 | 343 |
| fig 6666666.28482.peg.294 | R006357 | (gi:31791348) mce1B (Mb0176) - MCE-FAMILY PROTEIN MCE1B [Mycobacterium bovis str. AF2122/97]                 | 63.01 | 343 | 343 |
| fig 6666666.28482.peg.294 | R019328 | (gi:339630251) mce1B (MAF 01710) - MCE-family protein MCE1B [Mycobacterium africanum str. GM041182]          | 63.01 | 343 | 343 |
| fig 6666666.28482.peg.294 | R019369 | (gi:253797524) mce2B (TBMG 00597) - MCE-family protein mce2B [Mycobacterium tuberculosis str. KZN 1435]      | 83.59 | 256 | 343 |
| fig 6666666.28482.peg.294 | R006417 | (gi:15607730) mce2B (Rv0590) - MCE-FAMILY PROTEIN MCE2B [Mycobacterium tuberculosis str. H37Rv]              | 83.59 | 256 | 343 |
| fig 6666666.28482.peg.294 | R006418 | (gi:148660359) mce2B (MRA 0597) - MCE-family protein Mce2B [Mycobacterium tuberculosis str. H37Ra]           | 83.59 | 256 | 343 |
| fig 6666666.28482.peg.294 | R013519 | (gi:148821792) mce2B (TBFG 10601) - MCE-family protein mce2B [Mycobacterium tuberculosis str. F11]           | 83.59 | 256 | 343 |
| fig 6666666.28482.peg.294 | R006419 | (gi:15839992) mce2B (MT0619) - virulence factor mce family protein [Mycobacterium tuberculosis str. CDC1551] | 83.2  | 256 | 343 |
| fig 6666666.28482.peg.295 | R006410 | (gi:118465139) mce2A (MAV 4551) - virulence factor Mce family protein [Mycobacterium avium str. 104]         | 87.72 | 391 | 391 |
| fig 6666666.28482.peg.295 | R006409 | (gi:41410182) mce2A (MAP4084) - Mce2 [Mycobacterium avium str. K-10 (subsp. paratuberculosis)]               | 87.03 | 370 | 391 |

|                           |         |                                                                                                                |       |     |     |
|---------------------------|---------|----------------------------------------------------------------------------------------------------------------|-------|-----|-----|
| fig 6666666.28482.peg.295 | R019365 | (gi:253797523) mce2A (TBMG 00596) - MCE-family protein mce2A [Mycobacterium tuberculosis str. KZN 1435]        | 82.86 | 391 | 391 |
| fig 6666666.28482.peg.295 | R013518 | (gi:148821791) mce2A (TBFG 10600) - MCE-family protein mce2A [Mycobacterium tuberculosis str. F11]             | 82.86 | 391 | 391 |
| fig 6666666.28482.peg.295 | R006406 | (gi:15839991) mce2A (MT0618) - virulence factor [Mycobacterium tuberculosis str. CDC1551]                      | 82.86 | 391 | 391 |
| fig 6666666.28482.peg.295 | R019364 | (gi:340625619) mce2A (MCAN 05951) - MCE-family protein MCE2A [Mycobacterium canettii str. CIPT 140010059]      | 82.61 | 391 | 391 |
| fig 6666666.28482.peg.295 | R006404 | (gi:57116756) mce2A (Rv0589) - MCE-FAMILY PROTEIN MCE2A [Mycobacterium tuberculosis str. H37Rv]                | 82.61 | 391 | 391 |
| fig 6666666.28482.peg.295 | R006405 | (gi:148660358) mce2A (MRA 0596) - MCE-family protein Mce2A [Mycobacterium tuberculosis str. H37Ra]             | 82.61 | 391 | 391 |
| fig 6666666.28482.peg.295 | R019363 | (gi:339630657) mce2A (MAF 05960) - MCE-family protein MCE2A [Mycobacterium africanum str. GM041182]            | 82.61 | 391 | 391 |
| fig 6666666.28482.peg.295 | R019366 | (gi:224988979) mce2A (JTY 0604) - MCE-family protein [Mycobacterium bovis str. BCG str. Tokyo 172]             | 82.61 | 391 | 391 |
| fig 6666666.28482.peg.295 | R006408 | (gi:121636507) mce2A (BCG 0634) - mce-family protein mce2A [Mycobacterium bovis str. BCG Pasteur 1173P2]       | 82.61 | 391 | 391 |
| fig 6666666.28482.peg.295 | R006407 | (gi:31791771) mce2A (Mb0604) - MCE-FAMILY PROTEIN MCE2A [Mycobacterium bovis str. AF2122/97]                   | 82.61 | 391 | 391 |
| fig 6666666.28482.peg.295 | R006413 | (gi:120401162) mce2A (Mvan 0134) - virulence factor Mce family protein [Mycobacterium vanbaalenii str. PYR-1]  | 67.35 | 387 | 391 |
| fig 6666666.28482.peg.295 | R006412 | (gi:145221306) mce2A (Mflv 0711) - virulence factor Mce family protein [Mycobacterium gilvum str. PYR-GCK]     | 67.01 | 389 | 391 |
| fig 6666666.28482.peg.295 | R006416 | (gi:108797098) mce2A (Mmcs 0118) - Mammalian cell entry [Mycobacterium sp. str. MCS]                           | 66.93 | 387 | 391 |
| fig 6666666.28482.peg.295 | R006415 | (gi:119866183) mce2A (Mkms 0127) - virulence factor Mce family protein [Mycobacterium sp. str. KMS]            | 66.93 | 387 | 391 |
| fig 6666666.28482.peg.295 | R006414 | (gi:126432721) mce2A (Mjls 0108) - virulence factor Mce family protein [Mycobacterium sp. str. JLS]            | 66.32 | 389 | 391 |
| fig 6666666.28482.peg.295 | R006353 | (gi:118472305) mce1A (MSMEG 0134) - virulence factor Mce family protein [Mycobacterium smegmatis str. MC2 155] | 65.12 | 387 | 391 |

|                           |         |                                                                                                           |       |     |     |
|---------------------------|---------|-----------------------------------------------------------------------------------------------------------|-------|-----|-----|
| fig 6666666.28482.peg.295 | R019323 | (gi:253797091) mce1A (TBMG 00170) - MCE-family protein mce1A [Mycobacterium tuberculosis str. KZN 1435]   | 62.47 | 387 | 391 |
| fig 6666666.28482.peg.295 | R006341 | (gi:57116701) mce1A (Rv0169) - MCE-FAMILY PROTEIN MCE1A [Mycobacterium tuberculosis str. H37Rv]           | 62.47 | 387 | 391 |
| fig 6666666.28482.peg.295 | R006342 | (gi:148659933) mce1A (MRA 0177) - MCE-family protein Mce1A [Mycobacterium tuberculosis str. H37Ra]        | 62.47 | 387 | 391 |
| fig 6666666.28482.peg.295 | R013512 | (gi:148821361) mce1A (TBFG 10170) - MCE-family protein mce1A [Mycobacterium tuberculosis str. F11]        | 62.47 | 387 | 391 |
| fig 6666666.28482.peg.295 | R006343 | (gi:15839547) mce1A (MT0178) - virulence factor [Mycobacterium tuberculosis str. CDC1551]                 | 62.47 | 387 | 391 |
| fig 6666666.28482.peg.295 | R019324 | (gi:224988554) mce1A (JTY 0175) - MCE-family protein [Mycobacterium bovis str. BCG str. Tokyo 172]        | 61.24 | 387 | 391 |
| fig 6666666.28482.peg.295 | R006345 | (gi:121636081) mce1A (BCG 0206) - MCE-family protein mce1A [Mycobacterium bovis str. BCG Pasteur 1173P2]  | 61.24 | 387 | 391 |
| fig 6666666.28482.peg.295 | R006344 | (gi:31791347) mce1A (Mb0175) - MCE-FAMILY PROTEIN MCE1A [Mycobacterium bovis str. AF2122/97]              | 61.24 | 387 | 391 |
| fig 6666666.28482.peg.295 | R019322 | (gi:340625206) mce1A (MCAN 01751) - MCE-family protein MCE1A [Mycobacterium canettii str. CIPT 140010059] | 61.24 | 387 | 391 |
| fig 6666666.28482.peg.295 | R019321 | (gi:339630250) mce1A (MAF 01700) - MCE-family protein MCE1A [Mycobacterium africanum str. GM041182]       | 61.24 | 387 | 391 |
| fig 6666666.28482.peg.295 | R006349 | (gi:118464153) mce1A (MAV 4125) - virulence factor Mce family protein [Mycobacterium avium str. 104]      | 62.8  | 385 | 391 |
| fig 6666666.28482.peg.295 | R019362 | (gi:183984851) mce2A (MMAR 4883) - MCE-family protein Mce2A [Mycobacterium marinum str. M]                | 65.78 | 375 | 391 |
| fig 6666666.28482.peg.295 | R019320 | (gi:183980443) mce1A (MMAR 0412) - MCE-family protein Mce1A [Mycobacterium marinum str. M]                | 62.2  | 389 | 391 |
| fig 6666666.28482.peg.295 | R006348 | (gi:118465982) mce1A (MAV 5015) - virulence factor Mce family protein [Mycobacterium avium str. 104]      | 61.48 | 389 | 391 |
| fig 6666666.28482.peg.295 | R006352 | (gi:118616795) mce1A (MUL 1062) - MCE-family protein Mce1A [Mycobacterium ulcerans str. Agy99]            | 61.96 | 389 | 391 |
| fig 6666666.28482.peg.295 | R006346 | (gi:41409702) mce1A (MAP3604) - Mce1 2 [Mycobacterium avium str. K-10 (subsp. paratuberculosis)]          | 62.2  | 389 | 391 |

|                           |         |                                                                                                                     |       |     |     |
|---------------------------|---------|---------------------------------------------------------------------------------------------------------------------|-------|-----|-----|
| fig 6666666.28482.peg.295 | R006350 | (gi:118464886) mce1A (MAV 4126) - virulence factor Mce family protein [Mycobacterium avium str. 104]                | 63.59 | 372 | 391 |
| fig 6666666.28482.peg.295 | R006411 | (gi:118616268) mce2A (MUL 0415) - MCE-family protein Mce2A [Mycobacterium ulcerans str. Agy99]                      | 65.25 | 375 | 391 |
| fig 6666666.28482.peg.295 | R006347 | (gi:41409387) mce1A (MAP3289c) - Mce1 1 [Mycobacterium avium str. K-10 (subsp. paratuberculosis)]                   | 63.59 | 372 | 391 |
| fig 6666666.28482.peg.385 | R018510 | (gi:118466437) eccE3 (MAV 4860) - hypothetical protein [Mycobacterium avium str. 104]                               | 67.68 | 328 | 332 |
| fig 6666666.28482.peg.385 | R018511 | (gi:15828359) eccE3 (ML2527) - hypothetical protein [Mycobacterium leprae str. TN]                                  | 62.85 | 320 | 332 |
| fig 6666666.28482.peg.385 | R019744 | (gi:221230836) eccE3 (MLBr 02527) - hypothetical protein [Mycobacterium leprae str. Br4923]                         | 62.85 | 320 | 332 |
| fig 6666666.28482.peg.385 | R019738 | (gi:183980579) eccE3 (MMAR 0551) - transmembrane protein [Mycobacterium marinum str. M]                             | 61.08 | 327 | 332 |
| fig 6666666.28482.peg.385 | R019742 | (gi:253797219) eccE3 (TBMG 00297) - hypothetical protein [Mycobacterium tuberculosis str. KZN 1435]                 | 62.96 | 321 | 332 |
| fig 6666666.28482.peg.385 | R018503 | (gi:148821490) eccE3 (TBFG 10299) - transmembrane protein [Mycobacterium tuberculosis str. F11]                     | 62.96 | 321 | 332 |
| fig 6666666.28482.peg.385 | R018506 | (gi:15839678) eccE3 (MT0305) - hypothetical protein [Mycobacterium tuberculosis str. CDC1551]                       | 62.96 | 321 | 332 |
| fig 6666666.28482.peg.385 | R019741 | (gi:340625330) eccE3 (MCAN 03011) - hypothetical protein [Mycobacterium canettii str. CIPT 140010059]               | 62.96 | 321 | 332 |
| fig 6666666.28482.peg.385 | R019743 | (gi:224988680) eccE3 (JTY 0302) - putative transmembrane protein [Mycobacterium bovis str. BCG str. Tokyo 172]      | 62.96 | 321 | 332 |
| fig 6666666.28482.peg.385 | R018508 | (gi:121636207) eccE3 (BCG 0332) - putative transmembrane protein [Mycobacterium bovis str. BCG Pasteur 1173P2]      | 62.96 | 321 | 332 |
| fig 6666666.28482.peg.385 | R018507 | (gi:31791471) eccE3 (Mb0300) - transmembrane protein [Mycobacterium bovis str. AF2122/97]                           | 62.96 | 321 | 332 |
| fig 6666666.28482.peg.385 | R019740 | (gi:339630367) eccE3 (MAF 02940) - putative conserved transmembrane protein [Mycobacterium africanum str. GM041182] | 62.96 | 321 | 332 |
| fig 6666666.28482.peg.385 | R018504 | (gi:15607433) eccE3 (Rv0292) - transmembrane protein [Mycobacterium tuberculosis str. H37Rv]                        | 62.65 | 321 | 332 |



|                           |         |                                                                                                                                                                                         |       |     |     |
|---------------------------|---------|-----------------------------------------------------------------------------------------------------------------------------------------------------------------------------------------|-------|-----|-----|
| fig 6666666.28482.peg.385 | R018505 | (gi:148660058) eccE3 (MRA 0301) - putative transmembrane protein [Mycobacterium tuberculosis str. H37Ra]                                                                                | 62.65 | 321 | 332 |
| fig 6666666.28482.peg.385 | R018509 | (gi:41409886) eccE3 (MAP3788) - hypothetical protein [Mycobacterium avium str. K-10 (subsp. paratuberculosis)]                                                                          | 67.08 | 243 | 332 |
| fig 6666666.28482.peg.386 | R019734 | (gi:253797218) mycP3 (TBMG 00296) - membrane-anchored mycosin [Mycobacterium tuberculosis str. KZN 1435]                                                                                | 75    | 460 | 467 |
| fig 6666666.28482.peg.386 | R018488 | (gi:15607432) mycP3 (Rv0291) - membrane-anchored mycosin [Mycobacterium tuberculosis str. H37Rv]                                                                                        | 75    | 460 | 467 |
| fig 6666666.28482.peg.386 | R018489 | (gi:148660057) mycP3 (MRA 0300) - putative membrane-anchored mycosin [Mycobacterium tuberculosis str. H37Ra]                                                                            | 75    | 460 | 467 |
| fig 6666666.28482.peg.386 | R018487 | (gi:148821489) mycP3 (TBFG 10298) - membrane-anchored mycosin [Mycobacterium tuberculosis str. F11]                                                                                     | 75    | 460 | 467 |
| fig 6666666.28482.peg.386 | R019733 | (gi:340625329) mycP3 (MCAN 03001) - putative membrane-anchored mycosin [Mycobacterium canettii str. CIPT 140010059]                                                                     | 75    | 460 | 467 |
| fig 6666666.28482.peg.386 | R019735 | (gi:224988679) mycP3 (JTY 0301) - putative protease precursor [Mycobacterium bovis str. BCG str. Tokyo 172]                                                                             | 75    | 460 | 467 |
| fig 6666666.28482.peg.386 | R018492 | (gi:121636206) mycP3 (BCG 0331) - putative protease precursor [Mycobacterium bovis str. BCG Pasteur 1173P2]                                                                             | 75    | 460 | 467 |
| fig 6666666.28482.peg.386 | R018491 | (gi:31791470) mycP3 (Mb0299) - protease precursor [Mycobacterium bovis str. AF2122/97]                                                                                                  | 75    | 460 | 467 |
| fig 6666666.28482.peg.386 | R019732 | (gi:339630366) mycP3 (MAF 02930) - putative membrane-anchored mycosin (serine protease) (subtilisin-like protease) (subtilase-like) (mycosin-3) [Mycobacterium africanum str. GM041182] | 75    | 460 | 467 |
| fig 6666666.28482.peg.386 | R018495 | (gi:15828360) mycP3 (ML2528) - protease [Mycobacterium leprae str. TN]                                                                                                                  | 71.97 | 463 | 467 |
| fig 6666666.28482.peg.386 | R019736 | (gi:221230837) mycP3 (MLBr 02528) - putative protease [Mycobacterium leprae str. Br4923]                                                                                                | 71.97 | 463 | 467 |
| fig 6666666.28482.peg.386 | R019730 | (gi:183980578) mycP3 (MMAR 0550) - membrane-anchored mycosin [Mycobacterium marinum str. M]                                                                                             | 72.9  | 459 | 467 |
| fig 6666666.28482.peg.386 | R018496 | (gi:118616927) mycP3 (MUL 1213) - membrane-anchored mycosin [Mycobacterium ulcerans str. Agy99]                                                                                         | 72.47 | 459 | 467 |
| fig 6666666.28482.peg.386 | R018490 | (gi:15839677) mycP3 (MT0304) - subtilase family protein [Mycobacterium tuberculosis str. CDC1551]                                                                                       | 78.45 | 413 | 467 |

|                           |         |                                                                                                                       |       |     |     |
|---------------------------|---------|-----------------------------------------------------------------------------------------------------------------------|-------|-----|-----|
| fig 6666666.28482.peg.386 | R018494 | (gi:118462463) mycP3 (MAV 4862) - subtilase [Mycobacterium avium str. 104]                                            | 80.52 | 420 | 467 |
| fig 6666666.28482.peg.386 | R018493 | (gi:41409885) mycP3 (MAP3787) - hypothetical protein [Mycobacterium avium str. K-10 (subsp. paratuberculosis)]        | 80.09 | 421 | 467 |
| fig 6666666.28482.peg.386 | R018502 | (gi:108797360) mycP3 (Mmcs 0380) - peptidase S8/S53 subtilisin kexin sedolisin [Mycobacterium sp. str. MCS]           | 66.82 | 437 | 467 |
| fig 6666666.28482.peg.386 | R018501 | (gi:119866444) mycP3 (Mkms 0389) - peptidase S8/S53 subtilisin kexin sedolisin [Mycobacterium sp. str. KMS]           | 66.82 | 437 | 467 |
| fig 6666666.28482.peg.386 | R018500 | (gi:126432981) mycP3 (Mjls 0368) - peptidase S8/S53 subtilisin kexin sedolisin [Mycobacterium sp. str. JLS]           | 66.82 | 437 | 467 |
| fig 6666666.28482.peg.386 | R018497 | (gi:118469114) mycP3 (MSMEG 0624) - subtilase [Mycobacterium smegmatis str. MC2 155]                                  | 60.38 | 461 | 467 |
| fig 6666666.28482.peg.386 | R019737 | (gi:333988939) mycP3 (JDM601 0299) - membrane-anchored mycosin MycP3 [Mycobacterium sp. str. JDM601]                  | 70.31 | 417 | 467 |
| fig 6666666.28482.peg.386 | R018499 | (gi:120401446) mycP3 (Mvan 0421) - peptidase S8/S53 subtilisin kexin sedolisin [Mycobacterium vanbaalenii str. PYR-1] | 61.1  | 437 | 467 |
| fig 6666666.28482.peg.386 | R018498 | (gi:145220924) mycP3 (Mflv 0320) - peptidase S8/S53 subtilisin kexin sedolisin [Mycobacterium gilvum str. PYR-GCK]    | 64.8  | 375 | 467 |
| fig 6666666.28482.peg.387 | R018478 | (gi:118465427) eccD3 (MAV 4863) - hypothetical protein [Mycobacterium avium str. 104]                                 | 81.25 | 474 | 474 |
| fig 6666666.28482.peg.387 | R018477 | (gi:41409884) eccD3 (MAP3786) - hypothetical protein [Mycobacterium avium str. K-10 (subsp. paratuberculosis)]        | 81.67 | 474 | 474 |
| fig 6666666.28482.peg.387 | R019726 | (gi:253797217) eccD3 (TBMG 00295) - hypothetical protein [Mycobacterium tuberculosis str. KZN 1435]                   | 80.72 | 472 | 474 |
| fig 6666666.28482.peg.387 | R018472 | (gi:15607431) eccD3 (Rv0290) - transmembrane protein [Mycobacterium tuberculosis str. H37Rv]                          | 80.72 | 472 | 474 |
| fig 6666666.28482.peg.387 | R018473 | (gi:148660056) eccD3 (MRA 0299) - putative transmembrane protein [Mycobacterium tuberculosis str. H37Ra]              | 80.72 | 472 | 474 |
| fig 6666666.28482.peg.387 | R018471 | (gi:148821488) eccD3 (TBFG 10297) - transmembrane protein [Mycobacterium tuberculosis str. F11]                       | 80.72 | 472 | 474 |
| fig 6666666.28482.peg.387 | R018474 | (gi:15839676) eccD3 (MT0303) - hypothetical protein [Mycobacterium tuberculosis str. CDC1551]                         | 80.72 | 472 | 474 |

|                           |         |                                                                                                                     |       |     |     |
|---------------------------|---------|---------------------------------------------------------------------------------------------------------------------|-------|-----|-----|
| fig 6666666.28482.peg.387 | R019724 | (gi:339630365) eccD3 (MAF 02920) - putative conserved transmembrane protein [Mycobacterium africanum str. GM041182] | 80.72 | 472 | 474 |
| fig 6666666.28482.peg.387 | R019725 | (gi:340625328) eccD3 (MCAN 02991) - hypothetical protein [Mycobacterium canettii str. CIPT 140010059]               | 80.72 | 472 | 474 |
| fig 6666666.28482.peg.387 | R019727 | (gi:224988678) eccD3 (JTY 0300) - putative transmembrane protein [Mycobacterium bovis str. BCG str. Tokyo 172]      | 80.51 | 472 | 474 |
| fig 6666666.28482.peg.387 | R018476 | (gi:121636205) eccD3 (BCG 0330) - putative transmembrane protein [Mycobacterium bovis str. BCG Pasteur 1173P2]      | 80.51 | 472 | 474 |
| fig 6666666.28482.peg.387 | R018475 | (gi:31791469) eccD3 (Mb0298) - transmembrane protein [Mycobacterium bovis str. AF2122/97]                           | 80.51 | 472 | 474 |
| fig 6666666.28482.peg.387 | R018480 | (gi:118616926) eccD3 (MUL 1212) - transmembrane protein [Mycobacterium ulcerans str. Agy99]                         | 77.33 | 472 | 474 |
| fig 6666666.28482.peg.387 | R018479 | (gi:15828361) eccD3 (ML2529) - hypothetical protein [Mycobacterium leprae str. TN]                                  | 76.37 | 474 | 474 |
| fig 6666666.28482.peg.387 | R019728 | (gi:221230838) eccD3 (MLBr 02529) - hypothetical protein [Mycobacterium leprae str. Br4923]                         | 76.37 | 474 | 474 |
| fig 6666666.28482.peg.387 | R019722 | (gi:183980577) eccD3 (MMAR 0549) - transmembrane protein [Mycobacterium marinum str. M]                             | 77.54 | 472 | 474 |
| fig 6666666.28482.peg.387 | R019729 | (gi:333988938) eccD3 (JDM601 0298) - transmembrane protein [Mycobacterium sp. str. JDM601]                          | 66.24 | 468 | 474 |
| fig 6666666.28482.peg.387 | R018481 | (gi:118471932) eccD3 (MSMEG 0623) - secretion protein Snm4 [Mycobacterium smegmatis str. MC2 155]                   | 60.88 | 474 | 474 |
| fig 6666666.28482.peg.388 | R019718 | (gi:253797216) espG3 (TBMG 00294) - hypothetical protein [Mycobacterium tuberculosis str. KZN 1435]                 | 77.63 | 289 | 293 |
| fig 6666666.28482.peg.388 | R018456 | (gi:15607430) espG3 (Rv0289) - hypothetical protein [Mycobacterium tuberculosis str. H37Rv]                         | 77.63 | 289 | 293 |
| fig 6666666.28482.peg.388 | R018457 | (gi:148660055) espG3 (MRA 0298) - hypothetical protein [Mycobacterium tuberculosis str. H37Ra]                      | 77.63 | 289 | 293 |
| fig 6666666.28482.peg.388 | R018455 | (gi:148821487) espG3 (TBF3 10296) - hypothetical protein [Mycobacterium tuberculosis str. F11]                      | 77.63 | 289 | 293 |
| fig 6666666.28482.peg.388 | R018458 | (gi:15839675) espG3 (MT0302) - hypothetical protein [Mycobacterium tuberculosis str. CDC1551]                       | 77.63 | 289 | 293 |

|                           |         |                                                                                                                |       |     |     |
|---------------------------|---------|----------------------------------------------------------------------------------------------------------------|-------|-----|-----|
| fig 6666666.28482.peg.388 | R019717 | (gi:340625327) espG3 (MCAN 02981) - hypothetical protein [Mycobacterium canettii str. CIPT 140010059]          | 77.63 | 289 | 293 |
| fig 6666666.28482.peg.388 | R019719 | (gi:224988677) espG3 (JTY 0299) - hypothetical protein [Mycobacterium bovis str. BCG str. Tokyo 172]           | 77.63 | 289 | 293 |
| fig 6666666.28482.peg.388 | R018460 | (gi:121636204) espG3 (BCG 0329) - hypothetical protein [Mycobacterium bovis str. BCG Pasteur 1173P2]           | 77.63 | 289 | 293 |
| fig 6666666.28482.peg.388 | R018459 | (gi:31791468) espG3 (Mb0297) - hypothetical protein [Mycobacterium bovis str. AF2122/97]                       | 77.63 | 289 | 293 |
| fig 6666666.28482.peg.388 | R019716 | (gi:339630364) espG3 (MAF 02910) - hypothetical protein [Mycobacterium africanum str. GM041182]                | 77.63 | 289 | 293 |
| fig 6666666.28482.peg.388 | R018463 | (gi:15828362) espG3 (ML2530) - DNA-binding protein [Mycobacterium leprae str. TN]                              | 77.7  | 287 | 293 |
| fig 6666666.28482.peg.388 | R019720 | (gi:221230839) espG3 (MLBr 02530) - putative DNA-binding protein [Mycobacterium leprae str. Br4923]            | 77.7  | 287 | 293 |
| fig 6666666.28482.peg.388 | R018462 | (gi:118465963) espG3 (MAV 4864) - hypothetical protein [Mycobacterium avium str. 104]                          | 77.13 | 288 | 293 |
| fig 6666666.28482.peg.388 | R019714 | (gi:183980576) espG3 (MMAR 0548) - hypothetical protein [Mycobacterium marinum str. M]                         | 74.32 | 287 | 293 |
| fig 6666666.28482.peg.388 | R018461 | (gi:41409883) espG3 (MAP3785) - hypothetical protein [Mycobacterium avium str. K-10 (subsp. paratuberculosis)] | 76.79 | 288 | 293 |
| fig 6666666.28482.peg.388 | R018464 | (gi:118616925) espG3 (MUL 1211) - hypothetical protein [Mycobacterium ulcerans str. Agy99]                     | 73.99 | 287 | 293 |
| fig 6666666.28482.peg.388 | R019721 | (gi:333988937) espG3 (JDM601 0297) - hypothetical protein [Mycobacterium sp. str. JDM601]                      | 71.33 | 283 | 293 |
| fig 6666666.28482.peg.389 | R018446 | (gi:118465386) esxH (MAV 4865) - low molecular weight protein antigen 7 Cfp7 [Mycobacterium avium str. 104]    | 89.58 | 96  | 96  |
| fig 6666666.28482.peg.389 | R018445 | (gi:41409882) esxH (MAP3784) - hypothetical protein [Mycobacterium avium str. K-10 (subsp. paratuberculosis)]  | 89.58 | 96  | 96  |
| fig 6666666.28482.peg.389 | R019706 | (gi:183980575) esxH (MMAR 0547) - EsaT-6 like protein EsxH [Mycobacterium marinum str. M]                      | 84.38 | 96  | 96  |
| fig 6666666.28482.peg.389 | R018448 | (gi:118616924) esxH (MUL 1210) - EsaT-6 like protein EsxH [Mycobacterium ulcerans str. Agy99]                  | 83.33 | 96  | 96  |

|                           |         |                                                                                                                                                                 |       |    |    |
|---------------------------|---------|-----------------------------------------------------------------------------------------------------------------------------------------------------------------|-------|----|----|
| fig 6666666.28482.peg.389 | R019710 | (gi:253797215) esxH (TBMG 00293) - low molecular weight protein antigen 7 esxH [Mycobacterium tuberculosis str. KZN 1435]                                       | 86.46 | 96 | 96 |
| fig 6666666.28482.peg.389 | R018440 | (gi:15607429) esxH (Rv0288) - low molecular weight protein antigen 7 ESXH (10 kDa antigen) (CFP-7) (protein TB10.4) [Mycobacterium tuberculosis str. H37Rv]     | 86.46 | 96 | 96 |
| fig 6666666.28482.peg.389 | R018441 | (gi:148660054) esxH (MRA 0297) - antigen Esxh [Mycobacterium tuberculosis str. H37Ra]                                                                           | 86.46 | 96 | 96 |
| fig 6666666.28482.peg.389 | R018439 | (gi:148821486) esxH (TBFH 10295) - putative antigen [Mycobacterium tuberculosis str. F11]                                                                       | 86.46 | 96 | 96 |
| fig 6666666.28482.peg.389 | R018442 | (gi:15839674) esxH (MT0301) - secreted antigen, putative [Mycobacterium tuberculosis str. CDC1551]                                                              | 86.46 | 96 | 96 |
| fig 6666666.28482.peg.389 | R019709 | (gi:340625326) esxH (MCAN 02971) - low molecular weight protein antigen 7 ESXH [Mycobacterium canettii str. CIPT 140010059]                                     | 86.46 | 96 | 96 |
| fig 6666666.28482.peg.389 | R019711 | (gi:224988676) esxH (JTY 0298) - low molecular weight protein antigen 7 [Mycobacterium bovis str. BCG str. Tokyo 172]                                           | 86.46 | 96 | 96 |
| fig 6666666.28482.peg.389 | R018444 | (gi:121636203) esxH (BCG 0328) - low molecular weight protein antigen 7 cfp7 [Mycobacterium bovis str. BCG Pasteur 1173P2]                                      | 86.46 | 96 | 96 |
| fig 6666666.28482.peg.389 | R018443 | (gi:31791467) esxH (Mb0296) - low molecular weight protein antigen 7 CFP7 (10 kDa antigen) (CFP-7) (protein TB10.4) [Mycobacterium bovis str. AF2122/97]        | 86.46 | 96 | 96 |
| fig 6666666.28482.peg.389 | R019708 | (gi:339630363) esxH (MAF 02900) - low molecular weight protein antigen 7 EsxH (10 kDa antigen) (CFP-7) (protein TB10.4) [Mycobacterium africanum str. GM041182] | 85.42 | 96 | 96 |
| fig 6666666.28482.peg.389 | R019713 | (gi:333988928) esxH (JDM601 0288) - EsaT-6 like protein EsxH [Mycobacterium sp. str. JDM601]                                                                    | 84.21 | 95 | 96 |
| fig 6666666.28482.peg.389 | R018450 | (gi:145220927) esxH (Mflv 0323) - hypothetical protein [Mycobacterium gilvum str. PYR-GCK]                                                                      | 76.84 | 95 | 96 |
| fig 6666666.28482.peg.389 | R018454 | (gi:108797357) esxH (Mmcs 0377) - hypothetical protein [Mycobacterium sp. str. MCS]                                                                             | 75.79 | 95 | 96 |
| fig 6666666.28482.peg.389 | R018453 | (gi:119866441) esxH (Mkms 0386) - hypothetical protein [Mycobacterium sp. str. KMS]                                                                             | 75.79 | 95 | 96 |
| fig 6666666.28482.peg.389 | R018452 | (gi:126432978) esxH (Mjls 0365) - hypothetical protein [Mycobacterium sp. str. JLS]                                                                             | 75.79 | 95 | 96 |

|                           |         |                                                                                                                  |       |    |    |
|---------------------------|---------|------------------------------------------------------------------------------------------------------------------|-------|----|----|
| fig 6666666.28482.peg.389 | R018449 | (gi:118470541) esxH (MSMEG 0621) - low molecular weight protein antigen 7 [Mycobacterium smegmatis str. MC2 155] | 75.79 | 95 | 96 |
| fig 6666666.28482.peg.389 | R018451 | (gi:120401443) esxH (Mvan 0418) - hypothetical protein [Mycobacterium vanbaalenii str. PYR-1]                    | 74.74 | 95 | 96 |
| fig 6666666.28482.peg.389 | R018447 | (gi:15828363) esxH (ML2531) - cell surface protein [Mycobacterium leprae str. TN]                                | 70.83 | 96 | 96 |
| fig 6666666.28482.peg.389 | R019712 | (gi:221230840) esxH (MLBr 02531) - putative cell surface protein [Mycobacterium leprae str. Br4923]              | 70.83 | 96 | 96 |
| fig 6666666.28482.peg.389 | R019707 | (gi:169629314) esxH (MAB 2228c) - ESAT-6-like protein esxH [Mycobacterium abscessus str. ATCC 19977]             | 66.32 | 95 | 96 |
| fig 6666666.28482.peg.390 | R018687 | (gi:41409881) esxG (MAP3783) - hypothetical protein [Mycobacterium avium str. K-10 (subsp. paratuberculosis)]    | 95.88 | 97 | 97 |
| fig 6666666.28482.peg.390 | R018688 | (gi:118465920) esxG (MAV 4866) - PE family protein [Mycobacterium avium str. 104]                                | 95.79 | 95 | 97 |
| fig 6666666.28482.peg.390 | R019904 | (gi:126432977) esxG (Mjls 0364) - hypothetical protein [Mycobacterium sp. str. JLS]                              | 78.35 | 97 | 97 |
| fig 6666666.28482.peg.390 | R019667 | (gi:169629315) esxG (MAB 2229c) - PE family protein [Mycobacterium abscessus str. ATCC 19977]                    | 76.29 | 97 | 97 |
| fig 6666666.28482.peg.390 | R018689 | (gi:15828364) esxG (ML2532) - PE-family protein [Mycobacterium leprae str. TN]                                   | 76.04 | 96 | 97 |
| fig 6666666.28482.peg.390 | R019672 | (gi:221230841) esxG (MLBr 02532) - PE-family protein [Mycobacterium leprae str. Br4923]                          | 76.04 | 96 | 97 |
| fig 6666666.28482.peg.390 | R019906 | (gi:108797356) esxG (Mmcs 0376) - hypothetical protein [Mycobacterium sp. str. MCS]                              | 79.31 | 87 | 97 |
| fig 6666666.28482.peg.390 | R019905 | (gi:119866440) esxG (Mkms 0385) - hypothetical protein [Mycobacterium sp. str. KMS]                              | 79.31 | 87 | 97 |
| fig 6666666.28482.peg.390 | R019903 | (gi:120401442) esxG (Mvan 0417) - hypothetical protein [Mycobacterium vanbaalenii str. PYR-1]                    | 79.38 | 97 | 97 |
| fig 6666666.28482.peg.390 | R019673 | (gi:333988927) esxG (JDM601 0287) - EsaT-6 like protein EsxG [Mycobacterium sp. str. JDM601]                     | 77.89 | 95 | 97 |
| fig 6666666.28482.peg.390 | R019901 | (gi:118469490) esxG (MSMEG 0620) - PE family protein [Mycobacterium smegmatis str. MC2 155]                      | 76.29 | 97 | 97 |

|                           |         |                                                                                                                                           |       |     |     |
|---------------------------|---------|-------------------------------------------------------------------------------------------------------------------------------------------|-------|-----|-----|
| fig 6666666.28482.peg.390 | R019670 | (gi:253797214) esxG (TBMG 00292) - esat-6 like protein esxG [Mycobacterium tuberculosis str. KZN 1435]                                    | 85.57 | 97  | 97  |
| fig 6666666.28482.peg.390 | R018682 | (gi:15607428) esxG (Rv0287) - hypothetical protein [Mycobacterium tuberculosis str. H37Rv]                                                | 85.57 | 97  | 97  |
| fig 6666666.28482.peg.390 | R018683 | (gi:148660053) esxG (MRA 0296) - PE family protein [Mycobacterium tuberculosis str. H37Ra]                                                | 85.57 | 97  | 97  |
| fig 6666666.28482.peg.390 | R018681 | (gi:148821485) esxG (TBF 10294) - Esat-6 like protein esxG [Mycobacterium tuberculosis str. F11]                                          | 85.57 | 97  | 97  |
| fig 6666666.28482.peg.390 | R018684 | (gi:15839673) esxG (MT0300) - PE family protein [Mycobacterium tuberculosis str. CDC1551]                                                 | 85.57 | 97  | 97  |
| fig 6666666.28482.peg.390 | R019669 | (gi:340625325) esxG (MCAN 02961) - ESAT-6 like protein ESXG [Mycobacterium canettii str. CIPT 140010059]                                  | 85.57 | 97  | 97  |
| fig 6666666.28482.peg.390 | R019671 | (gi:224988675) esxG (JTY 0297) - hypothetical protein TB9.8 [Mycobacterium bovis str. BCG str. Tokyo 172]                                 | 85.57 | 97  | 97  |
| fig 6666666.28482.peg.390 | R018686 | (gi:121636202) esxG (BCG 0327) - hypothetical protein [Mycobacterium bovis str. BCG Pasteur 1173P2]                                       | 85.57 | 97  | 97  |
| fig 6666666.28482.peg.390 | R018685 | (gi:31791466) esxG (Mb0295) - hypothetical protein [Mycobacterium bovis str. AF2122/97]                                                   | 85.57 | 97  | 97  |
| fig 6666666.28482.peg.390 | R019668 | (gi:339630362) esxG (MAF 02890) - ESAT-6 like protein ESXG (conserved hypothetical protein TB9.8) [Mycobacterium africanum str. GM041182] | 85.57 | 97  | 97  |
| fig 6666666.28482.peg.390 | R018690 | (gi:118616923) esxG (MUL 1209) - EsaT-6 like protein EsxG [Mycobacterium ulcerans str. Agy99]                                             | 84.54 | 97  | 97  |
| fig 6666666.28482.peg.390 | R019666 | (gi:183980574) esxG (MMAR 0546) - EsaT-6 like protein EsxG [Mycobacterium marinum str. M]                                                 | 84.54 | 97  | 97  |
| fig 6666666.28482.peg.390 | R019902 | (gi:145220928) esxG (Mflv 0324) - hypothetical protein [Mycobacterium gilvum str. PYR-GCK]                                                | 74.23 | 97  | 97  |
| fig 6666666.28482.peg.538 | R006594 | (gi:41408209) mce3F (MAP2111c) - hypothetical protein [Mycobacterium avium str. K-10 (subsp. paratuberculosis)]                           | 87.2  | 492 | 492 |
| fig 6666666.28482.peg.538 | R006596 | (gi:118466763) mce3F (MAV 2069) - virulence factor mce family protein [Mycobacterium avium str. 104]                                      | 86.3  | 489 | 492 |
| fig 6666666.28482.peg.539 | R006571 | (gi:41408210) mce3E (MAP2112c) - LprM [Mycobacterium avium str. K-10 (subsp. paratuberculosis)]                                           | 88.76 | 356 | 369 |

|                           |         |                                                                                                                                            |       |     |     |
|---------------------------|---------|--------------------------------------------------------------------------------------------------------------------------------------------|-------|-----|-----|
| fig 6666666.28482.peg.539 | R006586 | (gi:126436756) mce3E (Mjls 4184) - virulence factor Mce family protein [Mycobacterium sp. str. JLS]                                        | 62.6  | 361 | 369 |
| fig 6666666.28482.peg.539 | R006581 | (gi:120401941) mce3E (Mvan 0926) - virulence factor Mce family protein [Mycobacterium vanbaalenii str. PYR-1]                              | 61.33 | 362 | 369 |
| fig 6666666.28482.peg.539 | R019404 | (gi:183984026) mce3E (MMAR 4055) - MCE family lipoprotein LprM [Mycobacterium marinum str. M]                                              | 63.28 | 353 | 369 |
| fig 6666666.28482.peg.539 | R006574 | (gi:118619131) mce3E (MUL 3922) - MCE-family lipoprotein LprM 1 [Mycobacterium ulcerans str. Agy99]                                        | 62.99 | 353 | 369 |
| fig 6666666.28482.peg.539 | R006578 | (gi:120401538) mce3E (Mvan 0517) - virulence factor Mce family protein [Mycobacterium vanbaalenii str. PYR-1]                              | 62.3  | 364 | 369 |
| fig 6666666.28482.peg.539 | R006590 | (gi:108798627) mce3E (Mmcs 1658) - Mammalian cell entry [Mycobacterium sp. str. MCS]                                                       | 62.3  | 364 | 369 |
| fig 6666666.28482.peg.539 | R006588 | (gi:119867723) mce3E (Mkms 1682) - virulence factor Mce family protein [Mycobacterium sp. str. KMS]                                        | 62.3  | 364 | 369 |
| fig 6666666.28482.peg.539 | R006585 | (gi:126434224) mce3E (Mjls 1631) - virulence factor Mce family protein [Mycobacterium sp. str. JLS]                                        | 62.3  | 364 | 369 |
| fig 6666666.28482.peg.539 | R006577 | (gi:145221247) mce3E (Mflv 0648) - virulence factor Mce family protein [Mycobacterium gilvum str. PYR-GCK]                                 | 62.3  | 364 | 369 |
| fig 6666666.28482.peg.539 | R006584 | (gi:126436738) mce3E (Mjls 4166) - transcriptional regulator, Fis family [Mycobacterium sp. str. JLS]                                      | 61.37 | 362 | 369 |
| fig 6666666.28482.peg.539 | R019403 | (gi:183982890) mce3E (MMAR 2886) - MCE family lipoprotein LprM [Mycobacterium marinum str. M]                                              | 60.87 | 362 | 369 |
| fig 6666666.28482.peg.539 | R019405 | (gi:340626979) mce3E (MCAN 19861) - putative MCE-family lipoprotein LPRM [Mycobacterium canettii str. CIPT 140010059]                      | 60.86 | 366 | 369 |
| fig 6666666.28482.peg.539 | R019406 | (gi:253798982) mce3E (TBMG 02020) - MCE-family lipoprotein mce3E [Mycobacterium tuberculosis str. KZN 1435]                                | 60.59 | 366 | 369 |
| fig 6666666.28482.peg.539 | R006568 | (gi:15609107) mce3E (Rv1970) - POSSIBLE MCE-FAMILY LIPOPROTEIN LPRM (MCE-FAMILY LIPOPROTEIN MCE3E) [Mycobacterium tuberculosis str. H37Rv] | 60.59 | 366 | 369 |
| fig 6666666.28482.peg.539 | R006569 | (gi:148661779) mce3E (MRA 1981) - MCE-family lipoprotein LprM [Mycobacterium tuberculosis str. H37Ra]                                      | 60.59 | 366 | 369 |
| fig 6666666.28482.peg.539 | R013528 | (gi:148823184) mce3E (TBFG 12001) - MCE-family lipoprotein lprM (MCE-family lipoprotein mce3e) [Mycobacterium tuberculosis str. F11]       | 60.59 | 366 | 369 |



|                           |         |                                                                                                                 |       |     |     |
|---------------------------|---------|-----------------------------------------------------------------------------------------------------------------|-------|-----|-----|
| fig 6666666.28482.peg.539 | R006570 | (gi:15841445) mce3E (MT2022) - virulence factor mce family protein [Mycobacterium tuberculosis str. CDC1551]    | 60.59 | 366 | 369 |
| fig 6666666.28482.peg.539 | R006575 | (gi:118468700) mce3E (MSMEG 0350) - virulence factor Mce family protein [Mycobacterium smegmatis str. MC2 155]  | 60.89 | 357 | 369 |
| fig 6666666.28482.peg.539 | R006572 | (gi:118463194) mce3E (MAV 2536) - virulence factor Mce family protein [Mycobacterium avium str. 104]            | 61.84 | 353 | 369 |
| fig 6666666.28482.peg.539 | R006583 | (gi:120405552) mce3E (Mvan 4600) - virulence factor Mce family protein [Mycobacterium vanbaalenii str. PYR-1]   | 61.13 | 366 | 369 |
| fig 6666666.28482.peg.539 | R006576 | (gi:145222693) mce3E (Mflv 2105) - virulence factor Mce family protein [Mycobacterium gilvum str. PYR-GCK]      | 61.83 | 366 | 369 |
| fig 6666666.28482.peg.540 | R006550 | (gi:118465334) mce3D (MAV 2064) - virulence factor mce family protein [Mycobacterium avium str. 104]            | 78.7  | 446 | 446 |
| fig 6666666.28482.peg.540 | R006548 | (gi:41408211) mce3D (MAP2113c) - hypothetical protein [Mycobacterium avium str. K-10 (subsp. paratuberculosis)] | 78.7  | 446 | 446 |
| fig 6666666.28482.peg.540 | R006549 | (gi:118466668) mce3D (MAV 2535) - virulence factor mce family protein [Mycobacterium avium str. 104]            | 61.6  | 362 | 446 |
| fig 6666666.28482.peg.540 | R019400 | (gi:183984025) mce3D (MMAR 4054) - MCE-family protein Mce3D 1 [Mycobacterium marinum str. M]                    | 61.17 | 358 | 446 |
| fig 6666666.28482.peg.541 | R006525 | (gi:41408212) mce3C (MAP2114c) - hypothetical protein [Mycobacterium avium str. K-10 (subsp. paratuberculosis)] | 83.33 | 360 | 390 |
| fig 6666666.28482.peg.541 | R006527 | (gi:118466040) mce3C (MAV 2063) - virulence factor Mce family protein [Mycobacterium avium str. 104]            | 85.22 | 345 | 390 |
| fig 6666666.28482.peg.542 | R006503 | (gi:41408213) mce3B (MAP2115c) - hypothetical protein [Mycobacterium avium str. K-10 (subsp. paratuberculosis)] | 90.24 | 338 | 338 |
| fig 6666666.28482.peg.542 | R006505 | (gi:118466491) mce3B (MAV 2062) - virulence factor Mce family protein [Mycobacterium avium str. 104]            | 89.94 | 338 | 338 |
| fig 6666666.28482.peg.542 | R006508 | (gi:145222690) mce3B (Mflv 2102) - virulence factor Mce family protein [Mycobacterium gilvum str. PYR-GCK]      | 60.06 | 332 | 338 |
| fig 6666666.28482.peg.543 | R006480 | (gi:41408214) mce3A (MAP2116c) - Mce3 [Mycobacterium avium str. K-10 (subsp. paratuberculosis)]                 | 84.36 | 422 | 422 |
| fig 6666666.28482.peg.543 | R006482 | (gi:118467175) mce3A (MAV 2061) - virulence factor Mce family protein [Mycobacterium avium str. 104]            | 84.36 | 422 | 422 |

|                           |         |                                                                                                               |       |    |    |
|---------------------------|---------|---------------------------------------------------------------------------------------------------------------|-------|----|----|
| fig 6666666.28482.peg.559 | R019862 | (gi:183982677) PE18 (MMAR 2670) - PE family protein, PE19 1 [Mycobacterium marinum str. M]                    | 73.56 | 87 | 99 |
| fig 6666666.28482.peg.559 | R018659 | (gi:118618471) PE18 (MUL 3088) - PE family protein [Mycobacterium ulcerans str. Agy99]                        | 72.41 | 87 | 99 |
| fig 6666666.28482.peg.559 | R018680 | (gi:41407605) PE19 (MAP1507) - hypothetical protein [Mycobacterium avium str. K-10 (subsp. paratuberculosis)] | 73.56 | 87 | 99 |
| fig 6666666.28482.peg.559 | R019877 | (gi:183982680) PE19 (MMAR 2673) - PE family protein, PE19 [Mycobacterium marinum str. M]                      | 77.01 | 87 | 99 |
| fig 6666666.28482.peg.559 | R019865 | (gi:253799172) PE18 (TBMG 02209) - PE family protein [Mycobacterium tuberculosis str. KZN 1435]               | 73.56 | 87 | 99 |
| fig 6666666.28482.peg.559 | R018654 | (gi:57116910) PE18 (Rv1788) - PE family protein [Mycobacterium tuberculosis str. H37Rv]                       | 73.56 | 87 | 99 |
| fig 6666666.28482.peg.559 | R018655 | (gi:148661595) PE18 (MRA 1802) - PE family protein [Mycobacterium tuberculosis str. H37Ra]                    | 73.56 | 87 | 99 |
| fig 6666666.28482.peg.559 | R018653 | (gi:148823003) PE18 (TBFG 11818) - PE family protein [Mycobacterium tuberculosis str. F11]                    | 73.56 | 87 | 99 |
| fig 6666666.28482.peg.559 | R018656 | (gi:15841256) PE18 (MT1837) - PE family protein [Mycobacterium tuberculosis str. CDC1551]                     | 73.56 | 87 | 99 |
| fig 6666666.28482.peg.559 | R019864 | (gi:340626800) PE18 (MCAN 18061) - PE family protein [Mycobacterium canettii str. CIPT 140010059]             | 73.56 | 87 | 99 |
| fig 6666666.28482.peg.559 | R019866 | (gi:224990173) PE18 (JTY 1804) - PE family protein [Mycobacterium bovis str. BCG str. Tokyo 172]              | 73.56 | 87 | 99 |
| fig 6666666.28482.peg.559 | R018658 | (gi:121637689) PE18 (BCG 1820) - PE family protein [Mycobacterium bovis str. BCG Pasteur 1173P2]              | 73.56 | 87 | 99 |
| fig 6666666.28482.peg.559 | R018657 | (gi:31792976) PE18 (Mb1816) - PE family protein [Mycobacterium bovis str. AF2122/97]                          | 73.56 | 87 | 99 |
| fig 6666666.28482.peg.559 | R019863 | (gi:339631842) PE18 (MAF 18100) - PE family protein [Mycobacterium africanum str. GM041182]                   | 73.56 | 87 | 99 |
| fig 6666666.28482.peg.559 | R019880 | (gi:253799168) PE19 (TBMG 02205) - PE family protein [Mycobacterium tuberculosis str. KZN 1435]               | 73.56 | 87 | 99 |
| fig 6666666.28482.peg.559 | R018674 | (gi:148823006) PE19 (TBFG 11821) - PE family protein [Mycobacterium tuberculosis str. F11]                    | 73.56 | 87 | 99 |

|                           |         |                                                                                                                |       |     |     |
|---------------------------|---------|----------------------------------------------------------------------------------------------------------------|-------|-----|-----|
| fig 6666666.28482.peg.559 | R018677 | (gi:15841261) PE19 (MT1840) - PE family protein [Mycobacterium tuberculosis str. CDC1551]                      | 73.56 | 87  | 99  |
| fig 6666666.28482.peg.559 | R018675 | (gi:57116913) PE19 (Rv1791) - PE family protein [Mycobacterium tuberculosis str. H37Rv]                        | 73.56 | 87  | 99  |
| fig 6666666.28482.peg.559 | R018676 | (gi:148661598) PE19 (MRA 1805) - PE family protein [Mycobacterium tuberculosis str. H37Ra]                     | 73.56 | 87  | 99  |
| fig 6666666.28482.peg.559 | R019879 | (gi:340626803) PE19 (MCAN 18091) - PE family protein [Mycobacterium canettii str. CIPT 140010059]              | 73.56 | 87  | 99  |
| fig 6666666.28482.peg.559 | R019881 | (gi:224990176) PE19 (JTY 1807) - PE family protein [Mycobacterium bovis str. BCG str. Tokyo 172]               | 73.56 | 87  | 99  |
| fig 6666666.28482.peg.559 | R018679 | (gi:121637692) PE19 (BCG 1823) - PE family protein [Mycobacterium bovis str. BCG Pasteur 1173P2]               | 73.56 | 87  | 99  |
| fig 6666666.28482.peg.559 | R018678 | (gi:31792979) PE19 (Mb1819) - PE family protein [Mycobacterium bovis str. AF2122/97]                           | 73.56 | 87  | 99  |
| fig 6666666.28482.peg.559 | R019878 | (gi:339631845) PE19 (MAF 18130) - PE family protein [Mycobacterium africanum str. GM041182]                    | 73.56 | 87  | 99  |
| fig 6666666.28482.peg.559 | R019867 | (gi:333990534) PE18 (JDM601 1894) - PE-PGRS family protein [Mycobacterium sp. str. JDM601]                     | 70.11 | 87  | 99  |
| fig 6666666.28482.peg.694 | R019488 | (gi:183984673) mce7F (MMAR 4705) - MCE-family protein [Mycobacterium marinum str. M]                           | 78.71 | 559 | 559 |
| fig 6666666.28482.peg.694 | R006783 | (gi:118463631) mce7F (MAV 0953) - mce-family protein mce1f [Mycobacterium avium str. 104]                      | 67.88 | 559 | 559 |
| fig 6666666.28482.peg.694 | R006782 | (gi:41406863) mce7F (MAP0765) - hypothetical protein [Mycobacterium avium str. K-10 (subsp. paratuberculosis)] | 67.76 | 559 | 559 |
| fig 6666666.28482.peg.694 | R006826 | (gi:41408292) mce8F (MAP2194) - hypothetical protein [Mycobacterium avium str. K-10 (subsp. paratuberculosis)] | 69.72 | 436 | 559 |
| fig 6666666.28482.peg.694 | R006828 | (gi:145225111) mce8F (Mflv 4533) - virulence factor Mce family protein [Mycobacterium gilvum str. PYR-GCK]     | 65.98 | 434 | 559 |
| fig 6666666.28482.peg.694 | R006790 | (gi:108800632) mce7F (Mmcs 3666) - Mammalian cell entry [Mycobacterium sp. str. MCS]                           | 64.03 | 441 | 559 |
| fig 6666666.28482.peg.694 | R006789 | (gi:119869771) mce7F (Mkms 3739) - virulence factor Mce family protein [Mycobacterium sp. str. KMS]            | 64.03 | 441 | 559 |

|                           |         |                                                                                                                                      |       |     |     |
|---------------------------|---------|--------------------------------------------------------------------------------------------------------------------------------------|-------|-----|-----|
| fig 6666666.28482.peg.694 | R006788 | (gi:126436256) mce7F (Mjls 3679) - virulence factor Mce family protein [Mycobacterium sp. str. JLS]                                  | 64.03 | 441 | 559 |
| fig 6666666.28482.peg.706 | R005289 | (gi:41407336) ddrA (MAP1238c) - DrrA [Mycobacterium avium str. K-10 (subsp. paratuberculosis)]                                       | 67.54 | 305 | 309 |
| fig 6666666.28482.peg.706 | R005290 | (gi:118466584) ddrA (MAV 3250) - daunorubicin resistance ATP-binding protein DrrA [Mycobacterium avium str. 104]                     | 67.21 | 305 | 309 |
| fig 6666666.28482.peg.770 | R005764 | (gi:41408029) trpD (MAP1931c) - anthranilate phosphoribosyltransferase [Mycobacterium avium str. K-10 (subsp. paratuberculosis)]     | 86.53 | 349 | 360 |
| fig 6666666.28482.peg.770 | R005765 | (gi:118464588) trpD (MAV 2301) - anthranilate phosphoribosyltransferase [Mycobacterium avium str. 104]                               | 86.82 | 349 | 360 |
| fig 6666666.28482.peg.770 | R005768 | (gi:118469185) trpD (MSMEG 4258) - anthranilate phosphoribosyltransferase [Mycobacterium smegmatis str. MC2 155]                     | 81.3  | 353 | 360 |
| fig 6666666.28482.peg.770 | R018988 | (gi:183983227) trpD (MMAR 3236) - anthranilate phosphoribosyltransferase [Mycobacterium marinum str. M]                              | 84.35 | 345 | 360 |
| fig 6666666.28482.peg.770 | R005767 | (gi:118618834) trpD (MUL 3549) - anthranilate phosphoribosyltransferase TrpD [Mycobacterium ulcerans str. Agy99]                     | 84.06 | 345 | 360 |
| fig 6666666.28482.peg.770 | R018992 | (gi:253798743) trpD (TBMG 01789) - anthranilate phosphoribosyltransferase [Mycobacterium tuberculosis str. KZN 1435]                 | 86.13 | 346 | 360 |
| fig 6666666.28482.peg.770 | R005759 | (gi:15609329) trpD (Rv2192c) - anthranilate phosphoribosyltransferase [Mycobacterium tuberculosis str. H37Rv]                        | 86.13 | 346 | 360 |
| fig 6666666.28482.peg.770 | R005760 | (gi:148662009) trpD (MRA 2208) - anthranilate phosphoribosyltransferase [Mycobacterium tuberculosis str. H37Ra]                      | 86.13 | 346 | 360 |
| fig 6666666.28482.peg.770 | R013454 | (gi:148823399) trpD (TBFG 12220) - anthranilate phosphoribosyltransferase trpD [Mycobacterium tuberculosis str. F11]                 | 86.13 | 346 | 360 |
| fig 6666666.28482.peg.770 | R018991 | (gi:340627197) trpD (MCAN 22141) - putative anthranilate phosphoribosyltransferase TrpD [Mycobacterium canettii str. CIPT 140010059] | 86.13 | 346 | 360 |
| fig 6666666.28482.peg.770 | R018993 | (gi:224990567) trpD (JTY 2202) - anthranilate phosphoribosyltransferase [Mycobacterium bovis str. BCG str. Tokyo 172]                | 86.13 | 346 | 360 |
| fig 6666666.28482.peg.770 | R005763 | (gi:121638073) trpD (BCG 2208c) - putative anthranilate phosphoribosyltransferase TrpD [Mycobacterium bovis str. BCG Pasteur 1173P2] | 86.13 | 346 | 360 |

|                           |         |                                                                                                                                |       |     |     |
|---------------------------|---------|--------------------------------------------------------------------------------------------------------------------------------|-------|-----|-----|
| fig 6666666.28482.peg.770 | R005762 | (gi:31793371) trpD (Mb2215c) - anthranilate phosphoribosyltransferase [Mycobacterium bovis str. AF2122/97]                     | 86.13 | 346 | 360 |
| fig 6666666.28482.peg.770 | R018990 | (gi:339632220) trpD (MAF 22030) - putative anthranilate phosphoribosyltransferase TrpD [Mycobacterium africanum str. GM041182] | 86.13 | 346 | 360 |
| fig 6666666.28482.peg.770 | R005761 | (gi:15841683) trpD (MT2248) - anthranilate phosphoribosyltransferase [Mycobacterium tuberculosis str. CDC1551]                 | 86.13 | 346 | 360 |
| fig 6666666.28482.peg.770 | R005766 | (gi:15827406) trpD (ML0883) - anthranilate phosphoribosyltransferase [Mycobacterium leprae str. TN]                            | 79.51 | 360 | 360 |
| fig 6666666.28482.peg.770 | R018994 | (gi:221229883) trpD (MLBr 00883) - anthranilate phosphoribosyltransferase [Mycobacterium leprae str. Br4923]                   | 79.51 | 360 | 360 |
| fig 6666666.28482.peg.770 | R005770 | (gi:120404527) trpD (Mvan 3556) - anthranilate phosphoribosyltransferase [Mycobacterium vanbaalenii str. PYR-1]                | 79.72 | 359 | 360 |
| fig 6666666.28482.peg.770 | R005771 | (gi:126435879) trpD (Mjls 3301) - anthranilate phosphoribosyltransferase [Mycobacterium sp. str. JLS]                          | 79.89 | 348 | 360 |
| fig 6666666.28482.peg.770 | R005773 | (gi:108800256) trpD (Mmcs 3290) - anthranilate phosphoribosyltransferase [Mycobacterium sp. str. MCS]                          | 79.89 | 348 | 360 |
| fig 6666666.28482.peg.770 | R005772 | (gi:119869384) trpD (Mkms 3352) - anthranilate phosphoribosyltransferase [Mycobacterium sp. str. KMS]                          | 79.89 | 348 | 360 |
| fig 6666666.28482.peg.770 | R005769 | (gi:145223544) trpD (Mflv 2957) - anthranilate phosphoribosyltransferase [Mycobacterium gilvum str. PYR-GCK]                   | 79.14 | 350 | 360 |
| fig 6666666.28482.peg.770 | R018989 | (gi:169629057) trpD (MAB 1970) - anthranilate phosphoribosyltransferase [Mycobacterium abscessus str. ATCC 19977]              | 76.79 | 345 | 360 |
| fig 6666666.28482.peg.907 | R005991 | (gi:41408511) irtB (MAP2413c) - hypothetical protein [Mycobacterium avium str. K-10 (subsp. paratuberculosis)]                 | 83.16 | 576 | 582 |
| fig 6666666.28482.peg.907 | R005992 | (gi:118467076) irtB (MAV 1567) - ABC transporter, ATP-binding protein [Mycobacterium avium str. 104]                           | 82.64 | 576 | 582 |
| fig 6666666.28482.peg.907 | R019135 | (gi:183984007) irtB (MMAR 4036) - transmembrane ATP-binding protein ABC transporter [Mycobacterium marinum str. M]             | 78.3  | 576 | 582 |
| fig 6666666.28482.peg.907 | R005993 | (gi:118619112) irtB (MUL 3901) - transmembrane ATP-binding protein ABC transporter [Mycobacterium ulcerans str. Agy99]         | 78.12 | 576 | 582 |

|                           |         |                                                                                                                                                            |       |     |     |
|---------------------------|---------|------------------------------------------------------------------------------------------------------------------------------------------------------------|-------|-----|-----|
| fig 6666666.28482.peg.907 | R019139 | (gi:253799603) irtB (TBMG 02629) - drugs-transport transmembrane ATP-binding protein ABC transporter [Mycobacterium tuberculosis str. KZN 1435]            | 78.3  | 576 | 582 |
| fig 6666666.28482.peg.907 | R005986 | (gi:15608489) irtB (Rv1349) - PROBABLE DRUGS-TRANSPORT TRANSMEMBRANE ATP-BINDING PROTEIN ABC TRANSPORTER [Mycobacterium tuberculosis str. H37Rv]           | 78.3  | 576 | 582 |
| fig 6666666.28482.peg.907 | R013471 | (gi:148822570) irtB (TBFG 11379) - hypothetical drugs-transport transmembrane ATP-binding protein ABC transporter [Mycobacterium tuberculosis str. F11]    | 78.3  | 576 | 582 |
| fig 6666666.28482.peg.907 | R005988 | (gi:15840804) irtB (MT1392) - ABC transporter, ATP-binding protein [Mycobacterium tuberculosis str. CDC1551]                                               | 78.3  | 576 | 582 |
| fig 6666666.28482.peg.907 | R019138 | (gi:340626365) irtB (MCAN 13671) - putative drugs-transport transmembrane ATP-binding protein ABC transporter [Mycobacterium canettii str. CIPT 140010059] | 78.3  | 576 | 582 |
| fig 6666666.28482.peg.907 | R019140 | (gi:224989754) irtB (JTY 1385) - putative drugs-transport transmembrane ATP-binding protein ABC transporter [Mycobacterium bovis str. BCG str. Tokyo 172]  | 78.3  | 576 | 582 |
| fig 6666666.28482.peg.907 | R005990 | (gi:121637280) irtB (BCG 1411) - putative drugs-transport transmembrane ATP-binding protein ABC transporter [Mycobacterium bovis str. BCG Pasteur 1173P2]  | 78.3  | 576 | 582 |
| fig 6666666.28482.peg.907 | R005989 | (gi:31792545) irtB (Mb1384) - PROBABLE DRUGS-TRANSPORT TRANSMEMBRANE ATP-BINDING PROTEIN ABC TRANSPORTER [Mycobacterium bovis str. AF2122/97]              | 78.3  | 576 | 582 |
| fig 6666666.28482.peg.907 | R019137 | (gi:339631418) irtB (MAF 13730) - putative drugs-transport transmembrane ATP-binding protein ABC transporter [Mycobacterium africanum str. GM041182]       | 78.3  | 576 | 582 |
| fig 6666666.28482.peg.907 | R019141 | (gi:333990176) irtB (JDM601 1536) - transmembrane ATP-binding protein ABC transporter [Mycobacterium sp. str. JDM601]                                      | 74.91 | 582 | 582 |
| fig 6666666.28482.peg.907 | R005994 | (gi:118469265) irtB (MSMEG 6553) - ABC transporter ATP-binding protein [Mycobacterium smegmatis str. MC2 155]                                              | 71.53 | 576 | 582 |
| fig 6666666.28482.peg.908 | R005982 | (gi:41408512) irtA (MAP2414c) - hypothetical protein [Mycobacterium avium str. K-10 (subsp. paratuberculosis)]                                             | 84.23 | 856 | 856 |

|                           |         |                                                                                                                                                            |       |     |     |
|---------------------------|---------|------------------------------------------------------------------------------------------------------------------------------------------------------------|-------|-----|-----|
| fig 6666666.28482.peg.908 | R005983 | (gi:118462514) irtA (MAV 1566) - putative ABC transporter ATP-binding protein [Mycobacterium avium str. 104]                                               | 84.47 | 849 | 856 |
| fig 6666666.28482.peg.908 | R005984 | (gi:118619113) irtA (MUL 3902) - transmembrane ATP-binding protein ABC transporter [Mycobacterium ulcerans str. Agy99]                                     | 79.09 | 856 | 856 |
| fig 6666666.28482.peg.908 | R019128 | (gi:183984008) irtA (MMAR 4037) - transmembrane ATP-binding protein ABC transporter [Mycobacterium marinum str. M]                                         | 79.09 | 856 | 856 |
| fig 6666666.28482.peg.908 | R019132 | (gi:253799604) irtA (TBMG 02630) - drugs-transport transmembrane ATP-binding protein ABC transporter [Mycobacterium tuberculosis str. KZN 1435]            | 82.27 | 856 | 856 |
| fig 6666666.28482.peg.908 | R005977 | (gi:15608488) irtA (Rv1348) - PROBABLE DRUGS-TRANSPORT TRANSMEMBRANE ATP-BINDING PROTEIN ABC TRANSPORTER [Mycobacterium tuberculosis str. H37Rv]           | 82.27 | 856 | 856 |
| fig 6666666.28482.peg.908 | R013470 | (gi:148822569) irtA (TBFG 11378) - hypothetical drugs-transport transmembrane ATP-binding protein ABC transporter [Mycobacterium tuberculosis str. F11]    | 82.27 | 856 | 856 |
| fig 6666666.28482.peg.908 | R005979 | (gi:15840803) irtA (MT1390) - ABC transporter, ATP-binding protein [Mycobacterium tuberculosis str. CDC1551]                                               | 82.27 | 856 | 856 |
| fig 6666666.28482.peg.908 | R019133 | (gi:224989753) irtA (JTY 1384) - putative drugs-transport transmembrane ATP-binding protein ABC transporter [Mycobacterium bovis str. BCG str. Tokyo 172]  | 82.27 | 856 | 856 |
| fig 6666666.28482.peg.908 | R005981 | (gi:121637279) irtA (BCG 1410) - putative drugs-transport transmembrane ATP-binding protein ABC transporter [Mycobacterium bovis str. BCG Pasteur 1173P2]  | 82.27 | 856 | 856 |
| fig 6666666.28482.peg.908 | R005980 | (gi:31792544) irtA (Mb1383) - PROBABLE DRUGS-TRANSPORT TRANSMEMBRANE ATP-BINDING PROTEIN ABC TRANSPORTER [Mycobacterium bovis str. AF2122/97]              | 82.27 | 856 | 856 |
| fig 6666666.28482.peg.908 | R019131 | (gi:340626364) irtA (MCAN 13661) - putative drugs-transport transmembrane ATP-binding protein ABC transporter [Mycobacterium canettii str. CIPT 140010059] | 82.16 | 856 | 856 |
| fig 6666666.28482.peg.908 | R019130 | (gi:339631417) irtA (MAF 13720) - putative drugs-transport transmembrane ATP-binding protein ABC transporter [Mycobacterium africanum str. GM041182]       | 82.16 | 856 | 856 |

|                           |         |                                                                                                                                       |       |     |     |
|---------------------------|---------|---------------------------------------------------------------------------------------------------------------------------------------|-------|-----|-----|
| fig 6666666.28482.peg.908 | R005985 | (gi:118470205) irtA (MSMEG 6554) - hypothetical ABC transporter ATP-binding protein [Mycobacterium smegmatis str. MC2 155]            | 74.01 | 856 | 856 |
| fig 6666666.28482.peg.908 | R019134 | (gi:333990175) irtA (JDM601 1535) - transmembrane ATP-binding protein ABC transporter [Mycobacterium sp. str. JDM601]                 | 78.05 | 841 | 856 |
| fig 6666666.28482.peg.908 | R019129 | (gi:169629348) irtA (MAB 2262c) - ABC transporter ATP-binding protein [Mycobacterium abscessus str. ATCC 19977]                       | 64.81 | 852 | 856 |
| fig 6666666.28482.peg.966 | R005795 | (gi:118464128) lysA (MAV 1508) - diaminopimelate decarboxylase [Mycobacterium avium str. 104]                                         | 88.35 | 472 | 472 |
| fig 6666666.28482.peg.966 | R005794 | (gi:41408567) lysA (MAP2469c) - LysA 2 [Mycobacterium avium str. K-10 (subsp. paratuberculosis)]                                      | 88.35 | 472 | 472 |
| fig 6666666.28482.peg.966 | R019003 | (gi:183984075) lysA (MMAR 4104) - diaminopimelate decarboxylase LysA [Mycobacterium marinum str. M]                                   | 87.29 | 472 | 472 |
| fig 6666666.28482.peg.966 | R005797 | (gi:118619175) lysA (MUL 3971) - diaminopimelate decarboxylase LysA [Mycobacterium ulcerans str. Agy99]                               | 86.86 | 472 | 472 |
| fig 6666666.28482.peg.966 | R005796 | (gi:15827559) lysA (ML1128) - diaminopimelate decarboxylase [Mycobacterium leprae str. TN]                                            | 83.05 | 472 | 472 |
| fig 6666666.28482.peg.966 | R019009 | (gi:221230036) lysA (MLBr 01128) - diaminopimelate decarboxylase [Mycobacterium leprae str. Br4923]                                   | 83.05 | 472 | 472 |
| fig 6666666.28482.peg.966 | R019007 | (gi:253799661) lysA (TBMG 02687) - diaminopimelate decarboxylase lysA [Mycobacterium tuberculosis str. KZN 1435]                      | 85.2  | 446 | 472 |
| fig 6666666.28482.peg.966 | R005789 | (gi:15608433) lysA (Rv1293) - PROBABLE DIAMINOPIMELATE DECARBOXYLASE LYSA (DAP DECARBOXYLASE) [Mycobacterium tuberculosis str. H37Rv] | 85.2  | 446 | 472 |
| fig 6666666.28482.peg.966 | R005790 | (gi:148661081) lysA (MRA 1301) - diaminopimelate decarboxylase [Mycobacterium tuberculosis str. H37Ra]                                | 85.2  | 446 | 472 |
| fig 6666666.28482.peg.966 | R013456 | (gi:148822511) lysA (TBFG 11320) - diaminopimelate decarboxylase lysA (dap decarboxylase) [Mycobacterium tuberculosis str. F11]       | 85.2  | 446 | 472 |
| fig 6666666.28482.peg.966 | R005791 | (gi:15840743) lysA (MT1332) - diaminopimelate decarboxylase [Mycobacterium tuberculosis str. CDC1551]                                 | 85.2  | 446 | 472 |
| fig 6666666.28482.peg.966 | R019006 | (gi:340626309) lysA (MCAN 13101) - putative diaminopimelate decarboxylase LYSA [Mycobacterium canettii str. CIPT 140010059]           | 85.2  | 446 | 472 |
| fig 6666666.28482.peg.966 | R019008 | (gi:224989697) lysA (JTY 1328) - putative diaminopimelate decarboxylase [Mycobacterium bovis str. BCG str. Tokyo 172]                 | 85.2  | 446 | 472 |



|                            |         |                                                                                                                                           |       |     |     |
|----------------------------|---------|-------------------------------------------------------------------------------------------------------------------------------------------|-------|-----|-----|
| fig 6666666.28482.peg.966  | R005793 | (gi:121637222) lysA (BCG 1353) - putative diaminopimelate decarboxylase lysA [Mycobacterium bovis str. BCG Pasteur 1173P2]                | 85.2  | 446 | 472 |
| fig 6666666.28482.peg.966  | R005792 | (gi:31792486) lysA (Mb1325) - PROBABLE DIAMINOPIMELATE DECARBOXYLASE LYSA (DAP DECARBOXYLASE) [Mycobacterium bovis str. AF2122/97]        | 85.2  | 446 | 472 |
| fig 6666666.28482.peg.966  | R019005 | (gi:339631362) lysA (MAF 13150) - putative diaminopimelate decarboxylase LYSA (DAP decarboxylase) [Mycobacterium africanum str. GM041182] | 85.2  | 446 | 472 |
| fig 6666666.28482.peg.966  | R005798 | (gi:118467936) lysA (MSMEG 4958) - diaminopimelate decarboxylase [Mycobacterium smegmatis str. MC2 155]                                   | 80.3  | 472 | 472 |
| fig 6666666.28482.peg.966  | R005803 | (gi:108800861) lysA (Mmcs 3897) - diaminopimelate decarboxylase [Mycobacterium sp. str. MCS]                                              | 78.13 | 471 | 472 |
| fig 6666666.28482.peg.966  | R005802 | (gi:119870001) lysA (Mkms 3971) - diaminopimelate decarboxylase [Mycobacterium sp. str. KMS]                                              | 78.13 | 471 | 472 |
| fig 6666666.28482.peg.966  | R005801 | (gi:126436459) lysA (Mjls 3883) - diaminopimelate decarboxylase [Mycobacterium sp. str. JLS]                                              | 77.92 | 471 | 472 |
| fig 6666666.28482.peg.966  | R019010 | (gi:333989932) lysA (JDM601 1292) - diaminopimelate decarboxylase LysA [Mycobacterium sp. str. JDM601]                                    | 79.24 | 472 | 472 |
| fig 6666666.28482.peg.966  | R005800 | (gi:120405303) lysA (Mvan 4349) - diaminopimelate decarboxylase [Mycobacterium vanbaalenii str. PYR-1]                                    | 77.28 | 471 | 472 |
| fig 6666666.28482.peg.966  | R005799 | (gi:145222885) lysA (Mflv 2297) - diaminopimelate decarboxylase [Mycobacterium gilvum str. PYR-GCK]                                       | 78.18 | 472 | 472 |
| fig 6666666.28482.peg.966  | R019004 | (gi:169628525) lysA (MAB 1434) - diaminopimelate decarboxylase [Mycobacterium abscessus str. ATCC 19977]                                  | 71.82 | 471 | 472 |
| fig 6666666.28482.peg.1024 | R018895 | (gi:340625435) pknG (MCAN 04081) - serine/threonine-protein kinase PKNG [Mycobacterium canettii str. CIPT 140010059]                      | 87.2  | 742 | 752 |
| fig 6666666.28482.peg.1024 | R018896 | (gi:253797333) pknG (TBMG 00411) - serine/threonine-protein kinase pknG [Mycobacterium tuberculosis str. KZN 1435]                        | 87.47 | 742 | 752 |
| fig 6666666.28482.peg.1024 | R005495 | (gi:15607551) pknG (Rv0410c) - SERINE/THREONINE-PROTEIN KINASE PKNG (PROTEIN KINASE G) (STPK G) [Mycobacterium tuberculosis str. H37Rv]   | 87.47 | 742 | 752 |
| fig 6666666.28482.peg.1024 | R005496 | (gi:148660175) pknG (MRA 0416) - serine/threonine protein kinase [Mycobacterium tuberculosis str. H37Ra]                                  | 87.47 | 742 | 752 |

|                            |         |                                                                                                                                            |       |     |     |
|----------------------------|---------|--------------------------------------------------------------------------------------------------------------------------------------------|-------|-----|-----|
| fig 6666666.28482.peg.1024 | R013430 | (gi:148821606) pknG (TBFG 10415) - serine/threonine-protein kinase pknG [Mycobacterium tuberculosis str. F11]                              | 87.47 | 742 | 752 |
| fig 6666666.28482.peg.1024 | R018897 | (gi:224988796) pknG (JTY 0419) - serine/threonine-protein kinase [Mycobacterium bovis str. BCG str. Tokyo 172]                             | 87.47 | 742 | 752 |
| fig 6666666.28482.peg.1024 | R005499 | (gi:121636324) pknG (BCG 0449c) - Serine/threonine-protein kinase pknG [Mycobacterium bovis str. BCG Pasteur 1173P2]                       | 87.47 | 742 | 752 |
| fig 6666666.28482.peg.1024 | R005498 | (gi:31791588) pknG (Mb0418c) - SERINE/THREONINE-PROTEIN KINASE PKNG (PROTEIN KINASE G) (STPK G) [Mycobacterium bovis str. AF2122/97]       | 87.47 | 742 | 752 |
| fig 6666666.28482.peg.1024 | R018894 | (gi:339630479) pknG (MAF 04120) - serine/threonine-protein kinase PknG (protein kinase G) (STPK G) [Mycobacterium africanum str. GM041182] | 87.33 | 742 | 752 |
| fig 6666666.28482.peg.1024 | R005497 | (gi:15839796) pknG (MT0423) - serine/threonine protein kinase [Mycobacterium tuberculosis str. CDC1551]                                    | 87.47 | 742 | 752 |
| fig 6666666.28482.peg.1024 | R005500 | (gi:41409991) pknG (MAP3893c) - PknG [Mycobacterium avium str. K-10 (subsp. paratuberculosis)]                                             | 88.09 | 737 | 752 |
| fig 6666666.28482.peg.1024 | R005501 | (gi:118463342) pknG (MAV 4751) - serine/threonine protein kinase PknG [Mycobacterium avium str. 104]                                       | 87.28 | 742 | 752 |
| fig 6666666.28482.peg.1024 | R005502 | (gi:15827075) pknG (ML0304) - putative serine-threonine protein kinase [Mycobacterium leprae str. TN]                                      | 83.59 | 752 | 752 |
| fig 6666666.28482.peg.1024 | R018898 | (gi:221229553) pknG (MLBr 00304) - putative serine-threonine protein kinase [Mycobacterium leprae str. Br4923]                             | 83.59 | 752 | 752 |
| fig 6666666.28482.peg.1024 | R018892 | (gi:183980736) pknG (MMAR 0713) - serine/threonine-protein kinase PknG [Mycobacterium marinum str. M]                                      | 85.58 | 742 | 752 |
| fig 6666666.28482.peg.1024 | R005503 | (gi:118618244) pknG (MUL 2810) - serine/threonine-protein kinase PknG [Mycobacterium ulcerans str. Agy99]                                  | 85.46 | 736 | 752 |
| fig 6666666.28482.peg.1024 | R005506 | (gi:120401718) pknG (Mvan 0703) - protein kinase [Mycobacterium vanbaalenii str. PYR-1]                                                    | 78.44 | 752 | 752 |
| fig 6666666.28482.peg.1024 | R005504 | (gi:118468912) pknG (MSMEG 0786) - serine/threonine protein kinase [Mycobacterium smegmatis str. MC2 155]                                  | 79.24 | 737 | 752 |
| fig 6666666.28482.peg.1024 | R005507 | (gi:126433142) pknG (Mjls 0530) - protein kinase [Mycobacterium sp. str. JLS]                                                              | 77.41 | 750 | 752 |
| fig 6666666.28482.peg.1024 | R005509 | (gi:108797520) pknG (Mmcs 0540) - serine/threonine protein kinase [Mycobacterium sp. str. MCS]                                             | 77.28 | 750 | 752 |

|                            |         |                                                                                                                                                                                      |       |     |     |
|----------------------------|---------|--------------------------------------------------------------------------------------------------------------------------------------------------------------------------------------|-------|-----|-----|
| fig 6666666.28482.peg.1024 | R005508 | (gi:119866606) pknG (Mkms 0552) - protein kinase [Mycobacterium sp. str. KMS]                                                                                                        | 77.28 | 750 | 752 |
| fig 6666666.28482.peg.1024 | R005505 | (gi:145220807) pknG (Mflv 0202) - protein kinase [Mycobacterium gilvum str. PYR-GCK]                                                                                                 | 80.14 | 737 | 752 |
| fig 6666666.28482.peg.1024 | R018899 | (gi:333989021) pknG (JDM601 0381) - serine/threonine-protein kinase [Mycobacterium sp. str. JDM601]                                                                                  | 75.56 | 751 | 752 |
| fig 6666666.28482.peg.1024 | R018893 | (gi:169631302) pknG (MAB 4224) - serine/threonine-protein kinase [Mycobacterium abscessus str. ATCC 19977]                                                                           | 69.18 | 748 | 752 |
| fig 6666666.28482.peg.1222 | R005170 | (gi:15840045) mma4 (MT0670) - methoxy mycolic acid synthase 4 [Mycobacterium tuberculosis str. CDC1551]                                                                              | 78.95 | 304 | 318 |
| fig 6666666.28482.peg.1222 | R018721 | (gi:183980997) mma4 (MMAR 0977) - methoxy mycolic acid synthase 4, MmaA4 [Mycobacterium marinum str. M]                                                                              | 80.87 | 298 | 318 |
| fig 6666666.28482.peg.1222 | R005168 | (gi:15607782) mma4 (Rv0642c) - METHOXY MYCOLIC ACID SYNTHASE 4 MMAA4 (METHYL MYCOLIC ACID SYNTHASE 4) (MMA4) (HYDROXY MYCOLIC ACID SYNTHASE) [Mycobacterium tuberculosis str. H37Rv] | 80    | 300 | 318 |
| fig 6666666.28482.peg.1222 | R005169 | (gi:148660416) mma4 (MRA 0653) - methoxy mycolic acid synthase 4 [Mycobacterium tuberculosis str. H37Ra]                                                                             | 80    | 300 | 318 |
| fig 6666666.28482.peg.1222 | R018723 | (gi:340625661) mma4 (MCAN 06411) - methoxy mycolic acid synthase 4 MMAA4 [Mycobacterium canettii str. CIPT 140010059]                                                                | 80    | 300 | 318 |
| fig 6666666.28482.peg.1222 | R018724 | (gi:253797582) mma4 (TBMG 00653) - methoxy mycolic acid synthase 4 mmaA4 [Mycobacterium tuberculosis str. KZN 1435]                                                                  | 78.95 | 304 | 318 |
| fig 6666666.28482.peg.1222 | R005173 | (gi:41410214) mma4 (MAP4116c) - MmaA4 [Mycobacterium avium str. K-10 (subsp. paratuberculosis)]                                                                                      | 80.47 | 297 | 318 |
| fig 6666666.28482.peg.1222 | R018725 | (gi:224989035) mma4 (JTY 0661) - methoxy mycolic acid synthase 4 [Mycobacterium bovis str. BCG str. Tokyo 172]                                                                       | 79.67 | 300 | 318 |
| fig 6666666.28482.peg.1222 | R005172 | (gi:121636563) mma4 (BCG 0691c) - Methoxy mycolic acid synthase 4 mmaA4 [Mycobacterium bovis str. BCG Pasteur 1173P2]                                                                | 79.67 | 300 | 318 |
| fig 6666666.28482.peg.1222 | R005171 | (gi:31791826) mma4 (Mb0661c) - METHOXY MYCOLIC ACID SYNTHASE 4 MMAA4 (METHYL MYCOLIC ACID SYNTHASE 4) (MMA4) (HYDROXY MYCOLIC ACID SYNTHASE) [Mycobacterium bovis str. AF2122/97]    | 79.67 | 300 | 318 |
| fig 6666666.28482.peg.1222 | R018722 | (gi:339630712) mma4 (MAF 06510) - methoxy mycolic acid synthase 4 MMAA4 (methyl mycolic acid synthase 4) [Mycobacterium africanum str. GM041182]                                     | 79.67 | 300 | 318 |

|                            |         |                                                                                                                          |       |     |     |
|----------------------------|---------|--------------------------------------------------------------------------------------------------------------------------|-------|-----|-----|
| fig 6666666.28482.peg.1222 | R005174 | (gi:118466420) mma4 (MAV 4517) - cyclopropane-fatty-acyl-phospholipid synthase 1 [Mycobacterium avium str. 104]          | 80.13 | 297 | 318 |
| fig 6666666.28482.peg.1222 | R013399 | (gi:148821846) mma4 (TBFG 10655) - methoxy mycolic acid synthase 4 mmaA4 [Mycobacterium tuberculosis str. F11]           | 80.13 | 297 | 318 |
| fig 6666666.28482.peg.1222 | R005176 | (gi:118616517) mma4 (MUL 0729) - methoxy mycolic acid synthase 4, MmaA4 [Mycobacterium ulcerans str. Agy99]              | 79.67 | 300 | 318 |
| fig 6666666.28482.peg.1222 | R005175 | (gi:15828017) mma4 (ML1903) - methyl mycolic acid synthase 4 [Mycobacterium leprae str. TN]                              | 78.45 | 297 | 318 |
| fig 6666666.28482.peg.1222 | R018726 | (gi:221230494) mma4 (MLBr 01903) - methyl mycolic acid synthase 4 [Mycobacterium leprae str. Br4923]                     | 78.45 | 297 | 318 |
| fig 6666666.28482.peg.1222 | R018727 | (gi:333989305) mma4 (JDM601 0665) - methoxy mycolic acid synthase [Mycobacterium sp. str. JDM601]                        | 73.05 | 282 | 318 |
| fig 6666666.28482.peg.1222 | R005181 | (gi:108797925) mma4 (Mmcs 0951) - Cyclopropane-fatty-acyl-phospholipid synthase [Mycobacterium sp. str. MCS]             | 69.15 | 282 | 318 |
| fig 6666666.28482.peg.1222 | R005180 | (gi:119867021) mma4 (Mkms 0969) - Cyclopropane-fatty-acyl-phospholipid synthase [Mycobacterium sp. str. KMS]             | 69.15 | 282 | 318 |
| fig 6666666.28482.peg.1222 | R005179 | (gi:126433581) mma4 (Mjls 0972) - Cyclopropane-fatty-acyl-phospholipid synthase [Mycobacterium sp. str. JLS]             | 68.53 | 284 | 318 |
| fig 6666666.28482.peg.1222 | R005178 | (gi:120402251) mma4 (Mvan 1239) - Cyclopropane-fatty-acyl-phospholipid synthase [Mycobacterium vanbaalenii str. PYR-1]   | 67.14 | 283 | 318 |
| fig 6666666.28482.peg.1222 | R005177 | (gi:145225689) mma4 (Mflv 5113) - Cyclopropane-fatty-acyl-phospholipid synthase [Mycobacterium gilvum str. PYR-GCK]      | 65.72 | 283 | 318 |
| fig 6666666.28482.peg.1300 | R006150 | (gi:41408655) sigE (MAP2557c) - RNA polymerase sigma-70 factor [Mycobacterium avium str. K-10 (subsp. paratuberculosis)] | 82.26 | 248 | 260 |
| fig 6666666.28482.peg.1300 | R006152 | (gi:15827526) sigE (ML1076) - RNA polymerase sigma-70 factor [Mycobacterium leprae str. TN]                              | 81.47 | 255 | 260 |
| fig 6666666.28482.peg.1300 | R019228 | (gi:221230003) sigE (MLBr 01076) - RNA polymerase sigma factor SigE [Mycobacterium leprae str. Br4923]                   | 81.47 | 255 | 260 |
| fig 6666666.28482.peg.1300 | R019226 | (gi:253799735) sigE (TBMG 02761) - RNA polymerase sigma factor SigE [Mycobacterium tuberculosis str. KZN 1435]           | 83.54 | 242 | 260 |
| fig 6666666.28482.peg.1300 | R006145 | (gi:15608361) sigE (Rv1221) - RNA polymerase sigma-70 factor [Mycobacterium tuberculosis str. H37Rv]                     | 83.54 | 242 | 260 |

|                            |         |                                                                                                                              |       |     |     |
|----------------------------|---------|------------------------------------------------------------------------------------------------------------------------------|-------|-----|-----|
| fig 6666666.28482.peg.1300 | R006146 | (gi:148661008) sigE (MRA 1230) - RNA polymerase sigma-70 factor [Mycobacterium tuberculosis str. H37Ra]                      | 83.54 | 242 | 260 |
| fig 6666666.28482.peg.1300 | R013499 | (gi:148822436) sigE (TBFG 11245) - alternative RNA polymerase sigma factor sigE [Mycobacterium tuberculosis str. F11]        | 83.54 | 242 | 260 |
| fig 6666666.28482.peg.1300 | R006147 | (gi:15840665) sigE (MT1259) - RNA polymerase sigma-70 factor [Mycobacterium tuberculosis str. CDC1551]                       | 83.54 | 242 | 260 |
| fig 6666666.28482.peg.1300 | R019225 | (gi:340626234) sigE (MCAN 12351) - alternative RNA polymerase sigma factor SIGE [Mycobacterium canettii str. CIPT 140010059] | 83.54 | 242 | 260 |
| fig 6666666.28482.peg.1300 | R019227 | (gi:224989625) sigE (JTY 1256) - RNA polymerase sigma factor SigE [Mycobacterium bovis str. BCG str. Tokyo 172]              | 83.54 | 242 | 260 |
| fig 6666666.28482.peg.1300 | R006149 | (gi:121637150) sigE (BCG 1281) - Alternative RNA polymerase sigma factor sigE [Mycobacterium bovis str. BCG Pasteur 1173P2]  | 83.54 | 242 | 260 |
| fig 6666666.28482.peg.1300 | R006148 | (gi:31792414) sigE (Mb1253) - RNA polymerase sigma-70 factor [Mycobacterium bovis str. AF2122/97]                            | 83.54 | 242 | 260 |
| fig 6666666.28482.peg.1300 | R019224 | (gi:339631288) sigE (MAF 12400) - alternative RNA polymerase sigma factor SIGE [Mycobacterium africanum str. GM041182]       | 83.54 | 242 | 260 |
| fig 6666666.28482.peg.1300 | R019222 | (gi:183984188) sigE (MMAR 4216) - RNA polymerase sigma factor SigE [Mycobacterium marinum str. M]                            | 84    | 250 | 260 |
| fig 6666666.28482.peg.1300 | R006153 | (gi:118619621) sigE (MUL 4519) - alternative RNA polymerase sigma factor SigE [Mycobacterium ulcerans str. Agy99]            | 84    | 250 | 260 |
| fig 6666666.28482.peg.1300 | R006154 | (gi:118468250) sigE (MSMEG 5072) - extracytoplasmic function alternative sigma factor [Mycobacterium smegmatis str. MC2 155] | 77.73 | 235 | 260 |
| fig 6666666.28482.peg.1300 | R006159 | (gi:108800958) sigE (Mmcs 3994) - RNA polymerase, sigma-24 subunit, ECF subfamily [Mycobacterium sp. str. MCS]               | 86.11 | 212 | 260 |
| fig 6666666.28482.peg.1300 | R006158 | (gi:119870098) sigE (Mkms 4068) - RNA polymerase, sigma-24 subunit, ECF subfamily [Mycobacterium sp. str. KMS]               | 86.11 | 212 | 260 |
| fig 6666666.28482.peg.1300 | R006157 | (gi:126436583) sigE (Mjls 4008) - RNA polymerase, sigma-24 subunit, ECF subfamily [Mycobacterium sp. str. JLS]               | 89.45 | 199 | 260 |
| fig 6666666.28482.peg.1300 | R006155 | (gi:145222788) sigE (Mflv 2200) - RNA polymerase, sigma-24 subunit, ECF subfamily [Mycobacterium gilvum str. PYR-GCK]        | 75    | 239 | 260 |
| fig 6666666.28482.peg.1300 | R006156 | (gi:120405448) sigE (Mvan 4496) - RNA polymerase, sigma-24 subunit, ECF subfamily [Mycobacterium vanbaalenii str. PYR-1]     | 89    | 200 | 260 |

|                            |         |                                                                                                                    |       |     |     |
|----------------------------|---------|--------------------------------------------------------------------------------------------------------------------|-------|-----|-----|
| fig 6666666.28482.peg.1300 | R019229 | (gi:333989835) sigE (JDM601 1195) - RNA polymerase sigma factor SigE [Mycobacterium sp. str. JDM601]               | 81.9  | 217 | 260 |
| fig 6666666.28482.peg.1300 | R019223 | (gi:169628453) sigE (MAB 1362) - alternative RNA polymerase sigma factor [Mycobacterium abscessus str. ATCC 19977] | 69.23 | 244 | 260 |
| fig 6666666.28482.peg.1316 | R014041 | (gi:118464008) esxM (MAV 2922) - hypothetical protein [Mycobacterium avium str. 104]                               | 97.96 | 98  | 98  |
| fig 6666666.28482.peg.1316 | R019810 | (gi:340626804) esxM (MCAN 18101) - ESAT-6 like protein ESXM [Mycobacterium canettii str. CIPT 140010059]           | 87.76 | 98  | 98  |
| fig 6666666.28482.peg.1316 | R019812 | (gi:224990177) esxM (JTY 1808) - hypothetical protein [Mycobacterium bovis str. BCG str. Tokyo 172]                | 87.76 | 98  | 98  |
| fig 6666666.28482.peg.1316 | R014040 | (gi:121637693) esxM (BCG 1824) - hypothetical protein [Mycobacterium bovis str. BCG Pasteur 1173P2]                | 87.76 | 98  | 98  |
| fig 6666666.28482.peg.1316 | R014039 | (gi:31792980) esxM (Mb1820) - hypothetical protein [Mycobacterium bovis str. AF2122/97]                            | 87.76 | 98  | 98  |
| fig 6666666.28482.peg.1316 | R019809 | (gi:339631846) esxM (MAF 18140) - ESAT-6 like protein ESXM [Mycobacterium africanum str. GM041182]                 | 87.76 | 98  | 98  |
| fig 6666666.28482.peg.1316 | R019811 | (gi:253799760) esxM (TBMG 02785) - esat-6 like protein esxK [Mycobacterium tuberculosis str. KZN 1435]             | 86.73 | 98  | 98  |
| fig 6666666.28482.peg.1316 | R019808 | (gi:183982681) esxM (MMAR 2674) - EsaT-6 like protein EsxM [Mycobacterium marinum str. M]                          | 86.46 | 96  | 98  |
| fig 6666666.28482.peg.1316 | R014042 | (gi:118618466) esxM (MUL 3083) - EsaT-6 like protein EsxM [Mycobacterium ulcerans str. Agy99]                      | 84.69 | 96  | 98  |
| fig 6666666.28482.peg.1318 | R014041 | (gi:118464008) esxM (MAV 2922) - hypothetical protein [Mycobacterium avium str. 104]                               | 84.95 | 93  | 93  |
| fig 6666666.28482.peg.1318 | R019811 | (gi:253799760) esxM (TBMG 02785) - esat-6 like protein esxK [Mycobacterium tuberculosis str. KZN 1435]             | 86.02 | 93  | 93  |
| fig 6666666.28482.peg.1318 | R019810 | (gi:340626804) esxM (MCAN 18101) - ESAT-6 like protein ESXM [Mycobacterium canettii str. CIPT 140010059]           | 86.02 | 93  | 93  |
| fig 6666666.28482.peg.1318 | R019812 | (gi:224990177) esxM (JTY 1808) - hypothetical protein [Mycobacterium bovis str. BCG str. Tokyo 172]                | 86.02 | 93  | 93  |
| fig 6666666.28482.peg.1318 | R014040 | (gi:121637693) esxM (BCG 1824) - hypothetical protein [Mycobacterium bovis str. BCG Pasteur 1173P2]                | 86.02 | 93  | 93  |

|                            |         |                                                                                                    |       |    |    |
|----------------------------|---------|----------------------------------------------------------------------------------------------------|-------|----|----|
| fig 6666666.28482.peg.1318 | R014039 | (gi:31792980) esxM (Mb1820) - hypothetical protein [Mycobacterium bovis str. AF2122/97]            | 86.02 | 93 | 93 |
| fig 6666666.28482.peg.1318 | R019809 | (gi:339631846) esxM (MAF 18140) - ESAT-6 like protein ESXM [Mycobacterium africanum str. GM041182] | 86.02 | 93 | 93 |
| fig 6666666.28482.peg.1318 | R019808 | (gi:183982681) esxM (MMAR 2674) - EsaT-6 like protein EsxM [Mycobacterium marinum str. M]          | 82.42 | 91 | 93 |
| fig 6666666.28482.peg.1318 | R014042 | (gi:118618466) esxM (MUL 3083) - EsaT-6 like protein EsxM [Mycobacterium ulcerans str. Agy99]      | 80.65 | 91 | 93 |
| fig 6666666.28482.peg.1340 | R019862 | (gi:183982677) PE18 (MMAR 2670) - PE family protein, PE19 1 [Mycobacterium marinum str. M]         | 63.22 | 87 | 99 |
| fig 6666666.28482.peg.1340 | R018659 | (gi:118618471) PE18 (MUL 3088) - PE family protein [Mycobacterium ulcerans str. Agy99]             | 62.07 | 87 | 99 |
| fig 6666666.28482.peg.1340 | R019865 | (gi:253799172) PE18 (TBMG 02209) - PE family protein [Mycobacterium tuberculosis str. KZN 1435]    | 63.22 | 87 | 99 |
| fig 6666666.28482.peg.1340 | R018654 | (gi:57116910) PE18 (Rv1788) - PE family protein [Mycobacterium tuberculosis str. H37Rv]            | 63.22 | 87 | 99 |
| fig 6666666.28482.peg.1340 | R018655 | (gi:148661595) PE18 (MRA 1802) - PE family protein [Mycobacterium tuberculosis str. H37Ra]         | 63.22 | 87 | 99 |
| fig 6666666.28482.peg.1340 | R018653 | (gi:148823003) PE18 (TBFG 11818) - PE family protein [Mycobacterium tuberculosis str. F11]         | 63.22 | 87 | 99 |
| fig 6666666.28482.peg.1340 | R018656 | (gi:15841256) PE18 (MT1837) - PE family protein [Mycobacterium tuberculosis str. CDC1551]          | 63.22 | 87 | 99 |
| fig 6666666.28482.peg.1340 | R019864 | (gi:340626800) PE18 (MCAN 18061) - PE family protein [Mycobacterium canettii str. CIPT 140010059]  | 63.22 | 87 | 99 |
| fig 6666666.28482.peg.1340 | R019866 | (gi:224990173) PE18 (JTY 1804) - PE family protein [Mycobacterium bovis str. BCG str. Tokyo 172]   | 63.22 | 87 | 99 |
| fig 6666666.28482.peg.1340 | R018658 | (gi:121637689) PE18 (BCG 1820) - PE family protein [Mycobacterium bovis str. BCG Pasteur 1173P2]   | 63.22 | 87 | 99 |
| fig 6666666.28482.peg.1340 | R018657 | (gi:31792976) PE18 (Mb1816) - PE family protein [Mycobacterium bovis str. AF2122/97]               | 63.22 | 87 | 99 |
| fig 6666666.28482.peg.1340 | R019863 | (gi:339631842) PE18 (MAF 18100) - PE family protein [Mycobacterium africanum str. GM041182]        | 63.22 | 87 | 99 |

|                            |         |                                                                                                                                   |       |     |     |
|----------------------------|---------|-----------------------------------------------------------------------------------------------------------------------------------|-------|-----|-----|
| fig 6666666.28482.peg.1340 | R018680 | (gi:41407605) PE19 (MAP1507) - hypothetical protein [Mycobacterium avium str. K-10 (subsp. paratuberculosis)]                     | 63.22 | 87  | 99  |
| fig 6666666.28482.peg.1340 | R019877 | (gi:183982680) PE19 (MMAR 2673) - PE family protein, PE19 [Mycobacterium marinum str. M]                                          | 64.37 | 87  | 99  |
| fig 6666666.28482.peg.1340 | R018675 | (gi:57116913) PE19 (Rv1791) - PE family protein [Mycobacterium tuberculosis str. H37Rv]                                           | 64.37 | 87  | 99  |
| fig 6666666.28482.peg.1340 | R018676 | (gi:148661598) PE19 (MRA 1805) - PE family protein [Mycobacterium tuberculosis str. H37Ra]                                        | 64.37 | 87  | 99  |
| fig 6666666.28482.peg.1340 | R019879 | (gi:340626803) PE19 (MCAN 18091) - PE family protein [Mycobacterium canettii str. CIPT 140010059]                                 | 64.37 | 87  | 99  |
| fig 6666666.28482.peg.1340 | R019881 | (gi:224990176) PE19 (JTY 1807) - PE family protein [Mycobacterium bovis str. BCG str. Tokyo 172]                                  | 64.37 | 87  | 99  |
| fig 6666666.28482.peg.1340 | R018679 | (gi:121637692) PE19 (BCG 1823) - PE family protein [Mycobacterium bovis str. BCG Pasteur 1173P2]                                  | 64.37 | 87  | 99  |
| fig 6666666.28482.peg.1340 | R018678 | (gi:31792979) PE19 (Mb1819) - PE family protein [Mycobacterium bovis str. AF2122/97]                                              | 64.37 | 87  | 99  |
| fig 6666666.28482.peg.1340 | R019878 | (gi:339631845) PE19 (MAF 18130) - PE family protein [Mycobacterium africanum str. GM041182]                                       | 64.37 | 87  | 99  |
| fig 6666666.28482.peg.1340 | R019880 | (gi:253799168) PE19 (TBMG 02205) - PE family protein [Mycobacterium tuberculosis str. KZN 1435]                                   | 64.37 | 87  | 99  |
| fig 6666666.28482.peg.1340 | R018674 | (gi:148823006) PE19 (TBFG 11821) - PE family protein [Mycobacterium tuberculosis str. F11]                                        | 64.37 | 87  | 99  |
| fig 6666666.28482.peg.1340 | R018677 | (gi:15841261) PE19 (MT1840) - PE family protein [Mycobacterium tuberculosis str. CDC1551]                                         | 64.37 | 87  | 99  |
| fig 6666666.28482.peg.1340 | R019867 | (gi:333990534) PE18 (JDM601 1894) - PE-PGRS family protein [Mycobacterium sp. str. JDM601]                                        | 65.52 | 87  | 99  |
| fig 6666666.28482.peg.1555 | R005780 | (gi:118465097) leuD (MAV 3837) - 3-isopropylmalate dehydratase, small subunit [Mycobacterium avium str. 104]                      | 92.93 | 198 | 198 |
| fig 6666666.28482.peg.1555 | R005779 | (gi:41409123) leuD (MAP3025c) - isopropylmalate isomerase small subunit [Mycobacterium avium str. K-10 (subsp. paratuberculosis)] | 92.42 | 198 | 198 |
| fig 6666666.28482.peg.1555 | R005782 | (gi:118617555) leuD (MUL 1969) - 3-isopropylmalate dehydratase (small subunit) LeuD [Mycobacterium ulcerans str. Agy99]           | 91.92 | 198 | 198 |



|                            |         |                                                                                                                                                                   |       |     |     |
|----------------------------|---------|-------------------------------------------------------------------------------------------------------------------------------------------------------------------|-------|-----|-----|
| fig 6666666.28482.peg.1555 | R018995 | (gi:183981740) leuD (MMAR 1727) - isopropylmalate isomerase small subunit [Mycobacterium marinum str. M]                                                          | 91.92 | 198 | 198 |
| fig 6666666.28482.peg.1555 | R018999 | (gi:253797920) leuD (TBMG 00982) - isopropylmalate isomerase small subunit [Mycobacterium tuberculosis str. KZN 1435]                                             | 91.37 | 197 | 198 |
| fig 6666666.28482.peg.1555 | R005774 | (gi:15610124) leuD (Rv2987c) - isopropylmalate isomerase small subunit [Mycobacterium tuberculosis str. H37Rv]                                                    | 91.37 | 197 | 198 |
| fig 6666666.28482.peg.1555 | R005775 | (gi:148662837) leuD (MRA 3016) - isopropylmalate isomerase small subunit [Mycobacterium tuberculosis str. H37Ra]                                                  | 91.37 | 197 | 198 |
| fig 6666666.28482.peg.1555 | R013455 | (gi:148824177) leuD (TBFG 13002) - 3-isopropylmalate dehydratase small subunit leuD [Mycobacterium tuberculosis str. F11]                                         | 91.37 | 197 | 198 |
| fig 6666666.28482.peg.1555 | R005776 | (gi:15842543) leuD (MT3065) - isopropylmalate isomerase small subunit [Mycobacterium tuberculosis str. CDC1551]                                                   | 91.37 | 197 | 198 |
| fig 6666666.28482.peg.1555 | R018998 | (gi:340627976) leuD (MCAN 30091) - putative 3-isopropylmalate dehydratase [Mycobacterium canettii str. CIPT 140010059]                                            | 91.37 | 197 | 198 |
| fig 6666666.28482.peg.1555 | R019000 | (gi:224991360) leuD (JTY 3003) - isopropylmalate isomerase small subunit [Mycobacterium bovis str. BCG str. Tokyo 172]                                            | 91.37 | 197 | 198 |
| fig 6666666.28482.peg.1555 | R005778 | (gi:121638868) leuD (BCG 3008c) - putative 3-isopropylmalate dehydratase smallsubunit leuD [Mycobacterium bovis str. BCG Pasteur 1173P2]                          | 91.37 | 197 | 198 |
| fig 6666666.28482.peg.1555 | R005777 | (gi:31794163) leuD (Mb3011c) - isopropylmalate isomerase small subunit [Mycobacterium bovis str. AF2122/97]                                                       | 91.37 | 197 | 198 |
| fig 6666666.28482.peg.1555 | R018997 | (gi:339632993) leuD (MAF 29920) - putative 3-isopropylmalate dehydratase (small subunit) LEUD (isopropylmalate isomerase) [Mycobacterium africanum str. GM041182] | 91.37 | 197 | 198 |
| fig 6666666.28482.peg.1555 | R005783 | (gi:118470522) leuD (MSMEG 2388) - 3-isopropylmalate dehydratase, small subunit [Mycobacterium smegmatis str. MC2 155]                                            | 88.32 | 197 | 198 |
| fig 6666666.28482.peg.1555 | R005781 | (gi:15827895) leuD (ML1684) - isopropylmalate isomerase small subunit [Mycobacterium leprae str. TN]                                                              | 87.88 | 198 | 198 |
| fig 6666666.28482.peg.1555 | R019001 | (gi:221230372) leuD (MLBr 01684) - isopropylmalate isomerase small subunit [Mycobacterium leprae str. Br4923]                                                     | 87.88 | 198 | 198 |
| fig 6666666.28482.peg.1555 | R019002 | (gi:333991330) leuD (JDM601 2690) - 3-isopropylmalate dehydratase (small subunit) LeuD [Mycobacterium sp. str. JDM601]                                            | 86.36 | 198 | 198 |
| fig 6666666.28482.peg.1555 | R005785 | (gi:120403128) leuD (Mvan 2136) - 3-isopropylmalate dehydratase, small subunit [Mycobacterium vanbaalenii str. PYR-1]                                             | 87.31 | 197 | 198 |

|                            |         |                                                                                                                     |       |     |     |
|----------------------------|---------|---------------------------------------------------------------------------------------------------------------------|-------|-----|-----|
| fig 6666666.28482.peg.1555 | R005788 | (gi:108798890) leuD (Mmcs 1922) - 3-isopropylmalate dehydratase, small subunit [Mycobacterium sp. str. MCS]         | 86.8  | 197 | 198 |
| fig 6666666.28482.peg.1555 | R005787 | (gi:119868005) leuD (Mkms 1968) - 3-isopropylmalate dehydratase, small subunit [Mycobacterium sp. str. KMS]         | 86.8  | 197 | 198 |
| fig 6666666.28482.peg.1555 | R005786 | (gi:126434490) leuD (Mjls 1902) - 3-isopropylmalate dehydratase, small subunit [Mycobacterium sp. str. JLS]         | 86.29 | 197 | 198 |
| fig 6666666.28482.peg.1555 | R005784 | (gi:145224805) leuD (Mflv 4226) - 3-isopropylmalate dehydratase, small subunit [Mycobacterium gilvum str. PYR-GCK]  | 85.79 | 197 | 198 |
| fig 6666666.28482.peg.1555 | R018996 | (gi:169630374) leuD (MAB 3293c) - isopropylmalate isomerase small subunit [Mycobacterium abscessus str. ATCC 19977] | 81.82 | 198 | 198 |
| fig 6666666.28482.peg.1617 | R019862 | (gi:183982677) PE18 (MMAR 2670) - PE family protein, PE19 1 [Mycobacterium marinum str. M]                          | 63.22 | 87  | 99  |
| fig 6666666.28482.peg.1617 | R018659 | (gi:118618471) PE18 (MUL 3088) - PE family protein [Mycobacterium ulcerans str. Agy99]                              | 62.07 | 87  | 99  |
| fig 6666666.28482.peg.1617 | R019877 | (gi:183982680) PE19 (MMAR 2673) - PE family protein, PE19 [Mycobacterium marinum str. M]                            | 68.97 | 87  | 99  |
| fig 6666666.28482.peg.1617 | R018680 | (gi:41407605) PE19 (MAP1507) - hypothetical protein [Mycobacterium avium str. K-10 (subsp. paratuberculosis)]       | 65.52 | 87  | 99  |
| fig 6666666.28482.peg.1617 | R019880 | (gi:253799168) PE19 (TBMG 02205) - PE family protein [Mycobacterium tuberculosis str. KZN 1435]                     | 68.97 | 87  | 99  |
| fig 6666666.28482.peg.1617 | R018674 | (gi:148823006) PE19 (TBFG 11821) - PE family protein [Mycobacterium tuberculosis str. F11]                          | 68.97 | 87  | 99  |
| fig 6666666.28482.peg.1617 | R018677 | (gi:15841261) PE19 (MT1840) - PE family protein [Mycobacterium tuberculosis str. CDC1551]                           | 68.97 | 87  | 99  |
| fig 6666666.28482.peg.1617 | R019865 | (gi:253799172) PE18 (TBMG 02209) - PE family protein [Mycobacterium tuberculosis str. KZN 1435]                     | 67.82 | 87  | 99  |
| fig 6666666.28482.peg.1617 | R018675 | (gi:57116913) PE19 (Rv1791) - PE family protein [Mycobacterium tuberculosis str. H37Rv]                             | 68.97 | 87  | 99  |
| fig 6666666.28482.peg.1617 | R018654 | (gi:57116910) PE18 (Rv1788) - PE family protein [Mycobacterium tuberculosis str. H37Rv]                             | 67.82 | 87  | 99  |
| fig 6666666.28482.peg.1617 | R018676 | (gi:148661598) PE19 (MRA 1805) - PE family protein [Mycobacterium tuberculosis str. H37Ra]                          | 68.97 | 87  | 99  |

|                            |         |                                                                                                                         |       |     |     |
|----------------------------|---------|-------------------------------------------------------------------------------------------------------------------------|-------|-----|-----|
| fig 6666666.28482.peg.1617 | R018655 | (gi:148661595) PE18 (MRA 1802) - PE family protein [Mycobacterium tuberculosis str. H37Ra]                              | 67.82 | 87  | 99  |
| fig 6666666.28482.peg.1617 | R018653 | (gi:148823003) PE18 (TBFG 11818) - PE family protein [Mycobacterium tuberculosis str. F11]                              | 67.82 | 87  | 99  |
| fig 6666666.28482.peg.1617 | R018656 | (gi:15841256) PE18 (MT1837) - PE family protein [Mycobacterium tuberculosis str. CDC1551]                               | 67.82 | 87  | 99  |
| fig 6666666.28482.peg.1617 | R019879 | (gi:340626803) PE19 (MCAN 18091) - PE family protein [Mycobacterium canettii str. CIPT 140010059]                       | 68.97 | 87  | 99  |
| fig 6666666.28482.peg.1617 | R019864 | (gi:340626800) PE18 (MCAN 18061) - PE family protein [Mycobacterium canettii str. CIPT 140010059]                       | 67.82 | 87  | 99  |
| fig 6666666.28482.peg.1617 | R019881 | (gi:224990176) PE19 (JTY 1807) - PE family protein [Mycobacterium bovis str. BCG str. Tokyo 172]                        | 68.97 | 87  | 99  |
| fig 6666666.28482.peg.1617 | R019866 | (gi:224990173) PE18 (JTY 1804) - PE family protein [Mycobacterium bovis str. BCG str. Tokyo 172]                        | 67.82 | 87  | 99  |
| fig 6666666.28482.peg.1617 | R018679 | (gi:121637692) PE19 (BCG 1823) - PE family protein [Mycobacterium bovis str. BCG Pasteur 1173P2]                        | 68.97 | 87  | 99  |
| fig 6666666.28482.peg.1617 | R018658 | (gi:121637689) PE18 (BCG 1820) - PE family protein [Mycobacterium bovis str. BCG Pasteur 1173P2]                        | 67.82 | 87  | 99  |
| fig 6666666.28482.peg.1617 | R018678 | (gi:31792979) PE19 (Mb1819) - PE family protein [Mycobacterium bovis str. AF2122/97]                                    | 68.97 | 87  | 99  |
| fig 6666666.28482.peg.1617 | R018657 | (gi:31792976) PE18 (Mb1816) - PE family protein [Mycobacterium bovis str. AF2122/97]                                    | 67.82 | 87  | 99  |
| fig 6666666.28482.peg.1617 | R019878 | (gi:339631845) PE19 (MAF 18130) - PE family protein [Mycobacterium africanum str. GM041182]                             | 68.97 | 87  | 99  |
| fig 6666666.28482.peg.1617 | R019863 | (gi:339631842) PE18 (MAF 18100) - PE family protein [Mycobacterium africanum str. GM041182]                             | 67.82 | 87  | 99  |
| fig 6666666.28482.peg.1617 | R019867 | (gi:333990534) PE18 (JDM601 1894) - PE-PGRS family protein [Mycobacterium sp. str. JDM601]                              | 67.82 | 87  | 99  |
| fig 6666666.28482.peg.1641 | R006179 | (gi:41410435) sigM (MAP4337) - RNA polymerase sigma-70 factor [Mycobacterium avium str. K-10 (subsp. paratuberculosis)] | 86.74 | 181 | 203 |
| fig 6666666.28482.peg.1641 | R006180 | (gi:118463700) sigM (MAV 5299) - RNA polymerase sigma-70 factor [Mycobacterium avium str. 104]                          | 86.74 | 181 | 203 |

|                            |         |                                                                                                                                          |       |     |     |
|----------------------------|---------|------------------------------------------------------------------------------------------------------------------------------------------|-------|-----|-----|
| fig 6666666.28482.peg.1641 | R019241 | (gi:253800961) sigM (TBMG 03959) - RNA polymerase sigma factor SigM<br>[Mycobacterium tuberculosis str. KZN 1435]                        | 85.79 | 183 | 203 |
| fig 6666666.28482.peg.1641 | R006175 | (gi:148663778) sigM (MRA 3950) - RNA polymerase sigma-70 factor<br>[Mycobacterium tuberculosis str. H37Ra]                               | 85.79 | 183 | 203 |
| fig 6666666.28482.peg.1641 | R013501 | (gi:148825119) sigM (TBF3 13946) - alternative RNA polymerase sigma factor sigM<br>[Mycobacterium tuberculosis str. F11]                 | 85.79 | 183 | 203 |
| fig 6666666.28482.peg.1641 | R019242 | (gi:224992317) sigM (JTY 3970) - RNA polymerase sigma factor SigM<br>[Mycobacterium bovis str. BCG str. Tokyo 172]                       | 85.79 | 183 | 203 |
| fig 6666666.28482.peg.1641 | R006178 | (gi:121639822) sigM (BCG 3968) - putative alternative RNA polymerase sigma factor<br>sigMa [Mycobacterium bovis str. BCG Pasteur 1173P2] | 85.79 | 183 | 203 |
| fig 6666666.28482.peg.1641 | R006177 | (gi:31795084) sigM (Mb3941) - RNA polymerase sigma-70 factor [Mycobacterium<br>bovis str. AF2122/97]                                     | 85.25 | 183 | 203 |
| fig 6666666.28482.peg.1641 | R006176 | (gi:15843544) sigM (MT4030) - RNA polymerase sigma-70 factor [Mycobacterium<br>tuberculosis str. CDC1551]                                | 85.25 | 183 | 203 |
| fig 6666666.28482.peg.1641 | R019240 | (gi:340628881) sigM (MCAN 39311) - putative alternative RNA polymerase sigma<br>factor SIGM [Mycobacterium canettii str. CIPT 140010059] | 85.25 | 183 | 203 |
| fig 6666666.28482.peg.1641 | R019237 | (gi:183985445) sigM (MMAR 5475) - RNA polymerase sigma factor SigM<br>[Mycobacterium marinum str. M]                                     | 72.25 | 186 | 203 |
| fig 6666666.28482.peg.1641 | R006181 | (gi:118620066) sigM (MUL 5064) - alternative RNA polymerase sigma factor SigM<br>[Mycobacterium ulcerans str. Agy99]                     | 70.16 | 186 | 203 |
| fig 6666666.28482.peg.1641 | R006174 | (gi:15611047) sigM (Rv3911) - RNA polymerase sigma-70 factor [Mycobacterium<br>tuberculosis str. H37Rv]                                  | 74.35 | 191 | 203 |
| fig 6666666.28482.peg.1641 | R006185 | (gi:126438340) sigM (Mjls 5777) - transcriptional regulator, Fis family<br>[Mycobacterium sp. str. JLS]                                  | 71.43 | 181 | 203 |
| fig 6666666.28482.peg.1641 | R006187 | (gi:108802360) sigM (Mmcs 5401) - RNA polymerase, sigma-24 subunit, ECF<br>subfamily [Mycobacterium sp. str. MCS]                        | 70.33 | 181 | 203 |
| fig 6666666.28482.peg.1641 | R006186 | (gi:119871513) sigM (Mkms 5490) - transcriptional regulator, Fis family<br>[Mycobacterium sp. str. KMS]                                  | 70.33 | 181 | 203 |
| fig 6666666.28482.peg.1641 | R019243 | (gi:333992975) sigM (JDM601 4335) - RNA polymerase sigma factor SigM<br>[Mycobacterium sp. str. JDM601]                                  | 74.71 | 174 | 203 |
| fig 6666666.28482.peg.1641 | R006182 | (gi:118469491) sigM (MSMEG 6931) - RNA polymerase sigma-70 factor<br>[Mycobacterium smegmatis str. MC2 155]                              | 65.36 | 171 | 203 |

|                            |         |                                                                                                                                                     |       |     |     |
|----------------------------|---------|-----------------------------------------------------------------------------------------------------------------------------------------------------|-------|-----|-----|
| fig 6666666.28482.peg.1641 | R019238 | (gi:169632011) sigM (MAB 4938) - alternative RNA polymerase sigma factor SigM [Mycobacterium abscessus str. ATCC 19977]                             | 65.28 | 192 | 203 |
| fig 6666666.28482.peg.1641 | R006183 | (gi:145221435) sigM (Mflv 0841) - transcriptional regulator, Fis family [Mycobacterium gilvum str. PYR-GCK]                                         | 67.58 | 177 | 203 |
| fig 6666666.28482.peg.1659 | R018301 | (gi:31795034) Mb3890 - hypothetical protein [Mycobacterium bovis str. AF2122/97]                                                                    | 79.84 | 243 | 248 |
| fig 6666666.28482.peg.1684 | R006389 | (gi:41409706) mce1E (MAP3608) - LprK [Mycobacterium avium str. K-10 (subsp. paratuberculosis)]                                                      | 88.36 | 335 | 335 |
| fig 6666666.28482.peg.1684 | R006391 | (gi:15828397) mce1E (ML2593) - putative lipoprotein [Mycobacterium leprae str. TN]                                                                  | 84.18 | 335 | 335 |
| fig 6666666.28482.peg.1684 | R019353 | (gi:221230874) mce1E (MLBr 02593) - putative lipoprotein [Mycobacterium leprae str. Br4923]                                                         | 84.18 | 335 | 335 |
| fig 6666666.28482.peg.1684 | R019348 | (gi:183980447) mce1E (MMAR 0416) - MCE family lipoprotein LprK [Mycobacterium marinum str. M]                                                       | 81.49 | 335 | 335 |
| fig 6666666.28482.peg.1684 | R006392 | (gi:118616799) mce1E (MUL 1066) - MCE-family lipoprotein LprK (MCE-family lipoprotein Mce1E) [Mycobacterium ulcerans str. Agy99]                    | 80.9  | 335 | 335 |
| fig 6666666.28482.peg.1684 | R019350 | (gi:340625210) mce1E (MCAN 01791) - putative MCE-family lipoprotein LPRK [Mycobacterium canettii str. CIPT 140010059]                               | 77.61 | 335 | 335 |
| fig 6666666.28482.peg.1684 | R006384 | (gi:15607314) mce1E (Rv0173) - POSSIBLE MCE-FAMILY LIPOPROTEIN LPRK (MCE-FAMILY LIPOPROTEIN MCE1E) [Mycobacterium tuberculosis str. H37Rv]          | 77.31 | 335 | 335 |
| fig 6666666.28482.peg.1684 | R006385 | (gi:148659937) mce1E (MRA 0181) - MCE-family lipoprotein LprK [Mycobacterium tuberculosis str. H37Ra]                                               | 77.31 | 335 | 335 |
| fig 6666666.28482.peg.1684 | R013516 | (gi:148821365) mce1E (TBFG 10174) - MCE-family lipoprotein lprK (MCE-family lipoprotein mce1e) [Mycobacterium tuberculosis str. F11]                | 77.31 | 335 | 335 |
| fig 6666666.28482.peg.1684 | R019352 | (gi:224988558) mce1E (JTY 0179) - putative MCE-family lipoprotein mce1E [Mycobacterium bovis str. BCG str. Tokyo 172]                               | 77.31 | 335 | 335 |
| fig 6666666.28482.peg.1684 | R006388 | (gi:121636085) mce1E (BCG 0210) - putative mce-family lipoprotein lprK (MCE-family lipoprotein mce1E) [Mycobacterium bovis str. BCG Pasteur 1173P2] | 77.31 | 335 | 335 |
| fig 6666666.28482.peg.1684 | R006387 | (gi:31791351) mce1E (Mb0179) - POSSIBLE MCE-FAMILY LIPOPROTEIN LPRK (MCE-FAMILY LIPOPROTEIN MCE1E) [Mycobacterium bovis str. AF2122/97]             | 77.31 | 335 | 335 |

|                            |         |                                                                                                                                                |       |     |     |
|----------------------------|---------|------------------------------------------------------------------------------------------------------------------------------------------------|-------|-----|-----|
| fig 6666666.28482.peg.1684 | R019349 | (gi:339630254) mce1E (MAF 01740) - putative MCE-family lipoprotein LprK (MCE-family lipoprotein Mce1E) [Mycobacterium africanum str. GM041182] | 77.31 | 335 | 335 |
| fig 6666666.28482.peg.1684 | R019351 | (gi:253797095) mce1E (TBMG 00174) - MCE-family lipoprotein mce1E [Mycobacterium tuberculosis str. KZN 1435]                                    | 77.31 | 335 | 335 |
| fig 6666666.28482.peg.1684 | R006386 | (gi:15839551) mce1E (MT0182) - virulence factor mce family protein [Mycobacterium tuberculosis str. CDC1551]                                   | 77.31 | 335 | 335 |
| fig 6666666.28482.peg.1684 | R006462 | (gi:126432725) mce2E (Mjls 0112) - virulence factor Mce family protein [Mycobacterium sp. str. JLS]                                            | 67.47 | 332 | 335 |
| fig 6666666.28482.peg.1684 | R006464 | (gi:108797102) mce2E (Mmcs 0122) - Mammalian cell entry [Mycobacterium sp. str. MCS]                                                           | 66.87 | 332 | 335 |
| fig 6666666.28482.peg.1684 | R006463 | (gi:119866187) mce2E (Mkms 0131) - virulence factor Mce family protein [Mycobacterium sp. str. KMS]                                            | 66.87 | 332 | 335 |
| fig 6666666.28482.peg.1684 | R019380 | (gi:340625623) mce2E (MCAN 05991) - putative MCE-family lipoprotein LPRL [Mycobacterium canettii str. CIPT 140010059]                          | 66.27 | 332 | 335 |
| fig 6666666.28482.peg.1684 | R019381 | (gi:253797528) mce2E (TBMG 00601) - MCE-family lipoprotein mce2E [Mycobacterium tuberculosis str. KZN 1435]                                    | 65.66 | 332 | 335 |
| fig 6666666.28482.peg.1684 | R006453 | (gi:15607733) mce2E (Rv0593) - POSSIBLE MCE-FAMILY LIPOPROTEIN LPRL (MCE-FAMILY LIPOPROTEIN MCE2E) [Mycobacterium tuberculosis str. H37Rv]     | 65.66 | 332 | 335 |
| fig 6666666.28482.peg.1684 | R006454 | (gi:148660363) mce2E (MRA 0601) - MCE-family lipoprotein LprL [Mycobacterium tuberculosis str. H37Ra]                                          | 65.66 | 332 | 335 |
| fig 6666666.28482.peg.1684 | R013522 | (gi:148821796) mce2E (TBFG 10605) - MCE-family lipoprotein lprL (MCE-family lipoprotein mce2e) [Mycobacterium tuberculosis str. F11]           | 65.66 | 332 | 335 |
| fig 6666666.28482.peg.1684 | R006455 | (gi:15839996) mce2E (MT0623) - virulence factor mce family protein [Mycobacterium tuberculosis str. CDC1551]                                   | 65.66 | 332 | 335 |
| fig 6666666.28482.peg.1684 | R019382 | (gi:224988983) mce2E (JTY 0608) - putative MCE-family lipoprotein [Mycobacterium bovis str. BCG str. Tokyo 172]                                | 65.66 | 332 | 335 |
| fig 6666666.28482.peg.1684 | R006457 | (gi:121636511) mce2E (BCG 0639) - putative mce-family lipoprotein lprL [Mycobacterium bovis str. BCG Pasteur 1173P2]                           | 65.66 | 332 | 335 |
| fig 6666666.28482.peg.1684 | R019379 | (gi:339630661) mce2E (MAF 06000) - putative MCE-family lipoprotein LPRL (MCE-family lipoprotein MCE2E) [Mycobacterium africanum str. GM041182] | 65.66 | 332 | 335 |

|                            |         |                                                                                                                |       |     |     |
|----------------------------|---------|----------------------------------------------------------------------------------------------------------------|-------|-----|-----|
| fig 6666666.28482.peg.1684 | R006393 | (gi:118472695) mce1E (MSMEG 0138) - virulence factor Mce family protein [Mycobacterium smegmatis str. MC2 155] | 65.36 | 332 | 335 |
| fig 6666666.28482.peg.1684 | R006458 | (gi:41410186) mce2E (MAP4088) - LprL [Mycobacterium avium str. K-10 (subsp. paratuberculosis)]                 | 64.16 | 332 | 335 |
| fig 6666666.28482.peg.1684 | R006461 | (gi:120401166) mce2E (Mvan 0138) - virulence factor Mce family protein [Mycobacterium vanbaalenii str. PYR-1]  | 63.25 | 332 | 335 |
| fig 6666666.28482.peg.1684 | R006460 | (gi:145221302) mce2E (Mflv 0707) - virulence factor Mce family protein [Mycobacterium gilvum str. PYR-GCK]     | 63.25 | 332 | 335 |
| fig 6666666.28482.peg.1684 | R006459 | (gi:118462367) mce2E (MAV 4547) - virulence factor Mce family protein [Mycobacterium avium str. 104]           | 64.46 | 332 | 335 |
| fig 6666666.28482.peg.1684 | R019354 | (gi:333988766) mce1E (JDM601 0126) - MCE family lipoprotein LprK [Mycobacterium sp. str. JDM601]               | 60.3  | 335 | 335 |
| fig 6666666.28482.peg.1685 | R006399 | (gi:41409707) mce1F (MAP3609) - hypothetical protein [Mycobacterium avium str. K-10 (subsp. paratuberculosis)] | 89.15 | 516 | 516 |
| fig 6666666.28482.peg.1685 | R006401 | (gi:15828398) mce1F (ML2594) - putative secreted protein [Mycobacterium leprae str. TN]                        | 81.01 | 516 | 516 |
| fig 6666666.28482.peg.1685 | R019360 | (gi:221230875) mce1F (MLBr 02594) - putative secreted protein [Mycobacterium leprae str. Br4923]               | 81.01 | 516 | 516 |
| fig 6666666.28482.peg.1685 | R006402 | (gi:118616800) mce1F (MUL 1067) - MCE-family protein Mce1F [Mycobacterium ulcerans str. Agy99]                 | 83.01 | 516 | 516 |
| fig 6666666.28482.peg.1685 | R019355 | (gi:183980448) mce1F (MMAR 0417) - MCE-family protein Mce1F [Mycobacterium marinum str. M]                     | 83.01 | 516 | 516 |
| fig 6666666.28482.peg.1685 | R019358 | (gi:253797096) mce1F (TBMG 00175) - MCE-family protein mce1F [Mycobacterium tuberculosis str. KZN 1435]        | 78.25 | 515 | 516 |
| fig 6666666.28482.peg.1685 | R013517 | (gi:148821366) mce1F (TBFG 10175) - MCE-family protein mce1F [Mycobacterium tuberculosis str. F11]             | 78.25 | 515 | 516 |
| fig 6666666.28482.peg.1685 | R006396 | (gi:15839552) mce1F (MT0183) - virulence factor mce family protein [Mycobacterium tuberculosis str. CDC1551]   | 78.25 | 515 | 516 |
| fig 6666666.28482.peg.1685 | R019359 | (gi:224988559) mce1F (JTY 0180) - MCE-family protein [Mycobacterium bovis str. BCG str. Tokyo 172]             | 78.25 | 515 | 516 |
| fig 6666666.28482.peg.1685 | R006398 | (gi:121636086) mce1F (BCG 0211) - MCE-family protein mce1F [Mycobacterium bovis str. BCG Pasteur 1173P2]       | 78.25 | 515 | 516 |

|                            |         |                                                                                                           |       |     |     |
|----------------------------|---------|-----------------------------------------------------------------------------------------------------------|-------|-----|-----|
| fig 6666666.28482.peg.1685 | R006397 | (gi:31791352) mce1F (Mb0180) - MCE-FAMILY PROTEIN MCE1F [Mycobacterium bovis str. AF2122/97]              | 78.25 | 515 | 516 |
| fig 6666666.28482.peg.1685 | R019356 | (gi:339630255) mce1F (MAF 01750) - MCE-family protein MCE1F [Mycobacterium africanum str. GM041182]       | 78.25 | 515 | 516 |
| fig 6666666.28482.peg.1685 | R019357 | (gi:340625211) mce1F (MCAN 01801) - MCE-family protein MCE1F [Mycobacterium canettii str. CIPT 140010059] | 77.86 | 515 | 516 |
| fig 6666666.28482.peg.1685 | R006394 | (gi:15607315) mce1F (Rv0174) - MCE-FAMILY PROTEIN MCE1F [Mycobacterium tuberculosis str. H37Rv]           | 78.06 | 515 | 516 |
| fig 6666666.28482.peg.1685 | R006395 | (gi:148659938) mce1F (MRA 0182) - MCE-family protein Mce1F [Mycobacterium tuberculosis str. H37Ra]        | 78.06 | 515 | 516 |
| fig 6666666.28482.peg.1685 | R006474 | (gi:126432726) mce2F (Mjls 0113) - virulence factor Mce family protein [Mycobacterium sp. str. JLS]       | 70.13 | 515 | 516 |
| fig 6666666.28482.peg.1685 | R006476 | (gi:108797103) mce2F (Mmcs 0123) - Mammalian cell entry [Mycobacterium sp. str. MCS]                      | 69.75 | 515 | 516 |
| fig 6666666.28482.peg.1685 | R006475 | (gi:119866188) mce2F (Mkms 0132) - virulence factor Mce family protein [Mycobacterium sp. str. KMS]       | 69.75 | 515 | 516 |
| fig 6666666.28482.peg.1685 | R019385 | (gi:253797529) mce2F (TBMG 00602) - MCE-family protein mce2F [Mycobacterium tuberculosis str. KZN 1435]   | 67.89 | 516 | 516 |
| fig 6666666.28482.peg.1685 | R006465 | (gi:15607734) mce2F (Rv0594) - MCE-FAMILY PROTEIN MCE2F [Mycobacterium tuberculosis str. H37Rv]           | 67.89 | 516 | 516 |
| fig 6666666.28482.peg.1685 | R006466 | (gi:148660364) mce2F (MRA 0602) - MCE-family protein Mce2F [Mycobacterium tuberculosis str. H37Ra]        | 67.89 | 516 | 516 |
| fig 6666666.28482.peg.1685 | R013523 | (gi:148821797) mce2F (TBFG 10606) - MCE-family protein mce2F [Mycobacterium tuberculosis str. F11]        | 67.89 | 516 | 516 |
| fig 6666666.28482.peg.1685 | R019386 | (gi:224988984) mce2F (JTY 0609) - MCE-family protein [Mycobacterium bovis str. BCG str. Tokyo 172]        | 67.89 | 516 | 516 |
| fig 6666666.28482.peg.1685 | R006469 | (gi:121636512) mce2F (BCG 0640) - mce-family protein mce2F [Mycobacterium bovis str. BCG Pasteur 1173P2]  | 67.89 | 516 | 516 |
| fig 6666666.28482.peg.1685 | R006468 | (gi:31791776) mce2F (Mb0610) - MCE-FAMILY PROTEIN MCE2F [Mycobacterium bovis str. AF2122/97]              | 67.89 | 516 | 516 |
| fig 6666666.28482.peg.1685 | R019383 | (gi:339630662) mce2F (MAF 06010) - MCE-family protein MCE2F [Mycobacterium africanum str. GM041182]       | 67.89 | 516 | 516 |



|                            |         |                                                                                                                                                   |       |     |     |
|----------------------------|---------|---------------------------------------------------------------------------------------------------------------------------------------------------|-------|-----|-----|
| fig 6666666.28482.peg.1685 | R006467 | (gi:15839997) mce2F (MT0624) - virulence factor mce family protein [Mycobacterium tuberculosis str. CDC1551]                                      | 67.89 | 516 | 516 |
| fig 6666666.28482.peg.1685 | R006472 | (gi:145221301) mce2F (Mflv 0706) - virulence factor Mce family protein [Mycobacterium gilvum str. PYR-GCK]                                        | 67.5  | 516 | 516 |
| fig 6666666.28482.peg.1685 | R019384 | (gi:340625624) mce2F (MCAN 06001) - MCE-family protein MCE2F [Mycobacterium canettii str. CIPT 140010059]                                         | 67.7  | 516 | 516 |
| fig 6666666.28482.peg.1685 | R006470 | (gi:41410187) mce2F (MAP4089) - hypothetical protein [Mycobacterium avium str. K-10 (subsp. paratuberculosis)]                                    | 67.83 | 515 | 516 |
| fig 6666666.28482.peg.1685 | R006471 | (gi:118463921) mce2F (MAV 4546) - mce-family protein mce2f [Mycobacterium avium str. 104]                                                         | 69.72 | 491 | 516 |
| fig 6666666.28482.peg.1685 | R006473 | (gi:120401167) mce2F (Mvan 0139) - virulence factor Mce family protein [Mycobacterium vanbaalenii str. PYR-1]                                     | 66.35 | 516 | 516 |
| fig 6666666.28482.peg.1685 | R006403 | (gi:118473635) mce1F (MSMEG 0139) - mce-family protein mce1f [Mycobacterium smegmatis str. MC2 155]                                               | 65.96 | 515 | 516 |
| fig 6666666.28482.peg.1685 | R019361 | (gi:333988767) mce1F (JDM601 0127) - MCE-family protein Mce1F [Mycobacterium sp. str. JDM601]                                                     | 64.65 | 514 | 516 |
| fig 6666666.28482.peg.1685 | R006400 | (gi:118462429) mce1F (MAV 5010) - mce-family protein mce1f [Mycobacterium avium str. 104]                                                         | 89.46 | 313 | 516 |
| fig 6666666.28482.peg.1928 | R005734 | (gi:41406712) purC (MAP0614) - phosphoribosylaminoimidazole-succinocarboxamide synthase [Mycobacterium avium str. K-10 (subsp. paratuberculosis)] | 91.81 | 293 | 297 |
| fig 6666666.28482.peg.1928 | R005735 | (gi:118466397) purC (MAV 0725) - phosphoribosylaminoimidazole-succinocarboxamide synthase [Mycobacterium avium str. 104]                          | 91.47 | 293 | 297 |
| fig 6666666.28482.peg.1928 | R018972 | (gi:183984877) purC (MMAR 4909) - phosphoribosylaminoimidazole-succinocarboxamide synthase [Mycobacterium marinum str. M]                         | 90.57 | 297 | 297 |
| fig 6666666.28482.peg.1928 | R005737 | (gi:118616338) purC (MUL 0497) - phosphoribosylaminoimidazole-succinocarboxamide synthase, PurC [Mycobacterium ulcerans str. Agy99]               | 89.56 | 297 | 297 |
| fig 6666666.28482.peg.1928 | R018976 | (gi:253797726) purC (TBMG 00795) - phosphoribosylaminoimidazole-succinocarboxamide synthase [Mycobacterium tuberculosis str. KZN 1435]            | 88.55 | 297 | 297 |
| fig 6666666.28482.peg.1928 | R005729 | (gi:15607920) purC (Rv0780) - phosphoribosylaminoimidazole-succinocarboxamide synthase [Mycobacterium tuberculosis str. H37Rv]                    | 88.55 | 297 | 297 |
| fig 6666666.28482.peg.1928 | R005730 | (gi:148660557) purC (MRA 0789) - phosphoribosylaminoimidazole-succinocarboxamide synthase [Mycobacterium tuberculosis str. H37Ra]                 | 88.55 | 297 | 297 |

|                            |         |                                                                                                                                                             |       |     |     |
|----------------------------|---------|-------------------------------------------------------------------------------------------------------------------------------------------------------------|-------|-----|-----|
| fig 6666666.28482.peg.1928 | R013452 | (gi:148821985) purC (TBF8 10795) - phosphoribosylaminoimidazole-succinocarboxamide synthase purC [Mycobacterium tuberculosis str. F11]                      | 88.55 | 297 | 297 |
| fig 6666666.28482.peg.1928 | R005731 | (gi:15840195) purC (MT0804) - phosphoribosylaminoimidazole-succinocarboxamide synthase [Mycobacterium tuberculosis str. CDC1551]                            | 88.55 | 297 | 297 |
| fig 6666666.28482.peg.1928 | R018977 | (gi:224989176) purC (JTY 0802) - phosphoribosylaminoimidazole-succinocarboxamide synthase [Mycobacterium bovis str. BCG str. Tokyo 172]                     | 88.55 | 297 | 297 |
| fig 6666666.28482.peg.1928 | R005733 | (gi:121636704) purC (BCG 0832) - Phosphoribosylaminoimidazole-succinocarboxamide synthase purC [Mycobacterium bovis str. BCG Pasteur 1173P2]                | 88.55 | 297 | 297 |
| fig 6666666.28482.peg.1928 | R005732 | (gi:31791968) purC (Mb0803) - phosphoribosylaminoimidazole-succinocarboxamide synthase [Mycobacterium bovis str. AF2122/97]                                 | 88.55 | 297 | 297 |
| fig 6666666.28482.peg.1928 | R018974 | (gi:339630850) purC (MAF 07920) - phosphoribosylaminoimidazole-succinocarboxamide synthase PURC (SAICAR synthetase) [Mycobacterium africanum str. GM041182] | 88.55 | 297 | 297 |
| fig 6666666.28482.peg.1928 | R018975 | (gi:340625799) purC (MCAN 07841) - phosphoribosylaminoimidazole-succinocarboxamide synthase PURC [Mycobacterium canettii str. CIPT 140010059]               | 88.22 | 297 | 297 |
| fig 6666666.28482.peg.1928 | R018979 | (gi:333992221) purC (JDM601 3581) - phosphoribosylaminoimidazole-succinocarboxamide synthase PurC [Mycobacterium sp. str. JDM601]                           | 82.77 | 296 | 297 |
| fig 6666666.28482.peg.1928 | R005736 | (gi:15828193) purC (ML2227) - phosphoribosylaminoimidazole-succinocarboxamide synthase [Mycobacterium leprae str. TN]                                       | 83.84 | 297 | 297 |
| fig 6666666.28482.peg.1928 | R018978 | (gi:221230670) purC (MLBr 02227) - phosphoribosylaminoimidazole-succinocarboxamide synthase [Mycobacterium leprae str. Br4923]                              | 83.84 | 297 | 297 |
| fig 6666666.28482.peg.1928 | R005738 | (gi:118471351) purC (MSMEG 5841) - phosphoribosylaminoimidazole-succinocarboxamide synthase [Mycobacterium smegmatis str. MC2 155]                          | 80.54 | 294 | 297 |
| fig 6666666.28482.peg.1928 | R005741 | (gi:126437508) purC (Mjls 4943) - phosphoribosylaminoimidazole-succinocarboxamide synthase [Mycobacterium sp. str. JLS]                                     | 79.59 | 294 | 297 |
| fig 6666666.28482.peg.1928 | R005743 | (gi:108801523) purC (Mmcs 4560) - phosphoribosylaminoimidazole-succinocarboxamide synthase [Mycobacterium sp. str. MCS]                                     | 79.59 | 294 | 297 |
| fig 6666666.28482.peg.1928 | R005742 | (gi:119870677) purC (Mkms 4648) - phosphoribosylaminoimidazole-succinocarboxamide synthase [Mycobacterium sp. str. KMS]                                     | 79.59 | 294 | 297 |

|                            |         |                                                                                                                                     |       |     |     |
|----------------------------|---------|-------------------------------------------------------------------------------------------------------------------------------------|-------|-----|-----|
| fig 6666666.28482.peg.1928 | R005739 | (gi:145222208) purC (Mflv 1616) - phosphoribosylaminoimidazole-succinocarboxamide synthase [Mycobacterium gilvum str. PYR-GCK]      | 78.57 | 294 | 297 |
| fig 6666666.28482.peg.1928 | R018973 | (gi:169627791) purC (MAB 0689) - phosphoribosylaminoimidazole-succinocarboxamide synthase [Mycobacterium abscessus str. ATCC 19977] | 77.1  | 297 | 297 |
| fig 6666666.28482.peg.1928 | R005740 | (gi:120406086) purC (Mvan 5138) - phosphoribosylaminoimidazole-succinocarboxamide synthase [Mycobacterium vanbaalenii str. PYR-1]   | 75.5  | 294 | 297 |
| fig 6666666.28482.peg.1948 | R014657 | (gi:157151431) rfbB-1 (SGO 1011) - dTDP-glucose 4,6-dehydratase [Streptococcus gordonii str. Challis (substr. CH1)]                 | 60.3  | 325 | 333 |
| fig 6666666.28482.peg.1963 | R018607 | (gi:15610586) eccB4 (Rv3450c) - hypothetical protein [Mycobacterium tuberculosis str. H37Rv]                                        | 63.4  | 458 | 462 |
| fig 6666666.28482.peg.1963 | R018608 | (gi:148663315) eccB4 (MRA 3491) - hypothetical protein [Mycobacterium tuberculosis str. H37Ra]                                      | 63.4  | 458 | 462 |
| fig 6666666.28482.peg.1963 | R019791 | (gi:224991867) eccB4 (JTY 3516) - hypothetical protein [Mycobacterium bovis str. BCG str. Tokyo 172]                                | 63.4  | 458 | 462 |
| fig 6666666.28482.peg.1963 | R018611 | (gi:121639371) eccB4 (BCG 3516c) - hypothetical protein [Mycobacterium bovis str. BCG Pasteur 1173P2]                               | 63.4  | 458 | 462 |
| fig 6666666.28482.peg.1963 | R018610 | (gi:31794627) eccB4 (Mb3480c) - hypothetical protein [Mycobacterium bovis str. AF2122/97]                                           | 63.4  | 458 | 462 |
| fig 6666666.28482.peg.1963 | R019788 | (gi:339633455) eccB4 (MAF 34650) - putative conserved membrane protein [Mycobacterium africanum str. GM041182]                      | 63.4  | 458 | 462 |
| fig 6666666.28482.peg.1963 | R019790 | (gi:253800495) eccB4 (TBMG 03498) - hypothetical protein [Mycobacterium tuberculosis str. KZN 1435]                                 | 63.54 | 457 | 462 |
| fig 6666666.28482.peg.1963 | R018606 | (gi:148824660) eccB4 (TBFG 13487) - hypothetical protein [Mycobacterium tuberculosis str. F11]                                      | 63.54 | 457 | 462 |
| fig 6666666.28482.peg.1963 | R018609 | (gi:15843045) eccB4 (MT3556) - hypothetical protein [Mycobacterium tuberculosis str. CDC1551]                                       | 63.54 | 457 | 462 |
| fig 6666666.28482.peg.1963 | R019789 | (gi:340628421) eccB4 (MCAN 34671) - hypothetical protein [Mycobacterium canettii str. CIPT 140010059]                               | 62.98 | 458 | 462 |
| fig 6666666.28482.peg.1963 | R019786 | (gi:183981119) eccB4 (MMAR 1099) - hypothetical protein [Mycobacterium marinum str. M]                                              | 60.81 | 457 | 462 |
| fig 6666666.28482.peg.1963 | R018614 | (gi:118616632) eccB4 (MUL 0857) - hypothetical protein [Mycobacterium ulcerans str. Agy99]                                          | 60.39 | 457 | 462 |

|                            |         |                                                                                                                                       |       |     |     |
|----------------------------|---------|---------------------------------------------------------------------------------------------------------------------------------------|-------|-----|-----|
| fig 6666666.28482.peg.1963 | R018613 | (gi:118464971) eccB4 (MAV 4392) - hypothetical protein [Mycobacterium avium str. 104]                                                 | 60.95 | 458 | 462 |
| fig 6666666.28482.peg.1963 | R018612 | (gi:41410336) eccB4 (MAP4238) - hypothetical protein [Mycobacterium avium str. K-10 (subsp. paratuberculosis)]                        | 61.22 | 457 | 462 |
| fig 6666666.28482.peg.1964 | R019783 | (gi:253800494) mycP4 (TBMG 03497) - membrane-anchored mycosin [Mycobacterium tuberculosis str. KZN 1435]                              | 63.52 | 422 | 422 |
| fig 6666666.28482.peg.1964 | R018592 | (gi:15610585) mycP4 (Rv3449) - membrane-anchored mycosin [Mycobacterium tuberculosis str. H37Rv]                                      | 63.52 | 422 | 422 |
| fig 6666666.28482.peg.1964 | R018593 | (gi:148663314) mycP4 (MRA 3490) - membrane-anchored mycosin [Mycobacterium tuberculosis str. H37Ra]                                   | 63.52 | 422 | 422 |
| fig 6666666.28482.peg.1964 | R018591 | (gi:148824659) mycP4 (TBFG 13486) - membrane-anchored mycosin [Mycobacterium tuberculosis str. F11]                                   | 63.52 | 422 | 422 |
| fig 6666666.28482.peg.1964 | R018594 | (gi:15843044) mycP4 (MT3555) - serine protease [Mycobacterium tuberculosis str. CDC1551]                                              | 63.52 | 422 | 422 |
| fig 6666666.28482.peg.1964 | R019784 | (gi:224991866) mycP4 (JTY 3515) - putative secreted serine protease [Mycobacterium bovis str. BCG str. Tokyo 172]                     | 63.52 | 422 | 422 |
| fig 6666666.28482.peg.1964 | R018596 | (gi:121639370) mycP4 (BCG 3515) - putative secreted serine protease [Mycobacterium bovis str. BCG Pasteur 1173P2]                     | 63.52 | 422 | 422 |
| fig 6666666.28482.peg.1964 | R018595 | (gi:31794626) mycP4 (Mb3479) - secreted serine protease [Mycobacterium bovis str. AF2122/97]                                          | 63.52 | 422 | 422 |
| fig 6666666.28482.peg.1964 | R019781 | (gi:339633454) mycP4 (MAF 34640) - putative membrane-anchored mycosin MYCP4 (serine protease) [Mycobacterium africanum str. GM041182] | 63.52 | 422 | 422 |
| fig 6666666.28482.peg.1964 | R019782 | (gi:340628420) mycP4 (MCAN 34661) - putative membrane-anchored mycosin MYCP4 [Mycobacterium canettii str. CIPT 140010059]             | 62.86 | 422 | 422 |
| fig 6666666.28482.peg.1964 | R018598 | (gi:118465498) mycP4 (MAV 4393) - peptidase [Mycobacterium avium str. 104]                                                            | 68.98 | 392 | 422 |
| fig 6666666.28482.peg.1964 | R018597 | (gi:41410337) mycP4 (MAP4239c) - hypothetical protein [Mycobacterium avium str. K-10 (subsp. paratuberculosis)]                       | 68.97 | 395 | 422 |
| fig 6666666.28482.peg.1964 | R018599 | (gi:118616633) mycP4 (MUL 0858) - membrane-anchored serine protease (mycosin), MycP4 [Mycobacterium ulcerans str. Agy99]              | 63.03 | 391 | 422 |
| fig 6666666.28482.peg.1964 | R019779 | (gi:183981120) mycP4 (MMAR 1100) - membrane-anchored serine protease (mycosin), MycP4 [Mycobacterium marinum str. M]                  | 63.03 | 391 | 422 |

|                            |         |                                                                                                                |       |      |      |
|----------------------------|---------|----------------------------------------------------------------------------------------------------------------|-------|------|------|
| fig 6666666.28482.peg.1966 | R019768 | (gi:340628418) eccC4 (MCAN 34641) - hypothetical protein [Mycobacterium canettii str. CIPT 140010059]          | 63.68 | 1148 | 1148 |
| fig 6666666.28482.peg.1966 | R018566 | (gi:15610583) eccC4 (Rv3447c) - hypothetical protein [Mycobacterium tuberculosis str. H37Rv]                   | 63.43 | 1148 | 1148 |
| fig 6666666.28482.peg.1966 | R018567 | (gi:148663312) eccC4 (MRA 3488) - hypothetical protein [Mycobacterium tuberculosis str. H37Ra]                 | 63.43 | 1148 | 1148 |
| fig 6666666.28482.peg.1966 | R019767 | (gi:339633452) eccC4 (MAF 34620) - putative conserved membrane protein [Mycobacterium africanum str. GM041182] | 63.43 | 1148 | 1148 |
| fig 6666666.28482.peg.1966 | R019769 | (gi:253800492) eccC4 (TBMG 03495) - hypothetical protein [Mycobacterium tuberculosis str. KZN 1435]            | 63.43 | 1148 | 1148 |
| fig 6666666.28482.peg.1966 | R018565 | (gi:148824657) eccC4 (TBF3 13484) - hypothetical protein [Mycobacterium tuberculosis str. F11]                 | 63.43 | 1148 | 1148 |
| fig 6666666.28482.peg.1966 | R019770 | (gi:224991864) eccC4 (JTY 3513) - hypothetical protein [Mycobacterium bovis str. BCG str. Tokyo 172]           | 63.43 | 1148 | 1148 |
| fig 6666666.28482.peg.1966 | R018570 | (gi:121639368) eccC4 (BCG 3513c) - hypothetical protein [Mycobacterium bovis str. BCG Pasteur 1173P2]          | 63.43 | 1148 | 1148 |
| fig 6666666.28482.peg.1966 | R018569 | (gi:31794624) eccC4 (Mb3477c) - hypothetical protein [Mycobacterium bovis str. AF2122/97]                      | 63.35 | 1148 | 1148 |
| fig 6666666.28482.peg.1966 | R018568 | (gi:15843042) eccC4 (MT3553) - FtsK/SpoIIIE family protein [Mycobacterium tuberculosis str. CDC1551]           | 63.28 | 1143 | 1148 |
| fig 6666666.28482.peg.1966 | R019765 | (gi:183981122) eccC4 (MMAR 1102) - hypothetical protein [Mycobacterium marinum str. M]                         | 60.22 | 1147 | 1148 |
| fig 6666666.28482.peg.1966 | R018572 | (gi:118463646) eccC4 (MAV 4390) - ftsk/SpoIIIE family protein [Mycobacterium avium str. 104]                   | 63.13 | 1147 | 1148 |
| fig 6666666.28482.peg.1966 | R018571 | (gi:41410339) eccC4 (MAP4241) - hypothetical protein [Mycobacterium avium str. K-10 (subsp. paratuberculosis)] | 63.3  | 1147 | 1148 |
| fig 6666666.28482.peg.1968 | R018538 | (gi:15843040) esxU (MT3550) - hypothetical protein [Mycobacterium tuberculosis str. CDC1551]                   | 79.35 | 92   | 92   |
| fig 6666666.28482.peg.1968 | R019756 | (gi:253800490) esxU (TBMG 03493) - esat-6 like protein esxU [Mycobacterium tuberculosis str. KZN 1435]         | 79.35 | 92   | 92   |
| fig 6666666.28482.peg.1968 | R018536 | (gi:15610581) esxU (Rv3445c) - ESAT-6 like protein ESXU [Mycobacterium tuberculosis str. H37Rv]                | 79.35 | 92   | 92   |

|                            |         |                                                                                                               |       |    |    |
|----------------------------|---------|---------------------------------------------------------------------------------------------------------------|-------|----|----|
| fig 6666666.28482.peg.1968 | R018537 | (gi:148663310) esxU (MRA 3486) - esat-6 like protein EsxU [Mycobacterium tuberculosis str. H37Ra]             | 79.35 | 92 | 92 |
| fig 6666666.28482.peg.1968 | R018535 | (gi:148824655) esxU (TBFG 13482) - Esat-6 like protein esxU [Mycobacterium tuberculosis str. F11]             | 79.35 | 92 | 92 |
| fig 6666666.28482.peg.1968 | R019755 | (gi:340628416) esxU (MCAN 34621) - ESAT-6 like protein ESXU [Mycobacterium canettii str. CIPT 140010059]      | 79.35 | 92 | 92 |
| fig 6666666.28482.peg.1968 | R019757 | (gi:224991862) esxU (JTY 3511) - hypothetical protein [Mycobacterium bovis str. BCG str. Tokyo 172]           | 79.35 | 92 | 92 |
| fig 6666666.28482.peg.1968 | R018540 | (gi:121639366) esxU (BCG 3511c) - hypothetical protein [Mycobacterium bovis str. BCG Pasteur 1173P2]          | 79.35 | 92 | 92 |
| fig 6666666.28482.peg.1968 | R018539 | (gi:31794622) esxU (Mb3475c) - hypothetical protein [Mycobacterium bovis str. AF2122/97]                      | 79.35 | 92 | 92 |
| fig 6666666.28482.peg.1968 | R019754 | (gi:339633450) esxU (MAF 34600) - ESAT-6 like protein ESXU [Mycobacterium africanum str. GM041182]            | 79.35 | 92 | 92 |
| fig 6666666.28482.peg.1968 | R019753 | (gi:183981124) esxU (MMAR 1104) - EsaT-6 like protein, EsxU [Mycobacterium marinum str. M]                    | 75    | 92 | 92 |
| fig 6666666.28482.peg.1968 | R018543 | (gi:118616637) esxU (MUL 0862) - EsaT-6 like protein, EsxU [Mycobacterium ulcerans str. Agy99]                | 74.73 | 91 | 92 |
| fig 6666666.28482.peg.1968 | R018542 | (gi:118465412) esxU (MAV 4388) - hypothetical protein [Mycobacterium avium str. 104]                          | 73.91 | 92 | 92 |
| fig 6666666.28482.peg.1968 | R018541 | (gi:41410341) esxU (MAP4243) - hypothetical protein [Mycobacterium avium str. K-10 (subsp. paratuberculosis)] | 70.65 | 92 | 92 |
| fig 6666666.28482.peg.1968 | R018546 | (gi:120402473) esxU (Mvan 1464) - hypothetical protein [Mycobacterium vanbaalenii str. PYR-1]                 | 65.22 | 92 | 92 |
| fig 6666666.28482.peg.1968 | R018545 | (gi:145225533) esxU (Mflv 4957) - hypothetical protein [Mycobacterium gilvum str. PYR-GCK]                    | 61.96 | 92 | 92 |
| fig 6666666.28482.peg.1968 | R019758 | (gi:333991911) esxU (JDM601 3271) - hypothetical protein [Mycobacterium sp. str. JDM601]                      | 64    | 75 | 92 |
| fig 6666666.28482.peg.1969 | R018525 | (gi:41410342) esxT (MAP4244) - hypothetical protein [Mycobacterium avium str. K-10 (subsp. paratuberculosis)] | 77.55 | 98 | 98 |
| fig 6666666.28482.peg.1969 | R018526 | (gi:118467089) esxT (MAV 4387) - hypothetical protein [Mycobacterium avium str. 104]                          | 77.55 | 98 | 98 |

|                            |         |                                                                                                                   |       |    |    |
|----------------------------|---------|-------------------------------------------------------------------------------------------------------------------|-------|----|----|
| fig 6666666.28482.peg.1969 | R019748 | (gi:340628415) esxT (MCAN 34611) - putative ESAT-6 like protein ESXT [Mycobacterium canettii str. CIPT 140010059] | 79.38 | 97 | 98 |
| fig 6666666.28482.peg.1969 | R019749 | (gi:253800489) esxT (TBMG 03492) - esat-6 like protein esxT [Mycobacterium tuberculosis str. KZN 1435]            | 79.38 | 97 | 98 |
| fig 6666666.28482.peg.1969 | R018520 | (gi:15610580) esxT (Rv3444c) - putative ESAT-6 like protein ESXT [Mycobacterium tuberculosis str. H37Rv]          | 79.38 | 97 | 98 |
| fig 6666666.28482.peg.1969 | R018521 | (gi:148663309) esxT (MRA 3485) - esat-6 like protein EsxT [Mycobacterium tuberculosis str. H37Ra]                 | 79.38 | 97 | 98 |
| fig 6666666.28482.peg.1969 | R018519 | (gi:148824654) esxT (TBFG 13481) - Esat-6 like protein esxT [Mycobacterium tuberculosis str. F11]                 | 79.38 | 97 | 98 |
| fig 6666666.28482.peg.1969 | R018522 | (gi:15843039) esxT (MT3549) - hypothetical protein [Mycobacterium tuberculosis str. CDC1551]                      | 79.38 | 97 | 98 |
| fig 6666666.28482.peg.1969 | R019750 | (gi:224991861) esxT (JTY 3510) - hypothetical protein [Mycobacterium bovis str. BCG str. Tokyo 172]               | 79.38 | 97 | 98 |
| fig 6666666.28482.peg.1969 | R018524 | (gi:121639365) esxT (BCG 3510c) - hypothetical protein [Mycobacterium bovis str. BCG Pasteur 1173P2]              | 79.38 | 97 | 98 |
| fig 6666666.28482.peg.1969 | R018523 | (gi:31794621) esxT (Mb3474c) - hypothetical protein [Mycobacterium bovis str. AF2122/97]                          | 79.38 | 97 | 98 |
| fig 6666666.28482.peg.1969 | R019747 | (gi:339633449) esxT (MAF 34590) - putative ESAT-6 like protein ESXT [Mycobacterium africanum str. GM041182]       | 79.38 | 97 | 98 |
| fig 6666666.28482.peg.1969 | R019746 | (gi:183981125) esxT (MMAR 1105) - EsaT-6 like protein, EsxT [Mycobacterium marinum str. M]                        | 73.47 | 98 | 98 |
| fig 6666666.28482.peg.1969 | R018528 | (gi:118616638) esxT (MUL 0863) - EsaT-6 like protein, EsxT [Mycobacterium ulcerans str. Agy99]                    | 71.43 | 98 | 98 |
| fig 6666666.28482.peg.1969 | R018529 | (gi:118470444) esxT (MSMEG 1539) - hypothetical protein [Mycobacterium smegmatis str. MC2 155]                    | 69.79 | 96 | 98 |
| fig 6666666.28482.peg.1969 | R018530 | (gi:145225532) esxT (Mflv 4956) - hypothetical protein [Mycobacterium gilvum str. PYR-GCK]                        | 65.62 | 96 | 98 |
| fig 6666666.28482.peg.1969 | R018531 | (gi:120402474) esxT (Mvan 1465) - hypothetical protein [Mycobacterium vanbaalenii str. PYR-1]                     | 65.62 | 96 | 98 |
| fig 6666666.28482.peg.1969 | R018534 | (gi:108798101) esxT (Mmcs 1129) - hypothetical protein [Mycobacterium sp. str. MCS]                               | 65.62 | 96 | 98 |

|                            |         |                                                                                                   |       |    |    |
|----------------------------|---------|---------------------------------------------------------------------------------------------------|-------|----|----|
| fig 6666666.28482.peg.1969 | R018533 | (gi:119867197) esxT (Mkms 1146) - hypothetical protein [Mycobacterium sp. str. KMS]               | 65.62 | 96 | 98 |
| fig 6666666.28482.peg.1969 | R018532 | (gi:126433759) esxT (Mjls 1156) - hypothetical protein [Mycobacterium sp. str. JLS]               | 65.62 | 96 | 98 |
| fig 6666666.28482.peg.1969 | R019752 | (gi:333991910) esxT (JDM601 3270) - EsaT-6 like protein EsxT [Mycobacterium sp. str. JDM601]      | 70.41 | 98 | 98 |
| fig 6666666.28482.peg.1969 | R018527 | (gi:15827096) esxT (ML0363) - hypothetical protein [Mycobacterium leprae str. TN]                 | 68.06 | 72 | 98 |
| fig 6666666.28482.peg.1969 | R019751 | (gi:221229574) esxT (MLBr 00363) - putative secreted protein [Mycobacterium leprae str. Br4923]   | 68.06 | 72 | 98 |
| fig 6666666.28482.peg.2006 | R019865 | (gi:253799172) PE18 (TBMG 02209) - PE family protein [Mycobacterium tuberculosis str. KZN 1435]   | 64.37 | 87 | 99 |
| fig 6666666.28482.peg.2006 | R018654 | (gi:57116910) PE18 (Rv1788) - PE family protein [Mycobacterium tuberculosis str. H37Rv]           | 64.37 | 87 | 99 |
| fig 6666666.28482.peg.2006 | R018655 | (gi:148661595) PE18 (MRA 1802) - PE family protein [Mycobacterium tuberculosis str. H37Ra]        | 64.37 | 87 | 99 |
| fig 6666666.28482.peg.2006 | R018653 | (gi:148823003) PE18 (TBF3 11818) - PE family protein [Mycobacterium tuberculosis str. F11]        | 64.37 | 87 | 99 |
| fig 6666666.28482.peg.2006 | R018656 | (gi:15841256) PE18 (MT1837) - PE family protein [Mycobacterium tuberculosis str. CDC1551]         | 64.37 | 87 | 99 |
| fig 6666666.28482.peg.2006 | R019864 | (gi:340626800) PE18 (MCAN 18061) - PE family protein [Mycobacterium canettii str. CIPT 140010059] | 64.37 | 87 | 99 |
| fig 6666666.28482.peg.2006 | R019866 | (gi:224990173) PE18 (JTY 1804) - PE family protein [Mycobacterium bovis str. BCG str. Tokyo 172]  | 64.37 | 87 | 99 |
| fig 6666666.28482.peg.2006 | R018658 | (gi:121637689) PE18 (BCG 1820) - PE family protein [Mycobacterium bovis str. BCG Pasteur 1173P2]  | 64.37 | 87 | 99 |
| fig 6666666.28482.peg.2006 | R018657 | (gi:31792976) PE18 (Mb1816) - PE family protein [Mycobacterium bovis str. AF2122/97]              | 64.37 | 87 | 99 |
| fig 6666666.28482.peg.2006 | R019863 | (gi:339631842) PE18 (MAF 18100) - PE family protein [Mycobacterium africanum str. GM041182]       | 64.37 | 87 | 99 |
| fig 6666666.28482.peg.2006 | R019877 | (gi:183982680) PE19 (MMAR 2673) - PE family protein, PE19 [Mycobacterium marinum str. M]          | 60.92 | 87 | 99 |



|                            |         |                                                                                                                                   |       |    |    |
|----------------------------|---------|-----------------------------------------------------------------------------------------------------------------------------------|-------|----|----|
| fig 6666666.28482.peg.2006 | R019867 | (gi:333990534) PE18 (JDM601 1894) - PE-PGRS family protein [Mycobacterium sp. str. JDM601]                                        | 64.37 | 87 | 99 |
| fig 6666666.28482.peg.2006 | R018675 | (gi:57116913) PE19 (Rv1791) - PE family protein [Mycobacterium tuberculosis str. H37Rv]                                           | 60.92 | 87 | 99 |
| fig 6666666.28482.peg.2006 | R018676 | (gi:148661598) PE19 (MRA 1805) - PE family protein [Mycobacterium tuberculosis str. H37Ra]                                        | 60.92 | 87 | 99 |
| fig 6666666.28482.peg.2006 | R019879 | (gi:340626803) PE19 (MCAN 18091) - PE family protein [Mycobacterium canettii str. CIPT 140010059]                                 | 60.92 | 87 | 99 |
| fig 6666666.28482.peg.2006 | R019881 | (gi:224990176) PE19 (JTY 1807) - PE family protein [Mycobacterium bovis str. BCG str. Tokyo 172]                                  | 60.92 | 87 | 99 |
| fig 6666666.28482.peg.2006 | R018679 | (gi:121637692) PE19 (BCG 1823) - PE family protein [Mycobacterium bovis str. BCG Pasteur 1173P2]                                  | 60.92 | 87 | 99 |
| fig 6666666.28482.peg.2006 | R018678 | (gi:31792979) PE19 (Mb1819) - PE family protein [Mycobacterium bovis str. AF2122/97]                                              | 60.92 | 87 | 99 |
| fig 6666666.28482.peg.2006 | R019878 | (gi:339631845) PE19 (MAF 18130) - PE family protein [Mycobacterium africanum str. GM041182]                                       | 60.92 | 87 | 99 |
| fig 6666666.28482.peg.2006 | R019880 | (gi:253799168) PE19 (TBMG 02205) - PE family protein [Mycobacterium tuberculosis str. KZN 1435]                                   | 60.92 | 87 | 99 |
| fig 6666666.28482.peg.2006 | R018674 | (gi:148823006) PE19 (TBFG 11821) - PE family protein [Mycobacterium tuberculosis str. F11]                                        | 60.92 | 87 | 99 |
| fig 6666666.28482.peg.2006 | R018677 | (gi:15841261) PE19 (MT1840) - PE family protein [Mycobacterium tuberculosis str. CDC1551]                                         | 60.92 | 87 | 99 |
| fig 6666666.28482.peg.2172 | R019039 | (gi:253798546) mbtH (TBMG 01598) - hypothetical protein [Mycobacterium tuberculosis str. KZN 1435]                                | 78.87 | 71 | 71 |
| fig 6666666.28482.peg.2172 | R013460 | (gi:148823579) mbtH (TBFG 12402) - hypothetical mycobactin/exochelin synthesis protein mbtH [Mycobacterium tuberculosis str. F11] | 78.87 | 71 | 71 |
| fig 6666666.28482.peg.2172 | R005850 | (gi:15841889) mbtH (MT2445.1) - mbtH protein [Mycobacterium tuberculosis str. CDC1551]                                            | 78.87 | 71 | 71 |
| fig 6666666.28482.peg.2172 | R019038 | (gi:340627388) mbtH (MCAN 24091) - hypothetical protein [Mycobacterium canettii str. CIPT 140010059]                              | 78.87 | 71 | 71 |
| fig 6666666.28482.peg.2172 | R019040 | (gi:224990750) mbtH (JTY 2385) - hypothetical protein [Mycobacterium bovis str. BCG str. Tokyo 172]                               | 78.87 | 71 | 71 |

|                            |         |                                                                                                            |       |    |    |
|----------------------------|---------|------------------------------------------------------------------------------------------------------------|-------|----|----|
| fig 6666666.28482.peg.2172 | R005852 | (gi:121638256) mbtH (BCG 2391c) - putative protein mbtH [Mycobacterium bovis str. BCG Pasteur 1173P2]      | 78.87 | 71 | 71 |
| fig 6666666.28482.peg.2172 | R005851 | (gi:31793554) mbtH (Mb2398c) - PUTATIVE CONSERVED PROTEIN MBTH [Mycobacterium bovis str. AF2122/97]        | 78.87 | 71 | 71 |
| fig 6666666.28482.peg.2172 | R019037 | (gi:339632403) mbtH (MAF 23910) - putative conserved protein MBTH [Mycobacterium africanum str. GM041182]  | 78.87 | 71 | 71 |
| fig 6666666.28482.peg.2172 | R005848 | (gi:15609514) mbtH (Rv2377c) - PUTATIVE CONSERVED PROTEIN MBTH [Mycobacterium tuberculosis str. H37Rv]     | 77.46 | 71 | 71 |
| fig 6666666.28482.peg.2172 | R005849 | (gi:148662209) mbtH (MRA 2400) - protein MbtH [Mycobacterium tuberculosis str. H37Ra]                      | 77.46 | 71 | 71 |
| fig 6666666.28482.peg.2172 | R005859 | (gi:126436052) mbtH (Mjls 3474) - MbtH domain protein [Mycobacterium sp. str. JLS]                         | 71.83 | 71 | 71 |
| fig 6666666.28482.peg.2172 | R019035 | (gi:183983167) mbtH (MMAR 3173) - protein MbtH [Mycobacterium marinum str. M]                              | 71.83 | 71 | 71 |
| fig 6666666.28482.peg.2172 | R005861 | (gi:108800429) mbtH (Mmcs 3463) - MbtH-like protein [Mycobacterium sp. str. MCS]                           | 71.83 | 71 | 71 |
| fig 6666666.28482.peg.2172 | R005860 | (gi:119869558) mbtH (Mkms 3526) - MbtH domain protein [Mycobacterium sp. str. KMS]                         | 71.83 | 71 | 71 |
| fig 6666666.28482.peg.2172 | R019036 | (gi:169631178) mbtH (MAB 4100c) - MbtH-like protein [Mycobacterium abscessus str. ATCC 19977]              | 71.01 | 69 | 71 |
| fig 6666666.28482.peg.2172 | R005856 | (gi:118470732) mbtH (MSMEG 4508) - hypothetical protein [Mycobacterium smegmatis str. MC2 155]             | 72.06 | 68 | 71 |
| fig 6666666.28482.peg.2172 | R005857 | (gi:145223286) mbtH (Mflv 2699) - MbtH-like protein [Mycobacterium gilvum str. PYR-GCK]                    | 70    | 70 | 71 |
| fig 6666666.28482.peg.2172 | R005855 | (gi:118618911) mbtH (MUL 3639) - conserved hypothetical protein MbtH 1 [Mycobacterium ulcerans str. Agy99] | 66.2  | 71 | 71 |
| fig 6666666.28482.peg.2172 | R005858 | (gi:120404800) mbtH (Mvan 3842) - MbtH domain protein [Mycobacterium vanbaalenii str. PYR-1]               | 66.67 | 71 | 71 |
| fig 6666666.28482.peg.2172 | R005853 | (gi:41408267) mbtH (MAP2169c) - MbtH 3 [Mycobacterium avium str. K-10 (subsp. paratuberculosis)]           | 66.2  | 71 | 71 |
| fig 6666666.28482.peg.2172 | R005854 | (gi:118464383) mbtH (MAV 2016) - hypothetical protein [Mycobacterium avium str. 104]                       | 66.2  | 71 | 71 |

|                            |         |                                                                                                                                                   |       |     |     |
|----------------------------|---------|---------------------------------------------------------------------------------------------------------------------------------------------------|-------|-----|-----|
| fig 6666666.28482.peg.2172 | R019041 | (gi:333990185) mbtH (JDM601 1545) - MbtH-like protein [Mycobacterium sp. str. JDM601]                                                             | 63.51 | 71  | 71  |
| fig 6666666.28482.peg.2172 | R018198 | (gi:118469728) MSMEG0016 - hypothetical protein [Mycobacterium smegmatis str. MC2 155]                                                            | 64.29 | 67  | 71  |
| fig 6666666.28482.peg.2173 | R019046 | (gi:253798545) mbtG (TBMG 01597) - lysine-N-oxygenase mbtG [Mycobacterium tuberculosis str. KZN 1435]                                             | 88.66 | 432 | 434 |
| fig 6666666.28482.peg.2173 | R005862 | (gi:15609515) mbtG (Rv2378c) - LYSINE-N-OXYGENASE MBTG (L-LYSINE 6-MONOOXYGENASE) (LYSINE N6-HYDROXYLASE) [Mycobacterium tuberculosis str. H37Rv] | 88.66 | 432 | 434 |
| fig 6666666.28482.peg.2173 | R005863 | (gi:148662210) mbtG (MRA 2401) - lysine-N-oxygenase Mbtg [Mycobacterium tuberculosis str. H37Ra]                                                  | 88.66 | 432 | 434 |
| fig 6666666.28482.peg.2173 | R013461 | (gi:148823580) mbtG (TBFG 12403) - lysine-N-oxygenase mbtG [Mycobacterium tuberculosis str. F11]                                                  | 88.66 | 432 | 434 |
| fig 6666666.28482.peg.2173 | R005864 | (gi:15841890) mbtG (MT2446) - hypothetical protein [Mycobacterium tuberculosis str. CDC1551]                                                      | 88.66 | 432 | 434 |
| fig 6666666.28482.peg.2173 | R019047 | (gi:224990751) mbtG (JTY 2386) - lysine-N-oxygenase [Mycobacterium bovis str. BCG str. Tokyo 172]                                                 | 88.66 | 432 | 434 |
| fig 6666666.28482.peg.2173 | R005866 | (gi:121638257) mbtG (BCG 2392c) - Lysine-N-oxygenase mbtG [Mycobacterium bovis str. BCG Pasteur 1173P2]                                           | 88.66 | 432 | 434 |
| fig 6666666.28482.peg.2173 | R005865 | (gi:31793555) mbtG (Mb2399c) - LYSINE-N-OXYGENASE MBTG (L-LYSINE 6-MONOOXYGENASE) (LYSINE N6-HYDROXYLASE) [Mycobacterium bovis str. AF2122/97]    | 88.66 | 432 | 434 |
| fig 6666666.28482.peg.2173 | R019044 | (gi:339632404) mbtG (MAF 23920) - lysine-N-oxygenase MBTG (L-Lysine 6-monooxygenase) [Mycobacterium africanum str. GM041182]                      | 88.66 | 432 | 434 |
| fig 6666666.28482.peg.2173 | R019045 | (gi:340627389) mbtG (MCAN 24101) - lysine-N-oxygenase MBTG [Mycobacterium canettii str. CIPT 140010059]                                           | 88.43 | 432 | 434 |
| fig 6666666.28482.peg.2173 | R005868 | (gi:118463821) mbtG (MAV 2015) - MbtG protein [Mycobacterium avium str. 104]                                                                      | 88.02 | 434 | 434 |
| fig 6666666.28482.peg.2173 | R005867 | (gi:41408268) mbtG (MAP2170c) - MbtG [Mycobacterium avium str. K-10 (subsp. paratuberculosis)]                                                    | 87.79 | 434 | 434 |
| fig 6666666.28482.peg.2173 | R005870 | (gi:118467820) mbtG (MSMEG 4509) - MbtG protein [Mycobacterium smegmatis str. MC2 155]                                                            | 76.33 | 429 | 434 |

|                            |         |                                                                                                                      |       |      |      |
|----------------------------|---------|----------------------------------------------------------------------------------------------------------------------|-------|------|------|
| fig 6666666.28482.peg.2173 | R005871 | (gi:145223285) mbtG (Mflv 2698) - FAD dependent oxidoreductase [Mycobacterium gilvum str. PYR-GCK]                   | 76.39 | 432  | 434  |
| fig 6666666.28482.peg.2173 | R005872 | (gi:120404801) mbtG (Mvan 3843) - FAD dependent oxidoreductase [Mycobacterium vanbaalenii str. PYR-1]                | 74.77 | 432  | 434  |
| fig 6666666.28482.peg.2173 | R019048 | (gi:333990184) mbtG (JDM601 1544) - lysine-N-oxygenase MbtG [Mycobacterium sp. str. JDM601]                          | 81.4  | 429  | 434  |
| fig 6666666.28482.peg.2173 | R005875 | (gi:108800430) mbtG (Mmcs 3464) - FAD dependent oxidoreductase [Mycobacterium sp. str. MCS]                          | 75.29 | 433  | 434  |
| fig 6666666.28482.peg.2173 | R005874 | (gi:119869559) mbtG (Mkms 3527) - FAD dependent oxidoreductase [Mycobacterium sp. str. KMS]                          | 75.29 | 433  | 434  |
| fig 6666666.28482.peg.2173 | R005873 | (gi:126436053) mbtG (Mjls 3475) - FAD dependent oxidoreductase [Mycobacterium sp. str. JLS]                          | 75.35 | 433  | 434  |
| fig 6666666.28482.peg.2173 | R019043 | (gi:169629335) mbtG (MAB 2249) - lysine-N-oxygenase MbtG [Mycobacterium abscessus str. ATCC 19977]                   | 68.13 | 433  | 434  |
| fig 6666666.28482.peg.2173 | R005869 | (gi:118618912) mbtG (MUL 3640) - lysine-N-oxygenase MbtG [Mycobacterium ulcerans str. Agy99]                         | 69.28 | 431  | 434  |
| fig 6666666.28482.peg.2173 | R019042 | (gi:183983677) mbtG (MMAR 3697) - lysine-N-oxygenase MbtG [Mycobacterium marinum str. M]                             | 69.52 | 431  | 434  |
| fig 6666666.28482.peg.2174 | R019052 | (gi:340627390) mbtF (MCAN 24111) - peptide synthetase [Mycobacterium canettii str. CIPT 140010059]                   | 74.88 | 1445 | 1447 |
| fig 6666666.28482.peg.2174 | R019053 | (gi:253798544) mbtF (TBMG 01596) - peptide synthetase mbtF [Mycobacterium tuberculosis str. KZN 1435]                | 74.81 | 1445 | 1447 |
| fig 6666666.28482.peg.2174 | R005878 | (gi:15841891) mbtF (MT2447) - peptide synthetase [Mycobacterium tuberculosis str. CDC1551]                           | 74.81 | 1445 | 1447 |
| fig 6666666.28482.peg.2174 | R019051 | (gi:339632405) mbtF (MAF 23930) - peptide synthetase MBTF (peptide synthase) [Mycobacterium africanum str. GM041182] | 74.81 | 1445 | 1447 |
| fig 6666666.28482.peg.2174 | R005876 | (gi:15609516) mbtF (Rv2379c) - PEPTIDE SYNTHETASE MBTF (PEPTIDE SYNTHASE) [Mycobacterium tuberculosis str. H37Rv]    | 74.83 | 1445 | 1447 |
| fig 6666666.28482.peg.2174 | R005877 | (gi:148662211) mbtF (MRA 2402) - peptide synthetase [Mycobacterium tuberculosis str. H37Ra]                          | 74.83 | 1445 | 1447 |
| fig 6666666.28482.peg.2174 | R013462 | (gi:148823581) mbtF (TBFG 12404) - peptide synthetase mbtF [Mycobacterium tuberculosis str. F11]                     | 74.74 | 1445 | 1447 |

|                            |         |                                                                                                                   |       |      |      |
|----------------------------|---------|-------------------------------------------------------------------------------------------------------------------|-------|------|------|
| fig 6666666.28482.peg.2174 | R019054 | (gi:224990752) mbtF (JTY 2387) - peptide synthetase [Mycobacterium bovis str. BCG str. Tokyo 172]                 | 74.74 | 1445 | 1447 |
| fig 6666666.28482.peg.2174 | R005880 | (gi:121638258) mbtF (BCG 2393c) - Peptide synthetase mbtF [Mycobacterium bovis str. BCG Pasteur 1173P2]           | 74.74 | 1445 | 1447 |
| fig 6666666.28482.peg.2174 | R005879 | (gi:31793556) mbtF (Mb2400c) - PEPTIDE SYNTHETASE MBTF (PEPTIDE SYNTHASE) [Mycobacterium bovis str. AF2122/97]    | 74.74 | 1445 | 1447 |
| fig 6666666.28482.peg.2174 | R005889 | (gi:108800431) mbtF (Mmcs 3465) - Amino acid adenylation [Mycobacterium sp. str. MCS]                             | 65.66 | 1438 | 1447 |
| fig 6666666.28482.peg.2174 | R005888 | (gi:119869560) mbtF (Mkms 3528) - amino acid adenylation domain [Mycobacterium sp. str. KMS]                      | 65.66 | 1438 | 1447 |
| fig 6666666.28482.peg.2174 | R005887 | (gi:126436054) mbtF (Mjls 3476) - amino acid adenylation domain [Mycobacterium sp. str. JLS]                      | 65.45 | 1438 | 1447 |
| fig 6666666.28482.peg.2174 | R005885 | (gi:145223284) mbtF (Mflv 2697) - amino acid adenylation domain [Mycobacterium gilvum str. PYR-GCK]               | 62.56 | 1437 | 1447 |
| fig 6666666.28482.peg.2174 | R005882 | (gi:118462908) mbtF (MAV 2014) - putative sulfotransferase [Mycobacterium avium str. 104]                         | 60.07 | 1441 | 1447 |
| fig 6666666.28482.peg.2174 | R005884 | (gi:118470694) mbtF (MSMEG 4510) - peptide synthetase mbtF [Mycobacterium smegmatis str. MC2 155]                 | 61    | 1447 | 1447 |
| fig 6666666.28482.peg.2174 | R005881 | (gi:41408269) mbtF (MAP2171c) - MbtF [Mycobacterium avium str. K-10 (subsp. paratuberculosis)]                    | 60.38 | 1203 | 1447 |
| fig 6666666.28482.peg.2175 | R019060 | (gi:253798543) mbtE (TBMG 01595) - peptide synthetase mbtE [Mycobacterium tuberculosis str. KZN 1435]             | 78.9  | 1720 | 1720 |
| fig 6666666.28482.peg.2175 | R013463 | (gi:148823582) mbtE (TBFG 12405) - peptide synthetase mbtE [Mycobacterium tuberculosis str. F11]                  | 78.9  | 1720 | 1720 |
| fig 6666666.28482.peg.2175 | R005892 | (gi:15841892) mbtE (MT2448) - peptide synthetase [Mycobacterium tuberculosis str. CDC1551]                        | 78.85 | 1720 | 1720 |
| fig 6666666.28482.peg.2175 | R005890 | (gi:15609517) mbtE (Rv2380c) - PEPTIDE SYNTHETASE MBTE (PEPTIDE SYNTHASE) [Mycobacterium tuberculosis str. H37Rv] | 79.77 | 1676 | 1720 |
| fig 6666666.28482.peg.2175 | R005891 | (gi:148662212) mbtE (MRA 2403) - peptide synthetase [Mycobacterium tuberculosis str. H37Ra]                       | 79.77 | 1676 | 1720 |
| fig 6666666.28482.peg.2175 | R019061 | (gi:224990753) mbtE (JTY 2388) - peptide synthetase [Mycobacterium bovis str. BCG str. Tokyo 172]                 | 79.77 | 1676 | 1720 |

|                            |         |                                                                                                                         |       |      |      |
|----------------------------|---------|-------------------------------------------------------------------------------------------------------------------------|-------|------|------|
| fig 6666666.28482.peg.2175 | R005894 | (gi:121638259) mbtE (BCG 2394c) - Peptide synthetase mbtE [Mycobacterium bovis str. BCG Pasteur 1173P2]                 | 79.77 | 1676 | 1720 |
| fig 6666666.28482.peg.2175 | R005893 | (gi:31793557) mbtE (Mb2401c) - PEPTIDE SYNTHETASE MBTE (PEPTIDE SYNTHASE) [Mycobacterium bovis str. AF2122/97]          | 79.77 | 1676 | 1720 |
| fig 6666666.28482.peg.2175 | R019058 | (gi:339632406) mbtE (MAF 23940) - peptide synthetase MBTE (peptide synthase) [Mycobacterium africanum str. GM041182]    | 79.77 | 1676 | 1720 |
| fig 6666666.28482.peg.2175 | R019059 | (gi:340627391) mbtE (MCAN 24121) - peptide synthetase [Mycobacterium canettii str. CIPT 140010059]                      | 79.72 | 1676 | 1720 |
| fig 6666666.28482.peg.2175 | R005903 | (gi:108800432) mbtE (Mmcs 3466) - Amino acid adenylation [Mycobacterium sp. str. MCS]                                   | 71.74 | 1684 | 1720 |
| fig 6666666.28482.peg.2175 | R005902 | (gi:119869561) mbtE (Mkms 3529) - amino acid adenylation domain [Mycobacterium sp. str. KMS]                            | 71.74 | 1684 | 1720 |
| fig 6666666.28482.peg.2175 | R005901 | (gi:126436055) mbtE (Mjls 3477) - amino acid adenylation domain [Mycobacterium sp. str. JLS]                            | 71.62 | 1684 | 1720 |
| fig 6666666.28482.peg.2175 | R005900 | (gi:120404803) mbtE (Mvan 3845) - amino acid adenylation domain [Mycobacterium vanbaalenii str. PYR-1]                  | 66.4  | 1717 | 1720 |
| fig 6666666.28482.peg.2175 | R005898 | (gi:118470602) mbtE (MSMEG 4511) - linear gramicidin synthetase subunit B [Mycobacterium smegmatis str. MC2 155]        | 68.41 | 1592 | 1720 |
| fig 6666666.28482.peg.2175 | R005899 | (gi:145223283) mbtE (Mflv 2696) - amino acid adenylation domain [Mycobacterium gilvum str. PYR-GCK]                     | 66.6  | 1564 | 1720 |
| fig 6666666.28482.peg.2175 | R005896 | (gi:118462221) mbtE (MAV 2013) - linear gramicidin synthetase subunit D [Mycobacterium avium str. 104]                  | 66.21 | 1506 | 1720 |
| fig 6666666.28482.peg.2175 | R005895 | (gi:41408271) mbtE (MAP2173c) - MbtE [Mycobacterium avium str. K-10 (subsp. paratuberculosis)]                          | 66.02 | 1506 | 1720 |
| fig 6666666.28482.peg.2175 | R019062 | (gi:333990182) mbtE (JDM601 1542) - non-ribosomal peptide synthetase MbtE [Mycobacterium sp. str. JDM601]               | 60.37 | 1491 | 1720 |
| fig 6666666.28482.peg.2176 | R019067 | (gi:253798542) mbtD (TBMG 01594) - polyketide synthetase mbtD [Mycobacterium tuberculosis str. KZN 1435]                | 64.88 | 979  | 986  |
| fig 6666666.28482.peg.2176 | R005904 | (gi:15609518) mbtD (Rv2381c) - POLYKETIDE SYNTHETASE MBTD (POLYKETIDE SYNTHASE) [Mycobacterium tuberculosis str. H37Rv] | 64.88 | 979  | 986  |
| fig 6666666.28482.peg.2176 | R005905 | (gi:148662213) mbtD (MRA 2404) - putative polyketide synthase MbtD [Mycobacterium tuberculosis str. H37Ra]              | 64.88 | 979  | 986  |

|                            |         |                                                                                                                            |       |     |     |
|----------------------------|---------|----------------------------------------------------------------------------------------------------------------------------|-------|-----|-----|
| fig 6666666.28482.peg.2176 | R013464 | (gi:148823583) mbtD (TBFG 12406) - polyketide synthetase mbtD [Mycobacterium tuberculosis str. F11]                        | 64.88 | 979 | 986 |
| fig 6666666.28482.peg.2176 | R019068 | (gi:224990754) mbtD (JTY 2389) - polyketide synthetase [Mycobacterium bovis str. BCG str. Tokyo 172]                       | 64.88 | 979 | 986 |
| fig 6666666.28482.peg.2176 | R005908 | (gi:121638260) mbtD (BCG 2395c) - Polyketide synthetase mbtD [Mycobacterium bovis str. BCG Pasteur 1173P2]                 | 64.88 | 979 | 986 |
| fig 6666666.28482.peg.2176 | R005907 | (gi:31793558) mbtD (Mb2402c) - POLYKETIDE SYNTHETASE MBTD (POLYKETIDE SYNTHASE) [Mycobacterium bovis str. AF2122/97]       | 64.88 | 979 | 986 |
| fig 6666666.28482.peg.2176 | R019065 | (gi:339632407) mbtD (MAF 23950) - polyketide synthetase MBTD (polyketide synthase) [Mycobacterium africanum str. GM041182] | 64.88 | 979 | 986 |
| fig 6666666.28482.peg.2176 | R005906 | (gi:15841893) mbtD (MT2449) - polyketide synthase, putative [Mycobacterium tuberculosis str. CDC1551]                      | 64.88 | 979 | 986 |
| fig 6666666.28482.peg.2176 | R019066 | (gi:340627392) mbtD (MCAN 24131) - polyketide synthetase MBTD [Mycobacterium canettii str. CIPT 140010059]                 | 64.78 | 979 | 986 |
| fig 6666666.28482.peg.2177 | R005920 | (gi:15841894) mbtC (MT2450) - polyketide synthase [Mycobacterium tuberculosis str. CDC1551]                                | 89.15 | 433 | 437 |
| fig 6666666.28482.peg.2177 | R019074 | (gi:253798541) mbtC (TBMG 01593) - polyketide synthetase mbtC [Mycobacterium tuberculosis str. KZN 1435]                   | 89.15 | 433 | 437 |
| fig 6666666.28482.peg.2177 | R005918 | (gi:15609519) mbtC (Rv2382c) - POLYKETIDE SYNTHETASE MBTC (POLYKETIDE SYNTHASE) [Mycobacterium tuberculosis str. H37Rv]    | 89.15 | 433 | 437 |
| fig 6666666.28482.peg.2177 | R005919 | (gi:148662214) mbtC (MRA 2405) - Polyketide synthetase MbtC [Mycobacterium tuberculosis str. H37Ra]                        | 89.15 | 433 | 437 |
| fig 6666666.28482.peg.2177 | R013465 | (gi:148823584) mbtC (TBFG 12407) - polyketide synthetase mbtC [Mycobacterium tuberculosis str. F11]                        | 89.15 | 433 | 437 |
| fig 6666666.28482.peg.2177 | R019073 | (gi:340627393) mbtC (MCAN 24141) - polyketide synthetase MBTC [Mycobacterium canettii str. CIPT 140010059]                 | 89.15 | 433 | 437 |
| fig 6666666.28482.peg.2177 | R019075 | (gi:224990755) mbtC (JTY 2390) - polyketide synthetase [Mycobacterium bovis str. BCG str. Tokyo 172]                       | 89.15 | 433 | 437 |
| fig 6666666.28482.peg.2177 | R005922 | (gi:121638261) mbtC (BCG 2396c) - Polyketide synthetase mbtC [Mycobacterium bovis str. BCG Pasteur 1173P2]                 | 89.15 | 433 | 437 |
| fig 6666666.28482.peg.2177 | R005921 | (gi:31793559) mbtC (Mb2403c) - POLYKETIDE SYNTHETASE MBTC (POLYKETIDE SYNTHASE) [Mycobacterium bovis str. AF2122/97]       | 89.15 | 433 | 437 |

|                            |         |                                                                                                                                      |       |      |      |
|----------------------------|---------|--------------------------------------------------------------------------------------------------------------------------------------|-------|------|------|
| fig 6666666.28482.peg.2177 | R019072 | (gi:339632408) mbtC (MAF 23960) - polyketide synthetase MBTC (polyketide synthase) [Mycobacterium africanum str. GM041182]           | 89.15 | 433  | 437  |
| fig 6666666.28482.peg.2177 | R005929 | (gi:126436057) mbtC (Mjls 3479) - beta-ketoacyl synthase [Mycobacterium sp. str. JLS]                                                | 77.86 | 429  | 437  |
| fig 6666666.28482.peg.2177 | R005931 | (gi:108800434) mbtC (Mmcs 3468) - beta-ketoacyl synthase [Mycobacterium sp. str. MCS]                                                | 77.39 | 429  | 437  |
| fig 6666666.28482.peg.2177 | R005930 | (gi:119869563) mbtC (Mkms 3531) - beta-ketoacyl synthase [Mycobacterium sp. str. KMS]                                                | 77.39 | 429  | 437  |
| fig 6666666.28482.peg.2177 | R005926 | (gi:118468534) mbtC (MSMEG 4513) - polyketide synthase [Mycobacterium smegmatis str. MC2 155]                                        | 78.09 | 429  | 437  |
| fig 6666666.28482.peg.2177 | R005928 | (gi:120404805) mbtC (Mvan 3847) - beta-ketoacyl synthase [Mycobacterium vanbaalenii str. PYR-1]                                      | 77.49 | 431  | 437  |
| fig 6666666.28482.peg.2177 | R005924 | (gi:118467200) mbtC (MAV 2011) - erythronolide synthase, modules 1 and 2 [Mycobacterium avium str. 104]                              | 72.08 | 430  | 437  |
| fig 6666666.28482.peg.2177 | R005923 | (gi:41408273) mbtC (MAP2175c) - MbtC [Mycobacterium avium str. K-10 (subsp. paratuberculosis)]                                       | 72.08 | 430  | 437  |
| fig 6666666.28482.peg.2177 | R005927 | (gi:145223281) mbtC (Mflv 2694) - beta-ketoacyl synthase [Mycobacterium gilvum str. PYR-GCK]                                         | 70.93 | 430  | 437  |
| fig 6666666.28482.peg.2177 | R019076 | (gi:333990180) mbtC (JDM601 1540) - polyketide synthase MbtC [Mycobacterium sp. str. JDM601]                                         | 66.28 | 428  | 437  |
| fig 6666666.28482.peg.2178 | R019080 | (gi:340627394) mbtB (MCAN 24151) - phenyloxazoline synthase [Mycobacterium canettii str. CIPT 140010059]                             | 76.62 | 1407 | 1407 |
| fig 6666666.28482.peg.2178 | R019081 | (gi:253798540) mbtB (TBMG 01592) - phenyloxazoline synthase mbtB [Mycobacterium tuberculosis str. KZN 1435]                          | 76.62 | 1407 | 1407 |
| fig 6666666.28482.peg.2178 | R005932 | (gi:15609520) mbtB (Rv2383c) - PHENYLOXAZOLINE SYNTHASE MBTB (PHENYLOXAZOLINE SYNTHETASE) [Mycobacterium tuberculosis str. H37Rv]    | 76.62 | 1407 | 1407 |
| fig 6666666.28482.peg.2178 | R005933 | (gi:148662215) mbtB (MRA 2406) - dihydroaeruginosic acid synthetase [Mycobacterium tuberculosis str. H37Ra]                          | 76.62 | 1407 | 1407 |
| fig 6666666.28482.peg.2178 | R013466 | (gi:148823585) mbtB (TBFG 12408) - phenyloxazoline synthase mbtB [Mycobacterium tuberculosis str. F11]                               | 76.62 | 1407 | 1407 |
| fig 6666666.28482.peg.2178 | R019079 | (gi:339632409) mbtB (MAF 23970) - phenyloxazoline synthase MBTB (phenyloxazoline synthetase) [Mycobacterium africanum str. GM041182] | 76.62 | 1407 | 1407 |



|                            |         |                                                                                                                                                                 |       |      |      |
|----------------------------|---------|-----------------------------------------------------------------------------------------------------------------------------------------------------------------|-------|------|------|
| fig 6666666.28482.peg.2178 | R005935 | (gi:31793560) mbtB (Mb2404c) - PHENYLOXAZOLINE SYNTHASE MBTB (PHENYLOXAZOLINE SYNTHETASE) [Mycobacterium bovis str. AF2122/97]                                  | 76.55 | 1407 | 1407 |
| fig 6666666.28482.peg.2178 | R005934 | (gi:15841895) mbtB (MT2451) - dihydroaeruginic acid synthetase [Mycobacterium tuberculosis str. CDC1551]                                                        | 76.55 | 1407 | 1407 |
| fig 6666666.28482.peg.2178 | R019082 | (gi:224990756) mbtB (JTY 2391) - phenyloxazoline synthase [Mycobacterium bovis str. BCG str. Tokyo 172]                                                         | 76.55 | 1407 | 1407 |
| fig 6666666.28482.peg.2178 | R005936 | (gi:121638262) mbtB (BCG 2397c) - Phenyloxazoline synthase mbtB [Mycobacterium bovis str. BCG Pasteur 1173P2]                                                   | 76.55 | 1407 | 1407 |
| fig 6666666.28482.peg.2178 | R005938 | (gi:118464419) mbtB (MAV 2009) - MbtB protein [Mycobacterium avium str. 104]                                                                                    | 75.71 | 1155 | 1407 |
| fig 6666666.28482.peg.2178 | R005937 | (gi:41408275) mbtB (MAP2177c) - MbtB [Mycobacterium avium str. K-10 (subsp. paratuberculosis)]                                                                  | 75.28 | 1155 | 1407 |
| fig 6666666.28482.peg.2178 | R005940 | (gi:118469771) mbtB (MSMEG 4515) - putative non-ribosomal peptide synthetase [Mycobacterium smegmatis str. MC2 155]                                             | 62.28 | 1157 | 1407 |
| fig 6666666.28482.peg.2178 | R019083 | (gi:333990169) mbtB (JDM601 1529) - phenyloxazoline synthase MbtB [Mycobacterium sp. str. JDM601]                                                               | 65.45 | 1161 | 1407 |
| fig 6666666.28482.peg.2178 | R005943 | (gi:126436059) mbtB (Mjls 3481) - amino acid adenylation domain [Mycobacterium sp. str. JLS]                                                                    | 62.56 | 1160 | 1407 |
| fig 6666666.28482.peg.2178 | R005945 | (gi:108800436) mbtB (Mmcs 3470) - Amino acid adenylation [Mycobacterium sp. str. MCS]                                                                           | 62.05 | 1160 | 1407 |
| fig 6666666.28482.peg.2178 | R005944 | (gi:119869565) mbtB (Mkms 3533) - amino acid adenylation domain [Mycobacterium sp. str. KMS]                                                                    | 62.05 | 1160 | 1407 |
| fig 6666666.28482.peg.2178 | R005942 | (gi:120404807) mbtB (Mvan 3849) - amino acid adenylation domain [Mycobacterium vanbaalenii str. PYR-1]                                                          | 60.36 | 1156 | 1407 |
| fig 6666666.28482.peg.2179 | R019087 | (gi:340627395) mbtA (MCAN 24161) - bifunctional salicyl-AMP ligase/salicyl-S-ArCP synthetase [Mycobacterium canettii str. CIPT 140010059]                       | 78.89 | 537  | 547  |
| fig 6666666.28482.peg.2179 | R019088 | (gi:253798539) mbtA (TBMG 01591) - bifunctional salicyl-AMP ligase/salicyl-S-arcp synthetase mbtA [Mycobacterium tuberculosis str. KZN 1435]                    | 78.89 | 537  | 547  |
| fig 6666666.28482.peg.2179 | R005946 | (gi:15609521) mbtA (Rv2384) - BIFUNCTIONAL ENZYME MBTA: SALICYL-AMP LIGASE (SAL-AMP LIGASE) + SALICYL-S-ArCP SYNTHETASE [Mycobacterium tuberculosis str. H37Rv] | 78.89 | 537  | 547  |

|                            |         |                                                                                                                                                                     |       |     |     |
|----------------------------|---------|---------------------------------------------------------------------------------------------------------------------------------------------------------------------|-------|-----|-----|
| fig 6666666.28482.peg.2179 | R005947 | (gi:148662216) mbtA (MRA 2407) - 2,3-dihydroxybenzoate-AMP ligase [Mycobacterium tuberculosis str. H37Ra]                                                           | 78.89 | 537 | 547 |
| fig 6666666.28482.peg.2179 | R013467 | (gi:148823586) mbtA (TBFG 12409) - bifunctional enzyme mbtA: salicyl-AMP ligase + salicyl-S-arcp synthetase [Mycobacterium tuberculosis str. F11]                   | 78.89 | 537 | 547 |
| fig 6666666.28482.peg.2179 | R005948 | (gi:15841896) mbtA (MT2452) - 2,3-dihydroxybenzoate-AMP ligase [Mycobacterium tuberculosis str. CDC1551]                                                            | 78.89 | 537 | 547 |
| fig 6666666.28482.peg.2179 | R019089 | (gi:224990757) mbtA (JTY 2392) - salicyl-AMP ligase [Mycobacterium bovis str. BCG str. Tokyo 172]                                                                   | 78.89 | 537 | 547 |
| fig 6666666.28482.peg.2179 | R005950 | (gi:121638263) mbtA (BCG 2398) - Bifunctional enzyme mbtA: salicyl-AMP ligase + salicyl-S-ArCP synthetase [Mycobacterium bovis str. BCG Pasteur 1173P2]             | 78.89 | 537 | 547 |
| fig 6666666.28482.peg.2179 | R005949 | (gi:31793561) mbtA (Mb2405) - BIFUNCTIONAL ENZYME MBTA: SALICYL-AMP LIGASE (SAL-AMP LIGASE) + SALICYL-S-ArCP SYNTHETASE [Mycobacterium bovis str. AF2122/97]        | 78.89 | 537 | 547 |
| fig 6666666.28482.peg.2179 | R019086 | (gi:339632410) mbtA (MAF 23980) - bifunctional enzyme MBTA: salicyl-AMP ligase (SAL-AMP ligase) + salicyl-S-ArCP synthetase [Mycobacterium africanum str. GM041182] | 78.89 | 537 | 547 |
| fig 6666666.28482.peg.2179 | R005952 | (gi:118462251) mbtA (MAV 2008) - 2,3-dihydroxybenzoate-AMP ligase [Mycobacterium avium str. 104]                                                                    | 76.47 | 544 | 547 |
| fig 6666666.28482.peg.2179 | R019084 | (gi:183983678) mbtA (MMAR 3698) - bifunctional enzyme MbtA: salicyl-AMP ligase (SAL-AMP ligase) + salicyl-S-ACP synthetase [Mycobacterium marinum str. M]           | 69.85 | 541 | 547 |
| fig 6666666.28482.peg.2179 | R005953 | (gi:118618913) mbtA (MUL 3641) - bifunctional enzyme MbtA: salicyl-AMP ligase (SAL-AMP ligase) + salicyl-S-ACP synthetase [Mycobacterium ulcerans str. Agy99]       | 69.96 | 533 | 547 |
| fig 6666666.28482.peg.2179 | R005954 | (gi:118468444) mbtA (MSMEG 4516) - 2,3-dihydroxybenzoate-AMP ligase [Mycobacterium smegmatis str. MC2 155]                                                          | 68.33 | 536 | 547 |
| fig 6666666.28482.peg.2179 | R005957 | (gi:126436060) mbtA (Mjls 3482) - AMP-dependent synthetase and ligase [Mycobacterium sp. str. JLS]                                                                  | 64.37 | 532 | 547 |
| fig 6666666.28482.peg.2179 | R005959 | (gi:108800437) mbtA (Mmcs 3471) - AMP-dependent synthetase and ligase [Mycobacterium sp. str. MCS]                                                                  | 64.37 | 532 | 547 |

|                            |         |                                                                                                                                                            |       |     |     |
|----------------------------|---------|------------------------------------------------------------------------------------------------------------------------------------------------------------|-------|-----|-----|
| fig 6666666.28482.peg.2179 | R005958 | (gi:119869566) mbtA (Mkms 3534) - AMP-dependent synthetase and ligase [Mycobacterium sp. str. KMS]                                                         | 64.37 | 532 | 547 |
| fig 6666666.28482.peg.2179 | R005955 | (gi:145223278) mbtA (Mflv 2691) - AMP-dependent synthetase and ligase [Mycobacterium gilvum str. PYR-GCK]                                                  | 63.06 | 532 | 547 |
| fig 6666666.28482.peg.2179 | R019090 | (gi:333990168) mbtA (JDM601 1528) - bifunctional enzyme MbtA: salicyl-AMP ligase (SAL-AMP ligase)/salicyl-S-ACP synthetase [Mycobacterium sp. str. JDM601] | 64.26 | 508 | 547 |
| fig 6666666.28482.peg.2179 | R019085 | (gi:169629333) mbtA (MAB 2247c) - bifunctional salicyl-AMP ligase/salicyl-S-arcp synthetase [Mycobacterium abscessus str. ATCC 19977]                      | 62.66 | 533 | 547 |
| fig 6666666.28482.peg.2179 | R005956 | (gi:120404808) mbtA (Mvan 3850) - AMP-dependent synthetase and ligase [Mycobacterium vanbaalenii str. PYR-1]                                               | 62.9  | 527 | 547 |
| fig 6666666.28482.peg.2179 | R005951 | (gi:41408276) mbtA (MAP2178) - MbtA [Mycobacterium avium str. K-10 (subsp. paratuberculosis)]                                                              | 74.78 | 337 | 547 |
| fig 6666666.28482.peg.2181 | R005974 | (gi:118466860) mbtI (MAV 1792) - anthranilate synthase component I [Mycobacterium avium str. 104]                                                          | 81.11 | 450 | 450 |
| fig 6666666.28482.peg.2181 | R005973 | (gi:41408303) mbtI (MAP2205c) - anthranilate synthase component I [Mycobacterium avium str. K-10 (subsp. paratuberculosis)]                                | 80.89 | 450 | 450 |
| fig 6666666.28482.peg.2181 | R019098 | (gi:183983686) mbtI (MMAR 3706) - salicylate synthase MbtI [Mycobacterium marinum str. M]                                                                  | 78.49 | 448 | 450 |
| fig 6666666.28482.peg.2181 | R005975 | (gi:118618919) mbtI (MUL 3648) - isochorismate synthase MbtI [Mycobacterium ulcerans str. Agy99]                                                           | 77.8  | 450 | 450 |
| fig 6666666.28482.peg.2181 | R019102 | (gi:253798537) mbtI (TBMG 01589) - salicylate synthase MbtI [Mycobacterium tuberculosis str. KZN 1435]                                                     | 77.33 | 450 | 450 |
| fig 6666666.28482.peg.2181 | R005968 | (gi:57116981) mbtI (Rv2386c) - anthranilate synthase component I [Mycobacterium tuberculosis str. H37Rv]                                                   | 77.33 | 450 | 450 |
| fig 6666666.28482.peg.2181 | R005969 | (gi:148662218) mbtI (MRA 2409) - putative isochorismate synthase MbtI [Mycobacterium tuberculosis str. H37Ra]                                              | 77.33 | 450 | 450 |
| fig 6666666.28482.peg.2181 | R013469 | (gi:148823588) mbtI (TBFG 12411) - isochorismate synthase mbtI [Mycobacterium tuberculosis str. F11]                                                       | 77.33 | 450 | 450 |
| fig 6666666.28482.peg.2181 | R005970 | (gi:15841898) mbtI (MT2454) - anthranilate synthase component I [Mycobacterium tuberculosis str. CDC1551]                                                  | 77.33 | 450 | 450 |
| fig 6666666.28482.peg.2181 | R019103 | (gi:224990759) mbtI (JTY 2394) - salicylate synthase MbtI [Mycobacterium bovis str. BCG str. Tokyo 172]                                                    | 77.33 | 450 | 450 |

|                            |         |                                                                                                                      |       |     |     |
|----------------------------|---------|----------------------------------------------------------------------------------------------------------------------|-------|-----|-----|
| fig 6666666.28482.peg.2181 | R005972 | (gi:121638265) mbtI (BCG 2400c) - putative isochorismate synthase mbtI [Mycobacterium bovis str. BCG Pasteur 1173P2] | 77.33 | 450 | 450 |
| fig 6666666.28482.peg.2181 | R005971 | (gi:31793563) mbtI (Mb2407c) - anthranilate synthase component I [Mycobacterium bovis str. AF2122/97]                | 77.33 | 450 | 450 |
| fig 6666666.28482.peg.2181 | R019100 | (gi:339632412) mbtI (MAF 24000) - putative isochorismate synthase MBTI [Mycobacterium africanum str. GM041182]       | 77.33 | 450 | 450 |
| fig 6666666.28482.peg.2181 | R019101 | (gi:340627397) mbtI (MCAN 24181) - putative isochorismate synthase MBTI [Mycobacterium canettii str. CIPT 140010059] | 77.33 | 450 | 450 |
| fig 6666666.28482.peg.2181 | R005976 | (gi:118473231) mbtI (MSMEG 4524) - anthranilate synthase component I [Mycobacterium smegmatis str. MC2 155]          | 67.04 | 449 | 450 |
| fig 6666666.28482.peg.2181 | R019099 | (gi:169629331) mbtI (MAB 2245) - salicylate synthase MbtI [Mycobacterium abscessus str. ATCC 19977]                  | 64.68 | 449 | 450 |
| fig 6666666.28482.peg.2226 | R005372 | (gi:41408216) stf0 (MAP2118) - hypothetical protein [Mycobacterium avium str. K-10 (subsp. paratuberculosis)]        | 89.89 | 267 | 267 |
| fig 6666666.28482.peg.2226 | R005373 | (gi:118463655) stf0 (MAV 2058) - putative sulfotransferase [Mycobacterium avium str. 104]                            | 89.92 | 258 | 267 |
| fig 6666666.28482.peg.2226 | R005377 | (gi:108797369) stf0 (Mmcs 0389) - hypothetical protein [Mycobacterium sp. str. MCS]                                  | 85.02 | 267 | 267 |
| fig 6666666.28482.peg.2226 | R005376 | (gi:119866453) stf0 (Mkms 0398) - hypothetical protein [Mycobacterium sp. str. KMS]                                  | 85.02 | 267 | 267 |
| fig 6666666.28482.peg.2226 | R005375 | (gi:126432990) stf0 (Mjls 0377) - hypothetical protein [Mycobacterium sp. str. JLS]                                  | 85.02 | 267 | 267 |
| fig 6666666.28482.peg.2226 | R018843 | (gi:169628636) stf0 (MAB 1546c) - hypothetical protein [Mycobacterium abscessus str. ATCC 19977]                     | 83.46 | 266 | 267 |
| fig 6666666.28482.peg.2226 | R018842 | (gi:183984227) stf0 (MMAR 4255) - hypothetical protein [Mycobacterium marinum str. M]                                | 83.9  | 267 | 267 |
| fig 6666666.28482.peg.2226 | R005374 | (gi:118467454) stf0 (MSMEG 0630) - hypothetical protein [Mycobacterium smegmatis str. MC2 155]                       | 80.45 | 266 | 267 |
| fig 6666666.28482.peg.2226 | R018846 | (gi:253797222) stf0 (TBMG 00300) - hypothetical protein [Mycobacterium tuberculosis str. KZN 1435]                   | 73.41 | 267 | 267 |
| fig 6666666.28482.peg.2226 | R005367 | (gi:15607436) stf0 (Rv0295c) - hypothetical protein [Mycobacterium tuberculosis str. H37Rv]                          | 73.41 | 267 | 267 |

|                            |         |                                                                                                                         |       |     |     |
|----------------------------|---------|-------------------------------------------------------------------------------------------------------------------------|-------|-----|-----|
| fig 6666666.28482.peg.2226 | R005368 | (gi:148660061) stf0 (MRA 0304) - hypothetical protein [Mycobacterium tuberculosis str. H37Ra]                           | 73.41 | 267 | 267 |
| fig 6666666.28482.peg.2226 | R013419 | (gi:148821493) stf0 (TBFG 10302) - hypothetical protein [Mycobacterium tuberculosis str. F11]                           | 73.41 | 267 | 267 |
| fig 6666666.28482.peg.2226 | R005369 | (gi:15839681) stf0 (MT0308) - hypothetical protein [Mycobacterium tuberculosis str. CDC1551]                            | 73.41 | 267 | 267 |
| fig 6666666.28482.peg.2226 | R018845 | (gi:340625333) stf0 (MCAN 03041) - hypothetical protein [Mycobacterium canettii str. CIPT 140010059]                    | 73.41 | 267 | 267 |
| fig 6666666.28482.peg.2226 | R018847 | (gi:224988683) stf0 (JTY 0305) - hypothetical protein [Mycobacterium bovis str. BCG str. Tokyo 172]                     | 73.41 | 267 | 267 |
| fig 6666666.28482.peg.2226 | R005371 | (gi:121636210) stf0 (BCG 0335c) - hypothetical protein [Mycobacterium bovis str. BCG Pasteur 1173P2]                    | 73.41 | 267 | 267 |
| fig 6666666.28482.peg.2226 | R005370 | (gi:31791474) stf0 (Mb0303c) - hypothetical protein [Mycobacterium bovis str. AF2122/97]                                | 73.41 | 267 | 267 |
| fig 6666666.28482.peg.2226 | R018844 | (gi:339630370) stf0 (MAF 02970) - hypothetical protein [Mycobacterium africanum str. GM041182]                          | 73.41 | 267 | 267 |
| fig 6666666.28482.peg.2276 | R005515 | (gi:41406359) lpqH (MAP0261c) - hypothetical protein [Mycobacterium avium str. K-10 (subsp. paratuberculosis)]          | 78.1  | 103 | 106 |
| fig 6666666.28482.peg.2276 | R005516 | (gi:118462431) lpqH (MAV 0306) - lipoprotein LpqH [Mycobacterium avium str. 104]                                        | 78.1  | 103 | 106 |
| fig 6666666.28482.peg.2276 | R018905 | (gi:253800810) lpqH (TBMG 03808) - 19 kDa lipoprotein antigen precursor lpqH [Mycobacterium tuberculosis str. KZN 1435] | 75    | 106 | 106 |
| fig 6666666.28482.peg.2276 | R005510 | (gi:15610899) lpqH (Rv3763) - 19 KDA LIPOPROTEIN ANTIGEN PRECURSOR LPQH [Mycobacterium tuberculosis str. H37Rv]         | 75    | 106 | 106 |
| fig 6666666.28482.peg.2276 | R005511 | (gi:148663629) lpqH (MRA 3801) - lipoprotein LpqH [Mycobacterium tuberculosis str. H37Ra]                               | 75    | 106 | 106 |
| fig 6666666.28482.peg.2276 | R013431 | (gi:148824968) lpqH (TBFG 13795) - 19 kda lipoprotein antigen precursor lpqH [Mycobacterium tuberculosis str. F11]      | 75    | 106 | 106 |
| fig 6666666.28482.peg.2276 | R018904 | (gi:340628734) lpqH (MCAN 37831) - 19 KDA lipoprotein antigen LPQH [Mycobacterium canettii str. CIPT 140010059]         | 75    | 106 | 106 |
| fig 6666666.28482.peg.2276 | R018906 | (gi:224992173) lpqH (JTY 3824) - 19 kDa lipoprotein antigen precursor [Mycobacterium bovis str. BCG str. Tokyo 172]     | 75    | 106 | 106 |

|                            |         |                                                                                                                          |       |     |     |
|----------------------------|---------|--------------------------------------------------------------------------------------------------------------------------|-------|-----|-----|
| fig 6666666.28482.peg.2276 | R005514 | (gi:121639677) lpqH (BCG 3822) - 19 kDa lipoprotein antigen precursor lpqH [Mycobacterium bovis str. BCG Pasteur 1173P2] | 75    | 106 | 106 |
| fig 6666666.28482.peg.2276 | R005513 | (gi:31794933) lpqH (Mb3789) - 19 KDA LIPOPROTEIN ANTIGEN PRECURSOR LPQH [Mycobacterium bovis str. AF2122/97]             | 75    | 106 | 106 |
| fig 6666666.28482.peg.2276 | R018903 | (gi:339633757) lpqH (MAF 37760) - 19 KDa lipoprotein antigen precursor Lpq [Mycobacterium africanum str. GM041182]       | 75    | 106 | 106 |
| fig 6666666.28482.peg.2276 | R005518 | (gi:118619526) lpqH (MUL 4389) - 19 kDa lipoprotein antigen precursor LpqH [Mycobacterium ulcerans str. Agy99]           | 75.24 | 103 | 106 |
| fig 6666666.28482.peg.2276 | R005512 | (gi:15843383) lpqH (MT3870) - lipoprotein [Mycobacterium tuberculosis str. CDC1551]                                      | 74.07 | 106 | 106 |
| fig 6666666.28482.peg.2276 | R018900 | (gi:183985283) lpqH (MMAR 5315) - 19 kDa lipoprotein antigen precursor LpqH [Mycobacterium marinum str. M]               | 75.51 | 96  | 106 |
| fig 6666666.28482.peg.2276 | R005520 | (gi:145221818) lpqH (Mflv 1226) - lipoprotein antigen family protein [Mycobacterium gilvum str. PYR-GCK]                 | 64.49 | 105 | 106 |
| fig 6666666.28482.peg.2276 | R005524 | (gi:108801913) lpqH (Mmcs 4950) - Mycobacterium 19 kDa lipoprotein antigen [Mycobacterium sp. str. MCS]                  | 60.75 | 105 | 106 |
| fig 6666666.28482.peg.2276 | R005523 | (gi:119871065) lpqH (Mkms 5038) - Mycobacterium 19 kDa lipoprotein antigen family protein [Mycobacterium sp. str. KMS]   | 60.75 | 105 | 106 |
| fig 6666666.28482.peg.2276 | R005522 | (gi:126437894) lpqH (Mjls 5331) - lipoprotein antigen family protein [Mycobacterium sp. str. JLS]                        | 60.75 | 105 | 106 |
| fig 6666666.28482.peg.2411 | R006727 | (gi:118466088) mce5F (MAV 2383) - mce related protein [Mycobacterium avium str. 104]                                     | 88.19 | 415 | 416 |
| fig 6666666.28482.peg.2411 | R006726 | (gi:41407954) mce5F (MAP1856) - hypothetical protein [Mycobacterium avium str. K-10 (subsp. paratuberculosis)]           | 88.19 | 415 | 416 |
| fig 6666666.28482.peg.2411 | R019468 | (gi:183983844) mce5F (MMAR 3869) - Mce family protein Mce5F [Mycobacterium marinum str. M]                               | 82.45 | 416 | 416 |
| fig 6666666.28482.peg.2411 | R006728 | (gi:118619040) mce5F (MUL 3801) - Mce family protein Mce5F [Mycobacterium ulcerans str. Agy99]                           | 81.97 | 416 | 416 |
| fig 6666666.28482.peg.2411 | R006731 | (gi:120401979) mce5F (Mvan 0964) - Mammalian cell entry related domain protein [Mycobacterium vanbaalenii str. PYR-1]    | 68.99 | 416 | 416 |
| fig 6666666.28482.peg.2411 | R019469 | (gi:169628100) mce5F (MAB 1005c) - putative MCE family protein [Mycobacterium abscessus str. ATCC 19977]                 | 68.59 | 416 | 416 |

|                            |         |                                                                                                                       |       |     |     |
|----------------------------|---------|-----------------------------------------------------------------------------------------------------------------------|-------|-----|-----|
| fig 6666666.28482.peg.2411 | R006730 | (gi:145220611) mce5F (Mflv 0005) - virulence factor Mce family protein [Mycobacterium gilvum str. PYR-GCK]            | 69.71 | 416 | 416 |
| fig 6666666.28482.peg.2411 | R006843 | (gi:118463870) mce9F (MAV 0107) - mce related protein [Mycobacterium avium str. 104]                                  | 64.18 | 416 | 416 |
| fig 6666666.28482.peg.2411 | R006842 | (gi:41406211) mce9F (MAP0113) - hypothetical protein [Mycobacterium avium str. K-10 (subsp. paratuberculosis)]        | 63.94 | 416 | 416 |
| fig 6666666.28482.peg.2411 | R006729 | (gi:118471128) mce5F (MSMEG 1148) - mce related protein [Mycobacterium smegmatis str. MC2 155]                        | 66.27 | 416 | 416 |
| fig 6666666.28482.peg.2411 | R019470 | (gi:333988775) mce5F (JDM601 0135) - Mce family protein Mce5F [Mycobacterium sp. str. JDM601]                         | 63.7  | 416 | 416 |
| fig 6666666.28482.peg.2411 | R006737 | (gi:118619940) mce6F (MUL 4914) - MCE-family protein Mce6F [Mycobacterium ulcerans str. Agy99]                        | 66.58 | 398 | 416 |
| fig 6666666.28482.peg.2411 | R019481 | (gi:183980216) mce6F (MMAR 0182) - MCE-family protein Mce6F [Mycobacterium marinum str. M]                            | 66.33 | 398 | 416 |
| fig 6666666.28482.peg.2411 | R019482 | (gi:169628790) mce6F (MAB 1700) - putative Mce family protein [Mycobacterium abscessus str. ATCC 19977]               | 64.82 | 398 | 416 |
| fig 6666666.28482.peg.2412 | R006720 | (gi:41407953) mce5E (MAP1855) - hypothetical protein [Mycobacterium avium str. K-10 (subsp. paratuberculosis)]        | 84.86 | 370 | 402 |
| fig 6666666.28482.peg.2412 | R006721 | (gi:118464806) mce5E (MAV 2384) - mce related protein [Mycobacterium avium str. 104]                                  | 84.59 | 370 | 402 |
| fig 6666666.28482.peg.2412 | R019465 | (gi:183983843) mce5E (MMAR 3868) - Mce family protein, Mce5E [Mycobacterium marinum str. M]                           | 76.04 | 384 | 402 |
| fig 6666666.28482.peg.2412 | R006722 | (gi:118619039) mce5E (MUL 3800) - Mce family protein, Mce5E [Mycobacterium ulcerans str. Agy99]                       | 75.26 | 384 | 402 |
| fig 6666666.28482.peg.2412 | R006724 | (gi:145220612) mce5E (Mflv 0006) - Mammalian cell entry related domain protein [Mycobacterium gilvum str. PYR-GCK]    | 65.37 | 384 | 402 |
| fig 6666666.28482.peg.2412 | R006723 | (gi:118472982) mce5E (MSMEG 1147) - mce related protein [Mycobacterium smegmatis str. MC2 155]                        | 66.93 | 378 | 402 |
| fig 6666666.28482.peg.2412 | R006725 | (gi:120401978) mce5E (Mvan 0963) - Mammalian cell entry related domain protein [Mycobacterium vanbaalenii str. PYR-1] | 64.63 | 376 | 402 |
| fig 6666666.28482.peg.2412 | R019466 | (gi:169628101) mce5E (MAB 1006c) - putative MCE family protein [Mycobacterium abscessus str. ATCC 19977]              | 64.77 | 369 | 402 |

|                            |         |                                                                                                                |       |     |     |
|----------------------------|---------|----------------------------------------------------------------------------------------------------------------|-------|-----|-----|
| fig 6666666.28482.peg.2412 | R019467 | (gi:333988776) mce5E (JDM601 0136) - Mce family protein Mce5E [Mycobacterium sp. str. JDM601]                  | 64.97 | 354 | 402 |
| fig 6666666.28482.peg.2412 | R006840 | (gi:41406210) mce9E (MAP0112) - hypothetical protein [Mycobacterium avium str. K-10 (subsp. paratuberculosis)] | 63.2  | 367 | 402 |
| fig 6666666.28482.peg.2412 | R006841 | (gi:118464466) mce9E (MAV 0106) - mce related protein [Mycobacterium avium str. 104]                           | 62.93 | 367 | 402 |
| fig 6666666.28482.peg.2412 | R019480 | (gi:169628789) mce6E (MAB 1699) - putative Mce family protein [Mycobacterium abscessus str. ATCC 19977]        | 61.34 | 357 | 402 |
| fig 6666666.28482.peg.2413 | R006716 | (gi:118464427) mce5D (MAV 2385) - virulence factor Mce family protein [Mycobacterium avium str. 104]           | 81.25 | 368 | 373 |
| fig 6666666.28482.peg.2413 | R006715 | (gi:41407952) mce5D (MAP1854) - hypothetical protein [Mycobacterium avium str. K-10 (subsp. paratuberculosis)] | 80.98 | 368 | 373 |
| fig 6666666.28482.peg.2413 | R019462 | (gi:183983842) mce5D (MMAR 3867) - MCE-family protein Mce5D [Mycobacterium marinum str. M]                     | 80.06 | 346 | 373 |
| fig 6666666.28482.peg.2413 | R019463 | (gi:169628102) mce5D (MAB 1007c) - putative MCE family protein [Mycobacterium abscessus str. ATCC 19977]       | 68.99 | 345 | 373 |
| fig 6666666.28482.peg.2413 | R006718 | (gi:145220613) mce5D (Mflv 0007) - virulence factor Mce family protein [Mycobacterium gilvum str. PYR-GCK]     | 65.62 | 348 | 373 |
| fig 6666666.28482.peg.2413 | R019477 | (gi:183980214) mce6D (MMAR 0180) - MCE-family protein Mce6D [Mycobacterium marinum str. M]                     | 65.99 | 347 | 373 |
| fig 6666666.28482.peg.2413 | R006735 | (gi:118619942) mce6D (MUL 4916) - MCE-family protein Mce6D [Mycobacterium ulcerans str. Agy99]                 | 65.71 | 347 | 373 |
| fig 6666666.28482.peg.2413 | R019478 | (gi:169628788) mce6D (MAB 1698) - putative Mce family protein [Mycobacterium abscessus str. ATCC 19977]        | 65.22 | 345 | 373 |
| fig 6666666.28482.peg.2413 | R006719 | (gi:120401977) mce5D (Mvan 0962) - virulence factor Mce family protein [Mycobacterium vanbaalenii str. PYR-1]  | 64.66 | 347 | 373 |
| fig 6666666.28482.peg.2413 | R006838 | (gi:41406209) mce9D (MAP0111) - hypothetical protein [Mycobacterium avium str. K-10 (subsp. paratuberculosis)] | 62.93 | 348 | 373 |
| fig 6666666.28482.peg.2413 | R006839 | (gi:118462753) mce9D (MAV 0105) - virulence factor Mce family protein [Mycobacterium avium str. 104]           | 62.93 | 348 | 373 |
| fig 6666666.28482.peg.2413 | R006717 | (gi:118468242) mce5D (MSMEG 1146) - virulence factor Mce family protein [Mycobacterium smegmatis str. MC2 155] | 63.19 | 344 | 373 |



|                            |         |                                                                                                                   |       |     |     |
|----------------------------|---------|-------------------------------------------------------------------------------------------------------------------|-------|-----|-----|
| fig 6666666.28482.peg.2413 | R019464 | (gi:333988777) mce5D (JDM601 0137) - MCE-family protein Mce5D<br>[Mycobacterium sp. str. JDM601]                  | 61.85 | 366 | 373 |
| fig 6666666.28482.peg.2414 | R006709 | (gi:41407951) mce5C (MAP1853) - hypothetical protein [Mycobacterium avium str. K-10 (subsp. paratuberculosis)]    | 85.19 | 351 | 351 |
| fig 6666666.28482.peg.2414 | R006710 | (gi:118463686) mce5C (MAV 2386) - virulence factor Mce family protein<br>[Mycobacterium avium str. 104]           | 85.84 | 346 | 351 |
| fig 6666666.28482.peg.2414 | R019459 | (gi:183983841) mce5C (MMAR 3866) - Mce family protein, Mce5C [Mycobacterium marinum str. M]                       | 76.14 | 351 | 351 |
| fig 6666666.28482.peg.2414 | R006711 | (gi:118619038) mce5C (MUL 3798) - Mce family protein, Mce5C [Mycobacterium ulcerans str. Agy99]                   | 75.85 | 351 | 351 |
| fig 6666666.28482.peg.2414 | R019460 | (gi:169628103) mce5C (MAB 1008c) - putative MCE family protein [Mycobacterium abscessus str. ATCC 19977]          | 67.06 | 343 | 351 |
| fig 6666666.28482.peg.2414 | R006712 | (gi:118469321) mce5C (MSMEG 1145) - virulence factor Mce family protein<br>[Mycobacterium smegmatis str. MC2 155] | 63.99 | 336 | 351 |
| fig 6666666.28482.peg.2414 | R006714 | (gi:120401976) mce5C (Mvan 0961) - virulence factor Mce family protein<br>[Mycobacterium vanbaalenii str. PYR-1]  | 62.65 | 340 | 351 |
| fig 6666666.28482.peg.2414 | R006837 | (gi:118464334) mce9C (MAV 0104) - virulence factor Mce family protein<br>[Mycobacterium avium str. 104]           | 62.68 | 351 | 351 |
| fig 6666666.28482.peg.2414 | R006836 | (gi:41406208) mce9C (MAP0110) - hypothetical protein [Mycobacterium avium str. K-10 (subsp. paratuberculosis)]    | 62.68 | 351 | 351 |
| fig 6666666.28482.peg.2414 | R019475 | (gi:183980213) mce6C (MMAR 0179) - MCE-family protein Mce6C [Mycobacterium marinum str. M]                        | 60.3  | 335 | 351 |
| fig 6666666.28482.peg.2414 | R006713 | (gi:145220614) mce5C (Mflv 0008) - virulence factor Mce family protein<br>[Mycobacterium gilvum str. PYR-GCK]     | 62.76 | 341 | 351 |
| fig 6666666.28482.peg.2414 | R019461 | (gi:333988778) mce5C (JDM601 0138) - Mce family protein Mce5C [Mycobacterium sp. str. JDM601]                     | 61.11 | 342 | 351 |
| fig 6666666.28482.peg.2415 | R006703 | (gi:41407950) mce5B (MAP1852) - hypothetical protein [Mycobacterium avium str. K-10 (subsp. paratuberculosis)]    | 82.91 | 351 | 353 |
| fig 6666666.28482.peg.2415 | R006704 | (gi:118463303) mce5B (MAV 2387) - virulence factor Mce family protein<br>[Mycobacterium avium str. 104]           | 82.62 | 351 | 353 |
| fig 6666666.28482.peg.2415 | R019456 | (gi:183983840) mce5B (MMAR 3865) - Mce family protein, Mce5B [Mycobacterium marinum str. M]                       | 79.77 | 351 | 353 |

|                            |         |                                                                                                                |       |     |     |
|----------------------------|---------|----------------------------------------------------------------------------------------------------------------|-------|-----|-----|
| fig 6666666.28482.peg.2415 | R006705 | (gi:118619037) mce5B (MUL 3797) - Mce family protein, Mce5B [Mycobacterium ulcerans str. Agy99]                | 79.49 | 351 | 353 |
| fig 6666666.28482.peg.2415 | R019457 | (gi:169628104) mce5B (MAB 1009c) - putative MCE family protein [Mycobacterium abscessus str. ATCC 19977]       | 69.6  | 351 | 353 |
| fig 6666666.28482.peg.2415 | R006707 | (gi:145220615) mce5B (Mflv 0009) - virulence factor Mce family protein [Mycobacterium gilvum str. PYR-GCK]     | 67.81 | 351 | 353 |
| fig 6666666.28482.peg.2415 | R006706 | (gi:118472058) mce5B (MSMEG 1144) - virulence factor Mce family protein [Mycobacterium smegmatis str. MC2 155] | 66.67 | 351 | 353 |
| fig 6666666.28482.peg.2415 | R006708 | (gi:120401975) mce5B (Mvan 0960) - virulence factor Mce family protein [Mycobacterium vanbaalenii str. PYR-1]  | 66.1  | 351 | 353 |
| fig 6666666.28482.peg.2415 | R006834 | (gi:41406207) mce9B (MAP0109) - Mce1B [Mycobacterium avium str. K-10 (subsp. paratuberculosis)]                | 61.84 | 351 | 353 |
| fig 6666666.28482.peg.2415 | R006835 | (gi:118463822) mce9B (MAV 0103) - virulence factor Mce family protein [Mycobacterium avium str. 104]           | 61.9  | 349 | 353 |
| fig 6666666.28482.peg.2415 | R019458 | (gi:333988779) mce5B (JDM601 0139) - Mce family protein Mce5B [Mycobacterium sp. str. JDM601]                  | 63.79 | 338 | 353 |
| fig 6666666.28482.peg.2415 | R019473 | (gi:183980212) mce6B (MMAR 0178) - MCE-family protein Mce6B [Mycobacterium marinum str. M]                     | 60.63 | 348 | 353 |
| fig 6666666.28482.peg.2415 | R019474 | (gi:169628786) mce6B (MAB 1696) - putative Mce family protein [Mycobacterium abscessus str. ATCC 19977]        | 60.34 | 348 | 353 |
| fig 6666666.28482.peg.2415 | R006733 | (gi:118619944) mce6B (MUL 4918) - MCE-family protein Mce6B [Mycobacterium ulcerans str. Agy99]                 | 60.53 | 342 | 353 |
| fig 6666666.28482.peg.2416 | R006697 | (gi:41407949) mce5A (MAP1851) - hypothetical protein [Mycobacterium avium str. K-10 (subsp. paratuberculosis)] | 87.98 | 516 | 526 |
| fig 6666666.28482.peg.2416 | R006698 | (gi:118466346) mce5A (MAV 2388) - mce related protein [Mycobacterium avium str. 104]                           | 87.79 | 516 | 526 |
| fig 6666666.28482.peg.2416 | R019453 | (gi:183983839) mce5A (MMAR 3864) - Mce protein, Mce5A [Mycobacterium marinum str. M]                           | 71.43 | 514 | 526 |
| fig 6666666.28482.peg.2416 | R006699 | (gi:118619036) mce5A (MUL 3796) - Mce protein, Mce5A [Mycobacterium ulcerans str. Agy99]                       | 71.04 | 514 | 526 |
| fig 6666666.28482.peg.2416 | R006700 | (gi:118472932) mce5A (MSMEG 1143) - mce related protein [Mycobacterium smegmatis str. MC2 155]                 | 64.38 | 523 | 526 |

|                            |         |                                                                                                                       |       |      |      |
|----------------------------|---------|-----------------------------------------------------------------------------------------------------------------------|-------|------|------|
| fig 6666666.28482.peg.2416 | R006833 | (gi:118465369) mce9A (MAV 0102) - mce related protein [Mycobacterium avium str. 104]                                  | 63.84 | 526  | 526  |
| fig 6666666.28482.peg.2416 | R006702 | (gi:120401974) mce5A (Mvan 0959) - Mammalian cell entry related domain protein [Mycobacterium vanbaalenii str. PYR-1] | 63.95 | 515  | 526  |
| fig 6666666.28482.peg.2416 | R019454 | (gi:169631642) mce5A (MAB 4568c) - putative Mce family protein [Mycobacterium abscessus str. ATCC 19977]              | 62.91 | 510  | 526  |
| fig 6666666.28482.peg.2416 | R019472 | (gi:169628785) mce6A (MAB 1695) - putative Mce family protein [Mycobacterium abscessus str. ATCC 19977]               | 61.11 | 522  | 526  |
| fig 6666666.28482.peg.2416 | R019455 | (gi:333988780) mce5A (JDM601 0140) - Mce family protein Mce5A [Mycobacterium sp. str. JDM601]                         | 62.79 | 514  | 526  |
| fig 6666666.28482.peg.2416 | R006832 | (gi:41406206) mce9A (MAP0108) - hypothetical protein [Mycobacterium avium str. K-10 (subsp. paratuberculosis)]        | 63.81 | 509  | 526  |
| fig 6666666.28482.peg.2416 | R006701 | (gi:145220616) mce5A (Mflv 0010) - Mammalian cell entry related domain protein [Mycobacterium gilvum str. PYR-GCK]    | 68.52 | 413  | 526  |
| fig 6666666.28482.peg.2432 | R018858 | (gi:253800873) pks2 (TBMG 03872) - polyketide synthase pks2 [Mycobacterium tuberculosis str. KZN 1435]                | 68.96 | 2077 | 2088 |
| fig 6666666.28482.peg.2432 | R005394 | (gi:15610961) pks2 (Rv3825c) - PROBABLE POLYKETIDE SYNTHASE PKS2 [Mycobacterium tuberculosis str. H37Rv]              | 68.96 | 2077 | 2088 |
| fig 6666666.28482.peg.2432 | R005395 | (gi:148663693) pks2 (MRA 3865) - polyketide synthase Pks2 [Mycobacterium tuberculosis str. H37Ra]                     | 68.96 | 2077 | 2088 |
| fig 6666666.28482.peg.2432 | R005396 | (gi:15843449) pks2 (MT3933) - mycocerosic acid synthase [Mycobacterium tuberculosis str. CDC1551]                     | 68.96 | 2077 | 2088 |
| fig 6666666.28482.peg.2432 | R005397 | (gi:31794999) pks2 (Mb3855c) - POLYKETIDE SYNTHASE PKS2 [Mycobacterium bovis str. AF2122/97]                          | 68.96 | 2077 | 2088 |
| fig 6666666.28482.peg.2432 | R018856 | (gi:339633820) pks2 (MAF 38400) - putative polyketide synthase PKS2 [Mycobacterium africanum str. GM041182]           | 68.96 | 2077 | 2088 |
| fig 6666666.28482.peg.2432 | R013422 | (gi:148825032) pks2 (TBFG 13859) - polyketide synthase pks2 [Mycobacterium tuberculosis str. F11]                     | 68.96 | 2077 | 2088 |
| fig 6666666.28482.peg.2432 | R018859 | (gi:224992238) pks2 (JTY 3890) - polyketide synthase [Mycobacterium bovis str. BCG str. Tokyo 172]                    | 68.91 | 2077 | 2088 |
| fig 6666666.28482.peg.2432 | R005398 | (gi:121639743) pks2 (BCG 3888c) - Polyketide synthase pks2 [Mycobacterium bovis str. BCG Pasteur 1173P2]              | 68.91 | 2077 | 2088 |

|                            |         |                                                                                                                                                           |       |      |      |
|----------------------------|---------|-----------------------------------------------------------------------------------------------------------------------------------------------------------|-------|------|------|
| fig 6666666.28482.peg.2432 | R018857 | (gi:340628794) pks2 (MCAN 38441) - putative polyketide synthase PKS2 [Mycobacterium canettii str. CIPT 140010059]                                         | 68.96 | 2077 | 2088 |
| fig 6666666.28482.peg.2432 | R005400 | (gi:118465538) pks2 (MAV 2370) - mycocerosic acid synthase [Mycobacterium avium str. 104]                                                                 | 68.56 | 2086 | 2088 |
| fig 6666666.28482.peg.2432 | R005399 | (gi:41409862) pks2 (MAP3764c) - Pks2 [Mycobacterium avium str. K-10 (subsp. paratuberculosis)]                                                            | 67.6  | 2078 | 2088 |
| fig 6666666.28482.peg.2432 | R005402 | (gi:108800085) pks2 (Mmcs 3119) - acyl transferase region [Mycobacterium sp. str. MCS]                                                                    | 65.79 | 2079 | 2088 |
| fig 6666666.28482.peg.2432 | R005401 | (gi:119869211) pks2 (Mkms 3179) - acyl transferase domain protein [Mycobacterium sp. str. KMS]                                                            | 65.79 | 2079 | 2088 |
| fig 6666666.28482.peg.2432 | R018783 | (gi:183981780) mas (MMAR 1767) - multifunctional mycocerosic acid synthase membrane-associated Mas [Mycobacterium marinum str. M]                         | 66.54 | 2087 | 2088 |
| fig 6666666.28482.peg.2432 | R018785 | (gi:340627931) mas (MCAN 29621) - putative multifunctional mycocerosic acid synthase membrane-associated MAS [Mycobacterium canettii str. CIPT 140010059] | 65.19 | 2078 | 2088 |
| fig 6666666.28482.peg.2432 | R018786 | (gi:253797972) mas (TBMG 01032) - multifunctional mycocerosic acid synthase membrane-associated mas [Mycobacterium tuberculosis str. KZN 1435]            | 65.14 | 2078 | 2088 |
| fig 6666666.28482.peg.2432 | R005270 | (gi:15610077) mas (Rv2940c) - PROBABLE MULTIFUNCTIONAL MYCOCEROSIC ACID SYNTHASE MEMBRANE-ASSOCIATED MAS [Mycobacterium tuberculosis str. H37Rv]          | 65.14 | 2078 | 2088 |
| fig 6666666.28482.peg.2432 | R005271 | (gi:148662786) mas (MRA 2966) - multifunctional mycocerosic acid synthase membrane-associated Mas [Mycobacterium tuberculosis str. H37Ra]                 | 65.14 | 2078 | 2088 |
| fig 6666666.28482.peg.2432 | R013408 | (gi:148824129) mas (TBFG 12954) - multi-functional membrane-associated mycocerosic acid synthase mas [Mycobacterium tuberculosis str. F11]                | 65.14 | 2078 | 2088 |
| fig 6666666.28482.peg.2432 | R005272 | (gi:15842486) mas (MT3010) - mycocerosic acid synthase [Mycobacterium tuberculosis str. CDC1551]                                                          | 65.14 | 2078 | 2088 |
| fig 6666666.28482.peg.2432 | R018784 | (gi:339632947) mas (MAF 29450) - putative multifunctional mycocerosic acid synthase membrane-associated MAS [Mycobacterium africanum str. GM041182]       | 65.05 | 2078 | 2088 |

|                            |         |                                                                                                                                                           |       |      |      |
|----------------------------|---------|-----------------------------------------------------------------------------------------------------------------------------------------------------------|-------|------|------|
| fig 6666666.28482.peg.2432 | R018787 | (gi:224991314) mas (JTY 2957) - putative multifunctional mycocerosic acid synthase membrane-associated [Mycobacterium bovis str. BCG str. Tokyo 172]      | 65.1  | 2078 | 2088 |
| fig 6666666.28482.peg.2432 | R005274 | (gi:121638822) mas (BCG 2962c) - putative multifunctional mycocerosic acid synthase membrane-associated mas [Mycobacterium bovis str. BCG Pasteur 1173P2] | 65.1  | 2078 | 2088 |
| fig 6666666.28482.peg.2432 | R005273 | (gi:31794117) mas (Mb2965c) - PROBABLE MULTIFUNCTIONAL MYCOCEROSIC ACID SYNTHASE MEMBRANE-ASSOCIATED MAS [Mycobacterium bovis str. AF2122/97]             | 65.1  | 2078 | 2088 |
| fig 6666666.28482.peg.2432 | R005276 | (gi:118617588) mas (MUL 2010) - multifunctional mycocerosic acid synthase membrane-associated Mas [Mycobacterium ulcerans str. Agy99]                     | 66.44 | 2087 | 2088 |
| fig 6666666.28482.peg.2432 | R005275 | (gi:15826970) mas (ML0139) - putative mycocerosic synthase [Mycobacterium leprae str. TN]                                                                 | 63.83 | 2088 | 2088 |
| fig 6666666.28482.peg.2432 | R018788 | (gi:221229448) mas (MLBr 00139) - putative mycocerosic synthase [Mycobacterium leprae str. Br4923]                                                        | 63.83 | 2088 | 2088 |
| fig 6666666.28482.peg.2439 | R018735 | (gi:183981778) fadD28 (MMAR 1765) - acyl-CoA synthetase [Mycobacterium marinum str. M]                                                                    | 64.21 | 583  | 584  |
| fig 6666666.28482.peg.2439 | R005202 | (gi:118617586) fadD28 (MUL 2008) - fatty-acyl AMP ligase FadD28 [Mycobacterium ulcerans str. Agy99]                                                       | 63.87 | 583  | 584  |
| fig 6666666.28482.peg.2439 | R005199 | (gi:41409850) fadD28 (MAP3752) - acyl-CoA synthase [Mycobacterium avium str. K-10 (subsp. paratuberculosis)]                                              | 63.14 | 583  | 584  |
| fig 6666666.28482.peg.2439 | R005197 | (gi:31794118) fadD28 (Mb2966) - acyl-CoA synthase [Mycobacterium bovis str. AF2122/97]                                                                    | 63.93 | 584  | 584  |
| fig 6666666.28482.peg.2439 | R018738 | (gi:253797971) fadD28 (TBMG 01031) - acyl-CoA synthetase [Mycobacterium tuberculosis str. KZN 1435]                                                       | 63.93 | 584  | 584  |
| fig 6666666.28482.peg.2439 | R005194 | (gi:15610078) fadD28 (Rv2941) - acyl-CoA synthase [Mycobacterium tuberculosis str. H37Rv]                                                                 | 63.93 | 584  | 584  |
| fig 6666666.28482.peg.2439 | R005195 | (gi:148662787) fadD28 (MRA 2967) - fatty-acid-CoA ligase FadD28 [Mycobacterium tuberculosis str. H37Ra]                                                   | 63.93 | 584  | 584  |
| fig 6666666.28482.peg.2439 | R013401 | (gi:148824130) fadD28 (TBFG 12955) - fatty-acid-CoA ligase fadD28 [Mycobacterium tuberculosis str. F11]                                                   | 63.93 | 584  | 584  |
| fig 6666666.28482.peg.2439 | R005196 | (gi:15842487) fadD28 (MT3011) - acyl-CoA synthase [Mycobacterium tuberculosis str. CDC1551]                                                               | 63.93 | 584  | 584  |

|                            |         |                                                                                                                                      |       |     |     |
|----------------------------|---------|--------------------------------------------------------------------------------------------------------------------------------------|-------|-----|-----|
| fig 6666666.28482.peg.2439 | R018736 | (gi:339632948) fadD28 (MAF 29460) - fatty-acid-CoA ligase FADD28 (fatty-acid-CoA synthetase) [Mycobacterium africanum str. GM041182] | 63.93 | 584 | 584 |
| fig 6666666.28482.peg.2439 | R005201 | (gi:15826969) fadD28 (ML0138) - acyl-CoA synthase [Mycobacterium leprae str. TN]                                                     | 63.2  | 584 | 584 |
| fig 6666666.28482.peg.2439 | R018740 | (gi:221229447) fadD28 (MLBr 00138) - acyl-CoA synthetase [Mycobacterium leprae str. Br4923]                                          | 63.2  | 584 | 584 |
| fig 6666666.28482.peg.2439 | R018737 | (gi:340627932) fadD28 (MCAN 29631) - fatty-acid-CoA ligase FADD28 [Mycobacterium canettii str. CIPT 140010059]                       | 63.76 | 584 | 584 |
| fig 6666666.28482.peg.2439 | R018739 | (gi:224991315) fadD28 (JTY 2958) - acyl-CoA synthetase [Mycobacterium bovis str. BCG str. Tokyo 172]                                 | 63.93 | 584 | 584 |
| fig 6666666.28482.peg.2439 | R005198 | (gi:121638823) fadD28 (BCG 2963) - fatty-acid-CoA ligase fadD28 [Mycobacterium bovis str. BCG Pasteur 1173P2]                        | 63.93 | 584 | 584 |
| fig 6666666.28482.peg.2453 | R005338 | (gi:41407332) MAP1234 - hypothetical protein [Mycobacterium avium str. K-10 (subsp. paratuberculosis)]                               | 70.76 | 234 | 257 |
| fig 6666666.28482.peg.2453 | R018821 | (gi:253797953) TBMG01014 - glycosyltransferase [Mycobacterium tuberculosis str. KZN 1435]                                            | 72.48 | 217 | 257 |
| fig 6666666.28482.peg.2453 | R005333 | (gi:15610094) Rv2957 - POSSIBLE GLYCOSYL TRANSFERASE [Mycobacterium tuberculosis str. H37Rv]                                         | 72.48 | 217 | 257 |
| fig 6666666.28482.peg.2453 | R005334 | (gi:148662804) MRA2984 - glycosyl transferase [Mycobacterium tuberculosis str. H37Ra]                                                | 72.48 | 217 | 257 |
| fig 6666666.28482.peg.2453 | R013414 | (gi:148824146) TBF12971 - hypothetical glycosyl transferase [Mycobacterium tuberculosis str. F11]                                    | 72.48 | 217 | 257 |
| fig 6666666.28482.peg.2453 | R018820 | (gi:340627946) MCAN29771 - putative GLYCOSYL transferase [Mycobacterium canettii str. CIPT 140010059]                                | 72.48 | 217 | 257 |
| fig 6666666.28482.peg.2453 | R018822 | (gi:224991330) JTY2973 - putative glycosyl transferase [Mycobacterium bovis str. BCG str. Tokyo 172]                                 | 72.48 | 217 | 257 |
| fig 6666666.28482.peg.2453 | R005337 | (gi:121638838) BCG2978 - putative glycosyl transferase [Mycobacterium bovis str. BCG Pasteur 1173P2]                                 | 72.48 | 217 | 257 |
| fig 6666666.28482.peg.2453 | R005336 | (gi:31794133) Mb2981 - POSSIBLE GLYCOSYL TRANSFERASE [Mycobacterium bovis str. AF2122/97]                                            | 72.48 | 217 | 257 |
| fig 6666666.28482.peg.2453 | R018819 | (gi:339632964) MAF29620 - putative glycosyl transferase [Mycobacterium africanum str. GM041182]                                      | 72.48 | 217 | 257 |

|                            |         |                                                                                                               |       |     |     |
|----------------------------|---------|---------------------------------------------------------------------------------------------------------------|-------|-----|-----|
| fig 6666666.28482.peg.2453 | R005335 | (gi:15842506) MT3031 - glycosyl transferase [Mycobacterium tuberculosis str. CDC1551]                         | 72.48 | 217 | 257 |
| fig 6666666.28482.peg.2453 | R005339 | (gi:118467159) MAV3253 - hypothetical protein [Mycobacterium avium str. 104]                                  | 69.62 | 156 | 257 |
| fig 6666666.28482.peg.2533 | R018887 | (gi:169631477) hspX (MAB 4402) - heat shock protein Hsp20 [Mycobacterium abscessus str. ATCC 19977]           | 62.59 | 145 | 146 |
| fig 6666666.28482.peg.2590 | R005681 | (gi:15843099) lipF (MT3591) - esterase [Mycobacterium tuberculosis str. CDC1551]                              | 71.43 | 294 | 295 |
| fig 6666666.28482.peg.2590 | R018937 | (gi:340628455) lipF (MCAN 35011) - putative esterase/lipase LIPF [Mycobacterium canettii str. CIPT 140010059] | 73.6  | 250 | 295 |
| fig 6666666.28482.peg.2590 | R018938 | (gi:253800530) lipF (TBMG 03533) - esterase/lipase lipF [Mycobacterium tuberculosis str. KZN 1435]            | 73.6  | 250 | 295 |
| fig 6666666.28482.peg.2590 | R005679 | (gi:15610623) lipF (Rv3487c) - PROBABLE ESTERASE/LIPASE LIPF [Mycobacterium tuberculosis str. H37Rv]          | 73.6  | 250 | 295 |
| fig 6666666.28482.peg.2590 | R005680 | (gi:148663351) lipF (MRA 3527) - esterase LipF [Mycobacterium tuberculosis str. H37Ra]                        | 73.6  | 250 | 295 |
| fig 6666666.28482.peg.2590 | R013445 | (gi:148824695) lipF (TBFG 13522) - esterase/lipase lipF [Mycobacterium tuberculosis str. F11]                 | 73.6  | 250 | 295 |
| fig 6666666.28482.peg.2590 | R018939 | (gi:224991902) lipF (JTY 3551) - putative esterase/lipase [Mycobacterium bovis str. BCG str. Tokyo 172]       | 73.6  | 250 | 295 |
| fig 6666666.28482.peg.2590 | R005683 | (gi:121639406) lipF (BCG 3551c) - putative esterase/lipase lipF [Mycobacterium bovis str. BCG Pasteur 1173P2] | 73.6  | 250 | 295 |
| fig 6666666.28482.peg.2590 | R005682 | (gi:31794663) lipF (Mb3517c) - PROBABLE ESTERASE/LIPASE LIPF [Mycobacterium bovis str. AF2122/97]             | 73.6  | 250 | 295 |
| fig 6666666.28482.peg.2590 | R018936 | (gi:339633490) lipF (MAF 35000) - putative esterase/lipase LIPF [Mycobacterium africanum str. GM041182]       | 73.6  | 250 | 295 |
| fig 6666666.28482.peg.2628 | R006193 | (gi:41410371) whiB3 (MAP4273c) - WhiB3 [Mycobacterium avium str. K-10 (subsp. paratuberculosis)]              | 95.1  | 102 | 102 |
| fig 6666666.28482.peg.2628 | R019244 | (gi:183981153) whiB3 (MMAR 1132) - WhiB-like regulatory protein, WhiB3 [Mycobacterium marinum str. M]         | 94.12 | 102 | 102 |
| fig 6666666.28482.peg.2628 | R006196 | (gi:118616663) whiB3 (MUL 0895) - Whib-like regulatory protein, WhiB3 [Mycobacterium ulcerans str. Agy99]     | 93.14 | 102 | 102 |

|                            |         |                                                                                                                                     |       |     |     |
|----------------------------|---------|-------------------------------------------------------------------------------------------------------------------------------------|-------|-----|-----|
| fig 6666666.28482.peg.2628 | R019248 | (gi:253800463) whiB3 (TBMG 03467) - transcriptional regulator whib-like whiB3 [Mycobacterium tuberculosis str. KZN 1435]            | 91.18 | 102 | 102 |
| fig 6666666.28482.peg.2628 | R006188 | (gi:15610552) whiB3 (Rv3416) - TRANSCRIPTIONAL REGULATORY PROTEIN WHIB-LIKE WHIB3 [Mycobacterium tuberculosis str. H37Rv]           | 91.18 | 102 | 102 |
| fig 6666666.28482.peg.2628 | R006189 | (gi:148663280) whiB3 (MRA 3456) - transcriptional regulatory protein whib-like WhiB3 [Mycobacterium tuberculosis str. H37Ra]        | 91.18 | 102 | 102 |
| fig 6666666.28482.peg.2628 | R013502 | (gi:148824623) whiB3 (TBF3 13450) - transcriptional regulatory protein whib-like whiB3 [Mycobacterium tuberculosis str. F11]        | 91.18 | 102 | 102 |
| fig 6666666.28482.peg.2628 | R006190 | (gi:15843012) whiB3 (MT3525) - WhiB-related protein [Mycobacterium tuberculosis str. CDC1551]                                       | 91.18 | 102 | 102 |
| fig 6666666.28482.peg.2628 | R019247 | (gi:340628394) whiB3 (MCAN 34401) - transcriptional regulatory protein WHIB-like WHIB3 [Mycobacterium canettii str. CIPT 140010059] | 91.18 | 102 | 102 |
| fig 6666666.28482.peg.2628 | R019249 | (gi:224991837) whiB3 (JTY 3486) - transcriptional regulatory protein whiB-like [Mycobacterium bovis str. BCG str. Tokyo 172]        | 91.18 | 102 | 102 |
| fig 6666666.28482.peg.2628 | R006192 | (gi:121639341) whiB3 (BCG 3486) - Transcriptional regulatory protein whiB-like whib3 [Mycobacterium bovis str. BCG Pasteur 1173P2]  | 91.18 | 102 | 102 |
| fig 6666666.28482.peg.2628 | R006191 | (gi:31794597) whiB3 (Mb3450) - TRANSCRIPTIONAL REGULATORY PROTEIN WHIB-LIKE WHIB3 [Mycobacterium bovis str. AF2122/97]              | 91.18 | 102 | 102 |
| fig 6666666.28482.peg.2628 | R019246 | (gi:339633421) whiB3 (MAF 34300) - transcriptional regulatory protein WHIB-like WHIB3 [Mycobacterium africanum str. GM041182]       | 91.18 | 102 | 102 |
| fig 6666666.28482.peg.2628 | R006195 | (gi:15827111) whiB3 (ML0382) - putative transcriptional regulator [Mycobacterium leprae str. TN]                                    | 89.22 | 102 | 102 |
| fig 6666666.28482.peg.2628 | R019250 | (gi:221229589) whiB3 (MLBr 00382) - putative transcriptional regulator [Mycobacterium leprae str. Br4923]                           | 89.22 | 102 | 102 |
| fig 6666666.28482.peg.2628 | R006199 | (gi:120402515) whiB3 (Mvan 1506) - transcription factor WhiB [Mycobacterium vanbaalenii str. PYR-1]                                 | 82.35 | 102 | 102 |
| fig 6666666.28482.peg.2628 | R006202 | (gi:108798133) whiB3 (Mmcs 1162) - transcription factor WhiB [Mycobacterium sp. str. MCS]                                           | 82.35 | 102 | 102 |
| fig 6666666.28482.peg.2628 | R006201 | (gi:119867229) whiB3 (Mkms 1179) - transcription factor WhiB [Mycobacterium sp. str. KMS]                                           | 82.35 | 102 | 102 |
| fig 6666666.28482.peg.2628 | R006200 | (gi:126433792) whiB3 (Mjls 1189) - transcription factor WhiB [Mycobacterium sp. str. JLS]                                           | 82.35 | 102 | 102 |



|                            |         |                                                                                                                                        |       |     |     |
|----------------------------|---------|----------------------------------------------------------------------------------------------------------------------------------------|-------|-----|-----|
| fig 6666666.28482.peg.2628 | R006198 | (gi:145225490) whiB3 (Mflv 4914) - transcription factor WhiB [Mycobacterium gilvum str. PYR-GCK]                                       | 80.39 | 102 | 102 |
| fig 6666666.28482.peg.2628 | R006197 | (gi:118471283) whiB3 (MSMEG 1597) - Transcription factor WhiB [Mycobacterium smegmatis str. MC2 155]                                   | 81.37 | 102 | 102 |
| fig 6666666.28482.peg.2628 | R019245 | (gi:169630805) whiB3 (MAB 3726) - WhiB family transcriptional regulator [Mycobacterium abscessus str. ATCC 19977]                      | 71.57 | 102 | 102 |
| fig 6666666.28482.peg.2628 | R006194 | (gi:118462777) whiB3 (MAV 4361) - Transcription factor WhiB [Mycobacterium avium str. 104]                                             | 92.86 | 84  | 102 |
| fig 6666666.28482.peg.2793 | R019164 | (gi:169630604) narK2 (MAB 3523c) - integral membrane nitrite extrusion protein NarK3 [Mycobacterium abscessus str. ATCC 19977]         | 76.36 | 461 | 481 |
| fig 6666666.28482.peg.2804 | R006094 | (gi:118466410) sodC (MAV 4722) - superoxide dismutase, Cu-Zn [Mycobacterium avium str. 104]                                            | 72.77 | 235 | 235 |
| fig 6666666.28482.peg.2804 | R006093 | (gi:41410019) sodC (MAP3921) - SodC [Mycobacterium avium str. K-10 (subsp. paratuberculosis)]                                          | 72.77 | 235 | 235 |
| fig 6666666.28482.peg.2804 | R019187 | (gi:340625457) sodC (MCAN 04301) - putative periplasmic superoxide dismutase [Cu-Zn] SODC [Mycobacterium canettii str. CIPT 140010059] | 67.08 | 235 | 235 |
| fig 6666666.28482.peg.2804 | R019188 | (gi:253797356) sodC (TBMG 00433) - periplasmic superoxide dismutase [Cu-Zn] sodC [Mycobacterium tuberculosis str. KZN 1435]            | 66.67 | 235 | 235 |
| fig 6666666.28482.peg.2804 | R006088 | (gi:15607573) sodC (Rv0432) - PROBABLE PERIPLASMIC SUPEROXIDE DISMUTASE [CU-ZN] SODC [Mycobacterium tuberculosis str. H37Rv]           | 66.67 | 235 | 235 |
| fig 6666666.28482.peg.2804 | R006089 | (gi:148660197) sodC (MRA 0437) - superoxide dismutase [Mycobacterium tuberculosis str. H37Ra]                                          | 66.67 | 235 | 235 |
| fig 6666666.28482.peg.2804 | R013480 | (gi:148821628) sodC (TBF3 10437) - periplasmic superoxide dismutase [Cu-Zn] sodC [Mycobacterium tuberculosis str. F11]                 | 66.67 | 235 | 235 |
| fig 6666666.28482.peg.2804 | R006090 | (gi:15839819) sodC (MT0447) - superoxide dismutase [Mycobacterium tuberculosis str. CDC1551]                                           | 66.67 | 235 | 235 |
| fig 6666666.28482.peg.2804 | R019189 | (gi:224988818) sodC (JTY 0441) - putative periplasmic Cu-Zn-superoxide dismutase [Mycobacterium bovis str. BCG str. Tokyo 172]         | 66.67 | 235 | 235 |
| fig 6666666.28482.peg.2804 | R006092 | (gi:121636346) sodC (BCG 0471) - putative periplasmic superoxide dismutase [Cu-Zn] sodC [Mycobacterium bovis str. BCG Pasteur 1173P2]  | 66.67 | 235 | 235 |
| fig 6666666.28482.peg.2804 | R006091 | (gi:31791610) sodC (Mb0440) - PROBABLE PERIPLASMIC SUPEROXIDE DISMUTASE [CU-ZN] SODC [Mycobacterium bovis str. AF2122/97]              | 66.67 | 235 | 235 |

|                            |         |                                                                                                                                  |       |     |     |
|----------------------------|---------|----------------------------------------------------------------------------------------------------------------------------------|-------|-----|-----|
| fig 6666666.28482.peg.2804 | R019186 | (gi:339630501) sodC (MAF 04340) - putative periplasmic superoxide dismutase [Cu-Zn] SODC [Mycobacterium africanum str. GM041182] | 66.67 | 235 | 235 |
| fig 6666666.28482.peg.2804 | R006095 | (gi:15828035) sodC (ML1925) - superoxide dismutase precursor (Cu-Zn) [Mycobacterium leprae str. TN]                              | 68.22 | 231 | 235 |
| fig 6666666.28482.peg.2804 | R019190 | (gi:221230512) sodC (MLBr 01925) - superoxide dismutase precursor (Cu-Zn) [Mycobacterium leprae str. Br4923]                     | 68.22 | 231 | 235 |
| fig 6666666.28482.peg.2804 | R006096 | (gi:118617063) sodC (MUL 1379) - periplasmic superoxide dismutase [Cu-Zn] SodC [Mycobacterium ulcerans str. Agy99]               | 68.44 | 235 | 235 |
| fig 6666666.28482.peg.2804 | R019184 | (gi:183980771) sodC (MMAR 0747) - periplasmic superoxide dismutase [Cu-Zn] SodC [Mycobacterium marinum str. M]                   | 68.03 | 235 | 235 |
| fig 6666666.28482.peg.2804 | R006097 | (gi:118473568) sodC (MSMEG 0835) - copper/zinc superoxide dismutase [Mycobacterium smegmatis str. MC2 155]                       | 63.6  | 223 | 235 |
| fig 6666666.28482.peg.2804 | R019191 | (gi:333989046) sodC (JDM601 0406) - periplasmic superoxide dismutase [Mycobacterium sp. str. JDM601]                             | 62.56 | 215 | 235 |
| fig 6666666.28482.peg.2804 | R006102 | (gi:108797552) sodC (Mmcs 0572) - superoxide dismutase, copper/zinc binding protein [Mycobacterium sp. str. MCS]                 | 61.4  | 223 | 235 |
| fig 6666666.28482.peg.2804 | R006101 | (gi:119866638) sodC (Mkms 0584) - superoxide dismutase, copper/zinc binding [Mycobacterium sp. str. KMS]                         | 61.4  | 223 | 235 |
| fig 6666666.28482.peg.2804 | R006100 | (gi:126433174) sodC (Mjls 0562) - superoxide dismutase, copper/zinc binding [Mycobacterium sp. str. JLS]                         | 61.4  | 223 | 235 |
| fig 6666666.28482.peg.2804 | R006099 | (gi:120401750) sodC (Mvan 0735) - superoxide dismutase, copper/zinc binding [Mycobacterium vanbaalenii str. PYR-1]               | 60.85 | 231 | 235 |
| fig 6666666.28482.peg.2826 | R008500 | (gi:126697767) groEL (CD0194) - 60 kDa chaperonin [Clostridium difficile str. 630]                                               | 64.45 | 524 | 541 |
| fig 6666666.28482.peg.2826 | R008508 | (gi:125975373) groEL (Cthe 2892) - chaperonin GroEL [Clostridium thermocellum str. ATCC 27405]                                   | 63.5  | 524 | 541 |
| fig 6666666.28482.peg.2826 | R008501 | (gi:118444628) groEL (NT01CX 0462) - chaperonin GroEL [Clostridium novyi str. NT]                                                | 63.81 | 524 | 541 |
| fig 6666666.28482.peg.2826 | R008506 | (gi:15895960) groEL (CAC2703) - chaperonin GroEL [Clostridium acetobutylicum str. ATCC 824]                                      | 64.38 | 524 | 541 |
| fig 6666666.28482.peg.2826 | R008502 | (gi:18311271) groEL (CPE2289) - chaperonin GroEL [Clostridium perfringens str. 13]                                               | 61.21 | 540 | 541 |

|                            |         |                                                                                                              |       |     |     |
|----------------------------|---------|--------------------------------------------------------------------------------------------------------------|-------|-----|-----|
| fig 6666666.28482.peg.2826 | R008503 | (gi:110799227) groEL (CPF 2573) - chaperonin, 60 kDa [Clostridium perfringens str. ATCC 13124]               | 61.03 | 540 | 541 |
| fig 6666666.28482.peg.2826 | R015473 | (gi:170760184) groEL (CLK 2714) - chaperonin GroEL [Clostridium botulinum str. Loch Maree (serotype A3)]     | 61.67 | 539 | 541 |
| fig 6666666.28482.peg.2826 | R008507 | (gi:150015219) groEL (Cbei 0329) - chaperonin GroEL [Clostridium beijerinckii str. NCIMB 8052]               | 60.93 | 539 | 541 |
| fig 6666666.28482.peg.2826 | R008504 | (gi:28212000) groEL (CTC02413) - chaperonin GroEL [Clostridium tetani str. E88]                              | 60.93 | 539 | 541 |
| fig 6666666.28482.peg.2826 | R015474 | (gi:170756380) groEL (CLD 1225) - chaperonin GroEL [Clostridium botulinum str. Okra (serotype B1)]           | 61.48 | 539 | 541 |
| fig 6666666.28482.peg.2826 | R015476 | (gi:153941100) groEL (CLI 3468) - chaperonin GroEL [Clostridium botulinum str. Langeland (serotype F)]       | 61.48 | 539 | 541 |
| fig 6666666.28482.peg.2826 | R015472 | (gi:153935823) groEL (CLC 3240) - chaperonin GroEL [Clostridium botulinum str. Hall (serotype A)]            | 61.48 | 539 | 541 |
| fig 6666666.28482.peg.2826 | R008505 | (gi:148381241) groEL (CBO3298) - 60 kDa chaperonin GroEL [Clostridium botulinum str. ATCC 3502 (serotype A)] | 61.48 | 539 | 541 |
| fig 6666666.28482.peg.2826 | R015471 | (gi:153934242) groEL (CLB 3354) - chaperonin GroEL [Clostridium botulinum str. ATCC 19397 (serotype A)]      | 61.48 | 539 | 541 |
| fig 6666666.28482.peg.2857 | R018932 | (gi:253797394) icl (TBMG 00469) - isocitrate lyase icl [Mycobacterium tuberculosis str. KZN 1435]            | 95.56 | 428 | 428 |
| fig 6666666.28482.peg.2857 | R005664 | (gi:57116734) icl (Rv0467) - isocitrate lyase [Mycobacterium tuberculosis str. H37Rv]                        | 95.56 | 428 | 428 |
| fig 6666666.28482.peg.2857 | R005665 | (gi:148660233) icl (MRA 0473) - isocitrate lyase Icl [Mycobacterium tuberculosis str. H37Ra]                 | 95.56 | 428 | 428 |
| fig 6666666.28482.peg.2857 | R013444 | (gi:148821665) icl (TBFG 10474) - isocitrate lyase icl [Mycobacterium tuberculosis str. F11]                 | 95.56 | 428 | 428 |
| fig 6666666.28482.peg.2857 | R005666 | (gi:15839856) icl (MT0483) - isocitrate lyase [Mycobacterium tuberculosis str. CDC1551]                      | 95.56 | 428 | 428 |
| fig 6666666.28482.peg.2857 | R018931 | (gi:340625493) icl (MCAN 04661) - isocitrate lyase ICL [Mycobacterium canettii str. CIPT 140010059]          | 95.56 | 428 | 428 |
| fig 6666666.28482.peg.2857 | R018933 | (gi:224988854) icl (JTY 0477) - isocitrate lyase [Mycobacterium bovis str. BCG str. Tokyo 172]               | 95.56 | 428 | 428 |

|                            |         |                                                                                                                     |       |     |     |
|----------------------------|---------|---------------------------------------------------------------------------------------------------------------------|-------|-----|-----|
| fig 6666666.28482.peg.2857 | R005668 | (gi:121636382) icl (BCG 0507) - Isocitrate lyase icl [Mycobacterium bovis str. BCG Pasteur 1173P2]                  | 95.56 | 428 | 428 |
| fig 6666666.28482.peg.2857 | R005667 | (gi:31791646) icl (Mb0476) - isocitrate lyase [Mycobacterium bovis str. AF2122/97]                                  | 95.56 | 428 | 428 |
| fig 6666666.28482.peg.2857 | R018930 | (gi:339630536) icl (MAF 04700) - isocitrate lyase Icl [Mycobacterium africanum str. GM041182]                       | 95.56 | 428 | 428 |
| fig 6666666.28482.peg.2857 | R005670 | (gi:118462260) icl (MAV 4682) - isocitrate lyase [Mycobacterium avium str. 104]                                     | 93.69 | 428 | 428 |
| fig 6666666.28482.peg.2857 | R005669 | (gi:41410059) icl (MAP3961) - isocitrate lyase [Mycobacterium avium str. K-10 (subsp. paratuberculosis)]            | 93.44 | 427 | 428 |
| fig 6666666.28482.peg.2857 | R018935 | (gi:333989098) icl (JDM601 0458) - isocitrate lyase Icl [Mycobacterium sp. str. JDM601]                             | 92.76 | 428 | 428 |
| fig 6666666.28482.peg.2857 | R005673 | (gi:118471509) icl (MSMEG 0911) - isocitrate lyase [Mycobacterium smegmatis str. MC2 155]                           | 92.52 | 428 | 428 |
| fig 6666666.28482.peg.2857 | R005676 | (gi:126433240) icl (Mjls 0629) - isocitrate lyase [Mycobacterium sp. str. JLS]                                      | 92.52 | 428 | 428 |
| fig 6666666.28482.peg.2857 | R018928 | (gi:183980816) icl (MMAR 0792) - isocitrate lyase Icl [Mycobacterium marinum str. M]                                | 92.06 | 428 | 428 |
| fig 6666666.28482.peg.2857 | R005675 | (gi:120401816) icl (Mvan 0801) - isocitrate lyase [Mycobacterium vanbaalenii str. PYR-1]                            | 92.06 | 428 | 428 |
| fig 6666666.28482.peg.2857 | R005674 | (gi:145220712) icl (Mflv 0107) - isocitrate lyase [Mycobacterium gilvum str. PYR-GCK]                               | 91.59 | 428 | 428 |
| fig 6666666.28482.peg.2857 | R005678 | (gi:108797616) icl (Mmcs 0636) - isocitrate lyase [Mycobacterium sp. str. MCS]                                      | 92.06 | 428 | 428 |
| fig 6666666.28482.peg.2857 | R005677 | (gi:119866703) icl (Mkms 0649) - isocitrate lyase [Mycobacterium sp. str. KMS]                                      | 92.06 | 428 | 428 |
| fig 6666666.28482.peg.2857 | R005672 | (gi:118619631) icl (MUL 4536) - isocitrate lyase Icl [Mycobacterium ulcerans str. Agy99]                            | 91.59 | 428 | 428 |
| fig 6666666.28482.peg.2857 | R018929 | (gi:169631173) icl (MAB 4095c) - isocitrate lyase (AceA) [Mycobacterium abscessus str. ATCC 19977]                  | 83.49 | 428 | 428 |
| fig 6666666.28482.peg.2859 | R005153 | (gi:145223891) pcaA (Mflv 3304) - Cyclopropane-fatty-acyl-phospholipid synthase [Mycobacterium gilvum str. PYR-GCK] | 60.78 | 283 | 286 |

|                            |         |                                                                                                                              |       |     |     |
|----------------------------|---------|------------------------------------------------------------------------------------------------------------------------------|-------|-----|-----|
| fig 6666666.28482.peg.2859 | R005167 | (gi:108797926) cmaA2 (Mmcs 0952) - Cyclopropane-fatty-acyl-phospholipid synthase [Mycobacterium sp. str. MCS]                | 61.13 | 283 | 286 |
| fig 6666666.28482.peg.2860 | R005152 | (gi:118619634) pcaA (MUL 4539) - mycolic acid synthase PcaA [Mycobacterium ulcerans str. Agy99]                              | 87.11 | 287 | 287 |
| fig 6666666.28482.peg.2860 | R018707 | (gi:183980820) pcaA (MMAR 0796) - mycolic acid synthase PcaA [Mycobacterium marinum str. M]                                  | 87.11 | 287 | 287 |
| fig 6666666.28482.peg.2860 | R005151 | (gi:15828331) pcaA (ML2459) - Mycolic acid synthase [Mycobacterium leprae str. TN]                                           | 83.97 | 287 | 287 |
| fig 6666666.28482.peg.2860 | R018712 | (gi:221230808) pcaA (MLBr 02459) - Mycolic acid synthase [Mycobacterium leprae str. Br4923]                                  | 83.97 | 287 | 287 |
| fig 6666666.28482.peg.2860 | R018710 | (gi:253797397) pcaA (TBMG 00472) - mycolic acid synthase PcaA [Mycobacterium tuberculosis str. KZN 1435]                     | 82.93 | 287 | 287 |
| fig 6666666.28482.peg.2860 | R005144 | (gi:57116736) pcaA (Rv0470c) - MYCOLIC ACID SYNTHASE PCAA (CYCLOPROPANE SYNTHASE) [Mycobacterium tuberculosis str. H37Rv]    | 82.93 | 287 | 287 |
| fig 6666666.28482.peg.2860 | R005145 | (gi:148660236) pcaA (MRA 0476) - mycolic acid synthase PcaA [Mycobacterium tuberculosis str. H37Ra]                          | 82.93 | 287 | 287 |
| fig 6666666.28482.peg.2860 | R013397 | (gi:148821668) pcaA (TBFG 10477) - mycolic acid synthase pcaA (cyclopropane synthase) [Mycobacterium tuberculosis str. F11]  | 82.93 | 287 | 287 |
| fig 6666666.28482.peg.2860 | R005146 | (gi:15839858) pcaA (MT0486) - mycolic acid synthase [Mycobacterium tuberculosis str. CDC1551]                                | 82.93 | 287 | 287 |
| fig 6666666.28482.peg.2860 | R018709 | (gi:340625496) pcaA (MCAN 04691) - mycolic acid synthase PCAA [Mycobacterium canettii str. CIPT 140010059]                   | 82.93 | 287 | 287 |
| fig 6666666.28482.peg.2860 | R005148 | (gi:121636385) pcaA (BCG 0510c) - Mycolic acid synthase pcaA [Mycobacterium bovis str. BCG Pasteur 1173P2]                   | 82.93 | 287 | 287 |
| fig 6666666.28482.peg.2860 | R005147 | (gi:31791649) pcaA (Mb0479c) - MYCOLIC ACID SYNTHASE PCAA (CYCLOPROPANE SYNTHASE) [Mycobacterium bovis str. AF2122/97]       | 82.93 | 287 | 287 |
| fig 6666666.28482.peg.2860 | R018708 | (gi:339630539) pcaA (MAF 04730) - mycolic acid synthase PCAA (cyclopropane synthase) [Mycobacterium africanum str. GM041182] | 82.93 | 287 | 287 |
| fig 6666666.28482.peg.2860 | R018711 | (gi:224988857) pcaA (JTY 0480) - mycolic acid synthase [Mycobacterium bovis str. BCG str. Tokyo 172]                         | 82.93 | 287 | 287 |
| fig 6666666.28482.peg.2860 | R005149 | (gi:41410062) pcaA (MAP3964c) - UmaA2 [Mycobacterium avium str. K-10 (subsp. paratuberculosis)]                              | 81.18 | 287 | 287 |

|                            |         |                                                                                                                                                    |       |     |     |
|----------------------------|---------|----------------------------------------------------------------------------------------------------------------------------------------------------|-------|-----|-----|
| fig 6666666.28482.peg.2860 | R005150 | (gi:118465677) <i>pcaA</i> (MAV 4679) - cyclopropane-fatty-acyl-phospholipid synthase 1 [Mycobacterium avium str. 104]                             | 81.05 | 285 | 287 |
| fig 6666666.28482.peg.2860 | R005167 | (gi:108797926) <i>cmaA2</i> (Mmcs 0952) - Cyclopropane-fatty-acyl-phospholipid synthase [Mycobacterium sp. str. MCS]                               | 72.03 | 286 | 287 |
| fig 6666666.28482.peg.2860 | R005157 | (gi:108799701) <i>pcaA</i> (Mmcs 2735) - Cyclopropane-fatty-acyl-phospholipid synthase [Mycobacterium sp. str. MCS]                                | 71.73 | 283 | 287 |
| fig 6666666.28482.peg.2860 | R005156 | (gi:119868811) <i>pcaA</i> (Mkms 2779) - Cyclopropane-fatty-acyl-phospholipid synthase [Mycobacterium sp. str. KMS]                                | 71.73 | 283 | 287 |
| fig 6666666.28482.peg.2860 | R005153 | (gi:145223891) <i>pcaA</i> (Mflv 3304) - Cyclopropane-fatty-acyl-phospholipid synthase [Mycobacterium gilvum str. PYR-GCK]                         | 71.33 | 286 | 287 |
| fig 6666666.28482.peg.2860 | R005155 | (gi:126435345) <i>pcaA</i> (Mjls 2765) - Cyclopropane-fatty-acyl-phospholipid synthase [Mycobacterium sp. str. JLS]                                | 71.73 | 283 | 287 |
| fig 6666666.28482.peg.2860 | R005154 | (gi:120404005) <i>pcaA</i> (Mvan 3025) - Cyclopropane-fatty-acyl-phospholipid synthase [Mycobacterium vanbaalenii str. PYR-1]                      | 69.93 | 286 | 287 |
| fig 6666666.28482.peg.2860 | R018720 | (gi:333990669) <i>cmaA2</i> (JDM601 2029) - methoxy mycolic acid synthase [Mycobacterium sp. str. JDM601]                                          | 61.03 | 285 | 287 |
| fig 6666666.28482.peg.2860 | R018713 | (gi:333989092) <i>pcaA</i> (JDM601 0452) - mycolic acid synthase PcaA [Mycobacterium sp. str. JDM601]                                              | 63.54 | 276 | 287 |
| fig 6666666.28482.peg.2866 | R005134 | (gi:41410066) <i>hbhA</i> (MAP3968) - hypothetical protein [Mycobacterium avium str. K-10 (subsp. paratuberculosis)]                               | 90.62 | 160 | 197 |
| fig 6666666.28482.peg.2866 | R005129 | (gi:15607616) <i>hbhA</i> (Rv0475) - IRON-REGULATED HEPARIN BINDING HEMAGGLUTININ HBHA (ADHESIN) [Mycobacterium tuberculosis str. H37Rv]           | 89.31 | 159 | 197 |
| fig 6666666.28482.peg.2866 | R005130 | (gi:148660242) <i>hbhA</i> (MRA 0482) - iron-regulated heparin binding hemagglutinin Hbha [Mycobacterium tuberculosis str. H37Ra]                  | 89.31 | 159 | 197 |
| fig 6666666.28482.peg.2866 | R013396 | (gi:148821674) <i>hbhA</i> (TBFG 10483) - iron-regulated heparin binding hemagglutinin <i>hbhA</i> (adhesin) [Mycobacterium tuberculosis str. F11] | 89.31 | 159 | 197 |
| fig 6666666.28482.peg.2866 | R018702 | (gi:340625501) <i>hbhA</i> (MCAN 04751) - iron-regulated heparin binding hemagglutinin HBHA (adhesin) [Mycobacterium canettii str. CIPT 140010059] | 89.31 | 159 | 197 |
| fig 6666666.28482.peg.2866 | R018704 | (gi:224988863) <i>hbhA</i> (JTY 0486) - heparin binding hemagglutinin [Mycobacterium bovis str. BCG str. Tokyo 172]                                | 89.31 | 159 | 197 |

|                            |         |                                                                                                                                       |       |     |     |
|----------------------------|---------|---------------------------------------------------------------------------------------------------------------------------------------|-------|-----|-----|
| fig 6666666.28482.peg.2866 | R005133 | (gi:121636391) hbhA (BCG 0516) - Heparin binding hemagglutinin hbhA [Mycobacterium bovis str. BCG Pasteur 1173P2]                     | 89.31 | 159 | 197 |
| fig 6666666.28482.peg.2866 | R005132 | (gi:31791655) hbhA (Mb0485) - HEPARIN BINDING HEMAGGLUTININ HBHA (ADHESIN) [Mycobacterium bovis str. AF2122/97]                       | 89.31 | 159 | 197 |
| fig 6666666.28482.peg.2866 | R018701 | (gi:339630545) hbhA (MAF 04790) - iron-regulated heparin binding hemagglutinin HBHA (adhesin) [Mycobacterium africanum str. GM041182] | 89.31 | 159 | 197 |
| fig 6666666.28482.peg.2866 | R005137 | (gi:118619638) hbhA (MUL 4543) - iron-regulated heparin binding hemagglutinin HbhA [Mycobacterium ulcerans str. Agy99]                | 89.02 | 164 | 197 |
| fig 6666666.28482.peg.2866 | R018699 | (gi:183980824) hbhA (MMAR 0800) - iron-regulated heparin binding hemagglutinin HbhA [Mycobacterium marinum str. M]                    | 89.63 | 164 | 197 |
| fig 6666666.28482.peg.2866 | R018703 | (gi:253797403) hbhA (TBMG 00478) - iron-regulated heparin binding hemagglutinin hbhA [Mycobacterium tuberculosis str. KZN 1435]       | 89.31 | 159 | 197 |
| fig 6666666.28482.peg.2866 | R005135 | (gi:118463469) hbhA (MAV 4675) - heparin binding hemagglutinin hbha [Mycobacterium avium str. 104]                                    | 90    | 160 | 197 |
| fig 6666666.28482.peg.2866 | R005131 | (gi:15839865) hbhA (MT0493) - hypothetical protein [Mycobacterium tuberculosis str. CDC1551]                                          | 88.68 | 159 | 197 |
| fig 6666666.28482.peg.2866 | R018706 | (gi:333989103) hbhA (JDM601 0463) - iron-regulated heparin binding hemagglutinin HbhA [Mycobacterium sp. str. JDM601]                 | 73.33 | 165 | 197 |
| fig 6666666.28482.peg.2866 | R005136 | (gi:15828329) hbhA (ML2454) - possible hemagglutinin. [Mycobacterium leprae str. TN]                                                  | 84.91 | 159 | 197 |
| fig 6666666.28482.peg.2866 | R018705 | (gi:221230806) hbhA (MLBr 02454) - putative hemagglutinin [Mycobacterium leprae str. Br4923]                                          | 84.91 | 159 | 197 |
| fig 6666666.28482.peg.2866 | R005143 | (gi:108797623) hbhA (Mmcs 0643) - hypothetical protein [Mycobacterium sp. str. MCS]                                                   | 71.86 | 164 | 197 |
| fig 6666666.28482.peg.2866 | R005142 | (gi:119866710) hbhA (Mkms 0656) - hypothetical protein [Mycobacterium sp. str. KMS]                                                   | 71.86 | 164 | 197 |
| fig 6666666.28482.peg.2866 | R005141 | (gi:126433247) hbhA (Mjls 0636) - hypothetical protein [Mycobacterium sp. str. JLS]                                                   | 71.86 | 164 | 197 |
| fig 6666666.28482.peg.2866 | R005139 | (gi:145220706) hbhA (Mflv 0100) - hypothetical protein [Mycobacterium gilvum str. PYR-GCK]                                            | 69.82 | 166 | 197 |
| fig 6666666.28482.peg.2866 | R005140 | (gi:120401823) hbhA (Mvan 0808) - hypothetical protein [Mycobacterium vanbaalenii str. PYR-1]                                         | 69.68 | 155 | 197 |

|                            |         |                                                                                                                                                  |       |     |     |
|----------------------------|---------|--------------------------------------------------------------------------------------------------------------------------------------------------|-------|-----|-----|
| fig 6666666.28482.peg.2866 | R005138 | (gi:118468465) hbhA (MSMEG 0919) - heparin-binding hemagglutinin [Mycobacterium smegmatis str. MC2 155]                                          | 66.67 | 159 | 197 |
| fig 6666666.28482.peg.2866 | R018700 | (gi:169631161) hbhA (MAB 4083c) - Heparin-binding hemagglutinin (adhesin) [Mycobacterium abscessus str. ATCC 19977]                              | 60.26 | 156 | 197 |
| fig 6666666.28482.peg.2891 | R005750 | (gi:118463455) proC (MAV 4652) - pyrroline-5-carboxylate reductase [Mycobacterium avium str. 104]                                                | 86.6  | 290 | 290 |
| fig 6666666.28482.peg.2891 | R005749 | (gi:41410089) proC (MAP3991) - pyrroline-5-carboxylate reductase [Mycobacterium avium str. K-10 (subsp. paratuberculosis)]                       | 85.91 | 290 | 290 |
| fig 6666666.28482.peg.2891 | R005751 | (gi:15828312) proC (ML2430) - pyrroline-5-carboxylate reductase [Mycobacterium leprae str. TN]                                                   | 81.44 | 290 | 290 |
| fig 6666666.28482.peg.2891 | R018986 | (gi:221230789) proC (MLBr 02430) - pyrroline-5-carboxylate reductase [Mycobacterium leprae str. Br4923]                                          | 81.44 | 290 | 290 |
| fig 6666666.28482.peg.2891 | R018980 | (gi:183980850) proC (MMAR 0826) - pyrroline-5-carboxylate reductase [Mycobacterium marinum str. M]                                               | 81.23 | 277 | 290 |
| fig 6666666.28482.peg.2891 | R005752 | (gi:118619662) proC (MUL 4570) - pyrroline-5-carboxylate reductase ProC [Mycobacterium ulcerans str. Agy99]                                      | 81.23 | 277 | 290 |
| fig 6666666.28482.peg.2891 | R018983 | (gi:340625527) proC (MCAN 05011) - putative pyrroline-5-carboxylate reductase PROC [Mycobacterium canettii str. CIPT 140010059]                  | 82.13 | 290 | 290 |
| fig 6666666.28482.peg.2891 | R018985 | (gi:224988889) proC (JTY 0512) - pyrroline-5-carboxylate reductase [Mycobacterium bovis str. BCG str. Tokyo 172]                                 | 82.13 | 290 | 290 |
| fig 6666666.28482.peg.2891 | R005748 | (gi:121636417) proC (BCG 0542) - putative pyrroline-5-carboxylate reductase proC [Mycobacterium bovis str. BCG Pasteur 1173P2]                   | 82.13 | 290 | 290 |
| fig 6666666.28482.peg.2891 | R005747 | (gi:31791681) proC (Mb0511) - pyrroline-5-carboxylate reductase [Mycobacterium bovis str. AF2122/97]                                             | 82.13 | 290 | 290 |
| fig 6666666.28482.peg.2891 | R018982 | (gi:339630571) proC (MAF 05050) - putative pyrroline-5-carboxylate reductase PROC (P5CR) (P5C reductase) [Mycobacterium africanum str. GM041182] | 82.13 | 290 | 290 |
| fig 6666666.28482.peg.2891 | R018984 | (gi:253797430) proC (TBMG 00505) - pyrroline-5-carboxylate reductase [Mycobacterium tuberculosis str. KZN 1435]                                  | 81.79 | 290 | 290 |
| fig 6666666.28482.peg.2891 | R005744 | (gi:15607641) proC (Rv0500) - pyrroline-5-carboxylate reductase [Mycobacterium tuberculosis str. H37Rv]                                          | 81.79 | 290 | 290 |
| fig 6666666.28482.peg.2891 | R005745 | (gi:148660268) proC (MRA 0507) - pyrroline-5-carboxylate reductase [Mycobacterium tuberculosis str. H37Ra]                                       | 81.79 | 290 | 290 |



|                            |         |                                                                                                                                                                                                                                                                     |       |     |     |
|----------------------------|---------|---------------------------------------------------------------------------------------------------------------------------------------------------------------------------------------------------------------------------------------------------------------------|-------|-----|-----|
| fig 6666666.28482.peg.2891 | R013453 | (gi:148821700) proC (TBF 10509) - pyrroline-5-carboxylate reductase proC [Mycobacterium tuberculosis str. F11]                                                                                                                                                      | 81.79 | 290 | 290 |
| fig 6666666.28482.peg.2891 | R005746 | (gi:15839892) proC (MT0520) - pyrroline-5-carboxylate reductase [Mycobacterium tuberculosis str. CDC1551]                                                                                                                                                           | 81.79 | 290 | 290 |
| fig 6666666.28482.peg.2891 | R005758 | (gi:108797648) proC (Mmcs 0668) - pyrroline-5-carboxylate reductase [Mycobacterium sp. str. MCS]                                                                                                                                                                    | 72.76 | 290 | 290 |
| fig 6666666.28482.peg.2891 | R005757 | (gi:119866735) proC (Mkms 0681) - pyrroline-5-carboxylate reductase [Mycobacterium sp. str. KMS]                                                                                                                                                                    | 72.76 | 290 | 290 |
| fig 6666666.28482.peg.2891 | R005756 | (gi:126433272) proC (Mjls 0661) - pyrroline-5-carboxylate reductase [Mycobacterium sp. str. JLS]                                                                                                                                                                    | 72.76 | 290 | 290 |
| fig 6666666.28482.peg.2891 | R005753 | (gi:118472220) proC (MSMEG 0943) - pyrroline-5-carboxylate reductase [Mycobacterium smegmatis str. MC2 155]                                                                                                                                                         | 73.45 | 290 | 290 |
| fig 6666666.28482.peg.2891 | R005754 | (gi:145220681) proC (Mflv 0075) - pyrroline-5-carboxylate reductase [Mycobacterium gilvum str. PYR-GCK]                                                                                                                                                             | 72.41 | 290 | 290 |
| fig 6666666.28482.peg.2891 | R005755 | (gi:120401852) proC (Mvan 0837) - transcriptional regulator, Fis family [Mycobacterium vanbaalenii str. PYR-1]                                                                                                                                                      | 72.41 | 290 | 290 |
| fig 6666666.28482.peg.2891 | R018981 | (gi:169631084) proC (MAB 4005c) - pyrroline-5-carboxylate reductase [Mycobacterium abscessus str. ATCC 19977]                                                                                                                                                       | 66    | 290 | 290 |
| fig 6666666.28482.peg.2891 | R018987 | (gi:333989135) proC (JDM601 0495) - pyrroline-5-carboxylate reductase ProC [Mycobacterium sp. str. JDM601]                                                                                                                                                          | 65.87 | 290 | 290 |
| fig 6666666.28482.peg.2895 | R005158 | (gi:15607644) cmaA2 (Rv0503c) - CYCLOPROPANE-FATTY-ACYL-PHOSPHOLIPID SYNTHASE 2 CMAA2 (CYCLOPROPANE FATTY ACID SYNTHASE) (CFA SYNTHASE) (CYCLOPROPANE MYCOLIC ACID SYNTHASE 2) (MYCOLIC ACID TRANS-CYCLOPROPANE SYNTHETASE) [Mycobacterium tuberculosis str. H37Rv] | 89.77 | 303 | 306 |
| fig 6666666.28482.peg.2895 | R005159 | (gi:148660272) cmaA2 (MRA 0511) - cyclopropane-fatty-acyl-phospholipid synthase 2 [Mycobacterium tuberculosis str. H37Ra]                                                                                                                                           | 89.77 | 303 | 306 |
| fig 6666666.28482.peg.2895 | R018718 | (gi:224988893) cmaA2 (JTY 0516) - cyclopropane-fatty-acyl-phospholipid synthase 2 [Mycobacterium bovis str. BCG str. Tokyo 172]                                                                                                                                     | 89.77 | 303 | 306 |
| fig 6666666.28482.peg.2895 | R005162 | (gi:121636421) cmaA2 (BCG 0546c) - Cyclopropane-fatty-acyl-phospholipid synthase 2 cmaA2 [Mycobacterium bovis str. BCG Pasteur 1173P2]                                                                                                                              | 89.77 | 303 | 306 |

|                            |         |                                                                                                                                                                                                                                                                  |       |     |     |
|----------------------------|---------|------------------------------------------------------------------------------------------------------------------------------------------------------------------------------------------------------------------------------------------------------------------|-------|-----|-----|
| fig 6666666.28482.peg.2895 | R005161 | (gi:31791685) cmaA2 (Mb0515c) - CYCLOPROPANE-FATTY-ACYL-PHOSPHOLIPID SYNTHASE 2 CMAA2 (CYCLOPROPANE FATTY ACID SYNTHASE) (CFA SYNTHASE) (CYCLOPROPANE MYCOLIC ACID SYNTHASE 2) (MYCOLIC ACID TRANS-CYCLOPROPANE SYNTHETASE) [Mycobacterium bovis str. AF2122/97] | 89.77 | 303 | 306 |
| fig 6666666.28482.peg.2895 | R018715 | (gi:339630576) cmaA2 (MAF 05100) - cyclopropane-fatty-acyl-phospholipid synthase 2 CMAA2 (cyclopropane fatty acid synthase) [Mycobacterium africanum str. GM041182]                                                                                              | 89.77 | 303 | 306 |
| fig 6666666.28482.peg.2895 | R018717 | (gi:253797435) cmaA2 (TBMG 00510) - cyclopropane-fatty-acyl-phospholipid synthase 2 cmaA2 [Mycobacterium tuberculosis str. KZN 1435]                                                                                                                             | 89.77 | 303 | 306 |
| fig 6666666.28482.peg.2895 | R013398 | (gi:148821705) cmaA2 (TBF 10514) - cyclopropane-fatty-acyl-phospholipid synthase 2 cmaA2 [Mycobacterium tuberculosis str. F11]                                                                                                                                   | 89.77 | 303 | 306 |
| fig 6666666.28482.peg.2895 | R005160 | (gi:15839896) cmaA2 (MT0524) - cyclopropane-fatty-acyl-phospholipid synthase 2 [Mycobacterium tuberculosis str. CDC1551]                                                                                                                                         | 89.77 | 303 | 306 |
| fig 6666666.28482.peg.2895 | R018716 | (gi:340625532) cmaA2 (MCAN 05061) - cyclopropane-fatty-acyl-phospholipid synthase 2 CMAA2 [Mycobacterium canettii str. CIPT 140010059]                                                                                                                           | 89.44 | 303 | 306 |
| fig 6666666.28482.peg.2895 | R018714 | (gi:183980855) cmaA2 (MMAR 0831) - cyclopropane-fatty-acyl-phospholipid synthase 2 CmaA2 [Mycobacterium marinum str. M]                                                                                                                                          | 82.15 | 297 | 306 |
| fig 6666666.28482.peg.2895 | R005166 | (gi:118619667) cmaA2 (MUL 4575) - cyclopropane-fatty-acyl-phospholipid synthase 2 CmaA2 [Mycobacterium ulcerans str. Agy99]                                                                                                                                      | 81.82 | 297 | 306 |
| fig 6666666.28482.peg.2895 | R005164 | (gi:118465133) cmaA2 (MAV 4647) - cyclopropane-fatty-acyl-phospholipid synthase 2 [Mycobacterium avium str. 104]                                                                                                                                                 | 78.93 | 298 | 306 |
| fig 6666666.28482.peg.2895 | R005163 | (gi:41410093) cmaA2 (MAP3995c) - CmaA2 [Mycobacterium avium str. K-10 (subsp. paratuberculosis)]                                                                                                                                                                 | 78.6  | 298 | 306 |
| fig 6666666.28482.peg.2895 | R005165 | (gi:15828307) cmaA2 (ML2426) - cyclopropane mycolic acid synthase [Mycobacterium leprae str. TN]                                                                                                                                                                 | 78.67 | 297 | 306 |
| fig 6666666.28482.peg.2895 | R018719 | (gi:221230784) cmaA2 (MLBr 02426) - cyclopropane mycolic acid synthase [Mycobacterium leprae str. Br4923]                                                                                                                                                        | 78.67 | 297 | 306 |
| fig 6666666.28482.peg.2895 | R018720 | (gi:333990669) cmaA2 (JDM601 2029) - methoxy mycolic acid synthase [Mycobacterium sp. str. JDM601]                                                                                                                                                               | 65.1  | 298 | 306 |

|                            |         |                                                                                                                               |       |     |     |
|----------------------------|---------|-------------------------------------------------------------------------------------------------------------------------------|-------|-----|-----|
| fig 6666666.28482.peg.2930 | R018221 | (gi:121636448) espl (BCG 0573) - hypothetical protein [Mycobacterium bovis str. BCG Pasteur 1173P2]                           | 68.75 | 423 | 428 |
| fig 6666666.28482.peg.2946 | R005631 | (gi:41407632) secA2 (MAP1534) - translocase [Mycobacterium avium str. K-10 (subsp. paratuberculosis)]                         | 93.18 | 774 | 774 |
| fig 6666666.28482.peg.2946 | R005632 | (gi:118463295) secA2 (MAV 2894) - ATPase SecA2 [Mycobacterium avium str. 104]                                                 | 93.44 | 774 | 774 |
| fig 6666666.28482.peg.2946 | R019897 | (gi:253799135) secA2 (TBMG 02172) - preprotein translocase subunit SecA [Mycobacterium tuberculosis str. KZN 1435]            | 90.49 | 774 | 774 |
| fig 6666666.28482.peg.2946 | R005626 | (gi:15608958) secA2 (Rv1821) - translocase [Mycobacterium tuberculosis str. H37Rv]                                            | 90.49 | 774 | 774 |
| fig 6666666.28482.peg.2946 | R005627 | (gi:148661627) secA2 (MRA 1833) - translocase [Mycobacterium tuberculosis str. H37Ra]                                         | 90.49 | 774 | 774 |
| fig 6666666.28482.peg.2946 | R013441 | (gi:148823034) secA2 (TBFG 11851) - preprotein translocase ATPase secA2 subunit [Mycobacterium tuberculosis str. F11]         | 90.49 | 774 | 774 |
| fig 6666666.28482.peg.2946 | R005628 | (gi:15841291) secA2 (MT1869) - translocase [Mycobacterium tuberculosis str. CDC1551]                                          | 90.49 | 774 | 774 |
| fig 6666666.28482.peg.2946 | R019898 | (gi:224990208) secA2 (JTY 1840) - preprotein translocase subunit SecA [Mycobacterium bovis str. BCG str. Tokyo 172]           | 90.49 | 774 | 774 |
| fig 6666666.28482.peg.2946 | R005630 | (gi:121637724) secA2 (BCG 1856) - putative preprotein translocase secA2 [Mycobacterium bovis str. BCG Pasteur 1173P2]         | 90.49 | 774 | 774 |
| fig 6666666.28482.peg.2946 | R005629 | (gi:31793011) secA2 (Mb1852) - translocase [Mycobacterium bovis str. AF2122/97]                                               | 90.49 | 774 | 774 |
| fig 6666666.28482.peg.2946 | R019895 | (gi:339631874) secA2 (MAF 18430) - putative preprotein translocase ATPase SECA2 [Mycobacterium africanum str. GM041182]       | 90.49 | 774 | 774 |
| fig 6666666.28482.peg.2946 | R019896 | (gi:340626829) secA2 (MCAN 18361) - putative preprotein translocase ATPase SECA2 [Mycobacterium canettii str. CIPT 140010059] | 90.23 | 774 | 774 |
| fig 6666666.28482.peg.2946 | R019893 | (gi:183982705) secA2 (MMAR 2698) - preprotein translocase subunit SecA [Mycobacterium marinum str. M]                         | 90.36 | 774 | 774 |
| fig 6666666.28482.peg.2946 | R005634 | (gi:118618429) secA2 (MUL 3040) - preprotein translocase ATPase SecA2 [Mycobacterium ulcerans str. Agy99]                     | 90.36 | 774 | 774 |
| fig 6666666.28482.peg.2946 | R005633 | (gi:15828125) secA2 (ML2082) - translocase [Mycobacterium leprae str. TN]                                                     | 88.43 | 774 | 774 |

|                            |         |                                                                                                                              |       |     |     |
|----------------------------|---------|------------------------------------------------------------------------------------------------------------------------------|-------|-----|-----|
| fig 6666666.28482.peg.2946 | R019899 | (gi:221230602) secA2 (MLBr 02082) - preprotein translocase subunit SecA [Mycobacterium leprae str. Br4923]                   | 88.43 | 774 | 774 |
| fig 6666666.28482.peg.2946 | R005640 | (gi:108799816) secA2 (Mmcs 2850) - SecA DEAD-like protein [Mycobacterium sp. str. MCS]                                       | 85.01 | 774 | 774 |
| fig 6666666.28482.peg.2946 | R005639 | (gi:119868926) secA2 (Mkms 2894) - SecA DEAD domain protein [Mycobacterium sp. str. KMS]                                     | 85.01 | 774 | 774 |
| fig 6666666.28482.peg.2946 | R005638 | (gi:126435460) secA2 (Mjls 2881) - SecA DEAD domain protein [Mycobacterium sp. str. JLS]                                     | 85.01 | 774 | 774 |
| fig 6666666.28482.peg.2946 | R005637 | (gi:120404141) secA2 (Mvan 3162) - SecA DEAD domain protein [Mycobacterium vanbaalenii str. PYR-1]                           | 83.44 | 772 | 774 |
| fig 6666666.28482.peg.2946 | R019900 | (gi:333990556) secA2 (JDM601 1916) - preprotein translocase ATPase SecA2 [Mycobacterium sp. str. JDM601]                     | 82.95 | 771 | 774 |
| fig 6666666.28482.peg.2946 | R005635 | (gi:118468764) secA2 (MSMEG 3654) - ATPase SecA2 [Mycobacterium smegmatis str. MC2 155]                                      | 83.29 | 774 | 774 |
| fig 6666666.28482.peg.2946 | R005636 | (gi:145223994) secA2 (Mflv 3408) - SecA DEAD domain protein [Mycobacterium gilvum str. PYR-GCK]                              | 82.28 | 772 | 774 |
| fig 6666666.28482.peg.2946 | R019894 | (gi:169629483) secA2 (MAB 2397) - preprotein translocase subunit SecA [Mycobacterium abscessus str. ATCC 19977]              | 79.82 | 763 | 774 |
| fig 6666666.28482.peg.3003 | R019234 | (gi:253800263) sigH (TBMG 03269) - RNA polymerase sigma factor RpoE [Mycobacterium tuberculosis str. KZN 1435]               | 87.77 | 229 | 231 |
| fig 6666666.28482.peg.3003 | R013500 | (gi:148824423) sigH (TBFG 13250) - alternative RNA polymerase sigma factor sigH (rpoE) [Mycobacterium tuberculosis str. F11] | 87.77 | 229 | 231 |
| fig 6666666.28482.peg.3003 | R006162 | (gi:15842811) sigH (MT3320) - RNA polymerase sigma-70 factor [Mycobacterium tuberculosis str. CDC1551]                       | 87.77 | 229 | 231 |
| fig 6666666.28482.peg.3003 | R006166 | (gi:118465818) sigH (MAV 4171) - RNA polymerase sigma-70 factor, family protein [Mycobacterium avium str. 104]               | 85.48 | 229 | 231 |
| fig 6666666.28482.peg.3003 | R006165 | (gi:41409422) sigH (MAP3324c) - RNA polymerase sigma-70 factor [Mycobacterium avium str. K-10 (subsp. paratuberculosis)]     | 85.48 | 229 | 231 |
| fig 6666666.28482.peg.3003 | R019233 | (gi:340628202) sigH (MCAN 32411) - alternative RNA polymerase sigma-E factor [Mycobacterium canettii str. CIPT 140010059]    | 89.81 | 216 | 231 |
| fig 6666666.28482.peg.3003 | R006160 | (gi:15610359) sigH (Rv3223c) - RNA polymerase sigma-70 factor [Mycobacterium tuberculosis str. H37Rv]                        | 89.35 | 216 | 231 |

|                            |         |                                                                                                                                            |       |     |     |
|----------------------------|---------|--------------------------------------------------------------------------------------------------------------------------------------------|-------|-----|-----|
| fig 6666666.28482.peg.3003 | R006161 | (gi:148663085) sigH (MRA 3263) - RNA polymerase sigma-70 factor [Mycobacterium tuberculosis str. H37Ra]                                    | 89.35 | 216 | 231 |
| fig 6666666.28482.peg.3003 | R019235 | (gi:224991603) sigH (JTY 3246) - RNA polymerase sigma factor RpoE [Mycobacterium bovis str. BCG str. Tokyo 172]                            | 89.35 | 216 | 231 |
| fig 6666666.28482.peg.3003 | R006164 | (gi:121639111) sigH (BCG 3251c) - Alternative rna polymerase sigma-E factor (sigma-24) sigH [Mycobacterium bovis str. BCG Pasteur 1173P2]  | 89.35 | 216 | 231 |
| fig 6666666.28482.peg.3003 | R006163 | (gi:31794402) sigH (Mb3250c) - RNA polymerase sigma-70 factor [Mycobacterium bovis str. AF2122/97]                                         | 89.35 | 216 | 231 |
| fig 6666666.28482.peg.3003 | R019232 | (gi:339633232) sigH (MAF 32330) - alternative RNA polymerase sigma-E factor (SIGMA-24) SIGH (RPOE) [Mycobacterium africanum str. GM041182] | 88.89 | 216 | 231 |
| fig 6666666.28482.peg.3003 | R019230 | (gi:183981357) sigH (MMAR 1334) - RNA polymerase sigma factor RpoE [Mycobacterium marinum str. M]                                          | 87.77 | 229 | 231 |
| fig 6666666.28482.peg.3003 | R006173 | (gi:108798350) sigH (Mmcs 1379) - RNA polymerase, sigma-24 subunit, ECF subfamily [Mycobacterium sp. str. MCS]                             | 84.89 | 225 | 231 |
| fig 6666666.28482.peg.3003 | R006172 | (gi:119867447) sigH (Mkms 1397) - RNA polymerase, sigma-24 subunit, ECF subfamily [Mycobacterium sp. str. KMS]                             | 84.89 | 225 | 231 |
| fig 6666666.28482.peg.3003 | R006171 | (gi:126434015) sigH (Mjls 1413) - RNA polymerase, sigma-24 subunit, ECF subfamily [Mycobacterium sp. str. JLS]                             | 84.89 | 225 | 231 |
| fig 6666666.28482.peg.3003 | R006167 | (gi:118618027) sigH (MUL 2545) - alternative RNA polymerase sigma-E factor (sigma-24) SigH (RpoE) [Mycobacterium ulcerans str. Agy99]      | 89.81 | 216 | 231 |
| fig 6666666.28482.peg.3003 | R006170 | (gi:120402777) sigH (Mvan 1778) - RNA polymerase, sigma-24 subunit, ECF subfamily [Mycobacterium vanbaalenii str. PYR-1]                   | 82.76 | 228 | 231 |
| fig 6666666.28482.peg.3003 | R019236 | (gi:333991577) sigH (JDM601 2937) - RNA polymerase sigma-E factor (sigma-24) SigH (RpoE) [Mycobacterium sp. str. JDM601]                   | 80.43 | 230 | 231 |
| fig 6666666.28482.peg.3003 | R006169 | (gi:145225267) sigH (Mflv 4689) - RNA polymerase, sigma-24 subunit, ECF subfamily [Mycobacterium gilvum str. PYR-GCK]                      | 81.78 | 228 | 231 |
| fig 6666666.28482.peg.3003 | R006168 | (gi:118469630) sigH (MSMEG 1914) - RNA polymerase sigma-70 factor, family protein [Mycobacterium smegmatis str. MC2 155]                   | 91.1  | 191 | 231 |
| fig 6666666.28482.peg.3003 | R019231 | (gi:169630624) sigH (MAB 3543c) - RNA polymerase sigma-E factor [Mycobacterium abscessus str. ATCC 19977]                                  | 83.94 | 193 | 231 |
| fig 6666666.28482.peg.3038 | R016423 | (gi:218891591) pvdY (PLES 28671) - hypothetical protein [Pseudomonas aeruginosa str. LESB58]                                               | 60.43 | 235 | 288 |

|                            |         |                                                                                                                                                |       |     |     |
|----------------------------|---------|------------------------------------------------------------------------------------------------------------------------------------------------|-------|-----|-----|
| fig 6666666.28482.peg.3085 | R019266 | (gi:183984600) prrA (MMAR 4633) - two-component response transcriptional regulatory protein PrrA [Mycobacterium marinum str. M]                | 98.73 | 236 | 236 |
| fig 6666666.28482.peg.3085 | R019270 | (gi:253800073) prrA (TBMG 03086) - two component system transcriptional regulator prrA [Mycobacterium tuberculosis str. KZN 1435]              | 98.31 | 236 | 236 |
| fig 6666666.28482.peg.3085 | R006231 | (gi:15608043) prrA (Rv0903c) - TWO COMPONENT RESPONSE TRANSCRIPTIONAL REGULATORY PROTEIN PRRA [Mycobacterium tuberculosis str. H37Rv]          | 98.31 | 236 | 236 |
| fig 6666666.28482.peg.3085 | R006232 | (gi:148660681) prrA (MRA 0910) - two component response transcriptional regulatory protein PrrA [Mycobacterium tuberculosis str. H37Ra]        | 98.31 | 236 | 236 |
| fig 6666666.28482.peg.3085 | R013505 | (gi:148822112) prrA (TBFG 10921) - two component system response transcriptional regulatory protein prrA [Mycobacterium tuberculosis str. F11] | 98.31 | 236 | 236 |
| fig 6666666.28482.peg.3085 | R006233 | (gi:15840322) prrA (MT0926) - DNA-binding response regulator [Mycobacterium tuberculosis str. CDC1551]                                         | 98.31 | 236 | 236 |
| fig 6666666.28482.peg.3085 | R019269 | (gi:340625914) prrA (MCAN 09031) - two component response transcriptional regulatory protein PRRA [Mycobacterium canettii str. CIPT 140010059] | 98.31 | 236 | 236 |
| fig 6666666.28482.peg.3085 | R019271 | (gi:224989297) prrA (JTY 0925) - two component response transcriptional regulatory protein [Mycobacterium bovis str. BCG str. Tokyo 172]       | 98.31 | 236 | 236 |
| fig 6666666.28482.peg.3085 | R006235 | (gi:121636826) prrA (BCG 0955c) - Two component response transcriptional regulatory protein prrA [Mycobacterium bovis str. BCG Pasteur 1173P2] | 98.31 | 236 | 236 |
| fig 6666666.28482.peg.3085 | R006234 | (gi:31792091) prrA (Mb0927c) - TWO COMPONENT RESPONSE TRANSCRIPTIONAL REGULATORY PROTEIN PRRA [Mycobacterium bovis str. AF2122/97]             | 98.31 | 236 | 236 |
| fig 6666666.28482.peg.3085 | R019268 | (gi:339630968) prrA (MAF 09120) - two component response transcriptional regulatory protein PRRA [Mycobacterium africanum str. GM041182]       | 98.31 | 236 | 236 |
| fig 6666666.28482.peg.3085 | R006239 | (gi:118616126) prrA (MUL 0248) - two component response transcriptional regulatory protein PrrA [Mycobacterium ulcerans str. Agy99]            | 97.88 | 236 | 236 |
| fig 6666666.28482.peg.3085 | R006236 | (gi:41406932) prrA (MAP0834c) - hypothetical protein [Mycobacterium avium str. K-10 (subsp. paratuberculosis)]                                 | 98.28 | 233 | 236 |

|                            |         |                                                                                                                                       |       |     |     |
|----------------------------|---------|---------------------------------------------------------------------------------------------------------------------------------------|-------|-----|-----|
| fig 6666666.28482.peg.3085 | R006237 | (gi:118465275) prrA (MAV 1022) - two component response transcriptional regulatory protein prra [Mycobacterium avium str. 104]        | 98.28 | 233 | 236 |
| fig 6666666.28482.peg.3085 | R006238 | (gi:15828139) prrA (ML2123) - two-component response regulator [Mycobacterium leprae str. TN]                                         | 96.57 | 233 | 236 |
| fig 6666666.28482.peg.3085 | R019272 | (gi:221230616) prrA (MLBr 02123) - two-component response regulator [Mycobacterium leprae str. Br4923]                                | 96.57 | 233 | 236 |
| fig 6666666.28482.peg.3085 | R006242 | (gi:120405958) prrA (Mvan 5009) - two component transcriptional regulator, winged helix family [Mycobacterium vanbaalenii str. PYR-1] | 95.28 | 233 | 236 |
| fig 6666666.28482.peg.3085 | R006245 | (gi:108801411) prrA (Mmcs 4448) - two component transcriptional regulator, winged helix family [Mycobacterium sp. str. MCS]           | 95.28 | 233 | 236 |
| fig 6666666.28482.peg.3085 | R006244 | (gi:119870564) prrA (Mkms 4535) - two component transcriptional regulator, winged helix family [Mycobacterium sp. str. KMS]           | 95.28 | 233 | 236 |
| fig 6666666.28482.peg.3085 | R006241 | (gi:145222334) prrA (Mflv 1744) - two component transcriptional regulator, winged helix family [Mycobacterium gilvum str. PYR-GCK]    | 95.71 | 233 | 236 |
| fig 6666666.28482.peg.3085 | R006243 | (gi:126437395) prrA (Mjls 4830) - two component transcriptional regulator, winged helix family [Mycobacterium sp. str. JLS]           | 94.85 | 233 | 236 |
| fig 6666666.28482.peg.3085 | R006240 | (gi:118468513) prrA (MSMEG 5662) - DNA-binding response regulator PrrA [Mycobacterium smegmatis str. MC2 155]                         | 93.64 | 236 | 236 |
| fig 6666666.28482.peg.3085 | R019267 | (gi:169628053) prrA (MAB 0956c) - transcriptional regulatory protein PrrA [Mycobacterium abscessus str. ATCC 19977]                   | 91.42 | 233 | 236 |
| fig 6666666.28482.peg.3085 | R019273 | (gi:333989463) prrA (JDM601 0823) - two-component response transcriptional regulatory protein PrrA [Mycobacterium sp. str. JDM601]    | 91.1  | 236 | 236 |
| fig 6666666.28482.peg.3086 | R019278 | (gi:253800074) prrB (TBMG 03087) - two component system sensor histidine kinase prrB [Mycobacterium tuberculosis str. KZN 1435]       | 89.51 | 429 | 429 |
| fig 6666666.28482.peg.3086 | R006246 | (gi:15608042) prrB (Rv0902c) - TWO COMPONENT SENSOR HISTIDINE KINASE PRRB [Mycobacterium tuberculosis str. H37Rv]                     | 89.51 | 429 | 429 |
| fig 6666666.28482.peg.3086 | R006247 | (gi:148660680) prrB (MRA 0909) - two component sensor histidine kinase PrrB [Mycobacterium tuberculosis str. H37Ra]                   | 89.51 | 429 | 429 |
| fig 6666666.28482.peg.3086 | R013506 | (gi:148822111) prrB (TBFG 10920) - two component system sensor histidine kinase prrB [Mycobacterium tuberculosis str. F11]            | 89.51 | 429 | 429 |
| fig 6666666.28482.peg.3086 | R019277 | (gi:340625913) prrB (MCAN 09021) - two component sensor histidine kinase PRRB [Mycobacterium canettii str. CIPT 140010059]            | 89.51 | 429 | 429 |

|                            |         |                                                                                                                                           |       |     |     |
|----------------------------|---------|-------------------------------------------------------------------------------------------------------------------------------------------|-------|-----|-----|
| fig 6666666.28482.peg.3086 | R019279 | (gi:224989296) prrB (JTY 0924) - two component sensor histidine kinase<br>[Mycobacterium bovis str. BCG str. Tokyo 172]                   | 89.51 | 429 | 429 |
| fig 6666666.28482.peg.3086 | R006250 | (gi:121636825) prrB (BCG 0954c) - Two component sensor histidine kinase prrB<br>[Mycobacterium bovis str. BCG Pasteur 1173P2]             | 89.51 | 429 | 429 |
| fig 6666666.28482.peg.3086 | R006249 | (gi:31792090) prrB (Mb0926c) - TWO COMPONENT SENSOR HISTIDINE KINASE PRRB<br>[Mycobacterium bovis str. AF2122/97]                         | 89.51 | 429 | 429 |
| fig 6666666.28482.peg.3086 | R019276 | (gi:339630967) prrB (MAF 09110) - two component sensor histidine kinase PRRB<br>[Mycobacterium africanum str. GM041182]                   | 89.51 | 429 | 429 |
| fig 6666666.28482.peg.3086 | R006248 | (gi:15840321) prrB (MT0925) - sensor histidine kinase [Mycobacterium tuberculosis<br>str. CDC1551]                                        | 89.51 | 429 | 429 |
| fig 6666666.28482.peg.3086 | R019274 | (gi:183984601) prrB (MMAR 4634) - two-component sensor histidine kinase PrrB<br>[Mycobacterium marinum str. M]                            | 88.58 | 429 | 429 |
| fig 6666666.28482.peg.3086 | R006254 | (gi:118616127) prrB (MUL 0249) - two component sensor histidine kinase PrrB<br>[Mycobacterium ulcerans str. Agy99]                        | 88.34 | 429 | 429 |
| fig 6666666.28482.peg.3086 | R006253 | (gi:15828140) prrB (ML2124) - sensor histidine kinase [Mycobacterium leprae str.<br>TN]                                                   | 89.04 | 429 | 429 |
| fig 6666666.28482.peg.3086 | R019280 | (gi:221230617) prrB (MLBr 02124) - sensor histidine kinase [Mycobacterium leprae<br>str. Br4923]                                          | 89.04 | 429 | 429 |
| fig 6666666.28482.peg.3086 | R019281 | (gi:333989462) prrB (JDM601 0822) - two-component sensor histidine kinase<br>[Mycobacterium sp. str. JDM601]                              | 80.37 | 428 | 429 |
| fig 6666666.28482.peg.3086 | R006252 | (gi:118464817) prrB (MAV 1021) - sensor-type histidine kinase PrrB [Mycobacterium<br>avium str. 104]                                      | 80.65 | 429 | 429 |
| fig 6666666.28482.peg.3086 | R006255 | (gi:118472850) prrB (MSMEG 5663) - sensor-type histidine kinase PrrB<br>[Mycobacterium smegmatis str. MC2 155]                            | 78.74 | 428 | 429 |
| fig 6666666.28482.peg.3086 | R006260 | (gi:108801412) prrB (Mmcs 4449) - periplasmic sensor signal transduction histidine<br>kinase [Mycobacterium sp. str. MCS]                 | 79.72 | 428 | 429 |
| fig 6666666.28482.peg.3086 | R006259 | (gi:119870565) prrB (Mkms 4536) - integral membrane sensor signal transduction<br>histidine kinase [Mycobacterium sp. str. KMS]           | 79.72 | 428 | 429 |
| fig 6666666.28482.peg.3086 | R006258 | (gi:126437396) prrB (Mjls 4831) - integral membrane sensor signal transduction<br>histidine kinase [Mycobacterium sp. str. JLS]           | 79.72 | 428 | 429 |
| fig 6666666.28482.peg.3086 | R006257 | (gi:120405959) prrB (Mvan 5010) - integral membrane sensor signal transduction<br>histidine kinase [Mycobacterium vanbaalenii str. PYR-1] | 78.52 | 405 | 429 |



|                            |         |                                                                                                                                     |       |     |     |
|----------------------------|---------|-------------------------------------------------------------------------------------------------------------------------------------|-------|-----|-----|
| fig 6666666.28482.peg.3086 | R006256 | (gi:145222333) prrB (Mflv 1743) - integral membrane sensor signal transduction histidine kinase [Mycobacterium gilvum str. PYR-GCK] | 75.29 | 428 | 429 |
| fig 6666666.28482.peg.3086 | R006251 | (gi:41406931) prrB (MAP0833c) - hypothetical protein [Mycobacterium avium str. K-10 (subsp. paratuberculosis)]                      | 80.15 | 388 | 429 |
| fig 6666666.28482.peg.3142 | R006069 | (gi:118465627) katG (MAV 2753) - catalase/peroxidase HPI [Mycobacterium avium str. 104]                                             | 90.59 | 742 | 744 |
| fig 6666666.28482.peg.3142 | R006068 | (gi:41407766) katG (MAP1668c) - KatG [Mycobacterium avium str. K-10 (subsp. paratuberculosis)]                                      | 90.32 | 742 | 744 |
| fig 6666666.28482.peg.3142 | R019170 | (gi:183982917) katG (MMAR 2914) - catalase-peroxidase-peroxynitritase T KatG [Mycobacterium marinum str. M]                         | 84.64 | 742 | 744 |
| fig 6666666.28482.peg.3142 | R006074 | (gi:120404186) katG (Mvan 3208) - catalase/peroxidase HPI [Mycobacterium vanbaalenii str. PYR-1]                                    | 79.36 | 741 | 744 |
| fig 6666666.28482.peg.3142 | R006072 | (gi:145224036) katG (Mflv 3451) - catalase/peroxidase HPI [Mycobacterium gilvum str. PYR-GCK]                                       | 77.78 | 742 | 744 |
| fig 6666666.28482.peg.3142 | R006077 | (gi:108799649) katG (Mmcs 2682) - catalase/peroxidase HPI [Mycobacterium sp. str. MCS]                                              | 77.48 | 742 | 744 |
| fig 6666666.28482.peg.3142 | R006076 | (gi:119868760) katG (Mkms 2727) - catalase/peroxidase HPI [Mycobacterium sp. str. KMS]                                              | 77.48 | 742 | 744 |
| fig 6666666.28482.peg.3142 | R006075 | (gi:126435293) katG (Mjls 2713) - catalase/peroxidase HPI [Mycobacterium sp. str. JLS]                                              | 77.48 | 742 | 744 |
| fig 6666666.28482.peg.3142 | R006070 | (gi:118617734) katG (MUL 2190) - catalase-peroxidase-peroxynitritase T KatG [Mycobacterium ulcerans str. Agy99]                     | 84.89 | 708 | 744 |
| fig 6666666.28482.peg.3142 | R019173 | (gi:340626917) katG (MCAN 19241) - catalase-peroxidase-peroxynitritase T KATG [Mycobacterium canettii str. CIPT 140010059]          | 70.76 | 706 | 744 |
| fig 6666666.28482.peg.3142 | R019175 | (gi:224990298) katG (JTY 1931) - catalase-peroxidase-peroxynitritase T [Mycobacterium bovis str. BCG str. Tokyo 172]                | 70.76 | 706 | 744 |
| fig 6666666.28482.peg.3142 | R006067 | (gi:121637814) katG (BCG 1947c) - Catalase-peroxidase-peroxynitritase T katG [Mycobacterium bovis str. BCG Pasteur 1173P2]          | 70.76 | 706 | 744 |
| fig 6666666.28482.peg.3142 | R006066 | (gi:31793101) katG (Mb1943c) - CATALASE-PEROXIDASE-PEROXYNITRITASE T KATG [Mycobacterium bovis str. AF2122/97]                      | 70.76 | 706 | 744 |
| fig 6666666.28482.peg.3142 | R019172 | (gi:339631961) katG (MAF 19310) - catalase-peroxidase-peroxynitritase T KATG [Mycobacterium africanum str. GM041182]                | 70.76 | 706 | 744 |

|                            |         |                                                                                                                                                                                    |       |     |     |
|----------------------------|---------|------------------------------------------------------------------------------------------------------------------------------------------------------------------------------------|-------|-----|-----|
| fig 6666666.28482.peg.3142 | R006063 | (gi:15609045) katG (Rv1908c) - CATALASE-PEROXIDASE-PEROXYNITRITASE T KATG [Mycobacterium tuberculosis str. H37Rv]                                                                  | 70.62 | 706 | 744 |
| fig 6666666.28482.peg.3142 | R006064 | (gi:148661716) katG (MRA 1919) - catalase-peroxidase [Mycobacterium tuberculosis str. H37Ra]                                                                                       | 70.62 | 706 | 744 |
| fig 6666666.28482.peg.3142 | R006065 | (gi:15841380) katG (MT1959) - catalase-peroxidase [Mycobacterium tuberculosis str. CDC1551]                                                                                        | 70.62 | 706 | 744 |
| fig 6666666.28482.peg.3142 | R019174 | (gi:253799045) katG (TBMG 02084) - catalase-peroxidase-peroxynitritase T katG [Mycobacterium tuberculosis str. KZN 1435]                                                           | 70.48 | 706 | 744 |
| fig 6666666.28482.peg.3142 | R013478 | (gi:148823120) katG (TBFG 11937) - catalase-peroxidase katG [Mycobacterium tuberculosis str. F11]                                                                                  | 70.48 | 706 | 744 |
| fig 6666666.28482.peg.3142 | R019171 | (gi:169629556) katG (MAB 2470c) - catalase/peroxidase (KatG) [Mycobacterium abscessus str. ATCC 19977]                                                                             | 67.23 | 706 | 744 |
| fig 6666666.28482.peg.3142 | R006071 | (gi:118471761) katG (MSMEG 6384) - catalase/peroxidase HPI [Mycobacterium smegmatis str. MC2 155]                                                                                  | 62.4  | 735 | 744 |
| fig 6666666.28482.peg.3245 | R005417 | (gi:118467129) fbpA (MAV 0214) - antigen 85-A [Mycobacterium avium str. 104]                                                                                                       | 92.78 | 291 | 316 |
| fig 6666666.28482.peg.3245 | R005416 | (gi:41406314) fbpA (MAP0216) - FbpA [Mycobacterium avium str. K-10 (subsp. paratuberculosis)]                                                                                      | 92.44 | 291 | 316 |
| fig 6666666.28482.peg.3245 | R018864 | (gi:183985336) fbpA (MMAR 5368) - secreted antigen 85-A FbpA [Mycobacterium marinum str. M]                                                                                        | 87.92 | 298 | 316 |
| fig 6666666.28482.peg.3245 | R005419 | (gi:118620004) fbpA (MUL 4987) - secreted antigen 85-A FbpA [Mycobacterium ulcerans str. Agy99]                                                                                    | 86.91 | 298 | 316 |
| fig 6666666.28482.peg.3245 | R018868 | (gi:253800852) fbpA (TBMG 03851) - secreted fibronectin-binding protein antigen fbpA [Mycobacterium tuberculosis str. KZN 1435]                                                    | 80.59 | 304 | 316 |
| fig 6666666.28482.peg.3245 | R005411 | (gi:15610940) fbpA (Rv3804c) - SECRETED ANTIGEN 85-A FBPA (MYCOLYL TRANSFERASE 85A) (FIBRONECTIN-BINDING PROTEIN A) (ANTIGEN 85 COMPLEX A) [Mycobacterium tuberculosis str. H37Rv] | 80.59 | 304 | 316 |
| fig 6666666.28482.peg.3245 | R005412 | (gi:148663672) fbpA (MRA 3844) - secreted antigen 85-A FbpA [Mycobacterium tuberculosis str. H37Ra]                                                                                | 80.59 | 304 | 316 |
| fig 6666666.28482.peg.3245 | R013424 | (gi:148825011) fbpA (TBFG 13838) - secreted antigen 85-A fbpA (fibronectin-binding protein A) [Mycobacterium tuberculosis str. F11]                                                | 80.59 | 304 | 316 |
| fig 6666666.28482.peg.3245 | R018867 | (gi:340628773) fbpA (MCAN 38231) - secreted antigen 85-A FBPA [Mycobacterium canettii str. CIPT 140010059]                                                                         | 80.59 | 304 | 316 |

|                            |         |                                                                                                                                                                                                                        |       |     |     |
|----------------------------|---------|------------------------------------------------------------------------------------------------------------------------------------------------------------------------------------------------------------------------|-------|-----|-----|
| fig 6666666.28482.peg.3245 | R018869 | (gi:224992216) fbpA (JTY 3868) - secreted antigen 85-A [Mycobacterium bovis str. BCG str. Tokyo 172]                                                                                                                   | 80.59 | 304 | 316 |
| fig 6666666.28482.peg.3245 | R005415 | (gi:121639721) fbpA (BCG 3866c) - Secreted antigen 85-A fbpA [Mycobacterium bovis str. BCG Pasteur 1173P2]                                                                                                             | 80.59 | 304 | 316 |
| fig 6666666.28482.peg.3245 | R005414 | (gi:31794978) fbpA (Mb3834c) - SECRETED ANTIGEN 85-A FBPA (MYCOLYL TRANSFERASE 85A) (FIBRONECTIN-BINDING PROTEIN A) (ANTIGEN 85 COMPLEX A) [Mycobacterium bovis str. AF2122/97]                                        | 80.59 | 304 | 316 |
| fig 6666666.28482.peg.3245 | R005413 | (gi:15843426) fbpA (MT3911) - esterase, putative, antigen 85-A [Mycobacterium tuberculosis str. CDC1551]                                                                                                               | 80.59 | 304 | 316 |
| fig 6666666.28482.peg.3245 | R018866 | (gi:339633799) fbpA (MAF 38190) - secreted antigen 85-A FBPA (mycolyl transferase 85A) [Mycobacterium africanum str. GM041182]                                                                                         | 80.26 | 304 | 316 |
| fig 6666666.28482.peg.3245 | R005426 | (gi:41407707) fbpB (MAP1609c) - FbpB [Mycobacterium avium str. K-10 (subsp. paratuberculosis)]                                                                                                                         | 80.13 | 297 | 316 |
| fig 6666666.28482.peg.3245 | R005427 | (gi:118465697) fbpB (MAV 2816) - antigen 85-B [Mycobacterium avium str. 104]                                                                                                                                           | 80.13 | 297 | 316 |
| fig 6666666.28482.peg.3245 | R018872 | (gi:183982783) fbpB (MMAR 2777) - secreted antigen 85-B FbpB [Mycobacterium marinum str. M]                                                                                                                            | 80.82 | 292 | 316 |
| fig 6666666.28482.peg.3245 | R018875 | (gi:253799070) fbpB (TBMG 02108) - secreted fibronectin-binding protein antigen 85-B fbpB [Mycobacterium tuberculosis str. KZN 1435]                                                                                   | 82.39 | 284 | 316 |
| fig 6666666.28482.peg.3245 | R005421 | (gi:15609023) fbpB (Rv1886c) - SECRETED ANTIGEN 85-B FBPB (85B) (ANTIGEN 85 COMPLEX B) (MYCOLYL TRANSFERASE 85B) (FIBRONECTIN-BINDING PROTEIN B) (EXTRACELLULAR ALPHA-ANTIGEN) [Mycobacterium tuberculosis str. H37Rv] | 82.39 | 284 | 316 |
| fig 6666666.28482.peg.3245 | R005422 | (gi:148661692) fbpB (MRA 1897) - secreted antigen 85-B FbpB [Mycobacterium tuberculosis str. H37Ra]                                                                                                                    | 82.39 | 284 | 316 |
| fig 6666666.28482.peg.3245 | R013425 | (gi:148823097) fbpB (TBFG 11914) - secreted antigen 85-B fbpB (fibronectin-binding protein B) [Mycobacterium tuberculosis str. F11]                                                                                    | 82.39 | 284 | 316 |
| fig 6666666.28482.peg.3245 | R018874 | (gi:340626894) fbpB (MCAN 19011) - secreted antigen 85-B FBPB [Mycobacterium canettii str. CIPT 140010059]                                                                                                             | 82.39 | 284 | 316 |
| fig 6666666.28482.peg.3245 | R005424 | (gi:31793077) fbpB (Mb1918c) - secreted antigen 85-B fbpB (85B) (antigen 85 complex B) (Mycolyl transferase 85B) (Fibronectin-binding protein B) (Extracellular alpha-antigen) [Mycobacterium bovis str. AF2122/97]    | 82.39 | 284 | 316 |

|                            |         |                                                                                                                                   |       |     |     |
|----------------------------|---------|-----------------------------------------------------------------------------------------------------------------------------------|-------|-----|-----|
| fig 6666666.28482.peg.3245 | R018873 | (gi:339631939) fbpB (MAF 19080) - secreted antigen 85-B FBPB (85B) (antigen 85 complex B) [Mycobacterium africanum str. GM041182] | 82.39 | 284 | 316 |
| fig 6666666.28482.peg.3245 | R005423 | (gi:15841356) fbpB (MT1934) - esterase, putative, antigen 85-B [Mycobacterium tuberculosis str. CDC1551]                          | 82.39 | 284 | 316 |
| fig 6666666.28482.peg.3245 | R018876 | (gi:224990274) fbpB (JTY 1907) - secreted antigen 85-B [Mycobacterium bovis str. BCG str. Tokyo 172]                              | 82.04 | 284 | 316 |
| fig 6666666.28482.peg.3245 | R005425 | (gi:121637790) fbpB (BCG 1923c) - secreted antigen 85-B fbpB [Mycobacterium bovis str. BCG Pasteur 1173P2]                        | 82.04 | 284 | 316 |
| fig 6666666.28482.peg.3245 | R005429 | (gi:118618369) fbpB (MUL 2970) - secreted antigen 85-B FbpB [Mycobacterium ulcerans str. Agy99]                                   | 79.45 | 292 | 316 |
| fig 6666666.28482.peg.3245 | R005428 | (gi:15828096) fbpB (ML2028) - antigen 85A, mycolyltransferase [Mycobacterium leprae str. TN]                                      | 79.8  | 297 | 316 |
| fig 6666666.28482.peg.3245 | R018877 | (gi:221230573) fbpB (MLBr 02028) - antigen 85A, mycolyltransferase [Mycobacterium leprae str. Br4923]                             | 79.8  | 297 | 316 |
| fig 6666666.28482.peg.3245 | R005418 | (gi:15826932) fbpA (ML0097) - antigen 85A, mycolyltransferase [Mycobacterium leprae str. TN]                                      | 78.31 | 295 | 316 |
| fig 6666666.28482.peg.3245 | R018870 | (gi:221229410) fbpA (MLBr 00097) - antigen 85A, mycolyltransferase [Mycobacterium leprae str. Br4923]                             | 78.31 | 295 | 316 |
| fig 6666666.28482.peg.3245 | R018878 | (gi:333990613) fbpB (JDM601 1973) - hypothetical protein [Mycobacterium sp. str. JDM601]                                          | 74.5  | 297 | 316 |
| fig 6666666.28482.peg.3245 | R018871 | (gi:333992762) fbpA (JDM601 4122) - hypothetical protein [Mycobacterium sp. str. JDM601]                                          | 72.28 | 302 | 316 |
| fig 6666666.28482.peg.3245 | R005441 | (gi:145221756) fbpC (Mflv 1164) - putative esterase [Mycobacterium gilvum str. PYR-72.15 GCK]                                     | 72.15 | 292 | 316 |
| fig 6666666.28482.peg.3245 | R005444 | (gi:145225038) fbpC (Mflv 4459) - putative esterase [Mycobacterium gilvum str. PYR-72.85 GCK]                                     | 72.85 | 290 | 316 |
| fig 6666666.28482.peg.3245 | R005446 | (gi:120402899) fbpC (Mvan 1902) - putative esterase [Mycobacterium vanbaalenii str. PYR-1]                                        | 71.13 | 290 | 316 |
| fig 6666666.28482.peg.3245 | R005430 | (gi:118473709) fbpB (MSMEG 2078) - antigen 85-C [Mycobacterium smegmatis str. MC2 155]                                            | 70.41 | 292 | 316 |
| fig 6666666.28482.peg.3245 | R005466 | (gi:108801978) fbpC (Mmcs 5015) - putative esterase [Mycobacterium sp. str. MCS]                                                  | 69.02 | 291 | 316 |

|                            |         |                                                                                                                                                                                                  |       |     |     |
|----------------------------|---------|--------------------------------------------------------------------------------------------------------------------------------------------------------------------------------------------------|-------|-----|-----|
| fig 6666666.28482.peg.3245 | R005461 | (gi:119871130) fbpC (Mkms 5103) - putative esterase [Mycobacterium sp. str. KMS]                                                                                                                 | 69.02 | 291 | 316 |
| fig 6666666.28482.peg.3245 | R005456 | (gi:126437959) fbpC (Mjls 5396) - putative esterase [Mycobacterium sp. str. JLS]                                                                                                                 | 69.02 | 291 | 316 |
| fig 6666666.28482.peg.3245 | R005420 | (gi:118468744) fbpA (MSMEG 6398) - antigen 85-A [Mycobacterium smegmatis str. MC2 155]                                                                                                           | 69.77 | 297 | 316 |
| fig 6666666.28482.peg.3245 | R005455 | (gi:126437080) fbpC (Mjls 4511) - putative esterase [Mycobacterium sp. str. JLS]                                                                                                                 | 67.22 | 293 | 316 |
| fig 6666666.28482.peg.3245 | R018882 | (gi:253797048) fbpC (TBMG 00130) - secreted fibronectin-binding protein C antigen 85-C fbpC [Mycobacterium tuberculosis str. KZN 1435]                                                           | 70.1  | 291 | 316 |
| fig 6666666.28482.peg.3245 | R005431 | (gi:57116693) fbpC (Rv0129c) - SECRETED ANTIGEN 85-C FBPC (85C) (ANTIGEN 85 COMPLEX C) (AG58C) (MYCOLYL TRANSFERASE 85C) (FIBRONECTIN-BINDING PROTEIN C) [Mycobacterium tuberculosis str. H37Rv] | 70.1  | 291 | 316 |
| fig 6666666.28482.peg.3245 | R005432 | (gi:148659893) fbpC (MRA 0136) - secreted antigen 86-C FbpC [Mycobacterium tuberculosis str. H37Ra]                                                                                              | 70.1  | 291 | 316 |
| fig 6666666.28482.peg.3245 | R013426 | (gi:148821321) fbpC (TBF 10130) - secreted antigen 85-C fbpC (fibronectin-binding protein C) [Mycobacterium tuberculosis str. F11]                                                               | 70.1  | 291 | 316 |
| fig 6666666.28482.peg.3245 | R018881 | (gi:340625164) fbpC (MCAN 01321) - secreted antigen 85-C FBPC [Mycobacterium canettii str. CIPT 140010059]                                                                                       | 70.1  | 291 | 316 |
| fig 6666666.28482.peg.3245 | R018883 | (gi:224988515) fbpC (JTY 0133) - secreted antigen 85-C [Mycobacterium bovis str. BCG str. Tokyo 172]                                                                                             | 70.1  | 291 | 316 |
| fig 6666666.28482.peg.3245 | R005435 | (gi:121636042) fbpC (BCG 0163c) - Secreted antigen 85-c fbpC (85C) [Mycobacterium bovis str. BCG Pasteur 1173P2]                                                                                 | 70.1  | 291 | 316 |
| fig 6666666.28482.peg.3245 | R005434 | (gi:31791308) fbpC (Mb0134c) - SECRETED ANTIGEN 85-C FBPC (85C) (ANTIGEN 85 COMPLEX C) (AG58C) (MYCOLYL TRANSFERASE 85C) (FIBRONECTIN-BINDING PROTEIN C) [Mycobacterium bovis str. AF2122/97]    | 70.1  | 291 | 316 |
| fig 6666666.28482.peg.3245 | R018880 | (gi:339630211) fbpC (MAF 01290) - secreted antigen 85-C FbpC [Mycobacterium africanum str. GM041182]                                                                                             | 70.1  | 291 | 316 |
| fig 6666666.28482.peg.3245 | R005433 | (gi:15839510) fbpC (MT0137) - esterase, putative, antigen 85-C [Mycobacterium tuberculosis str. CDC1551]                                                                                         | 70.1  | 291 | 316 |

|                            |         |                                                                                                                |       |     |     |
|----------------------------|---------|----------------------------------------------------------------------------------------------------------------|-------|-----|-----|
| fig 6666666.28482.peg.3245 | R005436 | (gi:41409629) fbpC (MAP3531c) - FbpC2 [Mycobacterium avium str. K-10 (subsp. paratuberculosis)]                | 68.28 | 290 | 316 |
| fig 6666666.28482.peg.3245 | R005437 | (gi:118465788) fbpC (MAV 5183) - antigen 85-C [Mycobacterium avium str. 104]                                   | 68.28 | 290 | 316 |
| fig 6666666.28482.peg.3245 | R005439 | (gi:118619846) fbpC (MUL 4793) - secreted antigen 85-C FbpC [Mycobacterium ulcerans str. Agy99]                | 70.21 | 282 | 316 |
| fig 6666666.28482.peg.3245 | R018879 | (gi:183980359) fbpC (MMAR 0328) - secreted antigen 85-C FbpC [Mycobacterium marinum str. M]                    | 70.21 | 282 | 316 |
| fig 6666666.28482.peg.3245 | R018885 | (gi:333992822) fbpC (JDM601 4182) - hypothetical protein [Mycobacterium sp. str. JDM601]                       | 69.31 | 290 | 316 |
| fig 6666666.28482.peg.3245 | R005452 | (gi:126434164) fbpC (Mjls 1566) - putative esterase [Mycobacterium sp. str. JLS]                               | 69.31 | 290 | 316 |
| fig 6666666.28482.peg.3245 | R005438 | (gi:15828432) fbpC (ML2655) - secreted antigen 85A, mycolyltransferase [Mycobacterium leprae str. TN]          | 65.64 | 291 | 316 |
| fig 6666666.28482.peg.3245 | R018884 | (gi:221230909) fbpC (MLBr 02655) - secreted antigen 85A, mycolyltransferase [Mycobacterium leprae str. Br4923] | 65.64 | 291 | 316 |
| fig 6666666.28482.peg.3245 | R005462 | (gi:108798566) fbpC (Mmcs 1596) - putative esterase [Mycobacterium sp. str. MCS]                               | 68.97 | 290 | 316 |
| fig 6666666.28482.peg.3245 | R005457 | (gi:119867665) fbpC (Mkms 1620) - putative esterase [Mycobacterium sp. str. KMS]                               | 68.97 | 290 | 316 |
| fig 6666666.28482.peg.3245 | R005440 | (gi:118467737) fbpC (MSMEG 3580) - antigen 85-C [Mycobacterium smegmatis str. MC2 155]                         | 65.32 | 292 | 316 |
| fig 6666666.28482.peg.3245 | R005448 | (gi:120404040) fbpC (Mvan 3061) - putative esterase [Mycobacterium vanbaalenii str. PYR-1]                     | 64.65 | 292 | 316 |
| fig 6666666.28482.peg.3245 | R005443 | (gi:145223921) fbpC (Mflv 3335) - putative esterase [Mycobacterium gilvum str. PYR-63.97 GCK]                  | 63.97 | 292 | 316 |
| fig 6666666.28482.peg.3245 | R005464 | (gi:108799739) fbpC (Mmcs 2773) - putative esterase [Mycobacterium sp. str. MCS]                               | 63.64 | 292 | 316 |
| fig 6666666.28482.peg.3245 | R005459 | (gi:119868849) fbpC (Mkms 2817) - putative esterase [Mycobacterium sp. str. KMS]                               | 63.64 | 292 | 316 |
| fig 6666666.28482.peg.3245 | R005454 | (gi:126435380) fbpC (Mjls 2800) - putative esterase [Mycobacterium sp. str. JLS]                               | 63.64 | 292 | 316 |

|                            |         |                                                                                                                                  |       |     |     |
|----------------------------|---------|----------------------------------------------------------------------------------------------------------------------------------|-------|-----|-----|
| fig 6666666.28482.peg.3245 | R005458 | (gi:119867920) fbpC (Mkms 1882) - putative esterase [Mycobacterium sp. str. KMS]                                                 | 63.48 | 292 | 316 |
| fig 6666666.28482.peg.3245 | R018865 | (gi:169627281) fbpA (MAB 0176) - antigen 85-A precursor [Mycobacterium abscessus str. ATCC 19977]                                | 61.87 | 291 | 316 |
| fig 6666666.28482.peg.3245 | R005453 | (gi:126434404) fbpC (Mjls 1816) - putative esterase [Mycobacterium sp. str. JLS]                                                 | 63.14 | 292 | 316 |
| fig 6666666.28482.peg.3245 | R005442 | (gi:145223828) fbpC (Mflv 3241) - putative esterase [Mycobacterium gilvum str. PYR-GCK]                                          | 61.3  | 291 | 316 |
| fig 6666666.28482.peg.3245 | R005447 | (gi:120403937) fbpC (Mvan 2954) - putative esterase [Mycobacterium vanbaalenii str. PYR-1]                                       | 61.43 | 292 | 316 |
| fig 6666666.28482.peg.3275 | R005651 | (gi:145223363) kasB (Mflv 2776) - beta-ketoacyl synthase [Mycobacterium gilvum str. PYR-GCK]                                     | 65.55 | 416 | 416 |
| fig 6666666.28482.peg.3275 | R005652 | (gi:120404716) kasB (Mvan 3757) - beta-ketoacyl synthase [Mycobacterium vanbaalenii str. PYR-1]                                  | 65.07 | 416 | 416 |
| fig 6666666.28482.peg.3275 | R005648 | (gi:15827874) kasB (ML1656) - 3-oxoacyl-(acyl carrier protein) synthase [Mycobacterium leprae str. TN]                           | 64.83 | 415 | 416 |
| fig 6666666.28482.peg.3275 | R018920 | (gi:221230351) kasB (MLBr 01656) - 3-oxoacyl-(acyl carrier protein) synthase II [Mycobacterium leprae str. Br4923]               | 64.83 | 415 | 416 |
| fig 6666666.28482.peg.3275 | R005643 | (gi:15841739) kasB (MT2306) - 3-oxoacyl-(acyl carrier protein) synthase [Mycobacterium tuberculosis str. CDC1551]                | 66.18 | 406 | 416 |
| fig 6666666.28482.peg.3275 | R018918 | (gi:253798686) kasB (TBMG 01734) - 3-oxoacyl-(acyl carrier protein) synthase II [Mycobacterium tuberculosis str. KZN 1435]       | 66.18 | 406 | 416 |
| fig 6666666.28482.peg.3275 | R005641 | (gi:15609383) kasB (Rv2246) - 3-oxoacyl-(acyl carrier protein) synthase [Mycobacterium tuberculosis str. H37Rv]                  | 66.18 | 406 | 416 |
| fig 6666666.28482.peg.3275 | R005642 | (gi:148662067) kasB (MRA 2266) - 3-oxoacyl-(acyl-carrier-protein) synthase 2 KasB [Mycobacterium tuberculosis str. H37Ra]        | 66.18 | 406 | 416 |
| fig 6666666.28482.peg.3275 | R013442 | (gi:148823454) kasB (TBFG 12275) - 3-oxoacyl-[acyl-carrier protein] synthase 2 kasB [Mycobacterium tuberculosis str. F11]        | 66.18 | 406 | 416 |
| fig 6666666.28482.peg.3275 | R018917 | (gi:340627250) kasB (MCAN 22681) - 3-oxoacyl-[acyl-carrier protein] synthase 2 KASB [Mycobacterium canettii str. CIPT 140010059] | 66.18 | 406 | 416 |
| fig 6666666.28482.peg.3275 | R018919 | (gi:224990622) kasB (JTY 2257) - 3-oxoacyl-(acyl carrier protein) synthase II [Mycobacterium bovis str. BCG str. Tokyo 172]      | 66.18 | 406 | 416 |

|                            |         |                                                                                                                                                         |       |     |     |
|----------------------------|---------|---------------------------------------------------------------------------------------------------------------------------------------------------------|-------|-----|-----|
| fig 6666666.28482.peg.3275 | R005645 | (gi:121638128) kasB (BCG 2263) - 3-oxoacyl-[acyl-carrier protein] synthase 2 kasB [Mycobacterium bovis str. BCG Pasteur 1173P2]                         | 66.18 | 406 | 416 |
| fig 6666666.28482.peg.3275 | R005644 | (gi:31793426) kasB (Mb2270) - 3-oxoacyl-(acyl carrier protein) synthase [Mycobacterium bovis str. AF2122/97]                                            | 66.18 | 406 | 416 |
| fig 6666666.28482.peg.3275 | R018916 | (gi:339632272) kasB (MAF 22570) - 3-oxoacyl-[acyl-carrier protein] synthase 2 KASB (beta-ketoacyl-ACP synthase) [Mycobacterium africanum str. GM041182] | 66.18 | 406 | 416 |
| fig 6666666.28482.peg.3275 | R005655 | (gi:108800333) kasB (Mmcs 3367) - beta-ketoacyl synthase [Mycobacterium sp. str. MCS]                                                                   | 63.16 | 416 | 416 |
| fig 6666666.28482.peg.3275 | R005654 | (gi:119869461) kasB (Mkms 3429) - beta-ketoacyl synthase [Mycobacterium sp. str. KMS]                                                                   | 63.16 | 416 | 416 |
| fig 6666666.28482.peg.3275 | R005653 | (gi:126435956) kasB (Mjls 3378) - beta-ketoacyl synthase [Mycobacterium sp. str. JLS]                                                                   | 63.16 | 416 | 416 |
| fig 6666666.28482.peg.3275 | R005649 | (gi:118617002) kasB (MUL 1303) - 3-oxoacyl-[acyl-carrier protein] synthase 2 KasB [Mycobacterium ulcerans str. Agy99]                                   | 64.22 | 406 | 416 |
| fig 6666666.28482.peg.3275 | R018915 | (gi:183983329) kasB (MMAR 3339) - 3-oxoacyl-(acyl carrier protein) synthase II [Mycobacterium marinum str. M]                                           | 64.22 | 406 | 416 |
| fig 6666666.28482.peg.3275 | R005650 | (gi:118467655) kasB (MSMEG 4328) - 3-oxoacyl-[acyl-carrier-protein] synthase 2 [Mycobacterium smegmatis str. MC2 155]                                   | 63.16 | 416 | 416 |
| fig 6666666.28482.peg.3275 | R005646 | (gi:41408097) kasB (MAP1999) - 3-oxoacyl-(acyl carrier protein) synthase [Mycobacterium avium str. K-10 (subsp. paratuberculosis)]                      | 64.3  | 405 | 416 |
| fig 6666666.28482.peg.3275 | R005647 | (gi:118465046) kasB (MAV 2191) - 3-oxoacyl-[acyl-carrier-protein] synthase 2 [Mycobacterium avium str. 104]                                             | 64.13 | 403 | 416 |
| fig 6666666.28482.peg.3275 | R018921 | (gi:333990667) kasB (JDM601 2027) - 3-oxoacyl-(acyl carrier protein) synthase II [Mycobacterium sp. str. JDM601]                                        | 61.72 | 416 | 416 |
| fig 6666666.28482.peg.3275 | R018922 | (gi:333990289) kasB (JDM601 1649) - 3-oxoacyl-(acyl carrier protein) synthase II [Mycobacterium sp. str. JDM601]                                        | 62.69 | 395 | 416 |
| fig 6666666.28482.peg.3276 | R005643 | (gi:15841739) kasB (MT2306) - 3-oxoacyl-(acyl carrier protein) synthase [Mycobacterium tuberculosis str. CDC1551]                                       | 92.57 | 404 | 404 |
| fig 6666666.28482.peg.3276 | R018918 | (gi:253798686) kasB (TBMG 01734) - 3-oxoacyl-(acyl carrier protein) synthase II [Mycobacterium tuberculosis str. KZN 1435]                              | 92.57 | 404 | 404 |
| fig 6666666.28482.peg.3276 | R005641 | (gi:15609383) kasB (Rv2246) - 3-oxoacyl-(acyl carrier protein) synthase [Mycobacterium tuberculosis str. H37Rv]                                         | 92.57 | 404 | 404 |



|                            |         |                                                                                                                                                         |       |     |     |
|----------------------------|---------|---------------------------------------------------------------------------------------------------------------------------------------------------------|-------|-----|-----|
| fig 6666666.28482.peg.3276 | R005642 | (gi:148662067) kasB (MRA 2266) - 3-oxoacyl-(acyl-carrier-protein) synthase 2 KasB [Mycobacterium tuberculosis str. H37Ra]                               | 92.57 | 404 | 404 |
| fig 6666666.28482.peg.3276 | R013442 | (gi:148823454) kasB (TBFG 12275) - 3-oxoacyl-[acyl-carrier protein] synthase 2 kasB [Mycobacterium tuberculosis str. F11]                               | 92.57 | 404 | 404 |
| fig 6666666.28482.peg.3276 | R018917 | (gi:340627250) kasB (MCAN 22681) - 3-oxoacyl-[acyl-carrier protein] synthase 2 KASB [Mycobacterium canettii str. CIPT 140010059]                        | 92.57 | 404 | 404 |
| fig 6666666.28482.peg.3276 | R018919 | (gi:224990622) kasB (JTY 2257) - 3-oxoacyl-(acyl carrier protein) synthase II [Mycobacterium bovis str. BCG str. Tokyo 172]                             | 92.57 | 404 | 404 |
| fig 6666666.28482.peg.3276 | R005645 | (gi:121638128) kasB (BCG 2263) - 3-oxoacyl-[acyl-carrier protein] synthase 2 kasB [Mycobacterium bovis str. BCG Pasteur 1173P2]                         | 92.57 | 404 | 404 |
| fig 6666666.28482.peg.3276 | R005644 | (gi:31793426) kasB (Mb2270) - 3-oxoacyl-(acyl carrier protein) synthase [Mycobacterium bovis str. AF2122/97]                                            | 92.57 | 404 | 404 |
| fig 6666666.28482.peg.3276 | R018916 | (gi:339632272) kasB (MAF 22570) - 3-oxoacyl-[acyl-carrier protein] synthase 2 KASB (beta-ketoacyl-ACP synthase) [Mycobacterium africanum str. GM041182] | 92.57 | 404 | 404 |
| fig 6666666.28482.peg.3276 | R005649 | (gi:118617002) kasB (MUL 1303) - 3-oxoacyl-[acyl-carrier protein] synthase 2 KasB [Mycobacterium ulcerans str. Agy99]                                   | 89.6  | 404 | 404 |
| fig 6666666.28482.peg.3276 | R018915 | (gi:183983329) kasB (MMAR 3339) - 3-oxoacyl-(acyl carrier protein) synthase II [Mycobacterium marinum str. M]                                           | 89.6  | 404 | 404 |
| fig 6666666.28482.peg.3276 | R005648 | (gi:15827874) kasB (ML1656) - 3-oxoacyl-(acyl carrier protein) synthase [Mycobacterium leprae str. TN]                                                  | 88.37 | 404 | 404 |
| fig 6666666.28482.peg.3276 | R018920 | (gi:221230351) kasB (MLBr 01656) - 3-oxoacyl-(acyl carrier protein) synthase II [Mycobacterium leprae str. Br4923]                                      | 88.37 | 404 | 404 |
| fig 6666666.28482.peg.3276 | R005647 | (gi:118465046) kasB (MAV 2191) - 3-oxoacyl-[acyl-carrier-protein] synthase 2 [Mycobacterium avium str. 104]                                             | 86.95 | 404 | 404 |
| fig 6666666.28482.peg.3276 | R005646 | (gi:41408097) kasB (MAP1999) - 3-oxoacyl-(acyl carrier protein) synthase [Mycobacterium avium str. K-10 (subsp. paratuberculosis)]                      | 86.95 | 404 | 404 |
| fig 6666666.28482.peg.3276 | R005655 | (gi:108800333) kasB (Mmcs 3367) - beta-ketoacyl synthase [Mycobacterium sp. str. MCS]                                                                   | 84.41 | 404 | 404 |
| fig 6666666.28482.peg.3276 | R005654 | (gi:119869461) kasB (Mkms 3429) - beta-ketoacyl synthase [Mycobacterium sp. str. KMS]                                                                   | 84.41 | 404 | 404 |
| fig 6666666.28482.peg.3276 | R005653 | (gi:126435956) kasB (Mjls 3378) - beta-ketoacyl synthase [Mycobacterium sp. str. JLS]                                                                   | 84.41 | 404 | 404 |

|                            |         |                                                                                                                       |       |     |     |
|----------------------------|---------|-----------------------------------------------------------------------------------------------------------------------|-------|-----|-----|
| fig 6666666.28482.peg.3276 | R005651 | (gi:145223363) kasB (Mflv 2776) - beta-ketoacyl synthase [Mycobacterium gilvum str. PYR-GCK]                          | 82.43 | 404 | 404 |
| fig 6666666.28482.peg.3276 | R005652 | (gi:120404716) kasB (Mvan 3757) - beta-ketoacyl synthase [Mycobacterium vanbaalenii str. PYR-1]                       | 82.18 | 404 | 404 |
| fig 6666666.28482.peg.3276 | R005650 | (gi:118467655) kasB (MSMEG 4328) - 3-oxoacyl-[acyl-carrier-protein] synthase 2 [Mycobacterium smegmatis str. MC2 155] | 81.44 | 404 | 404 |
| fig 6666666.28482.peg.3276 | R018922 | (gi:333990289) kasB (JDM601 1649) - 3-oxoacyl-(acyl carrier protein) synthase II [Mycobacterium sp. str. JDM601]      | 79.16 | 398 | 404 |
| fig 6666666.28482.peg.3276 | R018921 | (gi:333990667) kasB (JDM601 2027) - 3-oxoacyl-(acyl carrier protein) synthase II [Mycobacterium sp. str. JDM601]      | 77.48 | 404 | 404 |
| fig 6666666.28482.peg.3423 | R018631 | (gi:126436732) Mjls4160 - cytochrome P450 [Mycobacterium sp. str. JLS]                                                | 69.43 | 350 | 352 |
| fig 6666666.28482.peg.3423 | R019850 | (gi:253799175) TBMG02212 - cytochrome P450 143 cyp143 [Mycobacterium tuberculosis str. KZN 1435]                      | 60.11 | 351 | 352 |
| fig 6666666.28482.peg.3423 | R018622 | (gi:15608923) cyp143 (Rv1785c) - cytochrome P450 143 [Mycobacterium tuberculosis str. H37Rv]                          | 60.11 | 351 | 352 |
| fig 6666666.28482.peg.3423 | R018623 | (gi:148661592) cyp143 (MRA 1799) - putative cytochrome p450 143 CYP143 [Mycobacterium tuberculosis str. H37Ra]        | 60.11 | 351 | 352 |
| fig 6666666.28482.peg.3423 | R018621 | (gi:148823000) TBF11815 - cytochrome P450 143 cyp143 [Mycobacterium tuberculosis str. F11]                            | 60.11 | 351 | 352 |
| fig 6666666.28482.peg.3423 | R019851 | (gi:224990170) cyp143 (JTY 1801) - putative cytochrome P450 143 [Mycobacterium bovis str. BCG str. Tokyo 172]         | 60.11 | 351 | 352 |
| fig 6666666.28482.peg.3423 | R018626 | (gi:121637686) cyp143 (BCG 1817c) - putative cytochrome P450 143 cyp143 [Mycobacterium bovis str. BCG Pasteur 1173P2] | 60.11 | 351 | 352 |
| fig 6666666.28482.peg.3423 | R018625 | (gi:31792973) cyp143 (Mb1813c) - cytochrome P450 143 [Mycobacterium bovis str. AF2122/97]                             | 60.11 | 351 | 352 |
| fig 6666666.28482.peg.3423 | R019848 | (gi:339631839) cyp143 (MAF 18070) - putative cytochrome P450 143 CYP143 [Mycobacterium africanum str. GM041182]       | 60.11 | 351 | 352 |
| fig 6666666.28482.peg.3423 | R019849 | (gi:340626797) cyp143 (MCAN 18031) - putative cytochrome P450 143 CYP143 [Mycobacterium canettii str. CIPT 140010059] | 60.11 | 351 | 352 |
| fig 6666666.28482.peg.3423 | R018624 | (gi:15841253) MT1834 - P450 heme-thiolate protein [Mycobacterium tuberculosis str. CDC1551]                           | 60.11 | 351 | 352 |

|                            |         |                                                                                                               |       |     |     |
|----------------------------|---------|---------------------------------------------------------------------------------------------------------------|-------|-----|-----|
| fig 6666666.28482.peg.3538 | R006595 | (gi:118464917) mce3F (MAV 2537) - virulence factor mce family protein [Mycobacterium avium str. 104]          | 80.45 | 491 | 492 |
| fig 6666666.28482.peg.3538 | R006607 | (gi:126436737) mce3F (Mjls 4165) - virulence factor Mce family protein [Mycobacterium sp. str. JLS]           | 63.39 | 486 | 492 |
| fig 6666666.28482.peg.3538 | R006597 | (gi:118619132) mce3F (MUL 3923) - MCE-family protein Mce3F 1 [Mycobacterium ulcerans str. Agy99]              | 63.66 | 487 | 492 |
| fig 6666666.28482.peg.3538 | R019408 | (gi:183984027) mce3F (MMAR 4056) - MCE-family protein Mce3F 1 [Mycobacterium marinum str. M]                  | 63.66 | 487 | 492 |
| fig 6666666.28482.peg.3538 | R006599 | (gi:145222694) mce3F (Mflv 2106) - virulence factor Mce family protein [Mycobacterium gilvum str. PYR-GCK]    | 61.96 | 489 | 492 |
| fig 6666666.28482.peg.3538 | R019407 | (gi:183982891) mce3F (MMAR 2887) - MCE-family protein Mce3F [Mycobacterium marinum str. M]                    | 61.52 | 486 | 492 |
| fig 6666666.28482.peg.3538 | R006606 | (gi:120405551) mce3F (Mvan 4599) - virulence factor Mce family protein [Mycobacterium vanbaalenii str. PYR-1] | 61    | 486 | 492 |
| fig 6666666.28482.peg.3538 | R006603 | (gi:120404931) mce3F (Mvan 3977) - virulence factor Mce family protein [Mycobacterium vanbaalenii str. PYR-1] | 61.73 | 486 | 492 |
| fig 6666666.28482.peg.3538 | R006609 | (gi:126436755) mce3F (Mjls 4183) - virulence factor Mce family protein [Mycobacterium sp. str. JLS]           | 61.93 | 486 | 492 |
| fig 6666666.28482.peg.3538 | R006593 | (gi:15841446) mce3F (MT2023) - virulence factor mce family protein [Mycobacterium tuberculosis str. CDC1551]  | 61.5  | 422 | 492 |
| fig 6666666.28482.peg.3538 | R019409 | (gi:340626980) mce3F (MCAN 19871) - MCE-family protein MCE3F [Mycobacterium canettii str. CIPT 140010059]     | 61.5  | 422 | 492 |
| fig 6666666.28482.peg.3538 | R006591 | (gi:15609108) mce3F (Rv1971) - MCE-FAMILY PROTEIN MCE3F [Mycobacterium tuberculosis str. H37Rv]               | 61.5  | 422 | 492 |
| fig 6666666.28482.peg.3538 | R006592 | (gi:148661780) mce3F (MRA 1982) - MCE-family protein Mce3F [Mycobacterium tuberculosis str. H37Ra]            | 61.5  | 422 | 492 |
| fig 6666666.28482.peg.3538 | R019410 | (gi:253798981) mce3F (TBMG 02019) - MCE-family protein mce3F [Mycobacterium tuberculosis str. KZN 1435]       | 61.27 | 422 | 492 |
| fig 6666666.28482.peg.3538 | R013529 | (gi:148823185) mce3F (TBFG 12002) - MCE-family protein mce3F [Mycobacterium tuberculosis str. F11]            | 61.27 | 422 | 492 |
| fig 6666666.28482.peg.3539 | R006572 | (gi:118463194) mce3E (MAV 2536) - virulence factor Mce family protein [Mycobacterium avium str. 104]          | 80.66 | 362 | 385 |

|                            |         |                                                                                                                                            |       |     |     |
|----------------------------|---------|--------------------------------------------------------------------------------------------------------------------------------------------|-------|-----|-----|
| fig 6666666.28482.peg.3539 | R006584 | (gi:126436738) mce3E (Mjls 4166) - transcriptional regulator, Fis family [Mycobacterium sp. str. JLS]                                      | 66.84 | 382 | 385 |
| fig 6666666.28482.peg.3539 | R019403 | (gi:183982890) mce3E (MMAR 2886) - MCE family lipoprotein LprM [Mycobacterium marinum str. M]                                              | 65.36 | 383 | 385 |
| fig 6666666.28482.peg.3539 | R006574 | (gi:118619131) mce3E (MUL 3922) - MCE-family lipoprotein LprM 1 [Mycobacterium ulcerans str. Agy99]                                        | 67.03 | 363 | 385 |
| fig 6666666.28482.peg.3539 | R019404 | (gi:183984026) mce3E (MMAR 4055) - MCE family lipoprotein LprM [Mycobacterium marinum str. M]                                              | 66.76 | 363 | 385 |
| fig 6666666.28482.peg.3539 | R006586 | (gi:126436756) mce3E (Mjls 4184) - virulence factor Mce family protein [Mycobacterium sp. str. JLS]                                        | 64.08 | 385 | 385 |
| fig 6666666.28482.peg.3539 | R006578 | (gi:120401538) mce3E (Mvan 0517) - virulence factor Mce family protein [Mycobacterium vanbaalenii str. PYR-1]                              | 63.61 | 381 | 385 |
| fig 6666666.28482.peg.3539 | R006590 | (gi:108798627) mce3E (Mmcs 1658) - Mammalian cell entry [Mycobacterium sp. str. MCS]                                                       | 63.61 | 381 | 385 |
| fig 6666666.28482.peg.3539 | R006588 | (gi:119867723) mce3E (Mkms 1682) - virulence factor Mce family protein [Mycobacterium sp. str. KMS]                                        | 63.61 | 381 | 385 |
| fig 6666666.28482.peg.3539 | R006585 | (gi:126434224) mce3E (Mjls 1631) - virulence factor Mce family protein [Mycobacterium sp. str. JLS]                                        | 63.61 | 381 | 385 |
| fig 6666666.28482.peg.3539 | R006577 | (gi:145221247) mce3E (Mflv 0648) - virulence factor Mce family protein [Mycobacterium gilvum str. PYR-GCK]                                 | 63.35 | 381 | 385 |
| fig 6666666.28482.peg.3539 | R006583 | (gi:120405552) mce3E (Mvan 4600) - virulence factor Mce family protein [Mycobacterium vanbaalenii str. PYR-1]                              | 65.68 | 372 | 385 |
| fig 6666666.28482.peg.3539 | R019405 | (gi:340626979) mce3E (MCAN 19861) - putative MCE-family lipoprotein LPRM [Mycobacterium canettii str. CIPT 140010059]                      | 63.93 | 376 | 385 |
| fig 6666666.28482.peg.3539 | R019406 | (gi:253798982) mce3E (TBMG 02020) - MCE-family lipoprotein mce3E [Mycobacterium tuberculosis str. KZN 1435]                                | 63.66 | 376 | 385 |
| fig 6666666.28482.peg.3539 | R006568 | (gi:15609107) mce3E (Rv1970) - POSSIBLE MCE-FAMILY LIPOPROTEIN LPRM (MCE-FAMILY LIPOPROTEIN MCE3E) [Mycobacterium tuberculosis str. H37Rv] | 63.66 | 376 | 385 |
| fig 6666666.28482.peg.3539 | R006569 | (gi:148661779) mce3E (MRA 1981) - MCE-family lipoprotein LprM [Mycobacterium tuberculosis str. H37Ra]                                      | 63.66 | 376 | 385 |
| fig 6666666.28482.peg.3539 | R013528 | (gi:148823184) mce3E (TBFG 12001) - MCE-family lipoprotein lprM (MCE-family lipoprotein mce3e) [Mycobacterium tuberculosis str. F11]       | 63.66 | 376 | 385 |

|                            |         |                                                                                                                |       |     |     |
|----------------------------|---------|----------------------------------------------------------------------------------------------------------------|-------|-----|-----|
| fig 6666666.28482.peg.3539 | R006570 | (gi:15841445) mce3E (MT2022) - virulence factor mce family protein [Mycobacterium tuberculosis str. CDC1551]   | 63.66 | 376 | 385 |
| fig 6666666.28482.peg.3539 | R006576 | (gi:145222693) mce3E (Mflv 2105) - virulence factor Mce family protein [Mycobacterium gilvum str. PYR-GCK]     | 63.8  | 384 | 385 |
| fig 6666666.28482.peg.3539 | R006581 | (gi:120401941) mce3E (Mvan 0926) - virulence factor Mce family protein [Mycobacterium vanbaalenii str. PYR-1]  | 60.89 | 381 | 385 |
| fig 6666666.28482.peg.3539 | R006579 | (gi:120401392) mce3E (Mvan 0367) - virulence factor Mce family protein [Mycobacterium vanbaalenii str. PYR-1]  | 61.01 | 376 | 385 |
| fig 6666666.28482.peg.3539 | R006575 | (gi:118468700) mce3E (MSMEG 0350) - virulence factor Mce family protein [Mycobacterium smegmatis str. MC2 155] | 61.68 | 367 | 385 |
| fig 6666666.28482.peg.3540 | R006549 | (gi:118466668) mce3D (MAV 2535) - virulence factor mce family protein [Mycobacterium avium str. 104]           | 74.72 | 436 | 436 |
| fig 6666666.28482.peg.3540 | R006561 | (gi:126436739) mce3D (Mjls 4167) - virulence factor Mce family protein [Mycobacterium sp. str. JLS]            | 65.07 | 435 | 436 |
| fig 6666666.28482.peg.3540 | R019399 | (gi:183982889) mce3D (MMAR 2885) - MCE-family protein Mce3D [Mycobacterium marinum str. M]                     | 61.84 | 435 | 436 |
| fig 6666666.28482.peg.3540 | R006545 | (gi:15609106) mce3D (Rv1969) - MCE-FAMILY PROTEIN MCE3D [Mycobacterium tuberculosis str. H37Rv]                | 61.2  | 433 | 436 |
| fig 6666666.28482.peg.3540 | R006546 | (gi:148661778) mce3D (MRA 1980) - MCE-family protein Mce3D [Mycobacterium tuberculosis str. H37Ra]             | 61.2  | 433 | 436 |
| fig 6666666.28482.peg.3540 | R013527 | (gi:148823183) mce3D (TBFG 12000) - MCE-family protein mce3D [Mycobacterium tuberculosis str. F11]             | 61.2  | 433 | 436 |
| fig 6666666.28482.peg.3540 | R006547 | (gi:15841444) mce3D (MT2021) - virulence factor mce family protein [Mycobacterium tuberculosis str. CDC1551]   | 61.2  | 433 | 436 |
| fig 6666666.28482.peg.3540 | R019402 | (gi:253798983) mce3D (TBMG 02021) - MCE-family protein mce3D [Mycobacterium tuberculosis str. KZN 1435]        | 61.2  | 433 | 436 |
| fig 6666666.28482.peg.3540 | R006551 | (gi:118619130) mce3D (MUL 3921) - MCE-family protein Mce3D 1 [Mycobacterium ulcerans str. Agy99]               | 64.23 | 411 | 436 |
| fig 6666666.28482.peg.3540 | R019401 | (gi:340626978) mce3D (MCAN 19851) - MCE-family protein MCE3D [Mycobacterium canettii str. CIPT 140010059]      | 60.97 | 433 | 436 |
| fig 6666666.28482.peg.3540 | R006566 | (gi:108798497) mce3D (Mmcs 1527) - Mammalian cell entry [Mycobacterium sp. str. MCS]                           | 60.69 | 435 | 436 |

|                            |         |                                                                                                               |       |     |     |
|----------------------------|---------|---------------------------------------------------------------------------------------------------------------|-------|-----|-----|
| fig 6666666.28482.peg.3540 | R006564 | (gi:119867597) mce3D (Mkms 1550) - virulence factor Mce family protein [Mycobacterium sp. str. KMS]           | 60.69 | 435 | 436 |
| fig 6666666.28482.peg.3540 | R019400 | (gi:183984025) mce3D (MMAR 4054) - MCE-family protein Mce3D 1 [Mycobacterium marinum str. M]                  | 63.13 | 411 | 436 |
| fig 6666666.28482.peg.3540 | R006553 | (gi:145222692) mce3D (Mflv 2104) - virulence factor Mce family protein [Mycobacterium gilvum str. PYR-GCK]    | 60.61 | 411 | 436 |
| fig 6666666.28482.peg.3540 | R006555 | (gi:120401537) mce3D (Mvan 0516) - virulence factor Mce family protein [Mycobacterium vanbaalenii str. PYR-1] | 60.45 | 435 | 436 |
| fig 6666666.28482.peg.3540 | R006567 | (gi:108798626) mce3D (Mmcs 1657) - Mammalian cell entry [Mycobacterium sp. str. MCS]                          | 60.45 | 435 | 436 |
| fig 6666666.28482.peg.3540 | R006565 | (gi:119867722) mce3D (Mkms 1681) - virulence factor Mce family protein [Mycobacterium sp. str. KMS]           | 60.45 | 435 | 436 |
| fig 6666666.28482.peg.3540 | R006562 | (gi:126434223) mce3D (Mjls 1630) - virulence factor Mce family protein [Mycobacterium sp. str. JLS]           | 60.45 | 435 | 436 |
| fig 6666666.28482.peg.3540 | R006554 | (gi:145221248) mce3D (Mflv 0649) - virulence factor Mce family protein [Mycobacterium gilvum str. PYR-GCK]    | 60.45 | 435 | 436 |
| fig 6666666.28482.peg.3540 | R006560 | (gi:120405553) mce3D (Mvan 4601) - virulence factor Mce family protein [Mycobacterium vanbaalenii str. PYR-1] | 65.27 | 357 | 436 |
| fig 6666666.28482.peg.3540 | R006556 | (gi:120401391) mce3D (Mvan 0366) - virulence factor Mce family protein [Mycobacterium vanbaalenii str. PYR-1] | 62.02 | 413 | 436 |
| fig 6666666.28482.peg.3541 | R006526 | (gi:118463925) mce3C (MAV 2534) - virulence factor Mce family protein [Mycobacterium avium str. 104]          | 79.3  | 401 | 469 |
| fig 6666666.28482.peg.3541 | R006538 | (gi:126436740) mce3C (Mjls 4168) - virulence factor Mce family protein [Mycobacterium sp. str. JLS]           | 71.84 | 380 | 469 |
| fig 6666666.28482.peg.3541 | R019396 | (gi:183984024) mce3C (MMAR 4053) - MCE-family protein, Mce3C 1 [Mycobacterium marinum str. M]                 | 68.33 | 401 | 469 |
| fig 6666666.28482.peg.3541 | R006537 | (gi:120405554) mce3C (Mvan 4602) - virulence factor Mce family protein [Mycobacterium vanbaalenii str. PYR-1] | 67.72 | 441 | 469 |
| fig 6666666.28482.peg.3541 | R006530 | (gi:145222691) mce3C (Mflv 2103) - virulence factor Mce family protein [Mycobacterium gilvum str. PYR-GCK]    | 68.33 | 400 | 469 |
| fig 6666666.28482.peg.3541 | R006540 | (gi:126436758) mce3C (Mjls 4186) - virulence factor Mce family protein [Mycobacterium sp. str. JLS]           | 67.89 | 380 | 469 |

|                            |         |                                                                                                               |       |     |     |
|----------------------------|---------|---------------------------------------------------------------------------------------------------------------|-------|-----|-----|
| fig 6666666.28482.peg.3541 | R006528 | (gi:118619129) mce3C (MUL 3920) - MCE-family protein, Mce3C 1 [Mycobacterium ulcerans str. Agy99]             | 67.33 | 401 | 469 |
| fig 6666666.28482.peg.3541 | R006532 | (gi:120401536) mce3C (Mvan 0515) - virulence factor Mce family protein [Mycobacterium vanbaalenii str. PYR-1] | 65.25 | 400 | 469 |
| fig 6666666.28482.peg.3541 | R006544 | (gi:108798625) mce3C (Mmcs 1656) - Mammalian cell entry [Mycobacterium sp. str. MCS]                          | 65.25 | 400 | 469 |
| fig 6666666.28482.peg.3541 | R006542 | (gi:119867721) mce3C (Mkms 1680) - virulence factor Mce family protein [Mycobacterium sp. str. KMS]           | 65.25 | 400 | 469 |
| fig 6666666.28482.peg.3541 | R006539 | (gi:126434222) mce3C (Mjls 1629) - virulence factor Mce family protein [Mycobacterium sp. str. JLS]           | 65.25 | 400 | 469 |
| fig 6666666.28482.peg.3541 | R006531 | (gi:145221249) mce3C (Mflv 0650) - virulence factor Mce family protein [Mycobacterium gilvum str. PYR-GCK]    | 65.25 | 400 | 469 |
| fig 6666666.28482.peg.3541 | R006543 | (gi:108798496) mce3C (Mmcs 1526) - Mammalian cell entry [Mycobacterium sp. str. MCS]                          | 65.19 | 450 | 469 |
| fig 6666666.28482.peg.3541 | R006541 | (gi:119867596) mce3C (Mkms 1549) - virulence factor Mce family protein [Mycobacterium sp. str. KMS]           | 65.19 | 450 | 469 |
| fig 6666666.28482.peg.3541 | R006533 | (gi:120401390) mce3C (Mvan 0365) - virulence factor Mce family protein [Mycobacterium vanbaalenii str. PYR-1] | 65.09 | 401 | 469 |
| fig 6666666.28482.peg.3541 | R006534 | (gi:120404934) mce3C (Mvan 3980) - virulence factor Mce family protein [Mycobacterium vanbaalenii str. PYR-1] | 63.5  | 400 | 469 |
| fig 6666666.28482.peg.3541 | R006536 | (gi:120405350) mce3C (Mvan 4397) - virulence factor Mce family protein [Mycobacterium vanbaalenii str. PYR-1] | 61    | 400 | 469 |
| fig 6666666.28482.peg.3541 | R006535 | (gi:120401939) mce3C (Mvan 0924) - virulence factor Mce family protein [Mycobacterium vanbaalenii str. PYR-1] | 61.25 | 400 | 469 |
| fig 6666666.28482.peg.3541 | R019397 | (gi:340626977) mce3C (MCAN 19841) - MCE-family protein MCE3C [Mycobacterium canettii str. CIPT 140010059]     | 65.26 | 380 | 469 |
| fig 6666666.28482.peg.3541 | R019398 | (gi:253798984) mce3C (TBMG 02022) - MCE-family protein mce3C [Mycobacterium tuberculosis str. KZN 1435]       | 65.26 | 380 | 469 |
| fig 6666666.28482.peg.3541 | R006522 | (gi:15609105) mce3C (Rv1968) - MCE-FAMILY PROTEIN MCE3C [Mycobacterium tuberculosis str. H37Rv]               | 65.26 | 380 | 469 |
| fig 6666666.28482.peg.3541 | R006523 | (gi:148661777) mce3C (MRA 1979) - MCE-family protein Mce3C [Mycobacterium tuberculosis str. H37Ra]            | 65.26 | 380 | 469 |

|                            |         |                                                                                                               |       |     |     |
|----------------------------|---------|---------------------------------------------------------------------------------------------------------------|-------|-----|-----|
| fig 6666666.28482.peg.3541 | R013526 | (gi:148823182) mce3C (TBFG 11999) - MCE-family protein mce3C [Mycobacterium tuberculosis str. F11]            | 65.26 | 380 | 469 |
| fig 6666666.28482.peg.3541 | R006524 | (gi:15841443) mce3C (MT2020) - virulence factor mce family protein [Mycobacterium tuberculosis str. CDC1551]  | 65.26 | 380 | 469 |
| fig 6666666.28482.peg.3541 | R006529 | (gi:118470845) mce3C (MSMEG 0348) - mce-family protein mce3c [Mycobacterium smegmatis str. MC2 155]           | 61.32 | 380 | 469 |
| fig 6666666.28482.peg.3541 | R019395 | (gi:183982888) mce3C (MMAR 2884) - MCE-family protein Mce3C [Mycobacterium marinum str. M]                    | 64.74 | 380 | 469 |
| fig 6666666.28482.peg.3542 | R006504 | (gi:118464539) mce3B (MAV 2533) - virulence factor Mce family protein [Mycobacterium avium str. 104]          | 80.99 | 342 | 342 |
| fig 6666666.28482.peg.3542 | R006516 | (gi:126436741) mce3B (Mjls 4169) - virulence factor Mce family protein [Mycobacterium sp. str. JLS]           | 72.81 | 342 | 342 |
| fig 6666666.28482.peg.3542 | R006515 | (gi:120405555) mce3B (Mvan 4603) - virulence factor Mce family protein [Mycobacterium vanbaalenii str. PYR-1] | 71.64 | 333 | 342 |
| fig 6666666.28482.peg.3542 | R006521 | (gi:108798624) mce3B (Mmcs 1655) - Mammalian cell entry [Mycobacterium sp. str. MCS]                          | 69.59 | 342 | 342 |
| fig 6666666.28482.peg.3542 | R006519 | (gi:119867720) mce3B (Mkms 1679) - virulence factor Mce family protein [Mycobacterium sp. str. KMS]           | 69.59 | 342 | 342 |
| fig 6666666.28482.peg.3542 | R006517 | (gi:126434221) mce3B (Mjls 1628) - virulence factor Mce family protein [Mycobacterium sp. str. JLS]           | 69.59 | 342 | 342 |
| fig 6666666.28482.peg.3542 | R006509 | (gi:145221250) mce3B (Mflv 0651) - virulence factor Mce family protein [Mycobacterium gilvum str. PYR-GCK]    | 69.59 | 342 | 342 |
| fig 6666666.28482.peg.3542 | R006508 | (gi:145222690) mce3B (Mflv 2102) - virulence factor Mce family protein [Mycobacterium gilvum str. PYR-GCK]    | 70.06 | 332 | 342 |
| fig 6666666.28482.peg.3542 | R019392 | (gi:183984023) mce3B (MMAR 4052) - MCE-family protein Mce3B 1 [Mycobacterium marinum str. M]                  | 68.22 | 342 | 342 |
| fig 6666666.28482.peg.3542 | R006506 | (gi:118619128) mce3B (MUL 3919) - MCE-family protein Mce3B 1 [Mycobacterium ulcerans str. Agy99]              | 68.22 | 342 | 342 |
| fig 6666666.28482.peg.3542 | R006511 | (gi:120401389) mce3B (Mvan 0364) - virulence factor Mce family protein [Mycobacterium vanbaalenii str. PYR-1] | 67.25 | 342 | 342 |
| fig 6666666.28482.peg.3542 | R019391 | (gi:183982887) mce3B (MMAR 2883) - MCE-family protein Mce3B [Mycobacterium marinum str. M]                    | 68.42 | 342 | 342 |



|                            |         |                                                                                                               |       |     |     |
|----------------------------|---------|---------------------------------------------------------------------------------------------------------------|-------|-----|-----|
| fig 6666666.28482.peg.3542 | R006500 | (gi:15609104) mce3B (Rv1967) - MCE-FAMILY PROTEIN MCE3B [Mycobacterium tuberculosis str. H37Rv]               | 66.96 | 342 | 342 |
| fig 6666666.28482.peg.3542 | R006501 | (gi:148661776) mce3B (MRA 1978) - MCE-family protein Mce3B [Mycobacterium tuberculosis str. H37Ra]            | 66.96 | 342 | 342 |
| fig 6666666.28482.peg.3542 | R013525 | (gi:148823181) mce3B (TBFG 11998) - MCE-family protein mce3B [Mycobacterium tuberculosis str. F11]            | 66.96 | 342 | 342 |
| fig 6666666.28482.peg.3542 | R006502 | (gi:15841442) mce3B (MT2019) - virulence factor mce family protein [Mycobacterium tuberculosis str. CDC1551]  | 66.96 | 342 | 342 |
| fig 6666666.28482.peg.3542 | R006518 | (gi:126436759) mce3B (Mjls 4187) - virulence factor Mce family protein [Mycobacterium sp. str. JLS]           | 67.54 | 342 | 342 |
| fig 6666666.28482.peg.3542 | R019394 | (gi:253798985) mce3B (TBMG 02023) - MCE-family protein mce3B [Mycobacterium tuberculosis str. KZN 1435]       | 66.96 | 342 | 342 |
| fig 6666666.28482.peg.3542 | R019393 | (gi:340626976) mce3B (MCAN 19831) - MCE-family protein MCE3B [Mycobacterium canettii str. CIPT 140010059]     | 66.67 | 342 | 342 |
| fig 6666666.28482.peg.3542 | R006512 | (gi:120404935) mce3B (Mvan 3981) - virulence factor Mce family protein [Mycobacterium vanbaalenii str. PYR-1] | 63.74 | 342 | 342 |
| fig 6666666.28482.peg.3542 | R006514 | (gi:120405351) mce3B (Mvan 4398) - virulence factor Mce family protein [Mycobacterium vanbaalenii str. PYR-1] | 61.99 | 342 | 342 |
| fig 6666666.28482.peg.3542 | R006510 | (gi:120401523) mce3B (Mvan 0501) - virulence factor Mce family protein [Mycobacterium vanbaalenii str. PYR-1] | 70.07 | 274 | 342 |
| fig 6666666.28482.peg.3542 | R006520 | (gi:108798495) mce3B (Mmcs 1525) - Mammalian cell entry [Mycobacterium sp. str. MCS]                          | 61.18 | 255 | 342 |
| fig 6666666.28482.peg.3543 | R006481 | (gi:118465483) mce3A (MAV 2532) - virulence factor Mce family protein [Mycobacterium avium str. 104]          | 76.48 | 438 | 493 |
| fig 6666666.28482.peg.3543 | R006493 | (gi:126436742) mce3A (Mjls 4170) - virulence factor Mce family protein [Mycobacterium sp. str. JLS]           | 61.96 | 437 | 493 |
| fig 6666666.28482.peg.3543 | R006498 | (gi:108798494) mce3A (Mmcs 1524) - Mammalian cell entry [Mycobacterium sp. str. MCS]                          | 60.05 | 397 | 493 |
| fig 6666666.28482.peg.3543 | R006496 | (gi:119867595) mce3A (Mkms 1547) - virulence factor Mce family protein [Mycobacterium sp. str. KMS]           | 60.05 | 397 | 493 |
| fig 6666666.28482.peg.3543 | R006483 | (gi:118619127) mce3A (MUL 3918) - MCE-family protein Mce3A 1 [Mycobacterium ulcerans str. Agy99]              | 60.47 | 463 | 493 |

|                            |         |                                                                                                        |       |     |     |
|----------------------------|---------|--------------------------------------------------------------------------------------------------------|-------|-----|-----|
| fig 6666666.28482.peg.3543 | R019388 | (gi:183984022) mce3A (MMAR 4051) - MCE-family protein Mce3A 1 [Mycobacterium marinum str. M]           | 60.86 | 460 | 493 |
| fig 6666666.28482.peg.3550 | R018641 | (gi:118465392) MAV2592 - hypothetical protein [Mycobacterium avium str. 104]                           | 74.19 | 62  | 65  |
| fig 6666666.28482.peg.3550 | R018643 | (gi:126436671) Mjls4098 - hypothetical protein [Mycobacterium sp. str. JLS]                            | 68.75 | 64  | 65  |
| fig 6666666.28482.peg.3550 | R018640 | (gi:41407602) MAP1504 - hypothetical protein [Mycobacterium avium str. K-10 (subsp. paratuberculosis)] | 67.19 | 64  | 65  |
| fig 6666666.28482.peg.3550 | R018642 | (gi:118618473) MUL3090 - ferredoxin [Mycobacterium ulcerans str. Agy99]                                | 67.74 | 62  | 65  |
| fig 6666666.28482.peg.3550 | R019852 | (gi:183982674) MMAR2667 - ferredoxin [Mycobacterium marinum str. M]                                    | 67.74 | 62  | 65  |
| fig 6666666.28482.peg.3550 | R019855 | (gi:253799174) TBMG02211 - ferredoxin [Mycobacterium tuberculosis str. KZN 1435]                       | 68.75 | 64  | 65  |
| fig 6666666.28482.peg.3550 | R018635 | (gi:15608924) Rv1786 - ferredoxin [Mycobacterium tuberculosis str. H37Rv]                              | 68.75 | 64  | 65  |
| fig 6666666.28482.peg.3550 | R018636 | (gi:148661593) MRA1800 - putative ferredoxin [Mycobacterium tuberculosis str. H37Ra]                   | 68.75 | 64  | 65  |
| fig 6666666.28482.peg.3550 | R018634 | (gi:148823001) TBF11816 - ferredoxin [Mycobacterium tuberculosis str. F11]                             | 68.75 | 64  | 65  |
| fig 6666666.28482.peg.3550 | R018637 | (gi:15841254) MT1835 - ferredoxin, putative [Mycobacterium tuberculosis str. CDC1551]                  | 68.75 | 64  | 65  |
| fig 6666666.28482.peg.3550 | R019856 | (gi:224990171) JTY1802 - putative ferredoxin [Mycobacterium bovis str. BCG str. Tokyo 172]             | 68.75 | 64  | 65  |
| fig 6666666.28482.peg.3550 | R018639 | (gi:121637687) BCG1818 - putative ferredoxin [Mycobacterium bovis str. BCG Pasteur 1173P2]             | 68.75 | 64  | 65  |
| fig 6666666.28482.peg.3550 | R018638 | (gi:31792974) Mb1814 - putative ferredoxin [Mycobacterium bovis str. AF2122/97]                        | 68.75 | 64  | 65  |
| fig 6666666.28482.peg.3550 | R019853 | (gi:339631840) MAF18080 - putative ferredoxin [Mycobacterium africanum str. GM041182]                  | 68.75 | 64  | 65  |
| fig 6666666.28482.peg.3550 | R019854 | (gi:340626798) MCAN18041 - putative ferredoxin [Mycobacterium canettii str. CIPT 140010059]            | 67.19 | 64  | 65  |

|                            |         |                                                                                                                                                                                                  |       |     |     |
|----------------------------|---------|--------------------------------------------------------------------------------------------------------------------------------------------------------------------------------------------------|-------|-----|-----|
| fig 6666666.28482.peg.3643 | R005437 | (gi:118465788) fbpC (MAV 5183) - antigen 85-C [Mycobacterium avium str. 104]                                                                                                                     | 90.66 | 332 | 346 |
| fig 6666666.28482.peg.3643 | R005436 | (gi:41409629) fbpC (MAP3531c) - FbpC2 [Mycobacterium avium str. K-10 (subsp. paratuberculosis)]                                                                                                  | 90.36 | 332 | 346 |
| fig 6666666.28482.peg.3643 | R005433 | (gi:15839510) fbpC (MT0137) - esterase, putative, antigen 85-C [Mycobacterium tuberculosis str. CDC1551]                                                                                         | 85.93 | 327 | 346 |
| fig 6666666.28482.peg.3643 | R018882 | (gi:253797048) fbpC (TBMG 00130) - secreted fibronectin-binding protein C antigen 85-C fbpC [Mycobacterium tuberculosis str. KZN 1435]                                                           | 85.93 | 327 | 346 |
| fig 6666666.28482.peg.3643 | R005431 | (gi:57116693) fbpC (Rv0129c) - SECRETED ANTIGEN 85-C FBPC (85C) (ANTIGEN 85 COMPLEX C) (AG58C) (MYCOLYL TRANSFERASE 85C) (FIBRONECTIN-BINDING PROTEIN C) [Mycobacterium tuberculosis str. H37Rv] | 85.93 | 327 | 346 |
| fig 6666666.28482.peg.3643 | R005432 | (gi:148659893) fbpC (MRA 0136) - secreted antigen 86-C FbpC [Mycobacterium tuberculosis str. H37Ra]                                                                                              | 85.93 | 327 | 346 |
| fig 6666666.28482.peg.3643 | R013426 | (gi:148821321) fbpC (TBMG 10130) - secreted antigen 85-C fbpC (fibronectin-binding protein C) [Mycobacterium tuberculosis str. F11]                                                              | 85.93 | 327 | 346 |
| fig 6666666.28482.peg.3643 | R018881 | (gi:340625164) fbpC (MCAN 01321) - secreted antigen 85-C FBPC [Mycobacterium canettii str. CIPT 140010059]                                                                                       | 85.93 | 327 | 346 |
| fig 6666666.28482.peg.3643 | R018883 | (gi:224988515) fbpC (JTY 0133) - secreted antigen 85-C [Mycobacterium bovis str. BCG str. Tokyo 172]                                                                                             | 85.93 | 327 | 346 |
| fig 6666666.28482.peg.3643 | R005435 | (gi:121636042) fbpC (BCG 0163c) - Secreted antigen 85-c fbpC (85C) [Mycobacterium bovis str. BCG Pasteur 1173P2]                                                                                 | 85.93 | 327 | 346 |
| fig 6666666.28482.peg.3643 | R005434 | (gi:31791308) fbpC (Mb0134c) - SECRETED ANTIGEN 85-C FBPC (85C) (ANTIGEN 85 COMPLEX C) (AG58C) (MYCOLYL TRANSFERASE 85C) (FIBRONECTIN-BINDING PROTEIN C) [Mycobacterium bovis str. AF2122/97]    | 85.93 | 327 | 346 |
| fig 6666666.28482.peg.3643 | R018880 | (gi:339630211) fbpC (MAF 01290) - secreted antigen 85-C FbpC [Mycobacterium africanum str. GM041182]                                                                                             | 85.93 | 327 | 346 |
| fig 6666666.28482.peg.3643 | R005438 | (gi:15828432) fbpC (ML2655) - secreted antigen 85A, mycolyltransferase [Mycobacterium leprae str. TN]                                                                                            | 81.98 | 333 | 346 |
| fig 6666666.28482.peg.3643 | R018884 | (gi:221230909) fbpC (MLBr 02655) - secreted antigen 85A, mycolyltransferase [Mycobacterium leprae str. Br4923]                                                                                   | 81.98 | 333 | 346 |

|                            |         |                                                                                                                                                                                    |       |     |     |
|----------------------------|---------|------------------------------------------------------------------------------------------------------------------------------------------------------------------------------------|-------|-----|-----|
| fig 6666666.28482.peg.3643 | R005439 | (gi:118619846) fbpC (MUL 4793) - secreted antigen 85-C FbpC [Mycobacterium ulcerans str. Agy99]                                                                                    | 86.85 | 327 | 346 |
| fig 6666666.28482.peg.3643 | R018879 | (gi:183980359) fbpC (MMAR 0328) - secreted antigen 85-C FbpC [Mycobacterium marinum str. M]                                                                                        | 86.85 | 327 | 346 |
| fig 6666666.28482.peg.3643 | R018885 | (gi:333992822) fbpC (JDM601 4182) - hypothetical protein [Mycobacterium sp. str. JDM601]                                                                                           | 84.21 | 323 | 346 |
| fig 6666666.28482.peg.3643 | R005464 | (gi:108799739) fbpC (Mmcs 2773) - putative esterase [Mycobacterium sp. str. MCS]                                                                                                   | 72.73 | 325 | 346 |
| fig 6666666.28482.peg.3643 | R005459 | (gi:119868849) fbpC (Mkms 2817) - putative esterase [Mycobacterium sp. str. KMS]                                                                                                   | 72.73 | 325 | 346 |
| fig 6666666.28482.peg.3643 | R005454 | (gi:126435380) fbpC (Mjls 2800) - putative esterase [Mycobacterium sp. str. JLS]                                                                                                   | 72.73 | 325 | 346 |
| fig 6666666.28482.peg.3643 | R005440 | (gi:118467737) fbpC (MSMEG 3580) - antigen 85-C [Mycobacterium smegmatis str. MC2 155]                                                                                             | 72.04 | 323 | 346 |
| fig 6666666.28482.peg.3643 | R005443 | (gi:145223921) fbpC (Mflv 3335) - putative esterase [Mycobacterium gilvum str. PYR-GCK]                                                                                            | 73.25 | 324 | 346 |
| fig 6666666.28482.peg.3643 | R005430 | (gi:118473709) fbpB (MSMEG 2078) - antigen 85-C [Mycobacterium smegmatis str. MC2 155]                                                                                             | 70    | 326 | 346 |
| fig 6666666.28482.peg.3643 | R005448 | (gi:120404040) fbpC (Mvan 3061) - putative esterase [Mycobacterium vanbaalenii str. PYR-1]                                                                                         | 75.74 | 300 | 346 |
| fig 6666666.28482.peg.3643 | R018868 | (gi:253800852) fbpA (TBMG 03851) - secreted fibronectin-binding protein antigen fbpA [Mycobacterium tuberculosis str. KZN 1435]                                                    | 66.86 | 336 | 346 |
| fig 6666666.28482.peg.3643 | R005411 | (gi:15610940) fbpA (Rv3804c) - SECRETED ANTIGEN 85-A FBPA (MYCOLYL TRANSFERASE 85A) (FIBRONECTIN-BINDING PROTEIN A) (ANTIGEN 85 COMPLEX A) [Mycobacterium tuberculosis str. H37Rv] | 66.86 | 336 | 346 |
| fig 6666666.28482.peg.3643 | R005412 | (gi:148663672) fbpA (MRA 3844) - secreted antigen 85-A FbpA [Mycobacterium tuberculosis str. H37Ra]                                                                                | 66.86 | 336 | 346 |
| fig 6666666.28482.peg.3643 | R013424 | (gi:148825011) fbpA (TBFG 13838) - secreted antigen 85-A fbpA (fibronectin-binding protein A) [Mycobacterium tuberculosis str. F11]                                                | 66.86 | 336 | 346 |
| fig 6666666.28482.peg.3643 | R018867 | (gi:340628773) fbpA (MCAN 38231) - secreted antigen 85-A FBPA [Mycobacterium canettii str. CIPT 140010059]                                                                         | 66.86 | 336 | 346 |
| fig 6666666.28482.peg.3643 | R018869 | (gi:224992216) fbpA (JTY 3868) - secreted antigen 85-A [Mycobacterium bovis str. BCG str. Tokyo 172]                                                                               | 66.86 | 336 | 346 |

|                            |         |                                                                                                                                                                                 |       |     |     |
|----------------------------|---------|---------------------------------------------------------------------------------------------------------------------------------------------------------------------------------|-------|-----|-----|
| fig 6666666.28482.peg.3643 | R005415 | (gi:121639721) fbpA (BCG 3866c) - Secreted antigen 85-A fbpA [Mycobacterium bovis str. BCG Pasteur 1173P2]                                                                      | 66.86 | 336 | 346 |
| fig 6666666.28482.peg.3643 | R005414 | (gi:31794978) fbpA (Mb3834c) - SECRETED ANTIGEN 85-A FBPA (MYCOLYL TRANSFERASE 85A) (FIBRONECTIN-BINDING PROTEIN A) (ANTIGEN 85 COMPLEX A) [Mycobacterium bovis str. AF2122/97] | 66.86 | 336 | 346 |
| fig 6666666.28482.peg.3643 | R005413 | (gi:15843426) fbpA (MT3911) - esterase, putative, antigen 85-A [Mycobacterium tuberculosis str. CDC1551]                                                                        | 66.86 | 336 | 346 |
| fig 6666666.28482.peg.3643 | R018866 | (gi:339633799) fbpA (MAF 38190) - secreted antigen 85-A FBPA (mycolyl transferase 85A) [Mycobacterium africanum str. GM041182]                                                  | 66.57 | 336 | 346 |
| fig 6666666.28482.peg.3643 | R005446 | (gi:120402899) fbpC (Mvan 1902) - putative esterase [Mycobacterium vanbaalenii str. PYR-1]                                                                                      | 68.63 | 319 | 346 |
| fig 6666666.28482.peg.3643 | R005444 | (gi:145225038) fbpC (Mflv 4459) - putative esterase [Mycobacterium gilvum str. PYR-68.01 GCK]                                                                                   | 68.01 | 319 | 346 |
| fig 6666666.28482.peg.3643 | R005417 | (gi:118467129) fbpA (MAV 0214) - antigen 85-A [Mycobacterium avium str. 104]                                                                                                    | 68.63 | 320 | 346 |
| fig 6666666.28482.peg.3643 | R005466 | (gi:108801978) fbpC (Mmcs 5015) - putative esterase [Mycobacterium sp. str. MCS]                                                                                                | 67.46 | 326 | 346 |
| fig 6666666.28482.peg.3643 | R005461 | (gi:119871130) fbpC (Mkms 5103) - putative esterase [Mycobacterium sp. str. KMS]                                                                                                | 67.46 | 326 | 346 |
| fig 6666666.28482.peg.3643 | R005456 | (gi:126437959) fbpC (Mjls 5396) - putative esterase [Mycobacterium sp. str. JLS]                                                                                                | 67.46 | 326 | 346 |
| fig 6666666.28482.peg.3643 | R005416 | (gi:41406314) fbpA (MAP0216) - FbpA [Mycobacterium avium str. K-10 (subsp. paratuberculosis)]                                                                                   | 68.32 | 320 | 346 |
| fig 6666666.28482.peg.3643 | R018864 | (gi:183985336) fbpA (MMAR 5368) - secreted antigen 85-A FbpA [Mycobacterium marinum str. M]                                                                                     | 66.37 | 331 | 346 |
| fig 6666666.28482.peg.3643 | R005441 | (gi:145221756) fbpC (Mflv 1164) - putative esterase [Mycobacterium gilvum str. PYR-66.77 GCK]                                                                                   | 66.77 | 323 | 346 |
| fig 6666666.28482.peg.3643 | R005419 | (gi:118620004) fbpA (MUL 4987) - secreted antigen 85-A FbpA [Mycobacterium ulcerans str. Agy99]                                                                                 | 66.07 | 331 | 346 |
| fig 6666666.28482.peg.3643 | R018872 | (gi:183982783) fbpB (MMAR 2777) - secreted antigen 85-B FbpB [Mycobacterium marinum str. M]                                                                                     | 67.28 | 322 | 346 |
| fig 6666666.28482.peg.3643 | R005429 | (gi:118618369) fbpB (MUL 2970) - secreted antigen 85-B FbpB [Mycobacterium ulcerans str. Agy99]                                                                                 | 66.67 | 322 | 346 |

|                            |         |                                                                                                                                                                                                                        |       |     |     |
|----------------------------|---------|------------------------------------------------------------------------------------------------------------------------------------------------------------------------------------------------------------------------|-------|-----|-----|
| fig 6666666.28482.peg.3643 | R005418 | (gi:15826932) fbpA (ML0097) - antigen 85A, mycolyltransferase [Mycobacterium leprae str. TN]                                                                                                                           | 64.33 | 326 | 346 |
| fig 6666666.28482.peg.3643 | R018870 | (gi:221229410) fbpA (MLBr 00097) - antigen 85A, mycolyltransferase [Mycobacterium leprae str. Br4923]                                                                                                                  | 64.33 | 326 | 346 |
| fig 6666666.28482.peg.3643 | R005426 | (gi:41407707) fbpB (MAP1609c) - FbpB [Mycobacterium avium str. K-10 (subsp. paratuberculosis)]                                                                                                                         | 68.59 | 310 | 346 |
| fig 6666666.28482.peg.3643 | R005427 | (gi:118465697) fbpB (MAV 2816) - antigen 85-B [Mycobacterium avium str. 104]                                                                                                                                           | 68.27 | 310 | 346 |
| fig 6666666.28482.peg.3643 | R018875 | (gi:253799070) fbpB (TBMG 02108) - secreted fibronectin-binding protein antigen 85-B fbpB [Mycobacterium tuberculosis str. KZN 1435]                                                                                   | 68.42 | 321 | 346 |
| fig 6666666.28482.peg.3643 | R005421 | (gi:15609023) fbpB (Rv1886c) - SECRETED ANTIGEN 85-B FBPB (85B) (ANTIGEN 85 COMPLEX B) (MYCOLYL TRANSFERASE 85B) (FIBRONECTIN-BINDING PROTEIN B) (EXTRACELLULAR ALPHA-ANTIGEN) [Mycobacterium tuberculosis str. H37Rv] | 68.42 | 321 | 346 |
| fig 6666666.28482.peg.3643 | R005422 | (gi:148661692) fbpB (MRA 1897) - secreted antigen 85-B FbpB [Mycobacterium tuberculosis str. H37Ra]                                                                                                                    | 68.42 | 321 | 346 |
| fig 6666666.28482.peg.3643 | R013425 | (gi:148823097) fbpB (TBFG 11914) - secreted antigen 85-B fbpB (fibronectin-binding protein B) [Mycobacterium tuberculosis str. F11]                                                                                    | 68.42 | 321 | 346 |
| fig 6666666.28482.peg.3643 | R018874 | (gi:340626894) fbpB (MCAN 19011) - secreted antigen 85-B FBPB [Mycobacterium canettii str. CIPT 140010059]                                                                                                             | 68.42 | 321 | 346 |
| fig 6666666.28482.peg.3643 | R005424 | (gi:31793077) fbpB (Mb1918c) - secreted antigen 85-B fbpB (85B) (antigen 85 complex B) (Mycolyl transferase 85B) (Fibronectin-binding protein B) (Extracellular alpha-antigen) [Mycobacterium bovis str. AF2122/97]    | 68.42 | 321 | 346 |
| fig 6666666.28482.peg.3643 | R018873 | (gi:339631939) fbpB (MAF 19080) - secreted antigen 85-B FBPB (85B) (antigen 85 complex B) [Mycobacterium africanum str. GM041182]                                                                                      | 68.42 | 321 | 346 |
| fig 6666666.28482.peg.3643 | R005423 | (gi:15841356) fbpB (MT1934) - esterase, putative, antigen 85-B [Mycobacterium tuberculosis str. CDC1551]                                                                                                               | 68.42 | 321 | 346 |
| fig 6666666.28482.peg.3643 | R005420 | (gi:118468744) fbpA (MSMEG 6398) - antigen 85-A [Mycobacterium smegmatis str. MC2 155]                                                                                                                                 | 62.87 | 328 | 346 |
| fig 6666666.28482.peg.3643 | R018876 | (gi:224990274) fbpB (JTY 1907) - secreted antigen 85-B [Mycobacterium bovis str. BCG str. Tokyo 172]                                                                                                                   | 68.11 | 321 | 346 |
| fig 6666666.28482.peg.3643 | R005425 | (gi:121637790) fbpB (BCG 1923c) - secreted antigen 85-B fbpB [Mycobacterium bovis str. BCG Pasteur 1173P2]                                                                                                             | 68.11 | 321 | 346 |

|                            |         |                                                                                                       |       |     |     |
|----------------------------|---------|-------------------------------------------------------------------------------------------------------|-------|-----|-----|
| fig 6666666.28482.peg.3643 | R005455 | (gi:126437080) fbpC (Mjls 4511) - putative esterase [Mycobacterium sp. str. JLS]                      | 64.92 | 316 | 346 |
| fig 6666666.28482.peg.3643 | R005452 | (gi:126434164) fbpC (Mjls 1566) - putative esterase [Mycobacterium sp. str. JLS]                      | 66.97 | 325 | 346 |
| fig 6666666.28482.peg.3643 | R005462 | (gi:108798566) fbpC (Mmcs 1596) - putative esterase [Mycobacterium sp. str. MCS]                      | 65.75 | 325 | 346 |
| fig 6666666.28482.peg.3643 | R005457 | (gi:119867665) fbpC (Mkms 1620) - putative esterase [Mycobacterium sp. str. KMS]                      | 65.75 | 325 | 346 |
| fig 6666666.28482.peg.3643 | R005428 | (gi:15828096) fbpB (ML2028) - antigen 85A, mycolyltransferase [Mycobacterium leprae str. TN]          | 64.4  | 321 | 346 |
| fig 6666666.28482.peg.3643 | R018877 | (gi:221230573) fbpB (MLBr 02028) - antigen 85A, mycolyltransferase [Mycobacterium leprae str. Br4923] | 64.4  | 321 | 346 |
| fig 6666666.28482.peg.3643 | R018878 | (gi:333990613) fbpB (JDM601 1973) - hypothetical protein [Mycobacterium sp. str. JDM601]              | 63.61 | 313 | 346 |
| fig 6666666.28482.peg.3643 | R005442 | (gi:145223828) fbpC (Mflv 3241) - putative esterase [Mycobacterium gilvum str. PYR-62.7 GCK]          | 62.7  | 310 | 346 |
| fig 6666666.28482.peg.3643 | R005447 | (gi:120403937) fbpC (Mvan 2954) - putative esterase [Mycobacterium vanbaalenii str. PYR-1]            | 61.34 | 312 | 346 |
| fig 6666666.28482.peg.3643 | R005465 | (gi:108801146) fbpC (Mmcs 4182) - putative esterase [Mycobacterium sp. str. MCS]                      | 61.89 | 301 | 346 |
| fig 6666666.28482.peg.3643 | R005460 | (gi:119870278) fbpC (Mkms 4248) - putative esterase [Mycobacterium sp. str. KMS]                      | 61.89 | 301 | 346 |
| fig 6666666.28482.peg.3643 | R005445 | (gi:145225722) fbpC (Mflv 5146) - putative esterase [Mycobacterium gilvum str. PYR-60.26 GCK]         | 60.26 | 307 | 346 |
| fig 6666666.28482.peg.3643 | R018871 | (gi:333992762) fbpA (JDM601 4122) - hypothetical protein [Mycobacterium sp. str. JDM601]              | 63.64 | 314 | 346 |
| fig 6666666.28482.peg.3643 | R005458 | (gi:119867920) fbpC (Mkms 1882) - putative esterase [Mycobacterium sp. str. KMS]                      | 61.47 | 326 | 346 |
| fig 6666666.28482.peg.3643 | R005453 | (gi:126434404) fbpC (Mjls 1816) - putative esterase [Mycobacterium sp. str. JLS]                      | 61.47 | 326 | 346 |
| fig 6666666.28482.peg.3742 | R006348 | (gi:118465982) mce1A (MAV 5015) - virulence factor Mce family protein [Mycobacterium avium str. 104]  | 76.98 | 442 | 448 |

|                            |         |                                                                                                           |       |     |     |
|----------------------------|---------|-----------------------------------------------------------------------------------------------------------|-------|-----|-----|
| fig 6666666.28482.peg.3742 | R006346 | (gi:41409702) mce1A (MAP3604) - Mce1 2 [Mycobacterium avium str. K-10 (subsp. paratuberculosis)]          | 75.17 | 442 | 448 |
| fig 6666666.28482.peg.3742 | R006351 | (gi:15828393) mce1A (ML2589) - putative cell invasion protein [Mycobacterium leprae str. TN]              | 75.91 | 440 | 448 |
| fig 6666666.28482.peg.3742 | R019325 | (gi:221230870) mce1A (MLBr 02589) - putative cell invasion protein [Mycobacterium leprae str. Br4923]     | 75.91 | 440 | 448 |
| fig 6666666.28482.peg.3742 | R006350 | (gi:118464886) mce1A (MAV 4126) - virulence factor Mce family protein [Mycobacterium avium str. 104]      | 75.51 | 440 | 448 |
| fig 6666666.28482.peg.3742 | R006349 | (gi:118464153) mce1A (MAV 4125) - virulence factor Mce family protein [Mycobacterium avium str. 104]      | 72.81 | 444 | 448 |
| fig 6666666.28482.peg.3742 | R006347 | (gi:41409387) mce1A (MAP3289c) - Mce1 1 [Mycobacterium avium str. K-10 (subsp. paratuberculosis)]         | 73.24 | 440 | 448 |
| fig 6666666.28482.peg.3742 | R019323 | (gi:253797091) mce1A (TBMG 00170) - MCE-family protein mce1A [Mycobacterium tuberculosis str. KZN 1435]   | 70.07 | 442 | 448 |
| fig 6666666.28482.peg.3742 | R006341 | (gi:57116701) mce1A (Rv0169) - MCE-FAMILY PROTEIN MCE1A [Mycobacterium tuberculosis str. H37Rv]           | 70.07 | 442 | 448 |
| fig 6666666.28482.peg.3742 | R006342 | (gi:148659933) mce1A (MRA 0177) - MCE-family protein Mce1A [Mycobacterium tuberculosis str. H37Ra]        | 70.07 | 442 | 448 |
| fig 6666666.28482.peg.3742 | R013512 | (gi:148821361) mce1A (TBFG 10170) - MCE-family protein mce1A [Mycobacterium tuberculosis str. F11]        | 70.07 | 442 | 448 |
| fig 6666666.28482.peg.3742 | R006343 | (gi:15839547) mce1A (MT0178) - virulence factor [Mycobacterium tuberculosis str. CDC1551]                 | 70.07 | 442 | 448 |
| fig 6666666.28482.peg.3742 | R019320 | (gi:183980443) mce1A (MMAR 0412) - MCE-family protein Mce1A [Mycobacterium marinum str. M]                | 70.59 | 442 | 448 |
| fig 6666666.28482.peg.3742 | R006352 | (gi:118616795) mce1A (MUL 1062) - MCE-family protein Mce1A [Mycobacterium ulcerans str. Agy99]            | 70.36 | 442 | 448 |
| fig 6666666.28482.peg.3742 | R019322 | (gi:340625206) mce1A (MCAN 01751) - MCE-family protein MCE1A [Mycobacterium canettii str. CIPT 140010059] | 69.84 | 442 | 448 |
| fig 6666666.28482.peg.3742 | R019324 | (gi:224988554) mce1A (JTY 0175) - MCE-family protein [Mycobacterium bovis str. BCG str. Tokyo 172]        | 69.84 | 442 | 448 |
| fig 6666666.28482.peg.3742 | R006345 | (gi:121636081) mce1A (BCG 0206) - MCE-family protein mce1A [Mycobacterium bovis str. BCG Pasteur 1173P2]  | 69.84 | 442 | 448 |



|                            |         |                                                                                                                |       |     |     |
|----------------------------|---------|----------------------------------------------------------------------------------------------------------------|-------|-----|-----|
| fig 6666666.28482.peg.3742 | R006344 | (gi:31791347) mce1A (Mb0175) - MCE-FAMILY PROTEIN MCE1A [Mycobacterium bovis str. AF2122/97]                   | 69.84 | 442 | 448 |
| fig 6666666.28482.peg.3742 | R019321 | (gi:339630250) mce1A (MAF 01700) - MCE-family protein MCE1A [Mycobacterium africanum str. GM041182]            | 69.84 | 442 | 448 |
| fig 6666666.28482.peg.3742 | R006410 | (gi:118465139) mce2A (MAV 4551) - virulence factor Mce family protein [Mycobacterium avium str. 104]           | 61.65 | 412 | 448 |
| fig 6666666.28482.peg.3742 | R006409 | (gi:41410182) mce2A (MAP4084) - Mce2 [Mycobacterium avium str. K-10 (subsp. paratuberculosis)]                 | 60.64 | 409 | 448 |
| fig 6666666.28482.peg.3743 | R006359 | (gi:41409703) mce1B (MAP3605) - hypothetical protein [Mycobacterium avium str. K-10 (subsp. paratuberculosis)] | 88.73 | 346 | 346 |
| fig 6666666.28482.peg.3743 | R006360 | (gi:118463171) mce1B (MAV 5014) - virulence factor Mce family protein [Mycobacterium avium str. 104]           | 88.73 | 346 | 346 |
| fig 6666666.28482.peg.3743 | R019327 | (gi:183980444) mce1B (MMAR 0413) - MCE-family protein Mce1B [Mycobacterium marinum str. M]                     | 81.5  | 346 | 346 |
| fig 6666666.28482.peg.3743 | R006362 | (gi:118616796) mce1B (MUL 1063) - MCE-family protein Mce1B [Mycobacterium ulcerans str. Agy99]                 | 81.21 | 346 | 346 |
| fig 6666666.28482.peg.3743 | R006361 | (gi:15828394) mce1B (ML2590) - putative secreted protein [Mycobacterium leprae str. TN]                        | 81.5  | 346 | 346 |
| fig 6666666.28482.peg.3743 | R019332 | (gi:221230871) mce1B (MLBr 02590) - putative secreted protein [Mycobacterium leprae str. Br4923]               | 81.5  | 346 | 346 |
| fig 6666666.28482.peg.3743 | R019329 | (gi:340625207) mce1B (MCAN 01761) - MCE-family protein MCE1B [Mycobacterium canettii str. CIPT 140010059]      | 78.03 | 346 | 346 |
| fig 6666666.28482.peg.3743 | R019330 | (gi:253797092) mce1B (TBMG 00171) - MCE-family protein mce1B [Mycobacterium tuberculosis str. KZN 1435]        | 77.46 | 346 | 346 |
| fig 6666666.28482.peg.3743 | R006354 | (gi:15607311) mce1B (Rv0170) - MCE-FAMILY PROTEIN MCE1B [Mycobacterium tuberculosis str. H37Rv]                | 77.46 | 346 | 346 |
| fig 6666666.28482.peg.3743 | R006355 | (gi:148659934) mce1B (MRA 0178) - MCE-family protein Mce1B [Mycobacterium tuberculosis str. H37Ra]             | 77.46 | 346 | 346 |
| fig 6666666.28482.peg.3743 | R013513 | (gi:148821362) mce1B (TBFG 10171) - MCE-family protein mce1B [Mycobacterium tuberculosis str. F11]             | 77.46 | 346 | 346 |
| fig 6666666.28482.peg.3743 | R006356 | (gi:15839548) mce1B (MT0179) - virulence factor mce family protein [Mycobacterium tuberculosis str. CDC1551]   | 77.46 | 346 | 346 |

|                            |         |                                                                                                                |       |     |     |
|----------------------------|---------|----------------------------------------------------------------------------------------------------------------|-------|-----|-----|
| fig 6666666.28482.peg.3743 | R019331 | (gi:224988555) mce1B (JTY 0176) - MCE-family protein [Mycobacterium bovis str. BCG str. Tokyo 172]             | 77.17 | 346 | 346 |
| fig 6666666.28482.peg.3743 | R006358 | (gi:121636082) mce1B (BCG 0207) - MCE-family protein mce1B [Mycobacterium bovis str. BCG Pasteur 1173P2]       | 77.17 | 346 | 346 |
| fig 6666666.28482.peg.3743 | R006357 | (gi:31791348) mce1B (Mb0176) - MCE-FAMILY PROTEIN MCE1B [Mycobacterium bovis str. AF2122/97]                   | 77.17 | 346 | 346 |
| fig 6666666.28482.peg.3743 | R019328 | (gi:339630251) mce1B (MAF 01710) - MCE-family protein MCE1B [Mycobacterium africanum str. GM041182]            | 77.17 | 346 | 346 |
| fig 6666666.28482.peg.3743 | R006428 | (gi:108797099) mce2B (Mmcs 0119) - Mammalian cell entry [Mycobacterium sp. str. MCS]                           | 68.5  | 346 | 346 |
| fig 6666666.28482.peg.3743 | R006427 | (gi:119866184) mce2B (Mkms 0128) - virulence factor Mce family protein [Mycobacterium sp. str. KMS]            | 68.5  | 346 | 346 |
| fig 6666666.28482.peg.3743 | R006426 | (gi:126432722) mce2B (Mjls 0109) - virulence factor Mce family protein [Mycobacterium sp. str. JLS]            | 68.5  | 346 | 346 |
| fig 6666666.28482.peg.3743 | R006363 | (gi:118468987) mce1B (MSMEG 0135) - virulence factor Mce family protein [Mycobacterium smegmatis str. MC2 155] | 65.32 | 346 | 346 |
| fig 6666666.28482.peg.3743 | R006424 | (gi:145221305) mce2B (Mflv 0710) - virulence factor Mce family protein [Mycobacterium gilvum str. PYR-GCK]     | 66.47 | 346 | 346 |
| fig 6666666.28482.peg.3743 | R006425 | (gi:120401163) mce2B (Mvan 0135) - virulence factor Mce family protein [Mycobacterium vanbaalenii str. PYR-1]  | 65.9  | 346 | 346 |
| fig 6666666.28482.peg.3743 | R019333 | (gi:333988763) mce1B (JDM601 0123) - MCE-family protein Mce1B [Mycobacterium sp. str. JDM601]                  | 68.5  | 346 | 346 |
| fig 6666666.28482.peg.3743 | R019368 | (gi:340625620) mce2B (MCAN 05961) - mce-family protein mce2b [Mycobacterium canettii str. CIPT 140010059]      | 64.45 | 346 | 346 |
| fig 6666666.28482.peg.3743 | R019370 | (gi:224988980) mce2B (JTY 0605) - MCE-family protein [Mycobacterium bovis str. BCG str. Tokyo 172]             | 64.45 | 346 | 346 |
| fig 6666666.28482.peg.3743 | R006421 | (gi:121636508) mce2B (BCG 0635) - mce-family protein mce2B [Mycobacterium bovis str. BCG Pasteur 1173P2]       | 64.45 | 346 | 346 |
| fig 6666666.28482.peg.3743 | R006420 | (gi:31791772) mce2B (Mb0605) - MCE-FAMILY PROTEIN MCE2B [Mycobacterium bovis str. AF2122/97]                   | 64.45 | 346 | 346 |
| fig 6666666.28482.peg.3743 | R019367 | (gi:339630658) mce2B (MAF 05970) - MCE-family protein MCE2B [Mycobacterium africanum str. GM041182]            | 64.45 | 346 | 346 |

|                            |         |                                                                                                                |       |     |     |
|----------------------------|---------|----------------------------------------------------------------------------------------------------------------|-------|-----|-----|
| fig 6666666.28482.peg.3743 | R006422 | (gi:41410183) mce2B (MAP4085) - hypothetical protein [Mycobacterium avium str. K-10 (subsp. paratuberculosis)] | 63.58 | 346 | 346 |
| fig 6666666.28482.peg.3743 | R006423 | (gi:118465867) mce2B (MAV 4550) - virulence factor Mce family protein [Mycobacterium avium str. 104]           | 63.29 | 346 | 346 |
| fig 6666666.28482.peg.3743 | R019369 | (gi:253797524) mce2B (TBMG 00597) - MCE-family protein mce2B [Mycobacterium tuberculosis str. KZN 1435]        | 65.76 | 257 | 346 |
| fig 6666666.28482.peg.3743 | R006417 | (gi:15607730) mce2B (Rv0590) - MCE-FAMILY PROTEIN MCE2B [Mycobacterium tuberculosis str. H37Rv]                | 65.76 | 257 | 346 |
| fig 6666666.28482.peg.3743 | R006418 | (gi:148660359) mce2B (MRA 0597) - MCE-family protein Mce2B [Mycobacterium tuberculosis str. H37Ra]             | 65.76 | 257 | 346 |
| fig 6666666.28482.peg.3743 | R013519 | (gi:148821792) mce2B (TBFG 10601) - MCE-family protein mce2B [Mycobacterium tuberculosis str. F11]             | 65.76 | 257 | 346 |
| fig 6666666.28482.peg.3743 | R006419 | (gi:15839992) mce2B (MT0619) - virulence factor mce family protein [Mycobacterium tuberculosis str. CDC1551]   | 65.37 | 257 | 346 |
| fig 6666666.28482.peg.3744 | R006370 | (gi:118467050) mce1C (MAV 5013) - mce-family protein mce1c [Mycobacterium avium str. 104]                      | 84.58 | 506 | 520 |
| fig 6666666.28482.peg.3744 | R006369 | (gi:41409704) mce1C (MAP3606) - hypothetical protein [Mycobacterium avium str. K-10 (subsp. paratuberculosis)] | 84.2  | 481 | 520 |
| fig 6666666.28482.peg.3744 | R006371 | (gi:15828395) mce1C (ML2591) - putative secreted protein [Mycobacterium leprae str. TN]                        | 76.53 | 506 | 520 |
| fig 6666666.28482.peg.3744 | R019339 | (gi:221230872) mce1C (MLBr 02591) - putative secreted protein [Mycobacterium leprae str. Br4923]               | 76.53 | 506 | 520 |
| fig 6666666.28482.peg.3744 | R019334 | (gi:183980445) mce1C (MMAR 0414) - MCE-family protein Mce1C [Mycobacterium marinum str. M]                     | 77.39 | 481 | 520 |
| fig 6666666.28482.peg.3744 | R006372 | (gi:118616797) mce1C (MUL 1064) - MCE-family protein Mce1C [Mycobacterium ulcerans str. Agy99]                 | 76.97 | 481 | 520 |
| fig 6666666.28482.peg.3744 | R019338 | (gi:224988556) mce1C (JTY 0177) - MCE-family protein [Mycobacterium bovis str. BCG str. Tokyo 172]             | 76.82 | 466 | 520 |
| fig 6666666.28482.peg.3744 | R006368 | (gi:121636083) mce1C (BCG 0208) - MCE-family protein mce1C [Mycobacterium bovis str. BCG Pasteur 1173P2]       | 76.82 | 466 | 520 |
| fig 6666666.28482.peg.3744 | R006367 | (gi:31791349) mce1C (Mb0177) - MCE-FAMILY PROTEIN MCE1C [Mycobacterium bovis str. AF2122/97]                   | 76.82 | 466 | 520 |

|                            |         |                                                                                                                          |       |     |     |
|----------------------------|---------|--------------------------------------------------------------------------------------------------------------------------|-------|-----|-----|
| fig 6666666.28482.peg.3744 | R019335 | (gi:339630252) mce1C (MAF 01720) - MCE-family protein MCE1C [Mycobacterium africanum str. GM041182]                      | 76.82 | 466 | 520 |
| fig 6666666.28482.peg.3744 | R019336 | (gi:340625208) mce1C (MCAN 01771) - MCE-family protein MCE1C [Mycobacterium canettii str. CIPT 140010059]                | 76.82 | 466 | 520 |
| fig 6666666.28482.peg.3744 | R006366 | (gi:15839549) mce1C (MT0180) - virulence factor mce family protein [Mycobacterium tuberculosis str. CDC1551]             | 76.61 | 466 | 520 |
| fig 6666666.28482.peg.3744 | R006364 | (gi:15607312) mce1C (Rv0171) - MCE-FAMILY PROTEIN MCE1C [Mycobacterium tuberculosis str. H37Rv]                          | 76.61 | 466 | 520 |
| fig 6666666.28482.peg.3744 | R006365 | (gi:148659935) mce1C (MRA 0179) - MCE-family protein Mce1C [Mycobacterium tuberculosis str. H37Ra]                       | 76.61 | 466 | 520 |
| fig 6666666.28482.peg.3744 | R013514 | (gi:148821363) mce1C (TBFG 10172) - MCE-family protein mce1C [Mycobacterium tuberculosis str. F11]                       | 76.61 | 466 | 520 |
| fig 6666666.28482.peg.3744 | R019337 | (gi:253797093) mce1C (TBMG 00172) - MCE-family protein mce1C [Mycobacterium tuberculosis str. KZN 1435]                  | 76.57 | 461 | 520 |
| fig 6666666.28482.peg.3744 | R006373 | (gi:118473407) mce1C (MSMEG 0136) - virulence factor Mce family protein, putative [Mycobacterium smegmatis str. MC2 155] | 61.23 | 471 | 520 |
| fig 6666666.28482.peg.3744 | R019340 | (gi:333988764) mce1C (JDM601 0124) - MCE-family protein Mce1C [Mycobacterium sp. str. JDM601]                            | 61.95 | 467 | 520 |
| fig 6666666.28482.peg.3744 | R006438 | (gi:126432723) mce2C (Mjls 0110) - virulence factor Mce family protein [Mycobacterium sp. str. JLS]                      | 60.87 | 479 | 520 |
| fig 6666666.28482.peg.3744 | R006440 | (gi:108797100) mce2C (Mmcs 0120) - Mammalian cell entry [Mycobacterium sp. str. MCS]                                     | 61.08 | 479 | 520 |
| fig 6666666.28482.peg.3744 | R006439 | (gi:119866185) mce2C (Mkms 0129) - virulence factor Mce family protein [Mycobacterium sp. str. KMS]                      | 61.08 | 479 | 520 |
| fig 6666666.28482.peg.3744 | R019371 | (gi:339630659) mce2C (MAF 05980) - MCE-family protein MCE2C [Mycobacterium africanum str. GM041182]                      | 66.81 | 470 | 520 |
| fig 6666666.28482.peg.3744 | R019374 | (gi:224988981) mce2C (JTY 0606) - MCE-family protein [Mycobacterium bovis str. BCG str. Tokyo 172]                       | 66.81 | 470 | 520 |
| fig 6666666.28482.peg.3744 | R006433 | (gi:121636509) mce2C (BCG 0636) - mce-family protein mce2C [Mycobacterium bovis str. BCG Pasteur 1173P2]                 | 66.81 | 470 | 520 |
| fig 6666666.28482.peg.3744 | R006432 | (gi:31791773) mce2C (Mb0606) - MCE-FAMILY PROTEIN MCE2C [Mycobacterium bovis str. AF2122/97]                             | 66.81 | 470 | 520 |

|                            |         |                                                                                                                        |       |     |     |
|----------------------------|---------|------------------------------------------------------------------------------------------------------------------------|-------|-----|-----|
| fig 6666666.28482.peg.3744 | R019373 | (gi:253797526) mce2C (TBMG 00599) - MCE-family protein mce2C [Mycobacterium tuberculosis str. KZN 1435]                | 66.6  | 470 | 520 |
| fig 6666666.28482.peg.3744 | R006429 | (gi:15607731) mce2C (Rv0591) - MCE-FAMILY PROTEIN MCE2C [Mycobacterium tuberculosis str. H37Rv]                        | 66.6  | 470 | 520 |
| fig 6666666.28482.peg.3744 | R006430 | (gi:148660361) mce2C (MRA 0599) - MCE-family protein Mce2C [Mycobacterium tuberculosis str. H37Ra]                     | 66.6  | 470 | 520 |
| fig 6666666.28482.peg.3744 | R013520 | (gi:148821794) mce2C (TBFG 10603) - MCE-family protein mce2C [Mycobacterium tuberculosis str. F11]                     | 66.6  | 470 | 520 |
| fig 6666666.28482.peg.3744 | R006435 | (gi:118463703) mce2C (MAV 4549) - mce-family protein mce2c [Mycobacterium avium str. 104]                              | 66.1  | 467 | 520 |
| fig 6666666.28482.peg.3744 | R006434 | (gi:41410184) mce2C (MAP4086) - hypothetical protein [Mycobacterium avium str. K-10 (subsp. paratuberculosis)]         | 65.88 | 467 | 520 |
| fig 6666666.28482.peg.3744 | R019372 | (gi:340625621) mce2C (MCAN 05971) - MCE-family protein MCE2C [Mycobacterium canettii str. CIPT 140010059]              | 66.81 | 470 | 520 |
| fig 6666666.28482.peg.3744 | R006437 | (gi:120401164) mce2C (Mvan 0136) - virulence factor Mce family protein [Mycobacterium vanbaalenii str. PYR-1]          | 61.78 | 449 | 520 |
| fig 6666666.28482.peg.3744 | R006436 | (gi:145221304) mce2C (Mflv 0709) - virulence factor Mce family protein [Mycobacterium gilvum str. PYR-GCK]             | 60.22 | 449 | 520 |
| fig 6666666.28482.peg.3744 | R006431 | (gi:15839994) mce2C (MT0621) - virulence factor mce family protein [Mycobacterium tuberculosis str. CDC1551]           | 65.32 | 346 | 520 |
| fig 6666666.28482.peg.3819 | R005153 | (gi:145223891) pcaA (Mflv 3304) - Cyclopropane-fatty-acyl-phospholipid synthase [Mycobacterium gilvum str. PYR-GCK]    | 68.06 | 288 | 291 |
| fig 6666666.28482.peg.3819 | R005157 | (gi:108799701) pcaA (Mmcs 2735) - Cyclopropane-fatty-acyl-phospholipid synthase [Mycobacterium sp. str. MCS]           | 68.88 | 286 | 291 |
| fig 6666666.28482.peg.3819 | R005156 | (gi:119868811) pcaA (Mkms 2779) - Cyclopropane-fatty-acyl-phospholipid synthase [Mycobacterium sp. str. KMS]           | 68.88 | 286 | 291 |
| fig 6666666.28482.peg.3819 | R005155 | (gi:126435345) pcaA (Mjls 2765) - Cyclopropane-fatty-acyl-phospholipid synthase [Mycobacterium sp. str. JLS]           | 68.88 | 286 | 291 |
| fig 6666666.28482.peg.3819 | R005167 | (gi:108797926) cmaA2 (Mmcs 0952) - Cyclopropane-fatty-acyl-phospholipid synthase [Mycobacterium sp. str. MCS]          | 68.9  | 283 | 291 |
| fig 6666666.28482.peg.3819 | R005154 | (gi:120404005) pcaA (Mvan 3025) - Cyclopropane-fatty-acyl-phospholipid synthase [Mycobacterium vanbaalenii str. PYR-1] | 67.25 | 287 | 291 |

|                            |         |                                                                                                                                          |       |     |     |
|----------------------------|---------|------------------------------------------------------------------------------------------------------------------------------------------|-------|-----|-----|
| fig 6666666.28482.peg.3819 | R005151 | (gi:15828331) <i>pcaA</i> (ML2459) - Mycolic acid synthase [Mycobacterium leprae str. TN]                                                | 67.61 | 284 | 291 |
| fig 6666666.28482.peg.3819 | R018712 | (gi:221230808) <i>pcaA</i> (MLBr 02459) - Mycolic acid synthase [Mycobacterium leprae str. Br4923]                                       | 67.61 | 284 | 291 |
| fig 6666666.28482.peg.3819 | R005152 | (gi:118619634) <i>pcaA</i> (MUL 4539) - mycolic acid synthase PcaA [Mycobacterium ulcerans str. Agy99]                                   | 67.49 | 283 | 291 |
| fig 6666666.28482.peg.3819 | R018707 | (gi:183980820) <i>pcaA</i> (MMAR 0796) - mycolic acid synthase PcaA [Mycobacterium marinum str. M]                                       | 67.49 | 283 | 291 |
| fig 6666666.28482.peg.3819 | R018710 | (gi:253797397) <i>pcaA</i> (TBMG 00472) - mycolic acid synthase PcaA [Mycobacterium tuberculosis str. KZN 1435]                          | 66.43 | 283 | 291 |
| fig 6666666.28482.peg.3819 | R005144 | (gi:57116736) <i>pcaA</i> (Rv0470c) - MYCOLIC ACID SYNTHASE PCAA (CYCLOPROPANE SYNTHASE) [Mycobacterium tuberculosis str. H37Rv]         | 66.43 | 283 | 291 |
| fig 6666666.28482.peg.3819 | R005145 | (gi:148660236) <i>pcaA</i> (MRA 0476) - mycolic acid synthase PcaA [Mycobacterium tuberculosis str. H37Ra]                               | 66.43 | 283 | 291 |
| fig 6666666.28482.peg.3819 | R013397 | (gi:148821668) <i>pcaA</i> (TBF 10477) - mycolic acid synthase <i>pcaA</i> (cyclopropane synthase) [Mycobacterium tuberculosis str. F11] | 66.43 | 283 | 291 |
| fig 6666666.28482.peg.3819 | R005146 | (gi:15839858) <i>pcaA</i> (MT0486) - mycolic acid synthase [Mycobacterium tuberculosis str. CDC1551]                                     | 66.43 | 283 | 291 |
| fig 6666666.28482.peg.3819 | R018709 | (gi:340625496) <i>pcaA</i> (MCAN 04691) - mycolic acid synthase PCAA [Mycobacterium canettii str. CIPT 140010059]                        | 66.43 | 283 | 291 |
| fig 6666666.28482.peg.3819 | R005148 | (gi:121636385) <i>pcaA</i> (BCG 0510c) - Mycolic acid synthase <i>pcaA</i> [Mycobacterium bovis str. BCG Pasteur 1173P2]                 | 66.43 | 283 | 291 |
| fig 6666666.28482.peg.3819 | R005147 | (gi:31791649) <i>pcaA</i> (Mb0479c) - MYCOLIC ACID SYNTHASE PCAA (CYCLOPROPANE SYNTHASE) [Mycobacterium bovis str. AF2122/97]            | 66.43 | 283 | 291 |
| fig 6666666.28482.peg.3819 | R018708 | (gi:339630539) <i>pcaA</i> (MAF 04730) - mycolic acid synthase PCAA (cyclopropane synthase) [Mycobacterium africanum str. GM041182]      | 66.43 | 283 | 291 |
| fig 6666666.28482.peg.3819 | R005150 | (gi:118465677) <i>pcaA</i> (MAV 4679) - cyclopropane-fatty-acyl-phospholipid synthase 1 [Mycobacterium avium str. 104]                   | 65.85 | 284 | 291 |
| fig 6666666.28482.peg.3819 | R018711 | (gi:224988857) <i>pcaA</i> (JTY 0480) - mycolic acid synthase [Mycobacterium bovis str. BCG str. Tokyo 172]                              | 66.43 | 283 | 291 |
| fig 6666666.28482.peg.3819 | R005149 | (gi:41410062) <i>pcaA</i> (MAP3964c) - UmaA2 [Mycobacterium avium str. K-10 (subsp. paratuberculosis)]                                   | 65.49 | 284 | 291 |

|                            |         |                                                                                                                               |       |     |     |
|----------------------------|---------|-------------------------------------------------------------------------------------------------------------------------------|-------|-----|-----|
| fig 6666666.28482.peg.3819 | R018720 | (gi:333990669) cmaA2 (JDM601 2029) - methoxy mycolic acid synthase [Mycobacterium sp. str. JDM601]                            | 60.76 | 283 | 291 |
| fig 6666666.28482.peg.3972 | R005809 | (gi:41408060) glnA1 (MAP1962) - GlnA1 [Mycobacterium avium str. K-10 (subsp. paratuberculosis)]                               | 94.98 | 478 | 478 |
| fig 6666666.28482.peg.3972 | R005810 | (gi:118464473) glnA1 (MAV 2267) - glutamine synthetase, type I [Mycobacterium avium str. 104]                                 | 94.98 | 478 | 478 |
| fig 6666666.28482.peg.3972 | R019011 | (gi:183983279) glnA1 (MMAR 3289) - glutamine synthetase GlnA1 [Mycobacterium marinum str. M]                                  | 91.84 | 478 | 478 |
| fig 6666666.28482.peg.3972 | R005812 | (gi:118617032) glnA1 (MUL 1340) - glutamine synthetase GlnA1 [Mycobacterium ulcerans str. Agy99]                              | 91    | 478 | 478 |
| fig 6666666.28482.peg.3972 | R019015 | (gi:253798714) glnA1 (TBMG 01760) - glutamine synthetase glnA1 [Mycobacterium tuberculosis str. KZN 1435]                     | 90.59 | 478 | 478 |
| fig 6666666.28482.peg.3972 | R005804 | (gi:15609357) glnA1 (Rv2220) - GLUTAMINE SYNTHETASE GLNA1 (GLUTAMINE SYNTHASE) (GS-I) [Mycobacterium tuberculosis str. H37Rv] | 90.59 | 478 | 478 |
| fig 6666666.28482.peg.3972 | R005805 | (gi:148662038) glnA1 (MRA 2237) - glutamine synthetase [Mycobacterium tuberculosis str. H37Ra]                                | 90.59 | 478 | 478 |
| fig 6666666.28482.peg.3972 | R013457 | (gi:148823428) glnA1 (TBFG 12249) - glutamine synthetase glnA1 [Mycobacterium tuberculosis str. F11]                          | 90.59 | 478 | 478 |
| fig 6666666.28482.peg.3972 | R005806 | (gi:15841712) glnA1 (MT2278) - glutamine synthetase [Mycobacterium tuberculosis str. CDC1551]                                 | 90.59 | 478 | 478 |
| fig 6666666.28482.peg.3972 | R019014 | (gi:340627226) glnA1 (MCAN 22431) - glutamine synthetase GLNA1 [Mycobacterium canettii str. CIPT 140010059]                   | 90.59 | 478 | 478 |
| fig 6666666.28482.peg.3972 | R019016 | (gi:224990596) glnA1 (JTY 2231) - glutamine synthetase [Mycobacterium bovis str. BCG str. Tokyo 172]                          | 90.59 | 478 | 478 |
| fig 6666666.28482.peg.3972 | R005808 | (gi:121638102) glnA1 (BCG 2237) - Glutamine synthetase glnA1 [Mycobacterium bovis str. BCG Pasteur 1173P2]                    | 90.59 | 478 | 478 |
| fig 6666666.28482.peg.3972 | R005807 | (gi:31793400) glnA1 (Mb2244) - GLUTAMINE SYNTHETASE GLNA1 (GLUTAMINE SYNTHASE) (GS-I) [Mycobacterium bovis str. AF2122/97]    | 90.59 | 478 | 478 |
| fig 6666666.28482.peg.3972 | R019013 | (gi:339632248) glnA1 (MAF 22320) - Glutamine synthetase GLNA1 (Glutamine synthase) [Mycobacterium africanum str. GM041182]    | 90.59 | 478 | 478 |
| fig 6666666.28482.peg.3972 | R005811 | (gi:15827444) glnA1 (ML0925) - glutamine synthase class I . [Mycobacterium leprae str. TN]                                    | 88.7  | 478 | 478 |

|                            |         |                                                                                                                                 |       |     |     |
|----------------------------|---------|---------------------------------------------------------------------------------------------------------------------------------|-------|-----|-----|
| fig 6666666.28482.peg.3972 | R019017 | (gi:221229921) glnA1 (MLBr 00925) - glutamine synthase class I [Mycobacterium leprae str. Br4923]                               | 88.7  | 478 | 478 |
| fig 6666666.28482.peg.3972 | R005815 | (gi:120404556) glnA1 (Mvan 3585) - glutamine synthetase, type I [Mycobacterium vanbaalenii str. PYR-1]                          | 85.15 | 478 | 478 |
| fig 6666666.28482.peg.3972 | R005814 | (gi:145223515) glnA1 (Mflv 2928) - glutamine synthetase, type I [Mycobacterium gilvum str. PYR-GCK]                             | 84.1  | 478 | 478 |
| fig 6666666.28482.peg.3972 | R005813 | (gi:118467956) glnA1 (MSMEG 4290) - glutamine synthetase, type I [Mycobacterium smegmatis str. MC2 155]                         | 84.1  | 478 | 478 |
| fig 6666666.28482.peg.3972 | R005818 | (gi:108800286) glnA1 (Mmcs 3320) - glutamine synthetase, type I [Mycobacterium sp. str. MCS]                                    | 83.89 | 478 | 478 |
| fig 6666666.28482.peg.3972 | R005817 | (gi:119869414) glnA1 (Mkms 3382) - glutamine synthetase, type I [Mycobacterium sp. str. KMS]                                    | 83.89 | 478 | 478 |
| fig 6666666.28482.peg.3972 | R005816 | (gi:126435909) glnA1 (Mjls 3331) - glutamine synthetase, type I [Mycobacterium sp. str. JLS]                                    | 83.89 | 478 | 478 |
| fig 6666666.28482.peg.3972 | R019012 | (gi:169629021) glnA1 (MAB 1933c) - glutamine synthetase, type I (GlnA1) [Mycobacterium abscessus str. ATCC 19977]               | 82.01 | 478 | 478 |
| fig 6666666.28482.peg.3972 | R019018 | (gi:333992818) glnA1 (JDM601 4178) - glutamine synthetase [Mycobacterium sp. str. JDM601]                                       | 81.74 | 471 | 478 |
| fig 6666666.28482.peg.3972 | R019019 | (gi:333990322) glnA1 (JDM601 1682) - glutamine synthetase [Mycobacterium sp. str. JDM601]                                       | 79.5  | 478 | 478 |
| fig 6666666.28482.peg.4172 | R019185 | (gi:169631326) sodC (MAB 4248c) - hypothetical protein [Mycobacterium abscessus str. ATCC 19977]                                | 60.8  | 199 | 212 |
| fig 6666666.28482.peg.4230 | R019275 | (gi:169628052) prrB (MAB 0955c) - sensor histidine kinase PrrB [Mycobacterium abscessus str. ATCC 19977]                        | 70.25 | 436 | 443 |
| fig 6666666.28482.peg.4230 | R019274 | (gi:183984601) prrB (MMAR 4634) - two-component sensor histidine kinase PrrB [Mycobacterium marinum str. M]                     | 61.01 | 432 | 443 |
| fig 6666666.28482.peg.4230 | R019281 | (gi:333989462) prrB (JDM601 0822) - two-component sensor histidine kinase [Mycobacterium sp. str. JDM601]                       | 60.37 | 430 | 443 |
| fig 6666666.28482.peg.4230 | R019278 | (gi:253800074) prrB (TBMG 03087) - two component system sensor histidine kinase prrB [Mycobacterium tuberculosis str. KZN 1435] | 60.78 | 432 | 443 |
| fig 6666666.28482.peg.4230 | R006246 | (gi:15608042) prrB (Rv0902c) - TWO COMPONENT SENSOR HISTIDINE KINASE PRRB [Mycobacterium tuberculosis str. H37Rv]               | 60.78 | 432 | 443 |



|                            |         |                                                                                                                            |       |     |     |
|----------------------------|---------|----------------------------------------------------------------------------------------------------------------------------|-------|-----|-----|
| fig 6666666.28482.peg.4230 | R006247 | (gi:148660680) prrB (MRA 0909) - two component sensor histidine kinase PrrB [Mycobacterium tuberculosis str. H37Ra]        | 60.78 | 432 | 443 |
| fig 6666666.28482.peg.4230 | R013506 | (gi:148822111) prrB (TBFG 10920) - two component system sensor histidine kinase prrB [Mycobacterium tuberculosis str. F11] | 60.78 | 432 | 443 |
| fig 6666666.28482.peg.4230 | R019277 | (gi:340625913) prrB (MCAN 09021) - two component sensor histidine kinase PRRB [Mycobacterium canettii str. CIPT 140010059] | 60.78 | 432 | 443 |
| fig 6666666.28482.peg.4230 | R019279 | (gi:224989296) prrB (JTY 0924) - two component sensor histidine kinase [Mycobacterium bovis str. BCG str. Tokyo 172]       | 60.78 | 432 | 443 |
| fig 6666666.28482.peg.4230 | R006250 | (gi:121636825) prrB (BCG 0954c) - Two component sensor histidine kinase prrB [Mycobacterium bovis str. BCG Pasteur 1173P2] | 60.78 | 432 | 443 |
| fig 6666666.28482.peg.4230 | R006249 | (gi:31792090) prrB (Mb0926c) - TWO COMPONENT SENSOR HISTIDINE KINASE PRRB [Mycobacterium bovis str. AF2122/97]             | 60.78 | 432 | 443 |
| fig 6666666.28482.peg.4230 | R019276 | (gi:339630967) prrB (MAF 09110) - two component sensor histidine kinase PRRB [Mycobacterium africanum str. GM041182]       | 60.78 | 432 | 443 |
| fig 6666666.28482.peg.4230 | R006248 | (gi:15840321) prrB (MT0925) - sensor histidine kinase [Mycobacterium tuberculosis str. CDC1551]                            | 60.78 | 432 | 443 |
| fig 6666666.28482.peg.4230 | R006254 | (gi:118616127) prrB (MUL 0249) - two component sensor histidine kinase PrrB [Mycobacterium ulcerans str. Agy99]            | 60.78 | 432 | 443 |
| fig 6666666.28482.peg.4230 | R006253 | (gi:15828140) prrB (ML2124) - sensor histidine kinase [Mycobacterium leprae str. TN]                                       | 60.32 | 432 | 443 |
| fig 6666666.28482.peg.4230 | R019280 | (gi:221230617) prrB (MLBr 02124) - sensor histidine kinase [Mycobacterium leprae str. Br4923]                              | 60.32 | 432 | 443 |
| fig 6666666.28482.peg.4230 | R006252 | (gi:118464817) prrB (MAV 1021) - sensor-type histidine kinase PrrB [Mycobacterium avium str. 104]                          | 60.83 | 408 | 443 |
| fig 6666666.28482.peg.4230 | R006255 | (gi:118472850) prrB (MSMEG 5663) - sensor-type histidine kinase PrrB [Mycobacterium smegmatis str. MC2 155]                | 61.71 | 394 | 443 |
| fig 6666666.28482.peg.4258 | R005155 | (gi:126435345) pcaA (Mjls 2765) - Cyclopropane-fatty-acyl-phospholipid synthase [Mycobacterium sp. str. JLS]               | 84.01 | 294 | 294 |
| fig 6666666.28482.peg.4258 | R005157 | (gi:108799701) pcaA (Mmcs 2735) - Cyclopropane-fatty-acyl-phospholipid synthase [Mycobacterium sp. str. MCS]               | 84.01 | 294 | 294 |
| fig 6666666.28482.peg.4258 | R005156 | (gi:119868811) pcaA (Mkms 2779) - Cyclopropane-fatty-acyl-phospholipid synthase [Mycobacterium sp. str. KMS]               | 84.01 | 294 | 294 |

|                            |         |                                                                                                                                            |       |     |     |
|----------------------------|---------|--------------------------------------------------------------------------------------------------------------------------------------------|-------|-----|-----|
| fig 6666666.28482.peg.4258 | R005154 | (gi:120404005) <i>pcaA</i> (Mvan 3025) - Cyclopropane-fatty-acyl-phospholipid synthase [Mycobacterium vanbaalenii str. PYR-1]              | 76.11 | 293 | 294 |
| fig 6666666.28482.peg.4258 | R005153 | (gi:145223891) <i>pcaA</i> (Mflv 3304) - Cyclopropane-fatty-acyl-phospholipid synthase [Mycobacterium gilvum str. PYR-GCK]                 | 75.43 | 293 | 294 |
| fig 6666666.28482.peg.4258 | R005152 | (gi:118619634) <i>pcaA</i> (MUL 4539) - mycolic acid synthase <i>PcaA</i> [Mycobacterium ulcerans str. Agy99]                              | 70.98 | 286 | 294 |
| fig 6666666.28482.peg.4258 | R018707 | (gi:183980820) <i>pcaA</i> (MMAR 0796) - mycolic acid synthase <i>PcaA</i> [Mycobacterium marinum str. M]                                  | 70.98 | 286 | 294 |
| fig 6666666.28482.peg.4258 | R005151 | (gi:15828331) <i>pcaA</i> (ML2459) - Mycolic acid synthase [Mycobacterium leprae str. TN]                                                  | 69.58 | 286 | 294 |
| fig 6666666.28482.peg.4258 | R018712 | (gi:221230808) <i>pcaA</i> (MLBr 02459) - Mycolic acid synthase [Mycobacterium leprae str. Br4923]                                         | 69.58 | 286 | 294 |
| fig 6666666.28482.peg.4258 | R005167 | (gi:108797926) <i>cmaA2</i> (Mmcs 0952) - Cyclopropane-fatty-acyl-phospholipid synthase [Mycobacterium sp. str. MCS]                       | 70.67 | 283 | 294 |
| fig 6666666.28482.peg.4258 | R018710 | (gi:253797397) <i>pcaA</i> (TBMG 00472) - mycolic acid synthase <i>PcaA</i> [Mycobacterium tuberculosis str. KZN 1435]                     | 68.88 | 286 | 294 |
| fig 6666666.28482.peg.4258 | R005144 | (gi:57116736) <i>pcaA</i> (Rv0470c) - MYCOLIC ACID SYNTHASE <i>PCAA</i> (CYCLOPROPANE SYNTHASE) [Mycobacterium tuberculosis str. H37Rv]    | 68.88 | 286 | 294 |
| fig 6666666.28482.peg.4258 | R005145 | (gi:148660236) <i>pcaA</i> (MRA 0476) - mycolic acid synthase <i>PcaA</i> [Mycobacterium tuberculosis str. H37Ra]                          | 68.88 | 286 | 294 |
| fig 6666666.28482.peg.4258 | R013397 | (gi:148821668) <i>pcaA</i> (TBF 10477) - mycolic acid synthase <i>pcaA</i> (cyclopropane synthase) [Mycobacterium tuberculosis str. F11]   | 68.88 | 286 | 294 |
| fig 6666666.28482.peg.4258 | R005146 | (gi:15839858) <i>pcaA</i> (MT0486) - mycolic acid synthase [Mycobacterium tuberculosis str. CDC1551]                                       | 68.88 | 286 | 294 |
| fig 6666666.28482.peg.4258 | R018709 | (gi:340625496) <i>pcaA</i> (MCAN 04691) - mycolic acid synthase <i>PCAA</i> [Mycobacterium canettii str. CIPT 140010059]                   | 68.88 | 286 | 294 |
| fig 6666666.28482.peg.4258 | R005148 | (gi:121636385) <i>pcaA</i> (BCG 0510c) - Mycolic acid synthase <i>pcaA</i> [Mycobacterium bovis str. BCG Pasteur 1173P2]                   | 68.88 | 286 | 294 |
| fig 6666666.28482.peg.4258 | R005147 | (gi:31791649) <i>pcaA</i> (Mb0479c) - MYCOLIC ACID SYNTHASE <i>PCAA</i> (CYCLOPROPANE SYNTHASE) [Mycobacterium bovis str. AF2122/97]       | 68.88 | 286 | 294 |
| fig 6666666.28482.peg.4258 | R018708 | (gi:339630539) <i>pcaA</i> (MAF 04730) - mycolic acid synthase <i>PCAA</i> (cyclopropane synthase) [Mycobacterium africanum str. GM041182] | 68.88 | 286 | 294 |

|                            |         |                                                                                                                        |       |     |     |
|----------------------------|---------|------------------------------------------------------------------------------------------------------------------------|-------|-----|-----|
| fig 6666666.28482.peg.4258 | R018711 | (gi:224988857) <i>pcaA</i> (JTY 0480) - mycolic acid synthase [Mycobacterium bovis str. BCG str. Tokyo 172]            | 68.88 | 286 | 294 |
| fig 6666666.28482.peg.4258 | R005149 | (gi:41410062) <i>pcaA</i> (MAP3964c) - UmaA2 [Mycobacterium avium str. K-10 (subsp. paratuberculosis)]                 | 67.48 | 286 | 294 |
| fig 6666666.28482.peg.4258 | R005150 | (gi:118465677) <i>pcaA</i> (MAV 4679) - cyclopropane-fatty-acyl-phospholipid synthase 1 [Mycobacterium avium str. 104] | 68.2  | 283 | 294 |
| fig 6666666.28482.peg.4258 | R018713 | (gi:333989092) <i>pcaA</i> (JDM601 0452) - mycolic acid synthase PcaA [Mycobacterium sp. str. JDM601]                  | 64.39 | 277 | 294 |
| fig 6666666.28482.peg.4258 | R018720 | (gi:333990669) <i>cmaA2</i> (JDM601 2029) - methoxy mycolic acid synthase [Mycobacterium sp. str. JDM601]              | 63.19 | 283 | 294 |
| fig 6666666.28482.peg.4258 | R005165 | (gi:15828307) <i>cmaA2</i> (ML2426) - cyclopropane mycolic acid synthase [Mycobacterium leprae str. TN]                | 60.75 | 283 | 294 |
| fig 6666666.28482.peg.4258 | R018719 | (gi:221230784) <i>cmaA2</i> (MLBr 02426) - cyclopropane mycolic acid synthase [Mycobacterium leprae str. Br4923]       | 60.75 | 283 | 294 |
| fig 6666666.28482.peg.4409 | R019862 | (gi:183982677) PE18 (MMAR 2670) - PE family protein, PE19 1 [Mycobacterium marinum str. M]                             | 90.8  | 87  | 99  |
| fig 6666666.28482.peg.4409 | R018659 | (gi:118618471) PE18 (MUL 3088) - PE family protein [Mycobacterium ulcerans str. Agy99]                                 | 89.66 | 87  | 99  |
| fig 6666666.28482.peg.4409 | R018680 | (gi:41407605) PE19 (MAP1507) - hypothetical protein [Mycobacterium avium str. K-10 (subsp. paratuberculosis)]          | 88.51 | 87  | 99  |
| fig 6666666.28482.peg.4409 | R019865 | (gi:253799172) PE18 (TBMG 02209) - PE family protein [Mycobacterium tuberculosis str. KZN 1435]                        | 91.95 | 87  | 99  |
| fig 6666666.28482.peg.4409 | R018654 | (gi:57116910) PE18 (Rv1788) - PE family protein [Mycobacterium tuberculosis str. H37Rv]                                | 91.95 | 87  | 99  |
| fig 6666666.28482.peg.4409 | R018655 | (gi:148661595) PE18 (MRA 1802) - PE family protein [Mycobacterium tuberculosis str. H37Ra]                             | 91.95 | 87  | 99  |
| fig 6666666.28482.peg.4409 | R018653 | (gi:148823003) PE18 (TBFG 11818) - PE family protein [Mycobacterium tuberculosis str. F11]                             | 91.95 | 87  | 99  |
| fig 6666666.28482.peg.4409 | R018656 | (gi:15841256) PE18 (MT1837) - PE family protein [Mycobacterium tuberculosis str. CDC1551]                              | 91.95 | 87  | 99  |
| fig 6666666.28482.peg.4409 | R019864 | (gi:340626800) PE18 (MCAN 18061) - PE family protein [Mycobacterium canettii str. CIPT 140010059]                      | 91.95 | 87  | 99  |

|                            |         |                                                                                                   |       |    |    |
|----------------------------|---------|---------------------------------------------------------------------------------------------------|-------|----|----|
| fig 6666666.28482.peg.4409 | R019866 | (gi:224990173) PE18 (JTY 1804) - PE family protein [Mycobacterium bovis str. BCG str. Tokyo 172]  | 91.95 | 87 | 99 |
| fig 6666666.28482.peg.4409 | R018658 | (gi:121637689) PE18 (BCG 1820) - PE family protein [Mycobacterium bovis str. BCG Pasteur 1173P2]  | 91.95 | 87 | 99 |
| fig 6666666.28482.peg.4409 | R018657 | (gi:31792976) PE18 (Mb1816) - PE family protein [Mycobacterium bovis str. AF2122/97]              | 91.95 | 87 | 99 |
| fig 6666666.28482.peg.4409 | R019863 | (gi:339631842) PE18 (MAF 18100) - PE family protein [Mycobacterium africanum str. GM041182]       | 91.95 | 87 | 99 |
| fig 6666666.28482.peg.4409 | R019877 | (gi:183982680) PE19 (MMAR 2673) - PE family protein, PE19 [Mycobacterium marinum str. M]          | 89.66 | 87 | 99 |
| fig 6666666.28482.peg.4409 | R018675 | (gi:57116913) PE19 (Rv1791) - PE family protein [Mycobacterium tuberculosis str. H37Rv]           | 87.36 | 87 | 99 |
| fig 6666666.28482.peg.4409 | R018676 | (gi:148661598) PE19 (MRA 1805) - PE family protein [Mycobacterium tuberculosis str. H37Ra]        | 87.36 | 87 | 99 |
| fig 6666666.28482.peg.4409 | R019879 | (gi:340626803) PE19 (MCAN 18091) - PE family protein [Mycobacterium canettii str. CIPT 140010059] | 87.36 | 87 | 99 |
| fig 6666666.28482.peg.4409 | R019881 | (gi:224990176) PE19 (JTY 1807) - PE family protein [Mycobacterium bovis str. BCG str. Tokyo 172]  | 87.36 | 87 | 99 |
| fig 6666666.28482.peg.4409 | R018679 | (gi:121637692) PE19 (BCG 1823) - PE family protein [Mycobacterium bovis str. BCG Pasteur 1173P2]  | 87.36 | 87 | 99 |
| fig 6666666.28482.peg.4409 | R018678 | (gi:31792979) PE19 (Mb1819) - PE family protein [Mycobacterium bovis str. AF2122/97]              | 87.36 | 87 | 99 |
| fig 6666666.28482.peg.4409 | R019878 | (gi:339631845) PE19 (MAF 18130) - PE family protein [Mycobacterium africanum str. GM041182]       | 87.36 | 87 | 99 |
| fig 6666666.28482.peg.4409 | R019880 | (gi:253799168) PE19 (TBMG 02205) - PE family protein [Mycobacterium tuberculosis str. KZN 1435]   | 87.36 | 87 | 99 |
| fig 6666666.28482.peg.4409 | R018674 | (gi:148823006) PE19 (TBFG 11821) - PE family protein [Mycobacterium tuberculosis str. F11]        | 87.36 | 87 | 99 |
| fig 6666666.28482.peg.4409 | R018677 | (gi:15841261) PE19 (MT1840) - PE family protein [Mycobacterium tuberculosis str. CDC1551]         | 87.36 | 87 | 99 |
| fig 6666666.28482.peg.4409 | R019867 | (gi:333990534) PE18 (JDM601 1894) - PE-PGRS family protein [Mycobacterium sp. str. JDM601]        | 87.36 | 87 | 99 |

|                            |         |                                                                                                                                 |       |    |    |
|----------------------------|---------|---------------------------------------------------------------------------------------------------------------------------------|-------|----|----|
| fig 6666666.28482.peg.4410 | R014041 | (gi:118464008) esxM (MAV 2922) - hypothetical protein [Mycobacterium avium str. 104]                                            | 97.96 | 98 | 98 |
| fig 6666666.28482.peg.4410 | R019810 | (gi:340626804) esxM (MCAN 18101) - ESAT-6 like protein ESXM [Mycobacterium canettii str. CIPT 140010059]                        | 87.76 | 98 | 98 |
| fig 6666666.28482.peg.4410 | R019812 | (gi:224990177) esxM (JTY 1808) - hypothetical protein [Mycobacterium bovis str. BCG str. Tokyo 172]                             | 87.76 | 98 | 98 |
| fig 6666666.28482.peg.4410 | R014040 | (gi:121637693) esxM (BCG 1824) - hypothetical protein [Mycobacterium bovis str. BCG Pasteur 1173P2]                             | 87.76 | 98 | 98 |
| fig 6666666.28482.peg.4410 | R014039 | (gi:31792980) esxM (Mb1820) - hypothetical protein [Mycobacterium bovis str. AF2122/97]                                         | 87.76 | 98 | 98 |
| fig 6666666.28482.peg.4410 | R019809 | (gi:339631846) esxM (MAF 18140) - ESAT-6 like protein ESXM [Mycobacterium africanum str. GM041182]                              | 87.76 | 98 | 98 |
| fig 6666666.28482.peg.4410 | R019811 | (gi:253799760) esxM (TBMG 02785) - esat-6 like protein esxK [Mycobacterium tuberculosis str. KZN 1435]                          | 86.73 | 98 | 98 |
| fig 6666666.28482.peg.4410 | R019808 | (gi:183982681) esxM (MMAR 2674) - EsaT-6 like protein EsxM [Mycobacterium marinum str. M]                                       | 86.46 | 96 | 98 |
| fig 6666666.28482.peg.4410 | R014042 | (gi:118618466) esxM (MUL 3083) - EsaT-6 like protein EsxM [Mycobacterium ulcerans str. Agy99]                                   | 84.69 | 96 | 98 |
| fig 6666666.28482.peg.4411 | R014035 | (gi:118463289) esxN (MAV 2921) - hypothetical protein [Mycobacterium avium str. 104]                                            | 95.74 | 94 | 94 |
| fig 6666666.28482.peg.4411 | R019816 | (gi:253799165) esxN (TBMG 02203) - esat-6 like protein esxN [Mycobacterium tuberculosis str. KZN 1435]                          | 94.68 | 94 | 94 |
| fig 6666666.28482.peg.4411 | R014030 | (gi:57116914) esxN (Rv1793) - PUTATIVE ESAT-6 LIKE PROTEIN ESXN (ESAT-6 LIKE PROTEIN 5) [Mycobacterium tuberculosis str. H37Rv] | 94.68 | 94 | 94 |
| fig 6666666.28482.peg.4411 | R014031 | (gi:148661599) esxN (MRA 1806) - putative esat-6 like protein EsxN [Mycobacterium tuberculosis str. H37Ra]                      | 94.68 | 94 | 94 |
| fig 6666666.28482.peg.4411 | R014029 | (gi:148823007) esxN (TBFG 11824) - Esat-6 like protein esxN (Esat-6 like protein 5) [Mycobacterium tuberculosis str. F11]       | 94.68 | 94 | 94 |
| fig 6666666.28482.peg.4411 | R014032 | (gi:15841262) esxN (MT1842) - hypothetical protein [Mycobacterium tuberculosis str. CDC1551]                                    | 94.68 | 94 | 94 |
| fig 6666666.28482.peg.4411 | R019815 | (gi:340626805) esxN (MCAN 18111) - putative ESAT-6 like protein ESXN [Mycobacterium canettii str. CIPT 140010059]               | 94.68 | 94 | 94 |

|                            |         |                                                                                                                                     |       |     |     |
|----------------------------|---------|-------------------------------------------------------------------------------------------------------------------------------------|-------|-----|-----|
| fig 6666666.28482.peg.4411 | R019817 | (gi:224990178) esxN (JTY 1809) - putative EsaT-6 like protein 5 [Mycobacterium bovis str. BCG str. Tokyo 172]                       | 94.68 | 94  | 94  |
| fig 6666666.28482.peg.4411 | R014034 | (gi:121637694) esxN (BCG 1825) - putative ESAT-6 like protein 5 [Mycobacterium bovis str. BCG Pasteur 1173P2]                       | 94.68 | 94  | 94  |
| fig 6666666.28482.peg.4411 | R014033 | (gi:31792981) esxN (Mb1821) - PUTATIVE ESAT-6 LIKE PROTEIN 5 [Mycobacterium bovis str. AF2122/97]                                   | 94.68 | 94  | 94  |
| fig 6666666.28482.peg.4411 | R019814 | (gi:339631847) esxN (MAF 18150) - putative ESAT-6 like protein ESXN (ESAT-6 like protein 5) [Mycobacterium africanum str. GM041182] | 94.68 | 94  | 94  |
| fig 6666666.28482.peg.4411 | R014036 | (gi:118618465) esxN (MUL 3082) - EsaT-6 like protein EsxN [Mycobacterium ulcerans str. Agy99]                                       | 93.62 | 94  | 94  |
| fig 6666666.28482.peg.4411 | R019813 | (gi:183982682) esxN (MMAR 2675) - EsaT-6 like protein EsxN [Mycobacterium marinum str. M]                                           | 93.62 | 94  | 94  |
| fig 6666666.28482.peg.4411 | R019818 | (gi:333990536) esxN (JDM601 1896) - EsaT-6 like protein EsxN [Mycobacterium sp. str. JDM601]                                        | 87.23 | 94  | 94  |
| fig 6666666.28482.peg.4423 | R019446 | (gi:183984950) mce4F (MMAR 4982) - MCE-family protein Mce4F [Mycobacterium marinum str. M]                                          | 81.85 | 573 | 573 |
| fig 6666666.28482.peg.4423 | R006690 | (gi:118619247) mce4F (MUL 4057) - MCE-family protein Mce4F [Mycobacterium ulcerans str. Agy99]                                      | 81.15 | 573 | 573 |
| fig 6666666.28482.peg.4423 | R006689 | (gi:41406667) mce4F (MAP0569) - hypothetical protein [Mycobacterium avium str. K-10 (subsp. paratuberculosis)]                      | 91.52 | 506 | 573 |
| fig 6666666.28482.peg.4423 | R019450 | (gi:253800536) mce4F (TBMG 03539) - MCE-family protein mce4F [Mycobacterium tuberculosis str. KZN 1435]                             | 86.22 | 450 | 573 |
| fig 6666666.28482.peg.4423 | R006684 | (gi:15610630) mce4F (Rv3494c) - MCE-FAMILY PROTEIN MCE4F [Mycobacterium tuberculosis str. H37Rv]                                    | 86.22 | 450 | 573 |
| fig 6666666.28482.peg.4423 | R006685 | (gi:148663358) mce4F (MRA 3534) - MCE-family protein Mce4F [Mycobacterium tuberculosis str. H37Ra]                                  | 86.22 | 450 | 573 |
| fig 6666666.28482.peg.4423 | R013535 | (gi:148824701) mce4F (TBFG 13528) - MCE-family protein mce4F [Mycobacterium tuberculosis str. F11]                                  | 86.22 | 450 | 573 |
| fig 6666666.28482.peg.4423 | R006686 | (gi:15843106) mce4F (MT3598) - virulence factor mce family protein [Mycobacterium tuberculosis str. CDC1551]                        | 86.22 | 450 | 573 |
| fig 6666666.28482.peg.4423 | R019449 | (gi:340628462) mce4F (MCAN 35081) - MCE-family protein MCE4F [Mycobacterium canettii str. CIPT 140010059]                           | 86.22 | 450 | 573 |

|                            |         |                                                                                                                |       |     |     |
|----------------------------|---------|----------------------------------------------------------------------------------------------------------------|-------|-----|-----|
| fig 6666666.28482.peg.4423 | R019448 | (gi:339633497) mce4F (MAF 35070) - MCE-family protein MCE4F [Mycobacterium africanum str. GM041182]            | 86.22 | 450 | 573 |
| fig 6666666.28482.peg.4423 | R019451 | (gi:224991909) mce4F (JTY 3558) - MCE-family protein [Mycobacterium bovis str. BCG str. Tokyo 172]             | 86.22 | 450 | 573 |
| fig 6666666.28482.peg.4423 | R006688 | (gi:121639413) mce4F (BCG 3558c) - Mce-family protein mce4F [Mycobacterium bovis str. BCG Pasteur 1173P2]      | 86.22 | 450 | 573 |
| fig 6666666.28482.peg.4423 | R006687 | (gi:31794670) mce4F (Mb3524c) - MCE-FAMILY PROTEIN MCE4F [Mycobacterium bovis str. AF2122/97]                  | 86.22 | 450 | 573 |
| fig 6666666.28482.peg.4423 | R006691 | (gi:118467558) mce4F (MSMEG 5895) - virulence factor mce family protein [Mycobacterium smegmatis str. MC2 155] | 71    | 438 | 573 |
| fig 6666666.28482.peg.4423 | R006692 | (gi:145222153) mce4F (Mflv 1561) - virulence factor Mce family protein [Mycobacterium gilvum str. PYR-GCK]     | 68.26 | 438 | 573 |
| fig 6666666.28482.peg.4423 | R006693 | (gi:120406145) mce4F (Mvan 5197) - virulence factor Mce family protein [Mycobacterium vanbaalenii str. PYR-1]  | 66.67 | 438 | 573 |
| fig 6666666.28482.peg.4423 | R006694 | (gi:126437559) mce4F (Mjls 4995) - virulence factor Mce family protein [Mycobacterium sp. str. JLS]            | 66.21 | 438 | 573 |
| fig 6666666.28482.peg.4423 | R006696 | (gi:108801575) mce4F (Mmcs 4612) - Mammalian cell entry [Mycobacterium sp. str. MCS]                           | 65.53 | 438 | 573 |
| fig 6666666.28482.peg.4423 | R006695 | (gi:119870729) mce4F (Mkms 4700) - virulence factor Mce family protein [Mycobacterium sp. str. KMS]            | 65.53 | 438 | 573 |
| fig 6666666.28482.peg.4423 | R019452 | (gi:333992265) mce4F (JDM601 3625) - MCE-family protein Mce4F [Mycobacterium sp. str. JDM601]                  | 65.38 | 438 | 573 |
| fig 6666666.28482.peg.4423 | R019447 | (gi:169631226) mce4F (MAB 4148c) - MCE-family protein [Mycobacterium abscessus str. ATCC 19977]                | 65.97 | 429 | 573 |
| fig 6666666.28482.peg.4424 | R006675 | (gi:41406666) mce4E (MAP0568) - LprN [Mycobacterium avium str. K-10 (subsp. paratuberculosis)]                 | 87.5  | 384 | 388 |
| fig 6666666.28482.peg.4424 | R006676 | (gi:118464340) mce4E (MAV 0661) - virulence factor Mce family protein [Mycobacterium avium str. 104]           | 87.66 | 381 | 388 |
| fig 6666666.28482.peg.4424 | R019439 | (gi:183984951) mce4E (MMAR 4983) - MCE family lipoprotein LprN [Mycobacterium marinum str. M]                  | 81.72 | 383 | 388 |
| fig 6666666.28482.peg.4424 | R006677 | (gi:118619248) mce4E (MUL 4058) - MCE-family lipoprotein LprN [Mycobacterium ulcerans str. Agy99]              | 81.72 | 383 | 388 |

|                            |         |                                                                                                                                                |       |     |     |
|----------------------------|---------|------------------------------------------------------------------------------------------------------------------------------------------------|-------|-----|-----|
| fig 6666666.28482.peg.4424 | R019443 | (gi:253800537) mce4E (TBMG 03540) - MCE-family lipoprotein mce4E [Mycobacterium tuberculosis str. KZN 1435]                                    | 81.25 | 384 | 388 |
| fig 6666666.28482.peg.4424 | R006670 | (gi:15610631) mce4E (Rv3495c) - POSSIBLE MCE-FAMILY LIPOPROTEIN LPRN (MCE-FAMILY LIPOPROTEIN MCE4E) [Mycobacterium tuberculosis str. H37Rv]    | 81.25 | 384 | 388 |
| fig 6666666.28482.peg.4424 | R006671 | (gi:148663359) mce4E (MRA 3535) - MCE-family lipoprotein LprN [Mycobacterium tuberculosis str. H37Ra]                                          | 81.25 | 384 | 388 |
| fig 6666666.28482.peg.4424 | R013534 | (gi:148824702) mce4E (TBFG 13529) - MCE-family lipoprotein lprN (MCE-family lipoprotein mce4e) [Mycobacterium tuberculosis str. F11]           | 81.25 | 384 | 388 |
| fig 6666666.28482.peg.4424 | R006672 | (gi:15843107) mce4E (MT3599) - virulence factor mce family protein [Mycobacterium tuberculosis str. CDC1551]                                   | 81.25 | 384 | 388 |
| fig 6666666.28482.peg.4424 | R019444 | (gi:224991910) mce4E (JTY 3559) - putative MCE-family lipoprotein [Mycobacterium bovis str. BCG str. Tokyo 172]                                | 81.25 | 384 | 388 |
| fig 6666666.28482.peg.4424 | R006674 | (gi:121639414) mce4E (BCG 3559c) - putative mce-family lipoprotein lprN [Mycobacterium bovis str. BCG Pasteur 1173P2]                          | 81.25 | 384 | 388 |
| fig 6666666.28482.peg.4424 | R006673 | (gi:31794671) mce4E (Mb3525c) - POSSIBLE MCE-FAMILY LIPOPROTEIN LPRN (MCE-FAMILY LIPOPROTEIN MCE4E) [Mycobacterium bovis str. AF2122/97]       | 81.25 | 384 | 388 |
| fig 6666666.28482.peg.4424 | R019441 | (gi:339633498) mce4E (MAF 35080) - putative MCE-family lipoprotein LPRN (MCE-family lipoprotein MCE4E) [Mycobacterium africanum str. GM041182] | 81.25 | 384 | 388 |
| fig 6666666.28482.peg.4424 | R019442 | (gi:340628463) mce4E (MCAN 35091) - putative MCE-family lipoprotein LPRN [Mycobacterium canettii str. CIPT 140010059]                          | 80.99 | 384 | 388 |
| fig 6666666.28482.peg.4424 | R006683 | (gi:108801576) mce4E (Mmcs 4613) - Mammalian cell entry [Mycobacterium sp. str. MCS]                                                           | 69.95 | 386 | 388 |
| fig 6666666.28482.peg.4424 | R006682 | (gi:119870730) mce4E (Mkms 4701) - virulence factor Mce family protein [Mycobacterium sp. str. KMS]                                            | 69.95 | 386 | 388 |
| fig 6666666.28482.peg.4424 | R006681 | (gi:126437560) mce4E (Mjls 4996) - virulence factor Mce family protein [Mycobacterium sp. str. JLS]                                            | 69.43 | 386 | 388 |
| fig 6666666.28482.peg.4424 | R006680 | (gi:120406146) mce4E (Mvan 5198) - virulence factor Mce family protein [Mycobacterium vanbaalenii str. PYR-1]                                  | 68.73 | 371 | 388 |
| fig 6666666.28482.peg.4424 | R006678 | (gi:118470887) mce4E (MSMEG 5896) - virulence factor Mce family protein [Mycobacterium smegmatis str. MC2 155]                                 | 65.97 | 382 | 388 |



|                            |         |                                                                                                                |       |     |     |
|----------------------------|---------|----------------------------------------------------------------------------------------------------------------|-------|-----|-----|
| fig 6666666.28482.peg.4424 | R006679 | (gi:145222152) mce4E (Mflv 1560) - virulence factor Mce family protein [Mycobacterium gilvum str. PYR-GCK]     | 67.12 | 371 | 388 |
| fig 6666666.28482.peg.4424 | R019445 | (gi:333992266) mce4E (JDM601 3626) - MCE family lipoprotein LprN [Mycobacterium sp. str. JDM601]               | 65.09 | 381 | 388 |
| fig 6666666.28482.peg.4425 | R006662 | (gi:118462453) mce4D (MAV 0660) - virulence factor mce family protein [Mycobacterium avium str. 104]           | 86.97 | 422 | 465 |
| fig 6666666.28482.peg.4425 | R006661 | (gi:41406665) mce4D (MAP0567) - hypothetical protein [Mycobacterium avium str. K-10 (subsp. paratuberculosis)] | 86.73 | 422 | 465 |
| fig 6666666.28482.peg.4425 | R019435 | (gi:340628464) mce4D (MCAN 35101) - MCE-family protein MCE4D [Mycobacterium canettii str. CIPT 140010059]      | 81.77 | 417 | 465 |
| fig 6666666.28482.peg.4425 | R019436 | (gi:253800538) mce4D (TBMG 03541) - MCE-family protein mce4D [Mycobacterium tuberculosis str. KZN 1435]        | 81.77 | 417 | 465 |
| fig 6666666.28482.peg.4425 | R006656 | (gi:15610632) mce4D (Rv3496c) - MCE-FAMILY PROTEIN MCE4D [Mycobacterium tuberculosis str. H37Rv]               | 81.77 | 417 | 465 |
| fig 6666666.28482.peg.4425 | R006657 | (gi:148663360) mce4D (MRA 3536) - MCE-family protein Mce4D [Mycobacterium tuberculosis str. H37Ra]             | 81.77 | 417 | 465 |
| fig 6666666.28482.peg.4425 | R013533 | (gi:148824703) mce4D (TBFG 13530) - MCE-family protein mce4D [Mycobacterium tuberculosis str. F11]             | 81.77 | 417 | 465 |
| fig 6666666.28482.peg.4425 | R019437 | (gi:224991911) mce4D (JTY 3560) - MCE-family protein [Mycobacterium bovis str. BCG str. Tokyo 172]             | 81.77 | 417 | 465 |
| fig 6666666.28482.peg.4425 | R006660 | (gi:121639415) mce4D (BCG 3560c) - Mce-family protein mce4D [Mycobacterium bovis str. BCG Pasteur 1173P2]      | 81.77 | 417 | 465 |
| fig 6666666.28482.peg.4425 | R006659 | (gi:31794672) mce4D (Mb3526c) - MCE-FAMILY PROTEIN MCE4D [Mycobacterium bovis str. AF2122/97]                  | 81.77 | 417 | 465 |
| fig 6666666.28482.peg.4425 | R019434 | (gi:339633499) mce4D (MAF 35090) - MCE-family protein MCE4D [Mycobacterium africanum str. GM041182]            | 81.77 | 417 | 465 |
| fig 6666666.28482.peg.4425 | R006658 | (gi:15843108) mce4D (MT3600) - virulence factor mce family protein [Mycobacterium tuberculosis str. CDC1551]   | 81.77 | 417 | 465 |
| fig 6666666.28482.peg.4425 | R019432 | (gi:183984952) mce4D (MMAR 4984) - MCE-family protein Mce4D [Mycobacterium marinum str. M]                     | 80.43 | 418 | 465 |
| fig 6666666.28482.peg.4425 | R006663 | (gi:118619249) mce4D (MUL 4059) - MCE-family protein Mce4D [Mycobacterium ulcerans str. Agy99]                 | 80.19 | 418 | 465 |

|                            |         |                                                                                                                |       |     |     |
|----------------------------|---------|----------------------------------------------------------------------------------------------------------------|-------|-----|-----|
| fig 6666666.28482.peg.4425 | R006665 | (gi:145222151) mce4D (Mflv 1559) - virulence factor Mce family protein [Mycobacterium gilvum str. PYR-GCK]     | 63.64 | 418 | 465 |
| fig 6666666.28482.peg.4425 | R006664 | (gi:118470654) mce4D (MSMEG 5897) - virulence factor mce family protein [Mycobacterium smegmatis str. MC2 155] | 66.02 | 415 | 465 |
| fig 6666666.28482.peg.4425 | R006666 | (gi:120406147) mce4D (Mvan 5199) - virulence factor Mce family protein [Mycobacterium vanbaalenii str. PYR-1]  | 63.16 | 418 | 465 |
| fig 6666666.28482.peg.4425 | R006667 | (gi:126437561) mce4D (Mjls 4997) - virulence factor Mce family protein [Mycobacterium sp. str. JLS]            | 63.07 | 417 | 465 |
| fig 6666666.28482.peg.4425 | R006669 | (gi:108801577) mce4D (Mmcs 4614) - Mammalian cell entry [Mycobacterium sp. str. MCS]                           | 62.11 | 417 | 465 |
| fig 6666666.28482.peg.4425 | R006668 | (gi:119870731) mce4D (Mkms 4702) - virulence factor Mce family protein [Mycobacterium sp. str. KMS]            | 62.11 | 417 | 465 |
| fig 6666666.28482.peg.4425 | R019438 | (gi:333992267) mce4D (JDM601 3627) - MCE-family protein Mce4D [Mycobacterium sp. str. JDM601]                  | 61.84 | 411 | 465 |
| fig 6666666.28482.peg.4426 | R006647 | (gi:41406664) mce4C (MAP0566) - hypothetical protein [Mycobacterium avium str. K-10 (subsp. paratuberculosis)] | 92.37 | 354 | 354 |
| fig 6666666.28482.peg.4426 | R006648 | (gi:118464170) mce4C (MAV 0659) - virulence factor Mce family protein [Mycobacterium avium str. 104]           | 91.81 | 354 | 354 |
| fig 6666666.28482.peg.4426 | R019429 | (gi:253800539) mce4C (TBMG 03542) - MCE-family protein mce4C [Mycobacterium tuberculosis str. KZN 1435]        | 82.34 | 351 | 354 |
| fig 6666666.28482.peg.4426 | R006642 | (gi:15610633) mce4C (Rv3497c) - MCE-FAMILY PROTEIN MCE4C [Mycobacterium tuberculosis str. H37Rv]               | 82.34 | 351 | 354 |
| fig 6666666.28482.peg.4426 | R006643 | (gi:148663361) mce4C (MRA 3537) - MCE-family protein Mce4C [Mycobacterium tuberculosis str. H37Ra]             | 82.34 | 351 | 354 |
| fig 6666666.28482.peg.4426 | R013532 | (gi:148824704) mce4C (TBFG 13531) - MCE-family protein mce4C [Mycobacterium tuberculosis str. F11]             | 82.34 | 351 | 354 |
| fig 6666666.28482.peg.4426 | R006644 | (gi:15843109) mce4C (MT3601) - virulence factor mce family protein [Mycobacterium tuberculosis str. CDC1551]   | 82.34 | 351 | 354 |
| fig 6666666.28482.peg.4426 | R019428 | (gi:340628465) mce4C (MCAN 35111) - MCE-family protein MCE4C [Mycobacterium canettii str. CIPT 140010059]      | 82.34 | 351 | 354 |
| fig 6666666.28482.peg.4426 | R006645 | (gi:31794673) mce4C (Mb3527c) - MCE-FAMILY PROTEIN MCE4C [Mycobacterium bovis str. AF2122/97]                  | 82.34 | 351 | 354 |

|                            |         |                                                                                                                |       |     |     |
|----------------------------|---------|----------------------------------------------------------------------------------------------------------------|-------|-----|-----|
| fig 6666666.28482.peg.4426 | R019427 | (gi:339633500) mce4C (MAF 35100) - MCE-family protein MCE4C [Mycobacterium africanum str. GM041182]            | 82.34 | 351 | 354 |
| fig 6666666.28482.peg.4426 | R019430 | (gi:224991912) mce4C (JTY 3561) - MCE-family protein [Mycobacterium bovis str. BCG str. Tokyo 172]             | 82.34 | 351 | 354 |
| fig 6666666.28482.peg.4426 | R006646 | (gi:121639416) mce4C (BCG 3561c) - Mce-family protein mce4C [Mycobacterium bovis str. BCG Pasteur 1173P2]      | 82.34 | 351 | 354 |
| fig 6666666.28482.peg.4426 | R019425 | (gi:183984953) mce4C (MMAR 4985) - MCE-family protein Mce4C [Mycobacterium marinum str. M]                     | 81.77 | 351 | 354 |
| fig 6666666.28482.peg.4426 | R006649 | (gi:118619250) mce4C (MUL 4060) - MCE-family protein Mce4C [Mycobacterium ulcerans str. Agy99]                 | 80.86 | 350 | 354 |
| fig 6666666.28482.peg.4426 | R006655 | (gi:108801578) mce4C (Mmcs 4615) - Mammalian cell entry [Mycobacterium sp. str. MCS]                           | 69.57 | 345 | 354 |
| fig 6666666.28482.peg.4426 | R006654 | (gi:119870732) mce4C (Mkms 4703) - virulence factor Mce family protein [Mycobacterium sp. str. KMS]            | 69.57 | 345 | 354 |
| fig 6666666.28482.peg.4426 | R006652 | (gi:120406148) mce4C (Mvan 5200) - virulence factor Mce family protein [Mycobacterium vanbaalenii str. PYR-1]  | 66.95 | 351 | 354 |
| fig 6666666.28482.peg.4426 | R006651 | (gi:145222150) mce4C (Mflv 1558) - virulence factor Mce family protein [Mycobacterium gilvum str. PYR-GCK]     | 67.72 | 347 | 354 |
| fig 6666666.28482.peg.4426 | R006653 | (gi:126437562) mce4C (Mjls 4998) - virulence factor Mce family protein [Mycobacterium sp. str. JLS]            | 68.12 | 345 | 354 |
| fig 6666666.28482.peg.4426 | R006650 | (gi:118471840) mce4C (MSMEG 5898) - virulence factor Mce family protein [Mycobacterium smegmatis str. MC2 155] | 66.38 | 348 | 354 |
| fig 6666666.28482.peg.4426 | R019426 | (gi:169631229) mce4C (MAB 4151c) - MCE-family protein [Mycobacterium abscessus str. ATCC 19977]                | 65.23 | 348 | 354 |
| fig 6666666.28482.peg.4426 | R019431 | (gi:333992268) mce4C (JDM601 3628) - MCE-family protein Mce4C [Mycobacterium sp. str. JDM601]                  | 65.75 | 327 | 354 |
| fig 6666666.28482.peg.4427 | R006634 | (gi:118463448) mce4B (MAV 0658) - virulence factor Mce family protein [Mycobacterium avium str. 104]           | 91.43 | 350 | 350 |
| fig 6666666.28482.peg.4427 | R006633 | (gi:41406663) mce4B (MAP0565) - hypothetical protein [Mycobacterium avium str. K-10 (subsp. paratuberculosis)] | 91.14 | 350 | 350 |
| fig 6666666.28482.peg.4427 | R019422 | (gi:253800540) mce4B (TBMG 03543) - MCE-family protein mce4B [Mycobacterium tuberculosis str. KZN 1435]        | 82    | 350 | 350 |

|                            |         |                                                                                                                |       |     |     |
|----------------------------|---------|----------------------------------------------------------------------------------------------------------------|-------|-----|-----|
| fig 6666666.28482.peg.4427 | R006628 | (gi:15610634) mce4B (Rv3498c) - MCE-FAMILY PROTEIN MCE4B [Mycobacterium tuberculosis str. H37Rv]               | 82    | 350 | 350 |
| fig 6666666.28482.peg.4427 | R006629 | (gi:148663362) mce4B (MRA 3538) - MCE-family protein Mce4B [Mycobacterium tuberculosis str. H37Ra]             | 82    | 350 | 350 |
| fig 6666666.28482.peg.4427 | R013531 | (gi:148824705) mce4B (TBFG 13532) - MCE-family protein mce4B [Mycobacterium tuberculosis str. F11]             | 82    | 350 | 350 |
| fig 6666666.28482.peg.4427 | R006630 | (gi:15843110) mce4B (MT3602) - virulence factor mce family protein [Mycobacterium tuberculosis str. CDC1551]   | 82    | 350 | 350 |
| fig 6666666.28482.peg.4427 | R019421 | (gi:340628466) mce4B (MCAN 35121) - MCE-family protein MCE4B [Mycobacterium canettii str. CIPT 140010059]      | 82    | 350 | 350 |
| fig 6666666.28482.peg.4427 | R019423 | (gi:224991913) mce4B (JTY 3562) - MCE-family protein [Mycobacterium bovis str. BCG str. Tokyo 172]             | 82    | 350 | 350 |
| fig 6666666.28482.peg.4427 | R006632 | (gi:121639417) mce4B (BCG 3562c) - Mce-family protein mce4B [Mycobacterium bovis str. BCG Pasteur 1173P2]      | 82    | 350 | 350 |
| fig 6666666.28482.peg.4427 | R006631 | (gi:31794674) mce4B (Mb3528c) - MCE-FAMILY PROTEIN MCE4B [Mycobacterium bovis str. AF2122/97]                  | 82    | 350 | 350 |
| fig 6666666.28482.peg.4427 | R019420 | (gi:339633501) mce4B (MAF 35110) - MCE-family protein MCE4B [Mycobacterium africanum str. GM041182]            | 82    | 350 | 350 |
| fig 6666666.28482.peg.4427 | R019418 | (gi:183984954) mce4B (MMAR 4986) - MCE-family protein Mce4B [Mycobacterium marinum str. M]                     | 83.43 | 350 | 350 |
| fig 6666666.28482.peg.4427 | R006635 | (gi:118619251) mce4B (MUL 4061) - MCE-family protein Mce4B [Mycobacterium ulcerans str. Agy99]                 | 82.86 | 350 | 350 |
| fig 6666666.28482.peg.4427 | R006641 | (gi:108801579) mce4B (Mmcs 4616) - Mammalian cell entry [Mycobacterium sp. str. MCS]                           | 72.54 | 335 | 350 |
| fig 6666666.28482.peg.4427 | R006640 | (gi:119870733) mce4B (Mkms 4704) - virulence factor Mce family protein [Mycobacterium sp. str. KMS]            | 72.54 | 335 | 350 |
| fig 6666666.28482.peg.4427 | R019424 | (gi:333992269) mce4B (JDM601 3629) - MCE-family protein Mce4B [Mycobacterium sp. str. JDM601]                  | 67.16 | 341 | 350 |
| fig 6666666.28482.peg.4427 | R006636 | (gi:118473663) mce4B (MSMEG 5899) - virulence factor Mce family protein [Mycobacterium smegmatis str. MC2 155] | 69.88 | 342 | 350 |
| fig 6666666.28482.peg.4427 | R006637 | (gi:145222149) mce4B (Mflv 1557) - virulence factor Mce family protein [Mycobacterium gilvum str. PYR-GCK]     | 68.42 | 342 | 350 |

|                            |         |                                                                                                               |       |     |     |
|----------------------------|---------|---------------------------------------------------------------------------------------------------------------|-------|-----|-----|
| fig 6666666.28482.peg.4427 | R006638 | (gi:120406149) mce4B (Mvan 5201) - virulence factor Mce family protein [Mycobacterium vanbaalenii str. PYR-1] | 69.53 | 338 | 350 |
| fig 6666666.28482.peg.4427 | R006639 | (gi:126437563) mce4B (Mjls 4999) - virulence factor Mce family protein [Mycobacterium sp. str. JLS]           | 72.54 | 335 | 350 |
| fig 6666666.28482.peg.4427 | R019419 | (gi:169631230) mce4B (MAB 4152c) - MCE-family protein [Mycobacterium abscessus str. ATCC 19977]               | 66.67 | 339 | 350 |
| fig 6666666.28482.peg.4428 | R006620 | (gi:118464721) mce4A (MAV 0657) - virulence factor Mce family protein [Mycobacterium avium str. 104]          | 85.94 | 384 | 400 |
| fig 6666666.28482.peg.4428 | R006619 | (gi:41406662) mce4A (MAP0564) - Mce4 [Mycobacterium avium str. K-10 (subsp. paratuberculosis)]                | 86.54 | 379 | 400 |
| fig 6666666.28482.peg.4428 | R019415 | (gi:253800541) mce4A (TBMG 03544) - MCE-family protein mce4A [Mycobacterium tuberculosis str. KZN 1435]       | 83    | 400 | 400 |
| fig 6666666.28482.peg.4428 | R006614 | (gi:57117113) mce4A (Rv3499c) - MCE-FAMILY PROTEIN MCE4A [Mycobacterium tuberculosis str. H37Rv]              | 83    | 400 | 400 |
| fig 6666666.28482.peg.4428 | R006615 | (gi:148663363) mce4A (MRA 3539) - MCE-family protein Mce4A [Mycobacterium tuberculosis str. H37Ra]            | 83    | 400 | 400 |
| fig 6666666.28482.peg.4428 | R013530 | (gi:148824706) mce4A (TBFG 13533) - MCE-family protein mce4A [Mycobacterium tuberculosis str. F11]            | 83    | 400 | 400 |
| fig 6666666.28482.peg.4428 | R006616 | (gi:15843111) mce4A (MT3603) - virulence factor mce family protein [Mycobacterium tuberculosis str. CDC1551]  | 83    | 400 | 400 |
| fig 6666666.28482.peg.4428 | R019414 | (gi:340628467) mce4A (MCAN 35131) - MCE-family protein MCE4A [Mycobacterium canettii str. CIPT 140010059]     | 83    | 400 | 400 |
| fig 6666666.28482.peg.4428 | R019416 | (gi:224991914) mce4A (JTY 3563) - MCE-family protein [Mycobacterium bovis str. BCG str. Tokyo 172]            | 83    | 400 | 400 |
| fig 6666666.28482.peg.4428 | R006618 | (gi:121639418) mce4A (BCG 3563c) - Mce-family protein mce4A [Mycobacterium bovis str. BCG Pasteur 1173P2]     | 83    | 400 | 400 |
| fig 6666666.28482.peg.4428 | R006617 | (gi:31794675) mce4A (Mb3529c) - MCE-FAMILY PROTEIN MCE4A [Mycobacterium bovis str. AF2122/97]                 | 83    | 400 | 400 |
| fig 6666666.28482.peg.4428 | R019413 | (gi:339633502) mce4A (MAF 35120) - MCE-family protein MCE4A [Mycobacterium africanum str. GM041182]           | 83    | 400 | 400 |
| fig 6666666.28482.peg.4428 | R019411 | (gi:183984955) mce4A (MMAR 4987) - MCE-family protein Mce4A [Mycobacterium marinum str. M]                    | 84.25 | 400 | 400 |

|                            |         |                                                                                                                   |       |     |     |
|----------------------------|---------|-------------------------------------------------------------------------------------------------------------------|-------|-----|-----|
| fig 6666666.28482.peg.4428 | R006621 | (gi:118619252) mce4A (MUL 4062) - MCE-family protein Mce4A [Mycobacterium ulcerans str. Agy99]                    | 83.75 | 400 | 400 |
| fig 6666666.28482.peg.4428 | R006622 | (gi:118470324) mce4A (MSMEG 5900) - virulence factor Mce family protein [Mycobacterium smegmatis str. MC2 155]    | 64.75 | 400 | 400 |
| fig 6666666.28482.peg.4428 | R006625 | (gi:126437564) mce4A (Mjls 5000) - virulence factor Mce family protein [Mycobacterium sp. str. JLS]               | 65.5  | 400 | 400 |
| fig 6666666.28482.peg.4428 | R006627 | (gi:108801580) mce4A (Mmcs 4617) - Mammalian cell entry [Mycobacterium sp. str. MCS]                              | 65.25 | 400 | 400 |
| fig 6666666.28482.peg.4428 | R006626 | (gi:119870734) mce4A (Mkms 4705) - virulence factor Mce family protein [Mycobacterium sp. str. KMS]               | 66.22 | 373 | 400 |
| fig 6666666.28482.peg.4428 | R019417 | (gi:333992270) mce4A (JDM601 3630) - MCE-family protein Mce4A [Mycobacterium sp. str. JDM601]                     | 60.51 | 390 | 400 |
| fig 6666666.28482.peg.4428 | R006623 | (gi:145222148) mce4A (Mflv 1556) - virulence factor Mce family protein [Mycobacterium gilvum str. PYR-GCK]        | 64    | 400 | 400 |
| fig 6666666.28482.peg.4428 | R006624 | (gi:120406150) mce4A (Mvan 5202) - virulence factor Mce family protein [Mycobacterium vanbaalenii str. PYR-1]     | 64.25 | 400 | 400 |
| fig 6666666.28482.peg.4557 | R005720 | (gi:118466952) panD (MAV 0552) - aspartate 1-decarboxylase [Mycobacterium avium str. 104]                         | 93.66 | 138 | 139 |
| fig 6666666.28482.peg.4557 | R005725 | (gi:120406311) panD (Mvan 5363) - aspartate 1-decarboxylase [Mycobacterium vanbaalenii str. PYR-1]                | 91.11 | 135 | 139 |
| fig 6666666.28482.peg.4557 | R018971 | (gi:333992530) panD (JDM601 3890) - aspartate 1-decarboxylase precursor PanD [Mycobacterium sp. str. JDM601]      | 90.58 | 138 | 139 |
| fig 6666666.28482.peg.4557 | R018964 | (gi:183985072) panD (MMAR 5104) - aspartate alpha-decarboxylase [Mycobacterium marinum str. M]                    | 90.85 | 138 | 139 |
| fig 6666666.28482.peg.4557 | R018968 | (gi:253800641) panD (TBMG 03639) - aspartate alpha-decarboxylase [Mycobacterium tuberculosis str. KZN 1435]       | 90.44 | 136 | 139 |
| fig 6666666.28482.peg.4557 | R005714 | (gi:15610737) panD (Rv3601c) - aspartate 1-decarboxylase precursor [Mycobacterium tuberculosis str. H37Rv]        | 90.44 | 136 | 139 |
| fig 6666666.28482.peg.4557 | R005715 | (gi:148663465) panD (MRA 3640) - aspartate 1-decarboxylase precursor [Mycobacterium tuberculosis str. H37Ra]      | 90.44 | 136 | 139 |
| fig 6666666.28482.peg.4557 | R013451 | (gi:148824806) panD (TBFG 13633) - aspartate 1-decarboxylase precursor panD [Mycobacterium tuberculosis str. F11] | 90.44 | 136 | 139 |

|                            |         |                                                                                                                                                             |       |     |     |
|----------------------------|---------|-------------------------------------------------------------------------------------------------------------------------------------------------------------|-------|-----|-----|
| fig 6666666.28482.peg.4557 | R005716 | (gi:15843213) panD (MT3706.1) - aspartate 1-decarboxylase precursor [Mycobacterium tuberculosis str. CDC1551]                                               | 90.44 | 136 | 139 |
| fig 6666666.28482.peg.4557 | R018969 | (gi:224992017) panD (JTY 3666) - aspartate alpha-decarboxylase [Mycobacterium bovis str. BCG str. Tokyo 172]                                                | 90.44 | 136 | 139 |
| fig 6666666.28482.peg.4557 | R005718 | (gi:121639520) panD (BCG 3665c) - putative aspartate 1-decarboxylase precursor panD [Mycobacterium bovis str. BCG Pasteur 1173P2]                           | 90.44 | 136 | 139 |
| fig 6666666.28482.peg.4557 | R005717 | (gi:31794777) panD (Mb3631c) - aspartate 1-decarboxylase precursor [Mycobacterium bovis str. AF2122/97]                                                     | 90.44 | 136 | 139 |
| fig 6666666.28482.peg.4557 | R018966 | (gi:339633600) panD (MAF 36140) - putative aspartate 1-decarboxylase precursor PAND (aspartate alpha-decarboxylase) [Mycobacterium africanum str. GM041182] | 90.44 | 136 | 139 |
| fig 6666666.28482.peg.4557 | R018967 | (gi:340628566) panD (MCAN 36131) - putative aspartate 1-decarboxylase PAND [Mycobacterium canettii str. CIPT 140010059]                                     | 90.44 | 136 | 139 |
| fig 6666666.28482.peg.4557 | R005722 | (gi:118619357) panD (MUL 4183) - aspartate 1-decarboxylase precursor PanD [Mycobacterium ulcerans str. Agy99]                                               | 90.58 | 134 | 139 |
| fig 6666666.28482.peg.4557 | R005721 | (gi:15827028) panD (ML0231) - aspartate 1-decarboxylase precursor [Mycobacterium leprae str. TN]                                                            | 87.94 | 138 | 139 |
| fig 6666666.28482.peg.4557 | R018970 | (gi:221229506) panD (MLBr 00231) - aspartate alpha-decarboxylase [Mycobacterium leprae str. Br4923]                                                         | 87.94 | 138 | 139 |
| fig 6666666.28482.peg.4557 | R005728 | (gi:108801724) panD (Mmcs 4761) - aspartate 1-decarboxylase [Mycobacterium sp. str. MCS]                                                                    | 86.67 | 135 | 139 |
| fig 6666666.28482.peg.4557 | R005727 | (gi:119870875) panD (Mkms 4847) - aspartate 1-decarboxylase [Mycobacterium sp. str. KMS]                                                                    | 86.67 | 135 | 139 |
| fig 6666666.28482.peg.4557 | R005726 | (gi:126437711) panD (Mjls 5147) - aspartate 1-decarboxylase [Mycobacterium sp. str. JLS]                                                                    | 86.67 | 135 | 139 |
| fig 6666666.28482.peg.4557 | R018965 | (gi:169627646) panD (MAB 0542) - aspartate 1-decarboxylase precursor [Mycobacterium abscessus str. ATCC 19977]                                              | 78.99 | 135 | 139 |
| fig 6666666.28482.peg.4557 | R005723 | (gi:118473676) panD (MSMEG 0021) - aspartate 1-decarboxylase [Mycobacterium smegmatis str. MC2 155]                                                         | 63.91 | 132 | 139 |
| fig 6666666.28482.peg.4558 | R018956 | (gi:183985073) panC (MMAR 5105) - pantoate--beta-alanine ligase [Mycobacterium marinum str. M]                                                              | 77.42 | 307 | 309 |
| fig 6666666.28482.peg.4558 | R005707 | (gi:118619358) panC (MUL 4184) - pantoate--beta-alanine ligase PanC [Mycobacterium ulcerans str. Agy99]                                                     | 77.42 | 307 | 309 |

|                            |         |                                                                                                                                                 |       |     |     |
|----------------------------|---------|-------------------------------------------------------------------------------------------------------------------------------------------------|-------|-----|-----|
| fig 6666666.28482.peg.4558 | R005704 | (gi:41406554) panC (MAP0456) - pantoate--beta-alanine ligase [Mycobacterium avium str. K-10 (subsp. paratuberculosis)]                          | 79.29 | 309 | 309 |
| fig 6666666.28482.peg.4558 | R005705 | (gi:118462570) panC (MAV 0551) - pantoate--beta-alanine ligase [Mycobacterium avium str. 104]                                                   | 78.96 | 309 | 309 |
| fig 6666666.28482.peg.4558 | R018960 | (gi:253800642) panC (TBMG 03640) - pantoate--beta-alanine ligase [Mycobacterium tuberculosis str. KZN 1435]                                     | 81.76 | 307 | 309 |
| fig 6666666.28482.peg.4558 | R005699 | (gi:15610738) panC (Rv3602c) - pantoate--beta-alanine ligase [Mycobacterium tuberculosis str. H37Rv]                                            | 81.76 | 307 | 309 |
| fig 6666666.28482.peg.4558 | R005700 | (gi:148663466) panC (MRA 3641) - pantoate--beta-alanine ligase [Mycobacterium tuberculosis str. H37Ra]                                          | 81.76 | 307 | 309 |
| fig 6666666.28482.peg.4558 | R013450 | (gi:148824807) panC (TBFG 13634) - pantoate-beta-alanine ligase panC [Mycobacterium tuberculosis str. F11]                                      | 81.76 | 307 | 309 |
| fig 6666666.28482.peg.4558 | R005701 | (gi:15843214) panC (MT3707) - pantoate--beta-alanine ligase [Mycobacterium tuberculosis str. CDC1551]                                           | 81.76 | 307 | 309 |
| fig 6666666.28482.peg.4558 | R018959 | (gi:340628567) panC (MCAN 36141) - putative pantoate--beta-alanine ligase [Mycobacterium canettii str. CIPT 140010059]                          | 81.43 | 307 | 309 |
| fig 6666666.28482.peg.4558 | R018961 | (gi:224992018) panC (JTY 3667) - pantoate--beta-alanine ligase [Mycobacterium bovis str. BCG str. Tokyo 172]                                    | 81.76 | 307 | 309 |
| fig 6666666.28482.peg.4558 | R005703 | (gi:121639521) panC (BCG 3666c) - putative pantoate--beta-alanine ligase panC [Mycobacterium bovis str. BCG Pasteur 1173P2]                     | 81.76 | 307 | 309 |
| fig 6666666.28482.peg.4558 | R005702 | (gi:31794778) panC (Mb3632c) - pantoate--beta-alanine ligase [Mycobacterium bovis str. AF2122/97]                                               | 81.76 | 307 | 309 |
| fig 6666666.28482.peg.4558 | R018958 | (gi:339633601) panC (MAF 36150) - putative pantoate--beta-alanine ligase PANC (pantothenate synthetase) [Mycobacterium africanum str. GM041182] | 81.76 | 307 | 309 |
| fig 6666666.28482.peg.4558 | R005709 | (gi:145222016) panC (Mflv 1424) - pantoate--beta-alanine ligase [Mycobacterium gilvum str. PYR-GCK]                                             | 68.51 | 307 | 309 |
| fig 6666666.28482.peg.4558 | R005713 | (gi:108801725) panC (Mmcs 4762) - pantoate--beta-alanine ligase [Mycobacterium sp. str. MCS]                                                    | 71.48 | 305 | 309 |
| fig 6666666.28482.peg.4558 | R005712 | (gi:119870876) panC (Mkms 4848) - pantoate--beta-alanine ligase [Mycobacterium sp. str. KMS]                                                    | 71.48 | 305 | 309 |
| fig 6666666.28482.peg.4558 | R005711 | (gi:126437712) panC (Mjls 5148) - pantoate--beta-alanine ligase [Mycobacterium sp. str. JLS]                                                    | 71.15 | 305 | 309 |



|                            |         |                                                                                                                                     |       |     |     |
|----------------------------|---------|-------------------------------------------------------------------------------------------------------------------------------------|-------|-----|-----|
| fig 6666666.28482.peg.4558 | R018957 | (gi:169627645) panC (MAB 0541) - pantoate--beta-alanine ligase [Mycobacterium abscessus str. ATCC 19977]                            | 69.87 | 302 | 309 |
| fig 6666666.28482.peg.4558 | R018963 | (gi:333992531) panC (JDM601 3891) - pantoate-beta-alanine ligase PanC [Mycobacterium sp. str. JDM601]                               | 75.44 | 285 | 309 |
| fig 6666666.28482.peg.4558 | R005706 | (gi:15827027) panC (ML0230) - pantoate--beta-alanine ligase [Mycobacterium leprae str. TN]                                          | 76.72 | 305 | 309 |
| fig 6666666.28482.peg.4558 | R018962 | (gi:221229505) panC (MLBr 00230) - pantoate--beta-alanine ligase [Mycobacterium leprae str. Br4923]                                 | 76.72 | 305 | 309 |
| fig 6666666.28482.peg.4558 | R005710 | (gi:120406312) panC (Mvan 5364) - pantoate--beta-alanine ligase [Mycobacterium vanbaalenii str. PYR-1]                              | 68.71 | 308 | 309 |
| fig 6666666.28482.peg.4558 | R005708 | (gi:118467890) panC (MSMEG 6097) - pantoate--beta-alanine ligase [Mycobacterium smegmatis str. MC2 155]                             | 68.61 | 308 | 309 |
| fig 6666666.28482.peg.4571 | R019816 | (gi:253799165) esxN (TBMG 02203) - esat-6 like protein esxN [Mycobacterium tuberculosis str. KZN 1435]                              | 91.49 | 94  | 94  |
| fig 6666666.28482.peg.4571 | R014030 | (gi:57116914) esxN (Rv1793) - PUTATIVE ESAT-6 LIKE PROTEIN ESXN (ESAT-6 LIKE PROTEIN 5) [Mycobacterium tuberculosis str. H37Rv]     | 91.49 | 94  | 94  |
| fig 6666666.28482.peg.4571 | R014031 | (gi:148661599) esxN (MRA 1806) - putative esat-6 like protein EsxN [Mycobacterium tuberculosis str. H37Ra]                          | 91.49 | 94  | 94  |
| fig 6666666.28482.peg.4571 | R014029 | (gi:148823007) esxN (TBFG 11824) - Esat-6 like protein esxN (Esat-6 like protein 5) [Mycobacterium tuberculosis str. F11]           | 91.49 | 94  | 94  |
| fig 6666666.28482.peg.4571 | R014032 | (gi:15841262) esxN (MT1842) - hypothetical protein [Mycobacterium tuberculosis str. CDC1551]                                        | 91.49 | 94  | 94  |
| fig 6666666.28482.peg.4571 | R019815 | (gi:340626805) esxN (MCAN 18111) - putative ESAT-6 like protein ESXN [Mycobacterium canettii str. CIPT 140010059]                   | 91.49 | 94  | 94  |
| fig 6666666.28482.peg.4571 | R019817 | (gi:224990178) esxN (JTY 1809) - putative EsaT-6 like protein 5 [Mycobacterium bovis str. BCG str. Tokyo 172]                       | 91.49 | 94  | 94  |
| fig 6666666.28482.peg.4571 | R014034 | (gi:121637694) esxN (BCG 1825) - putative ESAT-6 like protein 5 [Mycobacterium bovis str. BCG Pasteur 1173P2]                       | 91.49 | 94  | 94  |
| fig 6666666.28482.peg.4571 | R014033 | (gi:31792981) esxN (Mb1821) - PUTATIVE ESAT-6 LIKE PROTEIN 5 [Mycobacterium bovis str. AF2122/97]                                   | 91.49 | 94  | 94  |
| fig 6666666.28482.peg.4571 | R019814 | (gi:339631847) esxN (MAF 18150) - putative ESAT-6 like protein ESXN (ESAT-6 like protein 5) [Mycobacterium africanum str. GM041182] | 91.49 | 94  | 94  |

|                            |         |                                                                                                               |       |     |     |
|----------------------------|---------|---------------------------------------------------------------------------------------------------------------|-------|-----|-----|
| fig 6666666.28482.peg.4571 | R014035 | (gi:118463289) esxN (MAV 2921) - hypothetical protein [Mycobacterium avium str. 104]                          | 90.43 | 94  | 94  |
| fig 6666666.28482.peg.4571 | R014036 | (gi:118618465) esxN (MUL 3082) - EsaT-6 like protein EsxN [Mycobacterium ulcerans str. Agy99]                 | 90.43 | 94  | 94  |
| fig 6666666.28482.peg.4571 | R019813 | (gi:183982682) esxN (MMAR 2675) - EsaT-6 like protein EsxN [Mycobacterium marinum str. M]                     | 90.43 | 94  | 94  |
| fig 6666666.28482.peg.4571 | R019818 | (gi:333990536) esxN (JDM601 1896) - EsaT-6 like protein EsxN [Mycobacterium sp. str. JDM601]                  | 85.11 | 94  | 94  |
| fig 6666666.28482.peg.4572 | R019810 | (gi:340626804) esxM (MCAN 18101) - ESAT-6 like protein ESXM [Mycobacterium canettii str. CIPT 140010059]      | 91.84 | 98  | 98  |
| fig 6666666.28482.peg.4572 | R019812 | (gi:224990177) esxM (JTY 1808) - hypothetical protein [Mycobacterium bovis str. BCG str. Tokyo 172]           | 91.84 | 98  | 98  |
| fig 6666666.28482.peg.4572 | R014040 | (gi:121637693) esxM (BCG 1824) - hypothetical protein [Mycobacterium bovis str. BCG Pasteur 1173P2]           | 91.84 | 98  | 98  |
| fig 6666666.28482.peg.4572 | R014039 | (gi:31792980) esxM (Mb1820) - hypothetical protein [Mycobacterium bovis str. AF2122/97]                       | 91.84 | 98  | 98  |
| fig 6666666.28482.peg.4572 | R019809 | (gi:339631846) esxM (MAF 18140) - ESAT-6 like protein ESXM [Mycobacterium africanum str. GM041182]            | 91.84 | 98  | 98  |
| fig 6666666.28482.peg.4572 | R019811 | (gi:253799760) esxM (TBMG 02785) - esat-6 like protein esxK [Mycobacterium tuberculosis str. KZN 1435]        | 90.82 | 98  | 98  |
| fig 6666666.28482.peg.4572 | R014041 | (gi:118464008) esxM (MAV 2922) - hypothetical protein [Mycobacterium avium str. 104]                          | 87.76 | 98  | 98  |
| fig 6666666.28482.peg.4572 | R019808 | (gi:183982681) esxM (MMAR 2674) - EsaT-6 like protein EsxM [Mycobacterium marinum str. M]                     | 90.62 | 96  | 98  |
| fig 6666666.28482.peg.4572 | R014042 | (gi:118618466) esxM (MUL 3083) - EsaT-6 like protein EsxM [Mycobacterium ulcerans str. Agy99]                 | 88.78 | 96  | 98  |
| fig 6666666.28482.peg.4589 | R005167 | (gi:108797926) cmaA2 (Mmcs 0952) - Cyclopropane-fatty-acyl-phospholipid synthase [Mycobacterium sp. str. MCS] | 70.88 | 285 | 288 |
| fig 6666666.28482.peg.4589 | R005152 | (gi:118619634) pcaA (MUL 4539) - mycolic acid synthase PcaA [Mycobacterium ulcerans str. Agy99]               | 67.71 | 288 | 288 |
| fig 6666666.28482.peg.4589 | R018707 | (gi:183980820) pcaA (MMAR 0796) - mycolic acid synthase PcaA [Mycobacterium marinum str. M]                   | 67.71 | 288 | 288 |

|                            |         |                                                                                                                                          |       |     |     |
|----------------------------|---------|------------------------------------------------------------------------------------------------------------------------------------------|-------|-----|-----|
| fig 6666666.28482.peg.4589 | R005150 | (gi:118465677) <i>pcaA</i> (MAV 4679) - cyclopropane-fatty-acyl-phospholipid synthase 1 [Mycobacterium avium str. 104]                   | 67.02 | 285 | 288 |
| fig 6666666.28482.peg.4589 | R005149 | (gi:41410062) <i>pcaA</i> (MAP3964c) - UmaA2 [Mycobacterium avium str. K-10 (subsp. paratuberculosis)]                                   | 66.32 | 288 | 288 |
| fig 6666666.28482.peg.4589 | R005151 | (gi:15828331) <i>pcaA</i> (ML2459) - Mycolic acid synthase [Mycobacterium leprae str. TN]                                                | 65.28 | 288 | 288 |
| fig 6666666.28482.peg.4589 | R018712 | (gi:221230808) <i>pcaA</i> (MLBr 02459) - Mycolic acid synthase [Mycobacterium leprae str. Br4923]                                       | 65.28 | 288 | 288 |
| fig 6666666.28482.peg.4589 | R018710 | (gi:253797397) <i>pcaA</i> (TBMG 00472) - mycolic acid synthase PcaA [Mycobacterium tuberculosis str. KZN 1435]                          | 64.58 | 288 | 288 |
| fig 6666666.28482.peg.4589 | R005144 | (gi:57116736) <i>pcaA</i> (Rv0470c) - MYCOLIC ACID SYNTHASE PCAA (CYCLOPROPANE SYNTHASE) [Mycobacterium tuberculosis str. H37Rv]         | 64.58 | 288 | 288 |
| fig 6666666.28482.peg.4589 | R005145 | (gi:148660236) <i>pcaA</i> (MRA 0476) - mycolic acid synthase PcaA [Mycobacterium tuberculosis str. H37Ra]                               | 64.58 | 288 | 288 |
| fig 6666666.28482.peg.4589 | R013397 | (gi:148821668) <i>pcaA</i> (TBF 10477) - mycolic acid synthase <i>pcaA</i> (cyclopropane synthase) [Mycobacterium tuberculosis str. F11] | 64.58 | 288 | 288 |
| fig 6666666.28482.peg.4589 | R005146 | (gi:15839858) <i>pcaA</i> (MT0486) - mycolic acid synthase [Mycobacterium tuberculosis str. CDC1551]                                     | 64.58 | 288 | 288 |
| fig 6666666.28482.peg.4589 | R018709 | (gi:340625496) <i>pcaA</i> (MCAN 04691) - mycolic acid synthase PCAA [Mycobacterium canettii str. CIPT 140010059]                        | 64.58 | 288 | 288 |
| fig 6666666.28482.peg.4589 | R005148 | (gi:121636385) <i>pcaA</i> (BCG 0510c) - Mycolic acid synthase <i>pcaA</i> [Mycobacterium bovis str. BCG Pasteur 1173P2]                 | 64.58 | 288 | 288 |
| fig 6666666.28482.peg.4589 | R005147 | (gi:31791649) <i>pcaA</i> (Mb0479c) - MYCOLIC ACID SYNTHASE PCAA (CYCLOPROPANE SYNTHASE) [Mycobacterium bovis str. AF2122/97]            | 64.58 | 288 | 288 |
| fig 6666666.28482.peg.4589 | R018708 | (gi:339630539) <i>pcaA</i> (MAF 04730) - mycolic acid synthase PCAA (cyclopropane synthase) [Mycobacterium africanum str. GM041182]      | 64.58 | 288 | 288 |
| fig 6666666.28482.peg.4589 | R018711 | (gi:224988857) <i>pcaA</i> (JTY 0480) - mycolic acid synthase [Mycobacterium bovis str. BCG str. Tokyo 172]                              | 64.24 | 288 | 288 |
| fig 6666666.28482.peg.4589 | R005154 | (gi:120404005) <i>pcaA</i> (Mvan 3025) - Cyclopropane-fatty-acyl-phospholipid synthase [Mycobacterium vanbaalenii str. PYR-1]            | 63.76 | 287 | 288 |
| fig 6666666.28482.peg.4589 | R005153 | (gi:145223891) <i>pcaA</i> (Mflv 3304) - Cyclopropane-fatty-acyl-phospholipid synthase [Mycobacterium gilvum str. PYR-GCK]               | 63.07 | 287 | 288 |

|                            |         |                                                                                                                                   |       |     |     |
|----------------------------|---------|-----------------------------------------------------------------------------------------------------------------------------------|-------|-----|-----|
| fig 6666666.28482.peg.4589 | R005155 | (gi:126435345) pcaA (Mjls 2765) - Cyclopropane-fatty-acyl-phospholipid synthase [Mycobacterium sp. str. JLS]                      | 65.16 | 287 | 288 |
| fig 6666666.28482.peg.4589 | R005157 | (gi:108799701) pcaA (Mmcs 2735) - Cyclopropane-fatty-acyl-phospholipid synthase [Mycobacterium sp. str. MCS]                      | 65.16 | 287 | 288 |
| fig 6666666.28482.peg.4589 | R005156 | (gi:119868811) pcaA (Mkms 2779) - Cyclopropane-fatty-acyl-phospholipid synthase [Mycobacterium sp. str. KMS]                      | 65.16 | 287 | 288 |
| fig 6666666.28482.peg.4639 | R019036 | (gi:169631178) mbtH (MAB 4100c) - MbtH-like protein [Mycobacterium abscessus str. ATCC 19977]                                     | 86.84 | 76  | 76  |
| fig 6666666.28482.peg.4639 | R019035 | (gi:183983167) mbtH (MMAR 3173) - protein MbtH [Mycobacterium marinum str. M]                                                     | 85.51 | 69  | 76  |
| fig 6666666.28482.peg.4639 | R019039 | (gi:253798546) mbtH (TBMG 01598) - hypothetical protein [Mycobacterium tuberculosis str. KZN 1435]                                | 79.71 | 69  | 76  |
| fig 6666666.28482.peg.4639 | R013460 | (gi:148823579) mbtH (TBFG 12402) - hypothetical mycobactin/exochelin synthesis protein mbtH [Mycobacterium tuberculosis str. F11] | 79.71 | 69  | 76  |
| fig 6666666.28482.peg.4639 | R005850 | (gi:15841889) mbtH (MT2445.1) - mbtH protein [Mycobacterium tuberculosis str. CDC1551]                                            | 79.71 | 69  | 76  |
| fig 6666666.28482.peg.4639 | R019038 | (gi:340627388) mbtH (MCAN 24091) - hypothetical protein [Mycobacterium canettii str. CIPT 140010059]                              | 79.71 | 69  | 76  |
| fig 6666666.28482.peg.4639 | R019040 | (gi:224990750) mbtH (JTY 2385) - hypothetical protein [Mycobacterium bovis str. BCG str. Tokyo 172]                               | 79.71 | 69  | 76  |
| fig 6666666.28482.peg.4639 | R005852 | (gi:121638256) mbtH (BCG 2391c) - putative protein mbtH [Mycobacterium bovis str. BCG Pasteur 1173P2]                             | 79.71 | 69  | 76  |
| fig 6666666.28482.peg.4639 | R005851 | (gi:31793554) mbtH (Mb2398c) - PUTATIVE CONSERVED PROTEIN MBTH [Mycobacterium bovis str. AF2122/97]                               | 79.71 | 69  | 76  |
| fig 6666666.28482.peg.4639 | R019037 | (gi:339632403) mbtH (MAF 23910) - putative conserved protein MBTH [Mycobacterium africanum str. GM041182]                         | 79.71 | 69  | 76  |
| fig 6666666.28482.peg.4639 | R005848 | (gi:15609514) mbtH (Rv2377c) - PUTATIVE CONSERVED PROTEIN MBTH [Mycobacterium tuberculosis str. H37Rv]                            | 78.26 | 69  | 76  |
| fig 6666666.28482.peg.4639 | R005849 | (gi:148662209) mbtH (MRA 2400) - protein MbtH [Mycobacterium tuberculosis str. H37Ra]                                             | 78.26 | 69  | 76  |
| fig 6666666.28482.peg.4639 | R005859 | (gi:126436052) mbtH (Mjls 3474) - MbtH domain protein [Mycobacterium sp. str. JLS]                                                | 77.14 | 70  | 76  |

|                            |         |                                                                                                                                              |       |     |     |
|----------------------------|---------|----------------------------------------------------------------------------------------------------------------------------------------------|-------|-----|-----|
| fig 6666666.28482.peg.4639 | R005861 | (gi:108800429) mbtH (Mmcs 3463) - MbtH-like protein [Mycobacterium sp. str. MCS]                                                             | 75.71 | 70  | 76  |
| fig 6666666.28482.peg.4639 | R005860 | (gi:119869558) mbtH (Mkms 3526) - MbtH domain protein [Mycobacterium sp. str. KMS]                                                           | 75.71 | 70  | 76  |
| fig 6666666.28482.peg.4639 | R005857 | (gi:145223286) mbtH (Mflv 2699) - MbtH-like protein [Mycobacterium gilvum str. PYR-GCK]                                                      | 73.24 | 71  | 76  |
| fig 6666666.28482.peg.4639 | R005856 | (gi:118470732) mbtH (MSMEG 4508) - hypothetical protein [Mycobacterium smegmatis str. MC2 155]                                               | 78.79 | 66  | 76  |
| fig 6666666.28482.peg.4639 | R019041 | (gi:333990185) mbtH (JDM601 1545) - MbtH-like protein [Mycobacterium sp. str. JDM601]                                                        | 72.37 | 73  | 76  |
| fig 6666666.28482.peg.4639 | R005855 | (gi:118618911) mbtH (MUL 3639) - conserved hypothetical protein MbtH 1 [Mycobacterium ulcerans str. Agy99]                                   | 69.01 | 71  | 76  |
| fig 6666666.28482.peg.4639 | R005853 | (gi:41408267) mbtH (MAP2169c) - MbtH 3 [Mycobacterium avium str. K-10 (subsp. paratuberculosis)]                                             | 70    | 70  | 76  |
| fig 6666666.28482.peg.4639 | R005854 | (gi:118464383) mbtH (MAV 2016) - hypothetical protein [Mycobacterium avium str. 104]                                                         | 70    | 70  | 76  |
| fig 6666666.28482.peg.4639 | R005858 | (gi:120404800) mbtH (Mvan 3842) - MbtH domain protein [Mycobacterium vanbaalenii str. PYR-1]                                                 | 68.49 | 69  | 76  |
| fig 6666666.28482.peg.4639 | R018198 | (gi:118469728) MSMEG0016 - hypothetical protein [Mycobacterium smegmatis str. MC2 155]                                                       | 62.32 | 66  | 76  |
| fig 6666666.28482.peg.4729 | R019176 | (gi:183982761) ahpC (MMAR 2755) - alkyl hydroperoxide reductase C protein AhpC [Mycobacterium marinum str. M]                                | 92.31 | 195 | 195 |
| fig 6666666.28482.peg.4729 | R019180 | (gi:253798492) ahpC (TBMG 01544) - alkyl hydroperoxide reductase C protein ahpC [Mycobacterium tuberculosis str. KZN 1435]                   | 92.31 | 195 | 195 |
| fig 6666666.28482.peg.4729 | R006078 | (gi:15609565) ahpC (Rv2428) - ALKYL HYDROPEROXIDE REDUCTASE C PROTEIN AHPC (ALKYL HYDROPEROXIDASE C) [Mycobacterium tuberculosis str. H37Rv] | 92.31 | 195 | 195 |
| fig 6666666.28482.peg.4729 | R006079 | (gi:148662263) ahpC (MRA 2455) - AhpC [Mycobacterium tuberculosis str. H37Ra]                                                                | 92.31 | 195 | 195 |
| fig 6666666.28482.peg.4729 | R013479 | (gi:148823631) ahpC (TBMG 12456) - alkyl hydroperoxide reductase C protein ahpC [Mycobacterium tuberculosis str. F11]                        | 92.31 | 195 | 195 |
| fig 6666666.28482.peg.4729 | R006080 | (gi:15841949) ahpC (MT2503) - alkyl hydroperoxide reductase C [Mycobacterium tuberculosis str. CDC1551]                                      | 92.31 | 195 | 195 |

|                            |         |                                                                                                                                                  |       |     |     |
|----------------------------|---------|--------------------------------------------------------------------------------------------------------------------------------------------------|-------|-----|-----|
| fig 6666666.28482.peg.4729 | R019179 | (gi:340627441) ahpC (MCAN 24661) - alkyl hydroperoxide reductase C protein [Mycobacterium canettii str. CIPT 140010059]                          | 92.31 | 195 | 195 |
| fig 6666666.28482.peg.4729 | R019181 | (gi:224990804) ahpC (JTY 2441) - alkyl hydroperoxide reductase C protein [Mycobacterium bovis str. BCG str. Tokyo 172]                           | 92.31 | 195 | 195 |
| fig 6666666.28482.peg.4729 | R006082 | (gi:121638310) ahpC (BCG 2447) - Alkyl hydroperoxide reductase C protein ahpC [Mycobacterium bovis str. BCG Pasteur 1173P2]                      | 92.31 | 195 | 195 |
| fig 6666666.28482.peg.4729 | R006081 | (gi:31793608) ahpC (Mb2454) - ALKYL HYDROPEROXIDE REDUCTASE C PROTEIN AHPC (ALKYL HYDROPEROXIDASE C) [Mycobacterium bovis str. AF2122/97]        | 92.31 | 195 | 195 |
| fig 6666666.28482.peg.4729 | R019178 | (gi:339632455) ahpC (MAF 24440) - alkyl hydroperoxide reductase C protein AHPC (alkyl hydroperoxidase C) [Mycobacterium africanum str. GM041182] | 92.31 | 195 | 195 |
| fig 6666666.28482.peg.4729 | R006084 | (gi:118467085) ahpC (MAV 2839) - alkylhydroperoxide reductase [Mycobacterium avium str. 104]                                                     | 91.79 | 195 | 195 |
| fig 6666666.28482.peg.4729 | R006083 | (gi:41407687) ahpC (MAP1589c) - AhpC [Mycobacterium avium str. K-10 (subsp. paratuberculosis)]                                                   | 91.28 | 195 | 195 |
| fig 6666666.28482.peg.4729 | R006086 | (gi:118618391) ahpC (MUL 2999) - alkyl hydroperoxide reductase C protein AhpC [Mycobacterium ulcerans str. Agy99]                                | 91.28 | 195 | 195 |
| fig 6666666.28482.peg.4729 | R006085 | (gi:15828102) ahpC (ML2042) - alkyl hydroperoxide reductase [Mycobacterium leprae str. TN]                                                       | 85.13 | 195 | 195 |
| fig 6666666.28482.peg.4729 | R019182 | (gi:221230579) ahpC (MLBr 02042) - alkyl hydroperoxide reductase [Mycobacterium leprae str. Br4923]                                              | 85.13 | 195 | 195 |
| fig 6666666.28482.peg.4729 | R006087 | (gi:118471486) ahpC (MSMEG 4891) - alkylhydroperoxide reductase [Mycobacterium smegmatis str. MC2 155]                                           | 84.02 | 194 | 195 |
| fig 6666666.28482.peg.4729 | R019183 | (gi:333990603) ahpC (JDM601 1963) - alkyl hydroperoxide reductase C protein AhpC [Mycobacterium sp. str. JDM601]                                 | 85.05 | 194 | 195 |
| fig 6666666.28482.peg.4729 | R019177 | (gi:169631483) ahpC (MAB 4408c) - putative alkylhydroperoxidase C [Mycobacterium abscessus str. ATCC 19977]                                      | 83.94 | 193 | 195 |
| fig 6666666.28482.peg.4761 | R005426 | (gi:41407707) fbpB (MAP1609c) - FbpB [Mycobacterium avium str. K-10 (subsp. paratuberculosis)]                                                   | 81.4  | 326 | 326 |
| fig 6666666.28482.peg.4761 | R005427 | (gi:118465697) fbpB (MAV 2816) - antigen 85-B [Mycobacterium avium str. 104]                                                                     | 81.1  | 326 | 326 |

|                            |         |                                                                                                                                                                                                                        |       |     |     |
|----------------------------|---------|------------------------------------------------------------------------------------------------------------------------------------------------------------------------------------------------------------------------|-------|-----|-----|
| fig 6666666.28482.peg.4761 | R018878 | (gi:333990613) fbpB (JDM601 1973) - hypothetical protein [Mycobacterium sp. str. JDM601]                                                                                                                               | 78.46 | 325 | 326 |
| fig 6666666.28482.peg.4761 | R018872 | (gi:183982783) fbpB (MMAR 2777) - secreted antigen 85-B FbpB [Mycobacterium marinum str. M]                                                                                                                            | 80.75 | 320 | 326 |
| fig 6666666.28482.peg.4761 | R005429 | (gi:118618369) fbpB (MUL 2970) - secreted antigen 85-B FbpB [Mycobacterium ulcerans str. Agy99]                                                                                                                        | 79.5  | 320 | 326 |
| fig 6666666.28482.peg.4761 | R018875 | (gi:253799070) fbpB (TBMG 02108) - secreted fibronectin-binding protein antigen 85-B fbpB [Mycobacterium tuberculosis str. KZN 1435]                                                                                   | 80.43 | 320 | 326 |
| fig 6666666.28482.peg.4761 | R005421 | (gi:15609023) fbpB (Rv1886c) - SECRETED ANTIGEN 85-B FBPB (85B) (ANTIGEN 85 COMPLEX B) (MYCOLYL TRANSFERASE 85B) (FIBRONECTIN-BINDING PROTEIN B) (EXTRACELLULAR ALPHA-ANTIGEN) [Mycobacterium tuberculosis str. H37Rv] | 80.43 | 320 | 326 |
| fig 6666666.28482.peg.4761 | R005422 | (gi:148661692) fbpB (MRA 1897) - secreted antigen 85-B FbpB [Mycobacterium tuberculosis str. H37Ra]                                                                                                                    | 80.43 | 320 | 326 |
| fig 6666666.28482.peg.4761 | R013425 | (gi:148823097) fbpB (TBF 11914) - secreted antigen 85-B fbpB (fibronectin-binding protein B) [Mycobacterium tuberculosis str. F11]                                                                                     | 80.43 | 320 | 326 |
| fig 6666666.28482.peg.4761 | R018874 | (gi:340626894) fbpB (MCAN 19011) - secreted antigen 85-B FBPB [Mycobacterium canettii str. CIPT 140010059]                                                                                                             | 80.43 | 320 | 326 |
| fig 6666666.28482.peg.4761 | R005424 | (gi:31793077) fbpB (Mb1918c) - secreted antigen 85-B fbpB (85B) (antigen 85 complex B) (Mycolyl transferase 85B) (Fibronectin-binding protein B) (Extracellular alpha-antigen) [Mycobacterium bovis str. AF2122/97]    | 80.43 | 320 | 326 |
| fig 6666666.28482.peg.4761 | R018873 | (gi:339631939) fbpB (MAF 19080) - secreted antigen 85-B FBPB (85B) (antigen 85 complex B) [Mycobacterium africanum str. GM041182]                                                                                      | 80.43 | 320 | 326 |
| fig 6666666.28482.peg.4761 | R005423 | (gi:15841356) fbpB (MT1934) - esterase, putative, antigen 85-B [Mycobacterium tuberculosis str. CDC1551]                                                                                                               | 80.43 | 320 | 326 |
| fig 6666666.28482.peg.4761 | R018876 | (gi:224990274) fbpB (JTY 1907) - secreted antigen 85-B [Mycobacterium bovis str. BCG str. Tokyo 172]                                                                                                                   | 80.12 | 320 | 326 |
| fig 6666666.28482.peg.4761 | R005425 | (gi:121637790) fbpB (BCG 1923c) - secreted antigen 85-B fbpB [Mycobacterium bovis str. BCG Pasteur 1173P2]                                                                                                             | 80.12 | 320 | 326 |
| fig 6666666.28482.peg.4761 | R005428 | (gi:15828096) fbpB (ML2028) - antigen 85A, mycolyltransferase [Mycobacterium leprae str. TN]                                                                                                                           | 76.76 | 325 | 326 |
| fig 6666666.28482.peg.4761 | R018877 | (gi:221230573) fbpB (MLBr 02028) - antigen 85A, mycolyltransferase [Mycobacterium leprae str. Br4923]                                                                                                                  | 76.76 | 325 | 326 |

|                            |         |                                                                                                                                                                                    |       |     |     |
|----------------------------|---------|------------------------------------------------------------------------------------------------------------------------------------------------------------------------------------|-------|-----|-----|
| fig 6666666.28482.peg.4761 | R018871 | (gi:333992762) fbpA (JDM601 4122) - hypothetical protein [Mycobacterium sp. str. JDM601]                                                                                           | 76.51 | 315 | 326 |
| fig 6666666.28482.peg.4761 | R005413 | (gi:15843426) fbpA (MT3911) - esterase, putative, antigen 85-A [Mycobacterium tuberculosis str. CDC1551]                                                                           | 75.79 | 316 | 326 |
| fig 6666666.28482.peg.4761 | R018868 | (gi:253800852) fbpA (TBMG 03851) - secreted fibronectin-binding protein antigen fbpA [Mycobacterium tuberculosis str. KZN 1435]                                                    | 75.79 | 316 | 326 |
| fig 6666666.28482.peg.4761 | R005411 | (gi:15610940) fbpA (Rv3804c) - SECRETED ANTIGEN 85-A FBPA (MYCOLYL TRANSFERASE 85A) (FIBRONECTIN-BINDING PROTEIN A) (ANTIGEN 85 COMPLEX A) [Mycobacterium tuberculosis str. H37Rv] | 75.79 | 316 | 326 |
| fig 6666666.28482.peg.4761 | R005412 | (gi:148663672) fbpA (MRA 3844) - secreted antigen 85-A FbpA [Mycobacterium tuberculosis str. H37Ra]                                                                                | 75.79 | 316 | 326 |
| fig 6666666.28482.peg.4761 | R013424 | (gi:148825011) fbpA (TBFG 13838) - secreted antigen 85-A fbpA (fibronectin-binding protein A) [Mycobacterium tuberculosis str. F11]                                                | 75.79 | 316 | 326 |
| fig 6666666.28482.peg.4761 | R018867 | (gi:340628773) fbpA (MCAN 38231) - secreted antigen 85-A FBPA [Mycobacterium canettii str. CIPT 140010059]                                                                         | 75.79 | 316 | 326 |
| fig 6666666.28482.peg.4761 | R018869 | (gi:224992216) fbpA (JTY 3868) - secreted antigen 85-A [Mycobacterium bovis str. BCG str. Tokyo 172]                                                                               | 75.79 | 316 | 326 |
| fig 6666666.28482.peg.4761 | R005415 | (gi:121639721) fbpA (BCG 3866c) - Secreted antigen 85-A fbpA [Mycobacterium bovis str. BCG Pasteur 1173P2]                                                                         | 75.79 | 316 | 326 |
| fig 6666666.28482.peg.4761 | R005414 | (gi:31794978) fbpA (Mb3834c) - SECRETED ANTIGEN 85-A FBPA (MYCOLYL TRANSFERASE 85A) (FIBRONECTIN-BINDING PROTEIN A) (ANTIGEN 85 COMPLEX A) [Mycobacterium bovis str. AF2122/97]    | 75.79 | 316 | 326 |
| fig 6666666.28482.peg.4761 | R018866 | (gi:339633799) fbpA (MAF 38190) - secreted antigen 85-A FBPA (mycolyl transferase 85A) [Mycobacterium africanum str. GM041182]                                                     | 75.47 | 316 | 326 |
| fig 6666666.28482.peg.4761 | R018864 | (gi:183985336) fbpA (MMAR 5368) - secreted antigen 85-A FbpA [Mycobacterium marinum str. M]                                                                                        | 75.47 | 316 | 326 |
| fig 6666666.28482.peg.4761 | R005419 | (gi:118620004) fbpA (MUL 4987) - secreted antigen 85-A FbpA [Mycobacterium ulcerans str. Agy99]                                                                                    | 74.84 | 316 | 326 |
| fig 6666666.28482.peg.4761 | R005417 | (gi:118467129) fbpA (MAV 0214) - antigen 85-A [Mycobacterium avium str. 104]                                                                                                       | 76.21 | 309 | 326 |
| fig 6666666.28482.peg.4761 | R005416 | (gi:41406314) fbpA (MAP0216) - FbpA [Mycobacterium avium str. K-10 (subsp. paratuberculosis)]                                                                                      | 75.88 | 309 | 326 |



|                            |         |                                                                                                      |       |     |     |
|----------------------------|---------|------------------------------------------------------------------------------------------------------|-------|-----|-----|
| fig 6666666.28482.peg.4761 | R005418 | (gi:15826932) fbpA (ML0097) - antigen 85A, mycolytransferase [Mycobacterium leprae str. TN]          | 73.42 | 314 | 326 |
| fig 6666666.28482.peg.4761 | R018870 | (gi:221229410) fbpA (MLBr 00097) - antigen 85A, mycolytransferase [Mycobacterium leprae str. Br4923] | 73.42 | 314 | 326 |
| fig 6666666.28482.peg.4761 | R005446 | (gi:120402899) fbpC (Mvan 1902) - putative esterase [Mycobacterium vanbaalenii str. PYR-1]           | 68.94 | 318 | 326 |
| fig 6666666.28482.peg.4761 | R005430 | (gi:118473709) fbpB (MSMEG 2078) - antigen 85-C [Mycobacterium smegmatis str. MC2 155]               | 69.14 | 317 | 326 |
| fig 6666666.28482.peg.4761 | R005444 | (gi:145225038) fbpC (Mflv 4459) - putative esterase [Mycobacterium gilvum str. PYR-GCK]              | 68.01 | 318 | 326 |
| fig 6666666.28482.peg.4761 | R005466 | (gi:108801978) fbpC (Mmcs 5015) - putative esterase [Mycobacterium sp. str. MCS]                     | 65.17 | 319 | 326 |
| fig 6666666.28482.peg.4761 | R005461 | (gi:119871130) fbpC (Mkms 5103) - putative esterase [Mycobacterium sp. str. KMS]                     | 65.17 | 319 | 326 |
| fig 6666666.28482.peg.4761 | R005456 | (gi:126437959) fbpC (Mjls 5396) - putative esterase [Mycobacterium sp. str. JLS]                     | 65.17 | 319 | 326 |
| fig 6666666.28482.peg.4761 | R005441 | (gi:145221756) fbpC (Mflv 1164) - putative esterase [Mycobacterium gilvum str. PYR-GCK]              | 65.95 | 316 | 326 |
| fig 6666666.28482.peg.4761 | R005420 | (gi:118468744) fbpA (MSMEG 6398) - antigen 85-A [Mycobacterium smegmatis str. MC2 155]               | 66.67 | 313 | 326 |
| fig 6666666.28482.peg.4761 | R005462 | (gi:108798566) fbpC (Mmcs 1596) - putative esterase [Mycobacterium sp. str. MCS]                     | 68.42 | 318 | 326 |
| fig 6666666.28482.peg.4761 | R005457 | (gi:119867665) fbpC (Mkms 1620) - putative esterase [Mycobacterium sp. str. KMS]                     | 68.42 | 318 | 326 |
| fig 6666666.28482.peg.4761 | R005452 | (gi:126434164) fbpC (Mjls 1566) - putative esterase [Mycobacterium sp. str. JLS]                     | 68.73 | 318 | 326 |
| fig 6666666.28482.peg.4761 | R005440 | (gi:118467737) fbpC (MSMEG 3580) - antigen 85-C [Mycobacterium smegmatis str. MC2 155]               | 65.75 | 316 | 326 |
| fig 6666666.28482.peg.4761 | R005464 | (gi:108799739) fbpC (Mmcs 2773) - putative esterase [Mycobacterium sp. str. MCS]                     | 65.12 | 315 | 326 |
| fig 6666666.28482.peg.4761 | R005459 | (gi:119868849) fbpC (Mkms 2817) - putative esterase [Mycobacterium sp. str. KMS]                     | 65.12 | 315 | 326 |

|                            |         |                                                                                                                                                                                                  |       |     |     |
|----------------------------|---------|--------------------------------------------------------------------------------------------------------------------------------------------------------------------------------------------------|-------|-----|-----|
| fig 6666666.28482.peg.4761 | R005455 | (gi:126437080) fbpC (Mjls 4511) - putative esterase [Mycobacterium sp. str. JLS]                                                                                                                 | 62.54 | 313 | 326 |
| fig 6666666.28482.peg.4761 | R005454 | (gi:126435380) fbpC (Mjls 2800) - putative esterase [Mycobacterium sp. str. JLS]                                                                                                                 | 65.12 | 315 | 326 |
| fig 6666666.28482.peg.4761 | R005433 | (gi:15839510) fbpC (MT0137) - esterase, putative, antigen 85-C [Mycobacterium tuberculosis str. CDC1551]                                                                                         | 65.5  | 309 | 326 |
| fig 6666666.28482.peg.4761 | R018882 | (gi:253797048) fbpC (TBMG 00130) - secreted fibronectin-binding protein C antigen 85-C fbpC [Mycobacterium tuberculosis str. KZN 1435]                                                           | 65.5  | 309 | 326 |
| fig 6666666.28482.peg.4761 | R005431 | (gi:57116693) fbpC (Rv0129c) - SECRETED ANTIGEN 85-C FBPC (85C) (ANTIGEN 85 COMPLEX C) (AG58C) (MYCOLYL TRANSFERASE 85C) (FIBRONECTIN-BINDING PROTEIN C) [Mycobacterium tuberculosis str. H37Rv] | 65.5  | 309 | 326 |
| fig 6666666.28482.peg.4761 | R005432 | (gi:148659893) fbpC (MRA 0136) - secreted antigen 86-C FbpC [Mycobacterium tuberculosis str. H37Ra]                                                                                              | 65.5  | 309 | 326 |
| fig 6666666.28482.peg.4761 | R013426 | (gi:148821321) fbpC (TBMG 10130) - secreted antigen 85-C fbpC (fibronectin-binding protein C) [Mycobacterium tuberculosis str. F11]                                                              | 65.5  | 309 | 326 |
| fig 6666666.28482.peg.4761 | R018881 | (gi:340625164) fbpC (MCAN 01321) - secreted antigen 85-C FBPC [Mycobacterium canettii str. CIPT 140010059]                                                                                       | 65.5  | 309 | 326 |
| fig 6666666.28482.peg.4761 | R018883 | (gi:224988515) fbpC (JTY 0133) - secreted antigen 85-C [Mycobacterium bovis str. BCG str. Tokyo 172]                                                                                             | 65.5  | 309 | 326 |
| fig 6666666.28482.peg.4761 | R005435 | (gi:121636042) fbpC (BCG 0163c) - Secreted antigen 85-c fbpC (85C) [Mycobacterium bovis str. BCG Pasteur 1173P2]                                                                                 | 65.5  | 309 | 326 |
| fig 6666666.28482.peg.4761 | R005434 | (gi:31791308) fbpC (Mb0134c) - SECRETED ANTIGEN 85-C FBPC (85C) (ANTIGEN 85 COMPLEX C) (AG58C) (MYCOLYL TRANSFERASE 85C) (FIBRONECTIN-BINDING PROTEIN C) [Mycobacterium bovis str. AF2122/97]    | 65.5  | 309 | 326 |
| fig 6666666.28482.peg.4761 | R018880 | (gi:339630211) fbpC (MAF 01290) - secreted antigen 85-C FbpC [Mycobacterium africanum str. GM041182]                                                                                             | 65.5  | 309 | 326 |
| fig 6666666.28482.peg.4761 | R005438 | (gi:15828432) fbpC (ML2655) - secreted antigen 85A, mycolyltransferase [Mycobacterium leprae str. TN]                                                                                            | 63.78 | 308 | 326 |
| fig 6666666.28482.peg.4761 | R018884 | (gi:221230909) fbpC (MLBr 02655) - secreted antigen 85A, mycolyltransferase [Mycobacterium leprae str. Br4923]                                                                                   | 63.78 | 308 | 326 |

|                            |         |                                                                                                                                                               |       |     |     |
|----------------------------|---------|---------------------------------------------------------------------------------------------------------------------------------------------------------------|-------|-----|-----|
| fig 6666666.28482.peg.4761 | R005436 | (gi:41409629) fbpC (MAP3531c) - FbpC2 [Mycobacterium avium str. K-10 (subsp. paratuberculosis)]                                                               | 63.58 | 309 | 326 |
| fig 6666666.28482.peg.4761 | R005437 | (gi:118465788) fbpC (MAV 5183) - antigen 85-C [Mycobacterium avium str. 104]                                                                                  | 63.58 | 309 | 326 |
| fig 6666666.28482.peg.4761 | R005448 | (gi:120404040) fbpC (Mvan 3061) - putative esterase [Mycobacterium vanbaalenii str. PYR-1]                                                                    | 65.03 | 298 | 326 |
| fig 6666666.28482.peg.4761 | R005443 | (gi:145223921) fbpC (Mflv 3335) - putative esterase [Mycobacterium gilvum str. PYR-63.32 GCK]                                                                 | 63.32 | 311 | 326 |
| fig 6666666.28482.peg.4761 | R018865 | (gi:169627281) fbpA (MAB 0176) - antigen 85-A precursor [Mycobacterium abscessus str. ATCC 19977]                                                             | 61.68 | 313 | 326 |
| fig 6666666.28482.peg.4761 | R005439 | (gi:118619846) fbpC (MUL 4793) - secreted antigen 85-C FbpC [Mycobacterium ulcerans str. Agy99]                                                               | 65.5  | 309 | 326 |
| fig 6666666.28482.peg.4761 | R018879 | (gi:183980359) fbpC (MMAR 0328) - secreted antigen 85-C FbpC [Mycobacterium marinum str. M]                                                                   | 65.5  | 309 | 326 |
| fig 6666666.28482.peg.4761 | R018885 | (gi:333992822) fbpC (JDM601 4182) - hypothetical protein [Mycobacterium sp. str. JDM601]                                                                      | 65.87 | 289 | 326 |
| fig 6666666.28482.peg.4761 | R005458 | (gi:119867920) fbpC (Mkms 1882) - putative esterase [Mycobacterium sp. str. KMS]                                                                              | 60.5  | 316 | 326 |
| fig 6666666.28482.peg.4761 | R005453 | (gi:126434404) fbpC (Mjls 1816) - putative esterase [Mycobacterium sp. str. JLS]                                                                              | 60.38 | 315 | 326 |
| fig 6666666.28482.peg.4798 | R006296 | (gi:41409369) devR/dosR (MAP3271c) - hypothetical protein [Mycobacterium avium str. K-10 (subsp. paratuberculosis)]                                           | 87.78 | 221 | 223 |
| fig 6666666.28482.peg.4798 | R006297 | (gi:118466851) devR/dosR (MAV 4109) - two component transcriptional regulatory protein devr [Mycobacterium avium str. 104]                                    | 87.78 | 221 | 223 |
| fig 6666666.28482.peg.4798 | R006299 | (gi:118472166) devR/dosR (MSMEG 5244) - two component transcriptional regulatory protein devr [Mycobacterium smegmatis str. MC2 155]                          | 85.31 | 211 | 223 |
| fig 6666666.28482.peg.4798 | R006300 | (gi:145224429) devR/dosR (Mflv 3847) - two component transcriptional regulator, LuxR family [Mycobacterium gilvum str. PYR-GCK]                               | 86.32 | 212 | 223 |
| fig 6666666.28482.peg.4798 | R019302 | (gi:253800166) devR/dosR (TBMG 03176) - two component system transcriptional regulator devR [Mycobacterium tuberculosis str. KZN 1435]                        | 84.58 | 214 | 223 |
| fig 6666666.28482.peg.4798 | R006291 | (gi:15610269) devR/dosR (Rv3133c) - TWO COMPONENT TRANSCRIPTIONAL REGULATORY PROTEIN DEVR (PROBABLY LUXR/UHPA-FAMILY) [Mycobacterium tuberculosis str. H37Rv] | 84.58 | 214 | 223 |

|                            |         |                                                                                                                                                                        |       |     |     |
|----------------------------|---------|------------------------------------------------------------------------------------------------------------------------------------------------------------------------|-------|-----|-----|
| fig 6666666.28482.peg.4798 | R006292 | (gi:148662987) devR/dosR (MRA 3165) - two component transcriptional regulatory protein DevR [Mycobacterium tuberculosis str. H37Ra]                                    | 84.58 | 214 | 223 |
| fig 6666666.28482.peg.4798 | R013509 | (gi:148824327) devR/dosR (TBFG 13154) - two component system transcriptional regulatory protein devR (luxR/uhpA-family) [Mycobacterium tuberculosis str. F11]          | 84.58 | 214 | 223 |
| fig 6666666.28482.peg.4798 | R006293 | (gi:15842706) devR/dosR (MT3219) - DNA-binding response regulator, LuxR family [Mycobacterium tuberculosis str. CDC1551]                                               | 84.58 | 214 | 223 |
| fig 6666666.28482.peg.4798 | R019301 | (gi:340628109) devR/dosR (MCAN 31471) - two component transcriptional regulatory protein [Mycobacterium canettii str. CIPT 140010059]                                  | 84.58 | 214 | 223 |
| fig 6666666.28482.peg.4798 | R019303 | (gi:224991508) devR/dosR (JTY 3151) - two component transcriptional regulatory protein [Mycobacterium bovis str. BCG str. Tokyo 172]                                   | 84.58 | 214 | 223 |
| fig 6666666.28482.peg.4798 | R006295 | (gi:121639016) devR/dosR (BCG 3156c) - Two component transcriptional regulatory protein devR (probably luxR/uhpA-family) [Mycobacterium bovis str. BCG Pasteur 1173P2] | 84.58 | 214 | 223 |
| fig 6666666.28482.peg.4798 | R006294 | (gi:31794309) devR/dosR (Mb3157c) - TWO COMPONENT TRANSCRIPTIONAL REGULATORY PROTEIN DEVR (PROBABLY LUXR/UHPA-FAMILY) [Mycobacterium bovis str. AF2122/97]             | 84.58 | 214 | 223 |
| fig 6666666.28482.peg.4798 | R019300 | (gi:339633140) devR/dosR (MAF 31410) - two component transcriptional regulatory protein DEVR (probably LUXR/UHPA-family) [Mycobacterium africanum str. GM041182]       | 84.58 | 214 | 223 |
| fig 6666666.28482.peg.4798 | R019304 | (gi:333991618) devR/dosR (JDM601 2978) - two-component transcriptional regulatory protein DevR [Mycobacterium sp. str. JDM601]                                         | 84.69 | 209 | 223 |
| fig 6666666.28482.peg.4798 | R006307 | (gi:108801090) devR/dosR (Mmcs 4126) - two component transcriptional regulator, LuxR family [Mycobacterium sp. str. MCS]                                               | 85.17 | 209 | 223 |
| fig 6666666.28482.peg.4798 | R006305 | (gi:119870231) devR/dosR (Mkms 4201) - two component transcriptional regulator, LuxR family [Mycobacterium sp. str. KMS]                                               | 84.04 | 213 | 223 |
| fig 6666666.28482.peg.4798 | R006303 | (gi:126436928) devR/dosR (Mjls 4357) - two component transcriptional regulator, LuxR family [Mycobacterium sp. str. JLS]                                               | 84.04 | 213 | 223 |
| fig 6666666.28482.peg.4798 | R006298 | (gi:118617914) devR/dosR (MUL 2423) - two component transcriptional regulatory protein DevR [Mycobacterium ulcerans str. Agy99]                                        | 82.79 | 215 | 223 |
| fig 6666666.28482.peg.4798 | R019298 | (gi:183981531) devR/dosR (MMAR 1516) - two-component transcriptional regulatory protein DevR [Mycobacterium marinum str. M]                                            | 82.79 | 215 | 223 |

|                            |         |                                                                                                                                                                    |       |     |     |
|----------------------------|---------|--------------------------------------------------------------------------------------------------------------------------------------------------------------------|-------|-----|-----|
| fig 6666666.28482.peg.4798 | R006302 | (gi:120402438) devR/dosR (Mvan 1427) - two component transcriptional regulator, LuxR family [Mycobacterium vanbaalenii str. PYR-1]                                 | 82.63 | 213 | 223 |
| fig 6666666.28482.peg.4798 | R006308 | (gi:108798049) devR/dosR (Mmcs 1076) - two component transcriptional regulator, LuxR family [Mycobacterium sp. str. MCS]                                           | 82.46 | 211 | 223 |
| fig 6666666.28482.peg.4798 | R006306 | (gi:119867144) devR/dosR (Mkms 1092) - two component transcriptional regulator, LuxR family [Mycobacterium sp. str. KMS]                                           | 82.46 | 211 | 223 |
| fig 6666666.28482.peg.4798 | R006304 | (gi:126433709) devR/dosR (Mjls 1103) - two component transcriptional regulator, LuxR family [Mycobacterium sp. str. JLS]                                           | 82.46 | 211 | 223 |
| fig 6666666.28482.peg.4798 | R006301 | (gi:120403536) devR/dosR (Mvan 2548) - two component transcriptional regulator, LuxR family [Mycobacterium vanbaalenii str. PYR-1]                                 | 87.85 | 214 | 223 |
| fig 6666666.28482.peg.4798 | R019299 | (gi:169630970) devR/dosR (MAB 3891c) - LuxR family transcriptional regulator [Mycobacterium abscessus str. ATCC 19977]                                             | 69.77 | 215 | 223 |
| fig 6666666.28482.peg.4799 | R006314 | (gi:41409368) devS (MAP3270c) - hypothetical protein [Mycobacterium avium str. K-10 (subsp. paratuberculosis)]                                                     | 77.7  | 546 | 572 |
| fig 6666666.28482.peg.4799 | R006315 | (gi:118467162) devS (MAV 4108) - GAF family protein [Mycobacterium avium str. 104]                                                                                 | 77.7  | 546 | 572 |
| fig 6666666.28482.peg.4868 | R005662 | (gi:118466775) sapM (MAV 4287) - secreted acid phosphatase [Mycobacterium avium str. 104]                                                                          | 81.02 | 270 | 283 |
| fig 6666666.28482.peg.4868 | R005661 | (gi:41409530) sapM (MAP3432) - hypothetical protein [Mycobacterium avium str. K-10 (subsp. paratuberculosis)]                                                      | 81.58 | 262 | 283 |
| fig 6666666.28482.peg.4868 | R018927 | (gi:224991692) sapM (JTY 3335) - putative acid phosphatase [Mycobacterium bovis str. BCG str. Tokyo 172]                                                           | 72.76 | 278 | 283 |
| fig 6666666.28482.peg.4868 | R005660 | (gi:121639233) sapM (BCG 3375) - putative acid phosphatase [Mycobacterium bovis str. BCG Pasteur 1173P2]                                                           | 72.76 | 278 | 283 |
| fig 6666666.28482.peg.4868 | R005659 | (gi:31794490) sapM (Mb3338) - POSSIBLE ACID PHOSPHATASE (ACID PHOSPHOMONOESTERASE) (PHOSPHOMONOESTERASE) (GLYCEROPHOSPHATASE) [Mycobacterium bovis str. AF2122/97] | 72.76 | 278 | 283 |
| fig 6666666.28482.peg.4868 | R018924 | (gi:339633317) sapM (MAF 33210) - putative acid phosphatase (acid phosphomonoesterase) [Mycobacterium africanum str. GM041182]                                     | 72.76 | 278 | 283 |
| fig 6666666.28482.peg.4868 | R018925 | (gi:340628292) sapM (MCAN 33331) - putative acid phosphatase [Mycobacterium canettii str. CIPT 140010059]                                                          | 72.4  | 278 | 283 |
| fig 6666666.28482.peg.4868 | R018926 | (gi:253800353) sapM (TBMG 03358) - acid phosphatase [Mycobacterium tuberculosis str. KZN 1435]                                                                     | 72.4  | 278 | 283 |

|                            |         |                                                                                                                                                                       |       |     |     |
|----------------------------|---------|-----------------------------------------------------------------------------------------------------------------------------------------------------------------------|-------|-----|-----|
| fig 6666666.28482.peg.4868 | R005656 | (gi:15610446) sapM (Rv3310) - POSSIBLE ACID PHOSPHATASE (ACID PHOSPHOMONOESTERASE) (PHOSPHOMONOESTERASE) (GLYCEROPHOSPHATASE) [Mycobacterium tuberculosis str. H37Rv] | 72.4  | 278 | 283 |
| fig 6666666.28482.peg.4868 | R005657 | (gi:148663173) sapM (MRA 3351) - putative acid phosphatase [Mycobacterium tuberculosis str. H37Ra]                                                                    | 72.4  | 278 | 283 |
| fig 6666666.28482.peg.4868 | R013443 | (gi:148824512) sapM (TBFG 13339) - hypothetical acid phosphatase [Mycobacterium tuberculosis str. F11]                                                                | 72.4  | 278 | 283 |
| fig 6666666.28482.peg.4868 | R005658 | (gi:15842901) sapM (MT3409) - acid phosphatase, putative [Mycobacterium tuberculosis str. CDC1551]                                                                    | 72.4  | 278 | 283 |
| fig 6666666.28482.peg.4868 | R018923 | (gi:183981238) sapM (MMAR 1216) - acid phosphatase [Mycobacterium marinum str. M]                                                                                     | 70.42 | 280 | 283 |
| fig 6666666.28482.peg.4868 | R005663 | (gi:118618136) sapM (MUL 2676) - acid phosphatase [Mycobacterium ulcerans str. Agy99]                                                                                 | 71.22 | 275 | 283 |
| fig 6666666.28482.peg.5149 | R019483 | (gi:183984678) mce7A (MMAR 4710) - MCE-family protein [Mycobacterium marinum str. M]                                                                                  | 81.88 | 425 | 425 |
| fig 6666666.28482.peg.5149 | R006740 | (gi:118472804) mce7A (MSMEG 4794) - virulence factor [Mycobacterium smegmatis str. MC2 155]                                                                           | 63.29 | 425 | 425 |
| fig 6666666.28482.peg.5149 | R006739 | (gi:118467131) mce7A (MAV 0948) - virulence factor Mce family protein, putative [Mycobacterium avium str. 104]                                                        | 67.94 | 393 | 425 |
| fig 6666666.28482.peg.5149 | R006738 | (gi:41406857) mce7A (MAP0759) - hypothetical protein [Mycobacterium avium str. K-10 (subsp. paratuberculosis)]                                                        | 66.58 | 407 | 425 |
| fig 6666666.28482.peg.5149 | R006744 | (gi:126436261) mce7A (Mjls 3684) - virulence factor Mce family protein [Mycobacterium sp. str. JLS]                                                                   | 61.46 | 392 | 425 |
| fig 6666666.28482.peg.5149 | R006746 | (gi:108800637) mce7A (Mmcs 3671) - Mammalian cell entry [Mycobacterium sp. str. MCS]                                                                                  | 61.46 | 392 | 425 |
| fig 6666666.28482.peg.5149 | R006745 | (gi:119869776) mce7A (Mkms 3744) - virulence factor Mce family protein [Mycobacterium sp. str. KMS]                                                                   | 61.46 | 392 | 425 |
| fig 6666666.28482.peg.5149 | R006791 | (gi:41408287) mce8A (MAP2189) - hypothetical protein [Mycobacterium avium str. K-10 (subsp. paratuberculosis)]                                                        | 62.15 | 391 | 425 |
| fig 6666666.28482.peg.5149 | R006793 | (gi:145225116) mce8A (Mflv 4538) - virulence factor Mce family protein [Mycobacterium gilvum str. PYR-GCK]                                                            | 61.28 | 390 | 425 |
| fig 6666666.28482.peg.5149 | R006794 | (gi:120403835) mce8A (Mvan 2851) - virulence factor Mce family protein [Mycobacterium vanbaalenii str. PYR-1]                                                         | 60.97 | 392 | 425 |

|                            |         |                                                                                                                |       |     |     |
|----------------------------|---------|----------------------------------------------------------------------------------------------------------------|-------|-----|-----|
| fig 6666666.28482.peg.5149 | R006797 | (gi:108797255) mce8A (Mmcs 0275) - Mammalian cell entry [Mycobacterium sp. str. MCS]                           | 60.26 | 390 | 425 |
| fig 6666666.28482.peg.5149 | R006796 | (gi:119866340) mce8A (Mkms 0285) - virulence factor Mce family protein [Mycobacterium sp. str. KMS]            | 60.26 | 390 | 425 |
| fig 6666666.28482.peg.5150 | R019484 | (gi:183984677) mce7B (MMAR 4709) - MCE-family protein [Mycobacterium marinum str. M]                           | 85.34 | 341 | 346 |
| fig 6666666.28482.peg.5150 | R006747 | (gi:41406858) mce7B (MAP0760) - hypothetical protein [Mycobacterium avium str. K-10 (subsp. paratuberculosis)] | 70.41 | 338 | 346 |
| fig 6666666.28482.peg.5150 | R006748 | (gi:118465177) mce7B (MAV 0949) - virulence factor Mce family protein [Mycobacterium avium str. 104]           | 70.41 | 338 | 346 |
| fig 6666666.28482.peg.5150 | R006749 | (gi:118473503) mce7B (MSMEG 4793) - virulence factor Mce family protein [Mycobacterium smegmatis str. MC2 155] | 65.4  | 341 | 346 |
| fig 6666666.28482.peg.5150 | R006752 | (gi:120405103) mce7B (Mvan 4149) - virulence factor Mce family protein [Mycobacterium vanbaalenii str. PYR-1]  | 65.59 | 340 | 346 |
| fig 6666666.28482.peg.5150 | R006750 | (gi:145223096) mce7B (Mflv 2509) - virulence factor Mce family protein [Mycobacterium gilvum str. PYR-GCK]     | 64.12 | 340 | 346 |
| fig 6666666.28482.peg.5150 | R006753 | (gi:126436260) mce7B (Mjls 3683) - virulence factor Mce family protein [Mycobacterium sp. str. JLS]            | 63.24 | 340 | 346 |
| fig 6666666.28482.peg.5150 | R006755 | (gi:108800636) mce7B (Mmcs 3670) - Mammalian cell entry [Mycobacterium sp. str. MCS]                           | 63.24 | 340 | 346 |
| fig 6666666.28482.peg.5150 | R006754 | (gi:119869775) mce7B (Mkms 3743) - virulence factor Mce family protein [Mycobacterium sp. str. KMS]            | 63.24 | 340 | 346 |
| fig 6666666.28482.peg.5150 | R006804 | (gi:108797256) mce8B (Mmcs 0276) - Mammalian cell entry [Mycobacterium sp. str. MCS]                           | 63.77 | 334 | 346 |
| fig 6666666.28482.peg.5150 | R006803 | (gi:119866341) mce8B (Mkms 0286) - virulence factor Mce family protein [Mycobacterium sp. str. KMS]            | 63.77 | 334 | 346 |
| fig 6666666.28482.peg.5150 | R006802 | (gi:126432880) mce8B (Mjls 0267) - virulence factor Mce family protein [Mycobacterium sp. str. JLS]            | 63.77 | 334 | 346 |
| fig 6666666.28482.peg.5150 | R006799 | (gi:118468491) mce8B (MSMEG 2856) - virulence factor Mce family protein [Mycobacterium smegmatis str. MC2 155] | 62.97 | 341 | 346 |
| fig 6666666.28482.peg.5150 | R006798 | (gi:41408288) mce8B (MAP2190) - hypothetical protein [Mycobacterium avium str. K-10 (subsp. paratuberculosis)] | 63.93 | 341 | 346 |

|                            |         |                                                                                                                |       |     |     |
|----------------------------|---------|----------------------------------------------------------------------------------------------------------------|-------|-----|-----|
| fig 6666666.28482.peg.5150 | R006800 | (gi:145225115) mce8B (Mflv 4537) - virulence factor Mce family protein [Mycobacterium gilvum str. PYR-GCK]     | 63.17 | 332 | 346 |
| fig 6666666.28482.peg.5150 | R006801 | (gi:120403836) mce8B (Mvan 2852) - virulence factor Mce family protein [Mycobacterium vanbaalenii str. PYR-1]  | 62.72 | 336 | 346 |
| fig 6666666.28482.peg.5151 | R019485 | (gi:183984676) mce7C (MMAR 4708) - MCE-family protein [Mycobacterium marinum str. M]                           | 83.24 | 358 | 360 |
| fig 6666666.28482.peg.5151 | R006756 | (gi:41406859) mce7C (MAP0761) - hypothetical protein [Mycobacterium avium str. K-10 (subsp. paratuberculosis)] | 64.35 | 356 | 360 |
| fig 6666666.28482.peg.5151 | R006757 | (gi:118465942) mce7C (MAV 0950) - virulence factor Mce family protein [Mycobacterium avium str. 104]           | 64.35 | 356 | 360 |
| fig 6666666.28482.peg.5151 | R006761 | (gi:120405102) mce7C (Mvan 4148) - virulence factor Mce family protein [Mycobacterium vanbaalenii str. PYR-1]  | 64.89 | 356 | 360 |
| fig 6666666.28482.peg.5151 | R006762 | (gi:126436259) mce7C (Mjls 3682) - virulence factor Mce family protein [Mycobacterium sp. str. JLS]            | 61.52 | 356 | 360 |
| fig 6666666.28482.peg.5151 | R006764 | (gi:108800635) mce7C (Mmcs 3669) - Mammalian cell entry [Mycobacterium sp. str. MCS]                           | 61.24 | 356 | 360 |
| fig 6666666.28482.peg.5151 | R006763 | (gi:119869774) mce7C (Mkms 3742) - virulence factor Mce family protein [Mycobacterium sp. str. KMS]            | 61.24 | 356 | 360 |
| fig 6666666.28482.peg.5151 | R006759 | (gi:145223097) mce7C (Mflv 2510) - virulence factor Mce family protein [Mycobacterium gilvum str. PYR-GCK]     | 62.92 | 356 | 360 |
| fig 6666666.28482.peg.5151 | R006805 | (gi:41408289) mce8C (MAP2191) - hypothetical protein [Mycobacterium avium str. K-10 (subsp. paratuberculosis)] | 61.28 | 358 | 360 |
| fig 6666666.28482.peg.5151 | R006807 | (gi:145225114) mce8C (Mflv 4536) - virulence factor Mce family protein [Mycobacterium gilvum str. PYR-GCK]     | 60.61 | 358 | 360 |
| fig 6666666.28482.peg.5151 | R006811 | (gi:108797257) mce8C (Mmcs 0277) - Mammalian cell entry [Mycobacterium sp. str. MCS]                           | 60.61 | 358 | 360 |
| fig 6666666.28482.peg.5151 | R006810 | (gi:119866342) mce8C (Mkms 0287) - virulence factor Mce family protein [Mycobacterium sp. str. KMS]            | 60.61 | 358 | 360 |
| fig 6666666.28482.peg.5151 | R006809 | (gi:126432881) mce8C (Mjls 0268) - virulence factor Mce family protein [Mycobacterium sp. str. JLS]            | 60.61 | 358 | 360 |
| fig 6666666.28482.peg.5260 | R018735 | (gi:183981778) fadD28 (MMAR 1765) - acyl-CoA synthetase [Mycobacterium marinum str. M]                         | 60.48 | 581 | 582 |



|                            |         |                                                                                                                                      |       |     |     |
|----------------------------|---------|--------------------------------------------------------------------------------------------------------------------------------------|-------|-----|-----|
| fig 6666666.28482.peg.5260 | R005202 | (gi:118617586) fadD28 (MUL 2008) - fatty-acyl AMP ligase FadD28 [Mycobacterium ulcerans str. Agy99]                                  | 60.14 | 581 | 582 |
| fig 6666666.28482.peg.5260 | R005200 | (gi:118462725) fadD28 (MAV 1328) - acyl-CoA synthase [Mycobacterium avium str. 104]                                                  | 62.03 | 582 | 582 |
| fig 6666666.28482.peg.5260 | R018739 | (gi:224991315) fadD28 (JTY 2958) - acyl-CoA synthetase [Mycobacterium bovis str. BCG str. Tokyo 172]                                 | 60.48 | 581 | 582 |
| fig 6666666.28482.peg.5260 | R005198 | (gi:121638823) fadD28 (BCG 2963) - fatty-acid-CoA ligase fadD28 [Mycobacterium bovis str. BCG Pasteur 1173P2]                        | 60.48 | 581 | 582 |
| fig 6666666.28482.peg.5260 | R005197 | (gi:31794118) fadD28 (Mb2966) - acyl-CoA synthase [Mycobacterium bovis str. AF2122/97]                                               | 60.48 | 581 | 582 |
| fig 6666666.28482.peg.5260 | R018737 | (gi:340627932) fadD28 (MCAN 29631) - fatty-acid-CoA ligase FADD28 [Mycobacterium canettii str. CIPT 140010059]                       | 60.31 | 581 | 582 |
| fig 6666666.28482.peg.5260 | R018738 | (gi:253797971) fadD28 (TBMG 01031) - acyl-CoA synthetase [Mycobacterium tuberculosis str. KZN 1435]                                  | 60.31 | 581 | 582 |
| fig 6666666.28482.peg.5260 | R005194 | (gi:15610078) fadD28 (Rv2941) - acyl-CoA synthase [Mycobacterium tuberculosis str. H37Rv]                                            | 60.31 | 581 | 582 |
| fig 6666666.28482.peg.5260 | R005195 | (gi:148662787) fadD28 (MRA 2967) - fatty-acid-CoA ligase FadD28 [Mycobacterium tuberculosis str. H37Ra]                              | 60.31 | 581 | 582 |
| fig 6666666.28482.peg.5260 | R013401 | (gi:148824130) fadD28 (TBFM 12955) - fatty-acid-CoA ligase fadD28 [Mycobacterium tuberculosis str. F11]                              | 60.31 | 581 | 582 |
| fig 6666666.28482.peg.5260 | R005196 | (gi:15842487) fadD28 (MT3011) - acyl-CoA synthase [Mycobacterium tuberculosis str. CDC1551]                                          | 60.31 | 581 | 582 |
| fig 6666666.28482.peg.5260 | R018736 | (gi:339632948) fadD28 (MAF 29460) - fatty-acid-CoA ligase FADD28 (fatty-acid-CoA synthetase) [Mycobacterium africanum str. GM041182] | 60.31 | 581 | 582 |
| fig 6666666.28482.peg.5263 | R005384 | (gi:118463607) papA2 (MAV 1762) - condensation domain protein [Mycobacterium avium str. 104]                                         | 83.51 | 473 | 480 |
| fig 6666666.28482.peg.5295 | R006136 | (gi:41409504) sigF (MAP3406c) - sigma factor SigF [Mycobacterium avium str. K-10 (subsp. paratuberculosis)]                          | 91.98 | 262 | 262 |
| fig 6666666.28482.peg.5295 | R006138 | (gi:118618107) sigF (MUL 2640) - alternate RNA polymerase sigma factor SigF [Mycobacterium ulcerans str. Agy99]                      | 89.31 | 262 | 262 |
| fig 6666666.28482.peg.5295 | R019215 | (gi:183981270) sigF (MMAR 1248) - RNA polymerase sigma factor SigF [Mycobacterium marinum str. M]                                    | 89.31 | 262 | 262 |

|                            |         |                                                                                                                            |       |     |     |
|----------------------------|---------|----------------------------------------------------------------------------------------------------------------------------|-------|-----|-----|
| fig 6666666.28482.peg.5295 | R019219 | (gi:253800329) sigF (TBMG 03334) - RNA polymerase sigma factor SigF [Mycobacterium tuberculosis str. KZN 1435]             | 88.55 | 262 | 262 |
| fig 6666666.28482.peg.5295 | R006131 | (gi:15610422) sigF (Rv3286c) - sigma factor SigF [Mycobacterium tuberculosis str. H37Rv]                                   | 88.55 | 262 | 262 |
| fig 6666666.28482.peg.5295 | R006132 | (gi:148663149) sigF (MRA 3327) - sigma factor SigF [Mycobacterium tuberculosis str. H37Ra]                                 | 88.55 | 262 | 262 |
| fig 6666666.28482.peg.5295 | R013498 | (gi:148824488) sigF (TBFG 13315) - alternate RNA polymerase sigma factor sigF [Mycobacterium tuberculosis str. F11]        | 88.55 | 262 | 262 |
| fig 6666666.28482.peg.5295 | R006133 | (gi:15842877) sigF (MT3385) - sigma factor SigF [Mycobacterium tuberculosis str. CDC1551]                                  | 88.55 | 262 | 262 |
| fig 6666666.28482.peg.5295 | R019218 | (gi:340628268) sigF (MCAN 33091) - alternate RNA polymerase sigma factor SIGF [Mycobacterium canettii str. CIPT 140010059] | 88.55 | 262 | 262 |
| fig 6666666.28482.peg.5295 | R019220 | (gi:224991668) sigF (JTY 3311) - RNA polymerase sigma factor SigF [Mycobacterium bovis str. BCG str. Tokyo 172]            | 88.55 | 262 | 262 |
| fig 6666666.28482.peg.5295 | R006135 | (gi:121639175) sigF (BCG 3315c) - putative rna polymerase sigma factor sigF [Mycobacterium bovis str. BCG Pasteur 1173P2]  | 88.55 | 262 | 262 |
| fig 6666666.28482.peg.5295 | R006134 | (gi:31794466) sigF (Mb3314c) - sigma factor SigF [Mycobacterium bovis str. AF2122/97]                                      | 88.55 | 262 | 262 |
| fig 6666666.28482.peg.5295 | R019217 | (gi:339633295) sigF (MAF 32970) - alternate RNA polymerase sigma factor SIGF [Mycobacterium africanum str. GM041182]       | 88.55 | 262 | 262 |
| fig 6666666.28482.peg.5295 | R006144 | (gi:108798252) sigF (Mmcs 1281) - RNA polymerase, sigma 28 subunit [Mycobacterium sp. str. MCS]                            | 84.41 | 262 | 262 |
| fig 6666666.28482.peg.5295 | R006143 | (gi:119867348) sigF (Mkms 1298) - RNA polymerase, sigma 28 subunit, FliA/WhiG family [Mycobacterium sp. str. KMS]          | 84.41 | 262 | 262 |
| fig 6666666.28482.peg.5295 | R006142 | (gi:126433912) sigF (Mjls 1310) - RNA polymerase, sigma 28 subunit, FliA/WhiG family [Mycobacterium sp. str. JLS]          | 84.41 | 262 | 262 |
| fig 6666666.28482.peg.5295 | R006137 | (gi:118464372) sigF (MAV 4256) - RNA polymerase sigma-F factor [Mycobacterium avium str. 104]                              | 90.87 | 241 | 262 |
| fig 6666666.28482.peg.5295 | R019221 | (gi:333991745) sigF (JDM601 3105) - RNA polymerase sigma factor SigF [Mycobacterium sp. str. JDM601]                       | 83.21 | 262 | 262 |
| fig 6666666.28482.peg.5295 | R006140 | (gi:145225367) sigF (Mflv 4789) - RNA polymerase, sigma 28 subunit, FliA/WhiG family [Mycobacterium gilvum str. PYR-GCK]   | 87.1  | 248 | 262 |

|                            |         |                                                                                                                             |       |     |     |
|----------------------------|---------|-----------------------------------------------------------------------------------------------------------------------------|-------|-----|-----|
| fig 6666666.28482.peg.5295 | R006141 | (gi:120402666) sigF (Mvan 1660) - RNA polymerase, sigma 28 subunit, FliA/WhiG family [Mycobacterium vanbaalenii str. PYR-1] | 85.48 | 248 | 262 |
| fig 6666666.28482.peg.5295 | R006139 | (gi:118470482) sigF (MSMEG 1804) - RNA polymerase sigma-F factor [Mycobacterium smegmatis str. MC2 155]                     | 83.94 | 249 | 262 |
| fig 6666666.28482.peg.5402 | R006348 | (gi:118465982) mce1A (MAV 5015) - virulence factor Mce family protein [Mycobacterium avium str. 104]                        | 69.2  | 431 | 441 |
| fig 6666666.28482.peg.5402 | R019323 | (gi:253797091) mce1A (TBMG 00170) - MCE-family protein mce1A [Mycobacterium tuberculosis str. KZN 1435]                     | 67.17 | 441 | 441 |
| fig 6666666.28482.peg.5402 | R006341 | (gi:57116701) mce1A (Rv0169) - MCE-FAMILY PROTEIN MCE1A [Mycobacterium tuberculosis str. H37Rv]                             | 67.17 | 441 | 441 |
| fig 6666666.28482.peg.5402 | R006342 | (gi:148659933) mce1A (MRA 0177) - MCE-family protein Mce1A [Mycobacterium tuberculosis str. H37Ra]                          | 67.17 | 441 | 441 |
| fig 6666666.28482.peg.5402 | R013512 | (gi:148821361) mce1A (TBFG 10170) - MCE-family protein mce1A [Mycobacterium tuberculosis str. F11]                          | 67.17 | 441 | 441 |
| fig 6666666.28482.peg.5402 | R006343 | (gi:15839547) mce1A (MT0178) - virulence factor [Mycobacterium tuberculosis str. CDC1551]                                   | 67.17 | 441 | 441 |
| fig 6666666.28482.peg.5402 | R019322 | (gi:340625206) mce1A (MCAN 01751) - MCE-family protein MCE1A [Mycobacterium canettii str. CIPT 140010059]                   | 67.17 | 441 | 441 |
| fig 6666666.28482.peg.5402 | R019324 | (gi:224988554) mce1A (JTY 0175) - MCE-family protein [Mycobacterium bovis str. BCG str. Tokyo 172]                          | 67.17 | 441 | 441 |
| fig 6666666.28482.peg.5402 | R006345 | (gi:121636081) mce1A (BCG 0206) - MCE-family protein mce1A [Mycobacterium bovis str. BCG Pasteur 1173P2]                    | 67.17 | 441 | 441 |
| fig 6666666.28482.peg.5402 | R006344 | (gi:31791347) mce1A (Mb0175) - MCE-FAMILY PROTEIN MCE1A [Mycobacterium bovis str. AF2122/97]                                | 67.17 | 441 | 441 |
| fig 6666666.28482.peg.5402 | R019321 | (gi:339630250) mce1A (MAF 01700) - MCE-family protein MCE1A [Mycobacterium africanum str. GM041182]                         | 67.17 | 441 | 441 |
| fig 6666666.28482.peg.5402 | R006346 | (gi:41409702) mce1A (MAP3604) - Mce1 2 [Mycobacterium avium str. K-10 (subsp. paratuberculosis)]                            | 68.45 | 431 | 441 |
| fig 6666666.28482.peg.5402 | R006350 | (gi:118464886) mce1A (MAV 4126) - virulence factor Mce family protein [Mycobacterium avium str. 104]                        | 69.46 | 425 | 441 |
| fig 6666666.28482.peg.5402 | R006349 | (gi:118464153) mce1A (MAV 4125) - virulence factor Mce family protein [Mycobacterium avium str. 104]                        | 66.44 | 441 | 441 |

|                            |         |                                                                                                               |       |     |     |
|----------------------------|---------|---------------------------------------------------------------------------------------------------------------|-------|-----|-----|
| fig 6666666.28482.peg.5402 | R006351 | (gi:15828393) mce1A (ML2589) - putative cell invasion protein [Mycobacterium leprae str. TN]                  | 65.9  | 430 | 441 |
| fig 6666666.28482.peg.5402 | R019325 | (gi:221230870) mce1A (MLBr 02589) - putative cell invasion protein [Mycobacterium leprae str. Br4923]         | 65.9  | 430 | 441 |
| fig 6666666.28482.peg.5402 | R019320 | (gi:183980443) mce1A (MMAR 0412) - MCE-family protein Mce1A [Mycobacterium marinum str. M]                    | 66.67 | 423 | 441 |
| fig 6666666.28482.peg.5402 | R006347 | (gi:41409387) mce1A (MAP3289c) - Mce1 1 [Mycobacterium avium str. K-10 (subsp. paratuberculosis)]             | 68    | 425 | 441 |
| fig 6666666.28482.peg.5402 | R006352 | (gi:118616795) mce1A (MUL 1062) - MCE-family protein Mce1A [Mycobacterium ulcerans str. Agy99]                | 66.43 | 423 | 441 |
| fig 6666666.28482.peg.5402 | R006413 | (gi:120401162) mce2A (Mvan 0134) - virulence factor Mce family protein [Mycobacterium vanbaalenii str. PYR-1] | 60.23 | 435 | 441 |
| fig 6666666.28482.peg.5402 | R006410 | (gi:118465139) mce2A (MAV 4551) - virulence factor Mce family protein [Mycobacterium avium str. 104]          | 65.67 | 402 | 441 |
| fig 6666666.28482.peg.5402 | R006414 | (gi:126432721) mce2A (Mjls 0108) - virulence factor Mce family protein [Mycobacterium sp. str. JLS]           | 60.51 | 428 | 441 |
| fig 6666666.28482.peg.5402 | R006409 | (gi:41410182) mce2A (MAP4084) - Mce2 [Mycobacterium avium str. K-10 (subsp. paratuberculosis)]                | 63.66 | 406 | 441 |
| fig 6666666.28482.peg.5402 | R019365 | (gi:253797523) mce2A (TBMG 00596) - MCE-family protein mce2A [Mycobacterium tuberculosis str. KZN 1435]       | 63.18 | 402 | 441 |
| fig 6666666.28482.peg.5402 | R013518 | (gi:148821791) mce2A (TBFG 10600) - MCE-family protein mce2A [Mycobacterium tuberculosis str. F11]            | 63.18 | 402 | 441 |
| fig 6666666.28482.peg.5402 | R006406 | (gi:15839991) mce2A (MT0618) - virulence factor [Mycobacterium tuberculosis str. CDC1551]                     | 63.18 | 402 | 441 |
| fig 6666666.28482.peg.5402 | R006404 | (gi:57116756) mce2A (Rv0589) - MCE-FAMILY PROTEIN MCE2A [Mycobacterium tuberculosis str. H37Rv]               | 63.18 | 402 | 441 |
| fig 6666666.28482.peg.5402 | R006405 | (gi:148660358) mce2A (MRA 0596) - MCE-family protein Mce2A [Mycobacterium tuberculosis str. H37Ra]            | 63.18 | 402 | 441 |
| fig 6666666.28482.peg.5402 | R019364 | (gi:340625619) mce2A (MCAN 05951) - MCE-family protein MCE2A [Mycobacterium canettii str. CIPT 140010059]     | 62.94 | 402 | 441 |
| fig 6666666.28482.peg.5402 | R019366 | (gi:224988979) mce2A (JTY 0604) - MCE-family protein [Mycobacterium bovis str. BCG str. Tokyo 172]            | 62.94 | 402 | 441 |

|                            |         |                                                                                                                |       |     |     |
|----------------------------|---------|----------------------------------------------------------------------------------------------------------------|-------|-----|-----|
| fig 6666666.28482.peg.5402 | R006408 | (gi:121636507) mce2A (BCG 0634) - mce-family protein mce2A [Mycobacterium bovis str. BCG Pasteur 1173P2]       | 62.94 | 402 | 441 |
| fig 6666666.28482.peg.5402 | R006407 | (gi:31791771) mce2A (Mb0604) - MCE-FAMILY PROTEIN MCE2A [Mycobacterium bovis str. AF2122/97]                   | 62.94 | 402 | 441 |
| fig 6666666.28482.peg.5402 | R019363 | (gi:339630657) mce2A (MAF 05960) - MCE-family protein MCE2A [Mycobacterium africanum str. GM041182]            | 62.94 | 402 | 441 |
| fig 6666666.28482.peg.5403 | R006359 | (gi:41409703) mce1B (MAP3605) - hypothetical protein [Mycobacterium avium str. K-10 (subsp. paratuberculosis)] | 75.72 | 346 | 346 |
| fig 6666666.28482.peg.5403 | R006360 | (gi:118463171) mce1B (MAV 5014) - virulence factor Mce family protein [Mycobacterium avium str. 104]           | 75.72 | 346 | 346 |
| fig 6666666.28482.peg.5403 | R019327 | (gi:183980444) mce1B (MMAR 0413) - MCE-family protein Mce1B [Mycobacterium marinum str. M]                     | 73.99 | 346 | 346 |
| fig 6666666.28482.peg.5403 | R006362 | (gi:118616796) mce1B (MUL 1063) - MCE-family protein Mce1B [Mycobacterium ulcerans str. Agy99]                 | 73.7  | 346 | 346 |
| fig 6666666.28482.peg.5403 | R019329 | (gi:340625207) mce1B (MCAN 01761) - MCE-family protein MCE1B [Mycobacterium canettii str. CIPT 140010059]      | 73.7  | 346 | 346 |
| fig 6666666.28482.peg.5403 | R019330 | (gi:253797092) mce1B (TBMG 00171) - MCE-family protein mce1B [Mycobacterium tuberculosis str. KZN 1435]        | 73.41 | 346 | 346 |
| fig 6666666.28482.peg.5403 | R006354 | (gi:15607311) mce1B (Rv0170) - MCE-FAMILY PROTEIN MCE1B [Mycobacterium tuberculosis str. H37Rv]                | 73.41 | 346 | 346 |
| fig 6666666.28482.peg.5403 | R006355 | (gi:148659934) mce1B (MRA 0178) - MCE-family protein Mce1B [Mycobacterium tuberculosis str. H37Ra]             | 73.41 | 346 | 346 |
| fig 6666666.28482.peg.5403 | R013513 | (gi:148821362) mce1B (TBFG 10171) - MCE-family protein mce1B [Mycobacterium tuberculosis str. F11]             | 73.41 | 346 | 346 |
| fig 6666666.28482.peg.5403 | R006356 | (gi:15839548) mce1B (MT0179) - virulence factor mce family protein [Mycobacterium tuberculosis str. CDC1551]   | 73.41 | 346 | 346 |
| fig 6666666.28482.peg.5403 | R019331 | (gi:224988555) mce1B (JTY 0176) - MCE-family protein [Mycobacterium bovis str. BCG str. Tokyo 172]             | 73.12 | 346 | 346 |
| fig 6666666.28482.peg.5403 | R006358 | (gi:121636082) mce1B (BCG 0207) - MCE-family protein mce1B [Mycobacterium bovis str. BCG Pasteur 1173P2]       | 73.12 | 346 | 346 |
| fig 6666666.28482.peg.5403 | R006357 | (gi:31791348) mce1B (Mb0176) - MCE-FAMILY PROTEIN MCE1B [Mycobacterium bovis str. AF2122/97]                   | 73.12 | 346 | 346 |

|                            |         |                                                                                                                |       |     |     |
|----------------------------|---------|----------------------------------------------------------------------------------------------------------------|-------|-----|-----|
| fig 6666666.28482.peg.5403 | R019328 | (gi:339630251) mce1B (MAF 01710) - MCE-family protein MCE1B [Mycobacterium africanum str. GM041182]            | 73.12 | 346 | 346 |
| fig 6666666.28482.peg.5403 | R006361 | (gi:15828394) mce1B (ML2590) - putative secreted protein [Mycobacterium leprae str. TN]                        | 73.41 | 346 | 346 |
| fig 6666666.28482.peg.5403 | R019332 | (gi:221230871) mce1B (MLBr 02590) - putative secreted protein [Mycobacterium leprae str. Br4923]               | 73.41 | 346 | 346 |
| fig 6666666.28482.peg.5403 | R006428 | (gi:108797099) mce2B (Mmcs 0119) - Mammalian cell entry [Mycobacterium sp. str. MCS]                           | 66.76 | 346 | 346 |
| fig 6666666.28482.peg.5403 | R006427 | (gi:119866184) mce2B (Mkms 0128) - virulence factor Mce family protein [Mycobacterium sp. str. KMS]            | 66.76 | 346 | 346 |
| fig 6666666.28482.peg.5403 | R006426 | (gi:126432722) mce2B (Mjls 0109) - virulence factor Mce family protein [Mycobacterium sp. str. JLS]            | 66.76 | 346 | 346 |
| fig 6666666.28482.peg.5403 | R006363 | (gi:118468987) mce1B (MSMEG 0135) - virulence factor Mce family protein [Mycobacterium smegmatis str. MC2 155] | 65.32 | 346 | 346 |
| fig 6666666.28482.peg.5403 | R006424 | (gi:145221305) mce2B (Mflv 0710) - virulence factor Mce family protein [Mycobacterium gilvum str. PYR-GCK]     | 67.34 | 346 | 346 |
| fig 6666666.28482.peg.5403 | R019333 | (gi:333988763) mce1B (JDM601 0123) - MCE-family protein Mce1B [Mycobacterium sp. str. JDM601]                  | 67.92 | 346 | 346 |
| fig 6666666.28482.peg.5403 | R006425 | (gi:120401163) mce2B (Mvan 0135) - virulence factor Mce family protein [Mycobacterium vanbaalenii str. PYR-1]  | 66.18 | 346 | 346 |
| fig 6666666.28482.peg.5403 | R019368 | (gi:340625620) mce2B (MCAN 05961) - mce-family protein mce2b [Mycobacterium canettii str. CIPT 140010059]      | 62.14 | 346 | 346 |
| fig 6666666.28482.peg.5403 | R019370 | (gi:224988980) mce2B (JTY 0605) - MCE-family protein [Mycobacterium bovis str. BCG str. Tokyo 172]             | 62.14 | 346 | 346 |
| fig 6666666.28482.peg.5403 | R006421 | (gi:121636508) mce2B (BCG 0635) - mce-family protein mce2B [Mycobacterium bovis str. BCG Pasteur 1173P2]       | 62.14 | 346 | 346 |
| fig 6666666.28482.peg.5403 | R006420 | (gi:31791772) mce2B (Mb0605) - MCE-FAMILY PROTEIN MCE2B [Mycobacterium bovis str. AF2122/97]                   | 62.14 | 346 | 346 |
| fig 6666666.28482.peg.5403 | R019367 | (gi:339630658) mce2B (MAF 05970) - MCE-family protein MCE2B [Mycobacterium africanum str. GM041182]            | 62.14 | 346 | 346 |
| fig 6666666.28482.peg.5403 | R006422 | (gi:41410183) mce2B (MAP4085) - hypothetical protein [Mycobacterium avium str. K-10 (subsp. paratuberculosis)] | 60.98 | 346 | 346 |

|                            |         |                                                                                                                |       |     |     |
|----------------------------|---------|----------------------------------------------------------------------------------------------------------------|-------|-----|-----|
| fig 6666666.28482.peg.5403 | R006423 | (gi:118465867) mce2B (MAV 4550) - virulence factor Mce family protein [Mycobacterium avium str. 104]           | 60.69 | 346 | 346 |
| fig 6666666.28482.peg.5403 | R019369 | (gi:253797524) mce2B (TBMG 00597) - MCE-family protein mce2B [Mycobacterium tuberculosis str. KZN 1435]        | 65.37 | 257 | 346 |
| fig 6666666.28482.peg.5403 | R006417 | (gi:15607730) mce2B (Rv0590) - MCE-FAMILY PROTEIN MCE2B [Mycobacterium tuberculosis str. H37Rv]                | 65.37 | 257 | 346 |
| fig 6666666.28482.peg.5403 | R006418 | (gi:148660359) mce2B (MRA 0597) - MCE-family protein Mce2B [Mycobacterium tuberculosis str. H37Ra]             | 65.37 | 257 | 346 |
| fig 6666666.28482.peg.5403 | R013519 | (gi:148821792) mce2B (TBFG 10601) - MCE-family protein mce2B [Mycobacterium tuberculosis str. F11]             | 65.37 | 257 | 346 |
| fig 6666666.28482.peg.5403 | R006419 | (gi:15839992) mce2B (MT0619) - virulence factor mce family protein [Mycobacterium tuberculosis str. CDC1551]   | 64.98 | 257 | 346 |
| fig 6666666.28482.peg.5404 | R006370 | (gi:118467050) mce1C (MAV 5013) - mce-family protein mce1c [Mycobacterium avium str. 104]                      | 76.88 | 505 | 519 |
| fig 6666666.28482.peg.5404 | R006369 | (gi:41409704) mce1C (MAP3606) - hypothetical protein [Mycobacterium avium str. K-10 (subsp. paratuberculosis)] | 75.88 | 480 | 519 |
| fig 6666666.28482.peg.5404 | R019334 | (gi:183980445) mce1C (MMAR 0414) - MCE-family protein Mce1C [Mycobacterium marinum str. M]                     | 74.69 | 480 | 519 |
| fig 6666666.28482.peg.5404 | R019336 | (gi:340625208) mce1C (MCAN 01771) - MCE-family protein MCE1C [Mycobacterium canettii str. CIPT 140010059]      | 76.18 | 465 | 519 |
| fig 6666666.28482.peg.5404 | R006364 | (gi:15607312) mce1C (Rv0171) - MCE-FAMILY PROTEIN MCE1C [Mycobacterium tuberculosis str. H37Rv]                | 75.54 | 465 | 519 |
| fig 6666666.28482.peg.5404 | R006365 | (gi:148659935) mce1C (MRA 0179) - MCE-family protein Mce1C [Mycobacterium tuberculosis str. H37Ra]             | 75.54 | 465 | 519 |
| fig 6666666.28482.peg.5404 | R013514 | (gi:148821363) mce1C (TBFG 10172) - MCE-family protein mce1C [Mycobacterium tuberculosis str. F11]             | 75.54 | 465 | 519 |
| fig 6666666.28482.peg.5404 | R019338 | (gi:224988556) mce1C (JTY 0177) - MCE-family protein [Mycobacterium bovis str. BCG str. Tokyo 172]             | 75.32 | 465 | 519 |
| fig 6666666.28482.peg.5404 | R006368 | (gi:121636083) mce1C (BCG 0208) - MCE-family protein mce1C [Mycobacterium bovis str. BCG Pasteur 1173P2]       | 75.32 | 465 | 519 |
| fig 6666666.28482.peg.5404 | R006367 | (gi:31791349) mce1C (Mb0177) - MCE-FAMILY PROTEIN MCE1C [Mycobacterium bovis str. AF2122/97]                   | 75.32 | 465 | 519 |

|                            |         |                                                                                                              |       |     |     |
|----------------------------|---------|--------------------------------------------------------------------------------------------------------------|-------|-----|-----|
| fig 6666666.28482.peg.5404 | R019335 | (gi:339630252) mce1C (MAF 01720) - MCE-family protein MCE1C [Mycobacterium africanum str. GM041182]          | 75.32 | 465 | 519 |
| fig 6666666.28482.peg.5404 | R006366 | (gi:15839549) mce1C (MT0180) - virulence factor mce family protein [Mycobacterium tuberculosis str. CDC1551] | 75.88 | 455 | 519 |
| fig 6666666.28482.peg.5404 | R006371 | (gi:15828395) mce1C (ML2591) - putative secreted protein [Mycobacterium leprae str. TN]                      | 68.99 | 505 | 519 |
| fig 6666666.28482.peg.5404 | R019339 | (gi:221230872) mce1C (MLBr 02591) - putative secreted protein [Mycobacterium leprae str. Br4923]             | 68.99 | 505 | 519 |
| fig 6666666.28482.peg.5404 | R006372 | (gi:118616797) mce1C (MUL 1064) - MCE-family protein Mce1C [Mycobacterium ulcerans str. Agy99]               | 74.07 | 480 | 519 |
| fig 6666666.28482.peg.5404 | R019337 | (gi:253797093) mce1C (TBMG 00172) - MCE-family protein mce1C [Mycobacterium tuberculosis str. KZN 1435]      | 75.88 | 451 | 519 |
| fig 6666666.28482.peg.5404 | R006438 | (gi:126432723) mce2C (Mjls 0110) - virulence factor Mce family protein [Mycobacterium sp. str. JLS]          | 62.32 | 478 | 519 |
| fig 6666666.28482.peg.5404 | R019371 | (gi:339630659) mce2C (MAF 05980) - MCE-family protein MCE2C [Mycobacterium africanum str. GM041182]          | 68.58 | 470 | 519 |
| fig 6666666.28482.peg.5404 | R019374 | (gi:224988981) mce2C (JTY 0606) - MCE-family protein [Mycobacterium bovis str. BCG str. Tokyo 172]           | 68.37 | 470 | 519 |
| fig 6666666.28482.peg.5404 | R006433 | (gi:121636509) mce2C (BCG 0636) - mce-family protein mce2C [Mycobacterium bovis str. BCG Pasteur 1173P2]     | 68.37 | 470 | 519 |
| fig 6666666.28482.peg.5404 | R006432 | (gi:31791773) mce2C (Mb0606) - MCE-FAMILY PROTEIN MCE2C [Mycobacterium bovis str. AF2122/97]                 | 68.37 | 470 | 519 |
| fig 6666666.28482.peg.5404 | R019373 | (gi:253797526) mce2C (TBMG 00599) - MCE-family protein mce2C [Mycobacterium tuberculosis str. KZN 1435]      | 68.37 | 470 | 519 |
| fig 6666666.28482.peg.5404 | R006429 | (gi:15607731) mce2C (Rv0591) - MCE-FAMILY PROTEIN MCE2C [Mycobacterium tuberculosis str. H37Rv]              | 68.37 | 470 | 519 |
| fig 6666666.28482.peg.5404 | R006430 | (gi:148660361) mce2C (MRA 0599) - MCE-family protein Mce2C [Mycobacterium tuberculosis str. H37Ra]           | 68.37 | 470 | 519 |
| fig 6666666.28482.peg.5404 | R013520 | (gi:148821794) mce2C (TBFG 10603) - MCE-family protein mce2C [Mycobacterium tuberculosis str. F11]           | 68.37 | 470 | 519 |
| fig 6666666.28482.peg.5404 | R019372 | (gi:340625621) mce2C (MCAN 05971) - MCE-family protein MCE2C [Mycobacterium canettii str. CIPT 140010059]    | 68.58 | 470 | 519 |



|                            |         |                                                                                                                          |       |     |     |
|----------------------------|---------|--------------------------------------------------------------------------------------------------------------------------|-------|-----|-----|
| fig 6666666.28482.peg.5404 | R006437 | (gi:120401164) mce2C (Mvan 0136) - virulence factor Mce family protein [Mycobacterium vanbaalenii str. PYR-1]            | 64    | 448 | 519 |
| fig 6666666.28482.peg.5404 | R006440 | (gi:108797100) mce2C (Mmcs 0120) - Mammalian cell entry [Mycobacterium sp. str. MCS]                                     | 62.73 | 478 | 519 |
| fig 6666666.28482.peg.5404 | R006439 | (gi:119866185) mce2C (Mkms 0129) - virulence factor Mce family protein [Mycobacterium sp. str. KMS]                      | 62.73 | 478 | 519 |
| fig 6666666.28482.peg.5404 | R006373 | (gi:118473407) mce1C (MSMEG 0136) - virulence factor Mce family protein, putative [Mycobacterium smegmatis str. MC2 155] | 61.43 | 475 | 519 |
| fig 6666666.28482.peg.5404 | R006435 | (gi:118463703) mce2C (MAV 4549) - mce-family protein mce2c [Mycobacterium avium str. 104]                                | 65.96 | 467 | 519 |
| fig 6666666.28482.peg.5404 | R006434 | (gi:41410184) mce2C (MAP4086) - hypothetical protein [Mycobacterium avium str. K-10 (subsp. paratuberculosis)]           | 65.53 | 467 | 519 |
| fig 6666666.28482.peg.5404 | R006436 | (gi:145221304) mce2C (Mflv 0709) - virulence factor Mce family protein [Mycobacterium gilvum str. PYR-GCK]               | 62.67 | 448 | 519 |
| fig 6666666.28482.peg.5404 | R006431 | (gi:15839994) mce2C (MT0621) - virulence factor mce family protein [Mycobacterium tuberculosis str. CDC1551]             | 66.57 | 356 | 519 |
| fig 6666666.28482.peg.5405 | R006379 | (gi:41409705) mce1D (MAP3607) - hypothetical protein [Mycobacterium avium str. K-10 (subsp. paratuberculosis)]           | 81.97 | 466 | 505 |
| fig 6666666.28482.peg.5405 | R006380 | (gi:118466487) mce1D (MAV 5012) - mce-family protein mce1d [Mycobacterium avium str. 104]                                | 81.97 | 466 | 505 |
| fig 6666666.28482.peg.5405 | R019344 | (gi:253797094) mce1D (TBMG 00173) - MCE-family protein mce1D [Mycobacterium tuberculosis str. KZN 1435]                  | 80.77 | 468 | 505 |
| fig 6666666.28482.peg.5405 | R013515 | (gi:148821364) mce1D (TBFG 10173) - MCE-family protein mce1D [Mycobacterium tuberculosis str. F11]                       | 80.77 | 468 | 505 |
| fig 6666666.28482.peg.5405 | R006374 | (gi:15607313) mce1D (Rv0172) - MCE-FAMILY PROTEIN MCE1D [Mycobacterium tuberculosis str. H37Rv]                          | 80.77 | 468 | 505 |
| fig 6666666.28482.peg.5405 | R006375 | (gi:148659936) mce1D (MRA 0180) - MCE-family protein Mce1D [Mycobacterium tuberculosis str. H37Ra]                       | 80.77 | 468 | 505 |
| fig 6666666.28482.peg.5405 | R006376 | (gi:15839550) mce1D (MT0181) - virulence factor mce family protein [Mycobacterium tuberculosis str. CDC1551]             | 80.77 | 468 | 505 |
| fig 6666666.28482.peg.5405 | R019345 | (gi:224988557) mce1D (JTY 0178) - MCE-family protein [Mycobacterium bovis str. BCG str. Tokyo 172]                       | 80.77 | 468 | 505 |

|                            |         |                                                                                                              |       |     |     |
|----------------------------|---------|--------------------------------------------------------------------------------------------------------------|-------|-----|-----|
| fig 6666666.28482.peg.5405 | R006378 | (gi:121636084) mce1D (BCG 0209) - MCE-family protein mce1D [Mycobacterium bovis str. BCG Pasteur 1173P2]     | 80.77 | 468 | 505 |
| fig 6666666.28482.peg.5405 | R006377 | (gi:31791350) mce1D (Mb0178) - MCE-FAMILY PROTEIN MCE1D [Mycobacterium bovis str. AF2122/97]                 | 80.77 | 468 | 505 |
| fig 6666666.28482.peg.5405 | R019342 | (gi:339630253) mce1D (MAF 01730) - MCE-family protein MCE1D [Mycobacterium africanum str. GM041182]          | 80.77 | 468 | 505 |
| fig 6666666.28482.peg.5405 | R019343 | (gi:340625209) mce1D (MCAN 01781) - MCE-family protein MCE1D [Mycobacterium canettii str. CIPT 140010059]    | 80.77 | 468 | 505 |
| fig 6666666.28482.peg.5405 | R019341 | (gi:183980446) mce1D (MMAR 0415) - MCE-family protein Mce1D [Mycobacterium marinum str. M]                   | 79.91 | 468 | 505 |
| fig 6666666.28482.peg.5405 | R006382 | (gi:118616798) mce1D (MUL 1065) - MCE-family protein Mce1D [Mycobacterium ulcerans str. Agy99]               | 79.49 | 468 | 505 |
| fig 6666666.28482.peg.5405 | R006381 | (gi:15828396) mce1D (ML2592) - putative secreted protein [Mycobacterium leprae str. TN]                      | 77.59 | 482 | 505 |
| fig 6666666.28482.peg.5405 | R019346 | (gi:221230873) mce1D (MLBr 02592) - putative secreted protein [Mycobacterium leprae str. Br4923]             | 77.59 | 482 | 505 |
| fig 6666666.28482.peg.5405 | R019347 | (gi:333988765) mce1D (JDM601 0125) - MCE-family protein Mce1D [Mycobacterium sp. str. JDM601]                | 68.24 | 465 | 505 |
| fig 6666666.28482.peg.5405 | R019377 | (gi:253797527) mce2D (TBMG 00600) - MCE-family protein mce2D [Mycobacterium tuberculosis str. KZN 1435]      | 69.82 | 444 | 505 |
| fig 6666666.28482.peg.5405 | R006441 | (gi:15607732) mce2D (Rv0592) - MCE-FAMILY PROTEIN MCE2D [Mycobacterium tuberculosis str. H37Rv]              | 69.82 | 444 | 505 |
| fig 6666666.28482.peg.5405 | R006442 | (gi:148660362) mce2D (MRA 0600) - MCE-family protein Mce2D [Mycobacterium tuberculosis str. H37Ra]           | 69.82 | 444 | 505 |
| fig 6666666.28482.peg.5405 | R013521 | (gi:148821795) mce2D (TBFG 10604) - MCE-family protein mce2D [Mycobacterium tuberculosis str. F11]           | 69.82 | 444 | 505 |
| fig 6666666.28482.peg.5405 | R006443 | (gi:15839995) mce2D (MT0622) - virulence factor mce family protein [Mycobacterium tuberculosis str. CDC1551] | 69.82 | 444 | 505 |
| fig 6666666.28482.peg.5405 | R019376 | (gi:340625622) mce2D (MCAN 05981) - MCE-family protein MCE2D [Mycobacterium canettii str. CIPT 140010059]    | 69.82 | 444 | 505 |
| fig 6666666.28482.peg.5405 | R019375 | (gi:339630660) mce2D (MAF 05990) - MCE-family protein MCE2D [Mycobacterium africanum str. GM041182]          | 69.82 | 444 | 505 |

|                            |         |                                                                                                                          |       |     |     |
|----------------------------|---------|--------------------------------------------------------------------------------------------------------------------------|-------|-----|-----|
| fig 6666666.28482.peg.5405 | R006444 | (gi:31791774) mce2D (Mb0607) - MCE-FAMILY PROTEIN MCE2DA [FIRST PART]<br>[Mycobacterium bovis str. AF2122/97]            | 69.91 | 432 | 505 |
| fig 6666666.28482.peg.5405 | R019378 | (gi:224988982) mce2D (JTY 0607) - MCE-family protein [Mycobacterium bovis str. BCG str. Tokyo 172]                       | 69.43 | 435 | 505 |
| fig 6666666.28482.peg.5405 | R006445 | (gi:121636510) mce2D (BCG 0637) - mce-family protein mce2Da [Mycobacterium bovis str. BCG Pasteur 1173P2]                | 69.43 | 435 | 505 |
| fig 6666666.28482.peg.5405 | R006452 | (gi:108797101) mce2D (Mmcs 0121) - Mammalian cell entry [Mycobacterium sp. str. MCS]                                     | 68.5  | 447 | 505 |
| fig 6666666.28482.peg.5405 | R006451 | (gi:119866186) mce2D (Mkms 0130) - virulence factor Mce family protein<br>[Mycobacterium sp. str. KMS]                   | 68.5  | 447 | 505 |
| fig 6666666.28482.peg.5405 | R006450 | (gi:126432724) mce2D (Mjls 0111) - virulence factor Mce family protein<br>[Mycobacterium sp. str. JLS]                   | 68.5  | 447 | 505 |
| fig 6666666.28482.peg.5405 | R006446 | (gi:41410185) mce2D (MAP4087) - hypothetical protein [Mycobacterium avium str. K-10 (subsp. paratuberculosis)]           | 65.77 | 481 | 505 |
| fig 6666666.28482.peg.5405 | R006447 | (gi:118464414) mce2D (MAV 4548) - virulence factor mce family protein<br>[Mycobacterium avium str. 104]                  | 65.77 | 481 | 505 |
| fig 6666666.28482.peg.5405 | R006383 | (gi:118471615) mce1D (MSMEG 0137) - virulence factor mce family protein<br>[Mycobacterium smegmatis str. MC2 155]        | 65.36 | 449 | 505 |
| fig 6666666.28482.peg.5405 | R006448 | (gi:145221303) mce2D (Mflv 0708) - virulence factor Mce family protein<br>[Mycobacterium gilvum str. PYR-GCK]            | 65.05 | 448 | 505 |
| fig 6666666.28482.peg.5405 | R006449 | (gi:120401165) mce2D (Mvan 0137) - virulence factor Mce family protein<br>[Mycobacterium vanbaalenii str. PYR-1]         | 64.67 | 443 | 505 |
| fig 6666666.28482.peg.5406 | R006389 | (gi:41409706) mce1E (MAP3608) - LprK [Mycobacterium avium str. K-10 (subsp. paratuberculosis)]                           | 75.99 | 379 | 392 |
| fig 6666666.28482.peg.5406 | R006390 | (gi:118466982) mce1E (MAV 5011) - virulence factor Mce family protein<br>[Mycobacterium avium str. 104]                  | 75.99 | 379 | 392 |
| fig 6666666.28482.peg.5406 | R019350 | (gi:340625210) mce1E (MCAN 01791) - putative MCE-family lipoprotein LPRK<br>[Mycobacterium canettii str. CIPT 140010059] | 76.7  | 382 | 392 |
| fig 6666666.28482.peg.5406 | R006391 | (gi:15828397) mce1E (ML2593) - putative lipoprotein [Mycobacterium leprae str. TN]                                       | 73.16 | 380 | 392 |
| fig 6666666.28482.peg.5406 | R019353 | (gi:221230874) mce1E (MLBr 02593) - putative lipoprotein [Mycobacterium leprae str. Br4923]                              | 73.16 | 380 | 392 |

|                            |         |                                                                                                                                                     |       |     |     |
|----------------------------|---------|-----------------------------------------------------------------------------------------------------------------------------------------------------|-------|-----|-----|
| fig 6666666.28482.peg.5406 | R019348 | (gi:183980447) mce1E (MMAR 0416) - MCE family lipoprotein LprK [Mycobacterium marinum str. M]                                                       | 72.51 | 382 | 392 |
| fig 6666666.28482.peg.5406 | R019351 | (gi:253797095) mce1E (TBMG 00174) - MCE-family lipoprotein mce1E [Mycobacterium tuberculosis str. KZN 1435]                                         | 76.44 | 382 | 392 |
| fig 6666666.28482.peg.5406 | R006386 | (gi:15839551) mce1E (MT0182) - virulence factor mce family protein [Mycobacterium tuberculosis str. CDC1551]                                        | 76.44 | 382 | 392 |
| fig 6666666.28482.peg.5406 | R006384 | (gi:15607314) mce1E (Rv0173) - POSSIBLE MCE-FAMILY LIPOPROTEIN LPRK (MCE-FAMILY LIPOPROTEIN MCE1E) [Mycobacterium tuberculosis str. H37Rv]          | 76.44 | 382 | 392 |
| fig 6666666.28482.peg.5406 | R006385 | (gi:148659937) mce1E (MRA 0181) - MCE-family lipoprotein LprK [Mycobacterium tuberculosis str. H37Ra]                                               | 76.44 | 382 | 392 |
| fig 6666666.28482.peg.5406 | R013516 | (gi:148821365) mce1E (TBFG 10174) - MCE-family lipoprotein lprK (MCE-family lipoprotein mce1e) [Mycobacterium tuberculosis str. F11]                | 76.44 | 382 | 392 |
| fig 6666666.28482.peg.5406 | R019352 | (gi:224988558) mce1E (JTY 0179) - putative MCE-family lipoprotein mce1E [Mycobacterium bovis str. BCG str. Tokyo 172]                               | 76.44 | 382 | 392 |
| fig 6666666.28482.peg.5406 | R006388 | (gi:121636085) mce1E (BCG 0210) - putative mce-family lipoprotein lprK (MCE-family lipoprotein mce1E) [Mycobacterium bovis str. BCG Pasteur 1173P2] | 76.44 | 382 | 392 |
| fig 6666666.28482.peg.5406 | R006387 | (gi:31791351) mce1E (Mb0179) - POSSIBLE MCE-FAMILY LIPOPROTEIN LPRK (MCE-FAMILY LIPOPROTEIN MCE1E) [Mycobacterium bovis str. AF2122/97]             | 76.44 | 382 | 392 |
| fig 6666666.28482.peg.5406 | R019349 | (gi:339630254) mce1E (MAF 01740) - putative MCE-family lipoprotein LprK (MCE-family lipoprotein Mce1E) [Mycobacterium africanum str. GM041182]      | 76.44 | 382 | 392 |
| fig 6666666.28482.peg.5406 | R006392 | (gi:118616799) mce1E (MUL 1066) - MCE-family lipoprotein LprK (MCE-family lipoprotein Mce1E) [Mycobacterium ulcerans str. Agy99]                    | 71.99 | 382 | 392 |
| fig 6666666.28482.peg.5406 | R006393 | (gi:118472695) mce1E (MSMEG 0138) - virulence factor Mce family protein [Mycobacterium smegmatis str. MC2 155]                                      | 66.94 | 360 | 392 |
| fig 6666666.28482.peg.5406 | R019380 | (gi:340625623) mce2E (MCAN 05991) - putative MCE-family lipoprotein LPRL [Mycobacterium canettii str. CIPT 140010059]                               | 65.14 | 370 | 392 |
| fig 6666666.28482.peg.5406 | R006461 | (gi:120401166) mce2E (Mvan 0138) - virulence factor Mce family protein [Mycobacterium vanbaalenii str. PYR-1]                                       | 64.35 | 359 | 392 |
| fig 6666666.28482.peg.5406 | R006460 | (gi:145221302) mce2E (Mflv 0707) - virulence factor Mce family protein [Mycobacterium gilvum str. PYR-GCK]                                          | 64.17 | 360 | 392 |

|                            |         |                                                                                                                                                |       |     |     |
|----------------------------|---------|------------------------------------------------------------------------------------------------------------------------------------------------|-------|-----|-----|
| fig 6666666.28482.peg.5406 | R019381 | (gi:253797528) mce2E (TBMG 00601) - MCE-family lipoprotein mce2E [Mycobacterium tuberculosis str. KZN 1435]                                    | 64.59 | 370 | 392 |
| fig 6666666.28482.peg.5406 | R006453 | (gi:15607733) mce2E (Rv0593) - POSSIBLE MCE-FAMILY LIPOPROTEIN LPRL (MCE-FAMILY LIPOPROTEIN MCE2E) [Mycobacterium tuberculosis str. H37Rv]     | 64.59 | 370 | 392 |
| fig 6666666.28482.peg.5406 | R006454 | (gi:148660363) mce2E (MRA 0601) - MCE-family lipoprotein LprL [Mycobacterium tuberculosis str. H37Ra]                                          | 64.59 | 370 | 392 |
| fig 6666666.28482.peg.5406 | R013522 | (gi:148821796) mce2E (TBFG 10605) - MCE-family lipoprotein lprL (MCE-family lipoprotein mce2e) [Mycobacterium tuberculosis str. F11]           | 64.59 | 370 | 392 |
| fig 6666666.28482.peg.5406 | R006455 | (gi:15839996) mce2E (MT0623) - virulence factor mce family protein [Mycobacterium tuberculosis str. CDC1551]                                   | 64.59 | 370 | 392 |
| fig 6666666.28482.peg.5406 | R019382 | (gi:224988983) mce2E (JTY 0608) - putative MCE-family lipoprotein [Mycobacterium bovis str. BCG str. Tokyo 172]                                | 64.59 | 370 | 392 |
| fig 6666666.28482.peg.5406 | R006457 | (gi:121636511) mce2E (BCG 0639) - putative mce-family lipoprotein lprL [Mycobacterium bovis str. BCG Pasteur 1173P2]                           | 64.59 | 370 | 392 |
| fig 6666666.28482.peg.5406 | R019379 | (gi:339630661) mce2E (MAF 06000) - putative MCE-family lipoprotein LPRL (MCE-family lipoprotein MCE2E) [Mycobacterium africanum str. GM041182] | 64.59 | 370 | 392 |
| fig 6666666.28482.peg.5406 | R006464 | (gi:108797102) mce2E (Mmcs 0122) - Mammalian cell entry [Mycobacterium sp. str. MCS]                                                           | 65.96 | 379 | 392 |
| fig 6666666.28482.peg.5406 | R006463 | (gi:119866187) mce2E (Mkms 0131) - virulence factor Mce family protein [Mycobacterium sp. str. KMS]                                            | 65.96 | 379 | 392 |
| fig 6666666.28482.peg.5406 | R006462 | (gi:126432725) mce2E (Mjls 0112) - virulence factor Mce family protein [Mycobacterium sp. str. JLS]                                            | 65.7  | 379 | 392 |
| fig 6666666.28482.peg.5406 | R006459 | (gi:118462367) mce2E (MAV 4547) - virulence factor Mce family protein [Mycobacterium avium str. 104]                                           | 63.96 | 369 | 392 |
| fig 6666666.28482.peg.5406 | R006458 | (gi:41410186) mce2E (MAP4088) - LprL [Mycobacterium avium str. K-10 (subsp. paratuberculosis)]                                                 | 63.69 | 369 | 392 |
| fig 6666666.28482.peg.5406 | R019354 | (gi:333988766) mce1E (JDM601 0126) - MCE family lipoprotein LprK [Mycobacterium sp. str. JDM601]                                               | 61.74 | 379 | 392 |
| fig 6666666.28482.peg.5407 | R006399 | (gi:41409707) mce1F (MAP3609) - hypothetical protein [Mycobacterium avium str. K-10 (subsp. paratuberculosis)]                                 | 76.65 | 514 | 516 |

|                            |         |                                                                                                              |       |     |     |
|----------------------------|---------|--------------------------------------------------------------------------------------------------------------|-------|-----|-----|
| fig 6666666.28482.peg.5407 | R006401 | (gi:15828398) mce1F (ML2594) - putative secreted protein [Mycobacterium leprae str. TN]                      | 75.49 | 514 | 516 |
| fig 6666666.28482.peg.5407 | R019360 | (gi:221230875) mce1F (MLBr 02594) - putative secreted protein [Mycobacterium leprae str. Br4923]             | 75.49 | 514 | 516 |
| fig 6666666.28482.peg.5407 | R019355 | (gi:183980448) mce1F (MMAR 0417) - MCE-family protein Mce1F [Mycobacterium marinum str. M]                   | 76.94 | 514 | 516 |
| fig 6666666.28482.peg.5407 | R006402 | (gi:118616800) mce1F (MUL 1067) - MCE-family protein Mce1F [Mycobacterium ulcerans str. Agy99]               | 76.55 | 514 | 516 |
| fig 6666666.28482.peg.5407 | R019358 | (gi:253797096) mce1F (TBMG 00175) - MCE-family protein mce1F [Mycobacterium tuberculosis str. KZN 1435]      | 78.21 | 514 | 516 |
| fig 6666666.28482.peg.5407 | R013517 | (gi:148821366) mce1F (TBFG 10175) - MCE-family protein mce1F [Mycobacterium tuberculosis str. F11]           | 78.21 | 514 | 516 |
| fig 6666666.28482.peg.5407 | R006396 | (gi:15839552) mce1F (MT0183) - virulence factor mce family protein [Mycobacterium tuberculosis str. CDC1551] | 78.21 | 514 | 516 |
| fig 6666666.28482.peg.5407 | R019359 | (gi:224988559) mce1F (JTY 0180) - MCE-family protein [Mycobacterium bovis str. BCG str. Tokyo 172]           | 78.21 | 514 | 516 |
| fig 6666666.28482.peg.5407 | R006398 | (gi:121636086) mce1F (BCG 0211) - MCE-family protein mce1F [Mycobacterium bovis str. BCG Pasteur 1173P2]     | 78.21 | 514 | 516 |
| fig 6666666.28482.peg.5407 | R006397 | (gi:31791352) mce1F (Mb0180) - MCE-FAMILY PROTEIN MCE1F [Mycobacterium bovis str. AF2122/97]                 | 78.21 | 514 | 516 |
| fig 6666666.28482.peg.5407 | R019356 | (gi:339630255) mce1F (MAF 01750) - MCE-family protein MCE1F [Mycobacterium africanum str. GM041182]          | 78.21 | 514 | 516 |
| fig 6666666.28482.peg.5407 | R019357 | (gi:340625211) mce1F (MCAN 01801) - MCE-family protein MCE1F [Mycobacterium canettii str. CIPT 140010059]    | 78.02 | 514 | 516 |
| fig 6666666.28482.peg.5407 | R006394 | (gi:15607315) mce1F (Rv0174) - MCE-FAMILY PROTEIN MCE1F [Mycobacterium tuberculosis str. H37Rv]              | 78.02 | 514 | 516 |
| fig 6666666.28482.peg.5407 | R006395 | (gi:148659938) mce1F (MRA 0182) - MCE-family protein Mce1F [Mycobacterium tuberculosis str. H37Ra]           | 78.02 | 514 | 516 |
| fig 6666666.28482.peg.5407 | R006476 | (gi:108797103) mce2F (Mmcs 0123) - Mammalian cell entry [Mycobacterium sp. str. MCS]                         | 69.5  | 514 | 516 |
| fig 6666666.28482.peg.5407 | R006475 | (gi:119866188) mce2F (Mkms 0132) - virulence factor Mce family protein [Mycobacterium sp. str. KMS]          | 69.5  | 514 | 516 |

|                            |         |                                                                                                                |       |     |     |
|----------------------------|---------|----------------------------------------------------------------------------------------------------------------|-------|-----|-----|
| fig 6666666.28482.peg.5407 | R006474 | (gi:126432726) mce2F (Mjls 0113) - virulence factor Mce family protein [Mycobacterium sp. str. JLS]            | 69.31 | 514 | 516 |
| fig 6666666.28482.peg.5407 | R019385 | (gi:253797529) mce2F (TBMG 00602) - MCE-family protein mce2F [Mycobacterium tuberculosis str. KZN 1435]        | 69.13 | 514 | 516 |
| fig 6666666.28482.peg.5407 | R006465 | (gi:15607734) mce2F (Rv0594) - MCE-FAMILY PROTEIN MCE2F [Mycobacterium tuberculosis str. H37Rv]                | 69.13 | 514 | 516 |
| fig 6666666.28482.peg.5407 | R006466 | (gi:148660364) mce2F (MRA 0602) - MCE-family protein Mce2F [Mycobacterium tuberculosis str. H37Ra]             | 69.13 | 514 | 516 |
| fig 6666666.28482.peg.5407 | R013523 | (gi:148821797) mce2F (TBFG 10606) - MCE-family protein mce2F [Mycobacterium tuberculosis str. F11]             | 69.13 | 514 | 516 |
| fig 6666666.28482.peg.5407 | R019386 | (gi:224988984) mce2F (JTY 0609) - MCE-family protein [Mycobacterium bovis str. BCG str. Tokyo 172]             | 69.13 | 514 | 516 |
| fig 6666666.28482.peg.5407 | R006469 | (gi:121636512) mce2F (BCG 0640) - mce-family protein mce2F [Mycobacterium bovis str. BCG Pasteur 1173P2]       | 69.13 | 514 | 516 |
| fig 6666666.28482.peg.5407 | R006468 | (gi:31791776) mce2F (Mb0610) - MCE-FAMILY PROTEIN MCE2F [Mycobacterium bovis str. AF2122/97]                   | 69.13 | 514 | 516 |
| fig 6666666.28482.peg.5407 | R019383 | (gi:339630662) mce2F (MAF 06010) - MCE-family protein MCE2F [Mycobacterium africanum str. GM041182]            | 69.13 | 514 | 516 |
| fig 6666666.28482.peg.5407 | R006467 | (gi:15839997) mce2F (MT0624) - virulence factor mce family protein [Mycobacterium tuberculosis str. CDC1551]   | 69.13 | 514 | 516 |
| fig 6666666.28482.peg.5407 | R019384 | (gi:340625624) mce2F (MCAN 06001) - MCE-family protein MCE2F [Mycobacterium canettii str. CIPT 140010059]      | 68.93 | 514 | 516 |
| fig 6666666.28482.peg.5407 | R006403 | (gi:118473635) mce1F (MSMEG 0139) - mce-family protein mce1f [Mycobacterium smegmatis str. MC2 155]            | 68.98 | 514 | 516 |
| fig 6666666.28482.peg.5407 | R006470 | (gi:41410187) mce2F (MAP4089) - hypothetical protein [Mycobacterium avium str. K-10 (subsp. paratuberculosis)] | 68.47 | 516 | 516 |
| fig 6666666.28482.peg.5407 | R006471 | (gi:118463921) mce2F (MAV 4546) - mce-family protein mce2f [Mycobacterium avium str. 104]                      | 68.42 | 512 | 516 |
| fig 6666666.28482.peg.5407 | R006472 | (gi:145221301) mce2F (Mflv 0706) - virulence factor Mce family protein [Mycobacterium gilvum str. PYR-GCK]     | 65.26 | 514 | 516 |
| fig 6666666.28482.peg.5407 | R019361 | (gi:333988767) mce1F (JDM601 0127) - MCE-family protein Mce1F [Mycobacterium sp. str. JDM601]                  | 63.71 | 514 | 516 |

|                            |         |                                                                                                                                                                                                                 |       |     |     |
|----------------------------|---------|-----------------------------------------------------------------------------------------------------------------------------------------------------------------------------------------------------------------|-------|-----|-----|
| fig 6666666.28482.peg.5407 | R006473 | (gi:120401167) mce2F (Mvan 0139) - virulence factor Mce family protein [Mycobacterium vanbaalenii str. PYR-1]                                                                                                   | 65.83 | 514 | 516 |
| fig 6666666.28482.peg.5407 | R006400 | (gi:118462429) mce1F (MAV 5010) - mce-family protein mce1f [Mycobacterium avium str. 104]                                                                                                                       | 79.1  | 311 | 516 |
| fig 6666666.28482.peg.5543 | R006332 | (gi:118467123) relA (MAV 3464) - GTP pyrophosphokinase [Mycobacterium avium str. 104]                                                                                                                           | 94.69 | 789 | 797 |
| fig 6666666.28482.peg.5543 | R006331 | (gi:41407145) relA (MAP1047) - RelA [Mycobacterium avium str. K-10 (subsp. paratuberculosis)]                                                                                                                   | 94.8  | 786 | 797 |
| fig 6666666.28482.peg.5543 | R019316 | (gi:253798336) relA (TBMG 01390) - GTP pyrophosphokinase relA [Mycobacterium tuberculosis str. KZN 1435]                                                                                                        | 94.45 | 789 | 797 |
| fig 6666666.28482.peg.5543 | R006328 | (gi:15842122) relA (MT2660) - GTP pyrophosphokinase [Mycobacterium tuberculosis str. CDC1551]                                                                                                                   | 94.45 | 789 | 797 |
| fig 6666666.28482.peg.5543 | R006326 | (gi:15609720) relA (Rv2583c) - PROBABLE GTP PYROPHOSPHOKINASE RELA (ATP:GTP 3'-PYROPHOSPHOTRANSFERASE) (PPGPP SYNTHETASE I) ((P)PPGPP SYNTHETASE) (GTP DIPHOSPHOKINASE) [Mycobacterium tuberculosis str. H37Rv] | 94.56 | 786 | 797 |
| fig 6666666.28482.peg.5543 | R006327 | (gi:148662422) relA (MRA 2612) - GTP pyrophosphokinase RelA [Mycobacterium tuberculosis str. H37Ra]                                                                                                             | 94.56 | 786 | 797 |
| fig 6666666.28482.peg.5543 | R013511 | (gi:148823778) relA (TBFG 12603) - GTP pyrophosphokinase relA [Mycobacterium tuberculosis str. F11]                                                                                                             | 94.56 | 786 | 797 |
| fig 6666666.28482.peg.5543 | R019315 | (gi:340627600) relA (MCAN 26251) - putative GTP pyrophosphokinase RELA [Mycobacterium canettii str. CIPT 140010059]                                                                                             | 94.56 | 786 | 797 |
| fig 6666666.28482.peg.5543 | R019317 | (gi:224990962) relA (JTY 2600) - putative GTP pyrophosphokinase [Mycobacterium bovis str. BCG str. Tokyo 172]                                                                                                   | 94.56 | 786 | 797 |
| fig 6666666.28482.peg.5543 | R006330 | (gi:121638468) relA (BCG 2606c) - putative GTP pyrophosphokinase relA [Mycobacterium bovis str. BCG Pasteur 1173P2]                                                                                             | 94.56 | 786 | 797 |
| fig 6666666.28482.peg.5543 | R006329 | (gi:31793767) relA (Mb2614c) - PROBABLE GTP PYROPHOSPHOKINASE RELA (ATP:GTP 3'-PYROPHOSPHOTRANSFERASE) (PPGPP SYNTHETASE I) ((P)PPGPP SYNTHETASE) (GTP DIPHOSPHOKINASE) [Mycobacterium bovis str. AF2122/97]    | 94.56 | 786 | 797 |
| fig 6666666.28482.peg.5543 | R019314 | (gi:339632611) relA (MAF 26000) - putative GTP pyrophosphokinase RELA (ATP:GTP 3'-pyrophosphotransferase) [Mycobacterium africanum str. GM041182]                                                               | 94.56 | 786 | 797 |



|                            |         |                                                                                                                                   |       |     |     |
|----------------------------|---------|-----------------------------------------------------------------------------------------------------------------------------------|-------|-----|-----|
| fig 6666666.28482.peg.5543 | R019312 | (gi:183982138) relA (MMAR 2124) - GTP pyrophosphokinase RelA [Mycobacterium marinum str. M]                                       | 94.28 | 786 | 797 |
| fig 6666666.28482.peg.5543 | R006334 | (gi:118617353) relA (MUL 1729) - GTP pyrophosphokinase RelA [Mycobacterium ulcerans str. Agy99]                                   | 93.8  | 789 | 797 |
| fig 6666666.28482.peg.5543 | R006333 | (gi:15827167) relA (ML0491) - putative GTP pyrophosphokinase [Mycobacterium leprae str. TN]                                       | 93.77 | 786 | 797 |
| fig 6666666.28482.peg.5543 | R019318 | (gi:221229645) relA (MLBr 00491) - putative GTP pyrophosphokinase [Mycobacterium leprae str. Br4923]                              | 93.77 | 786 | 797 |
| fig 6666666.28482.peg.5543 | R006340 | (gi:108799247) relA (Mmcs 2280) - (p)ppGpp synthetase I, SpoT/RelA [Mycobacterium sp. str. MCS]                                   | 87.02 | 786 | 797 |
| fig 6666666.28482.peg.5543 | R006339 | (gi:119868363) relA (Mkms 2327) - (p)ppGpp synthetase I, SpoT/RelA [Mycobacterium sp. str. KMS]                                   | 87.02 | 786 | 797 |
| fig 6666666.28482.peg.5543 | R006337 | (gi:120403572) relA (Mvan 2587) - (p)ppGpp synthetase I, SpoT/RelA [Mycobacterium vanbaalenii str. PYR-1]                         | 88.82 | 778 | 797 |
| fig 6666666.28482.peg.5543 | R006338 | (gi:126434905) relA (Mjls 2319) - (p)ppGpp synthetase I, SpoT/RelA [Mycobacterium sp. str. JLS]                                   | 86.48 | 786 | 797 |
| fig 6666666.28482.peg.5543 | R019319 | (gi:333991010) relA (JDM601 2370) - GTP pyrophosphokinase RelA [Mycobacterium sp. str. JDM601]                                    | 87.66 | 783 | 797 |
| fig 6666666.28482.peg.5543 | R006335 | (gi:118471771) relA (MSMEG 2965) - GTP pyrophosphokinase [Mycobacterium smegmatis str. MC2 155]                                   | 91.6  | 738 | 797 |
| fig 6666666.28482.peg.5543 | R019313 | (gi:169629960) relA (MAB 2876c) - GTP pyrophosphokinase [Mycobacterium abscessus str. ATCC 19977]                                 | 88.77 | 772 | 797 |
| fig 6666666.28482.peg.5543 | R006336 | (gi:145224394) relA (Mflv 3812) - (p)ppGpp synthetase I, SpoT/RelA [Mycobacterium gilvum str. PYR-GCK]                            | 87.42 | 786 | 797 |
| fig 6666666.28482.peg.5582 | R006209 | (gi:118466812) phoP (MAV 0701) - DNA-binding response regulator PhoP [Mycobacterium avium str. 104]                               | 96.86 | 223 | 223 |
| fig 6666666.28482.peg.5582 | R006208 | (gi:41406689) phoP (MAP0591) - PhoP [Mycobacterium avium str. K-10 (subsp. paratuberculosis)]                                     | 96.41 | 223 | 223 |
| fig 6666666.28482.peg.5582 | R006205 | (gi:15840172) phoP (MT0782) - DNA-binding response regulator [Mycobacterium tuberculosis str. CDC1551]                            | 95.96 | 223 | 223 |
| fig 6666666.28482.peg.5582 | R019256 | (gi:253797703) phoP (TBMG 00772) - two component system transcriptional regulator phoP [Mycobacterium tuberculosis str. KZN 1435] | 95.96 | 223 | 223 |

|                            |         |                                                                                                                                                                |       |     |     |
|----------------------------|---------|----------------------------------------------------------------------------------------------------------------------------------------------------------------|-------|-----|-----|
| fig 6666666.28482.peg.5582 | R006203 | (gi:15607897) phoP (Rv0757) - POSSIBLE TWO COMPONENT SYSTEM RESPONSE TRANSCRIPTIONAL POSITIVE REGULATOR PHOP [Mycobacterium tuberculosis str. H37Rv]           | 95.96 | 223 | 223 |
| fig 6666666.28482.peg.5582 | R013503 | (gi:148821963) phoP (TBFG 10772) - two component system response transcriptional positive regulator phoP [Mycobacterium tuberculosis str. F11]                 | 95.96 | 223 | 223 |
| fig 6666666.28482.peg.5582 | R019255 | (gi:340625776) phoP (MCAN 07611) - putative two component system response transcriptional positive regulator PHOP [Mycobacterium canettii str. CIPT 140010059] | 95.96 | 223 | 223 |
| fig 6666666.28482.peg.5582 | R019257 | (gi:224989153) phoP (JTY 0779) - putative two component system response transcriptional positive regulator [Mycobacterium bovis str. BCG str. Tokyo 172]       | 95.96 | 223 | 223 |
| fig 6666666.28482.peg.5582 | R006207 | (gi:121636681) phoP (BCG 0809) - putative two component system response transcriptional positive regulator phoP [Mycobacterium bovis str. BCG Pasteur 1173P2]  | 95.96 | 223 | 223 |
| fig 6666666.28482.peg.5582 | R006206 | (gi:31791945) phoP (Mb0780) - POSSIBLE TWO COMPONENT SYSTEM RESPONSE TRANSCRIPTIONAL POSITIVE REGULATOR PHOP [Mycobacterium bovis str. AF2122/97]              | 95.96 | 223 | 223 |
| fig 6666666.28482.peg.5582 | R019254 | (gi:339630827) phoP (MAF 07690) - putative two component system response transcriptional positive regulator PHOP [Mycobacterium africanum str. GM041182]       | 95.96 | 223 | 223 |
| fig 6666666.28482.peg.5582 | R019252 | (gi:183984910) phoP (MMAR 4942) - two-component system response phosphate regulon transcriptional regulator, PhoP [Mycobacterium marinum str. M]               | 95.07 | 223 | 223 |
| fig 6666666.28482.peg.5582 | R006204 | (gi:148660534) phoP (MRA 0767) - putative two component system response transcriptional positive regulator PhoP [Mycobacterium tuberculosis str. H37Ra]        | 95.52 | 223 | 223 |
| fig 6666666.28482.peg.5582 | R006210 | (gi:118616306) phoP (MUL 0463) - two component system response phosphate regulon transcriptional regulator, PhoP [Mycobacterium ulcerans str. Agy99]           | 94.62 | 223 | 223 |
| fig 6666666.28482.peg.5582 | R019258 | (gi:333992254) phoP (JDM601 3614) - two-component system response phosphate regulon transcriptional regulator PhoP [Mycobacterium sp. str. JDM601]             | 93.27 | 223 | 223 |

|                            |         |                                                                                                                                        |       |     |     |
|----------------------------|---------|----------------------------------------------------------------------------------------------------------------------------------------|-------|-----|-----|
| fig 6666666.28482.peg.5582 | R006216 | (gi:108801553) phoP (Mmcs 4590) - two component transcriptional regulator, winged helix family [Mycobacterium sp. str. MCS]            | 91.48 | 223 | 223 |
| fig 6666666.28482.peg.5582 | R006215 | (gi:119870707) phoP (Mkms 4678) - two component transcriptional regulator, winged helix family [Mycobacterium sp. str. KMS]            | 91.48 | 223 | 223 |
| fig 6666666.28482.peg.5582 | R006214 | (gi:126437538) phoP (Mjls 4973) - two component transcriptional regulator, winged helix family [Mycobacterium sp. str. JLS]            | 91.48 | 223 | 223 |
| fig 6666666.28482.peg.5582 | R006211 | (gi:118471457) phoP (MSMEG 5872) - DNA-binding response regulator PhoP [Mycobacterium smegmatis str. MC2 155]                          | 92.38 | 223 | 223 |
| fig 6666666.28482.peg.5582 | R006213 | (gi:120406123) phoP (Mvan 5175) - two component transcriptional regulator, winged helix family [Mycobacterium vanbaalenii str. PYR-1]  | 90.58 | 223 | 223 |
| fig 6666666.28482.peg.5582 | R006212 | (gi:145222173) phoP (Mflv 1581) - two component transcriptional regulator, winged helix family [Mycobacterium gilvum str. PYR-GCK]     | 90.13 | 223 | 223 |
| fig 6666666.28482.peg.5582 | R019253 | (gi:169627776) phoP (MAB 0673) - putative DNA-binding response regulator PhoP [Mycobacterium abscessus str. ATCC 19977]                | 88.79 | 223 | 223 |
| fig 6666666.28482.peg.5583 | R006222 | (gi:41406690) phoR (MAP0592) - PhoR [Mycobacterium avium str. K-10 (subsp. paratuberculosis)]                                          | 90.81 | 468 | 480 |
| fig 6666666.28482.peg.5583 | R006223 | (gi:118464141) phoR (MAV 0703) - sensor histidine kinase PhoR [Mycobacterium avium str. 104]                                           | 90.6  | 468 | 480 |
| fig 6666666.28482.peg.5583 | R019259 | (gi:183984909) phoR (MMAR 4941) - two-component system response phosphate sensor kinase, PhoR [Mycobacterium marinum str. M]           | 81.46 | 477 | 480 |
| fig 6666666.28482.peg.5583 | R006224 | (gi:118616307) phoR (MUL 0464) - two component system response phosphate sensor kinase, PhoR [Mycobacterium ulcerans str. Agy99]       | 81.25 | 477 | 480 |
| fig 6666666.28482.peg.5583 | R006227 | (gi:120406122) phoR (Mvan 5174) - integral membrane sensor signal transduction histidine kinase [Mycobacterium vanbaalenii str. PYR-1] | 75.16 | 470 | 480 |
| fig 6666666.28482.peg.5583 | R006226 | (gi:145222174) phoR (Mflv 1582) - integral membrane sensor signal transduction histidine kinase [Mycobacterium gilvum str. PYR-GCK]    | 75.59 | 466 | 480 |
| fig 6666666.28482.peg.5583 | R006228 | (gi:126437537) phoR (Mjls 4972) - integral membrane sensor signal transduction histidine kinase [Mycobacterium sp. str. JLS]           | 76.12 | 468 | 480 |
| fig 6666666.28482.peg.5583 | R006230 | (gi:108801552) phoR (Mmcs 4589) - periplasmic sensor signal transduction histidine kinase [Mycobacterium sp. str. MCS]                 | 76.12 | 468 | 480 |
| fig 6666666.28482.peg.5583 | R006229 | (gi:119870706) phoR (Mkms 4677) - integral membrane sensor signal transduction histidine kinase [Mycobacterium sp. str. KMS]           | 76.12 | 468 | 480 |

|                            |         |                                                                                                                                                               |       |     |     |
|----------------------------|---------|---------------------------------------------------------------------------------------------------------------------------------------------------------------|-------|-----|-----|
| fig 6666666.28482.peg.5583 | R019263 | (gi:253797704) phoR (TBMG 00773) - two component system sensor kinase phoR [Mycobacterium tuberculosis str. KZN 1435]                                         | 75.21 | 471 | 480 |
| fig 6666666.28482.peg.5583 | R013504 | (gi:148821964) phoR (TBFG 10773) - two component system response sensor kinase membrane associated phoR [Mycobacterium tuberculosis str. F11]                 | 75.21 | 471 | 480 |
| fig 6666666.28482.peg.5583 | R006219 | (gi:15840173) phoR (MT0783) - sensor histidine kinase [Mycobacterium tuberculosis str. CDC1551]                                                               | 75.21 | 471 | 480 |
| fig 6666666.28482.peg.5583 | R006217 | (gi:15607898) phoR (Rv0758) - POSSIBLE TWO COMPONENT SYSTEM RESPONSE SENSOR KINASE MEMBRANE ASSOCIATED PHOR [Mycobacterium tuberculosis str. H37Rv]           | 75.21 | 471 | 480 |
| fig 6666666.28482.peg.5583 | R006218 | (gi:148660535) phoR (MRA 0768) - putative two component system response sensor kinase membrane associated PhoR [Mycobacterium tuberculosis str. H37Ra]        | 75.21 | 471 | 480 |
| fig 6666666.28482.peg.5583 | R019262 | (gi:340625777) phoR (MCAN 07621) - putative two component system response sensor kinase membrane associated PHOR [Mycobacterium canettii str. CIPT 140010059] | 75    | 471 | 480 |
| fig 6666666.28482.peg.5583 | R019264 | (gi:224989154) phoR (JTY 0780) - putative two component system response sensor kinase membrane associated [Mycobacterium bovis str. BCG str. Tokyo 172]       | 75    | 471 | 480 |
| fig 6666666.28482.peg.5583 | R006221 | (gi:121636682) phoR (BCG 0810) - putative two component system response sensor kinase membrane associated phoR [Mycobacterium bovis str. BCG Pasteur 1173P2]  | 75    | 471 | 480 |
| fig 6666666.28482.peg.5583 | R006220 | (gi:31791946) phoR (Mb0781) - POSSIBLE TWO COMPONENT SYSTEM RESPONSE SENSOR KINASE MEMBRANE ASSOCIATED PHOR [Mycobacterium bovis str. AF2122/97]              | 75    | 471 | 480 |
| fig 6666666.28482.peg.5583 | R019261 | (gi:339630828) phoR (MAF 07700) - putative two component system response sensor kinase membrane associated PHOR [Mycobacterium africanum str. GM041182]       | 74.79 | 471 | 480 |
| fig 6666666.28482.peg.5583 | R006225 | (gi:118468443) phoR (MSMEG 5870) - sensor histidine kinase PhoR [Mycobacterium smegmatis str. MC2 155]                                                        | 73.94 | 471 | 480 |
| fig 6666666.28482.peg.5583 | R019265 | (gi:333992253) phoR (JDM601 3613) - two-component system response phosphate sensor kinase PhoR [Mycobacterium sp. str. JDM601]                                | 70.66 | 465 | 480 |

|                            |         |                                                                                                                                 |       |     |     |
|----------------------------|---------|---------------------------------------------------------------------------------------------------------------------------------|-------|-----|-----|
| fig 6666666.28482.peg.5583 | R019260 | (gi:169627777) phoR (MAB 0674) - putative sensor histidine kinase PhoR [Mycobacterium abscessus str. ATCC 19977]                | 64.09 | 463 | 480 |
| fig 6666666.28482.peg.5649 | R019811 | (gi:253799760) esxM (TBMG 02785) - esat-6 like protein esxK [Mycobacterium tuberculosis str. KZN 1435]                          | 83.87 | 93  | 93  |
| fig 6666666.28482.peg.5649 | R019810 | (gi:340626804) esxM (MCAN 18101) - ESAT-6 like protein ESXM [Mycobacterium canettii str. CIPT 140010059]                        | 83.87 | 93  | 93  |
| fig 6666666.28482.peg.5649 | R019812 | (gi:224990177) esxM (JTY 1808) - hypothetical protein [Mycobacterium bovis str. BCG str. Tokyo 172]                             | 83.87 | 93  | 93  |
| fig 6666666.28482.peg.5649 | R014040 | (gi:121637693) esxM (BCG 1824) - hypothetical protein [Mycobacterium bovis str. BCG Pasteur 1173P2]                             | 83.87 | 93  | 93  |
| fig 6666666.28482.peg.5649 | R014039 | (gi:31792980) esxM (Mb1820) - hypothetical protein [Mycobacterium bovis str. AF2122/97]                                         | 83.87 | 93  | 93  |
| fig 6666666.28482.peg.5649 | R019809 | (gi:339631846) esxM (MAF 18140) - ESAT-6 like protein ESXM [Mycobacterium africanum str. GM041182]                              | 83.87 | 93  | 93  |
| fig 6666666.28482.peg.5649 | R014041 | (gi:118464008) esxM (MAV 2922) - hypothetical protein [Mycobacterium avium str. 104]                                            | 81.72 | 93  | 93  |
| fig 6666666.28482.peg.5649 | R019808 | (gi:183982681) esxM (MMAR 2674) - EsaT-6 like protein EsxM [Mycobacterium marinum str. M]                                       | 80.22 | 91  | 93  |
| fig 6666666.28482.peg.5649 | R014042 | (gi:118618466) esxM (MUL 3083) - EsaT-6 like protein EsxM [Mycobacterium ulcerans str. Agy99]                                   | 78.49 | 91  | 93  |
| fig 6666666.28482.peg.5650 | R014035 | (gi:118463289) esxN (MAV 2921) - hypothetical protein [Mycobacterium avium str. 104]                                            | 93.62 | 94  | 94  |
| fig 6666666.28482.peg.5650 | R019816 | (gi:253799165) esxN (TBMG 02203) - esat-6 like protein esxN [Mycobacterium tuberculosis str. KZN 1435]                          | 92.55 | 94  | 94  |
| fig 6666666.28482.peg.5650 | R014030 | (gi:57116914) esxN (Rv1793) - PUTATIVE ESAT-6 LIKE PROTEIN ESXN (ESAT-6 LIKE PROTEIN 5) [Mycobacterium tuberculosis str. H37Rv] | 92.55 | 94  | 94  |
| fig 6666666.28482.peg.5650 | R014031 | (gi:148661599) esxN (MRA 1806) - putative esat-6 like protein EsxN [Mycobacterium tuberculosis str. H37Ra]                      | 92.55 | 94  | 94  |
| fig 6666666.28482.peg.5650 | R014029 | (gi:148823007) esxN (TBFG 11824) - Esat-6 like protein esxN (Esat-6 like protein 5) [Mycobacterium tuberculosis str. F11]       | 92.55 | 94  | 94  |
| fig 6666666.28482.peg.5650 | R014032 | (gi:15841262) esxN (MT1842) - hypothetical protein [Mycobacterium tuberculosis str. CDC1551]                                    | 92.55 | 94  | 94  |

|                            |         |                                                                                                                                     |       |     |     |
|----------------------------|---------|-------------------------------------------------------------------------------------------------------------------------------------|-------|-----|-----|
| fig 6666666.28482.peg.5650 | R019815 | (gi:340626805) esxN (MCAN 18111) - putative ESAT-6 like protein ESXN [Mycobacterium canettii str. CIPT 140010059]                   | 92.55 | 94  | 94  |
| fig 6666666.28482.peg.5650 | R019817 | (gi:224990178) esxN (JTY 1809) - putative EsaT-6 like protein 5 [Mycobacterium bovis str. BCG str. Tokyo 172]                       | 92.55 | 94  | 94  |
| fig 6666666.28482.peg.5650 | R014034 | (gi:121637694) esxN (BCG 1825) - putative ESAT-6 like protein 5 [Mycobacterium bovis str. BCG Pasteur 1173P2]                       | 92.55 | 94  | 94  |
| fig 6666666.28482.peg.5650 | R014033 | (gi:31792981) esxN (Mb1821) - PUTATIVE ESAT-6 LIKE PROTEIN 5 [Mycobacterium bovis str. AF2122/97]                                   | 92.55 | 94  | 94  |
| fig 6666666.28482.peg.5650 | R019814 | (gi:339631847) esxN (MAF 18150) - putative ESAT-6 like protein ESXN (ESAT-6 like protein 5) [Mycobacterium africanum str. GM041182] | 92.55 | 94  | 94  |
| fig 6666666.28482.peg.5650 | R014036 | (gi:118618465) esxN (MUL 3082) - EsaT-6 like protein EsxN [Mycobacterium ulcerans str. Agy99]                                       | 92.55 | 94  | 94  |
| fig 6666666.28482.peg.5650 | R019813 | (gi:183982682) esxN (MMAR 2675) - EsaT-6 like protein EsxN [Mycobacterium marinum str. M]                                           | 92.55 | 94  | 94  |
| fig 6666666.28482.peg.5650 | R019818 | (gi:333990536) esxN (JDM601 1896) - EsaT-6 like protein EsxN [Mycobacterium sp. str. JDM601]                                        | 85.11 | 94  | 94  |
| fig 6666666.28482.peg.5714 | R018366 | (gi:41409876) eccA3 (MAP3778) - hypothetical protein [Mycobacterium avium str. K-90.11 10 (subsp. paratuberculosis)]                |       | 617 | 617 |
| fig 6666666.28482.peg.5714 | R018367 | (gi:118466988) eccA3 (MAV 4871) - ATPase AAA [Mycobacterium avium str. 104]                                                         | 90.28 | 617 | 617 |
| fig 6666666.28482.peg.5714 | R019661 | (gi:340625320) eccA3 (MCAN 02911) - hypothetical protein [Mycobacterium canettii str. CIPT 140010059]                               | 86.61 | 617 | 617 |
| fig 6666666.28482.peg.5714 | R019663 | (gi:224988670) eccA3 (JTY 0292) - hypothetical protein [Mycobacterium bovis str. BCG str. Tokyo 172]                                | 86.45 | 617 | 617 |
| fig 6666666.28482.peg.5714 | R018365 | (gi:121636197) eccA3 (BCG 0322) - hypothetical protein [Mycobacterium bovis str. BCG Pasteur 1173P2]                                | 86.45 | 617 | 617 |
| fig 6666666.28482.peg.5714 | R018364 | (gi:31791461) eccA3 (Mb0290) - hypothetical protein [Mycobacterium bovis str. AF2122/97]                                            | 86.45 | 617 | 617 |
| fig 6666666.28482.peg.5714 | R019660 | (gi:339630357) eccA3 (MAF 02840) - hypothetical protein [Mycobacterium africanum str. GM041182]                                     | 86.45 | 617 | 617 |
| fig 6666666.28482.peg.5714 | R019662 | (gi:253797209) eccA3 (TBMG 00287) - hypothetical protein [Mycobacterium tuberculosis str. KZN 1435]                                 | 86.45 | 617 | 617 |

|                            |         |                                                                                                                    |       |     |     |
|----------------------------|---------|--------------------------------------------------------------------------------------------------------------------|-------|-----|-----|
| fig 6666666.28482.peg.5714 | R018361 | (gi:15607423) eccA3 (Rv0282) - hypothetical protein [Mycobacterium tuberculosis str. H37Rv]                        | 86.45 | 617 | 617 |
| fig 6666666.28482.peg.5714 | R018362 | (gi:148660048) eccA3 (MRA 0291) - hypothetical protein [Mycobacterium tuberculosis str. H37Ra]                     | 86.45 | 617 | 617 |
| fig 6666666.28482.peg.5714 | R018360 | (gi:148821480) eccA3 (TBFG 10289) - hypothetical protein [Mycobacterium tuberculosis str. F11]                     | 86.45 | 617 | 617 |
| fig 6666666.28482.peg.5714 | R018363 | (gi:15839668) eccA3 (MT0295) - AAA family ATPase [Mycobacterium tuberculosis str. CDC1551]                         | 86.79 | 610 | 617 |
| fig 6666666.28482.peg.5714 | R019658 | (gi:183980569) eccA3 (MMAR 0541) - hypothetical protein [Mycobacterium marinum str. M]                             | 85.48 | 617 | 617 |
| fig 6666666.28482.peg.5714 | R018369 | (gi:118616918) eccA3 (MUL 1204) - hypothetical protein [Mycobacterium ulcerans str. Agy99]                         | 85.32 | 617 | 617 |
| fig 6666666.28482.peg.5714 | R018368 | (gi:15828368) eccA3 (ML2537) - hypothetical protein [Mycobacterium leprae str. TN]                                 | 83.68 | 616 | 617 |
| fig 6666666.28482.peg.5714 | R019664 | (gi:221230845) eccA3 (MLBr 02537) - hypothetical protein [Mycobacterium leprae str. Br4923]                        | 83.68 | 616 | 617 |
| fig 6666666.28482.peg.5714 | R019665 | (gi:333988930) eccA3 (JDM601 0290) - hypothetical protein [Mycobacterium sp. str. JDM601]                          | 78.61 | 617 | 617 |
| fig 6666666.28482.peg.5714 | R018375 | (gi:108797350) eccA3 (Mmcs 0370) - AAA ATPase, central region [Mycobacterium sp. str. MCS]                         | 74.75 | 592 | 617 |
| fig 6666666.28482.peg.5714 | R018374 | (gi:119866435) eccA3 (Mkms 0380) - ATPase central domain-containing protein [Mycobacterium sp. str. KMS]           | 74.75 | 592 | 617 |
| fig 6666666.28482.peg.5714 | R018373 | (gi:126432972) eccA3 (Mjls 0359) - ATPase central domain-containing protein [Mycobacterium sp. str. JLS]           | 74.75 | 592 | 617 |
| fig 6666666.28482.peg.5714 | R018372 | (gi:120401436) eccA3 (Mvan 0411) - ATPase central domain-containing protein [Mycobacterium vanbaalenii str. PYR-1] | 74.33 | 596 | 617 |
| fig 6666666.28482.peg.5714 | R018371 | (gi:145220933) eccA3 (Mflv 0329) - ATPase central domain-containing protein [Mycobacterium gilvum str. PYR-GCK]    | 73.2  | 596 | 617 |
| fig 6666666.28482.peg.5714 | R018370 | (gi:118467798) eccA3 (MSMEG 0615) - ATPase AAA [Mycobacterium smegmatis str. MC2 155]                              | 72.8  | 592 | 617 |
| fig 6666666.28482.peg.5714 | R019659 | (gi:169629320) eccA3 (MAB 2234c) - hypothetical protein [Mycobacterium abscessus str. ATCC 19977]                  | 70.54 | 594 | 617 |

|                            |         |                                                                                                                      |       |         |
|----------------------------|---------|----------------------------------------------------------------------------------------------------------------------|-------|---------|
| fig 6666666.28482.peg.5715 | R018382 | (gi:41409877) eccB3 (MAP3779) - hypothetical protein [Mycobacterium avium str. K-76.81 10 (subsp. paratuberculosis)] | 528   | 532     |
| fig 6666666.28482.peg.5715 | R019674 | (gi:183980570) eccB3 (MMAR 0542) - hypothetical protein [Mycobacterium marinum str. M]                               | 76.45 | 529 532 |
| fig 6666666.28482.peg.5715 | R019677 | (gi:340625321) eccB3 (MCAN 02921) - hypothetical protein [Mycobacterium canettii str. CIPT 140010059]                | 74.44 | 532 532 |
| fig 6666666.28482.peg.5715 | R018385 | (gi:118616919) eccB3 (MUL 1205) - hypothetical protein [Mycobacterium ulcerans str. Agy99]                           | 75.89 | 529 532 |
| fig 6666666.28482.peg.5715 | R019678 | (gi:253797210) eccB3 (TBMG 00288) - hypothetical protein [Mycobacterium tuberculosis str. KZN 1435]                  | 74.26 | 532 532 |
| fig 6666666.28482.peg.5715 | R018377 | (gi:15607424) eccB3 (Rv0283) - hypothetical protein [Mycobacterium tuberculosis str. H37Rv]                          | 74.26 | 532 532 |
| fig 6666666.28482.peg.5715 | R018378 | (gi:148660049) eccB3 (MRA 0292) - hypothetical protein [Mycobacterium tuberculosis str. H37Ra]                       | 74.26 | 532 532 |
| fig 6666666.28482.peg.5715 | R018376 | (gi:148821481) eccB3 (TBFG 10290) - hypothetical protein [Mycobacterium tuberculosis str. F11]                       | 74.26 | 532 532 |
| fig 6666666.28482.peg.5715 | R018379 | (gi:15839669) eccB3 (MT0296) - hypothetical protein [Mycobacterium tuberculosis str. CDC1551]                        | 74.26 | 532 532 |
| fig 6666666.28482.peg.5715 | R019679 | (gi:224988671) eccB3 (JTY 0293) - hypothetical protein [Mycobacterium bovis str. BCG str. Tokyo 172]                 | 74.26 | 532 532 |
| fig 6666666.28482.peg.5715 | R018381 | (gi:121636198) eccB3 (BCG 0323) - hypothetical protein [Mycobacterium bovis str. BCG Pasteur 1173P2]                 | 74.26 | 532 532 |
| fig 6666666.28482.peg.5715 | R018380 | (gi:31791462) eccB3 (Mb0291) - hypothetical protein [Mycobacterium bovis str. AF2122/97]                             | 74.26 | 532 532 |
| fig 6666666.28482.peg.5715 | R019676 | (gi:339630358) eccB3 (MAF 02850) - putative conserved membrane protein [Mycobacterium africanum str. GM041182]       | 74.26 | 532 532 |
| fig 6666666.28482.peg.5715 | R018383 | (gi:118463197) eccB3 (MAV 4870) - hypothetical protein [Mycobacterium avium str. 104]                                | 76.74 | 519 532 |
| fig 6666666.28482.peg.5715 | R018384 | (gi:15828367) eccB3 (ML2536) - hypothetical protein [Mycobacterium leprae str. TN]                                   | 71.69 | 529 532 |
| fig 6666666.28482.peg.5715 | R019680 | (gi:221230844) eccB3 (MLBr 02536) - hypothetical protein [Mycobacterium leprae str. Br4923]                          | 71.69 | 529 532 |



|                            |         |                                                                                                                |       |      |      |
|----------------------------|---------|----------------------------------------------------------------------------------------------------------------|-------|------|------|
| fig 6666666.28482.peg.5715 | R019681 | (gi:333988931) eccB3 (JDM601 0291) - hypothetical protein [Mycobacterium sp. str. JDM601]                      | 66.79 | 513  | 532  |
| fig 6666666.28482.peg.5715 | R018386 | (gi:118473477) eccB3 (MSMEG 0616) - hypothetical protein [Mycobacterium smegmatis str. MC2 155]                | 66.93 | 508  | 532  |
| fig 6666666.28482.peg.5715 | R018388 | (gi:120401437) eccB3 (Mvan 0412) - hypothetical protein [Mycobacterium vanbaalenii str. PYR-1]                 | 65.95 | 508  | 532  |
| fig 6666666.28482.peg.5715 | R018389 | (gi:126432973) eccB3 (Mjls 0360) - hypothetical protein [Mycobacterium sp. str. JLS]                           | 68.04 | 508  | 532  |
| fig 6666666.28482.peg.5715 | R018391 | (gi:108797351) eccB3 (Mmcs 0371) - hypothetical protein [Mycobacterium sp. str. MCS]                           | 68.04 | 508  | 532  |
| fig 6666666.28482.peg.5715 | R018390 | (gi:119866436) eccB3 (Mkms 0381) - hypothetical protein [Mycobacterium sp. str. KMS]                           | 68.04 | 508  | 532  |
| fig 6666666.28482.peg.5715 | R018387 | (gi:145220932) eccB3 (Mflv 0328) - hypothetical protein [Mycobacterium gilvum str. PYR-GCK]                    | 61.6  | 510  | 532  |
| fig 6666666.28482.peg.5716 | R018398 | (gi:41409878) eccC3 (MAP3780) - hypothetical protein [Mycobacterium avium str. K-10 (subsp. paratuberculosis)] | 87.91 | 1324 | 1326 |
| fig 6666666.28482.peg.5716 | R019685 | (gi:340625322) eccC3 (MCAN 02931) - hypothetical protein [Mycobacterium canettii str. CIPT 140010059]          | 86.41 | 1326 | 1326 |
| fig 6666666.28482.peg.5716 | R019687 | (gi:224988672) eccC3 (JTY 0294) - hypothetical protein [Mycobacterium bovis str. BCG str. Tokyo 172]           | 86.34 | 1326 | 1326 |
| fig 6666666.28482.peg.5716 | R018397 | (gi:121636199) eccC3 (BCG 0324) - hypothetical protein [Mycobacterium bovis str. BCG Pasteur 1173P2]           | 86.34 | 1326 | 1326 |
| fig 6666666.28482.peg.5716 | R019686 | (gi:253797211) eccC3 (TBMG 00289) - hypothetical protein [Mycobacterium tuberculosis str. KZN 1435]            | 86.26 | 1326 | 1326 |
| fig 6666666.28482.peg.5716 | R018392 | (gi:148821482) eccC3 (TBFG 10291) - hypothetical protein [Mycobacterium tuberculosis str. F11]                 | 86.26 | 1326 | 1326 |
| fig 6666666.28482.peg.5716 | R018395 | (gi:15839670) eccC3 (MT0297) - FtsK/SpoIIIE family protein [Mycobacterium tuberculosis str. CDC1551]           | 86.26 | 1326 | 1326 |
| fig 6666666.28482.peg.5716 | R018396 | (gi:31791463) eccC3 (Mb0292) - hypothetical protein [Mycobacterium bovis str. AF2122/97]                       | 86.26 | 1326 | 1326 |
| fig 6666666.28482.peg.5716 | R019684 | (gi:339630359) eccC3 (MAF 02860) - putative conserved membrane protein [Mycobacterium africanum str. GM041182] | 86.26 | 1326 | 1326 |

|                            |         |                                                                                                                   |       |      |      |
|----------------------------|---------|-------------------------------------------------------------------------------------------------------------------|-------|------|------|
| fig 6666666.28482.peg.5716 | R018393 | (gi:15607425) eccC3 (Rv0284) - hypothetical protein [Mycobacterium tuberculosis str. H37Rv]                       | 86.19 | 1326 | 1326 |
| fig 6666666.28482.peg.5716 | R018394 | (gi:148660050) eccC3 (MRA 0293) - hypothetical protein [Mycobacterium tuberculosis str. H37Ra]                    | 86.19 | 1326 | 1326 |
| fig 6666666.28482.peg.5716 | R019682 | (gi:183980571) eccC3 (MMAR 0543) - hypothetical protein [Mycobacterium marinum str. M]                            | 85.04 | 1326 | 1326 |
| fig 6666666.28482.peg.5716 | R018399 | (gi:15828366) eccC3 (ML2535) - hypothetical protein [Mycobacterium leprae str. TN]                                | 85.2  | 1315 | 1326 |
| fig 6666666.28482.peg.5716 | R019688 | (gi:221230843) eccC3 (MLBr 02535) - hypothetical protein [Mycobacterium leprae str. Br4923]                       | 85.2  | 1315 | 1326 |
| fig 6666666.28482.peg.5716 | R018400 | (gi:118616920) eccC3 (MUL 1206) - hypothetical protein [Mycobacterium ulcerans str. Agy99]                        | 84.82 | 1326 | 1326 |
| fig 6666666.28482.peg.5716 | R019689 | (gi:333988932) eccC3 (JDM601 0292) - hypothetical protein [Mycobacterium sp. str. JDM601]                         | 80.06 | 1315 | 1326 |
| fig 6666666.28482.peg.5716 | R018406 | (gi:108797352) eccC3 (Mmcs 0372) - cell divisionFtsK/SpoIIIE [Mycobacterium sp. str. MCS]                         | 79.05 | 1326 | 1326 |
| fig 6666666.28482.peg.5716 | R018405 | (gi:119866437) eccC3 (Mkms 0382) - cell divisionFtsK/SpoIIIE [Mycobacterium sp. str. KMS]                         | 79.05 | 1326 | 1326 |
| fig 6666666.28482.peg.5716 | R018404 | (gi:126432974) eccC3 (Mjls 0361) - cell divisionFtsK/SpoIIIE [Mycobacterium sp. str. JLS]                         | 79.05 | 1326 | 1326 |
| fig 6666666.28482.peg.5716 | R018401 | (gi:118468237) eccC3 (MSMEG 0617) - ftsk/SpoIIIE family protein [Mycobacterium smegmatis str. MC2 155]            | 78.13 | 1317 | 1326 |
| fig 6666666.28482.peg.5716 | R018402 | (gi:145220931) eccC3 (Mflv 0327) - cell divisionFtsK/SpoIIIE [Mycobacterium gilvum str. PYR-GCK]                  | 76.09 | 1315 | 1326 |
| fig 6666666.28482.peg.5716 | R019683 | (gi:169629318) eccC3 (MAB 2232c) - putative FtsK/SpoIIIE family protein [Mycobacterium abscessus str. ATCC 19977] | 73.59 | 1319 | 1326 |
| fig 6666666.28482.peg.5716 | R018403 | (gi:120401438) eccC3 (Mvan 0413) - cell divisionFtsK/SpoIIIE [Mycobacterium vanbaalenii str. PYR-1]               | 75.51 | 1316 | 1326 |
| fig 6666666.28482.peg.5717 | R018414 | (gi:118467190) PE5 (MAV 4868) - PE family protein [Mycobacterium avium str. 104]                                  | 92.08 | 101  | 102  |
| fig 6666666.28482.peg.5717 | R018415 | (gi:15828365) PE5 (ML2534) - PE-family protein [Mycobacterium leprae str. TN]                                     | 76.77 | 99   | 102  |

|                            |         |                                                                                                              |       |     |     |
|----------------------------|---------|--------------------------------------------------------------------------------------------------------------|-------|-----|-----|
| fig 6666666.28482.peg.5717 | R019696 | (gi:221230842) PE5 (MLBr 02534) - PE-family protein [Mycobacterium leprae str. Br4923]                       | 76.77 | 99  | 102 |
| fig 6666666.28482.peg.5717 | R018413 | (gi:41409879) PE5 (MAP3781) - hypothetical protein [Mycobacterium avium str. K-10 (subsp. paratuberculosis)] | 91.09 | 101 | 102 |
| fig 6666666.28482.peg.5717 | R019694 | (gi:253797212) PE5 (TBMG 00290) - PE family protein [Mycobacterium tuberculosis str. KZN 1435]               | 90.2  | 102 | 102 |
| fig 6666666.28482.peg.5717 | R018408 | (gi:57116715) PE5 (Rv0285) - PE family protein [Mycobacterium tuberculosis str. H37Rv]                       | 90.2  | 102 | 102 |
| fig 6666666.28482.peg.5717 | R018409 | (gi:148660051) PE5 (MRA 0294) - PE family protein [Mycobacterium tuberculosis str. H37Ra]                    | 90.2  | 102 | 102 |
| fig 6666666.28482.peg.5717 | R018407 | (gi:148821483) PE5 (TBFG 10292) - PE family protein [Mycobacterium tuberculosis str. F11]                    | 90.2  | 102 | 102 |
| fig 6666666.28482.peg.5717 | R018410 | (gi:15839671) PE5 (MT0298) - PE family protein [Mycobacterium tuberculosis str. CDC1551]                     | 90.2  | 102 | 102 |
| fig 6666666.28482.peg.5717 | R019693 | (gi:340625323) PE5 (MCAN 02941) - PE family protein [Mycobacterium canettii str. CIPT 140010059]             | 90.2  | 102 | 102 |
| fig 6666666.28482.peg.5717 | R019695 | (gi:224988673) PE5 (JTY 0295) - PE family protein [Mycobacterium bovis str. BCG str. Tokyo 172]              | 90.2  | 102 | 102 |
| fig 6666666.28482.peg.5717 | R018412 | (gi:121636200) PE5 (BCG 0325) - PE family protein [Mycobacterium bovis str. BCG Pasteur 1173P2]              | 90.2  | 102 | 102 |
| fig 6666666.28482.peg.5717 | R018411 | (gi:31791464) PE5 (Mb0293) - PE family protein [Mycobacterium bovis str. AF2122/97]                          | 90.2  | 102 | 102 |
| fig 6666666.28482.peg.5717 | R019692 | (gi:339630360) PE5 (MAF 02870) - PE family protein [Mycobacterium africanum str. GM041182]                   | 90.2  | 102 | 102 |
| fig 6666666.28482.peg.5717 | R018416 | (gi:118616921) PE5 (MUL 1207) - PE family protein [Mycobacterium ulcerans str. Agy99]                        | 86.14 | 101 | 102 |
| fig 6666666.28482.peg.5717 | R019690 | (gi:183980572) PE5 (MMAR 0544) - PE family protein, PE5 [Mycobacterium marinum str. M]                       | 86.14 | 101 | 102 |
| fig 6666666.28482.peg.5717 | R018418 | (gi:145220930) PE5 (Mflv 0326) - PE domain-containing protein [Mycobacterium gilvum str. PYR-GCK]            | 74.51 | 102 | 102 |
| fig 6666666.28482.peg.5717 | R018422 | (gi:108797353) PE5 (Mmcs 0373) - PE-like protein [Mycobacterium sp. str. MCS]                                | 74.51 | 102 | 102 |

|                            |         |                                                                                                                                          |       |     |     |
|----------------------------|---------|------------------------------------------------------------------------------------------------------------------------------------------|-------|-----|-----|
| fig 6666666.28482.peg.5717 | R018421 | (gi:119866438) PE5 (Mkms 0383) - PE domain-containing protein [Mycobacterium sp. str. KMS]                                               | 74.51 | 102 | 102 |
| fig 6666666.28482.peg.5717 | R018420 | (gi:126432975) PE5 (Mjls 0362) - PE domain-containing protein [Mycobacterium sp. str. JLS]                                               | 74.51 | 102 | 102 |
| fig 6666666.28482.peg.5717 | R018417 | (gi:118470806) PE5 (MSMEG 0618) - PE family protein [Mycobacterium smegmatis str. MC2 155]                                               | 76.47 | 102 | 102 |
| fig 6666666.28482.peg.5717 | R019691 | (gi:169629317) PE5 (MAB 2231c) - PE family protein [Mycobacterium abscessus str. ATCC 19977]                                             | 76.47 | 102 | 102 |
| fig 6666666.28482.peg.5717 | R019697 | (gi:333988933) PE5 (JDM601 0293) - PE family protein PE5 [Mycobacterium sp. str. JDM601]                                                 | 84.54 | 97  | 102 |
| fig 6666666.28482.peg.5717 | R018419 | (gi:120401439) PE5 (Mvan 0414) - PE domain-containing protein [Mycobacterium vanbaalenii str. PYR-1]                                     | 71.57 | 102 | 102 |
| fig 6666666.28482.peg.5812 | R005827 | (gi:41407622) mgtC (MAP1524) - MgtC [Mycobacterium avium str. K-10 (subsp. paratuberculosis)]                                            | 83.76 | 234 | 235 |
| fig 6666666.28482.peg.5812 | R005828 | (gi:118464815) mgtC (MAV 2903) - putative Mg <sup>2+</sup> transporter-C (MgtC) family protein [Mycobacterium avium str. 104]            | 83.76 | 234 | 235 |
| fig 6666666.28482.peg.5812 | R019020 | (gi:183982694) mgtC (MMAR 2687) - Mg <sup>2+</sup> transport p-type ATPase C MgtC [Mycobacterium marinum str. M]                         | 81.55 | 233 | 235 |
| fig 6666666.28482.peg.5812 | R019024 | (gi:253799145) mgtC (TBMG 02183) - Mg <sup>2+</sup> transport ATPase C mgtC [Mycobacterium tuberculosis str. KZN 1435]                   | 82.98 | 235 | 235 |
| fig 6666666.28482.peg.5812 | R005822 | (gi:15608948) mgtC (Rv1811) - POSSIBLE Mg <sup>2+</sup> TRANSPORT P-TYPE ATPASE C MGTC [Mycobacterium tuberculosis str. H37Rv]           | 82.98 | 235 | 235 |
| fig 6666666.28482.peg.5812 | R005823 | (gi:148661617) mgtC (MRA 1823) - Mg <sup>2+</sup> transport P-type ATPase C [Mycobacterium tuberculosis str. H37Ra]                      | 82.98 | 235 | 235 |
| fig 6666666.28482.peg.5812 | R013458 | (gi:148823024) mgtC (TBFM 11841) - Mg <sup>2+</sup> transport P-type ATPase C mgtC [Mycobacterium tuberculosis str. F11]                 | 82.98 | 235 | 235 |
| fig 6666666.28482.peg.5812 | R005824 | (gi:15841281) mgtC (MT1859) - Mg <sup>2+</sup> transport protein [Mycobacterium tuberculosis str. CDC1551]                               | 82.98 | 235 | 235 |
| fig 6666666.28482.peg.5812 | R019023 | (gi:340626820) mgtC (MCAN 18271) - putative Mg <sup>2+</sup> transport P-type ATPase C MGTC [Mycobacterium canettii str. CIPT 140010059] | 82.98 | 235 | 235 |
| fig 6666666.28482.peg.5812 | R019025 | (gi:224990197) mgtC (JTY 1829) - putative Mg <sup>2+</sup> transport P-type ATPase C [Mycobacterium bovis str. BCG str. Tokyo 172]       | 82.98 | 235 | 235 |

|                            |         |                                                                                                                                         |       |     |     |
|----------------------------|---------|-----------------------------------------------------------------------------------------------------------------------------------------|-------|-----|-----|
| fig 6666666.28482.peg.5812 | R005826 | (gi:121637713) mgtC (BCG 1845) - putative Mg <sup>2+</sup> transport P-type atpase C mgtC [Mycobacterium bovis str. BCG Pasteur 1173P2] | 82.98 | 235 | 235 |
| fig 6666666.28482.peg.5812 | R005825 | (gi:31793000) mgtC (Mb1841) - POSSIBLE Mg <sup>2+</sup> TRANSPORT P-TYPE ATPASE C MGTC [Mycobacterium bovis str. AF2122/97]             | 82.98 | 235 | 235 |
| fig 6666666.28482.peg.5812 | R005829 | (gi:118618454) mgtC (MUL 3069) - Mg <sup>2+</sup> transport p-type ATPase C MgtC [Mycobacterium ulcerans str. Agy99]                    | 80.69 | 233 | 235 |
| fig 6666666.28482.peg.5812 | R019022 | (gi:339631864) mgtC (MAF 18330) - putative Mg <sup>2+</sup> transport P-type ATPase C MGTC [Mycobacterium africanum str. GM041182]      | 82.55 | 235 | 235 |
| fig 6666666.28482.peg.5812 | R019026 | (gi:333990549) mgtC (JDM601 1909) - Mg <sup>2+</sup> transport p-type ATPase C MgtC [Mycobacterium sp. str. JDM601]                     | 75.86 | 232 | 235 |
| fig 6666666.28482.peg.5819 | R019885 | (gi:253799160) eccA5 (TBMG 02198) - hypothetical protein [Mycobacterium tuberculosis str. KZN 1435]                                     | 90.07 | 592 | 595 |
| fig 6666666.28482.peg.5819 | R013980 | (gi:15608935) eccA5 (Rv1798) - hypothetical protein [Mycobacterium tuberculosis str. H37Rv]                                             | 90.07 | 592 | 595 |
| fig 6666666.28482.peg.5819 | R013981 | (gi:148661604) eccA5 (MRA 1811) - hypothetical protein [Mycobacterium tuberculosis str. H37Ra]                                          | 90.07 | 592 | 595 |
| fig 6666666.28482.peg.5819 | R013979 | (gi:148823012) eccA5 (TBFG 11829) - hypothetical protein [Mycobacterium tuberculosis str. F11]                                          | 90.07 | 592 | 595 |
| fig 6666666.28482.peg.5819 | R013982 | (gi:15841267) eccA5 (MT1847) - hypothetical protein [Mycobacterium tuberculosis str. CDC1551]                                           | 90.07 | 592 | 595 |
| fig 6666666.28482.peg.5819 | R019884 | (gi:340626810) eccA5 (MCAN 18161) - hypothetical protein [Mycobacterium canettii str. CIPT 140010059]                                   | 90.07 | 592 | 595 |
| fig 6666666.28482.peg.5819 | R019886 | (gi:224990183) eccA5 (JTY 1814) - hypothetical protein [Mycobacterium bovis str. BCG str. Tokyo 172]                                    | 90.07 | 592 | 595 |
| fig 6666666.28482.peg.5819 | R013984 | (gi:121637699) eccA5 (BCG 1830) - hypothetical protein [Mycobacterium bovis str. BCG Pasteur 1173P2]                                    | 90.07 | 592 | 595 |
| fig 6666666.28482.peg.5819 | R013983 | (gi:31792986) eccA5 (Mb1826) - hypothetical protein [Mycobacterium bovis str. AF2122/97]                                                | 90.07 | 592 | 595 |
| fig 6666666.28482.peg.5819 | R019883 | (gi:339631852) eccA5 (MAF 18200) - hypothetical protein [Mycobacterium africanum str. GM041182]                                         | 89.9  | 592 | 595 |
| fig 6666666.28482.peg.5819 | R013987 | (gi:15827806) eccA5 (ML1536) - hypothetical protein [Mycobacterium leprae str. TN]                                                      | 88.42 | 594 | 595 |

|                            |         |                                                                                                                |       |     |     |
|----------------------------|---------|----------------------------------------------------------------------------------------------------------------|-------|-----|-----|
| fig 6666666.28482.peg.5819 | R019887 | (gi:221230283) eccA5 (MLBr 01536) - hypothetical protein [Mycobacterium leprae str. Br4923]                    | 88.42 | 594 | 595 |
| fig 6666666.28482.peg.5819 | R013986 | (gi:118464185) eccA5 (MAV 2916) - ATPase AAA [Mycobacterium avium str. 104]                                    | 91.28 | 594 | 595 |
| fig 6666666.28482.peg.5819 | R019882 | (gi:183982687) eccA5 (MMAR 2680) - hypothetical protein [Mycobacterium marinum str. M]                         | 88.72 | 592 | 595 |
| fig 6666666.28482.peg.5819 | R013985 | (gi:41407611) eccA5 (MAP1513) - hypothetical protein [Mycobacterium avium str. K-10 (subsp. paratuberculosis)] | 91.11 | 594 | 595 |
| fig 6666666.28482.peg.5819 | R013988 | (gi:118618460) eccA5 (MUL 3077) - hypothetical protein [Mycobacterium ulcerans str. Agy99]                     | 88.22 | 592 | 595 |
| fig 6666666.28482.peg.5819 | R019888 | (gi:333990541) eccA5 (JDM601 1901) - hypothetical protein [Mycobacterium sp. str. JDM601]                      | 84.06 | 594 | 595 |
| fig 6666666.28482.peg.5820 | R013996 | (gi:118465331) eccE5 (MAV 2917) - hypothetical protein [Mycobacterium avium str. 104]                          | 76.37 | 401 | 401 |
| fig 6666666.28482.peg.5820 | R013995 | (gi:41407610) eccE5 (MAP1512) - hypothetical protein [Mycobacterium avium str. K-10 (subsp. paratuberculosis)] | 75.87 | 401 | 401 |
| fig 6666666.28482.peg.5820 | R019840 | (gi:183982686) eccE5 (MMAR 2679) - hypothetical protein [Mycobacterium marinum str. M]                         | 69.14 | 401 | 401 |
| fig 6666666.28482.peg.5820 | R013998 | (gi:118618461) eccE5 (MUL 3078) - hypothetical protein [Mycobacterium ulcerans str. Agy99]                     | 68.4  | 401 | 401 |
| fig 6666666.28482.peg.5820 | R019843 | (gi:253799161) eccE5 (TBMG 02199) - hypothetical protein [Mycobacterium tuberculosis str. KZN 1435]            | 71.57 | 401 | 401 |
| fig 6666666.28482.peg.5820 | R013990 | (gi:15608934) eccE5 (Rv1797) - hypothetical protein [Mycobacterium tuberculosis str. H37Rv]                    | 71.57 | 401 | 401 |
| fig 6666666.28482.peg.5820 | R013991 | (gi:148661603) eccE5 (MRA 1810) - hypothetical protein [Mycobacterium tuberculosis str. H37Ra]                 | 71.57 | 401 | 401 |
| fig 6666666.28482.peg.5820 | R013989 | (gi:148823011) eccE5 (TBF 11828) - hypothetical protein [Mycobacterium tuberculosis str. F11]                  | 71.57 | 401 | 401 |
| fig 6666666.28482.peg.5820 | R013992 | (gi:15841266) eccE5 (MT1846) - hypothetical protein [Mycobacterium tuberculosis str. CDC1551]                  | 71.57 | 401 | 401 |
| fig 6666666.28482.peg.5820 | R019842 | (gi:340626809) eccE5 (MCAN 18151) - hypothetical protein [Mycobacterium canettii str. CIPT 140010059]          | 71.57 | 401 | 401 |

|                            |         |                                                                                                                                                                                                        |       |     |     |
|----------------------------|---------|--------------------------------------------------------------------------------------------------------------------------------------------------------------------------------------------------------|-------|-----|-----|
| fig 6666666.28482.peg.5820 | R019844 | (gi:224990182) eccE5 (JTY 1813) - hypothetical protein [Mycobacterium bovis str. BCG str. Tokyo 172]                                                                                                   | 71.57 | 401 | 401 |
| fig 6666666.28482.peg.5820 | R013994 | (gi:121637698) eccE5 (BCG 1829) - hypothetical protein [Mycobacterium bovis str. BCG Pasteur 1173P2]                                                                                                   | 71.57 | 401 | 401 |
| fig 6666666.28482.peg.5820 | R013993 | (gi:31792985) eccE5 (Mb1825) - hypothetical protein [Mycobacterium bovis str. AF2122/97]                                                                                                               | 71.57 | 401 | 401 |
| fig 6666666.28482.peg.5820 | R019841 | (gi:339631851) eccE5 (MAF 18190) - hypothetical protein [Mycobacterium africanum str. GM041182]                                                                                                        | 71.57 | 401 | 401 |
| fig 6666666.28482.peg.5820 | R013997 | (gi:15827807) eccE5 (ML1537) - possible secreted protein [Mycobacterium leprae str. TN]                                                                                                                | 69.06 | 401 | 401 |
| fig 6666666.28482.peg.5820 | R019845 | (gi:221230284) eccE5 (MLBr 01537) - putative secreted protein [Mycobacterium leprae str. Br4923]                                                                                                       | 69.06 | 401 | 401 |
| fig 6666666.28482.peg.5821 | R014005 | (gi:41407609) mycP5 (MAP1511) - hypothetical protein [Mycobacterium avium str. K-10 (subsp. paratuberculosis)]                                                                                         | 79.38 | 614 | 614 |
| fig 6666666.28482.peg.5821 | R014006 | (gi:118465602) mycP5 (MAV 2918) - subtilase family protein [Mycobacterium avium str. 104]                                                                                                              | 79.22 | 614 | 614 |
| fig 6666666.28482.peg.5821 | R014007 | (gi:15827808) mycP5 (ML1538) - possible protease [Mycobacterium leprae str. TN]                                                                                                                        | 73.37 | 592 | 614 |
| fig 6666666.28482.peg.5821 | R019838 | (gi:221230285) mycP5 (MLBr 01538) - putative protease [Mycobacterium leprae str. Br4923]                                                                                                               | 73.37 | 592 | 614 |
| fig 6666666.28482.peg.5821 | R014008 | (gi:118618462) mycP5 (MUL 3079) - proline rich membrane-anchored mycosin MycP5 [Mycobacterium ulcerans str. Agy99]                                                                                     | 74.15 | 614 | 614 |
| fig 6666666.28482.peg.5821 | R019833 | (gi:183982685) mycP5 (MMAR 2678) - proline rich membrane-anchored mycosin MycP5 [Mycobacterium marinum str. M]                                                                                         | 74.15 | 614 | 614 |
| fig 6666666.28482.peg.5821 | R019835 | (gi:340626808) mycP5 (MCAN 18141) - putative proline rich membrane-anchored myosin MYCP5 [Mycobacterium canettii str. CIPT 140010059]                                                                  | 71.75 | 614 | 614 |
| fig 6666666.28482.peg.5821 | R019836 | (gi:253799162) mycP5 (TBMG 02200) - hypothetical protein [Mycobacterium tuberculosis str. KZN 1435]                                                                                                    | 71.75 | 614 | 614 |
| fig 6666666.28482.peg.5821 | R014000 | (gi:15608933) mycP5 (Rv1796) - PROBABLE PROLINE RICH MEMBRANE-ANCHORED MYCOSIN MYCP5 (SERINE PROTEASE) (SUBTILISIN-LIKE PROTEASE) (SUBTILASE-LIKE) (MYCOSIN-5) [Mycobacterium tuberculosis str. H37Rv] | 71.75 | 614 | 614 |

|                            |         |                                                                                                                                                    |       |     |     |
|----------------------------|---------|----------------------------------------------------------------------------------------------------------------------------------------------------|-------|-----|-----|
| fig 6666666.28482.peg.5821 | R014001 | (gi:148661602) mycP5 (MRA 1809) - proline rich membrane-anchored mycosin MycP5 [Mycobacterium tuberculosis str. H37Ra]                             | 71.75 | 614 | 614 |
| fig 6666666.28482.peg.5821 | R014002 | (gi:15841265) mycP5 (MT1845) - serine protease [Mycobacterium tuberculosis str. CDC1551]                                                           | 71.75 | 614 | 614 |
| fig 6666666.28482.peg.5821 | R019837 | (gi:224990181) mycP5 (JTY 1812) - hypothetical pro-rich protease [Mycobacterium bovis str. BCG str. Tokyo 172]                                     | 71.75 | 614 | 614 |
| fig 6666666.28482.peg.5821 | R014004 | (gi:121637697) mycP5 (BCG 1828) - hypothetical pro-rich protease [Mycobacterium bovis str. BCG Pasteur 1173P2]                                     | 71.75 | 614 | 614 |
| fig 6666666.28482.peg.5821 | R014003 | (gi:31792984) mycP5 (Mb1824) - CONSERVED HYPOTHETICAL PRO-RICH PROTEASE [Mycobacterium bovis str. AF2122/97]                                       | 71.75 | 614 | 614 |
| fig 6666666.28482.peg.5821 | R019834 | (gi:339631850) mycP5 (MAF 18180) - putative proline rich membrane-anchored mycosin MYCP5 (Serine protease) [Mycobacterium africanum str. GM041182] | 71.75 | 614 | 614 |
| fig 6666666.28482.peg.5821 | R013999 | (gi:148823010) mycP5 (TBFG 11827) - proline rich membrane-anchored mycosin mycP5 [Mycobacterium tuberculosis str. F11]                             | 71.59 | 614 | 614 |
| fig 6666666.28482.peg.5822 | R019826 | (gi:183982684) eccD5 (MMAR 2677) - hypothetical protein [Mycobacterium marinum str. M]                                                             | 80.96 | 478 | 478 |
| fig 6666666.28482.peg.5822 | R014018 | (gi:118618463) eccD5 (MUL 3080) - hypothetical protein [Mycobacterium ulcerans str. Agy99]                                                         | 80.75 | 478 | 478 |
| fig 6666666.28482.peg.5822 | R014016 | (gi:118466119) eccD5 (MAV 2919) - secretion protein Snm4 [Mycobacterium avium str. 104]                                                            | 83.68 | 478 | 478 |
| fig 6666666.28482.peg.5822 | R014015 | (gi:41407608) eccD5 (MAP1510) - hypothetical protein [Mycobacterium avium str. K-10 (subsp. paratuberculosis)]                                     | 83.47 | 478 | 478 |
| fig 6666666.28482.peg.5822 | R019827 | (gi:339631849) eccD5 (MAF 18170) - hypothetical protein [Mycobacterium africanum str. GM041182]                                                    | 79.08 | 478 | 478 |
| fig 6666666.28482.peg.5822 | R014013 | (gi:31792983) eccD5 (Mb1823) - hypothetical protein [Mycobacterium bovis str. AF2122/97]                                                           | 79.5  | 478 | 478 |
| fig 6666666.28482.peg.5822 | R019830 | (gi:224990180) eccD5 (JTY 1811) - hypothetical membrane protein [Mycobacterium bovis str. BCG str. Tokyo 172]                                      | 79.29 | 478 | 478 |
| fig 6666666.28482.peg.5822 | R014014 | (gi:121637696) eccD5 (BCG 1827) - hypothetical membrane protein [Mycobacterium bovis str. BCG Pasteur 1173P2]                                      | 79.29 | 478 | 478 |
| fig 6666666.28482.peg.5822 | R019829 | (gi:253799163) eccD5 (TBMG 02201) - hypothetical protein [Mycobacterium tuberculosis str. KZN 1435]                                                | 79.29 | 478 | 478 |



|                            |         |                                                                                                       |       |     |     |
|----------------------------|---------|-------------------------------------------------------------------------------------------------------|-------|-----|-----|
| fig 6666666.28482.peg.5822 | R014010 | (gi:15608932) eccD5 (Rv1795) - hypothetical protein [Mycobacterium tuberculosis str. H37Rv]           | 79.29 | 478 | 478 |
| fig 6666666.28482.peg.5822 | R014011 | (gi:148661601) eccD5 (MRA 1808) - hypothetical protein [Mycobacterium tuberculosis str. H37Ra]        | 79.29 | 478 | 478 |
| fig 6666666.28482.peg.5822 | R014009 | (gi:148823009) eccD5 (TBF11826) - hypothetical protein [Mycobacterium tuberculosis str. F11]          | 79.29 | 478 | 478 |
| fig 6666666.28482.peg.5822 | R014012 | (gi:15841264) eccD5 (MT1844) - hypothetical protein [Mycobacterium tuberculosis str. CDC1551]         | 79.29 | 478 | 478 |
| fig 6666666.28482.peg.5822 | R019828 | (gi:340626807) eccD5 (MCAN 18131) - hypothetical protein [Mycobacterium canettii str. CIPT 140010059] | 79.29 | 478 | 478 |
| fig 6666666.28482.peg.5822 | R014017 | (gi:15827809) eccD5 (ML1539) - probable membrane protein [Mycobacterium leprae str. TN]               | 77.82 | 478 | 478 |
| fig 6666666.28482.peg.5822 | R019831 | (gi:221230286) eccD5 (MLBr 01539) - hypothetical protein [Mycobacterium leprae str. Br4923]           | 77.82 | 478 | 478 |
| fig 6666666.28482.peg.5822 | R019832 | (gi:333990538) eccD5 (JDM601 1898) - hypothetical protein [Mycobacterium sp. str. JDM601]             | 62.97 | 478 | 478 |
| fig 6666666.28482.peg.5823 | R019819 | (gi:183982683) MMAR2676 - hypothetical protein [Mycobacterium marinum str. M]                         | 95.67 | 300 | 300 |
| fig 6666666.28482.peg.5823 | R019822 | (gi:253799164) TBMG02202 - hypothetical protein [Mycobacterium tuberculosis str. KZN 1435]            | 95    | 300 | 300 |
| fig 6666666.28482.peg.5823 | R014020 | (gi:15608931) Rv1794 - hypothetical protein [Mycobacterium tuberculosis str. H37Rv]                   | 95    | 300 | 300 |
| fig 6666666.28482.peg.5823 | R014021 | (gi:148661600) MRA1807 - hypothetical protein [Mycobacterium tuberculosis str. H37Ra]                 | 95    | 300 | 300 |
| fig 6666666.28482.peg.5823 | R014019 | (gi:148823008) TBF11825 - hypothetical protein [Mycobacterium tuberculosis str. F11]                  | 95    | 300 | 300 |
| fig 6666666.28482.peg.5823 | R014022 | (gi:15841263) MT1843 - hypothetical protein [Mycobacterium tuberculosis str. CDC1551]                 | 95    | 300 | 300 |
| fig 6666666.28482.peg.5823 | R019821 | (gi:340626806) MCAN18121 - hypothetical protein [Mycobacterium canettii str. CIPT 140010059]          | 95    | 300 | 300 |
| fig 6666666.28482.peg.5823 | R019823 | (gi:224990179) JTY1810 - hypothetical protein [Mycobacterium bovis str. BCG str. Tokyo 172]           | 95    | 300 | 300 |

|                            |         |                                                                                                              |       |     |     |
|----------------------------|---------|--------------------------------------------------------------------------------------------------------------|-------|-----|-----|
| fig 6666666.28482.peg.5823 | R014024 | (gi:121637695) BCG1826 - hypothetical protein [Mycobacterium bovis str. BCG Pasteur 1173P2]                  | 95    | 300 | 300 |
| fig 6666666.28482.peg.5823 | R014023 | (gi:31792982) Mb1822 - hypothetical protein [Mycobacterium bovis str. AF2122/97]                             | 95    | 300 | 300 |
| fig 6666666.28482.peg.5823 | R019820 | (gi:339631848) MAF18160 - hypothetical protein [Mycobacterium africanum str. GM041182]                       | 95    | 300 | 300 |
| fig 6666666.28482.peg.5823 | R014028 | (gi:118618464) MUL3081 - hypothetical protein [Mycobacterium ulcerans str. Agy99]                            | 95.33 | 300 | 300 |
| fig 6666666.28482.peg.5823 | R014025 | (gi:41407607) MAP1509 - hypothetical protein [Mycobacterium avium str. K-10 (subsp. paratuberculosis)]       | 95    | 300 | 300 |
| fig 6666666.28482.peg.5823 | R014026 | (gi:118462612) MAV2920 - hypothetical protein [Mycobacterium avium str. 104]                                 | 95    | 300 | 300 |
| fig 6666666.28482.peg.5823 | R014027 | (gi:15827810) ML1540 - hypothetical protein [Mycobacterium leprae str. TN]                                   | 88.33 | 300 | 300 |
| fig 6666666.28482.peg.5823 | R019824 | (gi:221230287) MLBr01540 - hypothetical protein [Mycobacterium leprae str. Br4923]                           | 88.33 | 300 | 300 |
| fig 6666666.28482.peg.5823 | R019825 | (gi:333990537) JDM6011897 - hypothetical protein [Mycobacterium sp. str. JDM601]                             | 87.84 | 296 | 300 |
| fig 6666666.28482.peg.5826 | R006111 | (gi:118620032) sodA (MUL 5018) - superoxide dismutase [fe] SodA [Mycobacterium ulcerans str. Agy99]          | 92.27 | 207 | 224 |
| fig 6666666.28482.peg.5826 | R019192 | (gi:183985365) sodA (MMAR 5396) - superoxide dismutase [Fe] SodA [Mycobacterium marinum str. M]              | 92.27 | 207 | 224 |
| fig 6666666.28482.peg.5826 | R019196 | (gi:253800897) sodA (TBMG 03895) - superoxide dismutase [Fe] sodA [Mycobacterium tuberculosis str. KZN 1435] | 92.27 | 207 | 224 |
| fig 6666666.28482.peg.5826 | R006103 | (gi:15610982) sodA (Rv3846) - SUPEROXIDE DISMUTASE [FE] SODA [Mycobacterium tuberculosis str. H37Rv]         | 92.27 | 207 | 224 |
| fig 6666666.28482.peg.5826 | R006104 | (gi:148663714) sodA (MRA 3886) - superoxide dismutase [Mycobacterium tuberculosis str. H37Ra]                | 92.27 | 207 | 224 |
| fig 6666666.28482.peg.5826 | R013481 | (gi:148825055) sodA (TBF 13882) - superoxide dismutase [Fe] sodA [Mycobacterium tuberculosis str. F11]       | 92.27 | 207 | 224 |
| fig 6666666.28482.peg.5826 | R006105 | (gi:15843476) sodA (MT3960) - superoxide dismutase [Mycobacterium tuberculosis str. CDC1551]                 | 92.27 | 207 | 224 |

|                            |         |                                                                                                                |       |     |     |
|----------------------------|---------|----------------------------------------------------------------------------------------------------------------|-------|-----|-----|
| fig 6666666.28482.peg.5826 | R019195 | (gi:340628817) sodA (MCAN 38671) - superoxide dismutase [Fe] SODA [Mycobacterium canettii str. CIPT 140010059] | 92.27 | 207 | 224 |
| fig 6666666.28482.peg.5826 | R019194 | (gi:339633840) sodA (MAF 38610) - superoxide dismutase [FE] SODA [Mycobacterium africanum str. GM041182]       | 92.27 | 207 | 224 |
| fig 6666666.28482.peg.5826 | R019197 | (gi:224992259) sodA (JTY 3911) - Fe-superoxide dismutase [Mycobacterium bovis str. BCG str. Tokyo 172]         | 91.79 | 207 | 224 |
| fig 6666666.28482.peg.5826 | R006107 | (gi:121639764) sodA (BCG 3909) - Superoxide dismutase [fe] sodA [Mycobacterium bovis str. BCG Pasteur 1173P2]  | 91.79 | 207 | 224 |
| fig 6666666.28482.peg.5826 | R006106 | (gi:31795020) sodA (Mb3876) - SUPEROXIDE DISMUTASE [FE] SODA [Mycobacterium bovis str. AF2122/97]              | 91.79 | 207 | 224 |
| fig 6666666.28482.peg.5826 | R006109 | (gi:118464258) sodA (MAV 0182) - [Mn]-superoxide dismutase [Mycobacterium avium str. 104]                      | 82.13 | 207 | 224 |
| fig 6666666.28482.peg.5826 | R006108 | (gi:41406285) sodA (MAP0187c) - Soda [Mycobacterium avium str. K-10 (subsp. paratuberculosis)]                 | 81.64 | 207 | 224 |
| fig 6666666.28482.peg.5826 | R019193 | (gi:169627223) sodA (MAB 0118c) - superoxide dismutase (Mn) [Mycobacterium abscessus str. ATCC 19977]          | 81.16 | 207 | 224 |
| fig 6666666.28482.peg.5826 | R006112 | (gi:118469767) sodA (MSMEG 6427) - [Mn] superoxide dismutase [Mycobacterium smegmatis str. MC2 155]            | 80.19 | 207 | 224 |
| fig 6666666.28482.peg.5826 | R019199 | (gi:333992798) sodA (JDM601 4158) - superoxide dismutase [Mycobacterium sp. str. JDM601]                       | 81.95 | 205 | 224 |
| fig 6666666.28482.peg.5826 | R006115 | (gi:108802007) sodA (Mmcs 5044) - Superoxide dismutase [Mycobacterium sp. str. MCS]                            | 79.23 | 207 | 224 |
| fig 6666666.28482.peg.5826 | R006114 | (gi:119871159) sodA (Mkms 5132) - Superoxide dismutase [Mycobacterium sp. str. KMS]                            | 79.23 | 207 | 224 |
| fig 6666666.28482.peg.5826 | R006113 | (gi:126437986) sodA (Mjls 5423) - Superoxide dismutase [Mycobacterium sp. str. JLS]                            | 79.23 | 207 | 224 |
| fig 6666666.28482.peg.5826 | R006110 | (gi:15826917) sodA (ML0072) - superoxide dismutase [Mycobacterium leprae str. TN]                              | 79.51 | 205 | 224 |
| fig 6666666.28482.peg.5826 | R019198 | (gi:221229395) sodA (MLBr 00072) - superoxide dismutase [Mycobacterium leprae str. Br4923]                     | 79.51 | 205 | 224 |
| fig 6666666.28482.peg.5829 | R018259 | (gi:118473945) espR (MSMEG 6431) - hypothetical protein [Mycobacterium smegmatis str. MC2 155]                 | 84.89 | 139 | 160 |

|                            |         |                                                                                                                |       |     |     |
|----------------------------|---------|----------------------------------------------------------------------------------------------------------------|-------|-----|-----|
| fig 6666666.28482.peg.5829 | R018257 | (gi:15826914) espR (ML0069) - hypothetical protein [Mycobacterium leprae str. TN]                              | 89.31 | 131 | 160 |
| fig 6666666.28482.peg.5829 | R019596 | (gi:221229392) espR (MLBr 00069) - hypothetical protein [Mycobacterium leprae str. Br4923]                     | 89.31 | 131 | 160 |
| fig 6666666.28482.peg.5829 | R018258 | (gi:118620035) espR (MUL 5021) - hypothetical protein [Mycobacterium ulcerans str. Agy99]                      | 87.88 | 132 | 160 |
| fig 6666666.28482.peg.5829 | R019590 | (gi:183985368) espR (MMAR 5399) - hypothetical protein [Mycobacterium marinum str. M]                          | 87.88 | 132 | 160 |
| fig 6666666.28482.peg.5829 | R018255 | (gi:41406283) espR (MAP0185c) - hypothetical protein [Mycobacterium avium str. K-10 (subsp. paratuberculosis)] | 88.64 | 132 | 160 |
| fig 6666666.28482.peg.5829 | R018256 | (gi:118463431) espR (MAV 0180) - hypothetical protein [Mycobacterium avium str. 104]                           | 88.64 | 132 | 160 |
| fig 6666666.28482.peg.5829 | R018264 | (gi:108802010) espR (Mmcs 5047) - hypothetical protein [Mycobacterium sp. str. MCS]                            | 87.79 | 131 | 160 |
| fig 6666666.28482.peg.5829 | R018263 | (gi:119871162) espR (Mkms 5135) - hypothetical protein [Mycobacterium sp. str. KMS]                            | 87.79 | 131 | 160 |
| fig 6666666.28482.peg.5829 | R018262 | (gi:126437989) espR (Mjls 5426) - hypothetical protein [Mycobacterium sp. str. JLS]                            | 87.79 | 131 | 160 |
| fig 6666666.28482.peg.5829 | R019594 | (gi:253800900) espR (TBMG 03898) - hypothetical protein [Mycobacterium tuberculosis str. KZN 1435]             | 87.12 | 132 | 160 |
| fig 6666666.28482.peg.5829 | R018250 | (gi:15610985) espR (Rv3849) - hypothetical protein [Mycobacterium tuberculosis str. H37Rv]                     | 87.12 | 132 | 160 |
| fig 6666666.28482.peg.5829 | R018251 | (gi:148663717) espR (MRA 3889) - hypothetical protein [Mycobacterium tuberculosis str. H37Ra]                  | 87.12 | 132 | 160 |
| fig 6666666.28482.peg.5829 | R018249 | (gi:148825058) espR (TBFG 13885) - hypothetical protein [Mycobacterium tuberculosis str. F11]                  | 87.12 | 132 | 160 |
| fig 6666666.28482.peg.5829 | R019593 | (gi:340628821) espR (MCAN 38711) - hypothetical protein [Mycobacterium canettii str. CIPT 140010059]           | 87.12 | 132 | 160 |
| fig 6666666.28482.peg.5829 | R019595 | (gi:224992262) espR (JTY 3914) - hypothetical protein [Mycobacterium bovis str. BCG str. Tokyo 172]            | 87.12 | 132 | 160 |
| fig 6666666.28482.peg.5829 | R018254 | (gi:121639767) espR (BCG 3912) - hypothetical protein [Mycobacterium bovis str. BCG Pasteur 1173P2]            | 87.12 | 132 | 160 |

|                            |         |                                                                                                          |       |     |     |
|----------------------------|---------|----------------------------------------------------------------------------------------------------------|-------|-----|-----|
| fig 6666666.28482.peg.5829 | R018253 | (gi:31795023) espR (Mb3879) - hypothetical protein [Mycobacterium bovis str. AF2122/97]                  | 87.12 | 132 | 160 |
| fig 6666666.28482.peg.5829 | R019592 | (gi:339633843) espR (MAF 38640) - hypothetical protein [Mycobacterium africanum str. GM041182]           | 87.12 | 132 | 160 |
| fig 6666666.28482.peg.5829 | R018260 | (gi:145221725) espR (Mflv 1133) - hypothetical protein [Mycobacterium gilvum str. PYR-GCK]               | 85.5  | 131 | 160 |
| fig 6666666.28482.peg.5829 | R018252 | (gi:15843480) espR (MT3964) - hypothetical protein [Mycobacterium tuberculosis str. CDC1551]             | 86.36 | 132 | 160 |
| fig 6666666.28482.peg.5829 | R019597 | (gi:333992801) espR (JDM601 4161) - hypothetical protein [Mycobacterium sp. str. JDM601]                 | 83.33 | 132 | 160 |
| fig 6666666.28482.peg.5829 | R019591 | (gi:169627220) espR (MAB 0115c) - hypothetical protein [Mycobacterium abscessus str. ATCC 19977]         | 81.82 | 132 | 160 |
| fig 6666666.28482.peg.5865 | R012532 | (gi:42560712) tuf (MSC 0160) - translation elongation factor Tu [Mycoplasma mycoides str. PG1]           | 70.53 | 396 | 396 |
| fig 6666666.28482.peg.5865 | R012537 | (gi:83319675) tuf (MCAP 0154) - translation elongation factor Tu [Mycoplasma capricolum str. ATCC 27343] | 70.53 | 396 | 396 |
| fig 6666666.28482.peg.5865 | R012535 | (gi:71894677) tuf (MS53 0667) - Elongation factor Tu [Mycoplasma synoviae str. 53]                       | 70.03 | 396 | 396 |
| fig 6666666.28482.peg.5865 | R012533 | (gi:26553484) tuf (MYPE320) - elongation factor Tu [Mycoplasma penetrans str. HF-2]                      | 68.26 | 396 | 396 |
| fig 6666666.28482.peg.5865 | R012534 | (gi:15828876) tuf (MYPU 4050) - elongation factor Tu [Mycoplasma pulmonis str. UAB CTIP]                 | 67.59 | 396 | 396 |
| fig 6666666.28482.peg.5865 | R012527 | (gi:31544430) tuf (MGA 1033) - elongation factor Tu [Mycoplasma gallisepticum str. R]                    | 67.76 | 396 | 396 |
| fig 6666666.28482.peg.5865 | R012525 | (gi:13508404) tuf (MPN665) - elongation factor Tu [Mycoplasma pneumoniae str. M129]                      | 65.49 | 396 | 396 |
| fig 6666666.28482.peg.5865 | R012536 | (gi:148377586) tuf (MAG736) - Elongation factor Tu (EF-Tu) [Mycoplasma agalactiae str. PG2]              | 66.42 | 396 | 396 |
| fig 6666666.28482.peg.5865 | R012531 | (gi:47459059) tuf (MMOB2240) - elongation factor Tu [Mycoplasma mobile str. 163K]                        | 66.33 | 396 | 396 |
| fig 6666666.28482.peg.5865 | R012529 | (gi:72080854) tuf (MHP7448 0523) - elongation factor Tu [Mycoplasma hyopneumoniae str. 7448]             | 65.99 | 395 | 396 |

|                            |         |                                                                                                                                                                                |       |     |     |
|----------------------------|---------|--------------------------------------------------------------------------------------------------------------------------------------------------------------------------------|-------|-----|-----|
| fig 6666666.28482.peg.5865 | R012528 | (gi:54020567) tuf (mhp540) - elongation factor Tu [Mycoplasma hyopneumoniae str. 232]                                                                                          | 65.99 | 395 | 396 |
| fig 6666666.28482.peg.5865 | R012530 | (gi:71893875) tuf (MHJ 0524) - elongation factor Tu [Mycoplasma hyopneumoniae str. J]                                                                                          | 65.74 | 395 | 396 |
| fig 6666666.28482.peg.5865 | R012526 | (gi:12045310) tuf (MG 451) - elongation factor Tu [Mycoplasma genitalium str. G37]                                                                                             | 64.48 | 396 | 396 |
| fig 6666666.28482.peg.5887 | R019285 | (gi:340625993) mprA (MCAN 09861) - persistence regulator MRPA [Mycobacterium canettii str. CIPT 140010059]                                                                     | 96.96 | 230 | 230 |
| fig 6666666.28482.peg.5887 | R019287 | (gi:224989380) mprA (JTY 1008) - persistence regulator MprA [Mycobacterium bovis str. BCG str. Tokyo 172]                                                                      | 96.96 | 230 | 230 |
| fig 6666666.28482.peg.5887 | R006265 | (gi:121636908) mprA (BCG 1036) - Mycobacterial persistence regulator mrpA [Mycobacterium bovis str. BCG Pasteur 1173P2]                                                        | 96.96 | 230 | 230 |
| fig 6666666.28482.peg.5887 | R006264 | (gi:31792171) mprA (Mb1007) - MYCOBACTERIAL PERSISTENCE REGULATOR MRPA (TWO COMPONENT RESPONSE TRANSCRIPTIONAL REGULATORY PROTEIN) [Mycobacterium bovis str. AF2122/97]        | 96.96 | 230 | 230 |
| fig 6666666.28482.peg.5887 | R019284 | (gi:339631044) mprA (MAF 09910) - mycobacterial persistence regulator MRPA (two component response transcriptional regulatory protein) [Mycobacterium africanum str. GM041182] | 96.96 | 230 | 230 |
| fig 6666666.28482.peg.5887 | R006266 | (gi:41407014) mprA (MAP0916) - hypothetical protein [Mycobacterium avium str. K-10 (subsp. paratuberculosis)]                                                                  | 97.81 | 228 | 230 |
| fig 6666666.28482.peg.5887 | R006267 | (gi:118464125) mprA (MAV 1094) - mycobacterial persistence regulator mrpa [Mycobacterium avium str. 104]                                                                       | 97.81 | 228 | 230 |
| fig 6666666.28482.peg.5887 | R019286 | (gi:253799991) mprA (TBMG 03008) - persistence regulator MprA [Mycobacterium tuberculosis str. KZN 1435]                                                                       | 96.52 | 230 | 230 |
| fig 6666666.28482.peg.5887 | R006261 | (gi:15608121) mprA (Rv0981) - MYCOBACTERIAL PERSISTENCE REGULATOR MRPA (TWO COMPONENT RESPONSE TRANSCRIPTIONAL REGULATORY PROTEIN) [Mycobacterium tuberculosis str. H37Rv]     | 96.52 | 230 | 230 |
| fig 6666666.28482.peg.5887 | R006262 | (gi:148660762) mprA (MRA 0988) - mycobacterial persistence regulator MrpA [Mycobacterium tuberculosis str. H37Ra]                                                              | 96.52 | 230 | 230 |
| fig 6666666.28482.peg.5887 | R013507 | (gi:148822190) mprA (TBFG 10999) - mycobacterial persistence regulator mrpA (two component response transcriptional regulatory protein) [Mycobacterium tuberculosis str. F11]  | 96.52 | 230 | 230 |

|                            |         |                                                                                                                                           |       |     |     |
|----------------------------|---------|-------------------------------------------------------------------------------------------------------------------------------------------|-------|-----|-----|
| fig 6666666.28482.peg.5887 | R006263 | (gi:15840406) mprA (MT1009) - DNA-binding response regulator [Mycobacterium tuberculosis str. CDC1551]                                    | 96.52 | 230 | 230 |
| fig 6666666.28482.peg.5887 | R019282 | (gi:183984499) mprA (MMAR 4529) - two component response transcriptional regulatory protein MprA [Mycobacterium marinum str. M]           | 95.69 | 230 | 230 |
| fig 6666666.28482.peg.5887 | R006269 | (gi:118619772) mprA (MUL 4701) - mycobacterial persistence regulator MprA [Mycobacterium ulcerans str. Agy99]                             | 95.26 | 230 | 230 |
| fig 6666666.28482.peg.5887 | R006268 | (gi:15826987) mprA (ML0174) - putative two-component response regulator [Mycobacterium leprae str. TN]                                    | 94.74 | 228 | 230 |
| fig 6666666.28482.peg.5887 | R019288 | (gi:221229465) mprA (MLBr 00174) - putative two-component response regulator [Mycobacterium leprae str. Br4923]                           | 94.74 | 228 | 230 |
| fig 6666666.28482.peg.5887 | R006272 | (gi:120405794) mprA (Mvan 4844) - two component transcriptional regulator, winged helix family [Mycobacterium vanbaalenii str. PYR-1]     | 94.37 | 230 | 230 |
| fig 6666666.28482.peg.5887 | R006270 | (gi:118473019) mprA (MSMEG 5488) - DNA-binding response regulator [Mycobacterium smegmatis str. MC2 155]                                  | 91.74 | 230 | 230 |
| fig 6666666.28482.peg.5887 | R006275 | (gi:108801265) mprA (Mmcs 4301) - two component transcriptional regulator, winged helix family [Mycobacterium sp. str. MCS]               | 91.74 | 230 | 230 |
| fig 6666666.28482.peg.5887 | R006274 | (gi:119870416) mprA (Mkms 4387) - two component transcriptional regulator, winged helix family [Mycobacterium sp. str. KMS]               | 91.74 | 230 | 230 |
| fig 6666666.28482.peg.5887 | R006273 | (gi:126437246) mprA (Mjls 4681) - two component transcriptional regulator, winged helix family [Mycobacterium sp. str. JLS]               | 91.74 | 230 | 230 |
| fig 6666666.28482.peg.5887 | R006271 | (gi:145222477) mprA (Mflv 1887) - two component transcriptional regulator, winged helix family [Mycobacterium gilvum str. PYR-GCK]        | 92.64 | 230 | 230 |
| fig 6666666.28482.peg.5887 | R019289 | (gi:333989572) mprA (JDM601 0932) - two component response transcriptional regulatory protein MprA [Mycobacterium sp. str. JDM601]        | 89.57 | 230 | 230 |
| fig 6666666.28482.peg.5887 | R019283 | (gi:169628171) mprA (MAB 1076) - two component response transcriptional regulatory protein MprA [Mycobacterium abscessus str. ATCC 19977] | 88.26 | 230 | 230 |
| fig 6666666.28482.peg.5888 | R006283 | (gi:15826988) mprB (ML0175) - putative two-component system sensor kinase [Mycobacterium leprae str. TN]                                  | 85.14 | 524 | 524 |
| fig 6666666.28482.peg.5888 | R019296 | (gi:221229466) mprB (MLBr 00175) - putative two-component system sensor kinase [Mycobacterium leprae str. Br4923]                         | 85.14 | 524 | 524 |
| fig 6666666.28482.peg.5888 | R006281 | (gi:41407015) mprB (MAP0917) - hypothetical protein [Mycobacterium avium str. K-10 (subsp. paratuberculosis)]                             | 85.33 | 516 | 524 |

|                            |         |                                                                                                                              |       |     |     |
|----------------------------|---------|------------------------------------------------------------------------------------------------------------------------------|-------|-----|-----|
| fig 6666666.28482.peg.5888 | R006284 | (gi:118619771) mprB (MUL 4700) - two component sensor kinase MprB [Mycobacterium ulcerans str. Agy99]                        | 84.73 | 524 | 524 |
| fig 6666666.28482.peg.5888 | R019290 | (gi:183984498) mprB (MMAR 4528) - two-component sensor kinase MprB [Mycobacterium marinum str. M]                            | 84.73 | 524 | 524 |
| fig 6666666.28482.peg.5888 | R006282 | (gi:118464607) mprB (MAV 1095) - sensor histidine kinase [Mycobacterium avium str. 104]                                      | 85.49 | 501 | 524 |
| fig 6666666.28482.peg.5888 | R019293 | (gi:340625994) mprB (MCAN 09871) - putative two component sensor kinase MPRB [Mycobacterium canettii str. CIPT 140010059]    | 83.17 | 523 | 524 |
| fig 6666666.28482.peg.5888 | R019295 | (gi:224989381) mprB (JTY 1009) - putative two component sensor kinase [Mycobacterium bovis str. BCG str. Tokyo 172]          | 83.17 | 523 | 524 |
| fig 6666666.28482.peg.5888 | R006280 | (gi:121636909) mprB (BCG 1037) - putative two component sensor kinase mprB [Mycobacterium bovis str. BCG Pasteur 1173P2]     | 83.17 | 523 | 524 |
| fig 6666666.28482.peg.5888 | R006279 | (gi:31792172) mprB (Mb1008) - PROBABLE TWO COMPONENT SENSOR KINASE MPRB [Mycobacterium bovis str. AF2122/97]                 | 83.17 | 523 | 524 |
| fig 6666666.28482.peg.5888 | R019292 | (gi:339631045) mprB (MAF 09920) - putative two component sensor kinase MPRB [Mycobacterium africanum str. GM041182]          | 83.17 | 523 | 524 |
| fig 6666666.28482.peg.5888 | R019294 | (gi:253799990) mprB (TBMG 03007) - two component system sensor kinase mprB [Mycobacterium tuberculosis str. KZN 1435]        | 83.17 | 523 | 524 |
| fig 6666666.28482.peg.5888 | R006276 | (gi:15608122) mprB (Rv0982) - PROBABLE TWO COMPONENT SENSOR KINASE MPRB [Mycobacterium tuberculosis str. H37Rv]              | 83.17 | 523 | 524 |
| fig 6666666.28482.peg.5888 | R006277 | (gi:148660763) mprB (MRA 0989) - putative two component sensor kinase MprB [Mycobacterium tuberculosis str. H37Ra]           | 83.17 | 523 | 524 |
| fig 6666666.28482.peg.5888 | R013508 | (gi:148822191) mprB (TBFG 11000) - two component system sensor kinase mprB [Mycobacterium tuberculosis str. F11]             | 83.17 | 523 | 524 |
| fig 6666666.28482.peg.5888 | R006278 | (gi:15840407) mprB (MT1010) - sensor histidine kinase [Mycobacterium tuberculosis str. CDC1551]                              | 83.17 | 523 | 524 |
| fig 6666666.28482.peg.5888 | R006288 | (gi:126437245) mprB (Mjls 4680) - integral membrane sensor signal transduction histidine kinase [Mycobacterium sp. str. JLS] | 82.97 | 464 | 524 |
| fig 6666666.28482.peg.5888 | R006290 | (gi:108801264) mprB (Mmcs 4300) - periplasmic sensor signal transduction histidine kinase [Mycobacterium sp. str. MCS]       | 83.59 | 457 | 524 |
| fig 6666666.28482.peg.5888 | R006289 | (gi:119870415) mprB (Mkms 4386) - integral membrane sensor signal transduction histidine kinase [Mycobacterium sp. str. KMS] | 83.59 | 457 | 524 |



|                            |         |                                                                                                                                        |       |     |     |
|----------------------------|---------|----------------------------------------------------------------------------------------------------------------------------------------|-------|-----|-----|
| fig 6666666.28482.peg.5888 | R006287 | (gi:120405793) mprB (Mvan 4843) - integral membrane sensor signal transduction histidine kinase [Mycobacterium vanbaalenii str. PYR-1] | 75.94 | 453 | 524 |
| fig 6666666.28482.peg.5888 | R006286 | (gi:145222478) mprB (Mflv 1888) - integral membrane sensor signal transduction histidine kinase [Mycobacterium gilvum str. PYR-GCK]    | 75.61 | 451 | 524 |
| fig 6666666.28482.peg.5888 | R019297 | (gi:333989573) mprB (JDM601 0933) - two-component sensor kinase MprB [Mycobacterium sp. str. JDM601]                                   | 77.68 | 468 | 524 |
| fig 6666666.28482.peg.5888 | R006285 | (gi:118473327) mprB (MSMEG 5487) - sensor histidine kinase [Mycobacterium smegmatis str. MC2 155]                                      | 78.49 | 465 | 524 |
| fig 6666666.28482.peg.5888 | R019291 | (gi:169628172) mprB (MAB 1077) - two component sensor kinase MprB [Mycobacterium abscessus str. ATCC 19977]                            | 65.3  | 522 | 524 |
| fig 6666666.28482.peg.5910 | R018659 | (gi:118618471) PE18 (MUL 3088) - PE family protein [Mycobacterium ulcerans str. Agy99]                                                 | 65.52 | 87  | 99  |
| fig 6666666.28482.peg.5910 | R019862 | (gi:183982677) PE18 (MMAR 2670) - PE family protein, PE19 1 [Mycobacterium marinum str. M]                                             | 65.52 | 87  | 99  |
| fig 6666666.28482.peg.5910 | R019877 | (gi:183982680) PE19 (MMAR 2673) - PE family protein, PE19 [Mycobacterium marinum str. M]                                               | 71.26 | 87  | 99  |
| fig 6666666.28482.peg.5910 | R019865 | (gi:253799172) PE18 (TBMG 02209) - PE family protein [Mycobacterium tuberculosis str. KZN 1435]                                        | 68.97 | 87  | 99  |
| fig 6666666.28482.peg.5910 | R018654 | (gi:57116910) PE18 (Rv1788) - PE family protein [Mycobacterium tuberculosis str. H37Rv]                                                | 68.97 | 87  | 99  |
| fig 6666666.28482.peg.5910 | R018655 | (gi:148661595) PE18 (MRA 1802) - PE family protein [Mycobacterium tuberculosis str. H37Ra]                                             | 68.97 | 87  | 99  |
| fig 6666666.28482.peg.5910 | R018653 | (gi:148823003) PE18 (TBFG 11818) - PE family protein [Mycobacterium tuberculosis str. F11]                                             | 68.97 | 87  | 99  |
| fig 6666666.28482.peg.5910 | R018656 | (gi:15841256) PE18 (MT1837) - PE family protein [Mycobacterium tuberculosis str. CDC1551]                                              | 68.97 | 87  | 99  |
| fig 6666666.28482.peg.5910 | R019864 | (gi:340626800) PE18 (MCAN 18061) - PE family protein [Mycobacterium canettii str. CIPT 140010059]                                      | 68.97 | 87  | 99  |
| fig 6666666.28482.peg.5910 | R019866 | (gi:224990173) PE18 (JTY 1804) - PE family protein [Mycobacterium bovis str. BCG str. Tokyo 172]                                       | 68.97 | 87  | 99  |
| fig 6666666.28482.peg.5910 | R018658 | (gi:121637689) PE18 (BCG 1820) - PE family protein [Mycobacterium bovis str. BCG Pasteur 1173P2]                                       | 68.97 | 87  | 99  |

|                            |         |                                                                                                               |       |    |    |
|----------------------------|---------|---------------------------------------------------------------------------------------------------------------|-------|----|----|
| fig 6666666.28482.peg.5910 | R018657 | (gi:31792976) PE18 (Mb1816) - PE family protein [Mycobacterium bovis str. AF2122/97]                          | 68.97 | 87 | 99 |
| fig 6666666.28482.peg.5910 | R019863 | (gi:339631842) PE18 (MAF 18100) - PE family protein [Mycobacterium africanum str. GM041182]                   | 68.97 | 87 | 99 |
| fig 6666666.28482.peg.5910 | R018680 | (gi:41407605) PE19 (MAP1507) - hypothetical protein [Mycobacterium avium str. K-10 (subsp. paratuberculosis)] | 67.82 | 87 | 99 |
| fig 6666666.28482.peg.5910 | R018675 | (gi:57116913) PE19 (Rv1791) - PE family protein [Mycobacterium tuberculosis str. H37Rv]                       | 68.97 | 87 | 99 |
| fig 6666666.28482.peg.5910 | R018676 | (gi:148661598) PE19 (MRA 1805) - PE family protein [Mycobacterium tuberculosis str. H37Ra]                    | 68.97 | 87 | 99 |
| fig 6666666.28482.peg.5910 | R019879 | (gi:340626803) PE19 (MCAN 18091) - PE family protein [Mycobacterium canettii str. CIPT 140010059]             | 68.97 | 87 | 99 |
| fig 6666666.28482.peg.5910 | R019881 | (gi:224990176) PE19 (JTY 1807) - PE family protein [Mycobacterium bovis str. BCG str. Tokyo 172]              | 68.97 | 87 | 99 |
| fig 6666666.28482.peg.5910 | R018679 | (gi:121637692) PE19 (BCG 1823) - PE family protein [Mycobacterium bovis str. BCG Pasteur 1173P2]              | 68.97 | 87 | 99 |
| fig 6666666.28482.peg.5910 | R018678 | (gi:31792979) PE19 (Mb1819) - PE family protein [Mycobacterium bovis str. AF2122/97]                          | 68.97 | 87 | 99 |
| fig 6666666.28482.peg.5910 | R019878 | (gi:339631845) PE19 (MAF 18130) - PE family protein [Mycobacterium africanum str. GM041182]                   | 68.97 | 87 | 99 |
| fig 6666666.28482.peg.5910 | R019880 | (gi:253799168) PE19 (TBMG 02205) - PE family protein [Mycobacterium tuberculosis str. KZN 1435]               | 68.97 | 87 | 99 |
| fig 6666666.28482.peg.5910 | R018674 | (gi:148823006) PE19 (TBFG 11821) - PE family protein [Mycobacterium tuberculosis str. F11]                    | 68.97 | 87 | 99 |
| fig 6666666.28482.peg.5910 | R018677 | (gi:15841261) PE19 (MT1840) - PE family protein [Mycobacterium tuberculosis str. CDC1551]                     | 68.97 | 87 | 99 |
| fig 6666666.28482.peg.5910 | R019867 | (gi:333990534) PE18 (JDM601 1894) - PE-PGRS family protein [Mycobacterium sp. str. JDM601]                    | 67.82 | 87 | 99 |
| fig 6666666.28482.peg.5912 | R014041 | (gi:118464008) esxM (MAV 2922) - hypothetical protein [Mycobacterium avium str. 104]                          | 96.94 | 98 | 98 |
| fig 6666666.28482.peg.5912 | R019810 | (gi:340626804) esxM (MCAN 18101) - ESAT-6 like protein ESXM [Mycobacterium canettii str. CIPT 140010059]      | 87.76 | 98 | 98 |

|                            |         |                                                                                                                |       |     |     |
|----------------------------|---------|----------------------------------------------------------------------------------------------------------------|-------|-----|-----|
| fig 6666666.28482.peg.5912 | R019812 | (gi:224990177) esxM (JTY 1808) - hypothetical protein [Mycobacterium bovis str. BCG str. Tokyo 172]            | 87.76 | 98  | 98  |
| fig 6666666.28482.peg.5912 | R014040 | (gi:121637693) esxM (BCG 1824) - hypothetical protein [Mycobacterium bovis str. BCG Pasteur 1173P2]            | 87.76 | 98  | 98  |
| fig 6666666.28482.peg.5912 | R014039 | (gi:31792980) esxM (Mb1820) - hypothetical protein [Mycobacterium bovis str. AF2122/97]                        | 87.76 | 98  | 98  |
| fig 6666666.28482.peg.5912 | R019809 | (gi:339631846) esxM (MAF 18140) - ESAT-6 like protein ESXM [Mycobacterium africanum str. GM041182]             | 87.76 | 98  | 98  |
| fig 6666666.28482.peg.5912 | R019811 | (gi:253799760) esxM (TBMG 02785) - esat-6 like protein esxK [Mycobacterium tuberculosis str. KZN 1435]         | 86.73 | 98  | 98  |
| fig 6666666.28482.peg.5912 | R019808 | (gi:183982681) esxM (MMAR 2674) - EsaT-6 like protein EsxM [Mycobacterium marinum str. M]                      | 86.46 | 96  | 98  |
| fig 6666666.28482.peg.5912 | R014042 | (gi:118618466) esxM (MUL 3083) - EsaT-6 like protein EsxM [Mycobacterium ulcerans str. Agy99]                  | 84.69 | 96  | 98  |
| fig 6666666.28482.peg.5962 | R014070 | (gi:118462835) eccB5 (MAV 2933) - hypothetical protein [Mycobacterium avium str. 104]                          | 87.94 | 506 | 506 |
| fig 6666666.28482.peg.5962 | R014069 | (gi:41407599) eccB5 (MAP1501) - hypothetical protein [Mycobacterium avium str. K-10 (subsp. paratuberculosis)] | 87.75 | 506 | 506 |
| fig 6666666.28482.peg.5962 | R019795 | (gi:253799177) eccB5 (TBMG 02214) - hypothetical protein [Mycobacterium tuberculosis str. KZN 1435]            | 85.18 | 506 | 506 |
| fig 6666666.28482.peg.5962 | R014064 | (gi:15608920) eccB5 (Rv1782) - PROBABLE CONSERVED MEMBRANE PROTEIN [Mycobacterium tuberculosis str. H37Rv]     | 85.18 | 506 | 506 |
| fig 6666666.28482.peg.5962 | R014065 | (gi:148661590) eccB5 (MRA 1797) - putative conserved membrane protein [Mycobacterium tuberculosis str. H37Ra]  | 85.18 | 506 | 506 |
| fig 6666666.28482.peg.5962 | R014063 | (gi:148822998) eccB5 (TBFG 11813) - hypothetical protein [Mycobacterium tuberculosis str. F11]                 | 85.18 | 506 | 506 |
| fig 6666666.28482.peg.5962 | R014066 | (gi:15841251) eccB5 (MT1832) - hypothetical protein [Mycobacterium tuberculosis str. CDC1551]                  | 85.18 | 506 | 506 |
| fig 6666666.28482.peg.5962 | R019796 | (gi:224990168) eccB5 (JTY 1799) - hypothetical protein [Mycobacterium bovis str. BCG str. Tokyo 172]           | 84.98 | 506 | 506 |
| fig 6666666.28482.peg.5962 | R014068 | (gi:121637684) eccB5 (BCG 1815) - hypothetical protein [Mycobacterium bovis str. BCG Pasteur 1173P2]           | 84.98 | 506 | 506 |

|                            |         |                                                                                                                 |       |      |      |
|----------------------------|---------|-----------------------------------------------------------------------------------------------------------------|-------|------|------|
| fig 6666666.28482.peg.5962 | R014067 | (gi:31792971) eccB5 (Mb1811) - PROBABLE CONSERVED MEMBRANE PROTEIN [Mycobacterium bovis str. AF2122/97]         | 84.98 | 506  | 506  |
| fig 6666666.28482.peg.5962 | R019793 | (gi:339631836) eccB5 (MAF 18040) - putative conserved membrane protein [Mycobacterium africanum str. GM041182]  | 84.98 | 506  | 506  |
| fig 6666666.28482.peg.5962 | R019794 | (gi:340626794) eccB5 (MCAN 18001) - hypothetical protein [Mycobacterium canettii str. CIPT 140010059]           | 84.98 | 506  | 506  |
| fig 6666666.28482.peg.5962 | R019792 | (gi:183982671) eccB5 (MMAR 2664) - hypothetical protein [Mycobacterium marinum str. M]                          | 83.63 | 506  | 506  |
| fig 6666666.28482.peg.5962 | R014072 | (gi:118618476) eccB5 (MUL 3093) - hypothetical protein [Mycobacterium ulcerans str. Agy99]                      | 83.04 | 506  | 506  |
| fig 6666666.28482.peg.5962 | R014071 | (gi:15827812) eccB5 (ML1544) - hypothetical protein [Mycobacterium leprae str. TN]                              | 81.23 | 506  | 506  |
| fig 6666666.28482.peg.5962 | R019797 | (gi:221230289) eccB5 (MLBr 01544) - hypothetical protein [Mycobacterium leprae str. Br4923]                     | 81.23 | 506  | 506  |
| fig 6666666.28482.peg.5962 | R019798 | (gi:333990532) eccB5 (JDM601 1892) - hypothetical protein [Mycobacterium sp. str. JDM601]                       | 71.13 | 484  | 506  |
| fig 6666666.28482.peg.5963 | R014059 | (gi:41407600) eccCa5 (MAP1502) - hypothetical protein [Mycobacterium avium str. K-10 (subsp. paratuberculosis)] | 91.75 | 1389 | 1389 |
| fig 6666666.28482.peg.5963 | R014049 | (gi:41407600) eccCb5 (MAP1502) - hypothetical protein [Mycobacterium avium str. K-10 (subsp. paratuberculosis)] | 91.75 | 1389 | 1389 |
| fig 6666666.28482.peg.5963 | R014060 | (gi:118464740) eccCa5 (MAV 2932) - ftsk/spoiii family protein [Mycobacterium avium str. 104]                    | 91.59 | 1375 | 1389 |
| fig 6666666.28482.peg.5963 | R014050 | (gi:118464740) eccCb5 (MAV 2932) - ftsk/spoiii family protein [Mycobacterium avium str. 104]                    | 91.59 | 1375 | 1389 |
| fig 6666666.28482.peg.5963 | R019804 | (gi:253799176) eccCb5 (TBMG 02213) - FtsK/SpoIIIE family protein [Mycobacterium tuberculosis str. KZN 1435]     | 90.09 | 1389 | 1389 |
| fig 6666666.28482.peg.5963 | R014055 | (gi:148661591) eccCa5 (MRA 1798) - FtsK/SpoIIIE family protein [Mycobacterium tuberculosis str. H37Ra]          | 90.09 | 1389 | 1389 |
| fig 6666666.28482.peg.5963 | R014045 | (gi:148661591) eccCb5 (MRA 1798) - FtsK/SpoIIIE family protein [Mycobacterium tuberculosis str. H37Ra]          | 90.09 | 1389 | 1389 |
| fig 6666666.28482.peg.5963 | R014053 | (gi:148822999) eccCa5 (TBF 11814) - hypothetical protein [Mycobacterium tuberculosis str. F11]                  | 90.09 | 1389 | 1389 |

|                            |         |                                                                                                                  |       |      |      |
|----------------------------|---------|------------------------------------------------------------------------------------------------------------------|-------|------|------|
| fig 6666666.28482.peg.5963 | R014043 | (gi:148822999) eccCb5 (TBFG 11814) - hypothetical protein [Mycobacterium tuberculosis str. F11]                  | 90.09 | 1389 | 1389 |
| fig 6666666.28482.peg.5963 | R014056 | (gi:15841252) eccCa5 (MT1833) - FtsK/SpoIIIE family protein [Mycobacterium tuberculosis str. CDC1551]            | 90.09 | 1389 | 1389 |
| fig 6666666.28482.peg.5963 | R014046 | (gi:15841252) eccCb5 (MT1833) - FtsK/SpoIIIE family protein [Mycobacterium tuberculosis str. CDC1551]            | 90.09 | 1389 | 1389 |
| fig 6666666.28482.peg.5963 | R014057 | (gi:31792972) eccCa5 (Mb1812) - PROBABLE CONSERVED MEMBRANE PROTEIN [Mycobacterium bovis str. AF2122/97]         | 90.01 | 1389 | 1389 |
| fig 6666666.28482.peg.5963 | R014047 | (gi:31792972) eccCb5 (Mb1812) - PROBABLE CONSERVED MEMBRANE PROTEIN [Mycobacterium bovis str. AF2122/97]         | 90.01 | 1389 | 1389 |
| fig 6666666.28482.peg.5963 | R014058 | (gi:121637685) eccCa5 (BCG 1816) - hypothetical protein [Mycobacterium bovis str. BCG Pasteur 1173P2]            | 89.94 | 1389 | 1389 |
| fig 6666666.28482.peg.5963 | R014048 | (gi:121637685) eccCb5 (BCG 1816) - hypothetical protein [Mycobacterium bovis str. BCG Pasteur 1173P2]            | 89.94 | 1389 | 1389 |
| fig 6666666.28482.peg.5963 | R019805 | (gi:224990169) eccCb5 (JTY 1800) - hypothetical protein [Mycobacterium bovis str. BCG str. Tokyo 172]            | 89.94 | 1389 | 1389 |
| fig 6666666.28482.peg.5963 | R019801 | (gi:183982672) eccCb5 (MMAR 2665) - FtsK/SpoIIIE family protein [Mycobacterium marinum str. M]                   | 89.01 | 1389 | 1389 |
| fig 6666666.28482.peg.5963 | R014062 | (gi:118618475) eccCa5 (MUL 3092) - conserved FtsK/SpoIIIE family protein [Mycobacterium ulcerans str. Agy99]     | 88.71 | 1389 | 1389 |
| fig 6666666.28482.peg.5963 | R014052 | (gi:118618475) eccCb5 (MUL 3092) - conserved FtsK/SpoIIIE family protein [Mycobacterium ulcerans str. Agy99]     | 88.71 | 1389 | 1389 |
| fig 6666666.28482.peg.5963 | R014061 | (gi:15827811) eccCa5 (ML1543) - possible SpoIIIE-family membrane protein [Mycobacterium leprae str. TN]          | 87.28 | 1337 | 1389 |
| fig 6666666.28482.peg.5963 | R014051 | (gi:15827811) eccCb5 (ML1543) - possible SpoIIIE-family membrane protein [Mycobacterium leprae str. TN]          | 87.28 | 1337 | 1389 |
| fig 6666666.28482.peg.5963 | R019806 | (gi:221230288) eccCb5 (MLBr 01543) - putative SpoIIIE-family membrane protein [Mycobacterium leprae str. Br4923] | 87.28 | 1337 | 1389 |
| fig 6666666.28482.peg.5963 | R019807 | (gi:333990533) eccCb5 (JDM601 1893) - FtsK/SpoIIIE family protein [Mycobacterium sp. str. JDM601]                | 80.6  | 1389 | 1389 |
| fig 6666666.28482.peg.5963 | R014044 | (gi:15608922) eccCb5 (Rv1784) - hypothetical protein [Mycobacterium tuberculosis str. H37Rv]                     | 90.57 | 930  | 1389 |

|                            |         |                                                                                                                       |       |     |      |
|----------------------------|---------|-----------------------------------------------------------------------------------------------------------------------|-------|-----|------|
| fig 6666666.28482.peg.5963 | R019803 | (gi:340626796) eccCb5 (MCAN 18021) - hypothetical protein [Mycobacterium canettii str. CIPT 140010059]                | 90.57 | 930 | 1389 |
| fig 6666666.28482.peg.5963 | R019802 | (gi:339631838) eccCb5 (MAF 18060) - hypothetical protein [Mycobacterium africanum str. GM041182]                      | 90.57 | 930 | 1389 |
| fig 6666666.28482.peg.5964 | R018629 | (gi:118618474) cyp143A4 (MUL 3091) - cytochrome P450 143A4 Cyp143A4 [Mycobacterium ulcerans str. Agy99]               | 78.83 | 391 | 391  |
| fig 6666666.28482.peg.5964 | R019847 | (gi:183982673) cyp143A4 (MMAR 2666) - cytochrome P450 143A4 Cyp143A4 [Mycobacterium marinum str. M]                   | 78.57 | 391 | 391  |
| fig 6666666.28482.peg.5964 | R018628 | (gi:118465559) MAV2931 - P450 heme-thiolate protein [Mycobacterium avium str. 104]                                    | 78.09 | 388 | 391  |
| fig 6666666.28482.peg.5964 | R018627 | (gi:41407601) MAP1503c - hypothetical protein [Mycobacterium avium str. K-10 (subsp. paratuberculosis)]               | 77.25 | 378 | 391  |
| fig 6666666.28482.peg.5964 | R019849 | (gi:340626797) cyp143 (MCAN 18031) - putative cytochrome P450 143 CYP143 [Mycobacterium canettii str. CIPT 140010059] | 74.55 | 391 | 391  |
| fig 6666666.28482.peg.5964 | R019850 | (gi:253799175) TBMG02212 - cytochrome P450 143 cyp143 [Mycobacterium tuberculosis str. KZN 1435]                      | 74.55 | 391 | 391  |
| fig 6666666.28482.peg.5964 | R018622 | (gi:15608923) cyp143 (Rv1785c) - cytochrome P450 143 [Mycobacterium tuberculosis str. H37Rv]                          | 74.55 | 391 | 391  |
| fig 6666666.28482.peg.5964 | R018623 | (gi:148661592) cyp143 (MRA 1799) - putative cytochrome p450 143 CYP143 [Mycobacterium tuberculosis str. H37Ra]        | 74.55 | 391 | 391  |
| fig 6666666.28482.peg.5964 | R018621 | (gi:148823000) TBF11815 - cytochrome P450 143 cyp143 [Mycobacterium tuberculosis str. F11]                            | 74.55 | 391 | 391  |
| fig 6666666.28482.peg.5964 | R019851 | (gi:224990170) cyp143 (JTY 1801) - putative cytochrome P450 143 [Mycobacterium bovis str. BCG str. Tokyo 172]         | 74.55 | 391 | 391  |
| fig 6666666.28482.peg.5964 | R018626 | (gi:121637686) cyp143 (BCG 1817c) - putative cytochrome P450 143 cyp143 [Mycobacterium bovis str. BCG Pasteur 1173P2] | 74.55 | 391 | 391  |
| fig 6666666.28482.peg.5964 | R018625 | (gi:31792973) cyp143 (Mb1813c) - cytochrome P450 143 [Mycobacterium bovis str. AF2122/97]                             | 74.55 | 391 | 391  |
| fig 6666666.28482.peg.5964 | R019848 | (gi:339631839) cyp143 (MAF 18070) - putative cytochrome P450 143 CYP143 [Mycobacterium africanum str. GM041182]       | 74.55 | 391 | 391  |
| fig 6666666.28482.peg.5964 | R018624 | (gi:15841253) MT1834 - P450 heme-thiolate protein [Mycobacterium tuberculosis str. CDC1551]                           | 74.55 | 391 | 391  |

|                            |         |                                                                                                        |       |     |     |
|----------------------------|---------|--------------------------------------------------------------------------------------------------------|-------|-----|-----|
| fig 6666666.28482.peg.5964 | R018631 | (gi:126436732) Mjls4160 - cytochrome P450 [Mycobacterium sp. str. JLS]                                 | 60.95 | 377 | 391 |
| fig 6666666.28482.peg.5965 | R018640 | (gi:41407602) MAP1504 - hypothetical protein [Mycobacterium avium str. K-10 (subsp. paratuberculosis)] | 89.13 | 46  | 46  |
| fig 6666666.28482.peg.5965 | R018642 | (gi:118618473) MUL3090 - ferredoxin [Mycobacterium ulcerans str. Agy99]                                | 86.96 | 46  | 46  |
| fig 6666666.28482.peg.5965 | R019852 | (gi:183982674) MMAR2667 - ferredoxin [Mycobacterium marinum str. M]                                    | 86.96 | 46  | 46  |
| fig 6666666.28482.peg.5965 | R018643 | (gi:126436671) Mjls4098 - hypothetical protein [Mycobacterium sp. str. JLS]                            | 82.61 | 46  | 46  |
| fig 6666666.28482.peg.5965 | R019855 | (gi:253799174) TBMG02211 - ferredoxin [Mycobacterium tuberculosis str. KZN 1435]                       | 84.78 | 46  | 46  |
| fig 6666666.28482.peg.5965 | R018635 | (gi:15608924) Rv1786 - ferredoxin [Mycobacterium tuberculosis str. H37Rv]                              | 84.78 | 46  | 46  |
| fig 6666666.28482.peg.5965 | R018636 | (gi:148661593) MRA1800 - putative ferredoxin [Mycobacterium tuberculosis str. H37Ra]                   | 84.78 | 46  | 46  |
| fig 6666666.28482.peg.5965 | R018634 | (gi:148823001) TBF11816 - ferredoxin [Mycobacterium tuberculosis str. F11]                             | 84.78 | 46  | 46  |
| fig 6666666.28482.peg.5965 | R018637 | (gi:15841254) MT1835 - ferredoxin, putative [Mycobacterium tuberculosis str. CDC1551]                  | 84.78 | 46  | 46  |
| fig 6666666.28482.peg.5965 | R019856 | (gi:224990171) JTY1802 - putative ferredoxin [Mycobacterium bovis str. BCG str. Tokyo 172]             | 84.78 | 46  | 46  |
| fig 6666666.28482.peg.5965 | R018639 | (gi:121637687) BCG1818 - putative ferredoxin [Mycobacterium bovis str. BCG Pasteur 1173P2]             | 84.78 | 46  | 46  |
| fig 6666666.28482.peg.5965 | R018638 | (gi:31792974) Mb1814 - putative ferredoxin [Mycobacterium bovis str. AF2122/97]                        | 84.78 | 46  | 46  |
| fig 6666666.28482.peg.5965 | R019853 | (gi:339631840) MAF18080 - putative ferredoxin [Mycobacterium africanum str. GM041182]                  | 84.78 | 46  | 46  |
| fig 6666666.28482.peg.5965 | R019854 | (gi:340626798) MCAN18041 - putative ferredoxin [Mycobacterium canettii str. CIPT 140010059]            | 82.61 | 46  | 46  |
| fig 6666666.28482.peg.5965 | R018641 | (gi:118465392) MAV2592 - hypothetical protein [Mycobacterium avium str. 104]                           | 82.22 | 45  | 46  |

|                            |         |                                                                                                               |       |    |    |
|----------------------------|---------|---------------------------------------------------------------------------------------------------------------|-------|----|----|
| fig 6666666.28482.peg.5967 | R019862 | (gi:183982677) PE18 (MMAR 2670) - PE family protein, PE19 1 [Mycobacterium marinum str. M]                    | 89.66 | 87 | 99 |
| fig 6666666.28482.peg.5967 | R018659 | (gi:118618471) PE18 (MUL 3088) - PE family protein [Mycobacterium ulcerans str. Agy99]                        | 88.51 | 87 | 99 |
| fig 6666666.28482.peg.5967 | R018680 | (gi:41407605) PE19 (MAP1507) - hypothetical protein [Mycobacterium avium str. K-10 (subsp. paratuberculosis)] | 87.36 | 87 | 99 |
| fig 6666666.28482.peg.5967 | R019865 | (gi:253799172) PE18 (TBMG 02209) - PE family protein [Mycobacterium tuberculosis str. KZN 1435]               | 90.8  | 87 | 99 |
| fig 6666666.28482.peg.5967 | R018654 | (gi:57116910) PE18 (Rv1788) - PE family protein [Mycobacterium tuberculosis str. H37Rv]                       | 90.8  | 87 | 99 |
| fig 6666666.28482.peg.5967 | R018655 | (gi:148661595) PE18 (MRA 1802) - PE family protein [Mycobacterium tuberculosis str. H37Ra]                    | 90.8  | 87 | 99 |
| fig 6666666.28482.peg.5967 | R018653 | (gi:148823003) PE18 (TBFG 11818) - PE family protein [Mycobacterium tuberculosis str. F11]                    | 90.8  | 87 | 99 |
| fig 6666666.28482.peg.5967 | R018656 | (gi:15841256) PE18 (MT1837) - PE family protein [Mycobacterium tuberculosis str. CDC1551]                     | 90.8  | 87 | 99 |
| fig 6666666.28482.peg.5967 | R019864 | (gi:340626800) PE18 (MCAN 18061) - PE family protein [Mycobacterium canettii str. CIPT 140010059]             | 90.8  | 87 | 99 |
| fig 6666666.28482.peg.5967 | R019866 | (gi:224990173) PE18 (JTY 1804) - PE family protein [Mycobacterium bovis str. BCG str. Tokyo 172]              | 90.8  | 87 | 99 |
| fig 6666666.28482.peg.5967 | R018658 | (gi:121637689) PE18 (BCG 1820) - PE family protein [Mycobacterium bovis str. BCG Pasteur 1173P2]              | 90.8  | 87 | 99 |
| fig 6666666.28482.peg.5967 | R018657 | (gi:31792976) PE18 (Mb1816) - PE family protein [Mycobacterium bovis str. AF2122/97]                          | 90.8  | 87 | 99 |
| fig 6666666.28482.peg.5967 | R019863 | (gi:339631842) PE18 (MAF 18100) - PE family protein [Mycobacterium africanum str. GM041182]                   | 90.8  | 87 | 99 |
| fig 6666666.28482.peg.5967 | R019877 | (gi:183982680) PE19 (MMAR 2673) - PE family protein, PE19 [Mycobacterium marinum str. M]                      | 88.51 | 87 | 99 |
| fig 6666666.28482.peg.5967 | R018675 | (gi:57116913) PE19 (Rv1791) - PE family protein [Mycobacterium tuberculosis str. H37Rv]                       | 86.21 | 87 | 99 |
| fig 6666666.28482.peg.5967 | R018676 | (gi:148661598) PE19 (MRA 1805) - PE family protein [Mycobacterium tuberculosis str. H37Ra]                    | 86.21 | 87 | 99 |



|                            |         |                                                                                                                           |       |     |     |
|----------------------------|---------|---------------------------------------------------------------------------------------------------------------------------|-------|-----|-----|
| fig 6666666.28482.peg.5967 | R019879 | (gi:340626803) PE19 (MCAN 18091) - PE family protein [Mycobacterium canettii str. CIPT 140010059]                         | 86.21 | 87  | 99  |
| fig 6666666.28482.peg.5967 | R019881 | (gi:224990176) PE19 (JTY 1807) - PE family protein [Mycobacterium bovis str. BCG str. Tokyo 172]                          | 86.21 | 87  | 99  |
| fig 6666666.28482.peg.5967 | R018679 | (gi:121637692) PE19 (BCG 1823) - PE family protein [Mycobacterium bovis str. BCG Pasteur 1173P2]                          | 86.21 | 87  | 99  |
| fig 6666666.28482.peg.5967 | R018678 | (gi:31792979) PE19 (Mb1819) - PE family protein [Mycobacterium bovis str. AF2122/97]                                      | 86.21 | 87  | 99  |
| fig 6666666.28482.peg.5967 | R019878 | (gi:339631845) PE19 (MAF 18130) - PE family protein [Mycobacterium africanum str. GM041182]                               | 86.21 | 87  | 99  |
| fig 6666666.28482.peg.5967 | R019880 | (gi:253799168) PE19 (TBMG 02205) - PE family protein [Mycobacterium tuberculosis str. KZN 1435]                           | 86.21 | 87  | 99  |
| fig 6666666.28482.peg.5967 | R018674 | (gi:148823006) PE19 (TBFG 11821) - PE family protein [Mycobacterium tuberculosis str. F11]                                | 86.21 | 87  | 99  |
| fig 6666666.28482.peg.5967 | R018677 | (gi:15841261) PE19 (MT1840) - PE family protein [Mycobacterium tuberculosis str. CDC1551]                                 | 86.21 | 87  | 99  |
| fig 6666666.28482.peg.5967 | R019867 | (gi:333990534) PE18 (JDM601 1894) - PE-PGRS family protein [Mycobacterium sp. str. JDM601]                                | 86.21 | 87  | 99  |
| fig 6666666.28482.peg.6045 | R006122 | (gi:118465794) sigA/rpoV (MAV 3595) - sigma factor MysA [Mycobacterium avium str. 104]                                    | 87.82 | 507 | 507 |
| fig 6666666.28482.peg.6045 | R006121 | (gi:41408918) sigA/rpoV (MAP2820) - RNA polymerase sigma factor [Mycobacterium avium str. K-10 (subsp. paratuberculosis)] | 86.84 | 507 | 507 |
| fig 6666666.28482.peg.6045 | R006123 | (gi:15827492) sigA/rpoV (ML1022) - RNA polymerase sigma factor [Mycobacterium leprae str. TN]                             | 80.39 | 507 | 507 |
| fig 6666666.28482.peg.6045 | R019213 | (gi:221229969) sigA/rpoV (MLBr 01022) - RNA polymerase sigma factor [Mycobacterium leprae str. Br4923]                    | 80.39 | 507 | 507 |
| fig 6666666.28482.peg.6045 | R019211 | (gi:253798215) sigA/rpoV (TBMG 01270) - RNA polymerase sigma factor [Mycobacterium tuberculosis str. KZN 1435]            | 78.27 | 507 | 507 |
| fig 6666666.28482.peg.6045 | R006116 | (gi:15609840) sigA/rpoV (Rv2703) - RNA polymerase sigma factor [Mycobacterium tuberculosis str. H37Rv]                    | 78.27 | 507 | 507 |
| fig 6666666.28482.peg.6045 | R006117 | (gi:148662544) sigA/rpoV (MRA 2731) - RNA polymerase sigma factor [Mycobacterium tuberculosis str. H37Ra]                 | 78.27 | 507 | 507 |

|                            |         |                                                                                                                             |       |     |     |
|----------------------------|---------|-----------------------------------------------------------------------------------------------------------------------------|-------|-----|-----|
| fig 6666666.28482.peg.6045 | R013497 | (gi:148823893) sigA/rpoV (TBFG 12718) - RNA polymerase sigma factor sigA [Mycobacterium tuberculosis str. F11]              | 78.27 | 507 | 507 |
| fig 6666666.28482.peg.6045 | R006118 | (gi:15842241) sigA/rpoV (MT2777) - RNA polymerase sigma factor [Mycobacterium tuberculosis str. CDC1551]                    | 78.27 | 507 | 507 |
| fig 6666666.28482.peg.6045 | R019210 | (gi:340627704) sigA/rpoV (MCAN 27291) - RNA polymerase sigma factor SIGA [Mycobacterium canettii str. CIPT 140010059]       | 78.27 | 507 | 507 |
| fig 6666666.28482.peg.6045 | R019212 | (gi:224991070) sigA/rpoV (JTY 2710) - RNA polymerase sigma factor [Mycobacterium bovis str. BCG str. Tokyo 172]             | 78.27 | 507 | 507 |
| fig 6666666.28482.peg.6045 | R006120 | (gi:121638578) sigA/rpoV (BCG 2716) - RNA polymerase sigma factor sigA [Mycobacterium bovis str. BCG Pasteur 1173P2]        | 78.27 | 507 | 507 |
| fig 6666666.28482.peg.6045 | R006119 | (gi:31793875) sigA/rpoV (Mb2722) - RNA polymerase sigma factor [Mycobacterium bovis str. AF2122/97]                         | 78.27 | 507 | 507 |
| fig 6666666.28482.peg.6045 | R019209 | (gi:339632715) sigA/rpoV (MAF 27070) - RNA polymerase sigma factor SIGA (SIGMA-A) [Mycobacterium africanum str. GM041182]   | 78.08 | 507 | 507 |
| fig 6666666.28482.peg.6045 | R006127 | (gi:120403451) sigA/rpoV (Mvan 2461) - RNA polymerase, sigma 70 subunit, RpoD family [Mycobacterium vanbaalenii str. PYR-1] | 83.19 | 448 | 507 |
| fig 6666666.28482.peg.6045 | R019207 | (gi:183982025) sigA/rpoV (MMAR 2011) - RNA polymerase sigma factor [Mycobacterium marinum str. M]                           | 97.97 | 345 | 507 |
| fig 6666666.28482.peg.6045 | R006124 | (gi:118618666) sigA/rpoV (MUL 3341) - RNA polymerase sigma factor SigA [Mycobacterium ulcerans str. Agy99]                  | 97.97 | 345 | 507 |
| fig 6666666.28482.peg.6045 | R006126 | (gi:145224520) sigA/rpoV (Mflv 3939) - RNA polymerase, sigma 70 subunit, RpoD family [Mycobacterium gilvum str. PYR-GCK]    | 81.92 | 448 | 507 |
| fig 6666666.28482.peg.6045 | R006130 | (gi:108799152) sigA/rpoV (Mmcs 2185) - RNA polymerase, sigma 28 subunit [Mycobacterium sp. str. MCS]                        | 94.15 | 359 | 507 |
| fig 6666666.28482.peg.6045 | R006129 | (gi:119868267) sigA/rpoV (Mkms 2231) - RNA polymerase, sigma 70 subunit, RpoD family [Mycobacterium sp. str. KMS]           | 94.15 | 359 | 507 |
| fig 6666666.28482.peg.6045 | R006128 | (gi:126434760) sigA/rpoV (Mjls 2174) - RNA polymerase, sigma 70 subunit, RpoD family [Mycobacterium sp. str. JLS]           | 94.15 | 359 | 507 |
| fig 6666666.28482.peg.6045 | R019214 | (gi:333991084) sigA/rpoV (JDM601 2444) - RNA polymerase sigma factor SigB [Mycobacterium sp. str. JDM601]                   | 86.37 | 411 | 507 |
| fig 6666666.28482.peg.6045 | R006125 | (gi:118469122) sigA/rpoV (MSMEG 2758) - sigma factor MysA [Mycobacterium smegmatis str. MC2 155]                            | 95.69 | 348 | 507 |

|                            |         |                                                                                                                                |       |     |     |
|----------------------------|---------|--------------------------------------------------------------------------------------------------------------------------------|-------|-----|-----|
| fig 6666666.28482.peg.6045 | R019208 | (gi:169630092) sigA/rpoV (MAB 3009) - RNA polymerase sigma factor<br>[Mycobacterium abscessus str. ATCC 19977]                 | 97.63 | 338 | 507 |
| fig 6666666.28482.peg.6068 | R019031 | (gi:253798207) ideR (TBMG 01263) - iron-dependent repressor and activator ideR<br>[Mycobacterium tuberculosis str. KZN 1435]   | 93.51 | 231 | 231 |
| fig 6666666.28482.peg.6068 | R005833 | (gi:15609848) ideR (Rv2711) - IRON-DEPENDENT REPRESSOR AND ACTIVATOR IDER<br>[Mycobacterium tuberculosis str. H37Rv]           | 93.51 | 231 | 231 |
| fig 6666666.28482.peg.6068 | R005834 | (gi:148662552) ideR (MRA 2739) - iron-dependent repressor IdeR [Mycobacterium<br>tuberculosis str. H37Ra]                      | 93.51 | 231 | 231 |
| fig 6666666.28482.peg.6068 | R013459 | (gi:148823900) ideR (TBMG 12725) - iron-dependent repressor and activator ideR<br>[Mycobacterium tuberculosis str. F11]        | 93.51 | 231 | 231 |
| fig 6666666.28482.peg.6068 | R005835 | (gi:15842249) ideR (MT2784) - iron-dependent repressor IdeR [Mycobacterium<br>tuberculosis str. CDC1551]                       | 93.51 | 231 | 231 |
| fig 6666666.28482.peg.6068 | R019030 | (gi:340627712) ideR (MCAN 27371) - iron-dependent repressor and activator IDER<br>[Mycobacterium canettii str. CIPT 140010059] | 93.51 | 231 | 231 |
| fig 6666666.28482.peg.6068 | R019032 | (gi:224991078) ideR (JTY 2718) - iron-dependent repressor and activator<br>[Mycobacterium bovis str. BCG str. Tokyo 172]       | 93.51 | 231 | 231 |
| fig 6666666.28482.peg.6068 | R005837 | (gi:121638586) ideR (BCG 2724) - Iron-dependent repressor and activator ideR<br>[Mycobacterium bovis str. BCG Pasteur 1173P2]  | 93.51 | 231 | 231 |
| fig 6666666.28482.peg.6068 | R005836 | (gi:31793883) ideR (Mb2730) - IRON-DEPENDENT REPRESSOR AND ACTIVATOR IDER<br>[Mycobacterium bovis str. AF2122/97]              | 93.51 | 231 | 231 |
| fig 6666666.28482.peg.6068 | R019029 | (gi:339632723) ideR (MAF 27150) - iron-dependent repressor and activator IDER<br>[Mycobacterium africanum str. GM041182]       | 93.51 | 231 | 231 |
| fig 6666666.28482.peg.6068 | R005839 | (gi:118465346) ideR (MAV 3604) - iron-dependent repressor IdeR [Mycobacterium<br>avium str. 104]                               | 92.21 | 231 | 231 |
| fig 6666666.28482.peg.6068 | R019027 | (gi:183982016) ideR (MMAR 2002) - iron-dependent repressor and activator IdeR<br>[Mycobacterium marinum str. M]                | 92.64 | 231 | 231 |
| fig 6666666.28482.peg.6068 | R005841 | (gi:118618674) ideR (MUL 3351) - iron-dependent repressor and activator IdeR<br>[Mycobacterium ulcerans str. Agy99]            | 92.21 | 231 | 231 |
| fig 6666666.28482.peg.6068 | R005840 | (gi:15827486) ideR (ML1013) - iron dependent repressor [Mycobacterium leprae<br>str. TN]                                       | 89.61 | 231 | 231 |
| fig 6666666.28482.peg.6068 | R019033 | (gi:221229963) ideR (MLBr 01013) - iron dependent repressor [Mycobacterium<br>leprae str. Br4923]                              | 89.61 | 231 | 231 |

|                            |         |                                                                                                                             |       |     |     |
|----------------------------|---------|-----------------------------------------------------------------------------------------------------------------------------|-------|-----|-----|
| fig 6666666.28482.peg.6068 | R019034 | (gi:333991093) ideR (JDM601 2453) - iron-dependent repressor and activator IdeR [Mycobacterium sp. str. JDM601]             | 86.58 | 231 | 231 |
| fig 6666666.28482.peg.6068 | R005847 | (gi:108799143) ideR (Mmcs 2176) - iron (metal) dependent repressor, DtxR family [Mycobacterium sp. str. MCS]                | 86.15 | 231 | 231 |
| fig 6666666.28482.peg.6068 | R005846 | (gi:119868258) ideR (Mkms 2222) - iron dependent repressor [Mycobacterium sp. str. KMS]                                     | 86.15 | 231 | 231 |
| fig 6666666.28482.peg.6068 | R005845 | (gi:126434751) ideR (Mjls 2165) - iron dependent repressor [Mycobacterium sp. str. JLS]                                     | 86.15 | 231 | 231 |
| fig 6666666.28482.peg.6068 | R005843 | (gi:145224530) ideR (Mflv 3949) - iron dependent repressor [Mycobacterium gilvum str. PYR-GCK]                              | 85.71 | 231 | 231 |
| fig 6666666.28482.peg.6068 | R005842 | (gi:118468273) ideR (MSMEG 2750) - iron-dependent repressor IdeR [Mycobacterium smegmatis str. MC2 155]                     | 84.85 | 231 | 231 |
| fig 6666666.28482.peg.6068 | R005844 | (gi:120403440) ideR (Mvan 2450) - iron dependent repressor [Mycobacterium vanbaalenii str. PYR-1]                           | 85.28 | 231 | 231 |
| fig 6666666.28482.peg.6068 | R019028 | (gi:169630112) ideR (MAB 3029) - Iron-dependent repressor IdeR [Mycobacterium abscessus str. ATCC 19977]                    | 81.82 | 231 | 231 |
| fig 6666666.28482.peg.6069 | R006125 | (gi:118469122) sigA/rpoV (MSMEG 2758) - sigma factor MysA [Mycobacterium smegmatis str. MC2 155]                            | 62.86 | 311 | 319 |
| fig 6666666.28482.peg.6069 | R006128 | (gi:126434760) sigA/rpoV (Mjls 2174) - RNA polymerase, sigma 70 subunit, RpoD family [Mycobacterium sp. str. JLS]           | 62.54 | 311 | 319 |
| fig 6666666.28482.peg.6069 | R006130 | (gi:108799152) sigA/rpoV (Mmcs 2185) - RNA polymerase, sigma 28 subunit [Mycobacterium sp. str. MCS]                        | 62.54 | 311 | 319 |
| fig 6666666.28482.peg.6069 | R006129 | (gi:119868267) sigA/rpoV (Mkms 2231) - RNA polymerase, sigma 70 subunit, RpoD family [Mycobacterium sp. str. KMS]           | 62.54 | 311 | 319 |
| fig 6666666.28482.peg.6069 | R019208 | (gi:169630092) sigA/rpoV (MAB 3009) - RNA polymerase sigma factor [Mycobacterium abscessus str. ATCC 19977]                 | 62.54 | 311 | 319 |
| fig 6666666.28482.peg.6069 | R006122 | (gi:118465794) sigA/rpoV (MAV 3595) - sigma factor MysA [Mycobacterium avium str. 104]                                      | 62.86 | 311 | 319 |
| fig 6666666.28482.peg.6069 | R006127 | (gi:120403451) sigA/rpoV (Mvan 2461) - RNA polymerase, sigma 70 subunit, RpoD family [Mycobacterium vanbaalenii str. PYR-1] | 62.86 | 311 | 319 |
| fig 6666666.28482.peg.6069 | R019207 | (gi:183982025) sigA/rpoV (MMAR 2011) - RNA polymerase sigma factor [Mycobacterium marinum str. M]                           | 62.86 | 311 | 319 |

|                            |         |                                                                                                                           |       |     |     |
|----------------------------|---------|---------------------------------------------------------------------------------------------------------------------------|-------|-----|-----|
| fig 6666666.28482.peg.6069 | R006126 | (gi:145224520) sigA/rpoV (Mflv 3939) - RNA polymerase, sigma 70 subunit, RpoD family [Mycobacterium gilvum str. PYR-GCK]  | 62.54 | 311 | 319 |
| fig 6666666.28482.peg.6069 | R006124 | (gi:118618666) sigA/rpoV (MUL 3341) - RNA polymerase sigma factor SigA [Mycobacterium ulcerans str. Agy99]                | 62.86 | 311 | 319 |
| fig 6666666.28482.peg.6069 | R006121 | (gi:41408918) sigA/rpoV (MAP2820) - RNA polymerase sigma factor [Mycobacterium avium str. K-10 (subsp. paratuberculosis)] | 62.54 | 311 | 319 |
| fig 6666666.28482.peg.6069 | R019214 | (gi:333991084) sigA/rpoV (JDM601 2444) - RNA polymerase sigma factor SigB [Mycobacterium sp. str. JDM601]                 | 62.22 | 311 | 319 |

---
