# Supplementary material for: Comparative Genomic Analysis Reveals a Possible Novel Non-Tuberculous Mycobacterium Species with High Pathogenic Potential
Source: PLoS One. 2016 Apr 1;11(4):e0150413. doi: 10.1371/journal.pone.0150413 (PMC4818103; doi:10.1371/journal.pone.0150413)
Supplement: S1 Table — (PDF) [file pone.0150413.s005.pdf]

**Supplementary Table S1: A List of RAST-predicted genes**

| RAST_ORF_id             | contig number | start | stop | strand | function                                                                          | figfam      | evidence_codes                                                                                             |
|-------------------------|---------------|-------|------|--------|-----------------------------------------------------------------------------------|-------------|------------------------------------------------------------------------------------------------------------|
| fig 6666666.28482.peg.1 | Contig_1      | 73    | 597  | +      | NAD-dependent<br>glyceraldehyde-3-<br>phosphate<br>dehydrogenase (EC<br>1.2.1.12) | FIG00132586 | isu;Redox-<br>dependent_regulation_of_nucleus_pr<br>ocesses<br>isu;Pyridoxin_(Vitamin_B6)_Biosynth<br>esis |
| fig 6666666.28482.peg.2 | Contig_1      | 2128  | 608  | -      | NADH-ubiquinone<br>oxidoreductase chain N<br>(EC 1.6.5.3)                         | FIG00000512 | icw(3);Respiratory_Complex_I<br>icw(3);NADH_ubiquinone_oxidoreduc<br>tase                                  |
| fig 6666666.28482.peg.3 | Contig_1      | 3630  | 2125 | -      | NADH-ubiquinone<br>oxidoreductase chain M<br>(EC 1.6.5.3)                         | FIG00138227 | icw(6);Respiratory_Complex_I<br>icw(6);NADH_ubiquinone_oxidoreduc<br>tase                                  |
| fig 6666666.28482.peg.4 | Contig_1      | 5507  | 3627 | -      | NADH-ubiquinone<br>oxidoreductase chain L<br>(EC 1.6.5.3)                         | FIG00068727 | icw(1);Respiratory_Complex_I<br>icw(1);NADH_ubiquinone_oxidoreduc<br>tase                                  |
| fig 6666666.28482.peg.5 | Contig_1      | 5850  | 5518 | -      | NADH-ubiquinone<br>oxidoreductase chain K<br>(EC 1.6.5.3)                         | FIG00000559 | idu(1);Respiratory_Complex_I<br>idu(1);NADH_ubiquinone_oxidoreduc<br>tase                                  |
| fig 6666666.28482.peg.6 | Contig_1      | 6617  | 5814 | -      | NADH-ubiquinone<br>oxidoreductase chain J<br>(EC 1.6.5.3)                         | FIG00000569 | icw(2);Respiratory_Complex_I<br>icw(2);NADH_ubiquinone_oxidoreduc<br>tase                                  |
| fig 6666666.28482.peg.7 | Contig_1      | 7042  | 6614 | -      | NADH-ubiquinone<br>oxidoreductase chain I<br>(EC 1.6.5.3)                         | FIG00138210 | icw(4);Respiratory_Complex_I<br>icw(4);NADH_ubiquinone_oxidoreduc<br>tase                                  |
| fig 6666666.28482.peg.8 | Contig_1      | 8252  | 7035 | -      | NADH-ubiquinone<br>oxidoreductase chain H<br>(EC 1.6.5.3)                         | FIG00133041 | icw(3);Respiratory_Complex_I<br>icw(3);NADH_ubiquinone_oxidoreduc<br>tase                                  |
| fig 6666666.28482.peg.9 | Contig_1      | 10549 | 8249 | -      | NADH-ubiquinone<br>oxidoreductase chain G<br>(EC 1.6.5.3)                         | FIG00010922 | icw(7);Respiratory_Complex_I<br>icw(7);NADH_ubiquinone_oxidoreduc<br>tase                                  |

|                          |          |       |       |   |                                                           |             |                                                                                   |
|--------------------------|----------|-------|-------|---|-----------------------------------------------------------|-------------|-----------------------------------------------------------------------------------|
| fig 6666666.28482.peg.10 | Contig_1 | 11862 | 10546 | - | NADH-ubiquinone<br>oxidoreductase chain F<br>(EC 1.6.5.3) | FIG00117890 | icw(5);Respiratory_Complex_I<br>icw(5);NADH_ubiquinone_oxidoreduc<br>tase         |
| fig 6666666.28482.peg.11 | Contig_1 | 12586 | 11864 | - | NADH-ubiquinone<br>oxidoreductase chain E<br>(EC 1.6.5.3) | FIG00000705 | icw(1);Respiratory_Complex_I<br>icw(1);NADH_ubiquinone_oxidoreduc<br>tase         |
| fig 6666666.28482.peg.12 | Contig_1 | 13875 | 12583 | - | NADH-ubiquinone<br>oxidoreductase chain D<br>(EC 1.6.5.3) | FIG00138449 | icw(6);Respiratory_Complex_I<br>icw(6);NADH_ubiquinone_oxidoreduc<br>tase         |
| fig 6666666.28482.peg.13 | Contig_1 | 14528 | 13875 | - | NADH-ubiquinone<br>oxidoreductase chain C<br>(EC 1.6.5.3) | FIG00000785 | icw(4);Respiratory_Complex_I<br>icw(4);NADH_ubiquinone_oxidoreduc<br>tase         |
| fig 6666666.28482.peg.14 | Contig_1 | 15079 | 14525 | - | NADH-ubiquinone<br>oxidoreductase chain B<br>(EC 1.6.5.3) |             | icw(1);Respiratory_Complex_I<br>icw(1);NADH_ubiquinone_oxidoreduc<br>tase         |
| fig 6666666.28482.peg.15 | Contig_1 | 15465 | 15088 | - | NADH ubiquinone<br>oxidoreductase chain A<br>(EC 1.6.5.3) | FIG00000558 | icw(4);Respiratory_Complex_I<br>icw(4);NADH_ubiquinone_oxidoreduc<br>tase         |
| fig 6666666.28482.peg.16 | Contig_1 | 16130 | 15729 | - | Probable response<br>regulator                            | FIG01378529 | ff                                                                                |
| fig 6666666.28482.peg.17 | Contig_1 | 16696 | 16160 | - | FIG00824964:<br>hypothetical protein                      | FIG00824962 | ff                                                                                |
| fig 6666666.28482.peg.18 | Contig_1 | 17132 | 16731 | - | FIG00821985:<br>hypothetical protein                      | FIG00821981 | ff                                                                                |
| fig 6666666.28482.peg.19 | Contig_1 | 17542 | 17201 | - | FIG00825230:<br>hypothetical protein                      | FIG00825229 | ff                                                                                |
| fig 6666666.28482.peg.20 | Contig_1 | 18537 | 17539 | - | FIG00823333:<br>hypothetical protein                      | FIG00823332 | ff                                                                                |
| fig 6666666.28482.peg.21 | Contig_1 | 19772 | 18534 | - | Isovaleryl-CoA<br>dehydrogenase (EC<br>1.3.99.10)         | FIG00138712 | icw(1);HMG_CoA_Synthesis<br>icw(1);Leucine_Degradation_and_HM<br>G-CoA_Metabolism |
| fig 6666666.28482.peg.22 | Contig_1 | 20392 | 19775 | - | Transcriptional regulator,<br>TetR family                 | FIG00554417 | ff                                                                                |

|                          |          |       |       |   |                                                                     |             |                                                                                                                                                                                                                        |
|--------------------------|----------|-------|-------|---|---------------------------------------------------------------------|-------------|------------------------------------------------------------------------------------------------------------------------------------------------------------------------------------------------------------------------|
| fig 6666666.28482.peg.23 | Contig_1 | 21288 | 20392 | - | Hydroxymethylglutaryl-CoA lyase (EC 4.1.3.4)                        | FIG00000963 | idu(2);HMG_CoA_Synthesis<br>idu(2);Leucine_Degradation_and_HMG-CoA_Metabolism                                                                                                                                          |
| fig 6666666.28482.peg.24 | Contig_1 | 22484 | 21285 | - | L-carnitine dehydratase/bile acid-inducible protein F (EC 2.8.3.16) | FIG00450481 | ff                                                                                                                                                                                                                     |
| fig 6666666.28482.peg.25 | Contig_1 | 23656 | 22481 | - | FIG00822874: hypothetical protein                                   | FIG00822872 | ff                                                                                                                                                                                                                     |
| fig 6666666.28482.peg.26 | Contig_1 | 24747 | 23656 | - | Homogentisate 1,2-dioxygenase (EC 1.13.11.5)                        | FIG00001172 | isu;Homogentisate_pathway_of_aromatic_compound_degradation<br>isu;Pterin_carbinolamine_dehydratase                                                                                                                     |
| fig 6666666.28482.peg.27 | Contig_1 | 25968 | 25012 | - | Alcohol dehydrogenase (EC 1.1.1.1)                                  | FIG01007502 | idu(17);Glycerolipid_and_Glycerophospholipid_Metabolism_in_Bacteria<br>idu(17);Fermentations:_Mixed_acid<br>icw(1);Butanol_Biosynthesis                                                                                |
| fig 6666666.28482.peg.28 | Contig_1 | 26120 | 26641 | + | GCN5-related N-acetyltransferase                                    |             |                                                                                                                                                                                                                        |
| fig 6666666.28482.peg.29 | Contig_1 | 27839 | 26634 | - | Probable acyl-CoA dehydrogenase (EC 1.3.99.3)                       | FIG01304408 | icw(1);Isoleucine_degradation<br>icw(1);Valine_degradation                                                                                                                                                             |
| fig 6666666.28482.peg.30 | Contig_1 | 29281 | 27872 | - | Butyryl-CoA dehydrogenase (EC 1.3.99.2)                             | FIG00009149 | idu(39);Isoleucine_degradation<br>idu(39);Lysine_fermentation<br>idu(39);Butanol_Biosynthesis<br>idu(39);Acetyl-CoA_fermentation_to_Butyrate<br>idu(39);Valine_degradation<br>idu(39);Anaerobic_respiratory_reductases |

|                          |          |       |       |   |                                                                                    |             |                                                                           |
|--------------------------|----------|-------|-------|---|------------------------------------------------------------------------------------|-------------|---------------------------------------------------------------------------|
| fig 6666666.28482.peg.31 | Contig_1 | 30150 | 29371 | - | Histidinol-phosphatase [alternative form] (EC 3.1.3.15)                            | FIG00001748 | idu(1);Histidine_Biosynthesis                                             |
| fig 6666666.28482.peg.32 | Contig_1 | 30173 | 30502 | + | FIG00820561: hypothetical protein                                                  | FIG01314374 | ff                                                                        |
| fig 6666666.28482.peg.33 | Contig_1 | 31678 | 30506 | - | PPE family protein                                                                 | FIG00013075 | idu(57);CBSS-164757.7.peg.5020                                            |
| fig 6666666.28482.peg.34 | Contig_1 | 32079 | 32870 | + | Universal stress protein family                                                    | FIG00017615 | ff                                                                        |
| fig 6666666.28482.peg.35 | Contig_1 | 32893 | 33531 | + | Two component transcriptional regulatory protein DevR                              | FIG01330944 | ff                                                                        |
| fig 6666666.28482.peg.36 | Contig_1 | 34911 | 33541 | - | Ferredoxin--NADP(+) reductase, actinobacterial (eukaryote-like) type (EC 1.18.1.2) | FIG00134403 | isu;Inorganic_Sulfur_Assimilation                                         |
| fig 6666666.28482.peg.37 | Contig_1 | 35052 | 36170 | + | Peptide chain release factor 2                                                     | FIG01255877 | isu;Programmed_frameshift icw(1);Translation_termination_factor_bacterial |
| fig 6666666.28482.peg.38 | Contig_1 | 36160 | 37155 | + | Potassium efflux system KefA protein / Small-conductance mechanosensitive channel  | FIG00021330 | isu;Potassium_homeostasis                                                 |
| fig 6666666.28482.peg.39 | Contig_1 | 37152 | 37631 | + | FIG01258542: hypothetical protein                                                  | FIG01258536 | ff                                                                        |
| fig 6666666.28482.peg.40 | Contig_1 | 37675 | 38364 | + | Cell division transporter, ATP-binding protein FtsE (TC 3.A.5.1.1)                 | FIG00002914 | isu;Bacterial_Cell_Division                                               |

|                          |          |       |       |   |                                         |             |                                                                                                                                                                                                                        |
|--------------------------|----------|-------|-------|---|-----------------------------------------|-------------|------------------------------------------------------------------------------------------------------------------------------------------------------------------------------------------------------------------------|
| fig 6666666.28482.peg.41 | Contig_1 | 38365 | 39258 | + | Cell division protein FtsX              | FIG00000552 | icw(1);Bacterial_Cell_Division                                                                                                                                                                                         |
| fig 6666666.28482.peg.42 | Contig_1 | 39261 | 39770 | + | tmRNA-binding protein SmpB              | FIG00000194 | isu;Staphylococcal_pathogenicity_islands_SaPI<br>isu;Heat_shock_dnaK_gene_cluster_extended<br>isu;Translation_termination_factors_bacterial                                                                            |
| fig 6666666.28482.peg.43 | Contig_1 | 39824 | 40612 | + | FIG00827717:<br>hypothetical protein    | FIG00827706 | ff                                                                                                                                                                                                                     |
| fig 6666666.28482.peg.44 | Contig_1 | 40646 | 41491 | + | FIG00822482:<br>hypothetical protein    | FIG00822481 | ff                                                                                                                                                                                                                     |
| fig 6666666.28482.peg.45 | Contig_1 | 41640 | 42602 | + | hypothetical protein                    |             |                                                                                                                                                                                                                        |
| fig 6666666.28482.peg.46 | Contig_1 | 44283 | 43282 | - | putative oxidoreductase                 |             |                                                                                                                                                                                                                        |
| fig 6666666.28482.peg.47 | Contig_1 | 44366 | 45667 | + | Butyryl-CoA dehydrogenase (EC 1.3.99.2) | FIG00009149 | idu(39);Isoleucine_degradation<br>idu(39);Lysine_fermentation<br>idu(39);Butanol_Biosynthesis<br>idu(39);Acetyl-CoA_fermentation_to_Butyrate<br>idu(39);Valine_degradation<br>idu(39);Anaerobic_respiratory_reductions |
| fig 6666666.28482.peg.48 | Contig_1 | 45651 | 46247 | + | hypothetical protein                    |             |                                                                                                                                                                                                                        |
| fig 6666666.28482.peg.49 | Contig_1 | 46244 | 47275 | + | phosphotransferase                      |             |                                                                                                                                                                                                                        |
| fig 6666666.28482.peg.50 | Contig_1 | 47272 | 48036 | + | short-chain dehydrogenase/reductase SDR |             |                                                                                                                                                                                                                        |
| fig 6666666.28482.peg.51 | Contig_1 | 48129 | 48001 | - | hypothetical protein                    |             |                                                                                                                                                                                                                        |
| fig 6666666.28482.peg.52 | Contig_1 | 48199 | 48666 | + | hypothetical protein                    |             |                                                                                                                                                                                                                        |

|                          |          |       |       |   |                                   |             |                                                                                                                                                                                                                                                                                                                                              |
|--------------------------|----------|-------|-------|---|-----------------------------------|-------------|----------------------------------------------------------------------------------------------------------------------------------------------------------------------------------------------------------------------------------------------------------------------------------------------------------------------------------------------|
| fig 6666666.28482.peg.53 | Contig_1 | 48765 | 49559 | + | Enoyl-CoA hydratase (EC 4.2.1.17) | FIG00033206 | idu(51);n-Phenylalkanoic_acid_degradation<br>idu(51);Polyhydroxybutyrate_metabolism<br>icw(1);Isoleucine_degradation<br>idu(51);Fatty_acid_metabolism_cluster<br>icw(1);Lysine_fermentation<br>icw(1);Butanol_Biosynthesis<br>icw(1);Acetyl-CoA_fermentation_to_Butyrate<br>icw(1);Valine_degradation<br>idu(51);Butyrate_metabolism_cluster |
| fig 6666666.28482.peg.54 | Contig_1 | 49585 | 50493 | + | Membrane protein, putative        | FIG01030897 | ff                                                                                                                                                                                                                                                                                                                                           |
| fig 6666666.28482.peg.55 | Contig_1 | 52075 | 50480 | - | hypothetical protein              | FIG00638284 | ff                                                                                                                                                                                                                                                                                                                                           |
| fig 6666666.28482.peg.56 | Contig_1 | 52389 | 52249 | - | hypothetical protein              |             |                                                                                                                                                                                                                                                                                                                                              |

|                          |          |       |       |   |                                                                                                                                                                                                                                                                                                                                                                                                                                                                                                                                                                                                                      |
|--------------------------|----------|-------|-------|---|----------------------------------------------------------------------------------------------------------------------------------------------------------------------------------------------------------------------------------------------------------------------------------------------------------------------------------------------------------------------------------------------------------------------------------------------------------------------------------------------------------------------------------------------------------------------------------------------------------------------|
| fig 6666666.28482.peg.57 | Contig_1 | 52280 | 53470 | + | (MTCY164.08c), len: 436. FIG01316343 ff<br>Esterase/lipase, identical<br>to TR:P77909<br>(EMBL:U76006)<br>ESTERASE/LIPASE (EC<br>3.1.1.3)<br>(TRIACYLGLYCEROL<br>LIPASE) (437 aa); N-<br>terminal similar to N-<br>terminal of M.<br>tuberculosis PE family<br>members, eg<br>Y03A_MYCTU Q10637<br>hypothetical glycine-rich<br>49.6 kd pro (603 aa),<br>fasta scores, opt: 334 E():<br>4.8e-13, (43.4% identity<br>in 152 aa overlap). Other<br>relatives include<br>MTCY1A11.25c, 7.8e-14;<br>MTCY21B4.13c, 2.4e-12;<br>MTCY270.06, 5.4e-12;<br>MTCY359.33, 1.2e-11;<br>MTC1A11.04, 1.2e-11;<br>cY130.seq, 1.3e-11 |
| fig 6666666.28482.peg.58 | Contig_1 | 54095 | 53613 | - | Transcriptional regulator, FIG00906075 ff<br>HxIR family                                                                                                                                                                                                                                                                                                                                                                                                                                                                                                                                                             |
| fig 6666666.28482.peg.59 | Contig_1 | 54176 | 55300 | + | Pigment protein FIG00549183 ff                                                                                                                                                                                                                                                                                                                                                                                                                                                                                                                                                                                       |
| fig 6666666.28482.peg.60 | Contig_1 | 55297 | 56262 | + | putative oxidoreductase FIG00945653 ff                                                                                                                                                                                                                                                                                                                                                                                                                                                                                                                                                                               |

|                          |          |       |       |   |                                                                    |             |                                                                                                                                                                            |
|--------------------------|----------|-------|-------|---|--------------------------------------------------------------------|-------------|----------------------------------------------------------------------------------------------------------------------------------------------------------------------------|
| fig 6666666.28482.peg.61 | Contig_1 | 56266 | 57282 | + | conserved hypothetical<br>NADP-dependent<br>oxidoreductase         |             |                                                                                                                                                                            |
| fig 6666666.28482.peg.62 | Contig_1 | 57678 | 57496 | - | hypothetical protein                                               |             |                                                                                                                                                                            |
| fig 6666666.28482.peg.63 | Contig_1 | 57715 | 59424 | + | N-acetylmuramic acid 6-<br>phosphate etherase (EC<br>4.2.-.-)      | FIG00001103 | isu;Recycling_of_Peptidoglycan_Amin<br>o_Sugars isu;UDP-N-<br>acetylmuramate_from_Fructose-6-<br>phosphate_Biosynthesis                                                    |
| fig 6666666.28482.peg.64 | Contig_1 | 59542 | 59405 | - | hypothetical protein                                               |             |                                                                                                                                                                            |
| fig 6666666.28482.peg.65 | Contig_1 | 59525 | 61012 | + | Beta-lactamase class C<br>and other penicillin<br>binding proteins | FIG00000681 | idu(2);Beta-lactamase                                                                                                                                                      |
| fig 6666666.28482.peg.66 | Contig_1 | 61715 | 61020 | - | hypothetical protein                                               |             |                                                                                                                                                                            |
| fig 6666666.28482.peg.67 | Contig_1 | 61900 | 62256 | + | hypothetical protein                                               |             |                                                                                                                                                                            |
| fig 6666666.28482.peg.68 | Contig_1 | 64139 | 62283 | - | Potassium channel<br>protein                                       | FIG00006661 | idu(2);Potassium_homeostasis                                                                                                                                               |
| fig 6666666.28482.peg.69 | Contig_1 | 64345 | 65781 | + | Glutamine synthetase<br>type I (EC 6.3.1.2)                        | FIG00134889 | idu(2);Glutamine,_Glutamate,_Aspart<br>ate_and_Asparagine_Biosynthesis<br>idu(2);Ammonia_assimilation<br>idu(2);Glutamine_synthetases<br>idu(2);Peptidoglycan_Biosynthesis |
| fig 6666666.28482.peg.70 | Contig_1 | 66471 | 65788 | - | hypothetical protein                                               |             |                                                                                                                                                                            |
| fig 6666666.28482.peg.71 | Contig_1 | 66861 | 66484 | - | hypothetical protein                                               |             |                                                                                                                                                                            |
| fig 6666666.28482.peg.72 | Contig_1 | 67741 | 67145 | - | conserved hypothetical<br>secreted protein                         |             |                                                                                                                                                                            |
| fig 6666666.28482.peg.73 | Contig_1 | 67869 | 68102 | + | hypothetical protein                                               |             |                                                                                                                                                                            |
| fig 6666666.28482.peg.74 | Contig_1 | 68768 | 68106 | - | conserved hypothetical<br>regulatory protein                       |             |                                                                                                                                                                            |

|                          |          |       |       |   |                                                             |             |                                                                                                                                                                             |
|--------------------------|----------|-------|-------|---|-------------------------------------------------------------|-------------|-----------------------------------------------------------------------------------------------------------------------------------------------------------------------------|
| fig 6666666.28482.peg.75 | Contig_1 | 69583 | 68891 | - | conserved hypothetical regulatory protein                   | FIG00830769 | ff                                                                                                                                                                          |
| fig 6666666.28482.peg.76 | Contig_1 | 69779 | 69892 | + | hypothetical protein                                        |             |                                                                                                                                                                             |
| fig 6666666.28482.peg.77 | Contig_1 | 69978 | 70373 | + | hypothetical protein                                        |             |                                                                                                                                                                             |
| fig 6666666.28482.peg.78 | Contig_1 | 70370 | 71197 | + | Probable F420-dependent oxidoreductase family protein       | FIG01361662 | ff                                                                                                                                                                          |
| fig 6666666.28482.peg.79 | Contig_1 | 72690 | 71218 | - | flavin-containing monooxygenase (putative secreted protein) |             |                                                                                                                                                                             |
| fig 6666666.28482.peg.80 | Contig_1 | 74175 | 72727 | - | Aldehyde dehydrogenase (EC 1.2.1.3)                         | FIG01292786 | idu(16);Pyruvate_metabolism_II:_acetyl-CoA,_acetogenesis_from_pyruvate idu(16);Glycerolipid_and_Glycerophospholipid_Metabolism_in_Bacteria idu(16);Methylglyoxal_Metabolism |
| fig 6666666.28482.peg.81 | Contig_1 | 74981 | 74172 | - | 4-carboxymuconolactone decarboxylase (EC 4.1.1.44)          | FIG01304850 | idu(2);Protocatechuate_branch_of_beta-ketoadipate_pathway                                                                                                                   |
| fig 6666666.28482.peg.82 | Contig_1 | 75756 | 75007 | - | 3-oxoacyl-[acyl-carrier protein] reductase (EC 1.1.1.100)   | FIG00621114 | idu(38);CBSS-246196.1.peg.364 idu(38);CBSS-164757.7.peg.5020 idu(38);Fatty_Acid_Biosynthesis_FASII                                                                          |
| fig 6666666.28482.peg.83 | Contig_1 | 76643 | 75813 | - | oxidoreductase, short chain dehydrogenase-reductase family  | FIG01348516 | ff                                                                                                                                                                          |

|                          |          |       |       |   |                                                  |             |                                                      |
|--------------------------|----------|-------|-------|---|--------------------------------------------------|-------------|------------------------------------------------------|
| fig 6666666.28482.peg.84 | Contig_1 | 76688 | 77281 | + | Transcriptional regulator, TetR family           | FIG00554417 | ff                                                   |
| fig 6666666.28482.peg.85 | Contig_1 | 78746 | 77283 | - | Selenoprotein O and cysteine-containing homologs | FIG00004562 | isu;Selenoprotein_O                                  |
| fig 6666666.28482.peg.86 | Contig_1 | 79356 | 78775 | - | hypothetical protein                             |             |                                                      |
| fig 6666666.28482.peg.87 | Contig_1 | 79769 | 79488 | - | hypothetical protein                             |             |                                                      |
| fig 6666666.28482.peg.88 | Contig_1 | 79955 | 80764 | + | hypothetical protein                             |             |                                                      |
| fig 6666666.28482.peg.89 | Contig_1 | 80825 | 81760 | + | Citrate lyase beta chain (EC 4.1.3.6)            | FIG00010100 | idu(2);Citrate_Metabolism,_Transport,_and_Regulation |
| fig 6666666.28482.peg.90 | Contig_1 | 81772 | 82488 | + | FIG00829307: hypothetical protein                | FIG00829303 | ff                                                   |
| fig 6666666.28482.peg.91 | Contig_1 | 83706 | 82450 | - | FIG029007: hypothetical protein                  | FIG01369934 | ff                                                   |
| fig 6666666.28482.peg.92 | Contig_1 | 83754 | 84110 | + | FIG016027: protein of unknown function YeaO      | FIG01310523 | ff                                                   |
| fig 6666666.28482.peg.93 | Contig_1 | 84112 | 84984 | + | FIG00995258: hypothetical protein                | FIG00995257 | ff                                                   |
| fig 6666666.28482.peg.94 | Contig_1 | 84999 | 85628 | + | FIG00822523: hypothetical protein                | FIG00822519 | ff                                                   |
| fig 6666666.28482.peg.95 | Contig_1 | 86005 | 85637 | - | Protein CrcB homolog 2                           | FIG00820613 | ff                                                   |
| fig 6666666.28482.peg.96 | Contig_1 | 86400 | 86002 | - | Protein CrcB homolog 1                           | FIG01322783 | ff                                                   |
| fig 6666666.28482.peg.97 | Contig_1 | 86482 | 88110 | + | Phosphoglucomutase (EC 5.4.2.2)                  | FIG00000901 | ff                                                   |
| fig 6666666.28482.peg.98 | Contig_1 | 88203 | 89333 | + | Multidrug resistance protein B                   | FIG01356213 | ff                                                   |
| fig 6666666.28482.rna.1  | Contig_1 | 89390 | 89462 | + | tRNA-Ala-GGC                                     |             | isu;tRNAs                                            |
| fig 6666666.28482.peg.99 | Contig_1 | 89990 | 91144 | + | Putative uncharacterized protein BCG_3873        | FIG00994577 | ff                                                   |

|                           |          |        |        |   |                                                                                                  |             |                                                                                                                                                                                           |
|---------------------------|----------|--------|--------|---|--------------------------------------------------------------------------------------------------|-------------|-------------------------------------------------------------------------------------------------------------------------------------------------------------------------------------------|
| fig 6666666.28482.peg.100 | Contig_1 | 92223  | 91165  | - | putative cytochrome P450 hydroxylase                                                             | FIG00032437 | idu(49);Nitric_oxide_synthase                                                                                                                                                             |
| fig 6666666.28482.peg.101 | Contig_1 | 93210  | 92557  | - | Putative secreted protein                                                                        | FIG01353358 | ff                                                                                                                                                                                        |
| fig 6666666.28482.peg.102 | Contig_1 | 94905  | 93499  | - | Adenylate cyclase (EC 4.6.1.1)                                                                   | FIG00001294 | idu(25);cAMP_signaling_in_bacteria                                                                                                                                                        |
| fig 6666666.28482.peg.103 | Contig_1 | 95228  | 95398  | + | hypothetical protein                                                                             |             |                                                                                                                                                                                           |
| fig 6666666.28482.peg.104 | Contig_1 | 95930  | 95445  | - | Transcriptional regulator, MarR family                                                           |             |                                                                                                                                                                                           |
| fig 6666666.28482.peg.105 | Contig_1 | 96026  | 96649  | + | reductase                                                                                        |             |                                                                                                                                                                                           |
| fig 6666666.28482.peg.106 | Contig_1 | 96715  | 97614  | + | hypothetical protein                                                                             | FIG00638284 | ff                                                                                                                                                                                        |
| fig 6666666.28482.peg.107 | Contig_1 | 97595  | 98335  | + | 3-oxoacyl-[acyl-carrier protein] reductase (EC 1.1.1.100)                                        | FIG00621114 | idu(38);CBSS-246196.1.peg.364<br>idu(38);CBSS-164757.7.peg.5020<br>idu(38);Fatty_Acid_Biosynthesis_FASI<br>I                                                                              |
| fig 6666666.28482.peg.108 | Contig_1 | 99218  | 98397  | - | 5-valerolactone hydrolase                                                                        | FIG00968451 | ff                                                                                                                                                                                        |
| fig 6666666.28482.peg.109 | Contig_1 | 100686 | 99277  | - | Aldehyde dehydrogenase (EC 1.2.1.3)                                                              | FIG01292786 | idu(16);Pyruvate_metabolism_II:_ace<br>tyl-<br>CoA,_acetogenesis_from_pyruvate<br>idu(16);Glycerolipid_and_Glycerophospholipid_Metabolism_in_Bacteria<br>idu(16);Methylglyoxal_Metabolism |
| fig 6666666.28482.peg.110 | Contig_1 | 100782 | 102047 | + | Phenylpropionate dioxygenase and related ring-hydroxylating dioxygenases, large terminal subunit | FIG01371907 | ff                                                                                                                                                                                        |

|                           |          |        |        |   |                                                                                                  |             |                                                                                                         |
|---------------------------|----------|--------|--------|---|--------------------------------------------------------------------------------------------------|-------------|---------------------------------------------------------------------------------------------------------|
| fig 6666666.28482.peg.111 | Contig_1 | 102044 | 102382 | + | FIG00821688:<br>hypothetical protein                                                             | FIG00821687 | ff                                                                                                      |
| fig 6666666.28482.peg.112 | Contig_1 | 102451 | 103626 | + | amidohydrolase                                                                                   |             |                                                                                                         |
| fig 6666666.28482.peg.113 | Contig_1 | 103623 | 104099 | + | Transcriptional regulator, MarR family                                                           | FIG00554610 | ff                                                                                                      |
| fig 6666666.28482.peg.114 | Contig_1 | 104175 | 104474 | + | Probable phenylacetic acid degradation NADH oxidoreductase paaE (EC 1.-.-.)                      | FIG01355358 | ff                                                                                                      |
| fig 6666666.28482.peg.115 | Contig_1 | 104510 | 105214 | + | 3-oxoacyl-[acyl-carrier protein] reductase (EC 1.1.1.100)                                        | FIG00621114 | idu(38);CBSS-246196.1.peg.364<br>idu(38);CBSS-164757.7.peg.5020<br>idu(38);Fatty_Acid_Biosynthesis_FASI |
| fig 6666666.28482.peg.116 | Contig_1 | 105257 | 106525 | + | Phenylpropionate dioxygenase and related ring-hydroxylating dioxygenases, large terminal subunit | FIG01371907 | ff                                                                                                      |
| fig 6666666.28482.peg.117 | Contig_1 | 106528 | 106863 | + | FIG00822032:<br>hypothetical protein                                                             | FIG00822031 | ff                                                                                                      |
| fig 6666666.28482.peg.118 | Contig_1 | 106903 | 107748 | + | Taurine catabolism dioxygenase TauD/TfdA                                                         | FIG00822811 | ff                                                                                                      |
| fig 6666666.28482.peg.119 | Contig_1 | 107761 | 108072 | + | conserved hypothetical protein                                                                   |             |                                                                                                         |
| fig 6666666.28482.peg.120 | Contig_1 | 108995 | 108120 | - | Transcriptional regulator, lclR family                                                           | FIG00022569 | idu(12);Homogentisate_pathway_of_aromatic_compound_degradation                                          |
| fig 6666666.28482.peg.121 | Contig_1 | 109082 | 110026 | + | Short chain dehydrogenase                                                                        | FIG01310822 | ff                                                                                                      |
| fig 6666666.28482.peg.122 | Contig_1 | 110023 | 110826 | + | FIG00820258:<br>hypothetical protein                                                             | FIG01126297 | ff                                                                                                      |

|                           |          |        |        |   |                                                                 |             |                                                                                                              |
|---------------------------|----------|--------|--------|---|-----------------------------------------------------------------|-------------|--------------------------------------------------------------------------------------------------------------|
| fig 6666666.28482.peg.123 | Contig_1 | 110833 | 112047 | + | FIG00830454:<br>hypothetical protein                            | FIG01129856 | ff                                                                                                           |
| fig 6666666.28482.peg.124 | Contig_1 | 112062 | 113342 | + | FIG00829067:<br>hypothetical protein                            | FIG01126475 | ff                                                                                                           |
| fig 6666666.28482.peg.125 | Contig_1 | 116423 | 113355 | - | hypothetical protein                                            | FIG00638284 | ff                                                                                                           |
| fig 6666666.28482.peg.126 | Contig_1 | 117750 | 116599 | - | PPE family protein                                              | FIG00013075 | icw(1);CBSS-164757.7.peg.5020                                                                                |
| fig 6666666.28482.peg.127 | Contig_1 | 118339 | 118058 | - | FIG00826766:<br>hypothetical protein                            | FIG00826765 | ff                                                                                                           |
| fig 6666666.28482.peg.128 | Contig_1 | 118441 | 119937 | + | PE family protein                                               |             | ff                                                                                                           |
| fig 6666666.28482.peg.129 | Contig_1 | 119948 | 120754 | + | 3-oxoacyl-[acyl-carrier<br>protein] reductase (EC<br>1.1.1.100) | FIG00621114 | idu(38);CBSS-246196.1.peg.364<br>idu(38);CBSS-164757.7.peg.5020<br>idu(38);Fatty_Acid_Biosynthesis_FASI<br>I |
| fig 6666666.28482.peg.130 | Contig_1 | 123278 | 120759 | - | Glycogen phosphorylase<br>(EC 2.4.1.1)                          | FIG00000476 | idu(1);Glycogen_metabolism<br>idu(1);Maltose_and_Maltodextrin_Ut<br>ilization                                |
| fig 6666666.28482.peg.131 | Contig_1 | 124265 | 123426 | - | hypothetical protein                                            | FIG00638284 | ff                                                                                                           |
| fig 6666666.28482.peg.132 | Contig_1 | 124435 | 125931 | + | hypothetical protein                                            | FIG00638284 | ff                                                                                                           |
| fig 6666666.28482.peg.133 | Contig_1 | 128294 | 125928 | - | Transmembrane<br>transport protein<br>MmpL13b                   | FIG01314334 | ff                                                                                                           |
| fig 6666666.28482.peg.134 | Contig_1 | 128546 | 128980 | + | Transcriptional regulator,<br>TetR family                       |             |                                                                                                              |
| fig 6666666.28482.peg.135 | Contig_1 | 129732 | 129019 | - | conserved hypothetical<br>secreted protein                      |             |                                                                                                              |
| fig 6666666.28482.peg.136 | Contig_1 | 129789 | 130685 | + | FIG00821214:<br>hypothetical protein                            | FIG00821213 | ff                                                                                                           |
| fig 6666666.28482.peg.137 | Contig_1 | 130727 | 131146 | + | Possible membrane<br>protein                                    | FIG01121868 | ff                                                                                                           |
| fig 6666666.28482.peg.138 | Contig_1 | 131348 | 131103 | - | hypothetical protein                                            |             |                                                                                                              |

|                           |          |        |        |   |                                              |             |                                                                                                                                                                                                                                                                                                                                              |
|---------------------------|----------|--------|--------|---|----------------------------------------------|-------------|----------------------------------------------------------------------------------------------------------------------------------------------------------------------------------------------------------------------------------------------------------------------------------------------------------------------------------------------|
| fig 6666666.28482.peg.139 | Contig_1 | 131492 | 132292 | + | 5-keto-D-gluconate 5-reductase (EC 1.1.1.69) | FIG00001584 | isu;D-gluconate_and_ketogluconates_metabolism                                                                                                                                                                                                                                                                                                |
| fig 6666666.28482.peg.140 | Contig_1 | 132293 | 133237 | + | aminoglycoside phosphotransferase            | FIG00824137 | ff                                                                                                                                                                                                                                                                                                                                           |
| fig 6666666.28482.peg.141 | Contig_1 | 133439 | 133245 | - | hypothetical protein                         |             |                                                                                                                                                                                                                                                                                                                                              |
| fig 6666666.28482.peg.142 | Contig_1 | 133699 | 133559 | - | hypothetical protein                         |             |                                                                                                                                                                                                                                                                                                                                              |
| fig 6666666.28482.peg.143 | Contig_1 | 133656 | 134342 | + | FIG00826132: hypothetical protein            | FIG00826131 | ff                                                                                                                                                                                                                                                                                                                                           |
| fig 6666666.28482.peg.144 | Contig_1 | 135637 | 134339 | - | Butyryl-CoA dehydrogenase (EC 1.3.99.2)      | FIG00009149 | idu(39);Isoleucine_degradation<br>idu(39);Lysine_fermentation<br>idu(39);Butanol_Biosynthesis<br>idu(39);Acetyl-CoA_fermentation_to_Butyrate<br>idu(39);Valine_degradation<br>idu(39);Anaerobic_respiratory_reductions                                                                                                                       |
| fig 6666666.28482.peg.145 | Contig_1 | 136436 | 135660 | - | Enoyl-CoA hydratase (EC 4.2.1.17)            | FIG00033206 | idu(51);n-Phenylalkanoic_acid_degradation<br>idu(51);Polyhydroxybutyrate_metabolism<br>icw(1);Isoleucine_degradation<br>idu(51);Fatty_acid_metabolism_cluster<br>icw(1);Lysine_fermentation<br>icw(1);Butanol_Biosynthesis<br>icw(1);Acetyl-CoA_fermentation_to_Butyrate<br>icw(1);Valine_degradation<br>idu(51);Butyrate_metabolism_cluster |
| fig 6666666.28482.peg.146 | Contig_1 | 136753 | 137709 | + | dehydrogenase                                | FIG01007645 | ff                                                                                                                                                                                                                                                                                                                                           |

|                           |          |        |        |   |                                                                                             |             |                                                                                                                                 |
|---------------------------|----------|--------|--------|---|---------------------------------------------------------------------------------------------|-------------|---------------------------------------------------------------------------------------------------------------------------------|
| fig 6666666.28482.peg.147 | Contig_1 | 138534 | 137713 | - | Dehydrogenases with different specificities (related to short-chain alcohol dehydrogenases) | FIG00975245 | ff                                                                                                                              |
| fig 6666666.28482.peg.148 | Contig_1 | 139441 | 138563 | - | Polyphosphate kinase 2 (EC 2.7.4.1)                                                         | FIG00507844 | isu;Polyphosphate                                                                                                               |
| fig 6666666.28482.peg.149 | Contig_1 | 141001 | 139475 | - | FIG00824604: hypothetical protein                                                           | FIG00824603 | ff                                                                                                                              |
| fig 6666666.28482.peg.150 | Contig_1 | 141176 | 141060 | - | hypothetical protein                                                                        |             |                                                                                                                                 |
| fig 6666666.28482.peg.151 | Contig_1 | 141472 | 141173 | - | hypothetical protein                                                                        |             |                                                                                                                                 |
| fig 6666666.28482.peg.152 | Contig_1 | 143833 | 141575 | - | Carbon starvation protein A                                                                 | FIG00001750 | isu;Stress_related_cluster<br>isu;Two-component_sensor_regulator_linked_to_Carbon_Starvation_Protein_A<br>isu;Carbon_Starvation |
| fig 6666666.28482.peg.153 | Contig_1 | 145456 | 143885 | - | ATP-dependent DNA ligase (EC 6.5.1.1)                                                       | FIG00052980 | idu(2);DNA_replication,_archaeal<br>idu(2);DNA_Repair_Base_Excision<br>idu(2);DNA_ligases                                       |
| fig 6666666.28482.peg.154 | Contig_1 | 145549 | 146307 | + | 3-hydroxyacyl-CoA dehydrogenase type II (EC 1.1.1.35)                                       | FIG01073099 | ff                                                                                                                              |
| fig 6666666.28482.peg.155 | Contig_1 | 146417 | 148594 | + | FadE22                                                                                      | FIG00824887 | ff                                                                                                                              |
| fig 6666666.28482.peg.156 | Contig_1 | 148898 | 148671 | - | FIG00821891: hypothetical protein                                                           | FIG00821889 | ff                                                                                                                              |
| fig 6666666.28482.peg.157 | Contig_1 | 149067 | 150260 | + | Acetyl-CoA acetyltransferase                                                                | FIG01005417 | ff                                                                                                                              |
| fig 6666666.28482.peg.158 | Contig_1 | 150269 | 151717 | + | Transcriptional regulator, GntR family                                                      | FIG00621925 | ff                                                                                                                              |
| fig 6666666.28482.peg.159 | Contig_1 | 151819 | 152823 | + | FIG00823661: hypothetical protein                                                           | FIG00823660 | ff                                                                                                                              |
| fig 6666666.28482.peg.160 | Contig_1 | 153045 | 153518 | + | hypothetical protein                                                                        |             |                                                                                                                                 |

|                           |          |        |        |   |                                                                                             |             |                                                                                                                        |
|---------------------------|----------|--------|--------|---|---------------------------------------------------------------------------------------------|-------------|------------------------------------------------------------------------------------------------------------------------|
| fig 6666666.28482.peg.161 | Contig_1 | 155027 | 153543 | - | Cytochrome P450 136                                                                         | FIG01314131 | ff                                                                                                                     |
| fig 6666666.28482.peg.162 | Contig_1 | 155214 | 155074 | - | hypothetical protein                                                                        |             |                                                                                                                        |
| fig 6666666.28482.peg.163 | Contig_1 | 155227 | 155805 | + | Transcriptional regulator, TetR family                                                      | FIG00554417 | ff                                                                                                                     |
| fig 6666666.28482.peg.164 | Contig_1 | 155824 | 156738 | + | Short chain dehydrogenase                                                                   | FIG01310822 | ff                                                                                                                     |
| fig 6666666.28482.peg.165 | Contig_1 | 157746 | 156700 | - | DNA polymerase-like protein MT3142                                                          | FIG00149033 | isu;DNA_repair,_bacterial                                                                                              |
| fig 6666666.28482.peg.166 | Contig_1 | 158338 | 157736 | - | Transcriptional regulator, TetR family                                                      | FIG00554417 | ff                                                                                                                     |
| fig 6666666.28482.peg.167 | Contig_1 | 158428 | 158985 | + | NADPH:quinone oxidoreductase                                                                | FIG01132576 | ff                                                                                                                     |
| fig 6666666.28482.peg.168 | Contig_1 | 159525 | 159764 | + | Glutaredoxin-like protein NrdH, required for reduction of Ribonucleotide reductase class Ib | FIG00003291 | isu;Glutathione:_Redox_cycle<br>isu;Ribonucleotide_reduction<br>isu;Glutaredoxins                                      |
| fig 6666666.28482.peg.169 | Contig_1 | 159805 | 160314 | + | Ribonucleotide reduction protein NrdI                                                       | FIG00001039 | icw(2);Ribonucleotide_reduction                                                                                        |
| fig 6666666.28482.peg.170 | Contig_1 | 160284 | 163676 | + | Ribonucleotide reductase of class Ib (aerobic), alpha subunit (EC 1.17.4.1)                 | FIG00001069 | icw(1);Ribonucleotide_reduction                                                                                        |
| fig 6666666.28482.peg.171 | Contig_1 | 165258 | 163711 | - | Choline dehydrogenase (EC 1.1.99.1)                                                         | FIG00057416 | idu(4);Choline_uptake_and_conversion_to_betaine_clusters<br>idu(4);Choline_and_Betaine_Uptake_and_Betaine_Biosynthesis |
| fig 6666666.28482.peg.172 | Contig_1 | 165497 | 166399 | + | Putative S-adenosyl-L-methionine-dependent methyltransferase                                |             |                                                                                                                        |
| fig 6666666.28482.peg.173 | Contig_1 | 166771 | 166917 | + | hypothetical protein                                                                        |             |                                                                                                                        |

|                           |          |        |        |   |                                                                            |             |                                                                        |
|---------------------------|----------|--------|--------|---|----------------------------------------------------------------------------|-------------|------------------------------------------------------------------------|
| fig 6666666.28482.peg.174 | Contig_1 | 166914 | 169778 | + | Putative membrane protein                                                  | FIG01056920 | ff                                                                     |
| fig 6666666.28482.peg.175 | Contig_1 | 169816 | 171219 | + | FAD linked oxidase domain protein                                          | FIG00498745 | ff                                                                     |
| fig 6666666.28482.peg.176 | Contig_1 | 172154 | 171333 | - | alpha/beta hydrolase fold-1                                                | FIG00823727 | ff                                                                     |
| fig 6666666.28482.peg.177 | Contig_1 | 172565 | 173353 | + | putative transcriptional regulator, AraC family                            |             |                                                                        |
| fig 6666666.28482.peg.178 | Contig_1 | 173462 | 174148 | + | Transcriptional regulator, TetR family                                     | FIG00554417 | ff                                                                     |
| fig 6666666.28482.peg.179 | Contig_1 | 174264 | 175817 | + | Monooxygenase, flavin-binding family                                       | FIG01367379 | ff                                                                     |
| fig 6666666.28482.peg.180 | Contig_1 | 176687 | 175779 | - | Short-chain dehydrogenase/reductase SDR                                    |             | idu(13);CBSS-164757.7.peg.5020<br>idu(13);Transcription_repair_cluster |
| fig 6666666.28482.peg.181 | Contig_1 | 176789 | 177361 | + | Transcriptional regulator, TetR family                                     | FIG00554417 | ff                                                                     |
| fig 6666666.28482.peg.182 | Contig_1 | 177881 | 177333 | - | Transcriptional regulator, TetR family                                     | FIG00554417 | ff                                                                     |
| fig 6666666.28482.peg.183 | Contig_1 | 178311 | 177865 | - | FIG00821720: hypothetical protein                                          | FIG00821718 | ff                                                                     |
| fig 6666666.28482.peg.184 | Contig_1 | 179925 | 178345 | - | FAD dependent oxidoreductase                                               |             |                                                                        |
| fig 6666666.28482.peg.185 | Contig_1 | 180019 | 180633 | + | Transcriptional regulator, TetR family                                     | FIG00554417 | ff                                                                     |
| fig 6666666.28482.peg.186 | Contig_1 | 180746 | 181720 | + | Ribonucleotide reductase of class Ib (aerobic), beta subunit (EC 1.17.4.1) | FIG00000960 | isu;Ribonucleotide_reduction                                           |
| fig 6666666.28482.peg.187 | Contig_1 | 182017 | 183054 | + | FOG: GGDEF domain                                                          |             |                                                                        |
| fig 6666666.28482.peg.188 | Contig_1 | 183051 | 183581 | + | hypothetical protein                                                       |             |                                                                        |
| fig 6666666.28482.peg.189 | Contig_1 | 183885 | 183649 | - | hypothetical protein                                                       |             |                                                                        |

|                           |          |        |        |   |                                                                                                                                   |             |                                                                                                                                          |
|---------------------------|----------|--------|--------|---|-----------------------------------------------------------------------------------------------------------------------------------|-------------|------------------------------------------------------------------------------------------------------------------------------------------|
| fig 6666666.28482.peg.190 | Contig_1 | 184037 | 184249 | + | hypothetical protein                                                                                                              |             |                                                                                                                                          |
| fig 6666666.28482.peg.191 | Contig_1 | 184465 | 184881 | + | FIG00822200:                                                                                                                      | FIG00822199 | ff                                                                                                                                       |
| fig 6666666.28482.peg.192 | Contig_1 | 185910 | 184870 | - | hypothetical protein<br>Cinnamyl alcohol<br>dehydrogenase/reductas<br>e (EC 1.1.1.195) @<br>Alcohol dehydrogenase<br>(EC 1.1.1.1) |             | idu(17);Glycerolipid_and_Glycerophospholipid_Metabolism_in_Bacteria<br>idu(17);Fermentations:_Mixed_acid<br>idu(17);Butanol_Biosynthesis |
| fig 6666666.28482.peg.193 | Contig_1 | 187059 | 185989 | - | Iron(III) dicitrate<br>transport system,<br>periplasmic iron-binding<br>protein FecB (TC<br>3.A.1.14.1)                           | FIG00054285 | ff                                                                                                                                       |
| fig 6666666.28482.peg.194 | Contig_1 | 187223 | 188983 | + | Cytochrome c oxidase<br>polypeptide I (EC 1.9.3.1)                                                                                | FIG00132629 | isu;Terminal_cytochrome_C_oxidases                                                                                                       |
| fig 6666666.28482.peg.195 | Contig_1 | 188999 | 190234 | + | Phosphoserine<br>phosphatase (EC 3.1.3.3)                                                                                         | FIG00000149 | idu(3);CBSS-336982.3.peg.3874<br>idu(3);Serine_Biosynthesis                                                                              |
| fig 6666666.28482.peg.196 | Contig_1 | 190287 | 191162 | + | ABC transporter ATP-<br>binding protein                                                                                           | FIG01956052 | ff                                                                                                                                       |
| fig 6666666.28482.peg.197 | Contig_1 | 191159 | 191992 | + | FIG00996530:<br>hypothetical protein                                                                                              | FIG00996529 | ff                                                                                                                                       |

|                           |          |        |        |   |                                                |             |                                                                                                                                                                                                                                                                                                                                                   |
|---------------------------|----------|--------|--------|---|------------------------------------------------|-------------|---------------------------------------------------------------------------------------------------------------------------------------------------------------------------------------------------------------------------------------------------------------------------------------------------------------------------------------------------|
| fig 6666666.28482.peg.198 | Contig_1 | 191980 | 192672 | + | Enoyl-CoA hydratase (EC 4.2.1.17)              | FIG00033206 | idu(51);n-Phenylalkanoic_acid_degradation<br>idu(51);Polyhydroxybutyrate_metabolism<br>idu(51);Isoleucine_degradation<br>idu(51);Fatty_acid_metabolism_cluster<br>idu(51);Lysine_fermentation<br>idu(51);Butanol_Biosynthesis<br>idu(51);Acetyl-CoA_fermentation_to_Butyrate<br>idu(51);Valine_degradation<br>idu(51);Butyrate_metabolism_cluster |
| fig 6666666.28482.peg.199 | Contig_1 | 192683 | 193666 | + | Methyltransferase domain                       | FIG00995955 | ff                                                                                                                                                                                                                                                                                                                                                |
| fig 6666666.28482.peg.200 | Contig_1 | 193706 | 194902 | + | Methyltransferase (EC 2.1.1.-)                 | FIG00515945 | ff                                                                                                                                                                                                                                                                                                                                                |
| fig 6666666.28482.peg.201 | Contig_1 | 194960 | 195655 | + | Possible membrane protein                      | FIG01121868 | ff                                                                                                                                                                                                                                                                                                                                                |
| fig 6666666.28482.peg.202 | Contig_1 | 196077 | 195739 | - | FIG00822582: hypothetical protein              | FIG00822580 | ff                                                                                                                                                                                                                                                                                                                                                |
| fig 6666666.28482.peg.203 | Contig_1 | 197396 | 196074 | - | FIG00995884: hypothetical protein              | FIG00820108 | ff                                                                                                                                                                                                                                                                                                                                                |
| fig 6666666.28482.peg.204 | Contig_1 | 197486 | 198223 | + | Galactoside O-acetyltransferase (EC 2.3.1.18)  | FIG00139238 | isu;Lactose_utilization                                                                                                                                                                                                                                                                                                                           |
| fig 6666666.28482.peg.205 | Contig_1 | 198772 | 198230 | - | FIG00820106: hypothetical protein              | FIG00820103 | ff                                                                                                                                                                                                                                                                                                                                                |
| fig 6666666.28482.peg.206 | Contig_1 | 200187 | 198856 | - | Deoxyribodipyrimidine photolyase (EC 4.1.99.3) | FIG00000633 | isu;DNA_repair,_bacterial_photolyase<br>isu;EC699-706                                                                                                                                                                                                                                                                                             |

|                           |          |        |        |   |                                                                     |             |                                                                              |
|---------------------------|----------|--------|--------|---|---------------------------------------------------------------------|-------------|------------------------------------------------------------------------------|
| fig 6666666.28482.peg.207 | Contig_1 | 200670 | 200191 | - | tryptophan-rich sensory protein                                     | FIG01211525 | ff                                                                           |
| fig 6666666.28482.peg.208 | Contig_1 | 200834 | 200667 | - | FIG00821761: hypothetical protein                                   | FIG00821760 | ff                                                                           |
| fig 6666666.28482.peg.209 | Contig_1 | 200909 | 201382 | + | Transcriptional regulator, MarR family                              | FIG00554610 | ff                                                                           |
| fig 6666666.28482.peg.210 | Contig_1 | 203576 | 201333 | - | Transmembrane transport protein MmpL13b                             | FIG01314334 | ff                                                                           |
| fig 6666666.28482.peg.211 | Contig_1 | 203767 | 204357 | + | hypothetical protein                                                | FIG00638284 | ff                                                                           |
| fig 6666666.28482.peg.212 | Contig_1 | 204360 | 204863 | + | TspO and MBR like proteins                                          |             |                                                                              |
| fig 6666666.28482.peg.213 | Contig_1 | 204860 | 205906 | + | Isopentenyl-diphosphate delta-isomerase, FMN-dependent (EC 5.3.3.2) | FIG00001120 | isu;Isoprenoid_Biosynthesis<br>isu;Isoprenoid_Biosynthesis:_Interconversions |
| fig 6666666.28482.peg.214 | Contig_1 | 205917 | 207179 | + | glycosyltransferase, putative                                       | FIG01227982 | ff                                                                           |
| fig 6666666.28482.peg.215 | Contig_1 | 207686 | 207144 | - | Transcriptional regulator, MarR family                              | FIG00554610 | ff                                                                           |
| fig 6666666.28482.peg.216 | Contig_1 | 208170 | 207739 | - | putative membrane protein                                           | FIG00672847 | ff                                                                           |
| fig 6666666.28482.peg.217 | Contig_1 | 209210 | 208218 | - | CrtV-methyltransferase-like protein                                 | FIG00121395 | ff                                                                           |
| fig 6666666.28482.peg.218 | Contig_1 | 210715 | 209207 | - | "phi-Carotenoid synthase" (EC 1.3.-.- and EC 2.1.1.-)               | FIG00039628 | ff                                                                           |
| fig 6666666.28482.peg.219 | Contig_1 | 211437 | 210712 | - | CrtT-methyltransferase-like protein                                 | FIG00121578 | ff                                                                           |
| fig 6666666.28482.peg.220 | Contig_1 | 211735 | 211424 | - | Lycopene cyclase                                                    | FIG00117432 | ff                                                                           |

|                           |          |        |        |   |                                                               |             |                                                                                                                                     |
|---------------------------|----------|--------|--------|---|---------------------------------------------------------------|-------------|-------------------------------------------------------------------------------------------------------------------------------------|
| fig 6666666.28482.peg.221 | Contig_1 | 212055 | 211732 | - | Lycopene cyclase                                              | FIG00117432 | ff                                                                                                                                  |
| fig 6666666.28482.peg.222 | Contig_1 | 212993 | 212052 | - | Phytoene synthase (EC 2.5.1.32)                               | FIG00000928 | isu;Protein_deglycation<br>isu;Proteorhodopsin isu;CBSS-320388.3.peg.3759                                                           |
| fig 6666666.28482.peg.223 | Contig_1 | 214519 | 212990 | - | Phytoene dehydrogenase (EC 1.14.99.-)                         | FIG00132544 | icw(1);Protein_deglycation<br>icw(1);Proteorhodopsin                                                                                |
| fig 6666666.28482.peg.224 | Contig_1 | 215592 | 214516 | - | IdsA2_2                                                       |             |                                                                                                                                     |
| fig 6666666.28482.peg.225 | Contig_1 | 216319 | 215840 | - | hypothetical protein                                          |             |                                                                                                                                     |
| fig 6666666.28482.peg.226 | Contig_1 | 216630 | 217304 | + | hypothetical protein                                          |             |                                                                                                                                     |
| fig 6666666.28482.peg.227 | Contig_1 | 218669 | 217314 | - | Cell division inhibitor                                       | FIG00002048 | idu(1);CBSS-83333.1.peg.946<br>idu(1);Persister_Cells                                                                               |
| fig 6666666.28482.peg.228 | Contig_1 | 219924 | 218680 | - | Glycosyl transferase, group 1                                 | FIG00018328 | ff                                                                                                                                  |
| fig 6666666.28482.peg.229 | Contig_1 | 221608 | 220022 | - | Glycogen branching enzyme, GH-57-type, archaeal (EC 2.4.1.18) | FIG00002744 | isu;Glycogen_metabolism                                                                                                             |
| fig 6666666.28482.peg.230 | Contig_1 | 222423 | 221605 | - | Methyltransferase (EC 2.1.1.-)                                | FIG00515945 | ff                                                                                                                                  |
| fig 6666666.28482.peg.231 | Contig_1 | 222652 | 223452 | + | Electron transfer flavoprotein, beta subunit                  | FIG01304886 | isu;Lysine_fermentation isu;Acetyl-CoA_fermentation_to_Butyrates<br>isu;Heme,_hemin_uptake_and_utilization_systems_in_GramNegatives |
| fig 6666666.28482.peg.232 | Contig_1 | 223509 | 224450 | + | Electron transfer flavoprotein, alpha subunit                 | FIG00136866 | icw(1);Lysine_fermentation<br>icw(1);Acetyl-CoA_fermentation_to_Butyrates                                                           |
| fig 6666666.28482.peg.233 | Contig_1 | 224688 | 225545 | + | Putative hemolysin                                            | FIG01004154 | ff                                                                                                                                  |

|                           |           |        |        |   |                                                                 |             |                                                                                                                                                                            |
|---------------------------|-----------|--------|--------|---|-----------------------------------------------------------------|-------------|----------------------------------------------------------------------------------------------------------------------------------------------------------------------------|
| fig 6666666.28482.peg.234 | Contig_1  | 225542 | 226363 | + | 1-acyl-sn-glycerol-3-phosphate<br>acyltransferase (EC 2.3.1.51) | FIG00005243 | idu(6);Glycerolipid_and_Glycerophospholipid_Metabolism_in_Bacteria<br>idu(6);Ribosome_post-transcriptional_modification_and_chromosomal_segregation_cluster                |
| fig 6666666.28482.peg.235 | Contig_1  | 226397 | 227575 | + | Cysteine desulfurase (EC 2.8.1.7)                               | FIG00000001 | idu(2);Iron-sulfur_cluster_assembly<br>idu(2);CBSS-84588.1.peg.1247<br>idu(2);CBSS-393130.3.peg.794<br>idu(2);mnm5U34_biosynthesis_bacteria<br>idu(2);Alanine_biosynthesis |
| fig 6666666.28482.peg.236 | Contig_1  | 227576 | 228652 | + | tRNA-specific 2-thiouridylase MnmA                              | FIG00000626 | isu;RNA_methylation                                                                                                                                                        |
| fig 6666666.28482.peg.237 | Contig_1  | 228798 | 229082 | + | hypothetical protein                                            |             |                                                                                                                                                                            |
| fig 6666666.28482.peg.238 | Contig_1  | 229683 | 229087 | - | Lipoprotein LpqA                                                | FIG01316065 | ff                                                                                                                                                                         |
| fig 6666666.28482.peg.239 | Contig_1  | 229827 | 230846 | + | vitamin-B12 independent methionine synthase family protein      | FIG00543935 | ff                                                                                                                                                                         |
| fig 6666666.28482.peg.240 | Contig_1  | 230911 | 231396 | + | hypothetical protein                                            |             |                                                                                                                                                                            |
| fig 6666666.28482.peg.241 | Contig_1  | 231393 | 231710 | + | Transcriptional regulator, ArsR family                          | FIG00003845 | idu(3);CBSS-1085.1.peg.1363                                                                                                                                                |
| fig 6666666.28482.peg.242 | Contig_10 | 672    | 19     | - | Transcriptional regulator, TetR family                          | FIG00554417 | ff                                                                                                                                                                         |
| fig 6666666.28482.peg.243 | Contig_10 | 788    | 1153   | + | Possible membrane protein                                       | FIG01121868 | ff                                                                                                                                                                         |

|                           |           |      |      |   |                                                                           |             |                                                                                                                                                                                                                                                                                                                                                   |
|---------------------------|-----------|------|------|---|---------------------------------------------------------------------------|-------------|---------------------------------------------------------------------------------------------------------------------------------------------------------------------------------------------------------------------------------------------------------------------------------------------------------------------------------------------------|
| fig 6666666.28482.peg.244 | Contig_10 | 1188 | 1658 | + | Cell division protein DivIC (FtsB), stabilizes FtsL against RasP cleavage | FIG00485194 | idu(10);Possible_new_toxin-antitoxin_system_including_DivIC<br>idu(10);Bacterial_Cell_Division<br>idu(10);Cell_division-ribosomal_stress_proteins_cluster<br>idu(10);Bacterial_Cytoskeleton<br>idu(10);Stationary_phase_repair_cluster                                                                                                            |
| fig 6666666.28482.peg.245 | Contig_10 | 2436 | 1669 | - | Enoyl-CoA hydratase (EC 4.2.1.17)                                         | FIG00033206 | idu(51);n-Phenylalkanoic_acid_degradation<br>idu(51);Polyhydroxybutyrate_metabolism<br>idu(51);Isoleucine_degradation<br>idu(51);Fatty_acid_metabolism_cluster<br>idu(51);Lysine_fermentation<br>idu(51);Butanol_Biosynthesis<br>idu(51);Acetyl-CoA_fermentation_to_Butyrate<br>idu(51);Valine_degradation<br>idu(51);Butyrate_metabolism_cluster |
| fig 6666666.28482.peg.246 | Contig_10 | 3155 | 2433 | - | Phenylacetic acid degradation operon negative regulatory protein PaaX     | FIG00020123 | ff                                                                                                                                                                                                                                                                                                                                                |
| fig 6666666.28482.peg.247 | Contig_10 | 4097 | 3159 | - | Enoyl-CoA hydratase                                                       | FIG01356316 | ff                                                                                                                                                                                                                                                                                                                                                |
| fig 6666666.28482.peg.248 | Contig_10 | 5769 | 4159 | - | Acyl-CoA dehydrogenase (EC 1.3.99.3)                                      | FIG00002266 | ff                                                                                                                                                                                                                                                                                                                                                |
| fig 6666666.28482.peg.249 | Contig_10 | 6640 | 5834 | - | Lipoprotein LpqP                                                          | FIG01387107 | ff                                                                                                                                                                                                                                                                                                                                                |

|                           |           |       |       |   |                                                                                  |             |                                                                                                        |
|---------------------------|-----------|-------|-------|---|----------------------------------------------------------------------------------|-------------|--------------------------------------------------------------------------------------------------------|
| fig 6666666.28482.peg.250 | Contig_10 | 7437  | 6682  | - | Endonuclease IV (EC 3.1.21.2)                                                    | FIG00000899 | isu;DNA_repair,_bacterial                                                                              |
| fig 6666666.28482.peg.251 | Contig_10 | 11520 | 7573  | - | DNA-directed RNA polymerase beta' subunit (EC 2.7.7.6)                           | FIG00000242 | isu;Mycobacterium_virulence_operon_involved_in_DNA_transcription<br>isu;RNA_polymerase_bacterial       |
| fig 6666666.28482.peg.252 | Contig_10 | 14867 | 11577 | - | DNA-directed RNA polymerase beta subunit (EC 2.7.7.6)                            | FIG00000156 | icw(1);Mycobacterium_virulence_operon_involved_in_DNA_transcription<br>icw(1);RNA_polymerase_bacterial |
| fig 6666666.28482.peg.253 | Contig_10 | 16504 | 15491 | - | Methionine ABC transporter ATP-binding protein                                   | FIG00006151 | ff                                                                                                     |
| fig 6666666.28482.peg.254 | Contig_10 | 18146 | 16665 | - | "Lignostilbene-alpha,beta-dioxygenase and related enzymes"                       | FIG01324754 | ff                                                                                                     |
| fig 6666666.28482.peg.255 | Contig_10 | 18218 | 18901 | + | Transcriptional regulator, TetR family                                           | FIG00554417 | ff                                                                                                     |
| fig 6666666.28482.peg.256 | Contig_10 | 19347 | 18952 | - | LSU ribosomal protein L7/L12 (P1/P2)                                             | FIG00000141 | icw(1);Ribosome_LSU_bacterial<br>isu;LSU_ribosomal_proteins_cluster                                    |
| fig 6666666.28482.peg.257 | Contig_10 | 20013 | 19390 | - | LSU ribosomal protein L10p (P0)                                                  | FIG00000159 | isu;Ribosome_LSU_bacterial<br>icw(1);LSU_ribosomal_proteins_cluster                                    |
| fig 6666666.28482.peg.258 | Contig_10 | 21169 | 20255 | - | Sugar kinase                                                                     | FIG01338213 | ff                                                                                                     |
| fig 6666666.28482.peg.259 | Contig_10 | 21771 | 21169 | - | POSSIBLE MALONYL COA-ACYL CARRIER PROTEIN TRANSACYLASE FABD2 (MCT) (EC 2.3.1.39) | FIG00820219 | ff                                                                                                     |

|                           |           |       |       |   |                                                             |             |                                                                        |
|---------------------------|-----------|-------|-------|---|-------------------------------------------------------------|-------------|------------------------------------------------------------------------|
| fig 6666666.28482.peg.260 | Contig_10 | 25946 | 21783 | - | Alpha-mannosidase (EC 3.2.1.24)                             | FIG00009194 | isu;Mannose_Metabolism                                                 |
| fig 6666666.28482.peg.261 | Contig_10 | 26005 | 26595 | + | FIG00823430: hypothetical protein                           | FIG00823427 | ff                                                                     |
| fig 6666666.28482.peg.262 | Contig_10 | 26571 | 27572 | + | carboxyl esterase                                           | FIG01381021 | ff                                                                     |
| fig 6666666.28482.peg.263 | Contig_10 | 27625 | 28971 | + | Ubiquinone biosynthesis monooxygenase UbiB                  | FIG00000320 | idu(1);Ubiquinone_Biosynthesis                                         |
| fig 6666666.28482.peg.264 | Contig_10 | 28981 | 29886 | + | carboxyl esterase                                           | FIG01381021 | ff                                                                     |
| fig 6666666.28482.peg.265 | Contig_10 | 29979 | 30839 | + | Methoxy mycolic acid synthase 1 MmaA1 (EC 2.1.1.-)          | FIG01353571 | ff                                                                     |
| fig 6666666.28482.peg.266 | Contig_10 | 30876 | 31739 | + | Cyclopropane-fatty-acyl-phospholipid synthase (EC 2.1.1.79) | FIG00001555 | ff                                                                     |
| fig 6666666.28482.peg.267 | Contig_10 | 31857 | 32738 | + | Cyclopropane-fatty-acyl-phospholipid synthase (EC 2.1.1.79) | FIG00001555 | ff                                                                     |
| fig 6666666.28482.peg.268 | Contig_10 | 32826 | 33725 | + | Cyclopropane-fatty-acyl-phospholipid synthase (EC 2.1.1.79) | FIG00001555 | ff                                                                     |
| fig 6666666.28482.peg.269 | Contig_10 | 33822 | 34520 | + | FIG00822465: hypothetical protein                           | FIG00822464 | ff                                                                     |
| fig 6666666.28482.peg.270 | Contig_10 | 34529 | 35746 | + | RNA polymerase sigma-70 factor, ECF subfamily               | FIG00952839 | ff                                                                     |
| fig 6666666.28482.peg.271 | Contig_10 | 36523 | 35816 | - | LSU ribosomal protein L1p (L10Ae)                           | FIG00000264 | icw(1);Ribosome_LSU_bacterial<br>icw(3);LSU_ribosomal_proteins_cluster |
| fig 6666666.28482.peg.272 | Contig_10 | 37074 | 36646 | - | LSU ribosomal protein L11p (L12e)                           | FIG00000182 | isu;Ribosome_LSU_bacterial<br>icw(1);LSU_ribosomal_proteins_cluster    |

|                           |           |       |       |   |                                                                         |             |                                                                           |
|---------------------------|-----------|-------|-------|---|-------------------------------------------------------------------------|-------------|---------------------------------------------------------------------------|
| fig 6666666.28482.peg.273 | Contig_10 | 37905 | 37120 | - | Transcription antitermination protein NusG                              | FIG00000269 | icw(2);LSU_ribosomal_proteins_cluster isu;Transcription_factors_bacterial |
| fig 6666666.28482.peg.274 | Contig_10 | 38398 | 37934 | - | Preprotein translocase subunit SecE (TC 3.A.5.1.1)                      | FIG00001219 | isu;LSU_ribosomal_proteins_cluster                                        |
| fig 6666666.28482.rna.2   | Contig_10 | 38569 | 38497 | - | tRNA-Trp-CCA                                                            |             | isu;tRNAs                                                                 |
| fig 6666666.28482.peg.275 | Contig_10 | 39214 | 38714 | - | FIG00820537: hypothetical protein                                       | FIG00820536 | ff                                                                        |
| fig 6666666.28482.peg.276 | Contig_10 | 39646 | 39218 | - | (3R)-hydroxyacyl-ACP dehydratase subunit HadB                           |             |                                                                           |
| fig 6666666.28482.peg.277 | Contig_10 | 40112 | 39633 | - | FIG00995223: hypothetical protein                                       | FIG00821179 | ff                                                                        |
| fig 6666666.28482.peg.278 | Contig_10 | 40305 | 40156 | - | LSU ribosomal protein L33p @ LSU ribosomal protein L33p, zinc-dependent |             | icw(2);Ribosome_LSU_bacterial<br>icw(2);Ribosome_LSU_bacterial            |
| fig 6666666.28482.rna.3   | Contig_10 | 40447 | 40374 | - | tRNA-Met-CAT                                                            |             |                                                                           |
| fig 6666666.28482.rna.4   | Contig_10 | 40573 | 40501 | - | tRNA-Thr-GGT                                                            |             |                                                                           |
| fig 6666666.28482.peg.279 | Contig_10 | 40904 | 40701 | - | FIG00822280: hypothetical protein                                       | FIG00822279 | ff                                                                        |
| fig 6666666.28482.peg.280 | Contig_10 | 40991 | 41689 | + | FIG00822416: hypothetical protein                                       | FIG00822414 | ff                                                                        |
| fig 6666666.28482.peg.281 | Contig_10 | 41785 | 42618 | + | Possible membrane protein                                               | FIG01121868 | ff                                                                        |
| fig 6666666.28482.peg.282 | Contig_10 | 42642 | 43337 | + | Enoyl-CoA hydratase                                                     | FIG01422808 | ff                                                                        |
| fig 6666666.28482.peg.283 | Contig_10 | 43955 | 43464 | - | Cyanate hydratase (EC 4.2.1.104)                                        | FIG00095254 | isu;Cyanate_hydrolysis                                                    |
| fig 6666666.28482.peg.284 | Contig_10 | 44796 | 44041 | - | FIG00833504: hypothetical protein                                       | FIG00833502 | ff                                                                        |

|                           |           |       |       |   |                                                                  |             |                                                                                                         |
|---------------------------|-----------|-------|-------|---|------------------------------------------------------------------|-------------|---------------------------------------------------------------------------------------------------------|
| fig 6666666.28482.peg.285 | Contig_10 | 45351 | 44818 | - | FIG00830631:<br>hypothetical protein                             | FIG00830630 | ff                                                                                                      |
| fig 6666666.28482.peg.286 | Contig_10 | 45406 | 48693 | + | Exodeoxyribonuclease V<br>gamma chain (EC<br>3.1.11.5)           | FIG00493440 | isu;DNA-replication<br>icw(1);DNA_repair,_bacterial_RecBC<br>D_pathway                                  |
| fig 6666666.28482.peg.287 | Contig_10 | 48694 | 52005 | + | Exodeoxyribonuclease V<br>beta chain (EC 3.1.11.5)               | FIG00043030 | icw(1);DNA-replication<br>isu;DNA_repair,_bacterial_RecBCD_p<br>athway                                  |
| fig 6666666.28482.peg.288 | Contig_10 | 52002 | 53723 | + | Exodeoxyribonuclease V<br>alpha chain (EC 3.1.11.5)              | FIG00047674 | isu;CBSS-269801.1.peg.2186<br>icw(1);DNA-replication<br>icw(1);DNA_repair,_bacterial_RecBC<br>D_pathway |
| fig 6666666.28482.peg.289 | Contig_10 | 53839 | 54546 | + | Possible membrane<br>protein                                     | FIG00825285 | ff                                                                                                      |
| fig 6666666.28482.peg.290 | Contig_10 | 56102 | 54552 | - | MCE-family protein<br>Mce1F                                      | FIG00821171 | idu(7);Mycobacterium_virulence_ope<br>ron_MCE_involved_in_cell_invasion                                 |
| fig 6666666.28482.peg.291 | Contig_10 | 57248 | 56106 | - | MCE-family lipoprotein<br>LprK (MCE-family<br>lipoprotein Mce1e) | FIG00819998 | icw(2);Mycobacterium_virulence_op<br>eron_MCE_involved_in_cell_invasion                                 |
| fig 6666666.28482.peg.292 | Contig_10 | 58768 | 57311 | - | MCE-family protein<br>Mce1D                                      | FIG00820669 | icw(1);Mycobacterium_virulence_op<br>eron_MCE_involved_in_cell_invasion                                 |
| fig 6666666.28482.peg.293 | Contig_10 | 60189 | 58765 | - | MCE-family protein<br>Mce1C                                      | FIG00821293 | icw(7);Mycobacterium_virulence_op<br>eron_MCE_involved_in_cell_invasion                                 |
| fig 6666666.28482.peg.294 | Contig_10 | 61217 | 60186 | - | MCE-family protein<br>Mce1B                                      | FIG00763551 | icw(5);Mycobacterium_virulence_op<br>eron_MCE_involved_in_cell_invasion                                 |
| fig 6666666.28482.peg.295 | Contig_10 | 62389 | 61214 | - | MCE-family protein<br>Mce1A                                      | FIG00820494 | icw(2);Mycobacterium_virulence_op<br>eron_MCE_involved_in_cell_invasion                                 |

|                           |           |       |       |   |                                                               |             |                                                                         |
|---------------------------|-----------|-------|-------|---|---------------------------------------------------------------|-------------|-------------------------------------------------------------------------|
| fig 6666666.28482.peg.296 | Contig_10 | 63297 | 62443 | - | Conserved hypothetical<br>integral membrane<br>protein YrbE1B | FIG00691621 | icw(3);Mycobacterium_virulence_op<br>eron_MCE_involved_in_cell_invasion |
| fig 6666666.28482.peg.297 | Contig_10 | 64111 | 63314 | - | Conserved hypothetical<br>integral membrane<br>protein YrbE1A | FIG00690583 | idu(7);Mycobacterium_virulence_ope<br>ron_MCE_involved_in_cell_invasion |
| fig 6666666.28482.peg.298 | Contig_10 | 64830 | 64108 | - | Transcriptional regulator,<br>GntR family                     | FIG00621925 | ff                                                                      |
| fig 6666666.28482.peg.299 | Contig_10 | 65863 | 64922 | - | FIG00829409:<br>hypothetical protein                          | FIG00829406 | ff                                                                      |
| fig 6666666.28482.peg.300 | Contig_10 | 66816 | 65866 | - | FIG00820461:<br>hypothetical protein                          | FIG00820460 | ff                                                                      |
| fig 6666666.28482.peg.301 | Contig_10 | 66947 | 69334 | + | Possible membrane<br>protein                                  | FIG01121868 | ff                                                                      |
| fig 6666666.28482.peg.302 | Contig_10 | 71971 | 69341 | - | Alpha-1,2-mannosidase                                         | FIG00004078 | isu;Mannose_Metabolism                                                  |
| fig 6666666.28482.peg.303 | Contig_10 | 72127 | 72801 | + | Lipoprotein LpqN                                              | FIG01321357 | ff                                                                      |
| fig 6666666.28482.peg.304 | Contig_10 | 73052 | 73363 | + | FIG030357: hypothetical<br>protein                            | FIG01326564 | ff                                                                      |
| fig 6666666.28482.peg.305 | Contig_10 | 74027 | 73347 | - | FIG00827459:<br>hypothetical protein                          | FIG00827456 | ff                                                                      |

|                           |           |       |       |   |                                                         |             |                                                                                                                                                                                                                                                                                                                           |
|---------------------------|-----------|-------|-------|---|---------------------------------------------------------|-------------|---------------------------------------------------------------------------------------------------------------------------------------------------------------------------------------------------------------------------------------------------------------------------------------------------------------------------|
| fig 6666666.28482.peg.306 | Contig_10 | 75140 | 74379 | - | Enoyl-CoA hydratase (EC 4.2.1.17)                       | FIG00033206 | idu(51);n-Phenylalkanoic_acid_degradation idu(51);Polyhydroxybutyrate_metabolism idu(51);Isoleucine_degradation idu(51);Fatty_acid_metabolism_cluster idu(51);Lysine_fermentation idu(51);Butanol_Biosynthesis idu(51);Acetyl-CoA_fermentation_to_Butyrate idu(51);Valine_degradation idu(51);Butyrate_metabolism_cluster |
| fig 6666666.28482.peg.307 | Contig_10 | 76234 | 75137 | - | Galactokinase (EC 2.7.1.6)                              | FIG00024073 | icw(1);Lactose_and_Galactose_Uptake_and_Utilization                                                                                                                                                                                                                                                                       |
| fig 6666666.28482.peg.308 | Contig_10 | 77325 | 76231 | - | Galactose-1-phosphate uridylyltransferase (EC 2.7.7.10) | FIG00623809 | isu;Lactose_and_Galactose_Uptake_and_Utilization                                                                                                                                                                                                                                                                          |
| fig 6666666.28482.peg.309 | Contig_10 | 77461 | 79602 | + | FIG00825533: hypothetical protein                       | FIG00825532 | ff                                                                                                                                                                                                                                                                                                                        |
| fig 6666666.28482.peg.310 | Contig_10 | 79626 | 79964 | + | hypothetical protein                                    |             |                                                                                                                                                                                                                                                                                                                           |
| fig 6666666.28482.peg.311 | Contig_10 | 80215 | 79994 | - | hypothetical protein                                    |             |                                                                                                                                                                                                                                                                                                                           |
| fig 6666666.28482.peg.312 | Contig_10 | 80371 | 81351 | + | FIG00821847: hypothetical protein                       | FIG00821846 | ff                                                                                                                                                                                                                                                                                                                        |
| fig 6666666.28482.peg.313 | Contig_10 | 81375 | 82577 | + | Multidrug resistance protein                            | FIG01352351 | ff                                                                                                                                                                                                                                                                                                                        |
| fig 6666666.28482.peg.314 | Contig_10 | 82711 | 83940 | + | putative cytochrome P450 hydroxylase                    | FIG00032437 | idu(49);Nitric_oxide_synthase                                                                                                                                                                                                                                                                                             |

|                           |           |        |       |   |                                                                  |             |                                                                                                                                               |
|---------------------------|-----------|--------|-------|---|------------------------------------------------------------------|-------------|-----------------------------------------------------------------------------------------------------------------------------------------------|
| fig 6666666.28482.peg.315 | Contig_10 | 85458  | 84016 | - | 6-aminohexanoate-cyclic-<br>dimer hydrolase (EC<br>3.5.2.12)     | FIG00627545 | ff                                                                                                                                            |
| fig 6666666.28482.peg.316 | Contig_10 | 85707  | 85537 | - | hypothetical protein                                             |             |                                                                                                                                               |
| fig 6666666.28482.peg.317 | Contig_10 | 85736  | 86911 | + | FIG00823762:<br>hypothetical protein                             | FIG00823758 | ff                                                                                                                                            |
| fig 6666666.28482.peg.318 | Contig_10 | 87944  | 86913 | - | MaoC domain protein<br>dehydratase                               |             | isu;CBSS-216591.1.peg.168                                                                                                                     |
| fig 6666666.28482.peg.319 | Contig_10 | 88123  | 89046 | + | Cobalt-zinc-cadmium<br>resistance protein CzcD                   | FIG00000503 | idu(1);CBSS-36873.1.peg.4752<br>idu(1);Cobalt-zinc-<br>cadmium_resistance                                                                     |
| fig 6666666.28482.peg.320 | Contig_10 | 90335  | 89043 | - | Manganese transport<br>protein MntH                              | FIG00554286 | ff                                                                                                                                            |
| fig 6666666.28482.peg.321 | Contig_10 | 90441  | 91244 | + | carveol-like<br>dehydrogenase                                    |             |                                                                                                                                               |
| fig 6666666.28482.rna.5   | Contig_10 | 91513  | 91431 | - | tRNA-Tyr-GTA                                                     |             |                                                                                                                                               |
| fig 6666666.28482.peg.322 | Contig_10 | 91582  | 92073 | + | hypothetical protein                                             |             |                                                                                                                                               |
| fig 6666666.28482.peg.323 | Contig_10 | 92156  | 93667 | + | monooxygenase, flavin-<br>binding family                         | FIG01386881 | ff                                                                                                                                            |
| fig 6666666.28482.peg.324 | Contig_10 | 95184  | 96212 | + | Glycerol-3-phosphate<br>dehydrogenase<br>[NAD(P)+] (EC 1.1.1.94) | FIG00000309 | idu(1);Glycerol_and_Glycerol-3-<br>phosphate_Uptake_and_Utilization<br>idu(1);Glycerolipid_and_Glycerophos<br>pholipid_Metabolism_in_Bacteria |
| fig 6666666.28482.peg.325 | Contig_10 | 96445  | 97944 | + | putative transmembrane<br>transport protein                      | FIG01126523 | ff                                                                                                                                            |
| fig 6666666.28482.peg.326 | Contig_10 | 99373  | 97949 | - | PE-PGRS FAMILY<br>PROTEIN                                        |             |                                                                                                                                               |
| fig 6666666.28482.peg.327 | Contig_10 | 100337 | 99483 | - | Probable protease htpX<br>homolog (EC 3.4.24.-)                  | FIG01385468 | ff                                                                                                                                            |

|                           |           |        |        |   |                                                                                                                                                                                                                     |             |                                                                                                                                       |
|---------------------------|-----------|--------|--------|---|---------------------------------------------------------------------------------------------------------------------------------------------------------------------------------------------------------------------|-------------|---------------------------------------------------------------------------------------------------------------------------------------|
| fig 6666666.28482.peg.328 | Contig_10 | 101398 | 100409 | - | Octaprenyl-diphosphate synthase (EC 2.5.1.-) / Dimethylallyltransferase (EC 2.5.1.1) / Geranyltranstransferase (farnesyldiphosphate synthase) (EC 2.5.1.10) / Geranylgeranyl pyrophosphate synthetase (EC 2.5.1.29) | FIG00000019 | isu;Isoprenoid_Biosynthesis                                                                                                           |
| fig 6666666.28482.peg.329 | Contig_10 | 101438 | 102658 | + | Possible oxidoreductase (EC 1.-.-.)                                                                                                                                                                                 | FIG00832005 | ff                                                                                                                                    |
| fig 6666666.28482.peg.330 | Contig_10 | 102800 | 103477 | + | Possible benzoquinone methyltransferase                                                                                                                                                                             | FIG01318683 | ff                                                                                                                                    |
| fig 6666666.28482.peg.331 | Contig_10 | 103537 | 103839 | + | POSSIBLE CONSERVED SECRETED PROTEIN                                                                                                                                                                                 | FIG00996000 | ff                                                                                                                                    |
| fig 6666666.28482.peg.332 | Contig_10 | 104531 | 103836 | - | Ubiquinone/menaquinone biosynthesis methyltransferase UbiE (EC 2.1.1.-)                                                                                                                                             | FIG01303154 | idu(2);Menaquinone_and_Phylloquinone_Biosynthesis<br>idu(2);Menaquinone_Biosynthesis_via_Futalosine<br>idu(2);Ubiquinone_Biosynthesis |
| fig 6666666.28482.peg.333 | Contig_10 | 105866 | 104550 | - | FIG00825991: hypothetical protein                                                                                                                                                                                   | FIG00825990 | ff                                                                                                                                    |
| fig 6666666.28482.peg.334 | Contig_10 | 107007 | 105856 | - | FIG00821700: hypothetical protein                                                                                                                                                                                   | FIG00821699 | ff                                                                                                                                    |
| fig 6666666.28482.peg.335 | Contig_10 | 107094 | 107561 | + | transcriptional regulator                                                                                                                                                                                           | FIG00629921 | ff                                                                                                                                    |

|                           |           |        |        |   |                                                                                          |             |                                                                                                                                                        |
|---------------------------|-----------|--------|--------|---|------------------------------------------------------------------------------------------|-------------|--------------------------------------------------------------------------------------------------------------------------------------------------------|
| fig 6666666.28482.peg.336 | Contig_10 | 107607 | 108431 | + | oxidoreductase, short-chain dehydrogenase-reductase family                               | FIG01625937 | ff                                                                                                                                                     |
| fig 6666666.28482.peg.337 | Contig_10 | 109587 | 108433 | - | Glycosyltransferase                                                                      | FIG00007960 | ff                                                                                                                                                     |
| fig 6666666.28482.peg.338 | Contig_10 | 110159 | 109617 | - | Possible membrane protein                                                                | FIG01121868 | ff                                                                                                                                                     |
| fig 6666666.28482.peg.339 | Contig_10 | 111790 | 110156 | - | 2-succinyl-5-enolpyruvyl-6-hydroxy-3-cyclohexene-1-carboxylic-acid synthase (EC 2.2.1.9) | FIG00000866 | icw(1);Menaquinone_and_Phylloquinone_Biosynthesis--_gjo<br>icw(1);Menaquinone_and_Phylloquinone_Biosynthesis                                           |
| fig 6666666.28482.peg.340 | Contig_10 | 112626 | 111838 | - | 2-succinyl-6-hydroxy-2,4-cyclohexadiene-1-carboxylate synthase (EC 4.2.99.20)            | FIG00016466 | isu;Menaquinone_and_Phylloquinone_Biosynthesis--_gjo<br>isu;Menaquinone_and_Phylloquinone_Biosynthesis                                                 |
| fig 6666666.28482.peg.341 | Contig_10 | 113594 | 112623 | - | O-succinylbenzoate synthase (EC 4.2.1.113)                                               | FIG01306622 | isu;Muconate_lactonizing_enzyme_family<br>icw(3);Menaquinone_and_Phylloquinone_Biosynthesis--_gjo<br>icw(3);Menaquinone_and_Phylloquinone_Biosynthesis |
| fig 6666666.28482.peg.342 | Contig_10 | 115195 | 113591 | - | Amidohydrolase family protein                                                            | FIG01334632 | ff                                                                                                                                                     |
| fig 6666666.28482.peg.343 | Contig_10 | 115263 | 116867 | + | O-succinylbenzoic acid--CoA ligase (EC 6.2.1.26)                                         | FIG00000860 | icw(2);Menaquinone_and_Phylloquinone_Biosynthesis--_gjo<br>icw(2);Menaquinone_and_Phylloquinone_Biosynthesis                                           |
| fig 6666666.28482.peg.344 | Contig_10 | 117485 | 116937 | - | Transcriptional regulator, TetR family                                                   | FIG00554417 | ff                                                                                                                                                     |
| fig 6666666.28482.peg.345 | Contig_10 | 117568 | 118455 | + | FIG00823672: hypothetical protein                                                        | FIG00823670 | ff                                                                                                                                                     |

|                           |           |        |        |   |                                                              |             |                                                                                                               |
|---------------------------|-----------|--------|--------|---|--------------------------------------------------------------|-------------|---------------------------------------------------------------------------------------------------------------|
| fig 6666666.28482.peg.346 | Contig_10 | 118466 | 118921 | + | FIG00819980:<br>hypothetical protein                         | FIG00819977 | ff                                                                                                            |
| fig 6666666.28482.peg.347 | Contig_10 | 118927 | 119619 | + | hypothetical protein                                         |             |                                                                                                               |
| fig 6666666.28482.peg.348 | Contig_10 | 119616 | 120518 | + | Naphthoate synthase (EC 4.1.3.36)                            | FIG00071623 | idu(2);Menaquinone_and_Phylloquinone_Biosynthesis_--_gjo<br>idu(2);Menaquinone_and_Phylloquinone_Biosynthesis |
| fig 6666666.28482.peg.349 | Contig_10 | 120601 | 121440 | + | "Oxidoreductase, short-chain dehydrogenase/reductase family" | FIG01320732 | ff                                                                                                            |
| fig 6666666.28482.peg.350 | Contig_10 | 121430 | 122056 | + | FIG00832411:<br>hypothetical protein                         | FIG00832410 | ff                                                                                                            |
| fig 6666666.28482.peg.351 | Contig_10 | 122070 | 122459 | + | FIG020377: hypothetical protein                              | FIG01001139 | ff                                                                                                            |
| fig 6666666.28482.peg.352 | Contig_10 | 122575 | 123792 | + | Probable low-affinity inorganic phosphate transporter        | FIG00009601 | isu;Phosphate_metabolism                                                                                      |
| fig 6666666.28482.peg.353 | Contig_10 | 123789 | 124088 | + | hypothetical protein                                         |             |                                                                                                               |
| fig 6666666.28482.peg.354 | Contig_10 | 124136 | 124441 | + | FIG00995255:<br>hypothetical protein                         | FIG00820338 | ff                                                                                                            |
| fig 6666666.28482.peg.355 | Contig_10 | 124486 | 125595 | + | O-succinylbenzoic acid--CoA ligase (EC 6.2.1.26)             | FIG00000860 | icw(1);Menaquinone_and_Phylloquinone_Biosynthesis_--_gjo<br>icw(1);Menaquinone_and_Phylloquinone_Biosynthesis |
| fig 6666666.28482.peg.356 | Contig_10 | 125610 | 126962 | + | Putative ESX-1 secretion system component Rv3877             | FIG00092051 | ff                                                                                                            |
| fig 6666666.28482.peg.357 | Contig_10 | 126974 | 127159 | + | hypothetical protein                                         |             |                                                                                                               |
| fig 6666666.28482.peg.358 | Contig_10 | 127904 | 127242 | - | FIG00821404:<br>hypothetical protein                         | FIG00821403 | ff                                                                                                            |
| fig 6666666.28482.peg.359 | Contig_10 | 128557 | 127901 | - | Glycosyltransferase (EC 2.4.1.-)                             | FIG01193496 | ff                                                                                                            |

|                           |            |        |        |   |                                                           |             |                                                                                                                                                     |
|---------------------------|------------|--------|--------|---|-----------------------------------------------------------|-------------|-----------------------------------------------------------------------------------------------------------------------------------------------------|
| fig 6666666.28482.peg.360 | Contig_10  | 130956 | 128572 | - | interspersed repeat antigen, putative                     |             |                                                                                                                                                     |
| fig 6666666.28482.peg.361 | Contig_100 | 199    | 1362   | + | FIG00830647: hypothetical monooxygenase                   | FIG00830644 | ff                                                                                                                                                  |
| fig 6666666.28482.peg.362 | Contig_100 | 1943   | 2095   | + | hypothetical protein                                      |             |                                                                                                                                                     |
| fig 6666666.28482.peg.363 | Contig_100 | 2598   | 2092   | - | hypothetical protein                                      |             |                                                                                                                                                     |
| fig 6666666.28482.peg.364 | Contig_100 | 2833   | 3162   | + | hypothetical protein                                      |             |                                                                                                                                                     |
| fig 6666666.28482.peg.365 | Contig_100 | 3678   | 3211   | - | FIG00823285: hypothetical protein                         | FIG00823280 | ff                                                                                                                                                  |
| fig 6666666.28482.peg.366 | Contig_100 | 3807   | 4889   | + | D-alanyl-D-alanine carboxypeptidase (EC 3.4.16.4)         | FIG00561498 | idu(3);Murein_Hydrolases<br>idu(3);CBSS-84588.1.peg.1247<br>idu(3);Metallocoarboxypeptidases_(EC<br>_3.4.17.-)<br>idu(3);Peptidoglycan_Biosynthesis |
| fig 6666666.28482.peg.367 | Contig_100 | 6453   | 4897   | - | Allophanate hydrolase (EC 3.5.1.54)                       | FIG00229246 | isu;Urea_carboxylase_and_Allophanate_hydrolase_cluster                                                                                              |
| fig 6666666.28482.peg.368 | Contig_100 | 7873   | 6467   | - | Short chain fatty acids transporter                       | FIG00013994 | isu;Polyhydroxybutyrate_metabolism                                                                                                                  |
| fig 6666666.28482.peg.369 | Contig_100 | 8140   | 8877   | + | 3-oxoacyl-[acyl-carrier protein] reductase (EC 1.1.1.100) | FIG00621114 | idu(38);CBSS-246196.1.peg.364<br>idu(38);CBSS-164757.7.peg.5020<br>idu(38);Fatty_Acid_Biosynthesis_FASI                                             |
| fig 6666666.28482.peg.370 | Contig_100 | 8899   | 9645   | + | putative short-chain dehydrogenase                        | FIG01059210 | ff                                                                                                                                                  |
| fig 6666666.28482.peg.371 | Contig_100 | 9680   | 10423  | + | hypothetical protein                                      |             |                                                                                                                                                     |
| fig 6666666.28482.peg.372 | Contig_100 | 10437  | 11414  | + | RNA polymerase sigma-70 factor, family protein            |             |                                                                                                                                                     |
| fig 6666666.28482.peg.373 | Contig_101 | 2066   | 840    | - | FIG00823053: hypothetical protein                         | FIG00823051 | ff                                                                                                                                                  |
| fig 6666666.28482.peg.374 | Contig_101 | 2223   | 2086   | - | hypothetical protein                                      |             |                                                                                                                                                     |

|                           |            |       |       |   |                                                                                                     |             |                                                          |
|---------------------------|------------|-------|-------|---|-----------------------------------------------------------------------------------------------------|-------------|----------------------------------------------------------|
| fig 6666666.28482.peg.375 | Contig_101 | 2222  | 2710  | + | Transcriptional regulator, TetR family                                                              | FIG00554417 | ff                                                       |
| fig 6666666.28482.peg.376 | Contig_101 | 2856  | 3332  | + | Bile acid 7-alpha dehydratase BaiE (EC 4.2.1.106)                                                   | FIG00774380 | ff                                                       |
| fig 6666666.28482.peg.377 | Contig_101 | 3975  | 3322  | - | FIG019540: hypothetical protein                                                                     | FIG01325408 | ff                                                       |
| fig 6666666.28482.peg.378 | Contig_101 | 4676  | 4047  | - | hypothetical protein                                                                                | FIG00638284 | ff                                                       |
| fig 6666666.28482.peg.379 | Contig_101 | 4710  | 5192  | + | FIG00820335: hypothetical protein                                                                   | FIG00820334 | ff                                                       |
| fig 6666666.28482.peg.380 | Contig_101 | 5460  | 5176  | - | FIG00826871: hypothetical protein                                                                   | FIG00826870 | ff                                                       |
| fig 6666666.28482.peg.381 | Contig_101 | 5459  | 6157  | + | Cobalamin biosynthesis protein BluB @ 5,6-dimethylbenzimidazole synthase, flavin destructase family | FIG00001607 | isu;Cobalamin_synthesis<br>isu;Coenzyme_B12_biosynthesis |
| fig 6666666.28482.peg.382 | Contig_101 | 6230  | 7594  | + | probable sulfatase atsG                                                                             | FIG01736791 | ff                                                       |
| fig 6666666.28482.peg.383 | Contig_101 | 8383  | 7601  | - | Trans-aconitate 2-methyltransferase (EC 2.1.1.144)                                                  | FIG00626701 | ff                                                       |
| fig 6666666.28482.peg.384 | Contig_101 | 8465  | 9679  | + | FIG00821889: hypothetical protein                                                                   | FIG00821888 | ff                                                       |
| fig 6666666.28482.peg.385 | Contig_101 | 10750 | 9752  | - | ESX-3 secretion system protein EccE3                                                                | FIG01337146 | ff                                                       |
| fig 6666666.28482.peg.386 | Contig_101 | 12150 | 10747 | - | Type VII secretion-associated serine protease mycosin MycP3                                         | FIG01341840 | ff                                                       |
| fig 6666666.28482.peg.387 | Contig_101 | 13556 | 12132 | - | ESX-3 secretion system protein EccD3                                                                | FIG01324346 | ff                                                       |

|                           |            |       |       |   |                                                            |             |                                |
|---------------------------|------------|-------|-------|---|------------------------------------------------------------|-------------|--------------------------------|
| fig 6666666.28482.peg.388 | Contig_101 | 14492 | 13611 | - | RD1 region associated protein Rv3866                       | FIG00029355 | ff                             |
| fig 6666666.28482.peg.389 | Contig_101 | 14803 | 14513 | - | 10 kDa antigen CFP7                                        | FIG01333717 | ff                             |
| fig 6666666.28482.peg.390 | Contig_101 | 15128 | 14835 | - | PE family protein                                          | FIG01311212 | ff                             |
| fig 6666666.28482.peg.391 | Contig_101 | 15374 | 15180 | - | PPE family protein                                         | FIG00013075 | idu(57);CBSS-164757.7.peg.5020 |
| fig 6666666.28482.peg.392 | Contig_102 | 33    | 3659  | + | Metal cation transporting P-type ATPase CtpH               | FIG01340869 | ff                             |
| fig 6666666.28482.peg.393 | Contig_102 | 3721  | 3996  | + | FIG00821936: hypothetical protein                          | FIG00821935 | ff                             |
| fig 6666666.28482.peg.394 | Contig_102 | 7792  | 4001  | - | FIG00829714: hypothetical protein                          | FIG00829710 | ff                             |
| fig 6666666.28482.peg.395 | Contig_102 | 8172  | 7789  | - | anti sigma factor antagonist                               | FIG01125797 | ff                             |
| fig 6666666.28482.peg.396 | Contig_102 | 8933  | 8253  | - | FIG00828626: hypothetical protein                          | FIG00828625 | ff                             |
| fig 6666666.28482.peg.397 | Contig_102 | 9103  | 10734 | + | Hydroxymethylpyrimidine phosphate synthase ThiC            | FIG01958823 | ff                             |
| fig 6666666.28482.peg.398 | Contig_102 | 10731 | 11558 | + | Hydroxymethylpyrimidine phosphate kinase ThiD (EC 2.7.4.7) | FIG01958950 | ff                             |
| fig 6666666.28482.peg.399 | Contig_102 | 11608 | 12231 | + | FIG022825: hypothetical protein                            | FIG00828299 | ff                             |
| fig 6666666.28482.peg.400 | Contig_102 | 12262 | 12465 | + | hypothetical protein                                       |             |                                |
| fig 6666666.28482.peg.401 | Contig_102 | 12521 | 12955 | + | Transcriptional regulator, MarR family                     | FIG00554610 | ff                             |
| fig 6666666.28482.peg.402 | Contig_102 | 12975 | 13844 | + | FIG00828275: hypothetical protein                          | FIG00828264 | ff                             |
| fig 6666666.28482.peg.403 | Contig_102 | 15304 | 13847 | - | Lipoprotein peptidase LpqM                                 | FIG01332312 | ff                             |
| fig 6666666.28482.peg.404 | Contig_102 | 15536 | 15652 | + | hypothetical protein                                       |             |                                |

|                           |            |       |       |   |                                                                        |             |                                                                                                                                              |
|---------------------------|------------|-------|-------|---|------------------------------------------------------------------------|-------------|----------------------------------------------------------------------------------------------------------------------------------------------|
| fig 6666666.28482.peg.405 | Contig_103 | 716   | 393   | - | Preprotein translocase subunit YajC (TC 3.A.5.1.1)                     | FIG00051656 | ff                                                                                                                                           |
| fig 6666666.28482.peg.406 | Contig_103 | 893   | 2242  | + | Gamma-aminobutyrate:alpha-ketoglutarate aminotransferase (EC 2.6.1.19) | FIG00006767 | isu;Putrescine_utilization_pathways                                                                                                          |
| fig 6666666.28482.peg.407 | Contig_103 | 2375  | 5851  | + | Long-chain-fatty-acid--CoA ligase (EC 6.2.1.3)                         | FIG00018699 | idu(72);n-Phenylalkanoic_acid_degradation idu(72);Fatty_acid_metabolism_cluster idu(72);Biotin_synthesis_cluster idu(72);Biotin_biosynthesis |
| fig 6666666.28482.peg.408 | Contig_103 | 6554  | 5916  | - | FIG00825396: hypothetical protein                                      | FIG00825394 | ff                                                                                                                                           |
| fig 6666666.28482.peg.409 | Contig_103 | 7105  | 6719  | - | FIG00822359: hypothetical protein                                      | FIG00822353 | ff                                                                                                                                           |
| fig 6666666.28482.peg.410 | Contig_103 | 7865  | 7215  | - | FIG00825396: hypothetical protein                                      | FIG00825394 | ff                                                                                                                                           |
| fig 6666666.28482.peg.411 | Contig_103 | 9006  | 7957  | - | Holliday junction DNA helicase RuvB                                    | FIG00000352 | icw(2);DNA-replication icw(2);RuvABC_plus_a_hypothetical                                                                                     |
| fig 6666666.28482.peg.412 | Contig_103 | 9596  | 9003  | - | Holliday junction DNA helicase RuvA                                    | FIG00000314 | isu;DNA-replication icw(1);RuvABC_plus_a_hypothetical                                                                                        |
| fig 6666666.28482.peg.413 | Contig_103 | 10162 | 9593  | - | Crossover junction endodeoxyribonuclease RuvC (EC 3.1.22.4)            | FIG00095112 | icw(1);DNA-replication isu;RuvABC_plus_a_hypothetical                                                                                        |
| fig 6666666.28482.peg.414 | Contig_103 | 10305 | 10916 | + | Possible membrane protein                                              | FIG01121868 | ff                                                                                                                                           |

|                           |            |       |       |   |                                                                                                  |             |                                                 |
|---------------------------|------------|-------|-------|---|--------------------------------------------------------------------------------------------------|-------------|-------------------------------------------------|
| fig 6666666.28482.peg.415 | Contig_103 | 10963 | 11430 | + | FIG00993990:<br>hypothetical protein                                                             | FIG00820419 | ff                                              |
| fig 6666666.28482.peg.416 | Contig_103 | 11427 | 11858 | + | Possible membrane<br>protein                                                                     | FIG01121868 | ff                                              |
| fig 6666666.28482.peg.417 | Contig_103 | 11898 | 12353 | + | hypothetical protein                                                                             |             |                                                 |
| fig 6666666.28482.peg.418 | Contig_103 | 12350 | 13885 | + | Spermidine synthase (EC<br>2.5.1.16)                                                             | FIG00000642 | isu;Polyamine_Metabolism                        |
| fig 6666666.28482.peg.419 | Contig_103 | 14496 | 13882 | - | SAM-dependent<br>methyltransferase (EC<br>2.1.1.-)                                               | FIG00509796 | ff                                              |
| fig 6666666.28482.peg.420 | Contig_103 | 15265 | 14510 | - | FIG000859: hypothetical<br>protein                                                               | FIG00000859 | ff                                              |
| fig 6666666.28482.peg.421 | Contig_103 | 16093 | 15497 | - | Pyridoxine biosynthesis<br>glutamine<br>amidotransferase,<br>glutaminase subunit (EC<br>2.4.2.-) | FIG00001203 | icw(1);Pyridoxin_(Vitamin_B6)_Biosynthesis      |
| fig 6666666.28482.peg.422 | Contig_103 | 16946 | 16101 | - | Acyl-CoA thioesterase II<br>(EC 3.1.2.-)                                                         | FIG00002217 | idu(3);Acyl-CoA_thioesterase_II                 |
| fig 6666666.28482.peg.423 | Contig_103 | 17870 | 16956 | - | Pyridoxine biosynthesis<br>glutamine<br>amidotransferase,<br>synthase subunit (EC<br>2.4.2.-)    | FIG00021445 | isu;Pyridoxin_(Vitamin_B6)_Biosynthesis         |
| fig 6666666.28482.peg.424 | Contig_104 | 61    | 540   | + | hypothetical protein                                                                             | FIG00638284 | ff                                              |
| fig 6666666.28482.peg.425 | Contig_104 | 1132  | 590   | - | FIG00820972:<br>hypothetical protein                                                             | FIG00820970 | ff                                              |
| fig 6666666.28482.peg.426 | Contig_104 | 1678  | 1145  | - | hypothetical protein                                                                             |             |                                                 |
| fig 6666666.28482.peg.427 | Contig_104 | 2573  | 1692  | - | Catechol 1,2-dioxygenase<br>1 (EC 1.13.11.1)                                                     | FIG00007171 | isu;Catechol_branch_of_beta-ketoadipate_pathway |

|                           |            |       |       |   |                                                                        |                                                 |
|---------------------------|------------|-------|-------|---|------------------------------------------------------------------------|-------------------------------------------------|
| fig 6666666.28482.peg.428 | Contig_104 | 3585  | 2614  | - | Alcohol dehydrogenase,<br>zinc-binding                                 |                                                 |
| fig 6666666.28482.peg.429 | Contig_104 | 4388  | 3723  | - | FIG002283:<br>Isochorismatase family<br>protein                        | FIG00002283 ff                                  |
| fig 6666666.28482.peg.430 | Contig_104 | 6346  | 4451  | - | Exoenzymes regulatory<br>protein AepA precursor                        | FIG00002517 ff                                  |
| fig 6666666.28482.peg.431 | Contig_104 | 7697  | 6684  | - | hypothetical protein                                                   | FIG00638284 ff                                  |
| fig 6666666.28482.peg.432 | Contig_104 | 8686  | 7700  | - | lipase                                                                 |                                                 |
| fig 6666666.28482.peg.433 | Contig_104 | 10303 | 8711  | - | 3-polyprenyl-4-<br>hydroxybenzoate carboxy-<br>lyase (EC 4.1.1.-)      | FIG00000548 icw(1);Ubiquinone_Biosynthesis      |
| fig 6666666.28482.peg.434 | Contig_104 | 10998 | 10363 | - | 3-polyprenyl-4-<br>hydroxybenzoate carboxy-<br>lyase UbiX (EC 4.1.1.-) | FIG00000573 isu;Ubiquinone_Biosynthesis         |
| fig 6666666.28482.peg.435 | Contig_104 | 12473 | 11988 | - | cupin domain protein                                                   |                                                 |
| fig 6666666.28482.peg.436 | Contig_104 | 13221 | 12517 | - | putative oxidoreductase                                                |                                                 |
| fig 6666666.28482.peg.437 | Contig_104 | 13889 | 13239 | - | hypothetical protein                                                   |                                                 |
| fig 6666666.28482.peg.438 | Contig_104 | 14697 | 14008 | - | putative esterase                                                      | idu(2);Alpha-<br>Amylase_locus_in_Streptococcus |
| fig 6666666.28482.peg.439 | Contig_104 | 14968 | 14792 | - | hypothetical protein                                                   |                                                 |
| fig 6666666.28482.peg.440 | Contig_104 | 15770 | 15120 | - | FIG00822234:<br>hypothetical protein                                   | FIG00822233 ff                                  |
| fig 6666666.28482.peg.441 | Contig_104 | 16176 | 15946 | - | FIG00822234:<br>hypothetical protein                                   |                                                 |
| fig 6666666.28482.peg.442 | Contig_104 | 16518 | 18152 | + | hypothetical protein                                                   | FIG00638284 ff                                  |
| fig 6666666.28482.peg.443 | Contig_104 | 18156 | 18440 | + | hypothetical protein                                                   |                                                 |

|                           |            |       |       |   |                           |             |                                |
|---------------------------|------------|-------|-------|---|---------------------------|-------------|--------------------------------|
| fig 6666666.28482.peg.444 | Contig_104 | 18986 | 18552 | - | regulatory protein        |             |                                |
| fig 6666666.28482.peg.445 | Contig_104 | 19100 | 19609 | + | FIG00820972:              | FIG00820970 | ff                             |
|                           |            |       |       |   | hypothetical protein      |             |                                |
| fig 6666666.28482.peg.446 | Contig_104 | 19832 | 20806 | + | Transcriptional regulator | FIG00003657 | ff                             |
|                           |            |       |       |   | containing an amidase     |             |                                |
|                           |            |       |       |   | domain and an AraC-type   |             |                                |
|                           |            |       |       |   | DNA-binding HTH domain    |             |                                |
| fig 6666666.28482.peg.447 | Contig_104 | 20831 | 21847 | + | FIG00828378:              | FIG00828377 | ff                             |
|                           |            |       |       |   | hypothetical protein      |             |                                |
| fig 6666666.28482.peg.448 | Contig_104 | 23051 | 21867 | - | hypothetical protein      | FIG00638284 | ff                             |
| fig 6666666.28482.peg.449 | Contig_104 | 24840 | 23206 | - | acetolactate synthase     |             |                                |
|                           |            |       |       |   | large subunit             |             |                                |
| fig 6666666.28482.peg.450 | Contig_104 | 25639 | 24980 | - | hypothetical protein      | FIG00638284 | ff                             |
| fig 6666666.28482.peg.451 | Contig_104 | 28723 | 25718 | - | INTEGRAL MEMBRANE         | FIG00525068 | ff                             |
|                           |            |       |       |   | PROTEIN (Rhomboid         |             |                                |
|                           |            |       |       |   | family)                   |             |                                |
| fig 6666666.28482.peg.452 | Contig_104 | 28822 | 29328 | + | hypothetical protein      | FIG00638284 | ff                             |
| fig 6666666.28482.peg.453 | Contig_104 | 30347 | 29325 | - | Lon-like protease with    | FIG00051666 | ff                             |
|                           |            |       |       |   | PDZ domain                |             |                                |
| fig 6666666.28482.peg.454 | Contig_104 | 30443 | 31807 | + | Collagen alpha 1(I) chain | FIG00672327 | ff                             |
|                           |            |       |       |   | precursor                 |             |                                |
| fig 6666666.28482.peg.455 | Contig_104 | 31904 | 32623 | + | hypothetical protein      |             |                                |
| fig 6666666.28482.peg.456 | Contig_104 | 32842 | 33639 | + | hypothetical protein      | FIG00638284 | ff                             |
| fig 6666666.28482.peg.457 | Contig_104 | 33695 | 33958 | + | hypothetical protein      |             |                                |
| fig 6666666.28482.peg.458 | Contig_104 | 34509 | 34003 | - | PE family protein         |             |                                |
| fig 6666666.28482.peg.459 | Contig_104 | 34777 | 35637 | + | FIG00822196:              | FIG00822195 | ff                             |
|                           |            |       |       |   | hypothetical protein      |             |                                |
| fig 6666666.28482.peg.460 | Contig_104 | 35715 | 37043 | + | Ubiquinone biosynthesis   | FIG00000320 | idu(1);Ubiquinone_Biosynthesis |
|                           |            |       |       |   | monooxygenase UbiB        |             |                                |

|                           |            |       |       |   |                                                                  |             |                                                                 |
|---------------------------|------------|-------|-------|---|------------------------------------------------------------------|-------------|-----------------------------------------------------------------|
| fig 6666666.28482.peg.461 | Contig_104 | 37356 | 37120 | - | WhiB-family<br>transcriptional regulator                         | FIG00027266 | isu;WhiB_and_WhiB-<br>type_regulatory_proteins_                 |
| fig 6666666.28482.peg.462 | Contig_104 | 37684 | 37523 | - | hypothetical protein                                             |             |                                                                 |
| fig 6666666.28482.peg.463 | Contig_104 | 39927 | 37786 | - | ATP-dependent DNA<br>helicase UvrD/PcrA,<br>actinomycete paralog | FIG00004012 | isu;DNA_repair,_bacterial_UvrD_and<br>_related_helicases        |
| fig 6666666.28482.peg.464 | Contig_104 | 40056 | 40301 | + | POSSIBLE<br>GLUTAREDOXIN PROTEIN                                 | FIG00661781 | ff                                                              |
| fig 6666666.28482.peg.465 | Contig_104 | 41231 | 40308 | - | NADH pyrophosphatase<br>(EC 3.6.1.22)                            | FIG00000911 | isu;Nudix_proteins_(nucleoside_triph<br>osphate_hydrolases)     |
| fig 6666666.28482.peg.466 | Contig_104 | 42308 | 41238 | - | Potassium channel<br>protein                                     | FIG00006661 | idu(2);Potassium_homeostasis                                    |
| fig 6666666.28482.peg.467 | Contig_104 | 44257 | 42314 | - | ATP-dependent DNA<br>helicase SCO5184                            | FIG00137374 | isu;DNA_repair,_bacterial_RecBCD_p<br>athway                    |
| fig 6666666.28482.peg.468 | Contig_105 | 609   | 887   | + | FIG025441: hypothetical<br>protein                               | FIG00824290 | ff                                                              |
| fig 6666666.28482.peg.469 | Contig_105 | 1016  | 1483  | + | FIG00818182:<br>hypothetical protein                             | FIG00672167 | ff                                                              |
| fig 6666666.28482.peg.470 | Contig_105 | 1480  | 2988  | + | Serine/threonine<br>phosphatase PPP (EC<br>3.1.3.16)             | FIG00741411 | ff                                                              |
| fig 6666666.28482.peg.471 | Contig_105 | 2985  | 4394  | + | Cell division protein FtsW                                       | FIG00000025 | icw(1);Bacterial_Cell_Division<br>icw(1);Bacterial_Cytoskeleton |

|                           |            |       |       |   |                                                                               |             |                                                                                                                                                                                                         |
|---------------------------|------------|-------|-------|---|-------------------------------------------------------------------------------|-------------|---------------------------------------------------------------------------------------------------------------------------------------------------------------------------------------------------------|
| fig 6666666.28482.peg.472 | Contig_105 | 4391  | 5869  | + | Cell division protein FtsI<br>[Peptidoglycan<br>synthetase] (EC<br>2.4.1.129) | FIG00046929 | idu(2);Bacterial_Cell_Division<br>idu(2);16S_rRNA_modification_withi<br>n_P_site_of_ribosome<br>idu(2);Flagellum_in_Campylobacter<br>idu(2);Bacterial_Cytoskeleton<br>idu(2);Peptidoglycan_Biosynthesis |
| fig 6666666.28482.peg.473 | Contig_106 | 2357  | 879   | - | hypothetical protein                                                          |             |                                                                                                                                                                                                         |
| fig 6666666.28482.peg.474 | Contig_106 | 3901  | 2354  | - | chain length determinant<br>protein                                           |             |                                                                                                                                                                                                         |
| fig 6666666.28482.peg.475 | Contig_106 | 5020  | 3905  | - | FIG00824412:<br>hypothetical protein                                          | FIG00824410 | ff                                                                                                                                                                                                      |
| fig 6666666.28482.peg.476 | Contig_106 | 6114  | 5017  | - | methyltransferase,<br>putative                                                | FIG00883498 | ff                                                                                                                                                                                                      |
| fig 6666666.28482.peg.477 | Contig_106 | 7352  | 6111  | - | methyltransferase,<br>putative                                                | FIG00883498 | ff                                                                                                                                                                                                      |
| fig 6666666.28482.peg.478 | Contig_106 | 8628  | 7333  | - | hypothetical protein                                                          | FIG00638284 | ff                                                                                                                                                                                                      |
| fig 6666666.28482.peg.479 | Contig_106 | 10799 | 8781  | - | FIG00827174:<br>hypothetical protein                                          | FIG00827173 | ff                                                                                                                                                                                                      |
| fig 6666666.28482.peg.480 | Contig_106 | 12274 | 10796 | - | FIG00829077:<br>hypothetical protein                                          | FIG00829076 | ff                                                                                                                                                                                                      |
| fig 6666666.28482.peg.481 | Contig_106 | 13779 | 12274 | - | Undecaprenyl-phosphate<br>galactosephosphotransfe<br>rase (EC 2.7.8.6)        | FIG00002968 | isu;Exopolysaccharide_Biosynthesis                                                                                                                                                                      |
| fig 6666666.28482.peg.482 | Contig_106 | 14642 | 13797 | - | teichoic acid biosynthesis<br>protein                                         | FIG00828655 | ff                                                                                                                                                                                                      |

|                           |            |       |       |   |                                                        |             |                                                                                                                                                                                                        |
|---------------------------|------------|-------|-------|---|--------------------------------------------------------|-------------|--------------------------------------------------------------------------------------------------------------------------------------------------------------------------------------------------------|
| fig 6666666.28482.peg.483 | Contig_106 | 15242 | 14685 | - | dTDP-4-dehydrorhamnose 3,5-epimerase (EC 5.1.3.13)     | FIG00000408 | icw(1);dTDP-rhamnose_synthesis<br>icw(1);Rhamnose_containing_glycans<br>idu(1);Capsular_heptose_biosynthesis                                                                                           |
| fig 6666666.28482.peg.484 | Contig_106 | 16285 | 15239 | - | UDP-glucose 4-epimerase (EC 5.1.3.2)                   | FIG00022300 | idu(4);Rhamnose_containing_glycans<br>idu(4);Lactose_and_Galactose_Uptake_and_Utilization<br>idu(4);N-linked_Glycosylation_in_Bacteria<br>idu(4);Lacto-N-Biose_I_and_Galacto-N-Biose_Metabolic_Pathway |
| fig 6666666.28482.peg.485 | Contig_106 | 16972 | 16310 | - | FIG01131441: hypothetical protein                      | FIG01131440 | ff                                                                                                                                                                                                     |
| fig 6666666.28482.peg.486 | Contig_106 | 17772 | 16969 | - | Glucose-1-phosphate cytidylyltransferase (EC 2.7.7.33) | FIG00132976 | isu;dTDP-rhamnose_synthesis                                                                                                                                                                            |
| fig 6666666.28482.peg.487 | Contig_106 | 19078 | 17849 | - | PPE family protein                                     | FIG00013075 | idu(57);CBSS-164757.7.peg.5020                                                                                                                                                                         |
| fig 6666666.28482.peg.488 | Contig_106 | 19463 | 19606 | + | hypothetical protein                                   |             |                                                                                                                                                                                                        |
| fig 6666666.28482.peg.489 | Contig_106 | 19603 | 20280 | + | Transcriptional regulator, TetR family                 | FIG00554417 | ff                                                                                                                                                                                                     |
| fig 6666666.28482.peg.490 | Contig_106 | 20413 | 21141 | + | Transcriptional regulator, TetR family                 | FIG00554417 | ff                                                                                                                                                                                                     |
| fig 6666666.28482.peg.491 | Contig_106 | 21565 | 21230 | - | FIG00821141: hypothetical protein                      | FIG00821140 | ff                                                                                                                                                                                                     |
| fig 6666666.28482.peg.492 | Contig_106 | 21822 | 21646 | - | hypothetical protein                                   |             |                                                                                                                                                                                                        |
| fig 6666666.28482.peg.493 | Contig_106 | 23360 | 21819 | - | Methionyl-tRNA synthetase (EC 6.1.1.10)                | FIG01265301 | isu;tRNA_aminoacylation,_Met                                                                                                                                                                           |

|                           |            |       |       |   |                                                                  |             |                                                                                                                                                                                      |
|---------------------------|------------|-------|-------|---|------------------------------------------------------------------|-------------|--------------------------------------------------------------------------------------------------------------------------------------------------------------------------------------|
| fig 6666666.28482.peg.494 | Contig_106 | 23379 | 24242 | + | Putative deoxyribonuclease YcfH                                  | FIG00000184 | isu;YcfH                                                                                                                                                                             |
| fig 6666666.28482.peg.495 | Contig_106 | 24412 | 25539 | + | Cell wall-binding protein                                        | FIG00615230 | ff                                                                                                                                                                                   |
| fig 6666666.28482.peg.496 | Contig_106 | 25512 | 26450 | + | Dimethyladenosine transferase (EC 2.1.1.-)                       | FIG00000225 | ff                                                                                                                                                                                   |
| fig 6666666.28482.peg.497 | Contig_106 | 26466 | 27461 | + | 4-diphosphocytidyl-2-C-methyl-D-erythritol kinase (EC 2.7.1.148) | FIG00000377 | isu;Nonmevalonate_Branch_of_Isoprenoid_Biosynthesis                                                                                                                                  |
| fig 6666666.28482.peg.498 | Contig_106 | 27718 | 29352 | + | Long-chain-fatty-acid--CoA ligase (EC 6.2.1.3)                   | FIG00018699 | isu;Isoprenoid_Biosynthesis<br>idu(72);n-Phenylalkanoic_acid_degradation<br>idu(72);Fatty_acid_metabolism_cluster<br>idu(72);Biotin_synthesis_cluster<br>idu(72);Biotin_biosynthesis |
| fig 6666666.28482.peg.499 | Contig_106 | 30047 | 29439 | - | Transcriptional regulator, TetR family                           | FIG00554417 | ff                                                                                                                                                                                   |
| fig 6666666.28482.peg.500 | Contig_106 | 30126 | 31745 | + | Beta-carotene ketolase (EC 1.14.-.-)                             | FIG00071345 | idu(3);Proteorhodopsin                                                                                                                                                               |
| fig 6666666.28482.peg.501 | Contig_106 | 31742 | 32071 | + | ferredoxin                                                       |             |                                                                                                                                                                                      |
| fig 6666666.28482.peg.502 | Contig_106 | 32068 | 32979 | + | 3-oxoacyl-[acyl-carrier protein] reductase (EC 1.1.1.100)        | FIG00621114 | idu(38);CBSS-246196.1.peg.364<br>icw(1);CBSS-164757.7.peg.5020<br>idu(38);Fatty_Acid_Biosynthesis_FASII                                                                              |

|                           |            |       |       |   |                                                 |             |                                                                                                                                                                                                                           |
|---------------------------|------------|-------|-------|---|-------------------------------------------------|-------------|---------------------------------------------------------------------------------------------------------------------------------------------------------------------------------------------------------------------------|
| fig 6666666.28482.peg.503 | Contig_106 | 33574 | 32999 | - | Peptidyl-tRNA hydrolase (EC 3.1.1.29)           | FIG00000151 | icw(2);Transcription_repair_cluster<br>isu;Cell_division-<br>ribosomal_stress_proteins_cluster<br>isu;Sporulation-<br>associated_proteins_with_broader_f<br>unctions<br>isu;Translation_termination_factors_<br>bacterial |
| fig 6666666.28482.peg.504 | Contig_106 | 34246 | 33587 | - | LSU ribosomal protein L25p                      | FIG00001896 | isu;Ribosome_LSU_bacterial<br>icw(5);Transcription_repair_cluster                                                                                                                                                         |
| fig 6666666.28482.peg.505 | Contig_106 | 35538 | 34657 | - | Short-chain dehydrogenase/reductase SDR         | FIG00546160 | idu(13);CBSS-164757.7.peg.5020<br>idu(13);Transcription_repair_cluster                                                                                                                                                    |
| fig 6666666.28482.peg.506 | Contig_106 | 36200 | 35571 | - | lipoprotein, putative                           | FIG00947911 | ff                                                                                                                                                                                                                        |
| fig 6666666.28482.peg.507 | Contig_106 | 36625 | 36281 | - | Arsenate reductase (EC 1.20.4.1)                | FIG00000770 | icw(4);Transcription_repair_cluster<br>idu(5);CBSS-315749.4.peg.3658<br>idu(5);Arsenic_resistance<br>idu(5);Anaerobic_respiratory_reducta<br>ses                                                                          |
| fig 6666666.28482.peg.508 | Contig_106 | 37606 | 36626 | - | Ribose-phosphate pyrophosphokinase (EC 2.7.6.1) | FIG00096830 | icw(2);Transcription_repair_cluster<br>isu;Pentose_phosphate_pathway<br>isu;De_Novo_Purine_Biosynthesis                                                                                                                   |

|                           |            |       |       |   |                                                                                                                                 |             |                                                                                                                                                                                                                                                                                                                                                  |
|---------------------------|------------|-------|-------|---|---------------------------------------------------------------------------------------------------------------------------------|-------------|--------------------------------------------------------------------------------------------------------------------------------------------------------------------------------------------------------------------------------------------------------------------------------------------------------------------------------------------------|
| fig 6666666.28482.peg.509 | Contig_106 | 39182 | 37704 | - | N-acetylglucosamine-1-phosphate<br>uridyltransferase (EC 2.7.7.23) / Glucosamine-1-phosphate N-acetyltransferase (EC 2.3.1.157) | FIG00000353 | icw(1);Transcription_repair_cluster<br>icw(4);Transcription_repair_cluster<br>isu;Sialic_Acid_Metabolism<br>isu;Sialic_Acid_Metabolism<br>isu;UDP-N-acetylmuramate_from_Fructose-6-phosphate_Biosynthesis<br>isu;UDP-N-acetylmuramate_from_Fructose-6-phosphate_Biosynthesis<br>isu;Peptidoglycan_Biosynthesis<br>isu;Peptidoglycan_Biosynthesis |
| fig 6666666.28482.rna.6   | Contig_106 | 39355 | 39284 | - | tRNA-Gln-TTG                                                                                                                    |             |                                                                                                                                                                                                                                                                                                                                                  |
| fig 6666666.28482.peg.510 | Contig_106 | 39412 | 40092 | + | Transcriptional regulator, TetR family                                                                                          | FIG00554417 | ff                                                                                                                                                                                                                                                                                                                                               |
| fig 6666666.28482.peg.511 | Contig_106 | 40992 | 40099 | - | putative oxidoreductase, short-chain dehydrogenase/reductase family                                                             |             |                                                                                                                                                                                                                                                                                                                                                  |
| fig 6666666.28482.peg.512 | Contig_106 | 42041 | 40995 | - | PROBABLE<br>OXIDOREDUCTASE                                                                                                      | FIG01416034 | ff                                                                                                                                                                                                                                                                                                                                               |
| fig 6666666.28482.peg.513 | Contig_106 | 42646 | 42056 | - | Transcriptional regulator, TetR family                                                                                          | FIG00554417 | ff                                                                                                                                                                                                                                                                                                                                               |
| fig 6666666.28482.peg.514 | Contig_106 | 42782 | 44044 | + | hypothetical protein                                                                                                            | FIG00638284 | ff                                                                                                                                                                                                                                                                                                                                               |
| fig 6666666.28482.peg.515 | Contig_106 | 44041 | 45201 | + | hypothetical protein                                                                                                            | FIG00638284 | ff                                                                                                                                                                                                                                                                                                                                               |
| fig 6666666.28482.peg.516 | Contig_106 | 46548 | 45208 | - | Diaminopimelate decarboxylase (EC 4.1.1.20)                                                                                     | FIG00138250 | idu(2);CBSS-323850.3.peg.3269<br>idu(2);Lysine_Biosynthesis_DAP_Pathway,_GJO_scratch<br>idu(2);Lysine_Biosynthesis_DAP_Pathway                                                                                                                                                                                                                   |

|                           |            |       |       |   |                                                                           |             |                                                                                                                                                                                                                                               |
|---------------------------|------------|-------|-------|---|---------------------------------------------------------------------------|-------------|-----------------------------------------------------------------------------------------------------------------------------------------------------------------------------------------------------------------------------------------------|
| fig 6666666.28482.peg.517 | Contig_106 | 46656 | 50318 | + | Transcription-repair coupling factor                                      | FIG00067681 | isu;Transcription_repair_cluster<br>isu;DNA-replication<br>isu;Cell_division-<br>ribosomal_stress_proteins_cluster<br>isu;Transcription_factors_bacterial                                                                                     |
| fig 6666666.28482.peg.518 | Contig_106 | 50368 | 51414 | + | Nucleoside triphosphate pyrophosphohydrolase MazG (EC 3.6.1.8)            | FIG00002974 | isu;Nucleoside_triphosphate_pyrophosphohydrolase_MazG                                                                                                                                                                                         |
| fig 6666666.28482.peg.519 | Contig_106 | 51744 | 51586 | - | hypothetical protein                                                      |             |                                                                                                                                                                                                                                               |
| fig 6666666.28482.peg.520 | Contig_106 | 51737 | 52327 | + | FIG00997322: hypothetical protein                                         | FIG00997321 | ff                                                                                                                                                                                                                                            |
| fig 6666666.28482.peg.521 | Contig_106 | 52372 | 53661 | + | Enolase (EC 4.2.1.11)                                                     | FIG00000118 | isu;Serine-glyoxylate_cycle                                                                                                                                                                                                                   |
| fig 6666666.28482.peg.522 | Contig_106 | 53787 | 54293 | + | Cell division protein DivIC (FtsB), stabilizes FtsL against RasP cleavage | FIG00485194 | icw(1);Possible_new_toxin-<br>antitoxin_system_including_DivIC<br>idu(10);Bacterial_Cell_Division<br>idu(10);Cell_division-<br>ribosomal_stress_proteins_cluster<br>idu(10);Bacterial_Cytoskeleton<br>idu(10);Stationary_phase_repair_cluster |
| fig 6666666.28482.peg.523 | Contig_106 | 54286 | 54774 | + | FIG004853: possible toxin to DivIC                                        |             | isu;Possible_new_toxin-<br>antitoxin_system_including_DivIC                                                                                                                                                                                   |
| fig 6666666.28482.peg.524 | Contig_106 | 54768 | 55712 | + | Exopolyphosphatase (EC 3.6.1.11)                                          | FIG00066575 | idu(2);Polyphosphate<br>idu(2);Phosphate_metabolism                                                                                                                                                                                           |
| fig 6666666.28482.peg.525 | Contig_107 | 538   | 71    | - | Lipoprotein LppP                                                          | FIG00820809 | ff                                                                                                                                                                                                                                            |
| fig 6666666.28482.peg.526 | Contig_107 | 831   | 5006  | + | Assimilatory nitrate reductase large subunit (EC:1.7.99.4)                | FIG00059898 | idu(1);Nitrate_and_nitrite_ammonification                                                                                                                                                                                                     |

|                           |            |       |       |   |                                                            |                                                                                 |
|---------------------------|------------|-------|-------|---|------------------------------------------------------------|---------------------------------------------------------------------------------|
| fig 6666666.28482.peg.527 | Contig_107 | 5208  | 5384  | + | hypothetical protein                                       |                                                                                 |
| fig 6666666.28482.peg.528 | Contig_107 | 5814  | 5374  | - | protein of unknown function DUF417                         |                                                                                 |
| fig 6666666.28482.peg.529 | Contig_107 | 6353  | 5871  | - | hypothetical protein                                       |                                                                                 |
| fig 6666666.28482.peg.530 | Contig_107 | 6982  | 6416  | - | hypothetical protein                                       |                                                                                 |
| fig 6666666.28482.peg.531 | Contig_107 | 7106  | 7681  | + | Transcriptional regulator, TetR family                     |                                                                                 |
| fig 6666666.28482.peg.532 | Contig_107 | 8254  | 7697  | - | hypothetical protein                                       | FIG00638284 ff                                                                  |
| fig 6666666.28482.peg.533 | Contig_107 | 8344  | 9279  | + | protein of unknown function DUF6, transmembrane            |                                                                                 |
| fig 6666666.28482.peg.534 | Contig_107 | 9345  | 10991 | + | NAD-dependent malic enzyme (EC 1.1.1.38)                   | FIG00000835 isu;Pyruvate_metabolism_I:_anaplerotic_reactions,_PEP               |
| fig 6666666.28482.peg.535 | Contig_107 | 11489 | 10995 | - | FIG00822322: hypothetical protein                          | FIG00822320 ff                                                                  |
| fig 6666666.28482.peg.536 | Contig_107 | 12076 | 11486 | - | MCE associated membrane protein                            | FIG00820195 ff                                                                  |
| fig 6666666.28482.peg.537 | Contig_107 | 12618 | 12073 | - | FIG00821219: hypothetical protein                          | FIG00821218 ff                                                                  |
| fig 6666666.28482.peg.538 | Contig_107 | 14114 | 12636 | - | MCE-family protein Mce1F                                   | FIG00821171 idu(7);Mycobacterium_virulence_operon_MCE_involved_in_cell_invasion |
| fig 6666666.28482.peg.539 | Contig_107 | 15223 | 14114 | - | MCE-family lipoprotein LprK (MCE-family lipoprotein Mce1e) | FIG00819998 icw(3);Mycobacterium_virulence_operon_MCE_involved_in_cell_invasion |
| fig 6666666.28482.peg.540 | Contig_107 | 16572 | 15232 | - | MCE-family protein Mce1D                                   | FIG00820669 icw(1);Mycobacterium_virulence_operon_MCE_involved_in_cell_invasion |
| fig 6666666.28482.peg.541 | Contig_107 | 17741 | 16569 | - | MCE-family protein Mce1C                                   | FIG00821293 icw(7);Mycobacterium_virulence_operon_MCE_involved_in_cell_invasion |

|                           |            |       |       |   |                                                                    |             |                                                                                                                                                                             |
|---------------------------|------------|-------|-------|---|--------------------------------------------------------------------|-------------|-----------------------------------------------------------------------------------------------------------------------------------------------------------------------------|
| fig 6666666.28482.peg.542 | Contig_107 | 18754 | 17738 | - | MCE-family protein Mce1B                                           | FIG00763551 | icw(6);Mycobacterium_virulence_op<br>eron_MCE_involved_in_cell_invasion                                                                                                     |
| fig 6666666.28482.peg.543 | Contig_107 | 20034 | 18766 | - | MCE-family protein Mce1A                                           | FIG00820494 | icw(2);Mycobacterium_virulence_op<br>eron_MCE_involved_in_cell_invasion                                                                                                     |
| fig 6666666.28482.peg.544 | Contig_107 | 20887 | 20039 | - | Conserved hypothetical integral membrane protein YrbE1B            | FIG00691621 | icw(3);Mycobacterium_virulence_op<br>eron_MCE_involved_in_cell_invasion                                                                                                     |
| fig 6666666.28482.peg.545 | Contig_107 | 21651 | 20884 | - | Conserved hypothetical integral membrane protein YrbE1A            | FIG00690583 | idu(7);Mycobacterium_virulence_ope<br>ron_MCE_involved_in_cell_invasion                                                                                                     |
| fig 6666666.28482.peg.546 | Contig_107 | 23773 | 21884 | - | Cysteine desulfurase (EC 2.8.1.7)                                  | FIG00000001 | idu(2);Iron-sulfur_cluster_assembly<br>idu(2);CBSS-84588.1.peg.1247<br>idu(2);CBSS-393130.3.peg.794<br>idu(2);mnm5U34_biosynthesis_bacte<br>ria idu(2);Alanine_biosynthesis |
| fig 6666666.28482.peg.547 | Contig_107 | 24692 | 23760 | - | Major membrane protein I                                           | FIG01153610 | ff                                                                                                                                                                          |
| fig 6666666.28482.peg.548 | Contig_107 | 25082 | 26359 | + | Unknown function. Previously sequenced as TR:O32977 (EMBL:Z98741). | FIG01328012 | ff                                                                                                                                                                          |
| fig 6666666.28482.peg.549 | Contig_107 | 26369 | 27301 | + | Cysteine synthase (EC 2.5.1.47)                                    | FIG00064110 | icw(1);Cysteine_Biosynthesis                                                                                                                                                |
| fig 6666666.28482.peg.550 | Contig_107 | 27304 | 27987 | + | Serine acetyltransferase (EC 2.3.1.30)                             | FIG00000128 | isu;Cysteine_Biosynthesis<br>isu;Conserved_gene_cluster_possibly<br>_involved_in_RNA_metabolism                                                                             |

|                           |            |       |       |   |                                                                             |             |                                                                        |
|---------------------------|------------|-------|-------|---|-----------------------------------------------------------------------------|-------------|------------------------------------------------------------------------|
| fig 6666666.28482.peg.551 | Contig_107 | 28233 | 28514 | + | hypothetical protein                                                        |             |                                                                        |
| fig 6666666.28482.peg.552 | Contig_107 | 28801 | 28502 | - | Muconolactone isomerase (EC 5.3.3.4)                                        | FIG00002342 | isu;Catechol_branch_of_beta-ketoadipate_pathway                        |
| fig 6666666.28482.rna.7   | Contig_107 | 28956 | 28884 | - | tRNA-Asn-GTT                                                                |             |                                                                        |
| fig 6666666.28482.peg.553 | Contig_107 | 29108 | 29386 | + | FIG00820230:                                                                | FIG00820227 | ff                                                                     |
|                           |            |       |       |   | hypothetical protein                                                        |             |                                                                        |
| fig 6666666.28482.peg.554 | Contig_107 | 31295 | 29361 | - | DNA primase (EC 2.7.7.-)                                                    | FIG00019251 | isu;CBSS-349161.4.peg.2417 isu;DNA-replication                         |
| fig 6666666.28482.peg.555 | Contig_107 | 31922 | 31323 | - | Superoxide dismutase [Cu-Zn] precursor (EC 1.15.1.1)                        | FIG00001181 | idu(2);Oxidative_stress idu(2);Protection_from_Reactive_Oxygen_Species |
| fig 6666666.28482.peg.556 | Contig_107 | 33201 | 31933 | - | Deoxyguanosinetriphosphate triphosphohydrolase (EC 3.1.5.1)                 | FIG00023004 | ff                                                                     |
| fig 6666666.28482.peg.557 | Contig_107 | 33242 | 35245 | + | Possible membrane protein                                                   | FIG01121868 | ff                                                                     |
| fig 6666666.28482.peg.558 | Contig_107 | 35285 | 35404 | + | hypothetical protein                                                        |             |                                                                        |
| fig 6666666.28482.peg.559 | Contig_108 | 349   | 50    | - | PE family protein                                                           | FIG01313150 | ff                                                                     |
| fig 6666666.28482.peg.560 | Contig_109 | 1946  | 165   | - | Long-chain fatty-acid-CoA ligase (EC 6.2.1.3), Mycobacterial subgroup FadD6 | FIG01953996 | ff                                                                     |
| fig 6666666.28482.peg.561 | Contig_109 | 2537  | 1995  | - | Lysine decarboxylase family                                                 | FIG01349038 | ff                                                                     |
| fig 6666666.28482.peg.562 | Contig_11  | 2947  | 1532  | - | PE family protein                                                           |             |                                                                        |
| fig 6666666.28482.peg.563 | Contig_11  | 4288  | 3236  | - | PE-PGRS family protein                                                      |             | idu(16);PPE_gene_cluster_in_Mycobacteria                               |
| fig 6666666.28482.peg.564 | Contig_11  | 6149  | 4623  | - | hypothetical protein                                                        | FIG00638284 | ff                                                                     |
| fig 6666666.28482.peg.565 | Contig_11  | 8045  | 6495  | - | hypothetical protein                                                        | FIG00638284 | ff                                                                     |
| fig 6666666.28482.peg.566 | Contig_11  | 9747  | 8326  | - | hypothetical protein                                                        | FIG00638284 | ff                                                                     |

|                           |           |       |       |   |                                                        |                 |                                                                                                                                                          |
|---------------------------|-----------|-------|-------|---|--------------------------------------------------------|-----------------|----------------------------------------------------------------------------------------------------------------------------------------------------------|
| fig 6666666.28482.peg.567 | Contig_11 | 12341 | 9855  | - | Phenylalanyl-tRNA synthetase beta chain (EC 6.1.1.20)  | FIG00000116     | icw(1);tRNA_aminoacylation,_Phe                                                                                                                          |
| fig 6666666.28482.peg.568 | Contig_11 | 13384 | 12341 | - | Phenylalanyl-tRNA synthetase alpha chain (EC 6.1.1.20) | FIG00000098     | isu;tRNA_aminoacylation,_Phe                                                                                                                             |
| fig 6666666.28482.peg.569 | Contig_11 | 14315 | 13509 | - | Possible membrane protein                              | FIG01121868     | ff                                                                                                                                                       |
| fig 6666666.28482.peg.570 | Contig_11 | 15257 | 14334 | - | Purine cyclase-related protein                         | FIG00026664     | isu;cAMP_signaling_in_bacteria                                                                                                                           |
| fig 6666666.28482.peg.571 | Contig_11 | 16278 | 15376 | - | PE FAMILY PROTEIN                                      | FIG00820092:    | FIG00820090 ff                                                                                                                                           |
| fig 6666666.28482.peg.572 | Contig_11 | 16523 | 17581 | + | hypothetical protein                                   |                 |                                                                                                                                                          |
| fig 6666666.28482.peg.573 | Contig_11 | 18299 | 17595 | - | PE-PGRS FAMILY PROTEIN [FIRST PART]                    | FIG011178: rRNA | FIG01289107 isu;RNA_methylation                                                                                                                          |
| fig 6666666.28482.peg.574 | Contig_11 | 19241 | 18456 | - | methylase                                              |                 |                                                                                                                                                          |
| fig 6666666.28482.peg.575 | Contig_11 | 19637 | 19251 | - | LSU ribosomal protein L20p                             | FIG00000216     | icw(1);Ribosome_LSU_bacterial<br>icw(2);Mycobacterium_virulence_op<br>eron_involved_in_protein_synthesis_<br>(LSU_ribosomal_proteins)                    |
| fig 6666666.28482.peg.576 | Contig_11 | 19899 | 19705 | - | LSU ribosomal protein L35p                             | FIG00000259     | isu;Ribosome_LSU_bacterial<br>isu;Mycobacterium_virulence_opero<br>n_involved_in_protein_synthesis_(LS<br>U_ribosomal_proteins)                          |
| fig 6666666.28482.peg.577 | Contig_11 | 20497 | 19973 | - | Translation initiation factor 3                        | FIG00000206     | isu;Translation_initiation_factors_bac<br>terial<br>icw(1);Mycobacterium_virulence_op<br>eron_involved_in_protein_synthesis_<br>(LSU_ribosomal_proteins) |

|                           |           |       |       |   |                                                                                                                                                                |             |                                                              |
|---------------------------|-----------|-------|-------|---|----------------------------------------------------------------------------------------------------------------------------------------------------------------|-------------|--------------------------------------------------------------|
| fig 6666666.28482.peg.578 | Contig_11 | 20987 | 24322 | + | Putative membrane protein found fused to lysyl-tRNA synthetase like protein / Lysyl-tRNA synthetase (class II) related protein found fused to membrane protein | FIG00009947 | isu;tRNA_aminoacylation,_Lys<br>isu;tRNA_aminoacylation,_Lys |
| fig 6666666.28482.peg.579 | Contig_11 | 24471 | 24319 | - | hypothetical protein                                                                                                                                           |             |                                                              |
| fig 6666666.28482.peg.580 | Contig_11 | 24466 | 25875 | + | FIG00824695:                                                                                                                                                   | FIG01366795 | ff                                                           |
| fig 6666666.28482.peg.581 | Contig_11 | 26560 | 25856 | - | hypothetical protein<br>Dienelactone hydrolase family                                                                                                          | FIG01069253 | ff                                                           |
| fig 6666666.28482.peg.582 | Contig_11 | 26705 | 27355 | + | Transcriptional regulator, TetR family                                                                                                                         | FIG00554417 | ff                                                           |
| fig 6666666.28482.peg.583 | Contig_11 | 27384 | 29546 | + | POSSIBLE<br>MOLYBDOPTERIN<br>BIOSYNTHESIS PROTEIN<br>MOEY                                                                                                      | FIG00824264 | ff                                                           |
| fig 6666666.28482.peg.584 | Contig_11 | 30421 | 29552 | - | hypothetical protein                                                                                                                                           | FIG00638284 | ff                                                           |
| fig 6666666.28482.peg.585 | Contig_11 | 30630 | 32000 | + | putative cytochrome P450                                                                                                                                       | FIG00866649 | ff                                                           |
| fig 6666666.28482.peg.586 | Contig_11 | 32515 | 34422 | + | FIG00822590:                                                                                                                                                   | FIG01753111 | ff                                                           |
| fig 6666666.28482.peg.587 | Contig_11 | 35152 | 34430 | - | hypothetical protein<br>FIG00822093:                                                                                                                           | FIG00822089 | ff                                                           |
| fig 6666666.28482.peg.588 | Contig_11 | 35967 | 35251 | - | hypothetical protein<br>FIG00826287:                                                                                                                           | FIG00826286 | ff                                                           |
| fig 6666666.28482.peg.589 | Contig_11 | 36731 | 37009 | + | hypothetical protein                                                                                                                                           | FIG00638284 | ff                                                           |
| fig 6666666.28482.peg.590 | Contig_11 | 37019 | 37258 | + | FIG00820127:                                                                                                                                                   | FIG00820126 | ff                                                           |
| fig 6666666.28482.peg.591 | Contig_11 | 37260 | 38450 | + | hypothetical protein<br>hypothetical protein                                                                                                                   |             |                                                              |

|                           |           |       |       |   |                                                                       |             |                                                                                                              |
|---------------------------|-----------|-------|-------|---|-----------------------------------------------------------------------|-------------|--------------------------------------------------------------------------------------------------------------|
| fig 6666666.28482.peg.592 | Contig_11 | 41424 | 38512 | - | Excinuclease ABC subunit A                                            | FIG00000147 | isu;DNA_repair,_UvrABC_system                                                                                |
| fig 6666666.28482.peg.593 | Contig_11 | 41655 | 42230 | + | metallo-beta-lactamase superfamily protein                            | FIG01193879 | ff                                                                                                           |
| fig 6666666.28482.peg.594 | Contig_11 | 42791 | 42351 | - | Universal stress protein UspA and related nucleotide-binding proteins | FIG01023736 | ff                                                                                                           |
| fig 6666666.28482.peg.595 | Contig_11 | 43099 | 44682 | + | Possible membrane protein                                             | FIG01121868 | ff                                                                                                           |
| fig 6666666.28482.peg.596 | Contig_11 | 44722 | 45441 | + | FIG00828037: hypothetical protein                                     | FIG01336641 | ff                                                                                                           |
| fig 6666666.28482.peg.597 | Contig_11 | 46844 | 45444 | - | Drug efflux membrane protein                                          | FIG01387845 | ff                                                                                                           |
| fig 6666666.28482.peg.598 | Contig_11 | 49009 | 46841 | - | Excinuclease ABC subunit B                                            | FIG00000146 | isu;DNA_repair,_UvrABC_system                                                                                |
| fig 6666666.28482.peg.599 | Contig_11 | 48989 | 49132 | + | hypothetical protein                                                  |             |                                                                                                              |
| fig 6666666.28482.peg.600 | Contig_11 | 51254 | 49212 | - | Serine/threonine protein kinase (EC 2.7.11.1)                         | FIG00933379 | ff                                                                                                           |
| fig 6666666.28482.peg.601 | Contig_11 | 51431 | 54106 | + | ABC transporter, ATP-binding protein                                  | FIG00744535 | ff                                                                                                           |
| fig 6666666.28482.peg.602 | Contig_11 | 54865 | 54119 | - | 3-oxoacyl-[acyl-carrier protein] reductase (EC 1.1.1.100)             | FIG00621114 | idu(38);CBSS-246196.1.peg.364<br>idu(38);CBSS-164757.7.peg.5020<br>idu(38);Fatty_Acid_Biosynthesis_FASI<br>I |
| fig 6666666.28482.peg.603 | Contig_11 | 55007 | 55447 | + | hypothetical protein                                                  |             |                                                                                                              |
| fig 6666666.28482.peg.604 | Contig_11 | 55485 | 55922 | + | hypothetical protein                                                  |             |                                                                                                              |

|                           |           |       |       |   |                                                                                |             |                                                                                                                                                     |
|---------------------------|-----------|-------|-------|---|--------------------------------------------------------------------------------|-------------|-----------------------------------------------------------------------------------------------------------------------------------------------------|
| fig 6666666.28482.peg.605 | Contig_11 | 55919 | 56917 | + | ATP-dependent DNA<br>ligase (EC 6.5.1.1)<br>clustered with Ku<br>protein, LigD | FIG00002268 | icw(1);DNA_Repair_Base_Excision<br>icw(1);DNA_ligases<br>icw(1);Nonhomologous_End-<br>Joining_in_Bacteria<br>icw(1);Bacillus_subtilis_scratch_-_gjo |
| fig 6666666.28482.peg.606 | Contig_11 | 56914 | 57801 | + | ATP-dependent DNA<br>ligase (EC 6.5.1.1)<br>clustered with Ku<br>protein, LigD | FIG00002268 | icw(1);DNA_Repair_Base_Excision<br>icw(1);DNA_ligases<br>icw(1);Nonhomologous_End-<br>Joining_in_Bacteria<br>icw(1);Bacillus_subtilis_scratch_-_gjo |
| fig 6666666.28482.peg.607 | Contig_11 | 57794 | 58573 | + | DNA-<br>formamidopyrimidine<br>glycosylase( EC:3.2.2.23 )                      | FIG01524345 | ff                                                                                                                                                  |
| fig 6666666.28482.peg.608 | Contig_11 | 58585 | 59001 | + | FIG00827185:<br>hypothetical protein                                           | FIG00827183 | ff                                                                                                                                                  |
| fig 6666666.28482.peg.609 | Contig_11 | 60367 | 59153 | - | Dephospho-CoA kinase<br>(EC 2.7.1.24)                                          | FIG00000267 | isu;Coenzyme_A_Biosynthesis                                                                                                                         |
| fig 6666666.28482.peg.610 | Contig_11 | 61825 | 60380 | - | SSU ribosomal protein<br>S1p                                                   | FIG00000210 | isu;Cell_division-<br>ribosomal_stress_proteins_cluster                                                                                             |
| fig 6666666.28482.peg.611 | Contig_11 | 61835 | 62032 | + | hypothetical protein                                                           | FIG00000404 | idu(1);DNA_Repair_Base_Excision<br>idu(1);DNA-replication                                                                                           |
| fig 6666666.28482.peg.612 | Contig_11 | 64770 | 62029 | - | DNA polymerase I (EC<br>2.7.7.7)                                               |             |                                                                                                                                                     |
| fig 6666666.28482.peg.613 | Contig_11 | 65087 | 64800 | - | Uncharacterized<br>conserved protein                                           | FIG01340511 | ff                                                                                                                                                  |
| fig 6666666.28482.peg.614 | Contig_11 | 65219 | 65662 | + | FIG00823085:<br>hypothetical protein                                           | FIG00823077 | ff                                                                                                                                                  |
| fig 6666666.28482.peg.615 | Contig_11 | 65659 | 66858 | + | Probable nonspecific lipid-<br>transfer protein                                | FIG01418201 | ff                                                                                                                                                  |
| fig 6666666.28482.peg.616 | Contig_11 | 67702 | 67052 | - | response regulator                                                             | FIG00826122 | ff                                                                                                                                                  |

|                           |           |       |       |   |                                                         |                                                                                                    |
|---------------------------|-----------|-------|-------|---|---------------------------------------------------------|----------------------------------------------------------------------------------------------------|
| fig 6666666.28482.rna.8   | Contig_11 | 67776 | 67849 | + | tRNA-Leu-CAA                                            | isu;tRNAs                                                                                          |
| fig 6666666.28482.peg.617 | Contig_11 | 67860 | 68372 | + | hypothetical protein                                    | FIG00638284 ff                                                                                     |
| fig 6666666.28482.peg.618 | Contig_11 | 68398 | 69726 | + | Adenylate cyclase (EC 4.6.1.1)                          | FIG00001294 idu(25);cAMP_signaling_in_bacteria                                                     |
| fig 6666666.28482.peg.619 | Contig_11 | 69823 | 70368 | + | Possible membrane protein                               | FIG01121868 ff                                                                                     |
| fig 6666666.28482.peg.620 | Contig_11 | 70412 | 71878 | + | Cytochrome d ubiquinol oxidase subunit I (EC 1.10.3.-)  | FIG00096593 isu;Terminal_cytochrome_d_ubiquinol_oxidases<br>isu;Terminal_cytochrome_oxidases       |
| fig 6666666.28482.peg.621 | Contig_11 | 71890 | 72930 | + | Cytochrome d ubiquinol oxidase subunit II (EC 1.10.3.-) | FIG00000390 icw(1);Terminal_cytochrome_d_ubiquinol_oxidases<br>icw(1);Terminal_cytochrome_oxidases |
| fig 6666666.28482.peg.622 | Contig_11 | 72987 | 74600 | + | Transport ATP-binding protein CydD                      | FIG01010650 icw(2);Terminal_cytochrome_d_ubiquinol_oxidases<br>icw(2);Terminal_cytochrome_oxidases |
| fig 6666666.28482.peg.623 | Contig_11 | 74587 | 76236 | + | Transport ATP-binding protein CydC                      | FIG00046358 icw(3);Terminal_cytochrome_d_ubiquinol_oxidases<br>icw(3);Terminal_cytochrome_oxidases |
| fig 6666666.28482.peg.624 | Contig_11 | 77605 | 76211 | - | Putative membrane protein MT1655                        | FIG01531367 ff                                                                                     |
| fig 6666666.28482.peg.625 | Contig_11 | 78636 | 77755 | - | Acyl-CoA thioesterase II (EC 3.1.2.-)                   | FIG00002217 idu(3);Acyl-CoA_thioesterase_II                                                        |
| fig 6666666.28482.peg.626 | Contig_11 | 80009 | 78648 | - | Pyruvate kinase (EC 2.7.1.40)                           | FIG00000043 isu;Glycerate_metabolism<br>isu;Pyruvate_metabolism_I:_anaplerotic_reactions,_PEP      |
| fig 6666666.28482.peg.627 | Contig_11 | 80534 | 80130 | - | Possible membrane protein                               | FIG01121868 ff                                                                                     |
| fig 6666666.28482.peg.628 | Contig_11 | 80793 | 80548 | - | FIG00822583:<br>hypothetical protein                    | FIG00822582 ff                                                                                     |

|                           |           |       |       |   |                                                         |             |                                                                                                                                                     |
|---------------------------|-----------|-------|-------|---|---------------------------------------------------------|-------------|-----------------------------------------------------------------------------------------------------------------------------------------------------|
| fig 6666666.28482.peg.629 | Contig_11 | 82849 | 80999 | - | Prolipoprotein diacylglyceryl transferase (EC 2.4.99.-) | FIG00000985 | isu;Lipoprotein_Biosynthesis                                                                                                                        |
| fig 6666666.28482.peg.630 | Contig_11 | 83661 | 82846 | - | Tryptophan synthase alpha chain (EC 4.2.1.20)           | FIG00105533 | isu;Chorismate:_Intermediate_for_synthesis_of_Tryptophan,_PAPA_antibiotics,_PABA,_3-hydroxyanthranilate_and_more.<br>isu;Tryptophan_synthesis       |
| fig 6666666.28482.peg.631 | Contig_11 | 84920 | 83658 | - | Tryptophan synthase beta chain (EC 4.2.1.20)            | FIG00116323 | icw(1);Chorismate:_Intermediate_for_synthesis_of_Tryptophan,_PAPA_antibiotics,_PABA,_3-hydroxyanthranilate_and_more.<br>icw(1);Tryptophan_synthesis |
| fig 6666666.28482.peg.632 | Contig_11 | 85775 | 84957 | - | Indole-3-glycerol phosphate synthase (EC 4.1.1.48)      | FIG00135159 | icw(2);Chorismate:_Intermediate_for_synthesis_of_Tryptophan,_PAPA_antibiotics,_PABA,_3-hydroxyanthranilate_and_more.<br>icw(2);Tryptophan_synthesis |
| fig 6666666.28482.peg.633 | Contig_11 | 86534 | 85875 | - | FIG00997095:<br>hypothetical protein                    | FIG00997093 | ff                                                                                                                                                  |
| fig 6666666.28482.peg.634 | Contig_11 | 88065 | 86527 | - | Anthranilate synthase, aminase component (EC 4.1.3.27)  | FIG00011663 | icw(3);Chorismate:_Intermediate_for_synthesis_of_Tryptophan,_PAPA_antibiotics,_PABA,_3-hydroxyanthranilate_and_more.<br>icw(3);Tryptophan_synthesis |
| fig 6666666.28482.peg.635 | Contig_11 | 88169 | 88642 | + | Alkyl hydroperoxide reductase subunit C-like protein    | FIG01258694 | idu(1);Oxidative_stress<br>idu(1);Rubrerythrin<br>idu(1);Thioredoxin-disulfide_reductase                                                            |
| fig 6666666.28482.peg.636 | Contig_11 | 89828 | 88725 | - | Calcium/proton antiporter                               | FIG00634903 | ff                                                                                                                                                  |

|                           |           |       |       |   |                                                                                                                                                    |             |                                                                                                                                                                             |
|---------------------------|-----------|-------|-------|---|----------------------------------------------------------------------------------------------------------------------------------------------------|-------------|-----------------------------------------------------------------------------------------------------------------------------------------------------------------------------|
| fig 6666666.28482.peg.637 | Contig_11 | 90717 | 89893 | - | O-Methyltransferase involved in polyketide biosynthesis                                                                                            |             |                                                                                                                                                                             |
| fig 6666666.28482.peg.638 | Contig_11 | 91582 | 90725 | - | Transcriptional regulator, AraC family                                                                                                             | FIG00510130 | ff                                                                                                                                                                          |
| fig 6666666.28482.peg.639 | Contig_11 | 91639 | 93165 | + | Serine/threonine protein kinase (EC 2.7.11.1)                                                                                                      | FIG00933379 | ff                                                                                                                                                                          |
| fig 6666666.28482.peg.640 | Contig_11 | 93509 | 93162 | - | Phosphoribosyl-AMP cyclohydrolase (EC 3.5.4.19)                                                                                                    | FIG01303889 | icw(6);Histidine_Biosynthesis                                                                                                                                               |
| fig 6666666.28482.peg.641 | Contig_11 | 94291 | 93506 | - | Imidazole glycerol phosphate synthase cyclase subunit (EC 4.1.3.-)                                                                                 | FIG00000258 | icw(5);Histidine_Biosynthesis                                                                                                                                               |
| fig 6666666.28482.peg.642 | Contig_11 | 95105 | 94293 | - | Histidinol-phosphatase [alternative form] (EC 3.1.3.15)                                                                                            | FIG00001748 | icw(2);Histidine_Biosynthesis                                                                                                                                               |
| fig 6666666.28482.peg.643 | Contig_11 | 95841 | 95110 | - | Phosphoribosylformimin o-5-aminoimidazole carboxamide ribotide isomerase (EC 5.3.1.16) / Acting phosphoribosylanthranilate isomerase (EC 5.3.1.24) | FIG00137296 | isu;Chorismate:_Intermediate_for_synthesis_of_Tryptophan,_PAPA_antibiotics,_PABA,_3-hydroxyanthranilate_and_more.<br>isu;Histidine_Biosynthesis<br>isu;Tryptophan_synthesis |
| fig 6666666.28482.peg.644 | Contig_11 | 96541 | 95924 | - | Imidazole glycerol phosphate synthase amidotransferase subunit (EC 2.4.2.-)                                                                        | FIG00010738 | icw(1);Histidine_Biosynthesis                                                                                                                                               |

|                           |           |        |        |   |                                                                       |             |                                                                                                                                         |
|---------------------------|-----------|--------|--------|---|-----------------------------------------------------------------------|-------------|-----------------------------------------------------------------------------------------------------------------------------------------|
| fig 6666666.28482.peg.645 | Contig_11 | 97155  | 96538  | - | Imidazoleglycerol-phosphate dehydratase (EC 4.2.1.19)                 | FIG00000601 | icw(4);Histidine_Biosynthesis                                                                                                           |
| fig 6666666.28482.peg.646 | Contig_11 | 98288  | 97152  | - | Histidinol-phosphate aminotransferase (EC 2.6.1.9)                    | FIG00000474 | icw(3);Histidine_Biosynthesis                                                                                                           |
| fig 6666666.28482.peg.647 | Contig_11 | 99643  | 98285  | - | Histidinol dehydrogenase (EC 1.1.1.23)                                | FIG00000303 | icw(5);Histidine_Biosynthesis                                                                                                           |
| fig 6666666.28482.peg.648 | Contig_11 | 100317 | 99703  | - | hypothetical protein                                                  |             |                                                                                                                                         |
| fig 6666666.28482.peg.649 | Contig_11 | 100577 | 100990 | + | FIG00820654: hypothetical protein                                     | FIG00820653 | ff                                                                                                                                      |
| fig 6666666.28482.peg.650 | Contig_11 | 102133 | 101105 | - | putative dehydrogenase                                                | FIG01127283 | ff                                                                                                                                      |
| fig 6666666.28482.peg.651 | Contig_11 | 102174 | 102740 | + | Transcriptional regulator, TetR family                                |             | ff                                                                                                                                      |
| fig 6666666.28482.peg.652 | Contig_11 | 103139 | 102726 | - | hypothetical protein                                                  |             |                                                                                                                                         |
| fig 6666666.28482.peg.653 | Contig_11 | 103222 | 104025 | + | possible transcriptional regulator, AraC family                       |             |                                                                                                                                         |
| fig 6666666.28482.peg.654 | Contig_11 | 104330 | 104758 | + | hypothetical protein                                                  |             |                                                                                                                                         |
| fig 6666666.28482.peg.655 | Contig_11 | 105633 | 104779 | - | Quinolinate phosphoribosyltransferase [decarboxylating] (EC 2.4.2.19) | FIG00000413 | icw(1);Mycobacterium_virulence_operon_possibly_involved_in_quinolinate_biosynthesis<br>icw(2);NAD_and_NADP_cofactor_biosynthesis_global |
| fig 6666666.28482.peg.656 | Contig_11 | 107210 | 105636 | - | L-aspartate oxidase (EC 1.4.3.16)                                     | FIG00000575 | icw(2);Mycobacterium_virulence_operon_possibly_involved_in_quinolinate_biosynthesis<br>icw(3);NAD_and_NADP_cofactor_biosynthesis_global |

|                           |           |        |        |   |                                              |             |                                                                                                                                   |
|---------------------------|-----------|--------|--------|---|----------------------------------------------|-------------|-----------------------------------------------------------------------------------------------------------------------------------|
| fig 6666666.28482.peg.657 | Contig_11 | 108256 | 107207 | - | Quinolinate synthetase (EC 2.5.1.72)         | FIG00000463 | isu;Mycobacterium_virulence_operon_possibly_involved_in_quinolinate_biosynthesis<br>isu;NAD_and_NADP_cofactor_biosynthesis_global |
| fig 6666666.28482.peg.658 | Contig_11 | 108393 | 109010 | + | Nudix-related transcriptional regulator NrtR | FIG00017495 | icw(1);NAD_and_NADP_cofactor_biosynthesis_global                                                                                  |
| fig 6666666.28482.peg.659 | Contig_11 | 109167 | 110507 | + | Lipase 1 (EC 3.1.1.3)                        | FIG01327998 | ff                                                                                                                                |
| fig 6666666.28482.peg.660 | Contig_11 | 111311 | 110652 | - | Possible membrane protein                    | FIG01121868 | ff                                                                                                                                |
| fig 6666666.28482.peg.661 | Contig_11 | 111535 | 111308 | - | FIG00820826: hypothetical protein            | FIG00820825 | ff                                                                                                                                |
| fig 6666666.28482.peg.662 | Contig_11 | 112589 | 111549 | - | Biotin synthase (EC 2.8.1.6)                 | FIG00000467 | isu;Biotin_biosynthesis_Experimental<br>isu;Biotin_synthesis_cluster<br>isu;Biotin_biosynthesis                                   |
| fig 6666666.28482.peg.663 | Contig_11 | 112731 | 112922 | + | hypothetical protein                         |             |                                                                                                                                   |
| fig 6666666.28482.peg.664 | Contig_11 | 113001 | 114839 | + | FIG00830155: hypothetical protein            | FIG00830153 | ff                                                                                                                                |
| fig 6666666.28482.peg.665 | Contig_11 | 114844 | 115206 | + | FIG00827828: hypothetical protein            | FIG00827827 | ff                                                                                                                                |
| fig 6666666.28482.peg.666 | Contig_11 | 115203 | 116567 | + | FIG00829768: hypothetical protein            | FIG00829766 | ff                                                                                                                                |
| fig 6666666.28482.peg.667 | Contig_11 | 117177 | 116671 | - | FIG00820026: hypothetical protein            | FIG00820025 | ff                                                                                                                                |
| fig 6666666.28482.peg.668 | Contig_11 | 117851 | 117177 | - | Dethiobiotin synthetase (EC 6.3.3.3)         | FIG00000423 | isu;Biotin_biosynthesis_Experimental<br>isu;Biotin_synthesis_cluster<br>isu;Biotin_biosynthesis                                   |

|                           |            |        |        |   |                                               |             |                                                                                                                                                                             |
|---------------------------|------------|--------|--------|---|-----------------------------------------------|-------------|-----------------------------------------------------------------------------------------------------------------------------------------------------------------------------|
| fig 6666666.28482.peg.669 | Contig_11  | 119008 | 117848 | - | 8-amino-7-oxononanoate synthase (EC 2.3.1.47) | FIG00051001 | icw(1);Biotin_biosynthesis_Experimental icw(1);Biotin_synthesis_cluster icw(1);Biotin_biosynthesis                                                                          |
| fig 6666666.28482.peg.670 | Contig_11  | 119802 | 119047 | - | Collagen triple helix repeat                  |             |                                                                                                                                                                             |
| fig 6666666.28482.peg.671 | Contig_110 | 35     | 376    | + | transcriptional regulator, TetR family        |             |                                                                                                                                                                             |
| fig 6666666.28482.peg.672 | Contig_110 | 1850   | 381    | - | Aldehyde dehydrogenase (EC 1.2.1.3)           | FIG01292786 | idu(16);Pyruvate_metabolism_II:_acetyl-CoA,_acetogenesis_from_pyruvate idu(16);Glycerolipid_and_Glycerophospholipid_Metabolism_in_Bacteria idu(16);Methylglyoxal_Metabolism |
| fig 6666666.28482.peg.673 | Contig_110 | 2712   | 1945   | - | POSSIBLE METHYLTRANSFERASE (METHYLASE)        | FIG01121659 | ff                                                                                                                                                                          |
| fig 6666666.28482.peg.674 | Contig_110 | 3913   | 2738   | - | hypothetical protein                          | FIG00638284 | ff                                                                                                                                                                          |
| fig 6666666.28482.peg.675 | Contig_110 | 4253   | 5407   | + | Glycosyltransferase (EC 2.4.1.-)              | FIG01193496 | ff                                                                                                                                                                          |
| fig 6666666.28482.peg.676 | Contig_110 | 7076   | 5391   | - | Possible membrane protein                     | FIG01121868 | ff                                                                                                                                                                          |
| fig 6666666.28482.peg.677 | Contig_110 | 8384   | 7086   | - | PROBABLE CONSERVED MEMBRANE PROTEIN           | FIG00662487 | ff                                                                                                                                                                          |
| fig 6666666.28482.peg.678 | Contig_110 | 8531   | 9700   | + | Lysophospholipid acyltransferase              | FIG00149539 | ff                                                                                                                                                                          |
| fig 6666666.28482.peg.679 | Contig_110 | 10175  | 9702   | - | hypothetical protein                          |             |                                                                                                                                                                             |

|                           |            |       |       |   |                                                                           |             |                                                                                                                                                            |
|---------------------------|------------|-------|-------|---|---------------------------------------------------------------------------|-------------|------------------------------------------------------------------------------------------------------------------------------------------------------------|
| fig 6666666.28482.peg.680 | Contig_110 | 11721 | 10249 | - | Long-chain-fatty-acid--<br>CoA ligase (EC 6.2.1.3)                        | FIG00018699 | idu(72);n-<br>Phenylalkanoic_acid_degradation<br>idu(72);Fatty_acid_metabolism_clust<br>er idu(72);Biotin_synthesis_cluster<br>idu(72);Biotin_biosynthesis |
| fig 6666666.28482.peg.681 | Contig_110 | 12698 | 11718 | - | Phosphotriesterase<br>homology protein                                    | FIG01324117 | ff                                                                                                                                                         |
| fig 6666666.28482.peg.682 | Contig_110 | 14176 | 13466 | - | hypothetical protein                                                      |             |                                                                                                                                                            |
| fig 6666666.28482.peg.683 | Contig_110 | 15439 | 14189 | - | Argininosuccinate lyase<br>(EC 4.3.2.1)                                   | FIG00000333 | idu(1);Arginine_Biosynthesis_--_gjo<br>idu(1);Arginine_Biosynthesis_extende<br>d                                                                           |
| fig 6666666.28482.peg.684 | Contig_110 | 15980 | 15456 | - | Putative transcriptional<br>regulator                                     |             |                                                                                                                                                            |
| fig 6666666.28482.peg.685 | Contig_110 | 16871 | 15996 | - | Citrate lyase beta chain<br>(EC 4.1.3.6)                                  | FIG00010100 | idu(2);Citrate_Metabolism,_Transpor<br>t,_and_Regulation                                                                                                   |
| fig 6666666.28482.peg.686 | Contig_110 | 18157 | 16898 | - | 2-amino-3-ketobutyrate<br>coenzyme A ligase (EC<br>2.3.1.29)              | FIG00000741 | isu;Glycine_Biosynthesis                                                                                                                                   |
| fig 6666666.28482.peg.687 | Contig_110 | 18324 | 19211 | + | hypothetical protein                                                      | FIG00638284 | ff                                                                                                                                                         |
| fig 6666666.28482.peg.688 | Contig_110 | 19281 | 20990 | + | Acyl-CoA dehydrogenase<br>(EC 1.3.99.3)                                   | FIG00002266 | ff                                                                                                                                                         |
| fig 6666666.28482.peg.689 | Contig_110 | 21168 | 21830 | + | Transcriptional regulator,<br>TetR family                                 | FIG00554417 | ff                                                                                                                                                         |
| fig 6666666.28482.peg.690 | Contig_110 | 21827 | 22768 | + | Ribonucleotide-<br>diphosphate reductase<br>subunit beta (EC<br>1.17.4.1) | FIG01313305 | ff                                                                                                                                                         |

|                           |            |       |       |   |                                                                                                                      |             |                                                                         |
|---------------------------|------------|-------|-------|---|----------------------------------------------------------------------------------------------------------------------|-------------|-------------------------------------------------------------------------|
| fig 6666666.28482.peg.691 | Contig_110 | 24202 | 22784 | - | Succinate-semialdehyde dehydrogenase [NAD] (EC 1.2.1.24); Succinate-semialdehyde dehydrogenase [NADP+] (EC 1.2.1.16) | FIG01959002 | ff                                                                      |
| fig 6666666.28482.peg.692 | Contig_110 | 24283 | 25929 | + | COG0028: Thiamine pyrophosphate-requiring enzymes                                                                    | FIG00452446 | ff                                                                      |
| fig 6666666.28482.peg.693 | Contig_111 | 66    | 920   | + | MCE-family lipoprotein LprK (MCE-family lipoprotein Mce1e)                                                           | FIG00819998 | icw(1);Mycobacterium_virulence_op<br>eron_MCE_involved_in_cell_invasion |
| fig 6666666.28482.peg.694 | Contig_111 | 921   | 2600  | + | MCE-family protein Mce1F                                                                                             | FIG00821171 | idu(7);Mycobacterium_virulence_ope<br>ron_MCE_involved_in_cell_invasion |
| fig 6666666.28482.peg.695 | Contig_111 | 3149  | 2634  | - | FIG00822490: hypothetical protein                                                                                    | FIG00822486 | ff                                                                      |
| fig 6666666.28482.peg.696 | Contig_111 | 3812  | 3237  | - | FIG00820816: hypothetical protein                                                                                    | FIG00820815 | ff                                                                      |
| fig 6666666.28482.peg.697 | Contig_111 | 4549  | 3809  | - | hypothetical protein                                                                                                 |             |                                                                         |
| fig 6666666.28482.peg.698 | Contig_111 | 4764  | 5117  | + | FIG00828565: hypothetical protein                                                                                    | FIG00828564 | ff                                                                      |
| fig 6666666.28482.peg.699 | Contig_111 | 5409  | 5134  | - | SECRETED PROTEIN ANTIGEN                                                                                             | FIG01357523 | ff                                                                      |
| fig 6666666.28482.peg.700 | Contig_111 | 6051  | 5470  | - | Transcriptional regulator, TetR family                                                                               | FIG00554417 | ff                                                                      |
| fig 6666666.28482.peg.701 | Contig_111 | 6157  | 6942  | + | FIG00820623: hypothetical protein                                                                                    | FIG00820622 | ff                                                                      |
| fig 6666666.28482.peg.702 | Contig_111 | 7017  | 7745  | + | FIG00822891: hypothetical protein                                                                                    | FIG00822890 | ff                                                                      |

|                           |            |       |       |   |                                                                |             |                                                                                                                                              |
|---------------------------|------------|-------|-------|---|----------------------------------------------------------------|-------------|----------------------------------------------------------------------------------------------------------------------------------------------|
| fig 6666666.28482.peg.703 | Contig_111 | 7742  | 8314  | + | Cytochrome c oxidase polypeptide III (EC 1.9.3.1)              | FIG00000640 | idu(1);Terminal_cytochrome_C_oxidas idu(1);CBSS-316057.3.peg.563                                                                             |
| fig 6666666.28482.peg.704 | Contig_111 | 8311  | 8601  | + | FIG00825808: hypothetical protein                              | FIG00825806 | ff                                                                                                                                           |
| fig 6666666.28482.peg.705 | Contig_112 | 81    | 1745  | + | hypothetical protein                                           | FIG00638284 | ff                                                                                                                                           |
| fig 6666666.28482.peg.706 | Contig_112 | 1849  | 2778  | + | DrrA                                                           |             |                                                                                                                                              |
| fig 6666666.28482.peg.707 | Contig_112 | 2775  | 3536  | + | ABC-2 type transporter                                         |             |                                                                                                                                              |
| fig 6666666.28482.peg.708 | Contig_112 | 3533  | 4321  | + | ABC-2 type transporter                                         |             |                                                                                                                                              |
| fig 6666666.28482.peg.709 | Contig_112 | 4346  | 5620  | + | GtfA                                                           | FIG01525338 | ff                                                                                                                                           |
| fig 6666666.28482.peg.710 | Contig_112 | 5644  | 5757  | + | hypothetical protein                                           |             |                                                                                                                                              |
| fig 6666666.28482.peg.711 | Contig_112 | 5754  | 12287 | + | Long-chain-fatty-acid--CoA ligase (EC 6.2.1.3)                 | FIG00018699 | idu(72);n-Phenylalkanoic_acid_degradation idu(72);Fatty_acid_metabolism_cluster idu(72);Biotin_synthesis_cluster idu(72);Biotin_biosynthesis |
| fig 6666666.28482.peg.712 | Contig_112 | 12338 | 14521 | + | O-antigen acetylase                                            | FIG01370327 | ff                                                                                                                                           |
| fig 6666666.28482.peg.713 | Contig_112 | 15983 | 14526 | - | Glucose-methanol-choline (GMC) oxidoreductase:NAD binding site | FIG00001629 | idu(3);Respiratory_dehydrogenases_1                                                                                                          |
| fig 6666666.28482.peg.714 | Contig_113 | 1766  | 219   | - | PPE family protein                                             | FIG00013075 | idu(57);CBSS-164757.7.peg.5020                                                                                                               |
| fig 6666666.28482.peg.715 | Contig_113 | 1803  | 1916  | + | hypothetical protein                                           |             |                                                                                                                                              |

|                           |            |      |      |   |                                                                                                                                                                                   |             |                                                                                     |
|---------------------------|------------|------|------|---|-----------------------------------------------------------------------------------------------------------------------------------------------------------------------------------|-------------|-------------------------------------------------------------------------------------|
| fig 6666666.28482.peg.716 | Contig_113 | 2130 | 5360 | + | Adenylyl cyclase class-3/4/guanylyl cyclase / Disease resistance domain-containing protein / Tetratricopeptide repeat-containing protein / Transcriptional regulator, LuxR family | FIG01386132 | ff                                                                                  |
| fig 6666666.28482.peg.717 | Contig_113 | 5672 | 5454 | - | hypothetical protein                                                                                                                                                              |             |                                                                                     |
| fig 6666666.28482.peg.718 | Contig_114 | 348  | 479  | + | hypothetical protein                                                                                                                                                              |             |                                                                                     |
| fig 6666666.28482.peg.719 | Contig_114 | 553  | 1509 | + | Prephenate dehydratase (EC 4.2.1.51)                                                                                                                                              | FIG00341289 | isu;Chorismate_Synthesis<br>isu;Phenylalanine_and_Tyrosine_Branches_from_Chorismate |
| fig 6666666.28482.peg.720 | Contig_114 | 1521 | 2192 | + | putative phosphoglycerate mutase                                                                                                                                                  | FIG00997142 | ff                                                                                  |
| fig 6666666.28482.peg.721 | Contig_114 | 2768 | 2418 | - | FIG00820873: hypothetical protein                                                                                                                                                 | FIG00820872 | ff                                                                                  |
| fig 6666666.28482.peg.722 | Contig_114 | 4149 | 2773 | - | PROBABLE CONSERVED MEMBRANE PROTEIN                                                                                                                                               | FIG00662487 | ff                                                                                  |
| fig 6666666.28482.peg.723 | Contig_114 | 4262 | 5515 | + | Seryl-tRNA synthetase (EC 6.1.1.11)                                                                                                                                               | FIG00000121 | isu;tRNA_aminoacylation,_Ser<br>isu;CBSS-326442.4.peg.1852                          |
| fig 6666666.28482.peg.724 | Contig_114 | 6030 | 5512 | - | FIG00445285: hypothetical protein                                                                                                                                                 | FIG00445283 | ff                                                                                  |
| fig 6666666.28482.peg.725 | Contig_114 | 6152 | 6454 | + | putative transcriptional regulatory protein, related to MarR family                                                                                                               |             |                                                                                     |
| fig 6666666.28482.peg.726 | Contig_114 | 6935 | 6456 | - | FIG00821485: hypothetical protein                                                                                                                                                 | FIG00821484 | ff                                                                                  |

|                           |            |       |       |   |                                                              |             |                                                                                                                                                             |
|---------------------------|------------|-------|-------|---|--------------------------------------------------------------|-------------|-------------------------------------------------------------------------------------------------------------------------------------------------------------|
| fig 6666666.28482.peg.727 | Contig_114 | 7007  | 7615  | + | Beta-carotene ketolase (EC 1.14.-.-)                         | FIG00071345 | icw(1);Proteorhodopsin                                                                                                                                      |
| fig 6666666.28482.peg.728 | Contig_114 | 7683  | 9245  | + | Beta-carotene ketolase (EC 1.14.-.-)                         | FIG00071345 | icw(1);Proteorhodopsin                                                                                                                                      |
| fig 6666666.28482.peg.729 | Contig_114 | 9586  | 9242  | - | Putative uncharacterized protein BCG_3881                    | FIG01318042 | ff                                                                                                                                                          |
| fig 6666666.28482.peg.730 | Contig_114 | 11133 | 9583  | - | Rieske (2Fe-2S) domain protein                               | FIG00999265 | ff                                                                                                                                                          |
| fig 6666666.28482.peg.731 | Contig_114 | 11273 | 12046 | + | 1-acyl-sn-glycerol-3-phosphate acyltransferase (EC 2.3.1.51) | FIG00005243 | icw(2);Glycerolipid_and_Glycerophospholipid_Metabolism_in_Bacteria<br>icw(2);Ribosome_post-transcriptional_modification_and_chromosomal_segregation_cluster |
| fig 6666666.28482.peg.732 | Contig_114 | 12046 | 12813 | + | 1-acyl-sn-glycerol-3-phosphate acyltransferase (EC 2.3.1.51) | FIG00005243 | icw(2);Glycerolipid_and_Glycerophospholipid_Metabolism_in_Bacteria<br>icw(2);Ribosome_post-transcriptional_modification_and_chromosomal_segregation_cluster |
| fig 6666666.28482.peg.733 | Contig_114 | 12830 | 13615 | + | 1-acyl-sn-glycerol-3-phosphate acyltransferase (EC 2.3.1.51) | FIG00005243 | icw(2);Glycerolipid_and_Glycerophospholipid_Metabolism_in_Bacteria<br>icw(2);Ribosome_post-transcriptional_modification_and_chromosomal_segregation_cluster |
| fig 6666666.28482.peg.734 | Contig_114 | 13635 | 14450 | + | Cof family hydrolase                                         | FIG01362030 | ff                                                                                                                                                          |
| fig 6666666.28482.peg.735 | Contig_114 | 15982 | 14447 | - | PE_PGRS family protein                                       |             |                                                                                                                                                             |
| fig 6666666.28482.peg.736 | Contig_114 | 17693 | 16086 | - | Putative uncharacterized protein BCG_3873                    | FIG00994577 | ff                                                                                                                                                          |

|                           |            |       |       |   |                                                                                           |             |                                                                                                                                                        |
|---------------------------|------------|-------|-------|---|-------------------------------------------------------------------------------------------|-------------|--------------------------------------------------------------------------------------------------------------------------------------------------------|
| fig 6666666.28482.peg.737 | Contig_115 | 709   | 1437  | + | hypothetical protein                                                                      | FIG00638284 | ff                                                                                                                                                     |
| fig 6666666.28482.peg.738 | Contig_115 | 2314  | 1505  | - | COG1376:<br>Uncharacterized protein<br>conserved in bacteria                              |             |                                                                                                                                                        |
| fig 6666666.28482.peg.739 | Contig_115 | 2519  | 4357  | + | Pyruvate decarboxylase<br>(EC 4.1.1.1); Alpha-keto-<br>acid decarboxylase (EC<br>4.1.1.-) | FIG00001998 | idu(2);Pyruvate_metabolism_II:_acet<br>yl-CoA,_acetogenesis_from_pyruvate                                                                              |
| fig 6666666.28482.peg.740 | Contig_115 | 6094  | 4370  | - | Possible membrane<br>protein                                                              | FIG01121868 | ff                                                                                                                                                     |
| fig 6666666.28482.peg.741 | Contig_115 | 6621  | 6166  | - | hypothetical protein                                                                      |             |                                                                                                                                                        |
| fig 6666666.28482.peg.742 | Contig_115 | 6776  | 7585  | + | Long-chain-fatty-acid--<br>CoA ligase (EC 6.2.1.3)                                        | FIG00018699 | icw(1);n-<br>Phenylalkanoic_acid_degradation<br>icw(1);Fatty_acid_metabolism_cluste<br>r icw(1);Biotin_synthesis_cluster<br>icw(1);Biotin_biosynthesis |
| fig 6666666.28482.peg.743 | Contig_115 | 7589  | 9232  | + | Long-chain-fatty-acid--<br>CoA ligase (EC 6.2.1.3)                                        | FIG00018699 | icw(1);n-<br>Phenylalkanoic_acid_degradation<br>icw(1);Fatty_acid_metabolism_cluste<br>r icw(1);Biotin_synthesis_cluster<br>icw(1);Biotin_biosynthesis |
| fig 6666666.28482.peg.744 | Contig_115 | 9232  | 10500 | + | Lipase (EC 3.1.1.3)                                                                       | FIG01320296 | ff                                                                                                                                                     |
| fig 6666666.28482.peg.745 | Contig_115 | 10639 | 11484 | + | FIG00826634:<br>hypothetical protein                                                      | FIG00826633 | ff                                                                                                                                                     |

|                           |            |       |       |   |                                                                    |             |                                                                                                                                                                                                                                                                                                                                                   |
|---------------------------|------------|-------|-------|---|--------------------------------------------------------------------|-------------|---------------------------------------------------------------------------------------------------------------------------------------------------------------------------------------------------------------------------------------------------------------------------------------------------------------------------------------------------|
| fig 6666666.28482.peg.746 | Contig_115 | 12886 | 11549 | - | Wax ester synthase/acyl-CoA:diacylglycerol acyltransferase         | FIG01309728 | ff                                                                                                                                                                                                                                                                                                                                                |
| fig 6666666.28482.peg.747 | Contig_115 | 12881 | 13000 | + | hypothetical protein                                               |             |                                                                                                                                                                                                                                                                                                                                                   |
| fig 6666666.28482.peg.748 | Contig_115 | 13980 | 12997 | - | hypothetical protein                                               |             |                                                                                                                                                                                                                                                                                                                                                   |
| fig 6666666.28482.peg.749 | Contig_115 | 14996 | 13971 | - | FIG002813: LPPG:FO 2-phospho-L-lactate transferase like, CofD-like |             |                                                                                                                                                                                                                                                                                                                                                   |
| fig 6666666.28482.peg.750 | Contig_115 | 15868 | 14993 | - | FIG000506: Predicted P-loop-containing kinase                      |             |                                                                                                                                                                                                                                                                                                                                                   |
| fig 6666666.28482.peg.751 | Contig_115 | 17808 | 15865 | - | Excinuclease ABC subunit C                                         | FIG00000185 | isu;DNA_repair,_UvrABC_system                                                                                                                                                                                                                                                                                                                     |
| fig 6666666.28482.peg.752 | Contig_115 | 18972 | 19136 | + | Enoyl-CoA hydratase (EC 4.2.1.17)                                  |             | idu(51);n-Phenylalkanoic_acid_degradation<br>idu(51);Polyhydroxybutyrate_metabolism<br>idu(51);Isoleucine_degradation<br>idu(51);Fatty_acid_metabolism_cluster<br>idu(51);Lysine_fermentation<br>idu(51);Butanol_Biosynthesis<br>idu(51);Acetyl-CoA_fermentation_to_Butyrate<br>idu(51);Valine_degradation<br>idu(51);Butyrate_metabolism_cluster |
| fig 6666666.28482.peg.753 | Contig_115 | 19878 | 19210 | - | Lipoprotein LprH                                                   | FIG01346249 | ff                                                                                                                                                                                                                                                                                                                                                |

|                           |            |       |       |   |                                                                                                    |             |                                                                                                                                                                                                                             |
|---------------------------|------------|-------|-------|---|----------------------------------------------------------------------------------------------------|-------------|-----------------------------------------------------------------------------------------------------------------------------------------------------------------------------------------------------------------------------|
| fig 6666666.28482.peg.754 | Contig_115 | 20307 | 19897 | - | Cell division protein DivIC (FtsB), stabilizes FtsL against RasP cleavage                          | FIG00485194 | idu(10);Possible_new_toxin-antitoxin_system_including_DivIC idu(10);Bacterial_Cell_Division idu(10);Cell_division-ribosomal_stress_proteins_cluster idu(10);Bacterial_Cytoskeleton idu(10);Stationary_phase_repair_cluster  |
| fig 6666666.28482.peg.755 | Contig_115 | 20813 | 20358 | - | 6,7-dimethyl-8-ribityllumazine synthase (EC 2.5.1.78)                                              | FIG00000231 | isu;Riboflavin_synthesis_cluster icw(1);Riboflavin,_FMN_and_FAD_m etabolism                                                                                                                                                 |
| fig 6666666.28482.peg.756 | Contig_115 | 22141 | 20837 | - | 3,4-dihydroxy-2-butanone 4-phosphate synthase (EC 4.1.99.12) / GTP cyclohydrolase II (EC 3.5.4.25) |             | icw(2);Riboflavin_synthesis_cluster icw(3);Riboflavin_synthesis_cluster icw(3);Riboflavin,_FMN_and_FAD_m etabolism icw(3);Riboflavin,_FMN_and_FAD_m etabolism icw(1);riboflavin_to_FAD isu;Molybdenum_cofactor_biosynthesis |
| fig 6666666.28482.peg.757 | Contig_115 | 22307 | 22678 | + | secreted protein antigen                                                                           |             |                                                                                                                                                                                                                             |
| fig 6666666.28482.peg.758 | Contig_115 | 23343 | 22738 | - | Riboflavin synthase eubacterial/eukaryotic (EC 2.5.1.9)                                            | FIG00000273 | icw(4);Riboflavin_synthesis_cluster isu;Riboflavin,_FMN_and_FAD_m etabolism isu;riboflavin_to_FAD                                                                                                                           |
| fig 6666666.28482.peg.759 | Contig_115 | 23515 | 24135 | + | Lipoprotein LprG                                                                                   | FIG01327396 | ff                                                                                                                                                                                                                          |

|                           |            |       |       |   |                                                                                                                                         |             |                                                                                                                                                            |
|---------------------------|------------|-------|-------|---|-----------------------------------------------------------------------------------------------------------------------------------------|-------------|------------------------------------------------------------------------------------------------------------------------------------------------------------|
| fig 6666666.28482.peg.760 | Contig_115 | 24132 | 25694 | + | EmrB/QacA family drug resistance transporter                                                                                            | FIG00997405 | ff                                                                                                                                                         |
| fig 6666666.28482.peg.761 | Contig_115 | 26726 | 25698 | - | Diaminohydroxyphospho ribosylaminopyrimidine deaminase (EC 3.5.4.26) / 5-amino-6-(5-phosphoribosylamino)uracil reductase (EC 1.1.1.193) | FIG00000384 | isu;Riboflavin_synthesis_cluster icw(3);Riboflavin_synthesis_cluster icw(1);Riboflavin,_FMN_and_FAD_m etabolism icw(1);Riboflavin,_FMN_and_FAD_m etabolism |
| fig 6666666.28482.peg.762 | Contig_115 | 27421 | 26723 | - | Ribulose-phosphate 3-epimerase (EC 5.1.3.1)                                                                                             | FIG00000047 | icw(1);Riboflavin_synthesis_cluster isu;Pentose_phosphate_pathway                                                                                          |
| fig 6666666.28482.peg.763 | Contig_115 | 28559 | 27450 | - | Ribosomal RNA small subunit methyltransferase B (EC 2.1.1.-)                                                                            | FIG00138175 | ff                                                                                                                                                         |
| fig 6666666.28482.peg.764 | Contig_116 | 25    | 150   | + | hypothetical protein                                                                                                                    |             |                                                                                                                                                            |
| fig 6666666.28482.peg.765 | Contig_116 | 255   | 1103  | + | hypothetical protein                                                                                                                    |             |                                                                                                                                                            |
| fig 6666666.28482.peg.766 | Contig_116 | 2816  | 1158  | - | Ubiquinol--cytochrome c reductase, cytochrome B subunit (EC 1.10.2.2)                                                                   | FIG00000754 | icw(2);Ubiquinone_Menaquinone-cytochrome_c_reductase_complexes                                                                                             |
| fig 6666666.28482.peg.767 | Contig_116 | 4015  | 2813  | - | Ubiquinol-cytochrome C reductase iron-sulfur subunit (EC 1.10.2.2)                                                                      | FIG00000797 | icw(1);Ubiquinone_Menaquinone-cytochrome_c_reductase_complexes                                                                                             |

|                           |            |      |      |   |                                                              |             |                                                                                                                                            |
|---------------------------|------------|------|------|---|--------------------------------------------------------------|-------------|--------------------------------------------------------------------------------------------------------------------------------------------|
| fig 6666666.28482.peg.768 | Contig_116 | 4752 | 3991 | - | ubiquinol cytochrome C oxidoreductase, cytochrome C1 subunit | FIG00001102 | isu;Ubiquinone_Menaquinone-cytochrome_c_reductase_complexes                                                                                |
| fig 6666666.28482.peg.769 | Contig_116 | 5492 | 4893 | - | Cytochrome c oxidase polypeptide III (EC 1.9.3.1)            | FIG00000640 | idu(1);Terminal_cytochrome_C_oxidas idu(1);CBSS-316057.3.peg.563                                                                           |
| fig 6666666.28482.peg.770 | Contig_116 | 5643 | 6725 | + | Anthranilate phosphoribosyltransferase (EC 2.4.2.18)         | FIG00062957 | isu;Chorismate:_Intermediate_for_synthesis_of_Tryptophan,_PAPA_antibiotics,_PABA,_3-hydroxyanthranilate_and_more. isu;Tryptophan_synthesis |
| fig 6666666.28482.peg.771 | Contig_117 | 1604 | 1314 | - | FIG00820970: hypothetical protein                            | FIG00820967 | ff                                                                                                                                         |
| fig 6666666.28482.peg.772 | Contig_117 | 1680 | 3383 | + | Dihydroxy-acid dehydratase (EC 4.2.1.9)                      | FIG00138258 | isu;Branched-Chain_Amino_Acid_Biosynthesis                                                                                                 |
| fig 6666666.28482.peg.773 | Contig_117 | 3873 | 3433 | - | PROBABLE CONSERVED TRANSMEMBRANE PROTEIN                     | FIG00662132 | ff                                                                                                                                         |
| fig 6666666.28482.peg.774 | Contig_117 | 3983 | 4972 | + | FIG00831487: hypothetical protein                            | FIG00831485 | ff                                                                                                                                         |
| fig 6666666.28482.peg.775 | Contig_117 | 5636 | 4977 | - | O-methyltransferase                                          | FIG00821228 | ff                                                                                                                                         |
| fig 6666666.28482.peg.776 | Contig_117 | 5725 | 5871 | + | FIG00821308: hypothetical protein                            | FIG00821306 | ff                                                                                                                                         |
| fig 6666666.28482.peg.777 | Contig_117 | 7702 | 5903 | - | Beta-glucosidase (EC 3.2.1.21)                               | FIG00001469 | isu;Beta-Glucoside_Metabolism                                                                                                              |
| fig 6666666.28482.peg.778 | Contig_118 | 3374 | 1509 | - | FIG00824757: hypothetical protein                            | FIG00824754 | ff                                                                                                                                         |
| fig 6666666.28482.peg.779 | Contig_118 | 3627 | 4421 | + | FIG00826773: hypothetical protein                            | FIG00826770 | ff                                                                                                                                         |

|                           |            |      |      |   |                                                              |             |                                                                                                                                                                          |
|---------------------------|------------|------|------|---|--------------------------------------------------------------|-------------|--------------------------------------------------------------------------------------------------------------------------------------------------------------------------|
| fig 6666666.28482.peg.780 | Contig_118 | 4509 | 5696 | + | NADH dehydrogenase (EC 1.6.99.3)                             | FIG00008708 | idu(6);Respiratory_dehydrogenases_1<br>idu(6);PPE_gene_cluster_in_Mycobacteria<br>idu(6);Riboflavin_synthesis_cluster                                                    |
| fig 6666666.28482.peg.781 | Contig_118 | 5693 | 6604 | + | FIG00826795:<br>hypothetical protein                         | FIG00826794 | ff                                                                                                                                                                       |
| fig 6666666.28482.peg.782 | Contig_118 | 6621 | 7874 | + | Para-aminobenzoate synthase, aminase component (EC 2.6.1.85) | FIG00341164 | isu;Chorismate:_Intermediate_for_synthesis_of_Tryptophan,_PAPA_antibiotics,_PABA,_3-hydroxyanthranilate_and_more.<br>isu;Folate_Biosynthesis<br>isu;Tryptophan_synthesis |
| fig 6666666.28482.peg.783 | Contig_119 | 994  | 1581 | + | hypothetical protein                                         | FIG00638284 | ff                                                                                                                                                                       |
| fig 6666666.28482.peg.784 | Contig_119 | 3074 | 1590 | - | Acetyl-CoA acetyltransferase                                 | FIG00832423 | ff                                                                                                                                                                       |
| fig 6666666.28482.peg.785 | Contig_119 | 5617 | 3209 | - | Acyl-CoA transferases/carnitine dehydratase                  | FIG01313105 | ff                                                                                                                                                                       |
| fig 6666666.28482.peg.786 | Contig_119 | 5772 | 6674 | + | Undecaprenyl-diphosphatase (EC 3.6.1.27)                     | FIG00000555 | ff                                                                                                                                                                       |
| fig 6666666.28482.peg.787 | Contig_119 | 7216 | 6671 | - | GCN5-related N-acetyltransferase                             | FIG01272034 | ff                                                                                                                                                                       |
| fig 6666666.28482.peg.788 | Contig_119 | 7246 | 8094 | + | Oxidoreductase, short-chain dehydrogenase/reductase family   | FIG00993242 | ff                                                                                                                                                                       |

|                           |            |       |       |   |                                                                                                       |             |                                                                                                                                          |
|---------------------------|------------|-------|-------|---|-------------------------------------------------------------------------------------------------------|-------------|------------------------------------------------------------------------------------------------------------------------------------------|
| fig 6666666.28482.peg.789 | Contig_119 | 8310  | 10697 | + | Xylulose-5-phosphate phosphoketolase (EC 4.1.2.9); Fructose-6-phosphate phosphoketolase (EC 4.1.2.22) | FIG00137542 | isu;Fermentations:_Lactate<br>isu;Fermentations:_Lactate<br>isu;Pentose_phosphate_pathway<br>isu;Pentose_phosphate_pathway               |
| fig 6666666.28482.peg.790 | Contig_119 | 10933 | 12153 | + | PPE family protein                                                                                    | FIG00013075 | idu(57);CBSS-164757.7.peg.5020                                                                                                           |
| fig 6666666.28482.peg.791 | Contig_119 | 12408 | 12241 | - | hypothetical protein                                                                                  |             |                                                                                                                                          |
| fig 6666666.28482.peg.792 | Contig_119 | 12490 | 13071 | + | hypothetical protein                                                                                  |             |                                                                                                                                          |
| fig 6666666.28482.peg.793 | Contig_119 | 13628 | 14371 | + | Possible membrane protein                                                                             | FIG01121868 | ff                                                                                                                                       |
| fig 6666666.28482.peg.794 | Contig_119 | 15404 | 14376 | - | Alcohol dehydrogenase (EC 1.1.1.1)                                                                    | FIG01007502 | idu(17);Glycerolipid_and_Glycerophospholipid_Metabolism_in_Bacteria<br>idu(17);Fermentations:_Mixed_acid<br>idu(17);Butanol_Biosynthesis |
| fig 6666666.28482.peg.795 | Contig_119 | 15752 | 15453 | - | hypothetical protein                                                                                  | FIG00638284 | ff                                                                                                                                       |
| fig 6666666.28482.peg.796 | Contig_119 | 16989 | 15961 | - | Alanine and proline-rich secreted protein Apa, fibronectin attachment protein                         | FIG00822366 | ff                                                                                                                                       |
| fig 6666666.28482.peg.797 | Contig_119 | 18184 | 17087 | - | Molybdenum transport ATP-binding protein ModC (TC 3.A.1.8.1)                                          | FIG00002742 | isu;Molybdenum_cofactor_biosynthesis                                                                                                     |
| fig 6666666.28482.peg.798 | Contig_119 | 18942 | 18181 | - | Molybdenum transport system permease protein ModB (TC 3.A.1.8.1)                                      | FIG00002718 | icw(1);Molybdenum_cofactor_biosynthesis                                                                                                  |

|                           |            |       |       |   |                                                                                        |             |                                                                                                                       |
|---------------------------|------------|-------|-------|---|----------------------------------------------------------------------------------------|-------------|-----------------------------------------------------------------------------------------------------------------------|
| fig 6666666.28482.peg.799 | Contig_119 | 19075 | 21696 | + | Disease resistance domain-containing protein / Transcriptional regulator, LuxR family  |             |                                                                                                                       |
| fig 6666666.28482.peg.800 | Contig_119 | 22494 | 21709 | - | Molybdenum ABC transporter, periplasmic molybdenum-binding protein ModA (TC 3.A.1.8.1) | FIG00021644 | icw(2);Molybdenum_cofactor_biosynthesis                                                                               |
| fig 6666666.28482.peg.801 | Contig_119 | 22714 | 23385 | + | Oxidoreductase, short-chain dehydrogenase/reductase family                             | FIG00993242 | ff                                                                                                                    |
| fig 6666666.28482.peg.802 | Contig_119 | 23431 | 24357 | + | Oxidoreductase                                                                         | FIG01321859 | ff                                                                                                                    |
| fig 6666666.28482.peg.803 | Contig_119 | 24533 | 25915 | + | NADH dehydrogenase (EC 1.6.99.3)                                                       | FIG00008708 | idu(6);Respiratory_dehydrogenases_1<br>idu(6);PPE_gene_cluster_in_Mycobacteria<br>idu(6);Riboflavin_synthesis_cluster |
| fig 6666666.28482.peg.804 | Contig_119 | 26569 | 26153 | - | Putative esterase                                                                      | FIG00998593 | ff                                                                                                                    |
| fig 6666666.28482.peg.805 | Contig_119 | 26865 | 27284 | + | Transcriptional regulator, Blal family                                                 | FIG00996263 | ff                                                                                                                    |
| fig 6666666.28482.peg.806 | Contig_119 | 27299 | 28249 | + | Peptidase M48, Ste24p precursor                                                        | FIG00996554 | ff                                                                                                                    |
| fig 6666666.28482.peg.807 | Contig_119 | 28353 | 29810 | + | 6-phosphogluconate dehydrogenase, decarboxylating (EC 1.1.1.44)                        | FIG00000405 | idu(1);Pentose_phosphate_pathway<br>idu(1);D-gluconate_and_ketogluconates_metabolism                                  |

|                           |            |       |       |   |                                                                                                  |             |                                                                                                                                                                                   |
|---------------------------|------------|-------|-------|---|--------------------------------------------------------------------------------------------------|-------------|-----------------------------------------------------------------------------------------------------------------------------------------------------------------------------------|
| fig 6666666.28482.peg.808 | Contig_119 | 29854 | 31290 | + | Inosine-5'-monophosphate dehydrogenase (EC 1.1.1.205)                                            | FIG00020613 | idu(4);Purine_conversions<br>idu(4);Purine_salvage_cluster                                                                                                                        |
| fig 6666666.28482.peg.809 | Contig_119 | 31459 | 32829 | + | Magnesium and cobalt efflux protein CorC                                                         | FIG00042627 | idu(1);CBSS-56780.10.peg.1536                                                                                                                                                     |
| fig 6666666.28482.peg.810 | Contig_119 | 32826 | 33866 | + | hypothetical protein                                                                             |             |                                                                                                                                                                                   |
| fig 6666666.28482.peg.811 | Contig_119 | 34095 | 36302 | + | Malate synthase G (EC 2.3.3.9)                                                                   | FIG00001433 | isu;Glyoxylate_bypass<br>isu;Photorespiration_(oxidative_C2_cycle)<br>isu;Glyoxylate_bypass_cluster                                                                               |
| fig 6666666.28482.peg.812 | Contig_119 | 36419 | 38452 | + | FIG00996932:<br>hypothetical protein                                                             | FIG00820280 | ff                                                                                                                                                                                |
| fig 6666666.28482.peg.813 | Contig_119 | 38585 | 39445 | + | Haloalkane dehalogenase 2 (EC 3.8.1.5)                                                           | FIG01311780 | ff                                                                                                                                                                                |
| fig 6666666.28482.peg.814 | Contig_12  | 56    | 754   | + | Phenylpropionate dioxygenase and related ring-hydroxylating dioxygenases, large terminal subunit | FIG01371907 | ff                                                                                                                                                                                |
| fig 6666666.28482.peg.815 | Contig_12  | 2159  | 813   | - | FIG00821743:<br>hypothetical protein                                                             | FIG00821742 | ff                                                                                                                                                                                |
| fig 6666666.28482.peg.816 | Contig_12  | 2257  | 3723  | + | Aldehyde dehydrogenase (EC 1.2.1.3)                                                              | FIG01292786 | idu(16);Pyruvate_metabolism_II:_acetyl-CoA,_acetogenesis_from_pyruvate<br>idu(16);Glycerolipid_and_Glycerophospholipid_Metabolism_in_Bacteria<br>idu(16);Methylglyoxal_Metabolism |

|                           |           |       |       |   |                                             |             |                               |
|---------------------------|-----------|-------|-------|---|---------------------------------------------|-------------|-------------------------------|
| fig 6666666.28482.peg.817 | Contig_12 | 4251  | 3718  | - | hypothetical protein                        | FIG00638284 | ff                            |
| fig 6666666.28482.peg.818 | Contig_12 | 4681  | 4244  | - | FIG00822385:                                | FIG00822384 | ff                            |
|                           |           |       |       |   | hypothetical protein                        |             |                               |
| fig 6666666.28482.peg.819 | Contig_12 | 5214  | 4678  | - | FIG00821462:                                | FIG00821460 | ff                            |
|                           |           |       |       |   | hypothetical protein                        |             |                               |
| fig 6666666.28482.peg.820 | Contig_12 | 5636  | 5211  | - | FIG00823763:                                | FIG00823762 | ff                            |
|                           |           |       |       |   | hypothetical protein                        |             |                               |
| fig 6666666.28482.peg.821 | Contig_12 | 7293  | 5728  | - | FIG00825609:                                | FIG00825607 | ff                            |
|                           |           |       |       |   | hypothetical protein                        |             |                               |
| fig 6666666.28482.peg.822 | Contig_12 | 8420  | 7293  | - | FIG00821359:                                | FIG00821357 | ff                            |
|                           |           |       |       |   | hypothetical protein                        |             |                               |
| fig 6666666.28482.peg.823 | Contig_12 | 8544  | 9779  | + | putative cytochrome<br>P450 hydroxylase     | FIG00032437 | idu(49);Nitric_oxide_synthase |
| fig 6666666.28482.peg.824 | Contig_12 | 10221 | 9781  | - | alternate gene name:<br>yeel                |             |                               |
| fig 6666666.28482.peg.825 | Contig_12 | 10453 | 10262 | - | FIG00822039:                                | FIG00822036 | ff                            |
|                           |           |       |       |   | hypothetical protein                        |             |                               |
| fig 6666666.28482.peg.826 | Contig_12 | 12862 | 10472 | - | FIG00828044:                                | FIG00828040 | ff                            |
|                           |           |       |       |   | hypothetical protein                        |             |                               |
| fig 6666666.28482.peg.827 | Contig_12 | 12925 | 13758 | + | Transcriptional regulator,<br>GntR family   | FIG00621925 | ff                            |
| fig 6666666.28482.peg.828 | Contig_12 | 13764 | 14483 | + | acetoacetyl-CoA<br>reductase( EC:1.1.1.36 ) | FIG01667335 | ff                            |
| fig 6666666.28482.peg.829 | Contig_12 | 15312 | 14446 | - | FIG00825280:                                | FIG00825278 | ff                            |
|                           |           |       |       |   | hypothetical protein                        |             |                               |

|                           |           |       |       |   |                                                                                      |             |                                                                                                                                                                                                                                                                              |
|---------------------------|-----------|-------|-------|---|--------------------------------------------------------------------------------------|-------------|------------------------------------------------------------------------------------------------------------------------------------------------------------------------------------------------------------------------------------------------------------------------------|
| fig 6666666.28482.peg.830 | Contig_12 | 15383 | 16441 | + | Isovaleryl-CoA dehydrogenase (EC 1.3.99.10); Butyryl-CoA dehydrogenase (EC 1.3.99.2) | FIG01304407 | icw(1);Isoleucine_degradation idu(5);HMG_CoA_Synthesis icw(1);Lysine_fermentation icw(1);Butanol_Biosynthesis icw(1);Acetyl-CoA_fermentation_to_Butyrate idu(5);Leucine_Degradation_and_HMG-CoA_Metabolism icw(1);Valine_degradation icw(1);Anaerobic_respiratory_reductases |
| fig 6666666.28482.peg.831 | Contig_12 | 16438 | 17544 | + | Butyryl-CoA dehydrogenase (EC 1.3.99.2)                                              | FIG00009149 | icw(1);Isoleucine_degradation icw(1);Lysine_fermentation icw(1);Butanol_Biosynthesis icw(1);Acetyl-CoA_fermentation_to_Butyrate icw(1);Valine_degradation icw(1);Anaerobic_respiratory_reductases                                                                            |
| fig 6666666.28482.peg.832 | Contig_12 | 17550 | 18698 | + | Acyl-CoA dehydrogenase (EC 1.3.99.-)                                                 | FIG00820935 | ff                                                                                                                                                                                                                                                                           |
| fig 6666666.28482.peg.833 | Contig_12 | 18695 | 19630 | + | FIG00823450: hypothetical protein                                                    | FIG01416347 | ff                                                                                                                                                                                                                                                                           |
| fig 6666666.28482.peg.834 | Contig_12 | 19627 | 21126 | + | Long-chain-fatty-acid--CoA ligase (EC 6.2.1.3)                                       | FIG00018699 | idu(72);n-Phenylalkanoic_acid_degradation idu(72);Fatty_acid_metabolism_cluster idu(72);Biotin_synthesis_cluster idu(72);Biotin_biosynthesis                                                                                                                                 |
| fig 6666666.28482.peg.835 | Contig_12 | 21362 | 21132 | - | hypothetical protein                                                                 |             |                                                                                                                                                                                                                                                                              |
| fig 6666666.28482.peg.836 | Contig_12 | 21541 | 21939 | + | hypothetical protein                                                                 |             |                                                                                                                                                                                                                                                                              |

|                           |           |       |       |   |                                                                 |             |                                                                                                                                              |
|---------------------------|-----------|-------|-------|---|-----------------------------------------------------------------|-------------|----------------------------------------------------------------------------------------------------------------------------------------------|
| fig 6666666.28482.peg.837 | Contig_12 | 21981 | 23006 | + | Transcriptional regulator,<br>TetR family                       |             |                                                                                                                                              |
| fig 6666666.28482.peg.838 | Contig_12 | 23088 | 24293 | + | BarH                                                            | FIG00668014 | ff                                                                                                                                           |
| fig 6666666.28482.peg.839 | Contig_12 | 24779 | 24285 | - | hypothetical protein                                            |             |                                                                                                                                              |
| fig 6666666.28482.peg.840 | Contig_12 | 24997 | 26952 | + | Serine phosphatase<br>RsbU, regulator of sigma<br>subunit       | FIG00017431 | idu(4);SigmaB_stress_responce_regul<br>ation idu(4);Sigma-<br>B_stress_response_cluster_1                                                    |
| fig 6666666.28482.peg.841 | Contig_12 | 28218 | 26983 | - | FIG00822014:<br>hypothetical protein                            | FIG01547276 | ff                                                                                                                                           |
| fig 6666666.28482.peg.842 | Contig_12 | 29366 | 28215 | - | FIG00832621:<br>hypothetical protein                            | FIG00832619 | ff                                                                                                                                           |
| fig 6666666.28482.peg.843 | Contig_12 | 29521 | 30309 | + | POSSIBLE MEMBRANE<br>PROTEIN                                    |             |                                                                                                                                              |
| fig 6666666.28482.peg.844 | Contig_12 | 30306 | 31007 | + | hypothetical protein                                            |             |                                                                                                                                              |
| fig 6666666.28482.peg.845 | Contig_12 | 31976 | 31017 | - | FIG00821956:<br>hypothetical protein                            | FIG00821954 | ff                                                                                                                                           |
| fig 6666666.28482.peg.846 | Contig_12 | 32410 | 31982 | - | hypothetical protein                                            |             |                                                                                                                                              |
| fig 6666666.28482.peg.847 | Contig_12 | 33563 | 32415 | - | Amidohydrolase 2                                                |             |                                                                                                                                              |
| fig 6666666.28482.peg.848 | Contig_12 | 34600 | 33563 | - | FIG00821228:<br>hypothetical protein                            | FIG01354128 | ff                                                                                                                                           |
| fig 6666666.28482.peg.849 | Contig_12 | 34965 | 34606 | - | Rieske [2Fe-2S] domain,<br>putative                             | FIG00825996 | ff                                                                                                                                           |
| fig 6666666.28482.peg.850 | Contig_12 | 35112 | 36338 | + | putative cytochrome<br>P450 hydroxylase                         | FIG00032437 | idu(49);Nitric_oxide_synthase                                                                                                                |
| fig 6666666.28482.peg.851 | Contig_12 | 36335 | 37492 | + | Alcohol dehydrogenase<br>(EC 1.1.1.1)                           | FIG01007502 | idu(17);Glycerolipid_and_Glyceroph<br>ospholipid_Metabolism_in_Bacteria<br>idu(17);Fermentations:_Mixed_acid<br>idu(17);Butanol_Biosynthesis |
| fig 6666666.28482.peg.852 | Contig_12 | 38367 | 37633 | - | 3-oxoacyl-[acyl-carrier<br>protein] reductase (EC<br>1.1.1.100) | FIG00621114 | idu(38);CBSS-246196.1.peg.364<br>idu(38);CBSS-164757.7.peg.5020<br>idu(38);Fatty_Acid_Biosynthesis_FASI<br>I                                 |

|                           |           |       |       |   |                          |             |                                      |
|---------------------------|-----------|-------|-------|---|--------------------------|-------------|--------------------------------------|
| fig 6666666.28482.peg.853 | Contig_12 | 38804 | 38364 | - | hypothetical protein     |             |                                      |
| fig 6666666.28482.peg.854 | Contig_12 | 39459 | 38911 | - | Protein ycel precursor   | FIG00948541 | ff                                   |
| fig 6666666.28482.peg.855 | Contig_12 | 39788 | 39558 | - | hypothetical protein     |             |                                      |
| fig 6666666.28482.peg.856 | Contig_12 | 40838 | 40011 | - | FIG00827278:             | FIG00827275 | ff                                   |
|                           |           |       |       |   | hypothetical protein     |             |                                      |
| fig 6666666.28482.peg.857 | Contig_12 | 42364 | 41123 | - | putative cytochrome      | FIG00032437 | idu(49);Nitric_oxide_synthase        |
|                           |           |       |       |   | P450 hydroxylase         |             |                                      |
| fig 6666666.28482.peg.858 | Contig_12 | 43383 | 42361 | - | PROBABLE                 | FIG01416034 | ff                                   |
|                           |           |       |       |   | OXIDOREDUCTASE           |             |                                      |
| fig 6666666.28482.peg.859 | Contig_12 | 43524 | 45020 | + | Propionyl-CoA            | FIG01304918 | idu(2);Mycobacterium_virulence_ope   |
|                           |           |       |       |   | carboxylase beta chain   |             | ron_involved_in_fatty_acids_biosynt  |
|                           |           |       |       |   | (EC 6.4.1.3)             |             | hesis idu(2);Serine-glyoxylate_cycle |
| fig 6666666.28482.peg.860 | Contig_12 | 46136 | 45090 | - | N5,N10-                  | FIG01460162 | ff                                   |
|                           |           |       |       |   | methylenetetrahydromet   |             |                                      |
|                           |           |       |       |   | hanopterin reductase-    |             |                                      |
|                           |           |       |       |   | related protein          |             |                                      |
| fig 6666666.28482.peg.861 | Contig_12 | 46507 | 46127 | - | FIG00822683:             | FIG00822682 | ff                                   |
|                           |           |       |       |   | hypothetical protein     |             |                                      |
| fig 6666666.28482.peg.862 | Contig_12 | 47625 | 46507 | - | FIG00823551:             | FIG00823549 | ff                                   |
|                           |           |       |       |   | hypothetical protein     |             |                                      |
| fig 6666666.28482.peg.863 | Contig_12 | 49264 | 47645 | - | Cyclohexanone            | FIG00975774 | ff                                   |
|                           |           |       |       |   | monooxygenase (EC        |             |                                      |
|                           |           |       |       |   | 1.14.13.22)              |             |                                      |
| fig 6666666.28482.peg.864 | Contig_12 | 49706 | 49254 | - | bile acid 7a-dehydratase | FIG01672580 | ff                                   |
| fig 6666666.28482.peg.865 | Contig_12 | 49790 | 50782 | + | Terminal oxygenase KshA  | FIG01318144 | ff                                   |
| fig 6666666.28482.peg.866 | Contig_12 | 50855 | 51472 | + | Isochorismatase (EC      | FIG00009017 | idu(3);Chorismate:_Intermediate_for  |
|                           |           |       |       |   | 3.3.2.1)                 |             | _synthesis_of_Tryptophan,_PAPA_an    |
|                           |           |       |       |   |                          |             | tibiotics,_PABA,_3-                  |
|                           |           |       |       |   |                          |             | hydroxyanthranilate_and_more.        |

|                           |           |       |       |   |                                                              |             |                                                                                                                                                            |
|---------------------------|-----------|-------|-------|---|--------------------------------------------------------------|-------------|------------------------------------------------------------------------------------------------------------------------------------------------------------|
| fig 6666666.28482.peg.867 | Contig_12 | 51469 | 52083 | + | FIG00825422:<br>hypothetical protein                         | FIG00825421 | ff                                                                                                                                                         |
| fig 6666666.28482.peg.868 | Contig_12 | 52092 | 53744 | + | Long-chain-fatty-acid--<br>CoA ligase (EC 6.2.1.3)           | FIG00018699 | idu(72);n-<br>Phenylalkanoic_acid_degradation<br>idu(72);Fatty_acid_metabolism_clust<br>er idu(72);Biotin_synthesis_cluster<br>idu(72);Biotin_biosynthesis |
| fig 6666666.28482.peg.869 | Contig_12 | 54578 | 53748 | - | hypothetical protein                                         | FIG00638284 | ff                                                                                                                                                         |
| fig 6666666.28482.peg.870 | Contig_12 | 54839 | 56047 | + | putative cytochrome<br>P450 hydroxylase                      | FIG00032437 | idu(49);Nitric_oxide_synthase                                                                                                                              |
| fig 6666666.28482.peg.871 | Contig_12 | 56057 | 57280 | + | L-carnitine<br>dehydratase/bile acid-<br>inducible protein F | FIG01318850 | ff                                                                                                                                                         |
| fig 6666666.28482.peg.872 | Contig_12 | 57277 | 59247 | + | 3-ketoacyl-CoA thiolase<br>(acaB-12)                         | FIG00822791 | ff                                                                                                                                                         |
| fig 6666666.28482.peg.873 | Contig_12 | 59314 | 60027 | + | NAD-dependent<br>epimerase/dehydratase                       |             |                                                                                                                                                            |
| fig 6666666.28482.peg.874 | Contig_12 | 60238 | 60528 | + | protein of unknown<br>function DUF485                        | FIG00994736 | ff                                                                                                                                                         |
| fig 6666666.28482.peg.875 | Contig_12 | 60525 | 62159 | + | sodium:solute symporter<br>protein                           | FIG00999154 | ff                                                                                                                                                         |
| fig 6666666.28482.peg.876 | Contig_12 | 64867 | 62192 | - | regulatory protein, LuxR                                     |             |                                                                                                                                                            |
| fig 6666666.28482.peg.877 | Contig_12 | 66418 | 65228 | - | FIG00824968:<br>hypothetical protein                         | FIG00824966 | ff                                                                                                                                                         |

|                           |           |       |       |   |                                                |             |                                                                                                                                                                                                                                                                                                                                            |
|---------------------------|-----------|-------|-------|---|------------------------------------------------|-------------|--------------------------------------------------------------------------------------------------------------------------------------------------------------------------------------------------------------------------------------------------------------------------------------------------------------------------------------------|
| fig 6666666.28482.peg.878 | Contig_12 | 67504 | 66446 | - | Butyryl-CoA dehydrogenase (EC 1.3.99.2)        | FIG00009149 | idu(39);Isoleucine_degradation<br>idu(39);Lysine_fermentation<br>idu(39);Butanol_Biosynthesis<br>idu(39);Acetyl-CoA_fermentation_to_Butyrate<br>idu(39);Valine_degradation<br>idu(39);Anaerobic_respiratory_reductions                                                                                                                     |
| fig 6666666.28482.peg.879 | Contig_12 | 68336 | 67506 | - | PROBABLE ANTIBIOTIC-RESISTANCE PROTEIN         | FIG01366849 | ff                                                                                                                                                                                                                                                                                                                                         |
| fig 6666666.28482.peg.880 | Contig_12 | 69952 | 68333 | - | Long-chain-fatty-acid--CoA ligase (EC 6.2.1.3) | FIG00018699 | idu(72);n-Phenylalkanoic_acid_degradation<br>idu(72);Fatty_acid_metabolism_cluster<br>idu(72);Biotin_synthesis_cluster<br>idu(72);Biotin_biosynthesis                                                                                                                                                                                      |
| fig 6666666.28482.peg.881 | Contig_12 | 71177 | 69975 | - | BarH                                           | FIG00668014 | ff                                                                                                                                                                                                                                                                                                                                         |
| fig 6666666.28482.peg.882 | Contig_12 | 72063 | 71209 | - | Enoyl-CoA hydratase (EC 4.2.1.17)              | FIG00033206 | icw(1);n-Phenylalkanoic_acid_degradation<br>idu(51);Polyhydroxybutyrate_metabolism<br>icw(1);Isoleucine_degradation<br>icw(1);Fatty_acid_metabolism_cluster<br>icw(1);Lysine_fermentation<br>icw(1);Butanol_Biosynthesis<br>icw(1);Acetyl-CoA_fermentation_to_Butyrate<br>icw(1);Valine_degradation<br>idu(51);Butyrate_metabolism_cluster |

|                           |           |       |       |   |                                                                 |             |                                                                                                                                                                                                                                                                                                                                                    |
|---------------------------|-----------|-------|-------|---|-----------------------------------------------------------------|-------------|----------------------------------------------------------------------------------------------------------------------------------------------------------------------------------------------------------------------------------------------------------------------------------------------------------------------------------------------------|
| fig 6666666.28482.peg.883 | Contig_12 | 72541 | 72269 | - | FIG00545001:<br>hypothetical protein                            | FIG00544999 | ff                                                                                                                                                                                                                                                                                                                                                 |
| fig 6666666.28482.peg.884 | Contig_12 | 72684 | 72842 | + | hypothetical protein                                            |             |                                                                                                                                                                                                                                                                                                                                                    |
| fig 6666666.28482.peg.885 | Contig_12 | 72937 | 73176 | + | hypothetical protein                                            |             |                                                                                                                                                                                                                                                                                                                                                    |
| fig 6666666.28482.peg.886 | Contig_12 | 74265 | 73258 | - | dihydrodipicolinate<br>synthetase                               | FIG01465979 | ff                                                                                                                                                                                                                                                                                                                                                 |
| fig 6666666.28482.peg.887 | Contig_12 | 75097 | 74300 | - | 3-oxoacyl-[acyl-carrier<br>protein] reductase (EC<br>1.1.1.100) | FIG00621114 | idu(38);CBSS-246196.1.peg.364<br>idu(38);CBSS-164757.7.peg.5020<br>idu(38);Fatty_Acid_Biosynthesis_FASI<br>I                                                                                                                                                                                                                                       |
| fig 6666666.28482.peg.888 | Contig_12 | 75252 | 76043 | + | Transcriptional regulator,<br>TetR family                       | FIG00554417 | ff                                                                                                                                                                                                                                                                                                                                                 |
| fig 6666666.28482.peg.889 | Contig_12 | 77130 | 76225 | - | Enoyl-CoA hydratase (EC<br>4.2.1.17)                            | FIG00033206 | icw(4);n-<br>Phenylalkanoic_acid_degradation<br>icw(3);Polyhydroxybutyrate_metaboli<br>sm icw(3);Isoleucine_degradation<br>icw(4);Fatty_acid_metabolism_cluste<br>r icw(3);Lysine_fermentation<br>icw(3);Butanol_Biosynthesis<br>icw(3);Acetyl-<br>CoA_fermentation_to_Butyrate<br>icw(3);Valine_degradation<br>icw(3);Butyrate_metabolism_cluster |
| fig 6666666.28482.peg.890 | Contig_12 | 77810 | 77127 | - | FIG00822114:<br>hypothetical protein                            | FIG00822113 | ff                                                                                                                                                                                                                                                                                                                                                 |

|                           |           |       |       |   |                                   |             |                                                                                                                                                                                                                                                                                                                                                    |
|---------------------------|-----------|-------|-------|---|-----------------------------------|-------------|----------------------------------------------------------------------------------------------------------------------------------------------------------------------------------------------------------------------------------------------------------------------------------------------------------------------------------------------------|
| fig 6666666.28482.peg.891 | Contig_12 | 77942 | 78763 | + | Enoyl-CoA hydratase (EC 4.2.1.17) | FIG00033206 | icw(5);n-<br>Phenylalkanoic_acid_degradation<br>icw(3);Polyhydroxybutyrate_metaboli<br>sm icw(3);Isoleucine_degradation<br>icw(5);Fatty_acid_metabolism_cluste<br>r icw(3);Lysine_fermentation<br>icw(3);Butanol_Biosynthesis<br>icw(3);Acetyl-<br>CoA_fermentation_to_Butyrate<br>icw(3);Valine_degradation<br>icw(3);Butyrate_metabolism_cluster |
|---------------------------|-----------|-------|-------|---|-----------------------------------|-------------|----------------------------------------------------------------------------------------------------------------------------------------------------------------------------------------------------------------------------------------------------------------------------------------------------------------------------------------------------|

|                           |           |       |       |   |                                   |             |                                                                                                                                                                                                                                                                                                                                                    |
|---------------------------|-----------|-------|-------|---|-----------------------------------|-------------|----------------------------------------------------------------------------------------------------------------------------------------------------------------------------------------------------------------------------------------------------------------------------------------------------------------------------------------------------|
| fig 6666666.28482.peg.892 | Contig_12 | 78774 | 79586 | + | Enoyl-CoA hydratase (EC 4.2.1.17) | FIG00821959 | icw(6);n-<br>Phenylalkanoic_acid_degradation<br>icw(3);Polyhydroxybutyrate_metaboli<br>sm icw(3);Isoleucine_degradation<br>icw(6);Fatty_acid_metabolism_cluste<br>r icw(3);Lysine_fermentation<br>icw(3);Butanol_Biosynthesis<br>icw(3);Acetyl-<br>CoA_fermentation_to_Butyrate<br>icw(3);Valine_degradation<br>icw(3);Butyrate_metabolism_cluster |
|---------------------------|-----------|-------|-------|---|-----------------------------------|-------------|----------------------------------------------------------------------------------------------------------------------------------------------------------------------------------------------------------------------------------------------------------------------------------------------------------------------------------------------------|

|                           |           |       |       |   |                                                |             |                                                                                                                                                                                                                                                                                                                                          |
|---------------------------|-----------|-------|-------|---|------------------------------------------------|-------------|------------------------------------------------------------------------------------------------------------------------------------------------------------------------------------------------------------------------------------------------------------------------------------------------------------------------------------------|
| fig 6666666.28482.peg.893 | Contig_12 | 79577 | 80377 | + | Enoyl-CoA hydratase (EC 4.2.1.17)              | FIG00033206 | icw(6);n-Phenylalkanoic_acid_degradation<br>icw(3);Polyhydroxybutyrate_metabolism<br>icw(3);Isoleucine_degradation<br>icw(6);Fatty_acid_metabolism_cluster<br>icw(3);Lysine_fermentation<br>icw(3);Butanol_Biosynthesis<br>icw(3);Acetyl-CoA_fermentation_to_Butyrate<br>icw(3);Valine_degradation<br>icw(3);Butyrate_metabolism_cluster |
| fig 6666666.28482.peg.894 | Contig_12 | 80374 | 81837 | + | Long-chain-fatty-acid--CoA ligase (EC 6.2.1.3) | FIG00018699 | icw(2);n-Phenylalkanoic_acid_degradation<br>icw(2);Fatty_acid_metabolism_cluster<br>icw(2);Biotin_synthesis_cluster<br>icw(2);Biotin_biosynthesis                                                                                                                                                                                        |
| fig 6666666.28482.peg.895 | Contig_12 | 81902 | 83368 | + | Long-chain-fatty-acid--CoA ligase (EC 6.2.1.3) | FIG00018699 | icw(2);n-Phenylalkanoic_acid_degradation<br>icw(2);Fatty_acid_metabolism_cluster<br>icw(2);Biotin_synthesis_cluster<br>icw(2);Biotin_biosynthesis                                                                                                                                                                                        |

|                           |           |       |       |   |                                                                     |             |                                                                                                                                                                                                                          |
|---------------------------|-----------|-------|-------|---|---------------------------------------------------------------------|-------------|--------------------------------------------------------------------------------------------------------------------------------------------------------------------------------------------------------------------------|
| fig 6666666.28482.peg.896 | Contig_12 | 83361 | 84893 | + | Long-chain-fatty-acid--<br>CoA ligase (EC 6.2.1.3)                  | FIG00018699 | icw(2);n-<br>Phenylalkanoic_acid_degradation<br>icw(2);Fatty_acid_metabolism_cluste<br>r icw(2);Biotin_synthesis_cluster<br>icw(2);Biotin_biosynthesis                                                                   |
| fig 6666666.28482.peg.897 | Contig_12 | 85210 | 84890 | - | hypothetical protein                                                |             |                                                                                                                                                                                                                          |
| fig 6666666.28482.peg.898 | Contig_12 | 86024 | 85332 | - | Predicted regulator PutR<br>for proline utilization,<br>GntR family | FIG00004161 | idu(2);Proline,_4-<br>hydroxyproline_uptake_and_utilizati<br>on                                                                                                                                                          |
| fig 6666666.28482.peg.899 | Contig_12 | 87222 | 86029 | - | Butyryl-CoA<br>dehydrogenase (EC<br>1.3.99.2)                       | FIG00009149 | icw(1);Isoleucine_degradation<br>icw(1);Lysine_fermentation<br>icw(1);Butanol_Biosynthesis<br>icw(1);Acetyl-<br>CoA_fermentation_to_Butyrate<br>icw(1);Valine_degradation<br>icw(1);Anaerobic_respiratory_reduct<br>ases |
| fig 6666666.28482.peg.900 | Contig_12 | 88421 | 87219 | - | FIG00827952:<br>hypothetical protein                                | FIG00827950 | ff                                                                                                                                                                                                                       |
| fig 6666666.28482.peg.901 | Contig_12 | 89635 | 88418 | - | beta-ketothiolase(<br>EC:2.3.1.9 )                                  |             |                                                                                                                                                                                                                          |
| fig 6666666.28482.peg.902 | Contig_12 | 90390 | 89650 | - | 3-oxoacyl-[acyl-carrier<br>protein] reductase (EC<br>1.1.1.100)     | FIG00621114 | idu(38);CBSS-246196.1.peg.364<br>idu(38);CBSS-164757.7.peg.5020<br>idu(38);Fatty_Acid_Biosynthesis_FASI<br>I                                                                                                             |

|                           |           |        |        |   |                                                              |             |                                                                                                                                                                                                                  |
|---------------------------|-----------|--------|--------|---|--------------------------------------------------------------|-------------|------------------------------------------------------------------------------------------------------------------------------------------------------------------------------------------------------------------|
| fig 6666666.28482.peg.903 | Contig_12 | 90525  | 91697  | + | Butyryl-CoA dehydrogenase (EC 1.3.99.2)                      | FIG00009149 | icw(1);Isoleucine_degradation<br>icw(1);Lysine_fermentation<br>icw(1);Butanol_Biosynthesis<br>icw(1);Acetyl-CoA_fermentation_to_Butyrate<br>icw(1);Valine_degradation<br>icw(1);Anaerobic_respiratory_reductases |
| fig 6666666.28482.peg.904 | Contig_12 | 91694  | 92515  | + | FIG00825648: hypothetical protein                            | FIG00825647 | ff                                                                                                                                                                                                               |
| fig 6666666.28482.peg.905 | Contig_12 | 92546  | 92989  | + | FIG00825123: hypothetical protein                            | FIG00825122 | ff                                                                                                                                                                                                               |
| fig 6666666.28482.peg.906 | Contig_12 | 94062  | 92986  | - | FIG00828143: hypothetical protein                            | FIG00828140 | ff                                                                                                                                                                                                               |
| fig 6666666.28482.peg.907 | Contig_12 | 95879  | 94131  | - | ABC transporter ATP-binding protein                          | FIG01956052 | ff                                                                                                                                                                                                               |
| fig 6666666.28482.peg.908 | Contig_12 | 98446  | 95876  | - | ABC transporter ATP-binding protein                          | FIG01956052 | ff                                                                                                                                                                                                               |
| fig 6666666.28482.peg.909 | Contig_12 | 99939  | 98707  | - | POSSIBLE LINOLEOYL-CoA DESATURASE (DELTA(6)-DESATURASE)      | FIG00539310 | ff                                                                                                                                                                                                               |
| fig 6666666.28482.peg.910 | Contig_12 | 101075 | 99948  | - | Flavodoxin reductases (ferredoxin-NADPH reductases) family 1 | FIG01954108 | idu(3);Anaerobic_respiratory_reductases                                                                                                                                                                          |
| fig 6666666.28482.peg.911 | Contig_12 | 101350 | 102261 | + | hypothetical protein                                         | FIG00638284 | ff                                                                                                                                                                                                               |
| fig 6666666.28482.peg.912 | Contig_12 | 102561 | 102262 | - | FIG00823680: hypothetical protein                            | FIG00823679 | ff                                                                                                                                                                                                               |
| fig 6666666.28482.peg.913 | Contig_12 | 103090 | 102662 | - | FIG00672531: hypothetical protein                            | FIG01121505 | ff                                                                                                                                                                                                               |
| fig 6666666.28482.rna.9   | Contig_12 | 103383 | 103300 | - | tRNA-Leu-TAG                                                 |             |                                                                                                                                                                                                                  |
| fig 6666666.28482.peg.914 | Contig_12 | 103455 | 103835 | + | Lipoprotein LprD                                             | FIG00861686 | ff                                                                                                                                                                                                               |

|                           |           |        |        |   |                                                                                       |             |                                                                                                                                                    |
|---------------------------|-----------|--------|--------|---|---------------------------------------------------------------------------------------|-------------|----------------------------------------------------------------------------------------------------------------------------------------------------|
| fig 6666666.28482.peg.915 | Contig_12 | 103832 | 104173 | + | CONSERVED MEMBRANE                                                                    | FIG00818075 | ff                                                                                                                                                 |
|                           |           |        |        |   | PROTEIN                                                                               |             |                                                                                                                                                    |
| fig 6666666.28482.peg.916 | Contig_12 | 104931 | 104326 | - | Nucleoside 5-<br>triphosphatase RdgB<br>(dHATP, dITP, XTP-<br>specific) (EC 3.6.1.15) | FIG00000584 | isu;Heat_shock_dnaK_gene_cluster_<br>extended<br>isu;Housecleaning_nucleoside_triphos<br>phate_pyrophosphatases                                    |
| fig 6666666.28482.peg.917 | Contig_12 | 105720 | 104941 | - | Ribonuclease PH (EC<br>2.7.7.56)                                                      | FIG00135600 | isu;tRNA_processing<br>icw(1);Heat_shock_dnaK_gene_clust<br>er_extended                                                                            |
| fig 6666666.28482.peg.918 | Contig_12 | 106530 | 105748 | - | Metal-dependent<br>hydrolases of the beta-<br>lactamase superfamily III               | FIG00113090 | isu;Beta-lactamase                                                                                                                                 |
| fig 6666666.28482.peg.919 | Contig_12 | 107417 | 106602 | - | Glutamate racemase (EC<br>5.1.1.3)                                                    | FIG00000397 | isu;Glutamine,_Glutamate,_Aspartat<br>e_and_Asparagine_Biosynthesis<br>isu;Poly-gamma-<br>glutamate_biosynthesis<br>isu;Peptidoglycan_Biosynthesis |
| fig 6666666.28482.peg.920 | Contig_12 | 108076 | 107414 | - | Rhomboid membrane<br>family protein                                                   | FIG00824237 | ff                                                                                                                                                 |
| fig 6666666.28482.peg.921 | Contig_12 | 109289 | 108249 | - | possible hydrolase                                                                    | FIG01037871 | ff                                                                                                                                                 |
| fig 6666666.28482.peg.922 | Contig_12 | 109890 | 109306 | - | Transcriptional<br>regulatory protein                                                 | FIG00447785 | ff                                                                                                                                                 |
| fig 6666666.28482.peg.923 | Contig_12 | 110161 | 109916 | - | ATP-dependent Clp<br>protease adaptor protein<br>ClpS                                 | FIG00018741 | isu;Proteolysis_in_bacteria,_ATP-<br>dependent isu;ClpAS_cluster                                                                                   |
| fig 6666666.28482.peg.924 | Contig_12 | 110277 | 111575 | + | Nicotinate<br>phosphoribosyltransferas<br>e (EC 2.4.2.11)                             | FIG00000387 | isu;NAD_and_NADP_cofactor_biosyn<br>thesis_global isu;Redox-<br>dependent_regulation_of_nucleus_pr<br>ocesses                                      |
| fig 6666666.28482.peg.925 | Contig_12 | 111587 | 113590 | + | DinG family ATP-<br>dependent helicase YoaA                                           | FIG00000680 | isu;DNA_repair,_bacterial_DinG_and<br>_relatives                                                                                                   |

|                           |           |        |        |   |                                                                        |             |                                                                               |
|---------------------------|-----------|--------|--------|---|------------------------------------------------------------------------|-------------|-------------------------------------------------------------------------------|
| fig 6666666.28482.peg.926 | Contig_12 | 116201 | 113574 | - | Glycogen phosphorylase (EC 2.4.1.1)                                    | FIG00000476 | icw(1);Glycogen_metabolism<br>idu(1);Maltose_and_Maltodextrin_Ut<br>ilization |
| fig 6666666.28482.peg.927 | Contig_12 | 116424 | 118517 | + | Putative glucanase glgE (EC 3.2.1.-)                                   | FIG00143078 | isu;Trehalose_Biosynthesis                                                    |
| fig 6666666.28482.peg.928 | Contig_12 | 118524 | 120719 | + | 1,4-alpha-glucan (glycogen) branching enzyme, GH-13-type (EC 2.4.1.18) | FIG00024930 | icw(1);Trehalose_Biosynthesis<br>isu;Glycogen_metabolism                      |
| fig 6666666.28482.peg.929 | Contig_12 | 121649 | 120747 | - | COG3118: Thioredoxin domain-containing protein EC-YbbN                 | FIG00000875 | ff                                                                            |

|                           |           |                 |                                                                                   |             |                                                                                                                                                                                                                                                                                                                                                                                                                                                                                                                                                                                                                                |
|---------------------------|-----------|-----------------|-----------------------------------------------------------------------------------|-------------|--------------------------------------------------------------------------------------------------------------------------------------------------------------------------------------------------------------------------------------------------------------------------------------------------------------------------------------------------------------------------------------------------------------------------------------------------------------------------------------------------------------------------------------------------------------------------------------------------------------------------------|
| fig 6666666.28482.peg.930 | Contig_12 | 122987 121785 - | 3-ketoacyl-CoA thiolase (EC 2.3.1.16) @ Acetyl-CoA acetyltransferase (EC 2.3.1.9) | FIG00000004 | idu(11);CBSS-246196.1.peg.364<br>idu(9);Serine-glyoxylate_cycle<br>idu(11);Serine-glyoxylate_cycle<br>idu(11);n-Phenylalkanoic_acid_degradation<br>idu(9);Ethylmalonyl-CoA_pathway_of_C2_assimilation,_GJO<br>idu(9);Polyhydroxybutyrate_metabolism<br>idu(11);Polyhydroxybutyrate_metabolism<br>idu(11);Isoleucine_degradation<br>idu(11);Fatty_acid_metabolism_cluster<br>idu(11);Biotin_synthesis_cluster<br>idu(11);Biotin_biosynthesis<br>idu(9);Lysine_fermentation<br>idu(9);Isoprenoid_Biosynthesis<br>idu(9);Butanol_Biosynthesis<br>idu(9);Acetyl-CoA_fermentation_to_Butyrate<br>idu(9);Butyrate_metabolism_cluster |
| fig 6666666.28482.peg.931 | Contig_12 | 123096 123503 + | Methylmalonyl-CoA epimerase (EC 5.1.99.1); Ethylmalonyl-CoA epimerase             | FIG00019870 | icw(1);Ethylmalonyl-CoA_pathway_of_C2_assimilation,_GJO                                                                                                                                                                                                                                                                                                                                                                                                                                                                                                                                                                        |
| fig 6666666.28482.peg.932 | Contig_12 | 123821 123591 - | FIG00997641: hypothetical protein                                                 | FIG00997640 | ff                                                                                                                                                                                                                                                                                                                                                                                                                                                                                                                                                                                                                             |
| fig 6666666.28482.peg.933 | Contig_12 | 124555 123884 - | FIG00996186: hypothetical protein                                                 | FIG00945501 | ff                                                                                                                                                                                                                                                                                                                                                                                                                                                                                                                                                                                                                             |

|                           |           |        |        |   |                                                                  |             |                                    |
|---------------------------|-----------|--------|--------|---|------------------------------------------------------------------|-------------|------------------------------------|
| fig 6666666.28482.peg.934 | Contig_12 | 124601 | 126214 | + | Adenylate cyclase (EC 4.6.1.1)                                   | FIG00001294 | idu(25);cAMP_signaling_in_bacteria |
| fig 6666666.28482.peg.935 | Contig_12 | 126433 | 127764 | + | Oxalate/formate antiporter                                       | FIG01351990 | ff                                 |
| fig 6666666.28482.peg.936 | Contig_12 | 129032 | 127743 | - | Major facilitator superfamily precursor                          | FIG01057154 | ff                                 |
| fig 6666666.28482.peg.937 | Contig_12 | 129189 | 130076 | + | transcriptional regulator, LysR family protein                   |             |                                    |
| fig 6666666.28482.peg.938 | Contig_12 | 130632 | 130033 | - | Transcriptional regulator, TetR family                           | FIG00554417 | ff                                 |
| fig 6666666.28482.peg.939 | Contig_12 | 130879 | 131433 | + | pyridoxamine 5'-phosphate oxidase-related FMN-binding            | FIG01780640 | ff                                 |
| fig 6666666.28482.peg.940 | Contig_12 | 131446 | 132750 | + | hypothetical protein                                             |             |                                    |
| fig 6666666.28482.peg.941 | Contig_12 | 132819 | 134306 | + | Methylated-DNA--protein-cysteine methyltransferase (EC 2.1.1.63) | FIG00000328 | icw(1);DNA_repair,_bacterial       |
| fig 6666666.28482.peg.942 | Contig_12 | 134303 | 134794 | + | Methylated-DNA--protein-cysteine methyltransferase (EC 2.1.1.63) | FIG00000328 | icw(1);DNA_repair,_bacterial       |
| fig 6666666.28482.rna.10  | Contig_12 | 134955 | 134840 | - | 5S RNA                                                           |             |                                    |
| fig 6666666.28482.rna.11  | Contig_12 | 138134 | 134998 | - | Large Subunit Ribosomal RNA; lsuRNA; LSU rRNA                    |             |                                    |
| fig 6666666.28482.rna.12  | Contig_12 | 139942 | 138419 | - | Small Subunit Ribosomal RNA; ssuRNA; SSU rRNA                    |             |                                    |

|                           |           |        |        |   |                                                                              |             |                                                                                                                                                                                  |
|---------------------------|-----------|--------|--------|---|------------------------------------------------------------------------------|-------------|----------------------------------------------------------------------------------------------------------------------------------------------------------------------------------|
| fig 6666666.28482.peg.943 | Contig_12 | 141572 | 140319 | - | UDP-N-acetylglucosamine 1-carboxyvinyltransferase (EC 2.5.1.7)               | FIG00034392 | isu;UDP-N-acetylmutamurate_from_Fructose-6-phosphate_Biosynthesis                                                                                                                |
| fig 6666666.28482.peg.944 | Contig_12 | 141645 | 142226 | + | Cob(I)alamin adenosyltransferase PduO (EC 2.5.1.17)                          | FIG00001045 | isu;Peptidoglycan_Biosynthesis<br>isu;Glycerol_fermentation_to_1,3-propanediol<br>isu;Coenzyme_B12_biosynthesis<br>isu;G3E_family_of_P-loop_GTPases_(metallocenter_biosynthesis) |
| fig 6666666.28482.peg.945 | Contig_12 | 142735 | 142304 | - | Possible membrane protein                                                    | FIG01121868 | ff                                                                                                                                                                               |
| fig 6666666.28482.peg.946 | Contig_12 | 143119 | 142754 | - | ATP synthase epsilon chain (EC 3.6.3.14)                                     | FIG00000249 | icw(3);F0F1-type_ATP_synthase                                                                                                                                                    |
| fig 6666666.28482.peg.947 | Contig_12 | 144612 | 143146 | - | ATP synthase beta chain (EC 3.6.3.14)                                        | FIG00040241 | icw(2);F0F1-type_ATP_synthase                                                                                                                                                    |
| fig 6666666.28482.peg.948 | Contig_12 | 145549 | 144632 | - | ATP synthase gamma chain (EC 3.6.3.14)                                       | FIG00023994 | icw(4);F0F1-type_ATP_synthase                                                                                                                                                    |
| fig 6666666.28482.peg.949 | Contig_12 | 147229 | 145556 | - | ATP synthase alpha chain (EC 3.6.3.14)                                       | FIG00000082 | icw(5);F0F1-type_ATP_synthase                                                                                                                                                    |
| fig 6666666.28482.peg.950 | Contig_12 | 148623 | 147283 | - | ATP synthase B' chain (EC 3.6.3.14) / ATP synthase delta chain (EC 3.6.3.14) | FIG01305175 | icw(1);F0F1-type_ATP_synthase<br>icw(4);F0F1-type_ATP_synthase                                                                                                                   |
| fig 6666666.28482.peg.951 | Contig_12 | 149129 | 148629 | - | ATP synthase B chain (EC 3.6.3.14)                                           | FIG00000186 | icw(2);F0F1-type_ATP_synthase                                                                                                                                                    |
| fig 6666666.28482.peg.952 | Contig_12 | 149402 | 149157 | - | ATP synthase C chain (EC 3.6.3.14)                                           | FIG00017607 | isu;F0F1-type_ATP_synthase                                                                                                                                                       |
| fig 6666666.28482.peg.953 | Contig_12 | 150204 | 149449 | - | ATP synthase A chain (EC 3.6.3.14)                                           | FIG00000138 | icw(5);F0F1-type_ATP_synthase                                                                                                                                                    |
| fig 6666666.28482.peg.954 | Contig_12 | 150664 | 150197 | - | hypothetical protein                                                         |             |                                                                                                                                                                                  |

|                           |           |        |        |   |                                                                                                 |             |                                                                                                                                                       |
|---------------------------|-----------|--------|--------|---|-------------------------------------------------------------------------------------------------|-------------|-------------------------------------------------------------------------------------------------------------------------------------------------------|
| fig 6666666.28482.peg.955 | Contig_12 | 152094 | 150913 | - | Undecaprenyl-phosphate N-acetylglucosaminyl 1-phosphate transferase (EC 2.7.8.-)                | FIG01955782 | isu;Methicillin_resistance_in_Staphylococci<br>isu;Teichoic_and_lipoteichoic_acids_biosynthesis                                                       |
| fig 6666666.28482.peg.956 | Contig_12 | 152794 | 152141 | - | TsaC protein (YrdC domain) required for threonylcarbamoyladenosine t(6)A37 modification in tRNA |             |                                                                                                                                                       |
| fig 6666666.28482.peg.957 | Contig_12 | 153669 | 152791 | - | Methylase of polypeptide chain release factors                                                  | FIG00003217 | ff                                                                                                                                                    |
| fig 6666666.28482.peg.958 | Contig_12 | 154756 | 153683 | - | Peptide chain release factor 1                                                                  | FIG00000188 | isu;Translation_termination_factors_bacterial                                                                                                         |
| fig 6666666.28482.peg.959 | Contig_12 | 155077 | 154835 | - | LSU ribosomal protein L31p                                                                      | FIG00000092 | isu;Ribosome_LSU_bacterial                                                                                                                            |
| fig 6666666.28482.peg.960 | Contig_12 | 155060 | 155245 | + | hypothetical protein                                                                            |             |                                                                                                                                                       |
| fig 6666666.28482.peg.961 | Contig_12 | 156801 | 155221 | - | Long-chain-fatty-acid--CoA ligase (EC 6.2.1.3)                                                  | FIG00018699 | idu(72);n-Phenylalkanoic_acid_degradation<br>idu(72);Fatty_acid_metabolism_cluster<br>idu(72);Biotin_synthesis_cluster<br>idu(72);Biotin_biosynthesis |
| fig 6666666.28482.peg.962 | Contig_12 | 158589 | 156814 | - | Transcription termination factor Rho                                                            | FIG00000392 | isu;Transcription_factors_bacterial                                                                                                                   |
| fig 6666666.28482.peg.963 | Contig_12 | 159860 | 158913 | - | Homoserine kinase (EC 2.7.1.39)                                                                 | FIG00000582 | isu;CBSS-269482.1.peg.1294<br>icw(2);Threonine_and_Homoserine_Biosynthesis                                                                            |
| fig 6666666.28482.peg.964 | Contig_12 | 160904 | 159864 | - | Threonine synthase (EC 4.2.3.1)                                                                 | FIG00000134 | icw(1);Threonine_and_Homoserine_Biosynthesis                                                                                                          |

|                           |           |        |        |   |                                                           |             |                                                                                                                                |
|---------------------------|-----------|--------|--------|---|-----------------------------------------------------------|-------------|--------------------------------------------------------------------------------------------------------------------------------|
| fig 6666666.28482.peg.965 | Contig_12 | 162268 | 160943 | - | Homoserine dehydrogenase (EC 1.1.1.3)                     | FIG00000434 | isu;Threonine_and_Homoserine_Biosynthesis                                                                                      |
| fig 6666666.28482.peg.966 | Contig_12 | 163690 | 162272 | - | Diaminopimelate decarboxylase (EC 4.1.1.20)               | FIG00138250 | idu(2);CBSS-323850.3.peg.3269<br>idu(2);Lysine_Biosynthesis_DAP_Pathway,_GJO_scratch<br>idu(2);Lysine_Biosynthesis_DAP_Pathway |
| fig 6666666.28482.peg.967 | Contig_12 | 165339 | 163687 | - | Arginyl-tRNA synthetase (EC 6.1.1.19)                     | FIG00000088 | isu;tRNA_aminoacylation,_Arg                                                                                                   |
| fig 6666666.28482.peg.968 | Contig_12 | 166575 | 165433 | - | low-specificity D-threonine aldolase                      | FIG00140689 | isu;Serine-glyoxylate_cycle<br>isu;Threonine_degradation                                                                       |
| fig 6666666.28482.peg.969 | Contig_12 | 167018 | 166572 | - | tautomerase, putative                                     |             |                                                                                                                                |
| fig 6666666.28482.peg.970 | Contig_12 | 167126 | 168094 | + | transcriptional regulator, AraC family                    |             |                                                                                                                                |
| fig 6666666.28482.rna.13  | Contig_12 | 168169 | 168241 | + | tRNA-Arg-CCG                                              |             | isu;tRNAs                                                                                                                      |
| fig 6666666.28482.peg.971 | Contig_12 | 168490 | 169260 | + | hypothetical protein                                      | FIG00638284 | ff                                                                                                                             |
| fig 6666666.28482.peg.972 | Contig_12 | 169650 | 169405 | - | site-specific recombinase, phage integrase family protein |             |                                                                                                                                |
| fig 6666666.28482.peg.973 | Contig_12 | 170178 | 169873 | - | hypothetical protein                                      |             |                                                                                                                                |
| fig 6666666.28482.peg.974 | Contig_12 | 170409 | 171065 | + | cutinase Cut1                                             | FIG01392700 | ff                                                                                                                             |
| fig 6666666.28482.peg.975 | Contig_12 | 171304 | 171495 | + | hypothetical protein                                      |             |                                                                                                                                |
| fig 6666666.28482.peg.976 | Contig_12 | 171944 | 171528 | - | FIG00825572:                                              | FIG00825568 | ff                                                                                                                             |
| fig 6666666.28482.peg.977 | Contig_12 | 171943 | 172065 | + | hypothetical protein                                      |             |                                                                                                                                |
| fig 6666666.28482.peg.978 | Contig_12 | 172763 | 172062 | - | hypothetical protein                                      |             |                                                                                                                                |
| fig 6666666.28482.peg.979 | Contig_12 | 173019 | 172822 | - | hypothetical protein                                      |             |                                                                                                                                |
| fig 6666666.28482.peg.980 | Contig_12 | 173180 | 173034 | - | hypothetical protein                                      |             |                                                                                                                                |
| fig 6666666.28482.peg.981 | Contig_12 | 173376 | 173825 | + | Transcriptional regulator, MarR family                    |             |                                                                                                                                |

|                           |           |        |        |   |                                                                 |             |                                                                                                                                                                                                                                                                                           |
|---------------------------|-----------|--------|--------|---|-----------------------------------------------------------------|-------------|-------------------------------------------------------------------------------------------------------------------------------------------------------------------------------------------------------------------------------------------------------------------------------------------|
| fig 6666666.28482.peg.982 | Contig_12 | 173901 | 174278 | + | putative integral<br>membrane protein                           |             |                                                                                                                                                                                                                                                                                           |
| fig 6666666.28482.peg.983 | Contig_12 | 174820 | 174275 | - | Putative<br>carboxymuconolactone<br>decarboxylase               |             |                                                                                                                                                                                                                                                                                           |
| fig 6666666.28482.peg.984 | Contig_12 | 174904 | 175692 | + | 3-oxoacyl-[acyl-carrier<br>protein] reductase (EC<br>1.1.1.100) | FIG00621114 | icw(1);CBSS-246196.1.peg.364<br>icw(1);CBSS-164757.7.peg.5020<br>icw(1);Fatty_Acid_Biosynthesis_FASII                                                                                                                                                                                     |
| fig 6666666.28482.peg.985 | Contig_12 | 176751 | 175939 | - | 3-oxoacyl-[acyl-carrier<br>protein] reductase (EC<br>1.1.1.100) | FIG00621114 | icw(1);CBSS-246196.1.peg.364<br>icw(1);CBSS-164757.7.peg.5020<br>icw(1);Fatty_Acid_Biosynthesis_FASII                                                                                                                                                                                     |
| fig 6666666.28482.peg.986 | Contig_12 | 176836 | 177825 | + | dTDP-glucose 4,6-<br>dehydratase (EC 4.2.1.46)                  | FIG00030688 | idu(4);dTDP-rhamnose_synthesis<br>idu(4);Rhamnose_containing_glycans                                                                                                                                                                                                                      |
| fig 6666666.28482.peg.987 | Contig_12 | 177918 | 178376 | + | Transcriptional regulator,<br>TetR family                       |             |                                                                                                                                                                                                                                                                                           |
| fig 6666666.28482.peg.988 | Contig_12 | 178894 | 178364 | - | hypothetical protein                                            | FIG00638284 | ff                                                                                                                                                                                                                                                                                        |
| fig 6666666.28482.peg.989 | Contig_12 | 179476 | 178925 | - | ADP-ribose<br>pyrophosphatase (EC<br>3.6.1.13)                  | FIG00000367 | idu(1);NAD_and_NADP_cofactor_bios<br>ynthesis_global idu(1);CBSS-<br>216591.1.peg.168<br>idu(1);Nudix_proteins_(nucleoside_tr<br>iphosphate_hydrolases)<br>idu(1);Ribosome_post-<br>transcriptional_modification_and_chr<br>omosomal_segregation_cluster<br>idu(1);CBSS-342610.3.peg.1794 |
| fig 6666666.28482.peg.990 | Contig_12 | 179499 | 179870 | + | FIG00830738:<br>hypothetical protein                            | FIG00830734 | ff                                                                                                                                                                                                                                                                                        |
| fig 6666666.28482.peg.991 | Contig_12 | 179969 | 179844 | - | hypothetical protein                                            |             |                                                                                                                                                                                                                                                                                           |

|                            |           |        |        |   |                                                                                           |             |                                                                                                                                                                                                                    |
|----------------------------|-----------|--------|--------|---|-------------------------------------------------------------------------------------------|-------------|--------------------------------------------------------------------------------------------------------------------------------------------------------------------------------------------------------------------|
| fig 6666666.28482.peg.992  | Contig_12 | 179958 | 181673 | + | Potassium channel protein                                                                 | FIG00006661 | idu(2);Potassium_homeostasis                                                                                                                                                                                       |
| fig 6666666.28482.peg.993  | Contig_12 | 182560 | 181670 | - | FIG00824659: hypothetical protein                                                         | FIG00824655 | ff                                                                                                                                                                                                                 |
| fig 6666666.28482.peg.994  | Contig_12 | 182579 | 183001 | + | glyoxalase/bleomycin resistance protein/dioxygenase                                       | FIG00821958 | ff                                                                                                                                                                                                                 |
| fig 6666666.28482.peg.995  | Contig_12 | 183107 | 183496 | + | FIG00820839: hypothetical protein                                                         | FIG00820835 | ff                                                                                                                                                                                                                 |
| fig 6666666.28482.peg.996  | Contig_12 | 183978 | 183493 | - | Predicted transcriptional regulator of sulfate adenylyltransferase, Rrf2 family           | FIG00011844 | isu;Rrf2_family_transcriptional_regulators                                                                                                                                                                         |
| fig 6666666.28482.peg.997  | Contig_12 | 185852 | 184011 | - | Sulfate adenylyltransferase subunit 1 (EC 2.7.7.4) / Adenylylsulfate kinase (EC 2.7.1.25) | FIG00133521 | idu(1);Cysteine_Biosynthesis<br>icw(1);Cysteine_Biosynthesis idu(1);O-Methyl_Phosphoramidate_Capsule_Modification_in_Campylobacter<br>idu(1);Inorganic_Sulfur_Assimilation<br>icw(1);Inorganic_Sulfur_Assimilation |
| fig 6666666.28482.peg.998  | Contig_12 | 186781 | 185852 | - | Sulfate adenylyltransferase subunit 2 (EC 2.7.7.4)                                        | FIG00000728 | icw(1);Cysteine_Biosynthesis<br>icw(1);Inorganic_Sulfur_Assimilation                                                                                                                                               |
| fig 6666666.28482.peg.999  | Contig_12 | 186949 | 187386 | + | FIG00820608: hypothetical protein                                                         | FIG00820606 | ff                                                                                                                                                                                                                 |
| fig 6666666.28482.peg.1000 | Contig_12 | 187947 | 187456 | - | Carbonic anhydrase (EC 4.2.1.1)                                                           | FIG00023019 | idu(1);Cyanate_hydrolysis                                                                                                                                                                                          |

|                            |            |        |        |   |                                                                                              |             |                                                    |
|----------------------------|------------|--------|--------|---|----------------------------------------------------------------------------------------------|-------------|----------------------------------------------------|
| fig 6666666.28482.peg.1001 | Contig_12  | 188084 | 189061 | + | Oligopeptide transport system permease protein OppB (TC 3.A.1.5.1)                           | FIG00945384 | icw(2);ABC_transporter_oligopeptide_(TC_3.A.1.5.1) |
| fig 6666666.28482.peg.1002 | Contig_12  | 189058 | 189972 | + | Oligopeptide transport system permease protein OppC (TC 3.A.1.5.1)                           | FIG00455853 | isu;ABC_transporter_oligopeptide_(TC_3.A.1.5.1)    |
| fig 6666666.28482.peg.1003 | Contig_12  | 189969 | 191810 | + | Oligopeptide transport system permease protein OppB (TC 3.A.1.5.1)                           | FIG00945384 | icw(2);ABC_transporter_oligopeptide_(TC_3.A.1.5.1) |
| fig 6666666.28482.peg.1004 | Contig_12  | 191896 | 193539 | + | "Oligopeptide ABC transporter, periplasmic oligopeptide-binding protein OppA (TC 3.A.1.5.1)" | FIG01307132 | ff                                                 |
| fig 6666666.28482.peg.1005 | Contig_12  | 194773 | 193526 | - | FIG00824587: hypothetical protein                                                            | FIG00824586 | ff                                                 |
| fig 6666666.28482.peg.1006 | Contig_12  | 197439 | 194818 | - | DNA double-strand break repair Rad50 ATPase                                                  | FIG00944792 | isu;Rad50-Mre11_DNA_repair_cluster                 |
| fig 6666666.28482.peg.1007 | Contig_12  | 198572 | 197436 | - | DNA double-strand break repair protein Mre11                                                 | FIG00614964 | icw(1);Rad50-Mre11_DNA_repair_cluster              |
| fig 6666666.28482.peg.1008 | Contig_120 | 38     | 391    | + | Possible membrane protein                                                                    | FIG01121868 | ff                                                 |
| fig 6666666.28482.peg.1009 | Contig_120 | 399    | 1295   | + | FIG00821563: hypothetical protein                                                            | FIG00821562 | ff                                                 |
| fig 6666666.28482.peg.1010 | Contig_120 | 1407   | 1997   | + | Immunogenic protein Mpt70                                                                    | FIG01320678 | ff                                                 |

|                            |            |       |       |   |                                                         |             |                                                                                                                                                                                                                                                                       |
|----------------------------|------------|-------|-------|---|---------------------------------------------------------|-------------|-----------------------------------------------------------------------------------------------------------------------------------------------------------------------------------------------------------------------------------------------------------------------|
| fig 6666666.28482.peg.1011 | Contig_120 | 2052  | 2543  | + | FIG00824620:<br>hypothetical protein                    | FIG00824619 | ff                                                                                                                                                                                                                                                                    |
| fig 6666666.28482.peg.1012 | Contig_120 | 2540  | 3637  | + | FIG00822822:<br>hypothetical protein                    | FIG00822820 | ff                                                                                                                                                                                                                                                                    |
| fig 6666666.28482.peg.1013 | Contig_120 | 3634  | 4755  | + | hypothetical protein                                    |             |                                                                                                                                                                                                                                                                       |
| fig 6666666.28482.peg.1014 | Contig_120 | 4752  | 6101  | + | FIG01124584:<br>hypothetical protein                    | FIG00863066 | ff                                                                                                                                                                                                                                                                    |
| fig 6666666.28482.peg.1015 | Contig_120 | 6563  | 6105  | - | hypothetical protein                                    |             |                                                                                                                                                                                                                                                                       |
| fig 6666666.28482.peg.1016 | Contig_120 | 7315  | 6560  | - | Beta-lactamase-like<br>protein                          | FIG01478403 | ff                                                                                                                                                                                                                                                                    |
| fig 6666666.28482.peg.1017 | Contig_120 | 7357  | 8367  | + | F420-dependent glucose-<br>6-phosphate<br>dehydrogenase | FIG01001620 | ff                                                                                                                                                                                                                                                                    |
| fig 6666666.28482.peg.1018 | Contig_120 | 8360  | 10444 | + | Phosphate<br>acetyltransferase (EC<br>2.3.1.8)          | FIG00000522 | icw(1);Pyruvate_metabolism_II:_acet<br>yl-CoA,_acetogenesis_from_pyruvate<br>isu;Ethanolamine_utilization<br>isu;Fermentations:_Lactate<br>isu;Fermentations:_Mixed_acid<br>isu;Propanediol_utilization<br>isu;Threonine_anaerobic_catabolism<br>_gene_cluster        |
| fig 6666666.28482.peg.1019 | Contig_120 | 10458 | 11594 | + | Acetate kinase (EC<br>2.7.2.1)                          | FIG00067248 | isu;Pyruvate_metabolism_II:_acetyl-<br>CoA,_acetogenesis_from_pyruvate<br>icw(1);Ethanolamine_utilization<br>icw(1);Fermentations:_Lactate<br>icw(1);Fermentations:_Mixed_acid<br>isu;CBSS-257314.1.peg.752<br>icw(1);Threonine_anaerobic_cataboli<br>sm_gene_cluster |

|                            |            |       |       |   |                                                                                            |             |                             |
|----------------------------|------------|-------|-------|---|--------------------------------------------------------------------------------------------|-------------|-----------------------------|
| fig 6666666.28482.peg.1020 | Contig_120 | 12776 | 11583 | - | FIG00828616:<br>hypothetical protein                                                       | FIG00828614 | ff                          |
| fig 6666666.28482.peg.1021 | Contig_120 | 14101 | 12779 | - | FIG00825805:<br>hypothetical protein                                                       | FIG00825804 | ff                          |
| fig 6666666.28482.peg.1022 | Contig_120 | 14283 | 15134 | + | FIG00821524:<br>hypothetical protein                                                       | FIG00821522 | ff                          |
| fig 6666666.28482.peg.1023 | Contig_120 | 15304 | 15188 | - | hypothetical protein                                                                       |             |                             |
| fig 6666666.28482.peg.1024 | Contig_120 | 17587 | 15329 | - | serine/threonine protein<br>kinase                                                         | FIG00723707 | ff                          |
| fig 6666666.28482.peg.1025 | Contig_120 | 18549 | 17587 | - | "Glutamine ABC<br>transporter, periplasmic<br>glutamine-binding<br>protein (TC 3.A.1.3.2)" | FIG00545941 | ff                          |
| fig 6666666.28482.peg.1026 | Contig_120 | 19865 | 18546 | - | Possible membrane<br>protein                                                               | FIG01121868 | ff                          |
| fig 6666666.28482.peg.1027 | Contig_120 | 19989 | 20621 | + | "Possible mutator<br>protein MutT3 (7,8-<br>dihydro-8-oxoguanine-<br>triphosphatase) "     | FIG00994542 | ff                          |
| fig 6666666.28482.peg.1028 | Contig_120 | 21261 | 20593 | - | Thiamin-phosphate<br>pyrophosphorylase (EC<br>2.5.1.3)                                     | FIG00000407 | icw(2);Thiamin_biosynthesis |
| fig 6666666.28482.peg.1029 | Contig_120 | 21391 | 22398 | + | Glycine oxidase ThiO (EC<br>1.4.3.19)                                                      | FIG00001017 | isu;Thiamin_biosynthesis    |
| fig 6666666.28482.peg.1030 | Contig_120 | 22395 | 22592 | + | Sulfur carrier protein ThiS                                                                | FIG00058747 | icw(3);Thiamin_biosynthesis |
| fig 6666666.28482.peg.1031 | Contig_120 | 22696 | 23400 | + | Thiazole biosynthesis<br>protein ThiG                                                      | FIG00000563 | icw(1);Thiamin_biosynthesis |
| fig 6666666.28482.peg.1032 | Contig_120 | 23409 | 24164 | + | putative secreted<br>hydrolase                                                             | FIG01121198 | ff                          |
| fig 6666666.28482.peg.1033 | Contig_120 | 24693 | 24169 | - | FIG00825681:<br>hypothetical protein                                                       | FIG00825678 | ff                          |

|                            |            |       |       |   |                                                                  |             |                                   |
|----------------------------|------------|-------|-------|---|------------------------------------------------------------------|-------------|-----------------------------------|
| fig 6666666.28482.peg.1034 | Contig_120 | 25274 | 24747 | - | FIG00825681:<br>hypothetical protein                             | FIG00825678 | ff                                |
| fig 6666666.28482.peg.1035 | Contig_120 | 25694 | 25945 | + | FIG00828114:<br>hypothetical protein                             | FIG00828109 | ff                                |
| fig 6666666.28482.peg.1036 | Contig_120 | 25994 | 26386 | + | FIG00828332:<br>hypothetical protein                             | FIG00828331 | ff                                |
| fig 6666666.28482.peg.1037 | Contig_120 | 26406 | 27860 | + | Aminopeptidase Y (Arg,<br>Lys, Leu preference) (EC<br>3.4.11.15) | FIG00004058 | isu;Aminopeptidases_(EC_3.4.11.-) |
| fig 6666666.28482.peg.1038 | Contig_120 | 27857 | 29329 | + | Aminopeptidase Y<br>precursor (EC 3.4.11.-)                      | FIG00824150 | ff                                |
| fig 6666666.28482.peg.1039 | Contig_121 | 1018  | 1467  | + | FIG00825618:<br>hypothetical protein                             | FIG00825617 | ff                                |
| fig 6666666.28482.peg.1040 | Contig_121 | 1580  | 2710  | + | 2-nitropropane<br>dioxygenase (EC<br>1.13.11.32)                 | FIG01304356 | idu(5);CBSS-164757.7.peg.5020     |
| fig 6666666.28482.peg.1041 | Contig_121 | 2959  | 2717  | - | FIG00822024:<br>hypothetical protein                             | FIG00822023 | ff                                |
| fig 6666666.28482.peg.1042 | Contig_121 | 3314  | 3024  | - | Possible membrane<br>protein                                     | FIG01121868 | ff                                |
| fig 6666666.28482.peg.1043 | Contig_121 | 3737  | 3327  | - | Possible membrane<br>protein                                     | FIG01121868 | ff                                |
| fig 6666666.28482.peg.1044 | Contig_121 | 4362  | 3775  | - | Dihydrofolate reductase<br>(EC 1.5.1.3)                          | FIG00000048 | idu(3);Folate_Biosynthesis        |
| fig 6666666.28482.peg.1045 | Contig_121 | 4550  | 5827  | + | Cytochrome P450 124                                              | FIG00821294 | ff                                |
| fig 6666666.28482.peg.1046 | Contig_122 | 608   | 769   | + | hypothetical protein                                             |             |                                   |
| fig 6666666.28482.peg.1047 | Contig_122 | 915   | 2669  | + | drug transporter                                                 |             |                                   |
| fig 6666666.28482.peg.1048 | Contig_122 | 6225  | 2833  | - | Superfamily I DNA and<br>RNA helicases and<br>helicase subunits  | FIG01310944 | ff                                |
| fig 6666666.28482.peg.1049 | Contig_122 | 6393  | 6752  | + | hypothetical protein                                             |             |                                   |

|                            |            |      |       |   |                                                                           |             |                                                                                                                                                                                                                                        |
|----------------------------|------------|------|-------|---|---------------------------------------------------------------------------|-------------|----------------------------------------------------------------------------------------------------------------------------------------------------------------------------------------------------------------------------------------|
| fig 6666666.28482.peg.1050 | Contig_123 | 228  | 632   | + | FIG00822480:<br>hypothetical protein                                      | FIG00822479 | ff                                                                                                                                                                                                                                     |
| fig 6666666.28482.peg.1051 | Contig_123 | 1365 | 646   | - | Cell division protein DivIC (FtsB), stabilizes FtsL against RasP cleavage | FIG00485194 | idu(10);Possible_new_toxin-antitoxin_system_including_DivIC<br>idu(10);Bacterial_Cell_Division<br>idu(10);Cell_division-ribosomal_stress_proteins_cluster<br>idu(10);Bacterial_Cytoskeleton<br>idu(10);Stationary_phase_repair_cluster |
| fig 6666666.28482.peg.1052 | Contig_123 | 1413 | 2438  | + | Quinone oxidoreductase (EC 1.6.5.5)                                       | FIG00002982 | idu(7);Quinone_oxidoreductase_family                                                                                                                                                                                                   |
| fig 6666666.28482.peg.1053 | Contig_123 | 3055 | 2435  | - | hypothetical protein                                                      |             |                                                                                                                                                                                                                                        |
| fig 6666666.28482.peg.1054 | Contig_123 | 3174 | 3626  | + | Transcriptional regulator, MarR family                                    |             |                                                                                                                                                                                                                                        |
| fig 6666666.28482.peg.1055 | Contig_123 | 3784 | 4617  | + | FIG00820744:<br>hypothetical protein                                      | FIG00820743 | ff                                                                                                                                                                                                                                     |
| fig 6666666.28482.peg.1056 | Contig_123 | 6147 | 4618  | - | FIG00827250:<br>hypothetical protein                                      | FIG00827249 | ff                                                                                                                                                                                                                                     |
| fig 6666666.28482.peg.1057 | Contig_123 | 6412 | 6182  | - | hypothetical protein                                                      |             |                                                                                                                                                                                                                                        |
| fig 6666666.28482.peg.1058 | Contig_123 | 6519 | 6824  | + | FIG00820008:<br>hypothetical protein                                      | FIG00820007 | ff                                                                                                                                                                                                                                     |
| fig 6666666.28482.peg.1059 | Contig_123 | 6845 | 7516  | + | FIG00821508:<br>hypothetical protein                                      | FIG00821507 | ff                                                                                                                                                                                                                                     |
| fig 6666666.28482.peg.1060 | Contig_123 | 7543 | 8223  | + | FIG00823582:<br>hypothetical protein                                      | FIG00823581 | ff                                                                                                                                                                                                                                     |
| fig 6666666.28482.peg.1061 | Contig_123 | 8939 | 8214  | - | FIG00822574:<br>hypothetical protein                                      | FIG00822573 | ff                                                                                                                                                                                                                                     |
| fig 6666666.28482.peg.1062 | Contig_123 | 8964 | 10460 | + | INTEGRAL MEMBRANE PROTEIN (Rhomboid family)                               | FIG00525068 | ff                                                                                                                                                                                                                                     |

|                            |            |       |       |   |                                                           |             |                                                                                                              |
|----------------------------|------------|-------|-------|---|-----------------------------------------------------------|-------------|--------------------------------------------------------------------------------------------------------------|
| fig 6666666.28482.peg.1063 | Contig_123 | 10521 | 11303 | + | 3-oxoacyl-[acyl-carrier protein] reductase (EC 1.1.1.100) | FIG00621114 | idu(38);CBSS-246196.1.peg.364<br>idu(38);CBSS-164757.7.peg.5020<br>idu(38);Fatty_Acid_Biosynthesis_FASI<br>I |
| fig 6666666.28482.peg.1064 | Contig_123 | 11480 | 12661 | + | PE-PGRS FAMILY<br>PROTEIN                                 |             |                                                                                                              |
| fig 6666666.28482.peg.1065 | Contig_123 | 13177 | 12674 | - | PE_PGRS family protein                                    |             |                                                                                                              |
| fig 6666666.28482.peg.1066 | Contig_123 | 14295 | 13312 | - | Ketol-acid<br>reductoisomerase (EC 1.1.1.86)              |             | idu(1);Branched-<br>Chain_Amino_Acid_Biosynthesis<br>idu(1);Coenzyme_A_Biosynthesis                          |
| fig 6666666.28482.peg.1067 | Contig_123 | 14444 | 15889 | + | PE-PGRS family protein                                    |             | idu(16);PPE_gene_cluster_in_Mycob<br>acteria                                                                 |
| fig 6666666.28482.peg.1068 | Contig_123 | 15930 | 16526 | + | probable cutinase(<br>EC:3.1.1.74 )                       |             |                                                                                                              |
| fig 6666666.28482.peg.1069 | Contig_123 | 18736 | 16532 | - | hypothetical protein                                      |             |                                                                                                              |
| fig 6666666.28482.peg.1070 | Contig_123 | 18837 | 19814 | + | Methylthioribose-1-<br>phosphate isomerase (EC 5.3.1.23)  | FIG00001494 | isu;Methionine_Salvage                                                                                       |
| fig 6666666.28482.rna.14   | Contig_123 | 19905 | 19835 | - | tRNA-Gly-CCC                                              |             | isu;tRNAs                                                                                                    |
| fig 6666666.28482.peg.1071 | Contig_123 | 20403 | 20098 | - | hypothetical protein                                      |             |                                                                                                              |
| fig 6666666.28482.peg.1072 | Contig_123 | 20851 | 21378 | + | Possible conserved<br>exported protein                    | FIG01343981 | ff                                                                                                           |
| fig 6666666.28482.peg.1073 | Contig_123 | 21420 | 21992 | + | Deoxycytidine<br>triphosphate deaminase<br>(EC 3.5.4.13)  | FIG00102132 | isu;pyrimidine_conversions                                                                                   |
| fig 6666666.28482.peg.1074 | Contig_123 | 22100 | 24046 | + | FIG00825295:<br>hypothetical protein                      | FIG00825293 | ff                                                                                                           |
| fig 6666666.28482.peg.1075 | Contig_123 | 24318 | 25757 | + | FIG00827027:<br>hypothetical protein                      | FIG00827021 | ff                                                                                                           |

|                            |            |       |       |   |                                            |             |                                                                           |
|----------------------------|------------|-------|-------|---|--------------------------------------------|-------------|---------------------------------------------------------------------------|
| fig 6666666.28482.peg.1076 | Contig_123 | 25860 | 26972 | + | FIG00830582:<br>hypothetical protein       | FIG00830581 | ff                                                                        |
| fig 6666666.28482.peg.1077 | Contig_124 | 809   | 2368  | + | CONSERVED MEMBRANE<br>PROTEIN              | FIG00818075 | ff                                                                        |
| fig 6666666.28482.peg.1078 | Contig_124 | 2476  | 3324  | + | FIG00821758:<br>hypothetical protein       | FIG00821757 | ff                                                                        |
| fig 6666666.28482.peg.1079 | Contig_124 | 4590  | 3379  | - | Arginine deiminase (EC<br>3.5.3.6)         | FIG00001104 | isu;Arginine_and_Ornithine_Degrada<br>tion isu;Arginine_Deiminase_Pathway |
| fig 6666666.28482.peg.1080 | Contig_124 | 4652  | 5257  | + | Alkylated DNA repair<br>protein AlkB       | FIG00001574 | isu;DNA_repair,_bacterial                                                 |
| fig 6666666.28482.peg.1081 | Contig_124 | 6039  | 5383  | - | FIG00820856:<br>hypothetical protein       | FIG00820854 | ff                                                                        |
| fig 6666666.28482.peg.1082 | Contig_124 | 6741  | 6067  | - | FIG00821923:<br>hypothetical protein       | FIG00821922 | ff                                                                        |
| fig 6666666.28482.peg.1083 | Contig_124 | 7800  | 6748  | - | cyclic nucleotide-binding<br>protein       | FIG01328426 | ff                                                                        |
| fig 6666666.28482.peg.1084 | Contig_124 | 8427  | 7804  | - | hypothetical protein                       | FIG00638284 | ff                                                                        |
| fig 6666666.28482.peg.1085 | Contig_124 | 8565  | 9770  | + | Type VII secretion<br>protein EccE         | FIG00822757 | idu(1);PPE_gene_cluster_in_Mycobac<br>teria                               |
| fig 6666666.28482.peg.1086 | Contig_124 | 10679 | 9783  | - | NAD-dependent<br>epimerase/dehydratase     |             |                                                                           |
| fig 6666666.28482.peg.1087 | Contig_124 | 12286 | 10691 | - | 4Fe-4S ferredoxin, iron-<br>sulfur binding |             | idu(1);Inorganic_Sulfur_Assimilation                                      |
| fig 6666666.28482.peg.1088 | Contig_124 | 12602 | 13474 | + | hypothetical protein                       | FIG00638284 | ff                                                                        |
| fig 6666666.28482.peg.1089 | Contig_124 | 13679 | 13515 | - | hypothetical protein                       |             |                                                                           |
| fig 6666666.28482.peg.1090 | Contig_124 | 13690 | 14550 | + | acyltransferase 3                          |             |                                                                           |

|                            |            |       |       |   |                                                                              |             |                                                                                      |
|----------------------------|------------|-------|-------|---|------------------------------------------------------------------------------|-------------|--------------------------------------------------------------------------------------|
| fig 6666666.28482.peg.1091 | Contig_124 | 14560 | 15615 | + | Putative N-acetylglactosaminyl-diphosphoundecaprenol glucuronosyltransferase |             | isu;Teichuronic_acid_biosynthesis                                                    |
| fig 6666666.28482.peg.1092 | Contig_124 | 16227 | 15616 | - | D-glycero-D-manno-heptose 1,7-bisphosphate phosphatase (EC 3.1.1.-)          | FIG00001235 | icw(1);LOS_core_oligosaccharide_biosynthesis<br>icw(2);Capsular_heptose_biosynthesis |
| fig 6666666.28482.peg.1093 | Contig_124 | 17438 | 16263 | - | Glycosyl transferase, group 1                                                |             |                                                                                      |
| fig 6666666.28482.peg.1094 | Contig_124 | 18145 | 17507 | - | Phosphoheptose isomerase 1 (EC 5.3.1.-)                                      | FIG00002799 | idu(2);LOS_core_oligosaccharide_biosynthesis<br>idu(2);Capsular_heptose_biosynthesis |
| fig 6666666.28482.peg.1095 | Contig_124 | 19101 | 18130 | - | D,D-heptose 7-phosphate kinase                                               | FIG00009038 | icw(1);Capsular_heptose_biosynthesis                                                 |
| fig 6666666.28482.peg.1096 | Contig_124 | 19650 | 19447 | - | hypothetical protein                                                         |             |                                                                                      |
| fig 6666666.28482.peg.1097 | Contig_124 | 19633 | 20478 | + | hypothetical protein                                                         | FIG00638284 | ff                                                                                   |
| fig 6666666.28482.peg.1098 | Contig_124 | 20518 | 21546 | + | hypothetical protein                                                         |             |                                                                                      |
| fig 6666666.28482.peg.1099 | Contig_124 | 21715 | 22425 | + | hypothetical protein                                                         |             |                                                                                      |
| fig 6666666.28482.peg.1100 | Contig_124 | 22741 | 24909 | + | O-antigen acetylase                                                          | FIG01370327 | ff                                                                                   |
| fig 6666666.28482.peg.1101 | Contig_124 | 24931 | 26205 | + | hypothetical protein                                                         | FIG00638284 | ff                                                                                   |
| fig 6666666.28482.peg.1102 | Contig_124 | 26275 | 27126 | + | Macrocin-O-methyltransferase                                                 |             |                                                                                      |
| fig 6666666.28482.peg.1103 | Contig_124 | 27723 | 27154 | - | hypothetical protein                                                         |             |                                                                                      |
| fig 6666666.28482.peg.1104 | Contig_124 | 29915 | 27756 | - | hypothetical protein                                                         | FIG00638284 | ff                                                                                   |
| fig 6666666.28482.peg.1105 | Contig_124 | 31333 | 29912 | - | hypothetical protein                                                         | FIG00638284 | ff                                                                                   |

|                            |            |       |       |   |                                                         |             |                                                                                                                                                            |
|----------------------------|------------|-------|-------|---|---------------------------------------------------------|-------------|------------------------------------------------------------------------------------------------------------------------------------------------------------|
| fig 6666666.28482.peg.1106 | Contig_124 | 31523 | 32746 | + | PROBABLE CONSERVED<br>TRANSMEMBRANE<br>PROTEIN          | FIG00662132 | ff                                                                                                                                                         |
| fig 6666666.28482.peg.1107 | Contig_124 | 32748 | 33263 | + | PROBABLE CONSERVED<br>TRANSMEMBRANE<br>PROTEIN          |             |                                                                                                                                                            |
| fig 6666666.28482.peg.1108 | Contig_124 | 33351 | 35126 | + | hypothetical protein                                    |             |                                                                                                                                                            |
| fig 6666666.28482.peg.1109 | Contig_124 | 35152 | 35568 | + | hypothetical protein                                    |             |                                                                                                                                                            |
| fig 6666666.28482.peg.1110 | Contig_124 | 36025 | 35609 | - | Holo-[acyl-carrier<br>protein] synthase (EC<br>2.7.8.7) |             | idu(1);Fatty_Acid_Biosynthesis_FASII                                                                                                                       |
| fig 6666666.28482.peg.1111 | Contig_124 | 36283 | 36038 | - | Acyl carrier protein                                    | FIG00002328 | icw(1);Fatty_Acid_Biosynthesis_FASII<br>idu(2);Glycerolipid_and_Glycerophos<br>pholipid_Metabolism_in_Bacteria                                             |
| fig 6666666.28482.peg.1112 | Contig_124 | 36505 | 37125 | + | Transcriptional regulator                               | FIG01312420 | ff                                                                                                                                                         |
| fig 6666666.28482.peg.1113 | Contig_124 | 37153 | 37908 | + | hypothetical protein                                    |             |                                                                                                                                                            |
| fig 6666666.28482.peg.1114 | Contig_124 | 38605 | 37925 | - | serine esterase, cutinase<br>family                     | FIG01349249 | ff                                                                                                                                                         |
| fig 6666666.28482.peg.1115 | Contig_124 | 38749 | 40257 | + | Long-chain-fatty-acid--<br>CoA ligase (EC 6.2.1.3)      | FIG00018699 | idu(72);n-<br>Phenylalkanoic_acid_degradation<br>idu(72);Fatty_acid_metabolism_clust<br>er idu(72);Biotin_synthesis_cluster<br>idu(72);Biotin_biosynthesis |
| fig 6666666.28482.peg.1116 | Contig_124 | 40335 | 41723 | + | coenzyme F390<br>synthetase-like protein                |             |                                                                                                                                                            |

|                            |            |       |       |   |                                                                                                                   |             |                                                       |
|----------------------------|------------|-------|-------|---|-------------------------------------------------------------------------------------------------------------------|-------------|-------------------------------------------------------|
| fig 6666666.28482.peg.1117 | Contig_124 | 43002 | 41725 | - | O-acetylhomoserine<br>sulfhydrylase (EC<br>2.5.1.49) / O-<br>succinylhomoserine<br>sulfhydrylase (EC<br>2.5.1.48) | FIG00000417 | ff                                                    |
| fig 6666666.28482.peg.1118 | Contig_124 | 43969 | 43022 | - | Homoserine O-<br>succinyltransferase(<br>EC:2.3.1.46 )                                                            |             |                                                       |
| fig 6666666.28482.peg.1119 | Contig_124 | 45249 | 43975 | - | hypothetical protein                                                                                              | FIG00638284 | ff                                                    |
| fig 6666666.28482.peg.1120 | Contig_124 | 47071 | 45254 | - | hypothetical protein                                                                                              | FIG00638284 | ff                                                    |
| fig 6666666.28482.peg.1121 | Contig_124 | 48210 | 47068 | - | Low-specificity L-<br>threonine aldolase (EC<br>4.1.2.5)                                                          | FIG00000679 | isu;Threonine_degradation<br>isu;Glycine_Biosynthesis |
| fig 6666666.28482.peg.1122 | Contig_125 | 1036  | 617   | - | FIG00821456:<br>hypothetical protein                                                                              | FIG00821455 | ff                                                    |
| fig 6666666.28482.peg.1123 | Contig_126 | 3807  | 1186  | - | hypothetical protein                                                                                              | FIG00638284 | ff                                                    |
| fig 6666666.28482.peg.1124 | Contig_126 | 4703  | 3897  | - | Probable peptidyl-prolyl<br>cis-trans isomerase B (EC<br>5.2.1.8) (PPlase B)<br>(Rotamase B)                      | FIG01123881 | ff                                                    |
| fig 6666666.28482.peg.1125 | Contig_127 | 1006  | 86    | - | tRNA delta(2)-<br>isopentenylpyrophosphat<br>e transferase (EC 2.5.1.8)                                           | FIG00000196 | ff                                                    |
| fig 6666666.28482.peg.1126 | Contig_127 | 1686  | 1003  | - | FIG01121091:<br>hypothetical protein                                                                              | FIG00820084 | ff                                                    |
| fig 6666666.28482.peg.1127 | Contig_127 | 2660  | 1707  | - | hypothetical protein                                                                                              | FIG00638284 | ff                                                    |
| fig 6666666.28482.peg.1128 | Contig_127 | 3286  | 4512  | + | ATPase involved in DNA<br>repair                                                                                  | FIG00945813 | ff                                                    |
| fig 6666666.28482.peg.1129 | Contig_127 | 5102  | 4509  | - | Possible membrane<br>protein                                                                                      | FIG01121868 | ff                                                    |

|                            |            |       |       |   |                                            |             |                                                                                                                                                                                                |
|----------------------------|------------|-------|-------|---|--------------------------------------------|-------------|------------------------------------------------------------------------------------------------------------------------------------------------------------------------------------------------|
| fig 6666666.28482.peg.1130 | Contig_127 | 6544  | 5099  | - | tRNA-i(6)A37<br>methylthiotransferase      | FIG00108342 | isu;tRNA_processing<br>isu;Methylthiotransferases                                                                                                                                              |
| fig 6666666.28482.peg.1131 | Contig_127 | 7177  | 6659  | - | Regulatory protein RecX                    | FIG00004099 | icw(1);DNA_repair_system_including<br>_RecA,_MutS_and_a_hypothetical_pr<br>otein icw(1);RecA_and_RecX                                                                                          |
| fig 6666666.28482.peg.1132 | Contig_127 | 8183  | 7143  | - | RecA protein                               | FIG00000234 | isu;DNA_repair,_bacterial_UmuCD_sy<br>stem isu;DNA-replication<br>isu;DNA_repair_system_including_Re<br>cA,_MutS_and_a_hypothetical_prote<br>in isu;RecA_and_RecX<br>isu;DNA_repair,_bacterial |
| fig 6666666.28482.peg.1133 | Contig_127 | 8521  | 9192  | + | FIG00826822:<br>hypothetical protein       | FIG00826821 | ff                                                                                                                                                                                             |
| fig 6666666.28482.peg.1134 | Contig_127 | 9487  | 9281  | - | FIG00820724:<br>hypothetical protein       | FIG00820722 | ff                                                                                                                                                                                             |
| fig 6666666.28482.peg.1135 | Contig_127 | 10664 | 9498  | - | Alanine rich transferase                   | FIG00821690 | ff                                                                                                                                                                                             |
| fig 6666666.28482.peg.1136 | Contig_127 | 10728 | 11159 | + | FIG00820841:<br>hypothetical protein       | FIG00820839 | ff                                                                                                                                                                                             |
| fig 6666666.28482.peg.1137 | Contig_128 | 101   | 2179  | + | DNA ligase (EC 6.5.1.2)                    | FIG00051439 | isu;DNA_Repair_Base_Excision<br>isu;CBSS-393121.3.peg.1913                                                                                                                                     |
| fig 6666666.28482.peg.1138 | Contig_128 | 2248  | 3300  | + | Cystathionine gamma-<br>lyase (EC 4.4.1.1) | FIG00001346 | idu(1);Cysteine_Biosynthesis                                                                                                                                                                   |
| fig 6666666.28482.peg.1139 | Contig_128 | 3297  | 3971  | + | hypothetical protein                       |             |                                                                                                                                                                                                |
| fig 6666666.28482.peg.1140 | Contig_128 | 4642  | 3977  | - | FIG00820558:<br>hypothetical protein       | FIG00820556 | ff                                                                                                                                                                                             |

|                            |            |       |       |   |                                                                                                                                         |             |                                                                                                                |
|----------------------------|------------|-------|-------|---|-----------------------------------------------------------------------------------------------------------------------------------------|-------------|----------------------------------------------------------------------------------------------------------------|
| fig 6666666.28482.peg.1141 | Contig_128 | 4785  | 5084  | + | Aspartyl-tRNA(Asn)<br>amidotransferase subunit<br>C (EC 6.3.5.6) @ Glutamyl-<br>tRNA(Gln)<br>amidotransferase subunit<br>C (EC 6.3.5.7) | FIG00000432 | isu;tRNA_aminoacylation,_Asp_and_<br>Asn<br>icw(2);tRNA_aminoacylation,_Glu_an<br>d_Gln                        |
| fig 6666666.28482.peg.1142 | Contig_128 | 5081  | 6568  | + | Aspartyl-tRNA(Asn)<br>amidotransferase subunit<br>A (EC 6.3.5.6) @<br>Glutamyl-tRNA(Gln)<br>amidotransferase subunit<br>A (EC 6.3.5.7)  | FIG00000359 | icw(2);tRNA_aminoacylation,_Asp_an<br>d_Asn<br>isu;tRNA_aminoacylation,_Glu_and_<br>Gln                        |
| fig 6666666.28482.peg.1143 | Contig_128 | 6623  | 7654  | + | 6-phosphofructokinase<br>(EC 2.7.1.11)                                                                                                  | FIG00058830 | isu;N-Acetyl-<br>Galactosamine_and_Galactosamine_<br>Utilization isu;D-<br>Tagatose_and_Galactitol_Utilization |
| fig 6666666.28482.peg.1144 | Contig_128 | 7783  | 8931  | + | FIG00828598:<br>hypothetical protein                                                                                                    | FIG00828596 | ff                                                                                                             |
| fig 6666666.28482.peg.1145 | Contig_128 | 9002  | 10513 | + | Aspartyl-tRNA(Asn)<br>amidotransferase subunit<br>B (EC 6.3.5.6) @ Glutamyl-<br>tRNA(Gln)<br>amidotransferase subunit<br>B (EC 6.3.5.7) | FIG00000399 | icw(1);tRNA_aminoacylation,_Asp_an<br>d_Asn<br>icw(1);tRNA_aminoacylation,_Glu_an<br>d_Gln                     |
| fig 6666666.28482.peg.1146 | Contig_128 | 10531 | 11085 | + | Oxidoreductase                                                                                                                          | FIG01321859 | ff                                                                                                             |
| fig 6666666.28482.peg.1147 | Contig_128 | 12203 | 11082 | - | Glucose/sorbose<br>dehydrogenase,<br>lipoprotein LppZ                                                                                   | FIG01038209 | ff                                                                                                             |

|                            |            |       |       |   |                                                                                             |             |                                                                                                                                          |
|----------------------------|------------|-------|-------|---|---------------------------------------------------------------------------------------------|-------------|------------------------------------------------------------------------------------------------------------------------------------------|
| fig 6666666.28482.peg.1148 | Contig_128 | 12508 | 13284 | + | Membrane protein 2,<br>distant similarity to<br>thiosulphate:quinone<br>oxidoreductase DoxD | FIG00006938 | ff                                                                                                                                       |
| fig 6666666.28482.peg.1149 | Contig_128 | 13647 | 13288 | - | Low molecular weight<br>protein antigen 6                                                   | FIG01393835 | ff                                                                                                                                       |
| fig 6666666.28482.peg.1150 | Contig_128 | 14044 | 13901 | - | hypothetical protein                                                                        |             |                                                                                                                                          |
| fig 6666666.28482.peg.1151 | Contig_128 | 14016 | 15884 | + | Acetolactate synthase<br>large subunit (EC 2.2.1.6)                                         | FIG00136692 | isu;Acetolactate_synthase_subunits<br>icw(1);Branched-<br>Chain_Amino_Acid_Biosynthesis<br>isu;Acetoin,_butanediol_metabolism            |
| fig 6666666.28482.peg.1152 | Contig_128 | 15884 | 16384 | + | Acetolactate synthase<br>small subunit (EC 2.2.1.6)                                         | FIG00000433 | icw(1);Acetolactate_synthase_subuni<br>ts icw(2);Branched-<br>Chain_Amino_Acid_Biosynthesis<br>icw(1);Acetoin,_butanediol_metaboli<br>sm |
| fig 6666666.28482.peg.1153 | Contig_128 | 16406 | 17419 | + | Ketol-acid<br>reductoisomerase (EC<br>1.1.1.86)                                             | FIG00000244 | idu(1);Branched-<br>Chain_Amino_Acid_Biosynthesis<br>idu(1);Coenzyme_A_Biosynthesis                                                      |
| fig 6666666.28482.peg.1154 | Contig_128 | 18076 | 17459 | - | Trp repressor binding<br>protein                                                            | FIG01227591 | ff                                                                                                                                       |
| fig 6666666.28482.peg.1155 | Contig_128 | 18225 | 18854 | + | putative integral<br>membrane protein<br>(DUF1211)                                          |             |                                                                                                                                          |
| fig 6666666.28482.peg.1156 | Contig_128 | 20277 | 18832 | - | Phytoene dehydrogenase<br>and related proteins                                              | FIG00139162 | ff                                                                                                                                       |
| fig 6666666.28482.peg.1157 | Contig_128 | 20307 | 21893 | + | D-3-phosphoglycerate<br>dehydrogenase (EC<br>1.1.1.95)                                      | FIG00031250 | idu(4);Serine_Biosynthesis<br>idu(4);Pyridoxin_(Vitamin_B6)_Biosy<br>nthesis                                                             |

|                            |            |       |       |   |                                                                                                                                     |             |                                                                                                                                                                                    |
|----------------------------|------------|-------|-------|---|-------------------------------------------------------------------------------------------------------------------------------------|-------------|------------------------------------------------------------------------------------------------------------------------------------------------------------------------------------|
| fig 6666666.28482.peg.1158 | Contig_128 | 24169 | 22805 | - | Integral membrane transport protein                                                                                                 | FIG00820204 | ff                                                                                                                                                                                 |
| fig 6666666.28482.peg.1159 | Contig_128 | 24221 | 25021 | + | 2-hydroxyhepta-2,4-diene-1,7-dioate isomerase (EC 5.3.3.-) / 5-carboxymethyl-2-oxo-hex-3-ene-1,7-dioate decarboxylase (EC 4.1.1.68) | FIG00137538 | isu;Aromatic_amino_acid_degradation<br>isu;Aromatic_amino_acid_degradation<br>isu;4-Hydroxyphenylacetic_acid_catabolic_pathway<br>isu;4-Hydroxyphenylacetic_acid_catabolic_pathway |
| fig 6666666.28482.peg.1160 | Contig_128 | 25018 | 26472 | + | Glutamyl-tRNA synthetase (EC 6.1.1.17) @ Glutamyl-tRNA(Gln) synthetase (EC 6.1.1.24)                                                | FIG00000686 | isu;Heme_and_Siroheme_Biosynthesis<br>isu;tRNA_aminoacylation,_Glu_and_Gln<br>isu;tRNA_aminoacylation,_Glu_and_Gln                                                                 |
| fig 6666666.28482.rna.15   | Contig_128 | 26576 | 26647 | + | tRNA-Gln-CTG                                                                                                                        |             |                                                                                                                                                                                    |
| fig 6666666.28482.rna.16   | Contig_128 | 26720 | 26792 | + | tRNA-Glu-CTC                                                                                                                        |             |                                                                                                                                                                                    |
| fig 6666666.28482.peg.1161 | Contig_128 | 27312 | 26800 | - | FIG00820161: hypothetical protein                                                                                                   | FIG00820156 | ff                                                                                                                                                                                 |
| fig 6666666.28482.peg.1162 | Contig_129 | 1183  | 65    | - | Aminopeptidase YpdF (MP-, MA-, MS-, AP-, NP-specific)                                                                               | FIG00135469 | idu(1);Protein_degradation                                                                                                                                                         |
| fig 6666666.28482.peg.1163 | Contig_129 | 1229  | 1882  | + | Possible membrane protein                                                                                                           | FIG01121868 | ff                                                                                                                                                                                 |
| fig 6666666.28482.peg.1164 | Contig_129 | 2768  | 1893  | - | hypothetical protein                                                                                                                |             |                                                                                                                                                                                    |
| fig 6666666.28482.peg.1165 | Contig_129 | 2904  | 3080  | + | hypothetical protein                                                                                                                |             |                                                                                                                                                                                    |
| fig 6666666.28482.peg.1166 | Contig_129 | 4113  | 3610  | - | dienelactone hydrolase( EC:3.1.1.45 )                                                                                               |             |                                                                                                                                                                                    |

|                            |            |       |       |   |                                                 |             |                                                                                                                                                                       |
|----------------------------|------------|-------|-------|---|-------------------------------------------------|-------------|-----------------------------------------------------------------------------------------------------------------------------------------------------------------------|
| fig 6666666.28482.peg.1167 | Contig_129 | 4628  | 4188  | - | 3-dehydroquinate dehydratase II (EC 4.2.1.10)   | FIG00000430 | isu;Chorismate_Synthesis<br>icw(2);Common_Pathway_For_Synthesis_of_Aromatic_Compounds_(DAHP_synthase_to_chorismate)<br>isu;Quinate_degradation                        |
| fig 6666666.28482.peg.1168 | Contig_129 | 5707  | 4625  | - | 3-dehydroquinate synthase (EC 4.2.3.4)          | FIG00000224 | icw(1);Chorismate_Synthesis<br>icw(3);Common_Pathway_For_Synthesis_of_Aromatic_Compounds_(DAHP_synthase_to_chorismate)                                                |
| fig 6666666.28482.peg.1169 | Contig_129 | 6228  | 5704  | - | Shikimate kinase I (EC 2.7.1.71)                | FIG00000256 | icw(3);Chorismate_Synthesis<br>isu;Common_Pathway_For_Synthesis_of_Aromatic_Compounds_(DAHP_synthase_to_chorismate)<br>isu;Benzoate_transport_and_degradation_cluster |
| fig 6666666.28482.peg.1170 | Contig_129 | 7433  | 6228  | - | Chorismate synthase (EC 4.2.3.5)                | FIG00000212 | icw(2);Chorismate_Synthesis<br>icw(4);Common_Pathway_For_Synthesis_of_Aromatic_Compounds_(DAHP_synthase_to_chorismate)                                                |
| fig 6666666.28482.peg.1171 | Contig_129 | 7882  | 7454  | - | hypothetical protein                            | FIG00638284 | ff                                                                                                                                                                    |
| fig 6666666.28482.peg.1172 | Contig_129 | 8766  | 7993  | - | Shikimate 5-dehydrogenase I alpha (EC 1.1.1.25) | FIG00000022 | icw(4);Chorismate_Synthesis<br>icw(1);Common_Pathway_For_Synthesis_of_Aromatic_Compounds_(DAHP_synthase_to_chorismate)<br>isu;CBSS-281090.3.peg.464                   |
| fig 6666666.28482.peg.1173 | Contig_129 | 10024 | 8777  | - | FIG004453: protein YceG like                    | FIG00004453 | icw(1);CBSS-281090.3.peg.464                                                                                                                                          |
| fig 6666666.28482.peg.1174 | Contig_129 | 10514 | 10017 | - | Putative Holliday junction resolvase YggF       |             | icw(2);CBSS-281090.3.peg.464<br>isu;CBSS-257314.1.peg.488                                                                                                             |

|                            |            |       |       |   |                                                                             |             |                                                                                        |
|----------------------------|------------|-------|-------|---|-----------------------------------------------------------------------------|-------------|----------------------------------------------------------------------------------------|
| fig 6666666.28482.peg.1175 | Contig_129 | 13214 | 10521 | - | Alanyl-tRNA synthetase (EC 6.1.1.7)                                         | FIG00000139 | isu;tRNA_aminoacylation,_Ala icw(3);CBSS-281090.3.peg.464 icw(1);CBSS-257314.1.peg.488 |
| fig 6666666.28482.peg.1176 | Contig_129 | 13678 | 13277 | - | FIG027887: hypothetical protein                                             | FIG01341564 | ff                                                                                     |
| fig 6666666.28482.peg.1177 | Contig_129 | 13838 | 14458 | + | hypothetical protein Rv2558                                                 | FIG01312331 | ff                                                                                     |
| fig 6666666.28482.peg.1178 | Contig_129 | 14571 | 15194 | + | FIG030001: hypothetical protein                                             | FIG01331854 | ff                                                                                     |
| fig 6666666.28482.peg.1179 | Contig_129 | 15655 | 15320 | - | FIG00825855: hypothetical protein                                           | FIG00825851 | ff                                                                                     |
| fig 6666666.28482.peg.1180 | Contig_129 | 16989 | 15652 | - | ATPase, AAA family                                                          | FIG01360707 | ff                                                                                     |
| fig 6666666.28482.peg.1181 | Contig_129 | 17141 | 18130 | + | PROBABLE PROLINE AND GLYCINE RICH TRANSMEMBRANE PROTEIN                     | FIG01320781 | ff                                                                                     |
| fig 6666666.28482.peg.1182 | Contig_129 | 18194 | 21532 | + | Large protein containing transglutaminase-like domain                       | FIG00687328 | ff                                                                                     |
| fig 6666666.28482.peg.1183 | Contig_129 | 21533 | 24163 | + | Protein containing domains DUF404, DUF407, DUF403                           | FIG00998060 | ff                                                                                     |
| fig 6666666.28482.peg.1184 | Contig_129 | 25225 | 24170 | - | FIG00821164: hypothetical protein                                           | FIG00821160 | ff                                                                                     |
| fig 6666666.28482.peg.1185 | Contig_129 | 26150 | 25218 | - | Protein containing transglutaminase-like domain, putative cysteine protease | FIG00453060 | ff                                                                                     |
| fig 6666666.28482.peg.1186 | Contig_129 | 26223 | 26612 | + | FIG00822845: hypothetical protein                                           | FIG00822842 | ff                                                                                     |
| fig 6666666.28482.peg.1187 | Contig_129 | 27638 | 26607 | - | hypothetical protein                                                        |             |                                                                                        |
| fig 6666666.28482.peg.1188 | Contig_129 | 28080 | 27649 | - | AcIj                                                                        | FIG00862767 | ff                                                                                     |

|                            |            |       |       |   |                                                                                      |             |                                                                                                                                                                                                                                        |
|----------------------------|------------|-------|-------|---|--------------------------------------------------------------------------------------|-------------|----------------------------------------------------------------------------------------------------------------------------------------------------------------------------------------------------------------------------------------|
| fig 6666666.28482.peg.1189 | Contig_129 | 29852 | 28077 | - | Aspartyl-tRNA synthetase (EC 6.1.1.12) @ Aspartyl-tRNA(Asn) synthetase (EC 6.1.1.23) | FIG00000656 | isu;tRNA_aminoacylation,_Asp_and_Asn<br>isu;tRNA_aminoacylation,_Asp_and_Asn                                                                                                                                                           |
| fig 6666666.28482.peg.1190 | Contig_129 | 29932 | 30879 | + | hypothetical protein                                                                 | FIG00638284 | ff                                                                                                                                                                                                                                     |
| fig 6666666.28482.peg.1191 | Contig_129 | 30974 | 31780 | + | 2-dehydropantoate 2-reductase (EC 1.1.1.169)                                         | FIG00034973 | isu;Coenzyme_A_Biosynthesis                                                                                                                                                                                                            |
| fig 6666666.28482.peg.1192 | Contig_129 | 31790 | 32293 | + | FIG00820672:<br>hypothetical protein                                                 | FIG00820671 | ff                                                                                                                                                                                                                                     |
| fig 6666666.28482.peg.1193 | Contig_129 | 32303 | 33181 | + | YpfJ protein, zinc metalloprotease superfamily                                       | FIG00003100 | isu;Broadly_distributed_proteins_not_in_subsystems                                                                                                                                                                                     |
| fig 6666666.28482.peg.1194 | Contig_129 | 33188 | 34801 | + | protein of unknown function DUF894, DltE                                             |             |                                                                                                                                                                                                                                        |
| fig 6666666.28482.peg.1195 | Contig_129 | 35217 | 34816 | - | Cell division protein DivIC (FtsB), stabilizes FtsL against RasP cleavage            | FIG00485194 | idu(10);Possible_new_toxin-antitoxin_system_including_DivIC<br>idu(10);Bacterial_Cell_Division<br>idu(10);Cell_division-ribosomal_stress_proteins_cluster<br>idu(10);Bacterial_Cytoskeleton<br>idu(10);Stationary_phase_repair_cluster |
| fig 6666666.28482.peg.1196 | Contig_129 | 35284 | 36849 | + | Acid phosphatase (EC 3.1.3.2)                                                        | FIG01328760 | ff                                                                                                                                                                                                                                     |
| fig 6666666.28482.peg.1197 | Contig_129 | 37870 | 36851 | - | Radical SAM domain protein                                                           | FIG00741867 | ff                                                                                                                                                                                                                                     |
| fig 6666666.28482.peg.1198 | Contig_129 | 37923 | 38801 | + | Haloalkane dehalogenase (EC 3.8.1.5)                                                 | FIG01364259 | ff                                                                                                                                                                                                                                     |
| fig 6666666.28482.peg.1199 | Contig_129 | 39025 | 38798 | - | hypothetical protein                                                                 |             |                                                                                                                                                                                                                                        |

|                            |            |       |       |   |                              |                                                  |
|----------------------------|------------|-------|-------|---|------------------------------|--------------------------------------------------|
| fig 6666666.28482.peg.1200 | Contig_129 | 39660 | 39118 | - | EBNA-1                       |                                                  |
| fig 6666666.28482.peg.1201 | Contig_129 | 39655 | 39876 | + | hypothetical protein         |                                                  |
| fig 6666666.28482.peg.1202 | Contig_13  | 468   | 1340  | + | FIG00825062:                 | FIG00825059 ff                                   |
|                            |            |       |       |   | hypothetical protein         |                                                  |
| fig 6666666.28482.peg.1203 | Contig_13  | 1410  | 2129  | + | Putative secreted protein    | FIG01353358 ff                                   |
| fig 6666666.28482.peg.1204 | Contig_13  | 2624  | 11851 | + | [Acyl-carrier-protein]       | FIG01318712 ff                                   |
|                            |            |       |       |   | acetyl transferase of FASI   |                                                  |
|                            |            |       |       |   | (EC 2.3.1.38) / Enoyl-[acyl- |                                                  |
|                            |            |       |       |   | carrier-protein]             |                                                  |
|                            |            |       |       |   | reductase of FASI (EC        |                                                  |
|                            |            |       |       |   | 1.3.1.9) / 3-                |                                                  |
|                            |            |       |       |   | hydroxypalmitoyl-[acyl-      |                                                  |
|                            |            |       |       |   | carrier-protein]             |                                                  |
|                            |            |       |       |   | dehydratase of FASI (EC      |                                                  |
|                            |            |       |       |   | 4.2.1.61) / [Acyl-carrier-   |                                                  |
|                            |            |       |       |   | protein] malonyl             |                                                  |
|                            |            |       |       |   | transferase of FASI (EC      |                                                  |
|                            |            |       |       |   | 2.3.1.39) / [Acyl-carrier-   |                                                  |
|                            |            |       |       |   | protein] palmitoyl           |                                                  |
|                            |            |       |       |   | transferase of FASI (EC      |                                                  |
|                            |            |       |       |   | 2.3.1.-) / Acyl carrier      |                                                  |
|                            |            |       |       |   | protein of FASI / 3-         |                                                  |
|                            |            |       |       |   | oxoacyl-[acyl-carrier-       |                                                  |
|                            |            |       |       |   | protein] reductase of        |                                                  |
|                            |            |       |       |   | FASI (EC 1.1.1.100) / 3-     |                                                  |
|                            |            |       |       |   | oxoacyl-[acyl-carrier-       |                                                  |
|                            |            |       |       |   | protein] synthase of FASI    |                                                  |
|                            |            |       |       |   | (EC 2.3.1.41)                |                                                  |
| fig 6666666.28482.peg.1205 | Contig_13  | 11880 | 12272 | + | Holo-[acyl-carrier           | FIG00000540 idu(1);Fatty_Acid_Biosynthesis_FASII |
|                            |            |       |       |   | protein] synthase (EC        |                                                  |
|                            |            |       |       |   | 2.7.8.7)                     |                                                  |

|                            |           |       |       |   |                                                                                                |             |                                                                   |
|----------------------------|-----------|-------|-------|---|------------------------------------------------------------------------------------------------|-------------|-------------------------------------------------------------------|
| fig 6666666.28482.peg.1206 | Contig_13 | 12305 | 13609 | + | Catalyzes the cleavage of p-aminobenzoyl-glutamate to p-aminobenzoate and glutamate, subunit A | FIG00001384 | ff                                                                |
| fig 6666666.28482.peg.1207 | Contig_13 | 13994 | 13614 | - | POSSIBLE CONSERVED MEMBRANE PROTEIN                                                            |             |                                                                   |
| fig 6666666.28482.peg.1208 | Contig_13 | 14304 | 14663 | + | hypothetical protein                                                                           |             |                                                                   |
| fig 6666666.28482.peg.1209 | Contig_13 | 15170 | 14691 | - | Thiol peroxidase, Bcp-type (EC 1.11.1.15)                                                      | FIG00132548 | isu;CBSS-316057.3.peg.3521<br>isu;Thioredoxin-disulfide_reductase |
| fig 6666666.28482.peg.1210 | Contig_13 | 15275 | 15502 | + | hypothetical protein                                                                           |             |                                                                   |
| fig 6666666.28482.peg.1211 | Contig_13 | 16243 | 16668 | + | membrane protein, MmpS family                                                                  | FIG01309473 | ff                                                                |
| fig 6666666.28482.peg.1212 | Contig_13 | 16665 | 19622 | + | Putative membrane protein                                                                      | FIG01056920 | ff                                                                |
| fig 6666666.28482.rna.17   | Contig_13 | 19723 | 19651 | - | tRNA-Lys-CTT                                                                                   |             |                                                                   |
| fig 6666666.28482.peg.1213 | Contig_13 | 21108 | 19870 | - | FIG00826393: hypothetical protein                                                              | FIG01312095 | ff                                                                |
| fig 6666666.28482.peg.1214 | Contig_13 | 21283 | 23643 | + | Transmembrane transport protein MmpL13b                                                        | FIG01314334 | ff                                                                |
| fig 6666666.28482.peg.1215 | Contig_13 | 23636 | 24529 | + | FIG00820849: hypothetical protein                                                              | FIG00820848 | ff                                                                |
| fig 6666666.28482.peg.1216 | Contig_13 | 24648 | 25871 | + | ErfK/YbiS/YcfS/YnhG family protein                                                             | FIG01228918 | ff                                                                |
| fig 6666666.28482.peg.1217 | Contig_13 | 25959 | 26249 | + | hypothetical protein                                                                           |             |                                                                   |
| fig 6666666.28482.peg.1218 | Contig_13 | 26688 | 28253 | + | DNA polymerase III, subunit epsilon (dnaQ)                                                     |             |                                                                   |
| fig 6666666.28482.peg.1219 | Contig_13 | 29148 | 28528 | - | hypothetical protein                                                                           | FIG00638284 | ff                                                                |
| fig 6666666.28482.rna.18   | Contig_13 | 30242 | 30170 | - | tRNA-His-GTG                                                                                   |             |                                                                   |

|                            |           |       |       |   |                                                                                           |             |                                                                                                                                                                                                                                                                                 |
|----------------------------|-----------|-------|-------|---|-------------------------------------------------------------------------------------------|-------------|---------------------------------------------------------------------------------------------------------------------------------------------------------------------------------------------------------------------------------------------------------------------------------|
| fig 6666666.28482.peg.1220 | Contig_13 | 30943 | 30296 | - | 3'-to-5' oligoribonuclease (orn)                                                          | FIG00001097 | isu;RNA_processing_and_degradation,_bacterial                                                                                                                                                                                                                                   |
| fig 6666666.28482.peg.1221 | Contig_13 | 31049 | 32605 | + | ATPase                                                                                    | FIG01006075 | ff                                                                                                                                                                                                                                                                              |
| fig 6666666.28482.peg.1222 | Contig_13 | 33565 | 32609 | - | Cyclopropane-fatty-acyl-phospholipid synthase (EC 2.1.1.79)                               | FIG00001555 | ff                                                                                                                                                                                                                                                                              |
| fig 6666666.28482.peg.1223 | Contig_13 | 34612 | 33797 | - | Short-chain dehydrogenase/reductase SDR                                                   | FIG00546160 | idu(13);CBSS-164757.7.peg.5020<br>idu(13);Transcription_repair_cluster                                                                                                                                                                                                          |
| fig 6666666.28482.peg.1224 | Contig_13 | 34680 | 35966 | + | Permease of the major facilitator transporter superfamily                                 | FIG01351855 | ff                                                                                                                                                                                                                                                                              |
| fig 6666666.28482.peg.1225 | Contig_13 | 36592 | 35969 | - | POSSIBLE CONSERVED PROLINE RICH MEMBRANE PROTEIN                                          | FIG01329840 | ff                                                                                                                                                                                                                                                                              |
| fig 6666666.28482.peg.1226 | Contig_13 | 37400 | 36825 | - | Transcriptional regulator, TetR family                                                    | FIG00554417 | ff                                                                                                                                                                                                                                                                              |
| fig 6666666.28482.peg.1227 | Contig_13 | 37581 | 39200 | + | Acetoacetyl-CoA synthetase (EC 6.2.1.16) / Long-chain-fatty-acid--CoA ligase (EC 6.2.1.3) | FIG00137255 | idu(72);n-Phenylalkanoic_acid_degradation<br>idu(1);Polyhydroxybutyrate_metabolism<br>idu(1);HMG_CoA_Synthesis<br>idu(72);Fatty_acid_metabolism_cluster<br>idu(72);Biotin_synthesis_cluster<br>idu(72);Biotin_biosynthesis<br>icw(3);Leucine_Degradation_and_HMG-CoA_Metabolism |

|                            |           |       |       |   |                                                                          |             |                                                                                                                                                                                                  |
|----------------------------|-----------|-------|-------|---|--------------------------------------------------------------------------|-------------|--------------------------------------------------------------------------------------------------------------------------------------------------------------------------------------------------|
| fig 6666666.28482.peg.1228 | Contig_13 | 39284 | 40039 | + | Succinyl-CoA:3-ketoacid-coenzyme A transferase subunit A (EC 2.8.3.5)    | FIG00133228 | isu;Protocatechuate_branch_of_beta-ketoadipate_pathway<br>isu;Catechol_branch_of_beta-ketoadipate_pathway icw(1);Serine-glyoxylate_cycle<br>icw(4);Leucine_Degradation_and_HMG-CoA_Metabolism    |
| fig 6666666.28482.peg.1229 | Contig_13 | 40036 | 40686 | + | Succinyl-CoA:3-ketoacid-coenzyme A transferase subunit B (EC 2.8.3.5)    | FIG00133276 | icw(1);Protocatechuate_branch_of_beta-ketoadipate_pathway<br>icw(1);Catechol_branch_of_beta-ketoadipate_pathway isu;Serine-glyoxylate_cycle<br>icw(2);Leucine_Degradation_and_HMG-CoA_Metabolism |
| fig 6666666.28482.peg.1230 | Contig_13 | 40683 | 42269 | + | Methylcrotonyl-CoA carboxylase carboxyl transferase subunit (EC 6.4.1.4) | FIG00138249 | icw(2);Serine-glyoxylate_cycle<br>icw(2);HMG_CoA_Synthesis<br>icw(1);Leucine_Degradation_and_HMG-CoA_Metabolism                                                                                  |
| fig 6666666.28482.peg.1231 | Contig_13 | 42274 | 44244 | + | Methylcrotonyl-CoA carboxylase biotin-containing subunit (EC 6.4.1.4)    | FIG00183535 | icw(3);Serine-glyoxylate_cycle<br>icw(4);HMG_CoA_Synthesis<br>icw(3);Leucine_Degradation_and_HMG-CoA_Metabolism                                                                                  |
| fig 6666666.28482.peg.1232 | Contig_13 | 44241 | 45416 | + | Isovaleryl-CoA dehydrogenase (EC 1.3.99.10)                              | FIG00138712 | icw(2);HMG_CoA_Synthesis<br>icw(6);Leucine_Degradation_and_HMG-CoA_Metabolism                                                                                                                    |
| fig 6666666.28482.peg.1233 | Contig_13 | 45499 | 45993 | + | Oxidase regulatory-related protein                                       | FIG00820637 | ff                                                                                                                                                                                               |
| fig 6666666.28482.peg.1234 | Contig_13 | 45993 | 46814 | + | Hydroxymethylglutaryl-CoA lyase (EC 4.1.3.4)                             | FIG00000963 | idu(2);HMG_CoA_Synthesis<br>idu(2);Leucine_Degradation_and_HMG-CoA_Metabolism                                                                                                                    |

|                            |           |       |       |   |                                                                                                                   |             |                                                                                                                                                       |
|----------------------------|-----------|-------|-------|---|-------------------------------------------------------------------------------------------------------------------|-------------|-------------------------------------------------------------------------------------------------------------------------------------------------------|
| fig 6666666.28482.peg.1235 | Contig_13 | 46943 | 48034 | + | Branched-chain alpha-keto acid dehydrogenase, E1 component, alpha subunit (EC 1.2.4.4)                            | FIG00000964 | isu;Isoleucine_degradation<br>icw(1);Leucine_Degradation_and_HM<br>G-CoA_Metabolism<br>isu;Valine_degradation<br>isu;Dehydrogenase_complexes          |
| fig 6666666.28482.peg.1236 | Contig_13 | 48031 | 49065 | + | Branched-chain alpha-keto acid dehydrogenase, E1 component, beta subunit (EC 1.2.4.4)                             | FIG00055130 | icw(3);Isoleucine_degradation<br>icw(4);Leucine_Degradation_and_HM<br>G-CoA_Metabolism<br>icw(3);Valine_degradation<br>icw(2);Dehydrogenase_complexes |
| fig 6666666.28482.peg.1237 | Contig_13 | 49062 | 50219 | + | Dihydrolipoamide acyltransferase component of branched-chain alpha-keto acid dehydrogenase complex (EC 2.3.1.168) | FIG01304883 | icw(2);Isoleucine_degradation<br>icw(2);Leucine_Degradation_and_HM<br>G-CoA_Metabolism<br>icw(2);Valine_degradation<br>icw(1);Dehydrogenase_complexes |
| fig 6666666.28482.peg.1238 | Contig_13 | 50624 | 50223 | - | hypothetical protein                                                                                              |             |                                                                                                                                                       |
| fig 6666666.28482.peg.1239 | Contig_13 | 51128 | 50949 | - | hypothetical protein                                                                                              |             |                                                                                                                                                       |
| fig 6666666.28482.peg.1240 | Contig_13 | 51127 | 51264 | + | hypothetical protein                                                                                              |             |                                                                                                                                                       |

|                            |           |       |       |   |                                                    |             |                                                                                                                                                                                                                                                                                                                                                 |
|----------------------------|-----------|-------|-------|---|----------------------------------------------------|-------------|-------------------------------------------------------------------------------------------------------------------------------------------------------------------------------------------------------------------------------------------------------------------------------------------------------------------------------------------------|
| fig 6666666.28482.peg.1241 | Contig_13 | 52133 | 51336 | - | Enoyl-CoA hydratase (EC 4.2.1.17)                  | FIG00033206 | idu(51);n-Phenylalkanoic_acid_degradation<br>idu(51);Polyhydroxybutyrate_metabolism<br>icw(1);Isoleucine_degradation<br>idu(51);Fatty_acid_metabolism_cluster<br>idu(51);Lysine_fermentation<br>idu(51);Butanol_Biosynthesis<br>idu(51);Acetyl-CoA_fermentation_to_Butyrate<br>icw(1);Valine_degradation<br>idu(51);Butyrate_metabolism_cluster |
| fig 6666666.28482.peg.1242 | Contig_13 | 52239 | 52487 | + | hypothetical protein                               |             |                                                                                                                                                                                                                                                                                                                                                 |
| fig 6666666.28482.peg.1243 | Contig_13 | 52916 | 52491 | - | FIG00830246: hypothetical protein                  | FIG00830243 | ff                                                                                                                                                                                                                                                                                                                                              |
| fig 6666666.28482.peg.1244 | Contig_13 | 52982 | 53545 | + | Transcriptional regulator, TetR family             | FIG00554417 | ff                                                                                                                                                                                                                                                                                                                                              |
| fig 6666666.28482.peg.1245 | Contig_13 | 53653 | 63327 | + | Long-chain-fatty-acid--CoA ligase (EC 6.2.1.3)     | FIG00018699 | idu(72);n-Phenylalkanoic_acid_degradation<br>idu(72);Fatty_acid_metabolism_cluster<br>idu(72);Biotin_synthesis_cluster<br>idu(72);Biotin_biosynthesis                                                                                                                                                                                           |
| fig 6666666.28482.peg.1246 | Contig_13 | 63636 | 64442 | + | Hydroxyproline-rich glycoprotein DZ-HRGP precursor |             |                                                                                                                                                                                                                                                                                                                                                 |
| fig 6666666.28482.peg.1247 | Contig_13 | 65045 | 64479 | - | serine esterase, cutinase family                   | FIG01349249 | ff                                                                                                                                                                                                                                                                                                                                              |

|                            |           |       |       |   |                                                                                                       |             |                                                                                                                                                                                                                            |
|----------------------------|-----------|-------|-------|---|-------------------------------------------------------------------------------------------------------|-------------|----------------------------------------------------------------------------------------------------------------------------------------------------------------------------------------------------------------------------|
| fig 6666666.28482.peg.1248 | Contig_13 | 65691 | 65260 | - | 14 kDa antigen (16 kDa antigen) (HSP 16.3)                                                            | FIG01320402 | ff                                                                                                                                                                                                                         |
| fig 6666666.28482.peg.1249 | Contig_13 | 66170 | 65868 | - | hypothetical protein                                                                                  |             |                                                                                                                                                                                                                            |
| fig 6666666.28482.peg.1250 | Contig_13 | 66546 | 66373 | - | hypothetical protein                                                                                  |             |                                                                                                                                                                                                                            |
| fig 6666666.28482.peg.1251 | Contig_13 | 66635 | 66751 | + | hypothetical protein                                                                                  |             |                                                                                                                                                                                                                            |
| fig 6666666.28482.peg.1252 | Contig_13 | 66847 | 67155 | + | hypothetical protein                                                                                  |             |                                                                                                                                                                                                                            |
| fig 6666666.28482.rna.19   | Contig_13 | 67252 | 67179 | - | tRNA-Arg-TCT                                                                                          |             |                                                                                                                                                                                                                            |
| fig 6666666.28482.peg.1253 | Contig_13 | 67438 | 68685 | + | Carboxylesterase LipQ                                                                                 | FIG00833775 | ff                                                                                                                                                                                                                         |
| fig 6666666.28482.peg.1254 | Contig_13 | 68927 | 70294 | + | Acyltransferase, ws/dgat/mgat subfamily protein                                                       | FIG01331760 | ff                                                                                                                                                                                                                         |
| fig 6666666.28482.peg.1255 | Contig_13 | 70291 | 72066 | + | Phosphoserine phosphatase (EC 3.1.3.3) / 1-acyl-sn-glycerol-3-phosphate acyltransferase (EC 2.3.1.51) | FIG00135282 | idu(6);Glycerolipid_and_Glycerophospholipid_Metabolism_in_Bacteria<br>idu(3);CBSS-336982.3.peg.3874<br>idu(6);Ribosome_post-transcriptional_modification_and_chromosomal_segregation_cluster<br>idu(3);Serine_Biosynthesis |
| fig 6666666.28482.peg.1256 | Contig_13 | 72063 | 74432 | + | Glycerol-3-phosphate acyltransferase (EC 2.3.1.15)                                                    | FIG00001327 | icw(1);Glycerolipid_and_Glycerophospholipid_Metabolism_in_Bacteria                                                                                                                                                         |
| fig 6666666.28482.peg.1257 | Contig_13 | 74459 | 76492 | + | Copper resistance protein D                                                                           | FIG00001556 | isu;Copper_homeostasis                                                                                                                                                                                                     |
| fig 6666666.28482.peg.1258 | Contig_13 | 76690 | 76574 | - | YoeB toxin protein                                                                                    | FIG00006169 | ff                                                                                                                                                                                                                         |
| fig 6666666.28482.peg.1259 | Contig_13 | 78777 | 76891 | - | hypothetical protein                                                                                  | FIG00638284 | ff                                                                                                                                                                                                                         |
| fig 6666666.28482.peg.1260 | Contig_13 | 78784 | 78993 | + | hypothetical protein                                                                                  |             |                                                                                                                                                                                                                            |
| fig 6666666.28482.peg.1261 | Contig_13 | 79513 | 79995 | + | Single-strand DNA binding protein                                                                     | FIG00820266 | ff                                                                                                                                                                                                                         |
| fig 6666666.28482.peg.1262 | Contig_13 | 80076 | 81752 | + | ABC transporter ATP-binding protein                                                                   | FIG01956052 | ff                                                                                                                                                                                                                         |

|                            |           |       |       |   |                                                                               |             |                                                                                                 |
|----------------------------|-----------|-------|-------|---|-------------------------------------------------------------------------------|-------------|-------------------------------------------------------------------------------------------------|
| fig 6666666.28482.peg.1263 | Contig_13 | 81828 | 86699 | + | NAD-specific glutamate dehydrogenase (EC 1.4.1.2), large form                 | FIG00003209 | isu;Glutamate_dehydrogenases<br>isu;Glutamine,_Glutamate,_Aspartate_and_Asparagine_Biosynthesis |
| fig 6666666.28482.peg.1264 | Contig_13 | 86747 | 87112 | + | FIG00995656:<br>hypothetical protein                                          | FIG00823158 | ff                                                                                              |
| fig 6666666.28482.peg.1265 | Contig_13 | 87133 | 87771 | + | FIG01001213:<br>hypothetical protein                                          | FIG00820498 | ff                                                                                              |
| fig 6666666.28482.peg.1266 | Contig_13 | 89354 | 87786 | - | Alpha-glucosidase (EC 3.2.1.20)                                               | FIG00745599 | isu;Maltose_and_Maltodextrin_Utilization<br>isu;D-Galacturonate_and_D-Glucuronate_Utilization   |
| fig 6666666.28482.peg.1267 | Contig_13 | 89776 | 89378 | - | Hemoglobin-like protein HbO                                                   | FIG00001245 | isu;Bacterial_hemoglobins                                                                       |
| fig 6666666.28482.peg.1268 | Contig_13 | 90057 | 90557 | + | HNH endonuclease family protein                                               | FIG00017582 | ff                                                                                              |
| fig 6666666.28482.peg.1269 | Contig_13 | 90613 | 90849 | + | FIG00821364:<br>hypothetical protein                                          | FIG00821363 | ff                                                                                              |
| fig 6666666.28482.peg.1270 | Contig_13 | 90836 | 91303 | + | FIG00997368:<br>hypothetical protein                                          | FIG00820011 | ff                                                                                              |
| fig 6666666.28482.peg.1271 | Contig_13 | 93973 | 91391 | - | Membrane alanine aminopeptidase N (EC 3.4.11.2)                               | FIG00000714 | isu;Aminopeptidases_(EC_3.4.11.-)                                                               |
| fig 6666666.28482.peg.1272 | Contig_13 | 94102 | 94725 | + | FIG00820885:<br>hypothetical protein                                          | FIG00820884 | ff                                                                                              |
| fig 6666666.28482.peg.1273 | Contig_13 | 94763 | 95251 | + | Ribose 5-phosphate isomerase B (EC 5.3.1.6) / Galactose 6-phosphate isomerase | FIG00135914 | isu;D-ribose_utilization<br>isu;Pentose_phosphate_pathway                                       |
| fig 6666666.28482.peg.1274 | Contig_13 | 95255 | 96061 | + | Formamidopyrimidine-DNA glycosylase (EC 3.2.2.23)                             | FIG00035634 | idu(3);DNA_Repair_Base_Excision                                                                 |

|                            |           |        |        |   |                                                                     |             |                                                                                        |
|----------------------------|-----------|--------|--------|---|---------------------------------------------------------------------|-------------|----------------------------------------------------------------------------------------|
| fig 6666666.28482.peg.1275 | Contig_13 | 96150  | 96425  | + | conserved hypothetical<br>secreted protein                          |             |                                                                                        |
| fig 6666666.28482.peg.1276 | Contig_13 | 97672  | 96479  | - | Esterase A                                                          | FIG01314929 | ff                                                                                     |
| fig 6666666.28482.rna.20   | Contig_13 | 97774  | 97704  | - | tRNA-Gly-TCC                                                        |             |                                                                                        |
| fig 6666666.28482.rna.21   | Contig_13 | 97931  | 98004  | + | tRNA-Pro-TGG                                                        |             |                                                                                        |
| fig 6666666.28482.peg.1277 | Contig_13 | 98046  | 99488  | + | Cell division trigger factor<br>(EC 5.2.1.8)                        | FIG00000286 | isu;Bacterial_Cell_Division                                                            |
| fig 6666666.28482.peg.1278 | Contig_13 | 99607  | 100206 | + | ATP-dependent Clp<br>protease proteolytic<br>subunit (EC 3.4.21.92) | FIG00000028 | icw(2);Proteolysis_in_bacteria,_ATP-<br>dependent<br>icw(1);cAMP_signaling_in_bacteria |
| fig 6666666.28482.peg.1279 | Contig_13 | 100203 | 100838 | + | ATP-dependent Clp<br>protease proteolytic<br>subunit (EC 3.4.21.92) | FIG00000028 | icw(2);Proteolysis_in_bacteria,_ATP-<br>dependent<br>icw(1);cAMP_signaling_in_bacteria |
| fig 6666666.28482.peg.1280 | Contig_13 | 101753 | 100893 | - | Homocysteine S-<br>methyltransferase (EC<br>2.1.1.10)               | FIG00002804 | isu;S-methylmethionine                                                                 |
| fig 6666666.28482.peg.1281 | Contig_13 | 101926 | 101747 | - | hypothetical protein                                                |             |                                                                                        |
| fig 6666666.28482.peg.1282 | Contig_13 | 102047 | 103327 | + | ATP-dependent Clp<br>protease ATP-binding<br>subunit ClpX           | FIG00000241 | isu;Proteolysis_in_bacteria,_ATP-<br>dependent                                         |
| fig 6666666.28482.peg.1283 | Contig_13 | 103358 | 104596 | + | Integral membrane<br>transport protein                              | FIG00820204 | ff                                                                                     |
| fig 6666666.28482.peg.1284 | Contig_13 | 104950 | 106791 | + | 2-oxoglutarate<br>oxidoreductase, alpha<br>subunit (EC 1.2.7.3)     | FIG00937303 | ff                                                                                     |
| fig 6666666.28482.peg.1285 | Contig_13 | 106788 | 107888 | + | 2-oxoglutarate<br>oxidoreductase, beta<br>subunit (EC 1.2.7.3)      | FIG00049580 | ff                                                                                     |

|                            |            |        |        |   |                                                                                               |             |                                                                                                       |
|----------------------------|------------|--------|--------|---|-----------------------------------------------------------------------------------------------|-------------|-------------------------------------------------------------------------------------------------------|
| fig 6666666.28482.peg.1286 | Contig_13  | 107959 | 108495 | + | Molybdopterin-guanine dinucleotide biosynthesis protein MobA                                  | FIG00000902 | isu;ar-431-EC_Molybdopterin-guanine_dinucleotide_biosynthesis<br>isu;Molybdenum_cofactor_biosynthesis |
| fig 6666666.28482.peg.1287 | Contig_130 | 1555   | 2427   | + | Non functional Dihydropteroate synthase 2                                                     | FIG00018087 | ff                                                                                                    |
| fig 6666666.28482.peg.1288 | Contig_130 | 2424   | 3380   | + | Glycosyltransferases involved in cell wall biogenesis                                         | FIG01313034 | ff                                                                                                    |
| fig 6666666.28482.peg.1289 | Contig_130 | 3419   | 3760   | + | FIG01000442: hypothetical protein                                                             | FIG00820927 | ff                                                                                                    |
| fig 6666666.28482.peg.1290 | Contig_130 | 3757   | 4323   | + | DNA-3-methyladenine glycosylase (EC 3.2.2.20)                                                 | FIG00000673 | isu;DNA_Repair_Base_Excision<br>isu;CBSS-326442.4.peg.1852                                            |
| fig 6666666.28482.peg.1291 | Contig_130 | 4510   | 4677   | + | hypothetical protein                                                                          | FIG00638284 | ff                                                                                                    |
| fig 6666666.28482.peg.1292 | Contig_130 | 5848   | 4685   | - | Predicted glycogen synthase, ADP-glucose transglucosylase (EC 2.4.1.21), Actinobacterial type | FIG00139522 | isu;Glycogen_metabolism                                                                               |
| fig 6666666.28482.peg.1293 | Contig_130 | 6022   | 7218   | + | Glucose-1-phosphate adenyltransferase (EC 2.7.7.27)                                           | FIG00000717 | icw(1);Glycogen_metabolism                                                                            |
| fig 6666666.28482.peg.1294 | Contig_130 | 8981   | 7299   | - | Cocaine esterase (EC 3.1.1.-)                                                                 | FIG01350540 | ff                                                                                                    |
| fig 6666666.28482.peg.1295 | Contig_130 | 9674   | 9000   | - | isoprenylcysteine carboxyl methyltransferase (icmt) family protein                            |             |                                                                                                       |

|                            |            |       |       |   |                                                                                            |             |                                                                                                      |
|----------------------------|------------|-------|-------|---|--------------------------------------------------------------------------------------------|-------------|------------------------------------------------------------------------------------------------------|
| fig 6666666.28482.peg.1296 | Contig_130 | 11331 | 9688  | - | PROBABLE TETRONASIN-<br>TRANSPORT INTEGRAL<br>MEMBRANE PROTEIN<br>ABC TRANSPORTER          | FIG00996565 | ff                                                                                                   |
| fig 6666666.28482.peg.1297 | Contig_130 | 12248 | 11328 | - | ABC-type multidrug<br>transport system, ATPase<br>component                                | FIG00001005 | idu(1);CBSS-196164.1.peg.1690                                                                        |
| fig 6666666.28482.peg.1298 | Contig_130 | 12876 | 12238 | - | Transcriptional regulator,<br>TetR family                                                  | FIG00554417 | ff                                                                                                   |
| fig 6666666.28482.peg.1299 | Contig_130 | 13625 | 12957 | - | O-methyltransferase                                                                        | FIG00821228 | ff                                                                                                   |
| fig 6666666.28482.peg.1300 | Contig_130 | 13828 | 14610 | + | RNA polymerase sigma-<br>70 factor, ECF subfamily                                          | FIG00952839 | ff                                                                                                   |
| fig 6666666.28482.peg.1301 | Contig_130 | 15458 | 14676 | - | FIG025093: Probable<br>membrane protein                                                    | FIG01306444 | idu(2);Mycobacterium_virulence_ope<br>ron_involved_in_protein_synthesis_(<br>SSU_ribosomal_proteins) |
| fig 6666666.28482.peg.1302 | Contig_130 | 18373 | 15731 | - | hypothetical protein                                                                       | FIG00638284 | ff                                                                                                   |
| fig 6666666.28482.peg.1303 | Contig_130 | 18945 | 18775 | - | hypothetical protein                                                                       |             |                                                                                                      |
| fig 6666666.28482.peg.1304 | Contig_131 | 170   | 1018  | + | Signal recognition<br>particle receptor protein<br>FtsY (=alpha subunit) (TC<br>3.A.5.1.1) | FIG00000095 | isu;Bacterial_signal_recognition_parti<br>cle_(SRP) isu;Bacterial_Cell_Division                      |
| fig 6666666.28482.peg.1305 | Contig_131 | 1158  | 2588  | + | Ammonium transporter                                                                       | FIG00004764 | icw(1);Ammonia_assimilation                                                                          |
| fig 6666666.28482.peg.1306 | Contig_131 | 2585  | 2923  | + | Nitrogen regulatory<br>protein P-II                                                        | FIG00005111 | idu(1);Ammonia_assimilation                                                                          |
| fig 6666666.28482.peg.1307 | Contig_131 | 3083  | 5413  | + | [Protein-P-II]<br>uridylyltransferase (EC<br>2.7.7.59)                                     | FIG00002864 | icw(2);Ammonia_assimilation<br>isu;CBSS-312309.3.peg.1965                                            |
| fig 6666666.28482.peg.1308 | Contig_131 | 5838  | 5644  | - | hypothetical protein                                                                       |             |                                                                                                      |

|                            |            |      |      |   |                                                                                              |             |                                                                                   |
|----------------------------|------------|------|------|---|----------------------------------------------------------------------------------------------|-------------|-----------------------------------------------------------------------------------|
| fig 6666666.28482.peg.1309 | Contig_132 | 36   | 602  | + | Protoporphyrinogen IX oxidase, aerobic, HemY (EC 1.3.3.4)                                    | FIG00068302 | icw(1);Heme_and_Siroheme_Biosynt<br>hesis                                         |
| fig 6666666.28482.peg.1310 | Contig_132 | 608  | 1303 | + | Hemoprotein HemQ, essential component of heme biosynthetic pathway in Gram-positive bacteria | FIG00003629 | isu;Heme_and_Siroheme_Biosynthesi<br>s                                            |
| fig 6666666.28482.peg.1311 | Contig_132 | 1325 | 2074 | + | Methyltransferase (EC 2.1.1.-) colocalized with Q                                            | FIG00026000 | ff                                                                                |
| fig 6666666.28482.peg.1312 | Contig_132 | 3420 | 2071 | - | FIG00821608:<br>hypothetical protein                                                         | FIG00821607 | ff                                                                                |
| fig 6666666.28482.peg.1313 | Contig_133 | 134  | 15   | - | hypothetical protein                                                                         |             |                                                                                   |
| fig 6666666.28482.peg.1314 | Contig_133 | 342  | 1550 | + | PPE family protein                                                                           | FIG00013075 | idu(57);CBSS-164757.7.peg.5020                                                    |
| fig 6666666.28482.peg.1315 | Contig_133 | 2082 | 2342 | + | hypothetical protein                                                                         |             |                                                                                   |
| fig 6666666.28482.peg.1316 | Contig_133 | 2450 | 2746 | + | FIG00824639:<br>hypothetical protein                                                         | FIG00823510 | ff                                                                                |
| fig 6666666.28482.peg.1317 | Contig_134 | 4    | 1023 | + | PPE family protein                                                                           | FIG00013075 | idu(57);CBSS-164757.7.peg.5020                                                    |
| fig 6666666.28482.peg.1318 | Contig_134 | 1123 | 1404 | + | FIG00824639:<br>hypothetical protein                                                         | FIG00823510 | ff                                                                                |
| fig 6666666.28482.peg.1319 | Contig_135 | 3187 | 875  | - | ATP-dependent helicase                                                                       | FIG00995938 | ff                                                                                |
| fig 6666666.28482.peg.1320 | Contig_135 | 3460 | 3663 | + | Cold shock protein CspA                                                                      | FIG00004100 | idu(1);Cold_shock,_CspA_family_of_p<br>roteins                                    |
| fig 6666666.28482.peg.1321 | Contig_135 | 3789 | 4388 | + | FIG00995018:<br>hypothetical protein                                                         | FIG00820764 | ff                                                                                |
| fig 6666666.28482.peg.1322 | Contig_135 | 4584 | 7373 | + | DNA topoisomerase I (EC 5.99.1.2)                                                            | FIG00000204 | isu;CBSS-272943.3.peg.1367<br>isu;DNA_topoisomerases,_Type_I,_A<br>TP-independent |
| fig 6666666.28482.peg.1323 | Contig_135 | 8974 | 7370 | - | Adenylate cyclase (EC 4.6.1.1)                                                               | FIG00001294 | idu(25);cAMP_signaling_in_bacteria                                                |
| fig 6666666.28482.peg.1324 | Contig_135 | 9059 | 9211 | + | hypothetical protein                                                                         |             |                                                                                   |

|                            |            |       |       |   |                                                                                                        |             |                                                                                                                                                                                                                                        |
|----------------------------|------------|-------|-------|---|--------------------------------------------------------------------------------------------------------|-------------|----------------------------------------------------------------------------------------------------------------------------------------------------------------------------------------------------------------------------------------|
| fig 6666666.28482.peg.1325 | Contig_135 | 9171  | 10346 | + | DNA polymerase III delta prime subunit (EC 2.7.7.7)                                                    | FIG00057709 | isu;DNA-replication                                                                                                                                                                                                                    |
| fig 6666666.28482.ma.22    | Contig_135 | 10407 | 10479 | + | tRNA-Thr-CGT                                                                                           |             |                                                                                                                                                                                                                                        |
| fig 6666666.28482.peg.1326 | Contig_135 | 10891 | 11133 | + | hypothetical protein                                                                                   |             |                                                                                                                                                                                                                                        |
| fig 6666666.28482.peg.1327 | Contig_135 | 13015 | 11246 | - | PROBABLE CONSERVED TRANSMEMBRANE PROTEIN                                                               | FIG00662132 | ff                                                                                                                                                                                                                                     |
| fig 6666666.28482.peg.1328 | Contig_135 | 13053 | 13997 | + | UDP-glucose 4-epimerase (EC 5.1.3.2)                                                                   | FIG00022300 | idu(4);Rhamnose_containing_glycans<br>idu(4);Lactose_and_Galactose_Uptake_and_Utilization<br>idu(4);N-linked_Glycosylation_in_Bacteria<br>idu(4);Lacto-N-Biose_I_and_Galacto-N-Biose_Metabolic_Pathway                                 |
| fig 6666666.28482.peg.1329 | Contig_135 | 14563 | 14213 | - | Cell division protein DivIC (FtsB), stabilizes FtsL against RasP cleavage                              | FIG00485194 | idu(10);Possible_new_toxin-antitoxin_system_including_DivIC<br>idu(10);Bacterial_Cell_Division<br>idu(10);Cell_division-ribosomal_stress_proteins_cluster<br>idu(10);Bacterial_Cytoskeleton<br>idu(10);Stationary_phase_repair_cluster |
| fig 6666666.28482.peg.1330 | Contig_135 | 15255 | 14560 | - | Dolichol-phosphate mannosyltransferase (EC 2.4.1.83) in lipid-linked oligosaccharide synthesis cluster | FIG00543846 | idu(1);Lipid-linked_oligosaccharide_synthesis_related_cluster                                                                                                                                                                          |
| fig 6666666.28482.peg.1331 | Contig_135 | 16560 | 15280 | - | hypothetical protein                                                                                   | FIG00638284 | ff                                                                                                                                                                                                                                     |

|                            |            |       |       |   |                                                             |             |                                                                                                                                                 |
|----------------------------|------------|-------|-------|---|-------------------------------------------------------------|-------------|-------------------------------------------------------------------------------------------------------------------------------------------------|
| fig 6666666.28482.peg.1332 | Contig_135 | 16645 | 17733 | + | Integral membrane protein                                   | FIG01956050 | ff                                                                                                                                              |
| fig 6666666.28482.peg.1333 | Contig_135 | 18431 | 17730 | - | Putative uncharacterized protein BCG_1787                   | FIG00831112 | ff                                                                                                                                              |
| fig 6666666.28482.peg.1334 | Contig_135 | 18976 | 18479 | - | Inorganic pyrophosphatase (EC 3.6.1.1)                      | FIG00000429 | isu;Phosphate_metabolism                                                                                                                        |
| fig 6666666.28482.peg.1335 | Contig_135 | 19125 | 20477 | + | D-alanyl-D-alanine carboxypeptidase (EC 3.4.16.4)           | FIG00561498 | idu(3);Murein_Hydrolases<br>idu(3);CBSS-84588.1.peg.1247<br>idu(3);Metallocoarboxypeptidases_(EC_3.4.17.-)<br>idu(3);Peptidoglycan_Biosynthesis |
| fig 6666666.28482.peg.1336 | Contig_135 | 20468 | 21535 | + | hypothetical protein                                        | FIG00821505 | ff                                                                                                                                              |
| fig 6666666.28482.peg.1337 | Contig_135 | 21514 | 22473 | + | tRNA(Ile)-lysine synthetase                                 | FIG00000257 | isu;tRNA_processing isu;Cell_division-ribosomal_stress_proteins_cluster                                                                         |
| fig 6666666.28482.peg.1338 | Contig_135 | 22517 | 23128 | + | Hypoxanthine-guanine phosphoribosyltransferase (EC 2.4.2.8) | FIG00000355 | isu;Purine_conversions<br>icw(1);Cell_division-ribosomal_stress_proteins_cluster                                                                |
| fig 6666666.28482.peg.1339 | Contig_135 | 23927 | 23217 | - | Lipoprotein LpqG                                            | FIG01334576 | ff                                                                                                                                              |
| fig 6666666.28482.peg.1340 | Contig_135 | 24223 | 24522 | + | PE family protein                                           | FIG01311212 | ff                                                                                                                                              |

|                            |            |      |      |   |                                                                                                                                                                    |             |                                                                                                                                                       |
|----------------------------|------------|------|------|---|--------------------------------------------------------------------------------------------------------------------------------------------------------------------|-------------|-------------------------------------------------------------------------------------------------------------------------------------------------------|
| fig 6666666.28482.peg.1341 | Contig_136 | 3504 | 160  | - | Dihydrolipoamide succinyltransferase component (E2) of 2-oxoglutarate dehydrogenase complex (EC 2.3.1.61) / 2-oxoglutarate dehydrogenase E1 component (EC 1.2.4.2) | FIG00004392 | isu;TCA_Cycle<br>isu;TCA_Cycle<br>isu;Dehydrogenase_complexes<br>isu;Dehydrogenase_complexes                                                          |
| fig 6666666.28482.peg.1342 | Contig_137 | 1149 | 436  | - | hypothetical protein                                                                                                                                               |             |                                                                                                                                                       |
| fig 6666666.28482.peg.1343 | Contig_137 | 2598 | 1165 | - | Long-chain-fatty-acid--CoA ligase (EC 6.2.1.3)                                                                                                                     | FIG00018699 | idu(72);n-Phenylalkanoic_acid_degradation<br>idu(72);Fatty_acid_metabolism_cluster<br>idu(72);Biotin_synthesis_cluster<br>idu(72);Biotin_biosynthesis |
| fig 6666666.28482.peg.1344 | Contig_137 | 3306 | 2608 | - | hypothetical protein                                                                                                                                               | FIG00638284 | ff                                                                                                                                                    |
| fig 6666666.28482.peg.1345 | Contig_137 | 3497 | 3979 | + | hypothetical protein                                                                                                                                               |             |                                                                                                                                                       |
| fig 6666666.28482.peg.1346 | Contig_137 | 3999 | 4628 | + | nitroreductase                                                                                                                                                     | FIG01123116 | ff                                                                                                                                                    |
| fig 6666666.28482.peg.1347 | Contig_137 | 4628 | 5122 | + | FIG00822669:<br>hypothetical protein                                                                                                                               | FIG00822668 | ff                                                                                                                                                    |
| fig 6666666.28482.peg.1348 | Contig_137 | 5812 | 6495 | + | Transcriptional regulator, FUR family                                                                                                                              | FIG00002441 | idu(2);Oxidative_stress                                                                                                                               |
| fig 6666666.28482.peg.1349 | Contig_137 | 6548 | 7042 | + | FIG00823749:<br>hypothetical protein                                                                                                                               | FIG00823745 | ff                                                                                                                                                    |
| fig 6666666.28482.peg.1350 | Contig_137 | 7059 | 8039 | + | D-amino-acid oxidase (EC 1.4.3.3)                                                                                                                                  | FIG00002178 | isu;Proline,_4-hydroxyproline_uptake_and_utilization                                                                                                  |

|                            |            |       |       |   |                                                                                        |             |                                                                                                                                                                                                                                                                                                                                                   |
|----------------------------|------------|-------|-------|---|----------------------------------------------------------------------------------------|-------------|---------------------------------------------------------------------------------------------------------------------------------------------------------------------------------------------------------------------------------------------------------------------------------------------------------------------------------------------------|
| fig 6666666.28482.peg.1351 | Contig_137 | 8036  | 8818  | + | Enoyl-CoA hydratase (EC 4.2.1.17)                                                      | FIG00033206 | idu(51);n-Phenylalkanoic_acid_degradation<br>idu(51);Polyhydroxybutyrate_metabolism<br>idu(51);Isoleucine_degradation<br>idu(51);Fatty_acid_metabolism_cluster<br>idu(51);Lysine_fermentation<br>idu(51);Butanol_Biosynthesis<br>idu(51);Acetyl-CoA_fermentation_to_Butyrate<br>idu(51);Valine_degradation<br>idu(51);Butyrate_metabolism_cluster |
| fig 6666666.28482.peg.1352 | Contig_137 | 9225  | 8833  | - | Possible membrane protein                                                              | FIG01121868 | ff                                                                                                                                                                                                                                                                                                                                                |
| fig 6666666.28482.peg.1353 | Contig_137 | 10322 | 9255  | - | hypothetical protein                                                                   | FIG00638284 | ff                                                                                                                                                                                                                                                                                                                                                |
| fig 6666666.28482.peg.1354 | Contig_137 | 10376 | 11650 | + | Sialic acid-transport integral membrane protein NanT                                   | FIG01308258 | ff                                                                                                                                                                                                                                                                                                                                                |
| fig 6666666.28482.peg.1355 | Contig_137 | 12942 | 11653 | - | Molybdopterin binding motif, CinA N-terminal domain / C-terminal domain of CinA type S | FIG01304044 | isu;NAD_and_NADP_cofactor_biosynthesis_global<br>isu;Riboflavin_synthesis_cluster                                                                                                                                                                                                                                                                 |
| fig 6666666.28482.peg.1356 | Contig_137 | 12997 | 14373 | + | lignin peroxidase LipJ                                                                 |             |                                                                                                                                                                                                                                                                                                                                                   |
| fig 6666666.28482.peg.1357 | Contig_137 | 14391 | 14957 | + | Lipoprotein LppD                                                                       | FIG01314811 | ff                                                                                                                                                                                                                                                                                                                                                |
| fig 6666666.28482.peg.1358 | Contig_137 | 15259 | 14954 | - | ExtraCellular Mutant; Ecm15p                                                           | FIG01312625 | ff                                                                                                                                                                                                                                                                                                                                                |
| fig 6666666.28482.peg.1359 | Contig_137 | 15311 | 15742 | + | D-tyrosyl-tRNA(Tyr) deacylase                                                          | FIG00000473 | isu;D-tyrosyl-tRNA(Tyr)_deacylase<br>isu;CBSS-342610.3.peg.283                                                                                                                                                                                                                                                                                    |

|                            |            |       |       |   |                                                                 |             |                              |
|----------------------------|------------|-------|-------|---|-----------------------------------------------------------------|-------------|------------------------------|
| fig 6666666.28482.peg.1360 | Contig_137 | 15790 | 16707 | + | Putative S-adenosyl-L-methionine-dependent methyltransferase    | FIG01342021 | ff                           |
| fig 6666666.28482.peg.1361 | Contig_137 | 17740 | 16715 | - | Threonine dehydrogenase and related Zn-dependent dehydrogenases | FIG01292486 | idu(2);Threonine_degradation |
| fig 6666666.28482.peg.1362 | Contig_137 | 19709 | 17769 | - | Probable monooxygenase Y4ID (EC 1.14.13.-)                      | FIG01394124 | ff                           |
| fig 6666666.28482.peg.1363 | Contig_138 | 2559  | 34    | - | putative transporter permease                                   | FIG01600014 | ff                           |
| fig 6666666.28482.peg.1364 | Contig_138 | 3269  | 2556  | - | putative ABC transporter ATP-binding protein                    | FIG00995347 | ff                           |
| fig 6666666.28482.peg.1365 | Contig_138 | 3439  | 4224  | + | FIG00825647: hypothetical protein                               | FIG00825646 | ff                           |
| fig 6666666.28482.peg.1366 | Contig_138 | 4224  | 4595  | + | FIG00820067: hypothetical protein                               | FIG00820065 | ff                           |
| fig 6666666.28482.peg.1367 | Contig_138 | 4666  | 5313  | + | FIG00815605: hypothetical protein                               | FIG00815604 | ff                           |
| fig 6666666.28482.peg.1368 | Contig_138 | 5776  | 5321  | - | hypothetical protein                                            |             |                              |
| fig 6666666.28482.peg.1369 | Contig_138 | 5909  | 7657  | + | Amidohydrolase 3                                                |             |                              |
| fig 6666666.28482.peg.1370 | Contig_138 | 8385  | 7654  | - | Cutinase Cut1                                                   | FIG00826187 | ff                           |
| fig 6666666.28482.peg.1371 | Contig_138 | 8981  | 8505  | - | FIG00832781: hypothetical protein                               | FIG00821740 | ff                           |
| fig 6666666.28482.peg.1372 | Contig_138 | 9728  | 9063  | - | Transcriptional regulator, TetR family                          | FIG00554417 | ff                           |
| fig 6666666.28482.peg.1373 | Contig_138 | 10369 | 9782  | - | FIG00824313: hypothetical protein                               | FIG00824312 | ff                           |
| fig 6666666.28482.peg.1374 | Contig_138 | 10412 | 10957 | + | FIG00821471: hypothetical protein                               | FIG00821470 | ff                           |

|                            |            |       |       |   |                                                |             |                                                                                                                                                                                                                                                                                                                         |
|----------------------------|------------|-------|-------|---|------------------------------------------------|-------------|-------------------------------------------------------------------------------------------------------------------------------------------------------------------------------------------------------------------------------------------------------------------------------------------------------------------------|
| fig 6666666.28482.peg.1375 | Contig_138 | 11066 | 11917 | + | Enoyl-CoA hydratase (EC 4.2.1.17)              | FIG00033206 | icw(1);n-Phenylalkanoic_acid_degradation idu(51);Polyhydroxybutyrate_metabolism idu(51);Isoleucine_degradation icw(1);Fatty_acid_metabolism_cluster idu(51);Lysine_fermentation idu(51);Butanol_Biosynthesis idu(51);Acetyl-CoA_fermentation_to_Butyrate idu(51);Valine_degradation idu(51);Butyrate_metabolism_cluster |
| fig 6666666.28482.peg.1376 | Contig_138 | 13669 | 11969 | - | FIG00824882: hypothetical protein              | FIG00824878 | ff                                                                                                                                                                                                                                                                                                                      |
| fig 6666666.28482.peg.1377 | Contig_138 | 15039 | 13666 | - | FIG00822601: hypothetical protein              | FIG00822600 | ff                                                                                                                                                                                                                                                                                                                      |
| fig 6666666.28482.peg.1378 | Contig_138 | 16589 | 15054 | - | Long-chain-fatty-acid--CoA ligase (EC 6.2.1.3) | FIG00018699 | idu(72);n-Phenylalkanoic_acid_degradation idu(72);Fatty_acid_metabolism_cluster idu(72);Biotin_synthesis_cluster idu(72);Biotin_biosynthesis                                                                                                                                                                            |

|                            |            |       |       |   |                                                               |             |                                                                                                                                                                                                                                                                                                                         |
|----------------------------|------------|-------|-------|---|---------------------------------------------------------------|-------------|-------------------------------------------------------------------------------------------------------------------------------------------------------------------------------------------------------------------------------------------------------------------------------------------------------------------------|
| fig 6666666.28482.peg.1379 | Contig_138 | 17469 | 16597 | - | Enoyl-CoA hydratase (EC 4.2.1.17)                             | FIG00033206 | icw(1);n-Phenylalkanoic_acid_degradation idu(51);Polyhydroxybutyrate_metabolism idu(51);Isoleucine_degradation icw(1);Fatty_acid_metabolism_cluster idu(51);Lysine_fermentation idu(51);Butanol_Biosynthesis idu(51);Acetyl-CoA_fermentation_to_Butyrate idu(51);Valine_degradation idu(51);Butyrate_metabolism_cluster |
| fig 6666666.28482.peg.1380 | Contig_138 | 17720 | 17484 | - | hypothetical                                                  | FIG01337044 | ff                                                                                                                                                                                                                                                                                                                      |
| fig 6666666.28482.peg.1381 | Contig_138 | 18711 | 17713 | - | Acetoin dehydrogenase E1 component beta-subunit (EC 1.2.4.-)  | FIG01270039 | idu(1);Acetoin,_butanediol_metabolism idu(1);Dehydrogenase_complexes                                                                                                                                                                                                                                                    |
| fig 6666666.28482.peg.1382 | Contig_138 | 19705 | 18716 | - | Acetoin dehydrogenase E1 component alpha-subunit (EC 1.2.4.-) | FIG00138523 | icw(1);Acetoin,_butanediol_metabolism icw(1);Dehydrogenase_complexes                                                                                                                                                                                                                                                    |
| fig 6666666.28482.peg.1383 | Contig_138 | 20606 | 19740 | - | FIG00820090: hypothetical protein                             | FIG00820089 | ff                                                                                                                                                                                                                                                                                                                      |
| fig 6666666.28482.peg.1384 | Contig_138 | 20854 | 22047 | + | FIG00824352: hypothetical protein                             | FIG00824349 | ff                                                                                                                                                                                                                                                                                                                      |
| fig 6666666.28482.peg.1385 | Contig_138 | 22209 | 22096 | - | hypothetical protein                                          |             |                                                                                                                                                                                                                                                                                                                         |
| fig 6666666.28482.peg.1386 | Contig_138 | 22307 | 22576 | + | hypothetical protein                                          |             |                                                                                                                                                                                                                                                                                                                         |
| fig 6666666.28482.peg.1387 | Contig_138 | 22608 | 23027 | + | protein of unknown function DUF302                            |             |                                                                                                                                                                                                                                                                                                                         |

|                            |            |       |       |   |                                                                                   |             |                                                                    |
|----------------------------|------------|-------|-------|---|-----------------------------------------------------------------------------------|-------------|--------------------------------------------------------------------|
| fig 6666666.28482.peg.1388 | Contig_138 | 23034 | 23393 | + | Possible<br>carboxymuconolactone<br>decarboxylase family<br>protein (EC 4.1.1.44) | FIG01384312 | ff                                                                 |
| fig 6666666.28482.peg.1389 | Contig_138 | 23512 | 24876 | + | Diacylglycerol O-<br>acyltransferase (EC<br>2.3.1.20)                             | FIG01394190 | ff                                                                 |
| fig 6666666.28482.peg.1390 | Contig_138 | 25071 | 25337 | + | FIG00828553:<br>hypothetical protein                                              | FIG00828551 | ff                                                                 |
| fig 6666666.28482.peg.1391 | Contig_138 | 26134 | 25409 | - | Transcriptional regulator,<br>IcIR family                                         | FIG00022569 | idu(12);Homogentisate_pathway_of_<br>aromatic_compound_degradation |
| fig 6666666.28482.peg.1392 | Contig_138 | 26232 | 27572 | + | oxidoreductase, FAD-<br>binding                                                   | FIG01339311 | ff                                                                 |
| fig 6666666.28482.peg.1393 | Contig_138 | 27572 | 28366 | + | FIG00820194:<br>hypothetical protein                                              | FIG00820191 | ff                                                                 |
| fig 6666666.28482.peg.1394 | Contig_138 | 28598 | 28446 | - | FIG00821218:<br>hypothetical protein                                              | FIG00821215 | ff                                                                 |
| fig 6666666.28482.peg.1395 | Contig_139 | 1613  | 528   | - | Uroporphyrinogen III<br>decarboxylase (EC<br>4.1.1.37)                            | FIG00000428 | isu;Heme_and_Siroheme_Biosynthesi<br>s                             |

|                            |            |      |      |   |                                               |             |                                                                                                                                                                                                                                                                                                                                                   |
|----------------------------|------------|------|------|---|-----------------------------------------------|-------------|---------------------------------------------------------------------------------------------------------------------------------------------------------------------------------------------------------------------------------------------------------------------------------------------------------------------------------------------------|
| fig 6666666.28482.peg.1396 | Contig_139 | 1671 | 2474 | + | Enoyl-CoA hydratase (EC 4.2.1.17)             | FIG00033206 | idu(51);n-Phenylalkanoic_acid_degradation<br>idu(51);Polyhydroxybutyrate_metabolism<br>idu(51);Isoleucine_degradation<br>idu(51);Fatty_acid_metabolism_cluster<br>idu(51);Lysine_fermentation<br>idu(51);Butanol_Biosynthesis<br>idu(51);Acetyl-CoA_fermentation_to_Butyrate<br>idu(51);Valine_degradation<br>idu(51);Butyrate_metabolism_cluster |
| fig 6666666.28482.peg.1397 | Contig_139 | 2648 | 3229 | + | Uncharacterized protein Q1 colocalized with Q | FIG00004682 | ff                                                                                                                                                                                                                                                                                                                                                |
| fig 6666666.28482.peg.1398 | Contig_139 | 3333 | 4514 | + | Ribonuclease D (EC 3.1.26.3)                  | FIG00000804 | isu;tRNA_processing                                                                                                                                                                                                                                                                                                                               |
| fig 6666666.28482.peg.1399 | Contig_14  | 93   | 1049 | + | DNA polymerase I (EC 2.7.7.7)                 | FIG00000404 | idu(1);DNA_Repair_Base_Excision<br>idu(1);DNA-replication                                                                                                                                                                                                                                                                                         |
| fig 6666666.28482.peg.1400 | Contig_14  | 1751 | 1056 | - | Possible membrane protein                     | FIG01121868 | ff                                                                                                                                                                                                                                                                                                                                                |
| fig 6666666.28482.peg.1401 | Contig_14  | 4690 | 1901 | - | FIG005666: putative helicase                  | FIG00005666 | icw(4);Cluster-based_Subsystem_Grouping_Hypotheses_-_perhaps_Proteosome_Related                                                                                                                                                                                                                                                                   |

|                            |           |       |      |   |                                                                          |             |                                                                                                                                                                               |
|----------------------------|-----------|-------|------|---|--------------------------------------------------------------------------|-------------|-------------------------------------------------------------------------------------------------------------------------------------------------------------------------------|
| fig 6666666.28482.peg.1402 | Contig_14 | 5659  | 4691 | - | Twin-arginine translocation protein TatC                                 | FIG00000335 | icw(1);Cluster-based_Subsystem_Grouping_Hypotheticals_-<br>_perhaps_Proteosome_Related<br>isu;Twin-arginine_translocation_system                                              |
| fig 6666666.28482.peg.1403 | Contig_14 | 5930  | 5709 | - | Twin-arginine translocation protein TatA                                 | FIG00138313 | icw(4);Cluster-based_Subsystem_Grouping_Hypotheticals_-<br>_perhaps_Proteosome_Related<br>icw(1);Twin-arginine_translocation_system                                           |
| fig 6666666.28482.peg.1404 | Contig_14 | 7003  | 6026 | - | FIG019733: possible DNA-binding protein                                  | FIG00019733 | icw(2);Cluster-based_Subsystem_Grouping_Hypotheticals_-<br>_perhaps_Proteosome_Related<br>isu;Cluster-based_Subsystem_Grouping_Hypotheticals_-<br>_perhaps_Proteosome_Related |
| fig 6666666.28482.peg.1405 | Contig_14 | 7956  | 7000 | - | FIG005453: Putative DeoR-family transcriptional regulator                | FIG00005453 | icw(8);Cluster-based_Subsystem_Grouping_Hypotheticals_-<br>_perhaps_Proteosome_Related<br>icw(3);Proteosome_archaeal                                                          |
| fig 6666666.28482.peg.1406 | Contig_14 | 9585  | 8203 | - | Pup ligase PafA, possible component of postulated heterodimer PafA-PafA' | FIG00137619 | icw(6);Cluster-based_Subsystem_Grouping_Hypotheticals_-<br>_perhaps_Proteosome_Related<br>icw(1);Proteosome_archaeal                                                          |
| fig 6666666.28482.peg.1407 | Contig_14 | 10414 | 9632 | - | Proteasome subunit alpha (EC 3.4.25.1), bacterial                        | FIG00145504 |                                                                                                                                                                               |

|                            |           |       |       |   |                                                                                   |             |                                                                                                                      |
|----------------------------|-----------|-------|-------|---|-----------------------------------------------------------------------------------|-------------|----------------------------------------------------------------------------------------------------------------------|
| fig 6666666.28482.peg.1408 | Contig_14 | 11190 | 10411 | - | Proteasome subunit beta (EC 3.4.25.1), bacterial                                  | FIG00145554 | icw(2);Cluster-based_Subsystem_Grouping_Hypotheticals_-<br>_perhaps_Proteosome_Related<br>icw(4);Proteosome_archaeal |
| fig 6666666.28482.peg.1409 | Contig_14 | 11492 | 11298 | - | Prokaryotic ubiquitin-like protein Pup                                            | FIG00016412 | icw(5);Cluster-based_Subsystem_Grouping_Hypotheticals_-<br>_perhaps_Proteosome_Related<br>icw(2);Proteosome_archaeal |
| fig 6666666.28482.peg.1410 | Contig_14 | 13104 | 11596 | - | Pup ligase PafA' paralog, possible component of postulated heterodimer PafA-PafA' | FIG00143645 | icw(2);Cluster-based_Subsystem_Grouping_Hypotheticals_-<br>_perhaps_Proteosome_Related<br>isu;Proteosome_archaeal    |
| fig 6666666.28482.peg.1411 | Contig_14 | 13251 | 14432 | + | Possible membrane protein                                                         | FIG01121868 | ff                                                                                                                   |
| fig 6666666.28482.peg.1412 | Contig_14 | 14442 | 15083 | + | FIG00821521: hypothetical protein                                                 | FIG00821520 | ff                                                                                                                   |
| fig 6666666.28482.peg.1413 | Contig_14 | 16955 | 15111 | - | hypothetical protein                                                              | FIG00638284 | ff                                                                                                                   |
| fig 6666666.28482.peg.1414 | Contig_14 | 18819 | 16990 | - | Bacterial proteasome-activating AAA-ATPase (PAN)                                  | FIG00138585 | isu;Cluster-based_Subsystem_Grouping_Hypotheticals_-<br>_perhaps_Proteosome_Related<br>isu;Proteosome_archaeal       |
| fig 6666666.28482.peg.1415 | Contig_14 | 19144 | 19692 | + | Probable conserved lipoprotein lppK                                               | FIG01324282 | ff                                                                                                                   |
| fig 6666666.28482.peg.1416 | Contig_14 | 19698 | 20000 | + | YlxP-like protein                                                                 | FIG00001863 | isu;NusA-TFII_Cluster<br>isu;CBSS-350688.3.peg.1509                                                                  |
| fig 6666666.28482.peg.1417 | Contig_14 | 20845 | 20003 | - | RNA methyltransferase                                                             | FIG01124700 | ff                                                                                                                   |

|                            |           |       |       |   |                                                                                  |             |                                                                      |
|----------------------------|-----------|-------|-------|---|----------------------------------------------------------------------------------|-------------|----------------------------------------------------------------------|
| fig 6666666.28482.peg.1418 | Contig_14 | 20995 | 21786 | + | RecB family exonuclease                                                          | FIG00815647 | ff                                                                   |
| fig 6666666.28482.peg.1419 | Contig_14 | 22034 | 23293 | + | ATP-dependent RNA<br>helicase                                                    | FIG01231651 | ff                                                                   |
| fig 6666666.28482.peg.1420 | Contig_14 | 23301 | 23516 | + | hypothetical protein                                                             |             |                                                                      |
| fig 6666666.28482.peg.1421 | Contig_14 | 24970 | 23603 | - | PF00070 family, FAD-<br>dependent NAD(P)-<br>disulphide<br>oxidoreductase        | FIG00001597 | idu(1);Mercuric_reductase                                            |
| fig 6666666.28482.peg.1422 | Contig_14 | 25476 | 24967 | - | Hypothetical membrane<br>protein Rv2120c                                         | FIG01326130 | ff                                                                   |
| fig 6666666.28482.peg.1423 | Contig_14 | 26459 | 25602 | - | ATP<br>phosphoribosyltransferas<br>e (EC 2.4.2.17)                               | FIG00000811 | icw(1);Riboflavin_synthesis_cluster<br>icw(1);Histidine_Biosynthesis |
| fig 6666666.28482.peg.1424 | Contig_14 | 26725 | 26462 | - | Phosphoribosyl-ATP<br>pyrophosphatase (EC<br>3.6.1.31)                           | FIG00000871 | isu;Riboflavin_synthesis_cluster<br>isu;Histidine_Biosynthesis       |
| fig 6666666.28482.peg.1425 | Contig_14 | 26848 | 27273 | + | JadX-like protein                                                                |             |                                                                      |
| fig 6666666.28482.peg.1426 | Contig_14 | 31033 | 27284 | - | 5-methyltetrahydrofolate-<br>-homocysteine<br>methyltransferase (EC<br>2.1.1.13) | FIG00000672 | ff                                                                   |
| fig 6666666.28482.peg.1427 | Contig_14 | 31388 | 32263 | + | FIG00823557:<br>hypothetical protein                                             | FIG00823551 | ff                                                                   |
| fig 6666666.28482.peg.1428 | Contig_14 | 33143 | 32268 | - | Oxidoreductase, short-<br>chain<br>dehydrogenase/reductas<br>e family            | FIG00993242 | ff                                                                   |

|                            |           |       |       |   |                                                                                      |             |                                                                                                                                                                                                                                                                                                                                                      |
|----------------------------|-----------|-------|-------|---|--------------------------------------------------------------------------------------|-------------|------------------------------------------------------------------------------------------------------------------------------------------------------------------------------------------------------------------------------------------------------------------------------------------------------------------------------------------------------|
| fig 6666666.28482.peg.1429 | Contig_14 | 34787 | 33324 | - | Long-chain-fatty-acid--<br>CoA ligase (EC 6.2.1.3)                                   | FIG00018699 | idu(72);n-<br>Phenylalkanoic_acid_degradation<br>idu(72);Fatty_acid_metabolism_clust<br>er idu(72);Biotin_synthesis_cluster<br>idu(72);Biotin_biosynthesis                                                                                                                                                                                           |
| fig 6666666.28482.peg.1430 | Contig_14 | 35837 | 34899 | - | hypothetical protein                                                                 | FIG00638284 | ff                                                                                                                                                                                                                                                                                                                                                   |
| fig 6666666.28482.peg.1431 | Contig_14 | 36493 | 35834 | - | Nitroreductase                                                                       |             |                                                                                                                                                                                                                                                                                                                                                      |
| fig 6666666.28482.peg.1432 | Contig_14 | 37602 | 36490 | - | hypothetical protein                                                                 |             |                                                                                                                                                                                                                                                                                                                                                      |
| fig 6666666.28482.peg.1433 | Contig_14 | 37704 | 38612 | + | Enoyl-CoA hydratase (EC<br>4.2.1.17)                                                 | FIG00033206 | icw(1);n-<br>Phenylalkanoic_acid_degradation<br>idu(51);Polyhydroxybutyrate_metabo<br>lism icw(1);Isoleucine_degradation<br>icw(1);Fatty_acid_metabolism_cluste<br>r icw(1);Lysine_fermentation<br>icw(1);Butanol_Biosynthesis<br>icw(1);Acetyl-<br>CoA_fermentation_to_Butyrate<br>icw(1);Valine_degradation<br>idu(51);Butyrate_metabolism_cluster |
| fig 6666666.28482.peg.1434 | Contig_14 | 38651 | 39061 | + | Uncharacterized protein,<br>possibly involved in<br>aromatic compounds<br>catabolism | FIG00955696 | ff                                                                                                                                                                                                                                                                                                                                                   |
| fig 6666666.28482.peg.1435 | Contig_14 | 40077 | 39040 | - | acyl-CoA dehydrogenase<br>domain protein                                             |             |                                                                                                                                                                                                                                                                                                                                                      |

|                            |           |       |       |   |                                                  |             |                                                                                                                                                                                                                                                                                                                                        |
|----------------------------|-----------|-------|-------|---|--------------------------------------------------|-------------|----------------------------------------------------------------------------------------------------------------------------------------------------------------------------------------------------------------------------------------------------------------------------------------------------------------------------------------|
| fig 6666666.28482.peg.1436 | Contig_14 | 40164 | 41324 | + | Butyryl-CoA dehydrogenase (EC 1.3.99.2)          | FIG00009149 | idu(39);Isoleucine_degradation<br>idu(39);Lysine_fermentation<br>idu(39);Butanol_Biosynthesis<br>idu(39);Acetyl-CoA_fermentation_to_Butyrate<br>idu(39);Valine_degradation<br>idu(39);Anaerobic_respiratory_reductions                                                                                                                 |
| fig 6666666.28482.peg.1437 | Contig_14 | 42059 | 41313 | - | transcriptional regulator, TetR family           |             |                                                                                                                                                                                                                                                                                                                                        |
| fig 6666666.28482.peg.1438 | Contig_14 | 42469 | 43614 | + | BarH                                             | FIG00668014 | ff                                                                                                                                                                                                                                                                                                                                     |
| fig 6666666.28482.peg.1439 | Contig_14 | 44406 | 43633 | - | Enoyl-CoA hydratase (EC 4.2.1.17)                | FIG00033206 | idu(51);n-Phenylalkanoic_acid_degradation<br>idu(51);Polyhydroxybutyrate_metabolism icw(1);Isoleucine_degradation<br>idu(51);Fatty_acid_metabolism_cluster icw(1);Lysine_fermentation<br>icw(1);Butanol_Biosynthesis<br>icw(1);Acetyl-CoA_fermentation_to_Butyrate<br>icw(1);Valine_degradation<br>idu(51);Butyrate_metabolism_cluster |
| fig 6666666.28482.peg.1440 | Contig_14 | 45539 | 44454 | - | D-3-phosphoglycerate dehydrogenase (EC 1.1.1.95) | FIG00031250 | idu(4);Serine_Biosynthesis<br>idu(4);Pyridoxin_(Vitamin_B6)_Biosynthesis                                                                                                                                                                                                                                                               |
| fig 6666666.28482.peg.1441 | Contig_14 | 46654 | 45536 | - | conserved hypothetical protein                   |             |                                                                                                                                                                                                                                                                                                                                        |

|                            |           |       |       |   |                                                              |             |                                                                                                                                                                                                                                                                                                                  |
|----------------------------|-----------|-------|-------|---|--------------------------------------------------------------|-------------|------------------------------------------------------------------------------------------------------------------------------------------------------------------------------------------------------------------------------------------------------------------------------------------------------------------|
| fig 6666666.28482.peg.1442 | Contig_14 | 47497 | 46703 | - | 2,4-dihydroxyhept-2-ene-1,7-dioic acid aldolase (EC 4.1.2.-) | FIG00110223 | idu(1);Aromatic_amino_acid_degradation idu(1);4-Hydroxyphenylacetic_acid_catabolic_pathway                                                                                                                                                                                                                       |
| fig 6666666.28482.peg.1443 | Contig_14 | 47586 | 48731 | + | Acetyl-CoA acetyltransferase                                 | FIG01005417 | ff                                                                                                                                                                                                                                                                                                               |
| fig 6666666.28482.peg.1444 | Contig_14 | 49016 | 49135 | + | hypothetical protein                                         |             |                                                                                                                                                                                                                                                                                                                  |
| fig 6666666.28482.peg.1445 | Contig_14 | 50549 | 49125 | - | Long-chain-fatty-acid--CoA ligase (EC 6.2.1.3)               | FIG00018699 | idu(72);n-Phenylalkanoic_acid_degradation idu(72);Fatty_acid_metabolism_cluster idu(72);Biotin_synthesis_cluster idu(72);Biotin_biosynthesis                                                                                                                                                                     |
| fig 6666666.28482.peg.1446 | Contig_14 | 50752 | 51627 | + | Oxidoreductase, short chain dehydrogenase/reductase family   | FIG00445780 | ff                                                                                                                                                                                                                                                                                                               |
| fig 6666666.28482.peg.1447 | Contig_14 | 52458 | 51631 | - | Enoyl-CoA hydratase (EC 4.2.1.17)                            | FIG00033206 | icw(4);n-Phenylalkanoic_acid_degradation icw(3);Polyhydroxybutyrate_metabolism icw(3);Isoleucine_degradation icw(4);Fatty_acid_metabolism_cluster icw(3);Lysine_fermentation icw(3);Butanol_Biosynthesis icw(3);Acetyl-CoA_fermentation_to_Butyrate icw(3);Valine_degradation icw(3);Butyrate_metabolism_cluster |

|                            |           |       |       |   |                                   |             |                                                                                                                                                                                                                                                                                                                                          |
|----------------------------|-----------|-------|-------|---|-----------------------------------|-------------|------------------------------------------------------------------------------------------------------------------------------------------------------------------------------------------------------------------------------------------------------------------------------------------------------------------------------------------|
| fig 6666666.28482.peg.1448 | Contig_14 | 52512 | 53762 | + | hypothetical protein              | FIG00638284 | ff                                                                                                                                                                                                                                                                                                                                       |
| fig 6666666.28482.peg.1449 | Contig_14 | 53767 | 54573 | + | Enoyl-CoA hydratase (EC 4.2.1.17) | FIG00033206 | icw(5);n-Phenylalkanoic_acid_degradation<br>icw(3);Polyhydroxybutyrate_metabolism<br>icw(3);Isoleucine_degradation<br>icw(5);Fatty_acid_metabolism_cluster<br>icw(3);Lysine_fermentation<br>icw(3);Butanol_Biosynthesis<br>icw(3);Acetyl-CoA_fermentation_to_Butyrate<br>icw(3);Valine_degradation<br>icw(3);Butyrate_metabolism_cluster |
| fig 6666666.28482.peg.1450 | Contig_14 | 54580 | 55827 | + | putative acyl-CoA dehydrogenase   | FIG00476656 | ff                                                                                                                                                                                                                                                                                                                                       |
| fig 6666666.28482.peg.1451 | Contig_14 | 55824 | 56639 | + | Enoyl-CoA hydratase (EC 4.2.1.17) | FIG00033206 | icw(4);n-Phenylalkanoic_acid_degradation<br>icw(3);Polyhydroxybutyrate_metabolism<br>icw(3);Isoleucine_degradation<br>icw(4);Fatty_acid_metabolism_cluster<br>icw(3);Lysine_fermentation<br>icw(3);Butanol_Biosynthesis<br>icw(3);Acetyl-CoA_fermentation_to_Butyrate<br>icw(3);Valine_degradation<br>icw(3);Butyrate_metabolism_cluster |

|                            |           |       |       |   |                                                           |             |                                                                                                                                                                                                                                                                                                                                          |
|----------------------------|-----------|-------|-------|---|-----------------------------------------------------------|-------------|------------------------------------------------------------------------------------------------------------------------------------------------------------------------------------------------------------------------------------------------------------------------------------------------------------------------------------------|
| fig 6666666.28482.peg.1452 | Contig_14 | 56636 | 57436 | + | Enoyl-CoA hydratase (EC 4.2.1.17)                         | FIG00033206 | icw(4);n-Phenylalkanoic_acid_degradation<br>icw(3);Polyhydroxybutyrate_metabolism<br>icw(3);Isoleucine_degradation<br>icw(4);Fatty_acid_metabolism_cluster<br>icw(3);Lysine_fermentation<br>icw(3);Butanol_Biosynthesis<br>icw(3);Acetyl-CoA_fermentation_to_Butyrate<br>icw(3);Valine_degradation<br>icw(3);Butyrate_metabolism_cluster |
| fig 6666666.28482.peg.1453 | Contig_14 | 57433 | 58884 | + | Long-chain-fatty-acid--CoA ligase (EC 6.2.1.3)            | FIG00018699 | idu(72);n-Phenylalkanoic_acid_degradation<br>idu(72);Fatty_acid_metabolism_cluster<br>idu(72);Biotin_synthesis_cluster<br>idu(72);Biotin_biosynthesis                                                                                                                                                                                    |
| fig 6666666.28482.peg.1454 | Contig_14 | 59227 | 59346 | + | hypothetical protein                                      | FIG00822651 | ff                                                                                                                                                                                                                                                                                                                                       |
| fig 6666666.28482.peg.1455 | Contig_14 | 59366 | 60073 | + | FIG00822652:<br>hypothetical protein                      |             |                                                                                                                                                                                                                                                                                                                                          |
| fig 6666666.28482.peg.1456 | Contig_14 | 60169 | 60531 | + | hypothetical protein                                      | FIG00621114 | idu(38);CBSS-246196.1.peg.364<br>idu(38);CBSS-164757.7.peg.5020<br>idu(38);Fatty_Acid_Biosynthesis_FASII                                                                                                                                                                                                                                 |
| fig 6666666.28482.peg.1457 | Contig_14 | 60544 | 61146 | + | hypothetical protein                                      |             |                                                                                                                                                                                                                                                                                                                                          |
| fig 6666666.28482.peg.1458 | Contig_14 | 61143 | 61901 | + | 3-oxoacyl-[acyl-carrier protein] reductase (EC 1.1.1.100) |             |                                                                                                                                                                                                                                                                                                                                          |
| fig 6666666.28482.peg.1459 | Contig_14 | 61913 | 62800 | + | luciferase-like protein                                   | FIG00668014 | ff                                                                                                                                                                                                                                                                                                                                       |
| fig 6666666.28482.peg.1460 | Contig_14 | 63027 | 64205 | + | BarH                                                      |             |                                                                                                                                                                                                                                                                                                                                          |

|                            |           |       |       |   |                                         |                                                                                                                                                                                                                              |
|----------------------------|-----------|-------|-------|---|-----------------------------------------|------------------------------------------------------------------------------------------------------------------------------------------------------------------------------------------------------------------------------|
| fig 6666666.28482.peg.1461 | Contig_14 | 65762 | 64278 | - | hypothetical protein                    |                                                                                                                                                                                                                              |
| fig 6666666.28482.peg.1462 | Contig_14 | 67036 | 65831 | - | Butyryl-CoA dehydrogenase (EC 1.3.99.2) | FIG00009149 icw(2);Isoleucine_degradation<br>icw(2);Lysine_fermentation<br>icw(2);Butanol_Biosynthesis<br>icw(2);Acetyl-CoA_fermentation_to_Butyrate<br>icw(2);Valine_degradation<br>icw(2);Anaerobic_respiratory_reductases |
| fig 6666666.28482.peg.1463 | Contig_14 | 67998 | 67030 | - | Butyryl-CoA dehydrogenase (EC 1.3.99.2) | FIG00009149 icw(2);Isoleucine_degradation<br>icw(2);Lysine_fermentation<br>icw(2);Butanol_Biosynthesis<br>icw(2);Acetyl-CoA_fermentation_to_Butyrate<br>icw(2);Valine_degradation<br>icw(2);Anaerobic_respiratory_reductases |
| fig 6666666.28482.peg.1464 | Contig_14 | 69202 | 68006 | - | amidohydrolase 2                        | FIG00501263 ff                                                                                                                                                                                                               |
| fig 6666666.28482.peg.1465 | Contig_14 | 69450 | 70565 | + | Butyryl-CoA dehydrogenase (EC 1.3.99.2) | FIG00009149 icw(2);Isoleucine_degradation<br>icw(2);Lysine_fermentation<br>icw(2);Butanol_Biosynthesis<br>icw(2);Acetyl-CoA_fermentation_to_Butyrate<br>icw(2);Valine_degradation<br>icw(2);Anaerobic_respiratory_reductases |
| fig 6666666.28482.peg.1466 | Contig_14 | 70562 | 71464 | + | luciferase                              |                                                                                                                                                                                                                              |
| fig 6666666.28482.peg.1467 | Contig_14 | 71908 | 71471 | - | hypothetical protein                    | FIG00638284 ff                                                                                                                                                                                                               |
| fig 6666666.28482.peg.1468 | Contig_14 | 71959 | 72588 | + | Isochorismatase (EC 3.3.2.1)            | FIG00009017 idu(3);Chorismate:_Intermediate_for_synthesis_of_Tryptophan,_PAPA_antibiotics,_PABA,_3-hydroxyanthranilate_and_more.                                                                                             |
| fig 6666666.28482.peg.1469 | Contig_14 | 72691 | 73884 | + | BarH                                    | FIG00668014 ff                                                                                                                                                                                                               |

|                            |           |       |       |   |                                                           |             |                                                                                                                        |
|----------------------------|-----------|-------|-------|---|-----------------------------------------------------------|-------------|------------------------------------------------------------------------------------------------------------------------|
| fig 6666666.28482.peg.1470 | Contig_14 | 73881 | 74360 | + | Acyl dehydratase                                          | FIG01303815 | idu(2);CBSS-246196.1.peg.364                                                                                           |
| fig 6666666.28482.peg.1471 | Contig_14 | 76759 | 74357 | - | FIG00820650:                                              | FIG00820648 | ff                                                                                                                     |
|                            |           |       |       |   | hypothetical protein                                      |             |                                                                                                                        |
| fig 6666666.28482.peg.1472 | Contig_14 | 78219 | 76756 | - | Betaine aldehyde dehydrogenase (EC 1.2.1.8)               | FIG01304892 | idu(1);Choline_uptake_and_conversion_to_betaine_clusters<br>idu(1);Choline_and_Betaine_Uptake_and_Betaine_Biosynthesis |
| fig 6666666.28482.peg.1473 | Contig_14 | 78451 | 79644 | + | putative cytochrome P450 hydroxylase                      | FIG00032437 | idu(49);Nitric_oxide_synthase                                                                                          |
| fig 6666666.28482.peg.1474 | Contig_14 | 79644 | 80831 | + | FadE26_2                                                  | FIG01708305 | ff                                                                                                                     |
| fig 6666666.28482.peg.1475 | Contig_14 | 80849 | 81421 | + | FIG00820262:                                              | FIG00820260 | ff                                                                                                                     |
|                            |           |       |       |   | hypothetical protein                                      |             |                                                                                                                        |
| fig 6666666.28482.peg.1476 | Contig_14 | 81421 | 81834 | + | hypothetical protein                                      |             |                                                                                                                        |
| fig 6666666.28482.peg.1477 | Contig_14 | 81857 | 82966 | + | FIG00821501:                                              | FIG00821499 | ff                                                                                                                     |
|                            |           |       |       |   | hypothetical protein                                      |             |                                                                                                                        |
| fig 6666666.28482.peg.1478 | Contig_14 | 82963 | 83415 | + | involved in the lipid metabolism                          | FIG01582522 | ff                                                                                                                     |
| fig 6666666.28482.peg.1479 | Contig_14 | 83412 | 84581 | + | putative thiolase                                         | FIG01122915 | ff                                                                                                                     |
| fig 6666666.28482.peg.1480 | Contig_14 | 84605 | 85201 | + | Transcriptional regulator, TetR family                    | FIG00554417 | ff                                                                                                                     |
| fig 6666666.28482.peg.1481 | Contig_14 | 86083 | 85211 | - | Transcriptional regulator, IclR family                    | FIG00022569 | idu(12);Homogentisate_pathway_of_aromatic_compound_degradation                                                         |
| fig 6666666.28482.peg.1482 | Contig_14 | 86178 | 87227 | + | oxidoreductase, zinc-binding dehydrogenase family protein | FIG00824870 | ff                                                                                                                     |
| fig 6666666.28482.peg.1483 | Contig_14 | 87227 | 87634 | + | hypothetical protein                                      |             |                                                                                                                        |
| fig 6666666.28482.peg.1484 | Contig_14 | 87627 | 88460 | + | Short-chain dehydrogenase/reductase SDR precursor         | FIG00917812 | ff                                                                                                                     |
| fig 6666666.28482.peg.1485 | Contig_14 | 88469 | 89422 | + | hypothetical protein                                      | FIG00638284 | ff                                                                                                                     |

|                            |           |        |        |   |                                                            |             |                                                                                                                                                       |
|----------------------------|-----------|--------|--------|---|------------------------------------------------------------|-------------|-------------------------------------------------------------------------------------------------------------------------------------------------------|
| fig 6666666.28482.peg.1486 | Contig_14 | 89645  | 90871  | + | putative cytochrome P450 hydroxylase                       | FIG00032437 | icw(1);Nitric_oxide_synthase                                                                                                                          |
| fig 6666666.28482.peg.1487 | Contig_14 | 91052  | 92059  | + | hypothetical protein                                       |             |                                                                                                                                                       |
| fig 6666666.28482.peg.1488 | Contig_14 | 93387  | 92194  | - | putative cytochrome P450 hydroxylase                       | FIG00032437 | icw(1);Nitric_oxide_synthase                                                                                                                          |
| fig 6666666.28482.peg.1489 | Contig_14 | 94655  | 93423  | - | L-carnitine dehydratase/bile acid-inducible protein F      | FIG01318850 | ff                                                                                                                                                    |
| fig 6666666.28482.peg.1490 | Contig_14 | 95310  | 94780  | - | hypothetical protein                                       |             |                                                                                                                                                       |
| fig 6666666.28482.peg.1491 | Contig_14 | 95426  | 97036  | + | Long-chain-fatty-acid--CoA ligase (EC 6.2.1.3)             | FIG00018699 | idu(72);n-Phenylalkanoic_acid_degradation<br>idu(72);Fatty_acid_metabolism_cluster<br>idu(72);Biotin_synthesis_cluster<br>idu(72);Biotin_biosynthesis |
| fig 6666666.28482.peg.1492 | Contig_14 | 97473  | 97033  | - | hypothetical protein                                       |             |                                                                                                                                                       |
| fig 6666666.28482.peg.1493 | Contig_14 | 97586  | 98374  | + | Oxidoreductase, short-chain dehydrogenase/reductase family | FIG00824296 | ff                                                                                                                                                    |
| fig 6666666.28482.peg.1494 | Contig_14 | 98451  | 99485  | + | FIG00826901: hypothetical protein                          | FIG00826898 | ff                                                                                                                                                    |
| fig 6666666.28482.peg.1495 | Contig_14 | 100264 | 99482  | - | Short-chain dehydrogenase/reductase SDR( EC:1.1.1.100 )    |             |                                                                                                                                                       |
| fig 6666666.28482.peg.1496 | Contig_14 | 100350 | 101162 | + | hypothetical protein                                       |             |                                                                                                                                                       |
| fig 6666666.28482.peg.1497 | Contig_14 | 102161 | 101199 | - | hypothetical protein                                       |             |                                                                                                                                                       |
| fig 6666666.28482.peg.1498 | Contig_14 | 103214 | 102372 | - | 3-oxoacyl-[acyl-carrier protein] reductase (EC 1.1.1.100)  | FIG00621114 | idu(38);CBSS-246196.1.peg.364<br>idu(38);CBSS-164757.7.peg.5020<br>idu(38);Fatty_Acid_Biosynthesis_FASII                                              |

|                            |           |        |        |   |                                                                    |             |                                                                                                                                                                               |
|----------------------------|-----------|--------|--------|---|--------------------------------------------------------------------|-------------|-------------------------------------------------------------------------------------------------------------------------------------------------------------------------------|
| fig 6666666.28482.peg.1499 | Contig_14 | 103364 | 104086 | + | short chain dehydrogenase                                          |             |                                                                                                                                                                               |
| fig 6666666.28482.peg.1500 | Contig_14 | 104175 | 104924 | + | oxidoreductase, short chain dehydrogenase/reductase family protein | FIG01225860 | ff                                                                                                                                                                            |
| fig 6666666.28482.peg.1501 | Contig_14 | 105085 | 106131 | + | hypothetical protein                                               |             |                                                                                                                                                                               |
| fig 6666666.28482.peg.1502 | Contig_14 | 107246 | 106182 | - | conserved hypothetical protein                                     |             |                                                                                                                                                                               |
| fig 6666666.28482.peg.1503 | Contig_14 | 108509 | 107259 | - | putative cytochrome P450 hydroxylase                               | FIG00032437 | idu(49);Nitric_oxide_synthase                                                                                                                                                 |
| fig 6666666.28482.peg.1504 | Contig_14 | 108626 | 109699 | + | hypothetical protein                                               | FIG00638284 | ff                                                                                                                                                                            |
| fig 6666666.28482.peg.1505 | Contig_14 | 110878 | 109691 | - | hypothetical protein                                               |             |                                                                                                                                                                               |
| fig 6666666.28482.peg.1506 | Contig_14 | 110975 | 112099 | + | FIG00825548: hypothetical protein                                  | FIG00825545 | ff                                                                                                                                                                            |
| fig 6666666.28482.peg.1507 | Contig_14 | 112248 | 112790 | + | Putative TetR-type transcriptional regulator                       |             |                                                                                                                                                                               |
| fig 6666666.28482.peg.1508 | Contig_14 | 112911 | 114191 | + | FIG00821608: hypothetical protein                                  | FIG00821607 | ff                                                                                                                                                                            |
| fig 6666666.28482.peg.1509 | Contig_14 | 114184 | 114978 | + | Short-chain dehydrogenase/reductase SDR                            | FIG00546160 | idu(13);CBSS-164757.7.peg.5020<br>idu(13);Transcription_repair_cluster                                                                                                        |
| fig 6666666.28482.peg.1510 | Contig_14 | 114975 | 116444 | + | Aldehyde dehydrogenase (EC 1.2.1.3)                                | FIG01292786 | idu(16);Pyruvate_metabolism_II:_acetyl-CoA,_acetogenesis_from_pyruvate icw(1);Glycerolipid_and_Glycerophospholipid_Metabolism_in_Bacteria<br>idu(16);Methylglyoxal_Metabolism |

|                            |           |        |        |   |                                                                                |             |                                                                                                                                          |
|----------------------------|-----------|--------|--------|---|--------------------------------------------------------------------------------|-------------|------------------------------------------------------------------------------------------------------------------------------------------|
| fig 6666666.28482.peg.1511 | Contig_14 | 116484 | 117629 | + | Alcohol dehydrogenase (EC 1.1.1.1)                                             | FIG01007502 | idu(17);Glycerolipid_and_Glycerophospholipid_Metabolism_in_Bacteria<br>idu(17);Fermentations:_Mixed_acid<br>idu(17);Butanol_Biosynthesis |
| fig 6666666.28482.peg.1512 | Contig_14 | 117650 | 118048 | + | hypothetical protein                                                           |             |                                                                                                                                          |
| fig 6666666.28482.peg.1513 | Contig_14 | 119220 | 118045 | - | L-cysteine:1D-myo-inosityl 2-amino-2-deoxy-alpha-D-glucopyranoside ligase MshC | FIG00146048 | isu;Glutathione_analogs:_mycothiol                                                                                                       |
| fig 6666666.28482.peg.1514 | Contig_14 | 120095 | 119307 | - | Protein cysQ homolog                                                           | FIG01309573 | ff                                                                                                                                       |
| fig 6666666.28482.peg.1515 | Contig_14 | 120938 | 120150 | - | Phosphatidylinositol 3- and 4-kinase family protein                            | FIG01122160 | ff                                                                                                                                       |
| fig 6666666.28482.peg.1516 | Contig_14 | 121545 | 120958 | - | FIG00820819:<br>hypothetical protein                                           | FIG00820818 | ff                                                                                                                                       |
| fig 6666666.28482.peg.1517 | Contig_14 | 122376 | 121609 | - | Phosphoglycerate mutase (EC 5.4.2.1)                                           | FIG00005840 | idu(2);Phosphoglycerate_mutase_protein_family                                                                                            |
| fig 6666666.28482.peg.1518 | Contig_14 | 122720 | 122418 | - | FIG00821698:<br>hypothetical protein                                           | FIG00821697 | ff                                                                                                                                       |
| fig 6666666.28482.peg.1519 | Contig_14 | 122885 | 123898 | + | Lipoprotein LppL                                                               | FIG01001528 | ff                                                                                                                                       |
| fig 6666666.28482.peg.1520 | Contig_14 | 123952 | 124158 | + | FIG00821060:<br>hypothetical protein                                           | FIG00821059 | ff                                                                                                                                       |
| fig 6666666.28482.peg.1521 | Contig_14 | 124158 | 125276 | + | Dihydroorotate dehydrogenase (EC 1.3.3.1)                                      | FIG00000475 | ff                                                                                                                                       |
| fig 6666666.28482.peg.1522 | Contig_14 | 125461 | 127524 | + | hypothetical protein                                                           | FIG00638284 | ff                                                                                                                                       |
| fig 6666666.28482.peg.1523 | Contig_14 | 128133 | 127603 | - | Phospholipid-binding protein                                                   | FIG01351068 | ff                                                                                                                                       |
| fig 6666666.28482.peg.1524 | Contig_14 | 129505 | 128159 | - | FIG016551: Putative peptidase                                                  | FIG01398458 | ff                                                                                                                                       |
| fig 6666666.28482.rna.23   | Contig_14 | 129629 | 129714 | + | tRNA-Leu-GAG                                                                   |             | isu;tRNAs                                                                                                                                |

|                            |            |        |        |   |                                                                                    |             |                                                                                                                                                           |
|----------------------------|------------|--------|--------|---|------------------------------------------------------------------------------------|-------------|-----------------------------------------------------------------------------------------------------------------------------------------------------------|
| fig 6666666.28482.peg.1525 | Contig_14  | 130098 | 129898 | - | hypothetical protein                                                               |             |                                                                                                                                                           |
| fig 6666666.28482.peg.1526 | Contig_14  | 130254 | 130931 | + | Phosphoribosyl transferase domain protein                                          | FIG01348412 | ff                                                                                                                                                        |
| fig 6666666.28482.peg.1527 | Contig_14  | 131297 | 130935 | - | Probable transmembrane protein                                                     | FIG01276430 | ff                                                                                                                                                        |
| fig 6666666.28482.peg.1528 | Contig_14  | 132182 | 131379 | - | FIG055075: Possibly a cell division protein, antigen 84 in Mycobacteria            | FIG00340323 | ff                                                                                                                                                        |
| fig 6666666.28482.peg.1529 | Contig_14  | 132724 | 132422 | - | FIG021764: Possible membrane protein                                               | FIG00021764 | ff                                                                                                                                                        |
| fig 6666666.28482.peg.1530 | Contig_14  | 133473 | 132844 | - | FIG021292: hypothetical protein                                                    | FIG00340333 | ff                                                                                                                                                        |
| fig 6666666.28482.peg.1531 | Contig_14  | 134315 | 133539 | - | Hypothetical protein YggS, proline synthase co-transcribed bacterial homolog PROSC | FIG00003955 | isu;A_Hypothetical_Protein_Related_to_Proline_Metabolism                                                                                                  |
| fig 6666666.28482.peg.1532 | Contig_14  | 134521 | 134321 | - | COG1496: Uncharacterized conserved protein                                         | FIG00003370 | ff                                                                                                                                                        |
| fig 6666666.28482.peg.1533 | Contig_140 | 2017   | 104    | - | 1-deoxy-D-xylulose 5-phosphate synthase (EC 2.2.1.7)                               | FIG00000343 | isu;Thiamin_biosynthesis<br>isu;Nonmevalonate_Branch_of_Isoprenoid_Biosynthesis<br>isu;Pyridoxin_(Vitamin_B6)_Biosynthesis<br>isu;Isoprenoid_Biosynthesis |
| fig 6666666.28482.peg.1534 | Contig_140 | 2071   | 2514   | + | FIG00822000: hypothetical protein                                                  | FIG00821999 | ff                                                                                                                                                        |
| fig 6666666.28482.peg.1535 | Contig_140 | 2540   | 3829   | + | Na <sup>+</sup> /H <sup>+</sup> antiporter NhaD type                               | FIG01261528 | ff                                                                                                                                                        |

|                            |            |      |      |   |                                                                                  |             |                                                                                                                                                                |
|----------------------------|------------|------|------|---|----------------------------------------------------------------------------------|-------------|----------------------------------------------------------------------------------------------------------------------------------------------------------------|
| fig 6666666.28482.peg.1536 | Contig_140 | 5121 | 3913 | - | 23S rRNA (Uracil-5-) - methyltransferase Ruma (EC 2.1.1.-)                       | FIG01304282 | isu;RNA_methylation                                                                                                                                            |
| fig 6666666.28482.peg.1537 | Contig_140 | 7124 | 5130 | - | PROBABLE CONSERVED INTEGRAL MEMBRANE ALANINE AND VALINE AND LEUCINE RICH PROTEIN | FIG00945276 | ff                                                                                                                                                             |
| fig 6666666.28482.peg.1538 | Contig_140 | 7214 | 7897 | + | Trk system potassium uptake protein TrkA                                         | FIG00000838 | icw(1);Potassium_homeostasis                                                                                                                                   |
| fig 6666666.28482.peg.1539 | Contig_140 | 7894 | 8568 | + | Trk system potassium uptake protein TrkA                                         | FIG00000838 | icw(1);Potassium_homeostasis                                                                                                                                   |
| fig 6666666.28482.peg.1540 | Contig_140 | 9382 | 8708 | - | PROBABLE CONSERVED INTEGRAL MEMBRANE ALANINE AND LEUCINE RICH PROTEIN            | FIG00672006 | ff                                                                                                                                                             |
| fig 6666666.28482.peg.1541 | Contig_140 | 9747 | 9379 | - | FIG00945047: hypothetical protein                                                | FIG00945046 | ff                                                                                                                                                             |
| fig 6666666.28482.peg.1542 | Contig_141 | 36   | 278  | + | Ornithine carbamoyltransferase (EC 2.1.3.3)                                      | FIG00000084 | icw(1);Arginine_and_Ornithine_Degradation<br>icw(1);Arginine_Deiminase_Pathway<br>icw(3);Arginine_Biosynthesis_--_gjo<br>icw(3);Arginine_Biosynthesis_extended |

|                            |            |       |       |   |                                                                    |             |                                                                                                                                                    |
|----------------------------|------------|-------|-------|---|--------------------------------------------------------------------|-------------|----------------------------------------------------------------------------------------------------------------------------------------------------|
| fig 6666666.28482.peg.1543 | Contig_141 | 275   | 769   | + | Arginine pathway regulatory protein ArgR, repressor of arg regulon | FIG00003270 | isu;Arginine_and_Ornithine_Degradation<br>isu;Arginine_Deiminase_Pathway<br>isu;Arginine_Biosynthesis_--_gjo<br>isu;Arginine_Biosynthesis_extended |
| fig 6666666.28482.peg.1544 | Contig_141 | 782   | 1993  | + | Argininosuccinate synthase (EC 6.3.4.5)                            | FIG00000301 | icw(2);Arginine_Biosynthesis_--_gjo<br>icw(2);Arginine_Biosynthesis_extended                                                                       |
| fig 6666666.28482.peg.1545 | Contig_141 | 2073  | 3491  | + | Argininosuccinate lyase (EC 4.3.2.1)                               | FIG00000333 | icw(1);Arginine_Biosynthesis_--_gjo<br>icw(1);Arginine_Biosynthesis_extended                                                                       |
| fig 6666666.28482.peg.1546 | Contig_141 | 3986  | 5047  | + | Chalcone synthase (EC 2.3.1.74)                                    | FIG00443156 | ff                                                                                                                                                 |
| fig 6666666.28482.peg.1547 | Contig_141 | 5181  | 11513 | + | Malonyl CoA-acyl carrier protein transacylase (EC 2.3.1.39)        | FIG00000319 | idu(7);Fatty_Acid_Biosynthesis_FASII                                                                                                               |
| fig 6666666.28482.peg.1548 | Contig_141 | 11529 | 17858 | + | Malonyl CoA-acyl carrier protein transacylase (EC 2.3.1.39)        | FIG00000319 | icw(1);Fatty_Acid_Biosynthesis_FASII                                                                                                               |
| fig 6666666.28482.peg.1549 | Contig_141 | 17897 | 20986 | + | Malonyl CoA-acyl carrier protein transacylase (EC 2.3.1.39)        | FIG00000319 | icw(1);Fatty_Acid_Biosynthesis_FASII                                                                                                               |
| fig 6666666.28482.peg.1550 | Contig_141 | 21168 | 22229 | + | Chalcone synthase (EC 2.3.1.74)                                    | FIG00443156 | ff                                                                                                                                                 |
| fig 6666666.28482.peg.1551 | Contig_142 | 155   | 292   | + | hypothetical protein                                               |             |                                                                                                                                                    |

|                            |            |      |       |   |                                                            |             |                                                                                                                                               |
|----------------------------|------------|------|-------|---|------------------------------------------------------------|-------------|-----------------------------------------------------------------------------------------------------------------------------------------------|
| fig 6666666.28482.peg.1552 | Contig_143 | 1347 | 52    | - | Integrase, catalytic region                                |             |                                                                                                                                               |
| fig 6666666.28482.peg.1553 | Contig_144 | 824  | 123   | - | Transcriptional regulator, IclR family                     | FIG00022569 | idu(12);Homogentisate_pathway_of_aromatic_compound_degradation                                                                                |
| fig 6666666.28482.peg.1554 | Contig_144 | 890  | 2326  | + | 3-isopropylmalate dehydratase large subunit (EC 4.2.1.33)  | FIG00000280 | icw(1);Branched-Chain_Amino_Acid_Biosynthesis<br>icw(1);Leucine_Biosynthesis                                                                  |
| fig 6666666.28482.peg.1555 | Contig_144 | 2344 | 2940  | + | 3-isopropylmalate dehydratase small subunit (EC 4.2.1.33)  | FIG00000282 | idu(1);Branched-Chain_Amino_Acid_Biosynthesis<br>idu(1);Leucine_Biosynthesis                                                                  |
| fig 6666666.28482.peg.1556 | Contig_144 | 3155 | 3796  | + | DNA-binding protein HU / low-complexity, AKP-rich domain   | FIG01296719 | isu;DNA_structural_proteins,_bacterial                                                                                                        |
| fig 6666666.28482.peg.1557 | Contig_144 | 4761 | 3862  | - | Possible hydrolase mutT1 (EC 3.-.-.)                       | FIG00544763 | ff                                                                                                                                            |
| fig 6666666.28482.peg.1558 | Contig_144 | 7044 | 4873  | - | Polyphosphate kinase (EC 2.7.4.1)                          | FIG00000504 | isu;Purine_conversions<br>isu;High_affinity_phosphate_transporter_and_control_of_PHO_regulon<br>isu;Polyphosphate<br>isu;Phosphate_metabolism |
| fig 6666666.28482.peg.1559 | Contig_144 | 7824 | 7168  | - | 2-phospho-L-lactate guanylyltransferase (EC 2.7.7.68)      | FIG01121259 | ff                                                                                                                                            |
| fig 6666666.28482.peg.1560 | Contig_144 | 7915 | 8934  | + | Glycerol-3-phosphate dehydrogenase [NAD(P)+] (EC 1.1.1.94) | FIG00000309 | idu(1);Glycerol_and_Glycerol-3-phosphate_Uptake_and_Utilization<br>idu(1);Glycerolipid_and_Glycerophospholipid_Metabolism_in_Bacteria         |
| fig 6666666.28482.peg.1561 | Contig_144 | 9014 | 10123 | + | D-alanine--D-alanine ligase (EC 6.3.2.4)                   | FIG00000350 | isu;Peptidoglycan_biosynthesis--gjo<br>isu;Peptidoglycan_Biosynthesis                                                                         |

|                            |            |       |       |   |                                                   |             |                                                                 |
|----------------------------|------------|-------|-------|---|---------------------------------------------------|-------------|-----------------------------------------------------------------|
| fig 6666666.28482.peg.1562 | Contig_144 | 10696 | 10124 | - | Possible membrane protein                         | FIG01121868 | ff                                                              |
| fig 6666666.28482.peg.1563 | Contig_144 | 10812 | 11774 | + | Thiamine-monophosphate kinase (EC 2.7.4.16)       | FIG00000570 | isu;Riboflavin_synthesis_cluster<br>isu;Thiamin_biosynthesis    |
| fig 6666666.28482.peg.1564 | Contig_144 | 11784 | 12074 | + | FIG00821587: hypothetical protein                 | FIG00821585 | ff                                                              |
| fig 6666666.28482.peg.1565 | Contig_144 | 12071 | 12754 | + | Uracil-DNA glycosylase, family 1                  | FIG00000538 | isu;DNA_Repair_Base_Excision<br>isu;Uracil-DNA_glycosylase      |
| fig 6666666.28482.peg.1566 | Contig_144 | 12751 | 13692 | + | Quinone oxidoreductase (EC 1.6.5.5)               | FIG00002982 | idu(7);Quinone_oxidoreductase_family                            |
| fig 6666666.28482.peg.1567 | Contig_144 | 13968 | 13774 | - | LSU ribosomal protein L28p                        | FIG00000266 | isu;Ribosome_LSU_bacterial                                      |
| fig 6666666.28482.peg.1568 | Contig_144 | 14216 | 15889 | + | Dihydroxyacetone kinase family protein            | FIG00042616 | isu;Glycerolipid_and_Glycerophospholipid_Metabolism_in_Bacteria |
| fig 6666666.28482.peg.1569 | Contig_144 | 15892 | 18132 | + | ATP-dependent DNA helicase RecG (EC 3.6.1.-)      | FIG00021289 | isu;DNA-replication                                             |
| fig 6666666.28482.peg.1570 | Contig_144 | 18129 | 18839 | + | Possible membrane protein                         | FIG01121868 | ff                                                              |
| fig 6666666.28482.peg.1571 | Contig_144 | 19700 | 18849 | - | 2,5-diketo-D-gluconic acid reductase (EC 1.1.1.-) | FIG01068018 | ff                                                              |
| fig 6666666.28482.peg.1572 | Contig_144 | 19954 | 21066 | + | lipase-esterase (lipN)                            | FIG01338277 | ff                                                              |
| fig 6666666.28482.peg.1573 | Contig_144 | 21142 | 21900 | + | POSSIBLE CONSERVED MEMBRANE OR SECRETED PROTEIN   | FIG01328650 | ff                                                              |
| fig 6666666.28482.peg.1574 | Contig_144 | 21897 | 22532 | + | Putative ESX-1 secretion system component Rv3877  | FIG00092051 | ff                                                              |

|                            |            |       |       |   |                                                              |             |                                                           |
|----------------------------|------------|-------|-------|---|--------------------------------------------------------------|-------------|-----------------------------------------------------------|
| fig 6666666.28482.peg.1575 | Contig_144 | 22537 | 23091 | + | Ribosomal RNA small subunit methyltransferase D (EC 2.1.1.-) | FIG00005547 | ff                                                        |
| fig 6666666.28482.peg.1576 | Contig_144 | 23169 | 23651 | + | Phosphopantetheine adenylyltransferase (EC 2.7.7.3)          | FIG00000261 | isu;CBSS-266117.6.peg.1260<br>isu;Coenzyme_A_Biosynthesis |
| fig 6666666.28482.peg.1577 | Contig_144 | 24852 | 23671 | - | PROBABLE INTEGRAL MEMBRANE PROTEIN                           | FIG01315135 | ff                                                        |
| fig 6666666.28482.peg.1578 | Contig_144 | 25205 | 25942 | + | Cell division initiation protein                             | FIG00534428 | ff                                                        |
| fig 6666666.28482.peg.1579 | Contig_144 | 26103 | 26699 | + | COG1399 protein, clustered with ribosomal protein L32p       | FIG01269488 | ff                                                        |
| fig 6666666.28482.peg.1580 | Contig_144 | 26696 | 27409 | + | Ribonuclease III (EC 3.1.26.3)                               | FIG00000208 | isu;RNA_processing_and_degradation,<br>bacterial          |
| fig 6666666.28482.peg.1581 | Contig_144 | 27426 | 28298 | + | Formamidopyrimidine-DNA glycosylase (EC 3.2.2.23)            | FIG00035634 | idu(3);DNA_Repair_Base_Excision                           |
| fig 6666666.28482.peg.1582 | Contig_144 | 29107 | 28331 | - | FIG00823221: hypothetical protein                            | FIG01311952 | ff                                                        |
| fig 6666666.28482.peg.1583 | Contig_144 | 29160 | 29582 | + | FIG00997866: hypothetical protein                            | FIG00820325 | ff                                                        |
| fig 6666666.28482.peg.1584 | Contig_144 | 31038 | 29542 | - | hypothetical protein                                         | FIG00638284 | ff                                                        |
| fig 6666666.28482.peg.1585 | Contig_146 | 43    | 1278  | + | PPE family protein                                           | FIG00013075 | idu(57);CBSS-164757.7.peg.5020                            |
| fig 6666666.28482.peg.1586 | Contig_146 | 2324  | 1284  | - | FIG019327: Probable conserved membrane protein               | FIG00019327 | ff                                                        |
| fig 6666666.28482.peg.1587 | Contig_146 | 3448  | 2324  | - | Phosphatidylinositol alpha-mannosyltransferase (EC 2.4.1.57) | FIG00005657 | ff                                                        |

|                            |            |       |       |   |                                                                                                        |             |                                                                                         |
|----------------------------|------------|-------|-------|---|--------------------------------------------------------------------------------------------------------|-------------|-----------------------------------------------------------------------------------------|
| fig 6666666.28482.peg.1588 | Contig_146 | 4422  | 3448  | - | Lauroyl/myristoyl acyltransferase involved in lipid A biosynthesis (Lauroyl/myristoyl acyltransferase) | FIG00006567 | ff                                                                                      |
| fig 6666666.28482.peg.1589 | Contig_146 | 5042  | 4419  | - | CDP-diacylglycerol--glycerol-3-phosphate 3-phosphatidyltransferase (EC 2.7.8.5)                        | FIG00001550 | idu(2);Glycerolipid_and_Glycerophospholipid_Metabolism_in_Bacteria                      |
| fig 6666666.28482.peg.1590 | Contig_146 | 5605  | 5048  | - | FIG049476: HIT family protein                                                                          | FIG00049476 | ff                                                                                      |
| fig 6666666.28482.peg.1591 | Contig_146 | 7652  | 5598  | - | Threonyl-tRNA synthetase (EC 6.1.1.3)                                                                  | FIG00000101 | isu;tRNA_aminoacylation,_Thr                                                            |
| fig 6666666.28482.peg.1592 | Contig_146 | 7692  | 7910  | + | hypothetical protein                                                                                   |             |                                                                                         |
| fig 6666666.28482.peg.1593 | Contig_146 | 8685  | 7918  | - | hypothetical protein                                                                                   | FIG00638284 | ff                                                                                      |
| fig 6666666.28482.peg.1594 | Contig_146 | 10132 | 8867  | - | N-acetyl-L,L-diaminopimelate deacetylase (EC 3.5.1.47)                                                 | FIG00016846 | isu;Lysine_Biosynthesis_DAP_Pathway,_GJO_scratch<br>isu;Lysine_Biosynthesis_DAP_Pathway |
| fig 6666666.28482.peg.1595 | Contig_146 | 10838 | 10125 | - | putative integral membrane protein                                                                     |             |                                                                                         |
| fig 6666666.28482.peg.1596 | Contig_146 | 11499 | 10876 | - | FIG00823977: hypothetical protein                                                                      | FIG00823976 | ff                                                                                      |
| fig 6666666.28482.peg.1597 | Contig_147 | 180   | 1121  | + | LpqP protein                                                                                           | FIG00825448 | ff                                                                                      |
| fig 6666666.28482.peg.1598 | Contig_147 | 1203  | 3806  | + | hypothetical protein                                                                                   | FIG00638284 | ff                                                                                      |
| fig 6666666.28482.peg.1599 | Contig_147 | 7121  | 3873  | - | Adenylate cyclase (EC 4.6.1.1) / Guanylate cyclase (EC 4.6.1.2)                                        | FIG00004786 | idu(25);cAMP_signaling_in_bacteria                                                      |
| fig 6666666.28482.peg.1600 | Contig_147 | 7787  | 7179  | - | Transcriptional regulator, TetR family                                                                 | FIG00554417 | ff                                                                                      |
| fig 6666666.28482.peg.1601 | Contig_147 | 7856  | 8686  | + | Oxidoreductase                                                                                         | FIG01321859 | ff                                                                                      |

|                            |            |       |      |   |                                                                                                                                         |             |                                                                                                                                                                                                                                                                                                                           |
|----------------------------|------------|-------|------|---|-----------------------------------------------------------------------------------------------------------------------------------------|-------------|---------------------------------------------------------------------------------------------------------------------------------------------------------------------------------------------------------------------------------------------------------------------------------------------------------------------------|
| fig 6666666.28482.peg.1602 | Contig_147 | 8723  | 9484 | + | FIG00825820:<br>hypothetical protein                                                                                                    | FIG00825815 | ff                                                                                                                                                                                                                                                                                                                        |
| fig 6666666.28482.peg.1603 | Contig_147 | 11035 | 9581 | - | hypothetical protein                                                                                                                    | FIG00638284 | ff                                                                                                                                                                                                                                                                                                                        |
| fig 6666666.28482.peg.1604 | Contig_148 | 103   | 1308 | + | DNA polymerase IV (EC 2.7.7.7)                                                                                                          | FIG00023943 | idu(1);DNA_repair,_bacterial                                                                                                                                                                                                                                                                                              |
| fig 6666666.28482.peg.1605 | Contig_148 | 1703  | 3625 | + | hypothetical protein                                                                                                                    | FIG00638284 | ff                                                                                                                                                                                                                                                                                                                        |
| fig 6666666.28482.peg.1606 | Contig_15  | 268   | 2142 | + | Serine/threonine protein kinase PrkC, regulator of stationary phase                                                                     | FIG00030191 | ff                                                                                                                                                                                                                                                                                                                        |
| fig 6666666.28482.peg.1607 | Contig_15  | 2818  | 2120 | - | Anthranilate synthase, amidotransferase component (EC 4.1.3.27) @ Para-aminobenzoate synthase, amidotransferase component (EC 2.6.1.85) | FIG00132685 | isu;Chorismate:_Intermediate_for_synthesis_of_Tryptophan,_PAPA_antibiotics,_PABA,_3-hydroxyanthranilate_and_more.<br>isu;Chorismate:_Intermediate_for_synthesis_of_Tryptophan,_PAPA_antibiotics,_PABA,_3-hydroxyanthranilate_and_more.<br>isu;Folate_Biosynthesis<br>isu;Tryptophan_synthesis<br>isu;Tryptophan_synthesis |
| fig 6666666.28482.peg.1608 | Contig_15  | 3601  | 2858 | - | FIG215594: Membrane spanning protein                                                                                                    | FIG00480581 | ff                                                                                                                                                                                                                                                                                                                        |
| fig 6666666.28482.peg.1609 | Contig_15  | 3722  | 4003 | + | FIG018426: putative septation inhibitor protein                                                                                         | FIG01124317 | ff                                                                                                                                                                                                                                                                                                                        |
| fig 6666666.28482.peg.1610 | Contig_15  | 4240  | 4584 | + | FIG020554: membrane protein                                                                                                             | FIG00666500 | icw(1);Peptidyl-prolyl_cis-trans_isomerase_containing_cluster                                                                                                                                                                                                                                                             |
| fig 6666666.28482.peg.1611 | Contig_15  | 5127  | 4597 | - | Peptidyl-prolyl cis-trans isomerase (EC 5.2.1.8)                                                                                        | FIG01955868 | idu(1);Peptidyl-prolyl_cis-trans_isomerase_containing_cluster                                                                                                                                                                                                                                                             |

|                            |           |       |       |   |                                                     |             |                                                                                                                                                              |
|----------------------------|-----------|-------|-------|---|-----------------------------------------------------|-------------|--------------------------------------------------------------------------------------------------------------------------------------------------------------|
| fig 6666666.28482.peg.1612 | Contig_15 | 5261  | 5692  | + | FIG024317: hypothetical protein                     | FIG01310638 | icw(2);Peptidyl-prolyl_cis-trans_isomerase_containing_cluster                                                                                                |
| fig 6666666.28482.peg.1613 | Contig_15 | 6910  | 5696  | - | putative cytochrome P450 hydroxylase                | FIG00032437 | idu(49);Nitric_oxide_synthase                                                                                                                                |
| fig 6666666.28482.peg.1614 | Contig_15 | 7107  | 7673  | + | Transcriptional regulator, TetR family              | FIG00628138 | ff                                                                                                                                                           |
| fig 6666666.28482.peg.1615 | Contig_15 | 7670  | 7888  | + | hypothetical protein                                |             |                                                                                                                                                              |
| fig 6666666.28482.peg.1616 | Contig_15 | 9164  | 7899  | - | PE-PGRS family protein                              |             | idu(16);PPE_gene_cluster_in_Mycobacteria                                                                                                                     |
| fig 6666666.28482.peg.1617 | Contig_15 | 9778  | 10077 | + | FIG018298: PE family protein                        |             | icw(1);PPE_gene_cluster_in_Mycobacteria                                                                                                                      |
| fig 6666666.28482.peg.1618 | Contig_15 | 10084 | 11247 | + | PPE family protein                                  | FIG00013075 | idu(57);CBSS-164757.7.peg.5020                                                                                                                               |
| fig 6666666.28482.peg.1619 | Contig_15 | 11485 | 11279 | - | putative long chain fatty acid-CoA synthetase Faa4p |             |                                                                                                                                                              |
| fig 6666666.28482.peg.1620 | Contig_15 | 12055 | 11942 | - | hypothetical protein                                |             |                                                                                                                                                              |
| fig 6666666.28482.rna.24   | Contig_15 | 12209 | 12137 | - | tRNA-Ala-TGC                                        |             |                                                                                                                                                              |
| fig 6666666.28482.rna.25   | Contig_15 | 12434 | 12361 | - | tRNA-Ile-GAT                                        |             |                                                                                                                                                              |
| fig 6666666.28482.peg.1621 | Contig_15 | 13474 | 12584 | - | FIG187021: hypothetical protein                     | FIG00735262 | icw(2);DNA_replication_cluster_1                                                                                                                             |
| fig 6666666.28482.peg.1622 | Contig_15 | 16107 | 13591 | - | DNA gyrase subunit A (EC 5.99.1.3)                  | FIG00000080 | icw(1);DNA_gyrase_subunits<br>icw(1);DNA_topoisomerases,_Type_II,_ATP-dependent<br>icw(1);DNA_replication_cluster_1<br>icw(1);Resistance_to_fluoroquinolones |

|                            |           |       |       |   |                                                                              |             |                                                                                                                                                           |
|----------------------------|-----------|-------|-------|---|------------------------------------------------------------------------------|-------------|-----------------------------------------------------------------------------------------------------------------------------------------------------------|
| fig 6666666.28482.peg.1623 | Contig_15 | 18180 | 16147 | - | DNA gyrase subunit B (EC 5.99.1.3)                                           | FIG00028203 | isu;DNA_gyrase_subunits<br>isu;DNA_topoisomerases,_Type_II,_A<br>TP-dependent<br>isu;DNA_replication_cluster_1<br>isu;Resistance_to_fluoroquinolones      |
| fig 6666666.28482.peg.1624 | Contig_15 | 18992 | 18435 | - | Zn-ribbon-containing, possibly RNA-binding protein and truncated derivatives | FIG00403940 | icw(3);DNA_replication_cluster_1                                                                                                                          |
| fig 6666666.28482.peg.1625 | Contig_15 | 20131 | 18989 | - | DNA recombination and repair protein RecF                                    | FIG00000412 | icw(5);DNA_replication_cluster_1                                                                                                                          |
| fig 6666666.28482.peg.1626 | Contig_15 | 21331 | 20132 | - | DNA polymerase III beta subunit (EC 2.7.7.7)                                 | FIG00066425 | icw(1);DNA-replication<br>icw(1);DNA_replication_cluster_1                                                                                                |
| fig 6666666.28482.peg.1627 | Contig_15 | 23369 | 21813 | - | Chromosomal replication initiator protein DnaA                               | FIG00000441 | isu;DNA-replication<br>icw(2);DNA_replication_cluster_1                                                                                                   |
| fig 6666666.28482.peg.1628 | Contig_15 | 23960 | 24103 | + | LSU ribosomal protein L34p                                                   | FIG00000471 | isu;Ribosome_LSU_bacterial<br>icw(3);RNA_modification_cluster                                                                                             |
| fig 6666666.28482.peg.1629 | Contig_15 | 24177 | 24482 | + | Ribonuclease P protein component (EC 3.1.26.5)                               | FIG00092649 | isu;tRNA_processing<br>icw(1);RNA_modification_cluster                                                                                                    |
| fig 6666666.28482.peg.1630 | Contig_15 | 24506 | 24835 | + | Protein YidD                                                                 | FIG00004843 | icw(2);RNA_modification_cluster<br>icw(2);Mycobacterium_virulence_op<br>eron_involved_in_an_unknown_func<br>tion_with_a_Jag_Protein_and_YidC_a<br>nd_YidD |

|                            |           |       |       |   |                                                                                               |             |                                                                                                                                                                                                                                                                                        |
|----------------------------|-----------|-------|-------|---|-----------------------------------------------------------------------------------------------|-------------|----------------------------------------------------------------------------------------------------------------------------------------------------------------------------------------------------------------------------------------------------------------------------------------|
| fig 6666666.28482.peg.1631 | Contig_15 | 24825 | 25949 | + | Inner membrane protein translocase component<br>YidC, long form                               | FIG00002818 | isu;CTP_synthase_(EC_6.3.4.2)_cluster<br>isu;RNA_modification_cluster<br>isu;Mycobacterium_virulence_operon_involved_in_an_unknown_function_with_a_Jag_Protein_and_YidC_and_YidD                                                                                                       |
| fig 6666666.28482.peg.1632 | Contig_15 | 26031 | 26618 | + | RNA-binding protein Jag                                                                       | FIG00001656 | icw(1);Mycobacterium_virulence_operon_involved_in_an_unknown_function_with_a_Jag_Protein_and_YidC_and_YidD                                                                                                                                                                             |
| fig 6666666.28482.peg.1633 | Contig_15 | 26676 | 27422 | + | rRNA small subunit 7-methylguanosine (m7G) methyltransferase GidB                             | FIG01089612 | isu;RNA_modification_and_chromosome_partitioning_cluster<br>isu;RNA_methylation                                                                                                                                                                                                        |
| fig 6666666.28482.peg.1634 | Contig_15 | 27419 | 28399 | + | Chromosome (plasmid) partitioning protein ParA / Sporulation initiation inhibitor protein Soj | FIG00006461 | icw(2);RNA_modification_and_chromosome_partitioning_cluster<br>idu(2);Bacterial_Cell_Division<br>idu(2);Ribosome_post-transcriptional_modification_and_chromosomal_segregation_cluster<br>icw(1);Bacterial_Cytoskeleton<br>icw(1);Bacterial_Cytoskeleton<br>icw(1);Plasmid_replication |
| fig 6666666.28482.peg.1635 | Contig_15 | 28423 | 29406 | + | Chromosome (plasmid) partitioning protein ParB / Stage 0 sporulation protein J                | FIG00021843 | icw(1);RNA_modification_and_chromosome_partitioning_cluster<br>isu;Bacterial_Cytoskeleton<br>isu;Bacterial_Cytoskeleton<br>isu;Plasmid_replication                                                                                                                                     |
| fig 6666666.28482.peg.1636 | Contig_15 | 29682 | 30434 | + | FIG007808: hypothetical protein                                                               | FIG00545451 | ff                                                                                                                                                                                                                                                                                     |

|                            |           |       |       |   |                                                         |             |                                                                                                                                                |
|----------------------------|-----------|-------|-------|---|---------------------------------------------------------|-------------|------------------------------------------------------------------------------------------------------------------------------------------------|
| fig 6666666.28482.peg.1637 | Contig_15 | 31651 | 30431 | - | N-acetylmuramoyl-L-alanine amidase (EC 3.5.1.28)        | FIG00001385 | isu;Murein_Hydrolases<br>isu;Recycling_of_Peptidoglycan_Amino_Acids                                                                            |
| fig 6666666.28482.peg.1638 | Contig_15 | 32137 | 31784 | - | Thioredoxin reductase (EC 1.8.1.9)                      | FIG00018396 | icw(1);pyrimidine_conversions<br>icw(1);Thioredoxin-disulfide_reductase<br>icw(1);Glycine_reductase,_sarcosine_reductase_and_betaine_reductase |
| fig 6666666.28482.peg.1639 | Contig_15 | 33141 | 32134 | - | Thioredoxin reductase (EC 1.8.1.9)                      | FIG00018396 | icw(1);pyrimidine_conversions<br>icw(1);Thioredoxin-disulfide_reductase<br>icw(1);Glycine_reductase,_sarcosine_reductase_and_betaine_reductase |
| fig 6666666.28482.peg.1640 | Contig_15 | 34051 | 33320 | - | FIG00999975:<br>hypothetical protein                    | FIG00822882 | ff                                                                                                                                             |
| fig 6666666.28482.peg.1641 | Contig_15 | 34655 | 34044 | - | RNA polymerase sigma-70 factor, ECF subfamily           | FIG00952839 | ff                                                                                                                                             |
| fig 6666666.28482.peg.1642 | Contig_15 | 38232 | 34729 | - | Proposed peptidoglycan lipid II flippase MurJ           | FIG00001204 | isu;Peptidoglycan_lipid_II_flippase                                                                                                            |
| fig 6666666.28482.peg.1643 | Contig_15 | 38323 | 38595 | + | hypothetical protein                                    | FIG01306568 | ff                                                                                                                                             |
| fig 6666666.28482.peg.1644 | Contig_15 | 38592 | 39620 | + | Mobile element protein                                  |             |                                                                                                                                                |
| fig 6666666.28482.peg.1645 | Contig_15 | 41998 | 39671 | - | hypothetical protein                                    | FIG01323436 | ff                                                                                                                                             |
| fig 6666666.28482.peg.1646 | Contig_15 | 42810 | 42055 | - | MutT/nudix family protein                               |             |                                                                                                                                                |
| fig 6666666.28482.peg.1647 | Contig_15 | 42901 | 44343 | + | tRNA nucleotidyltransferase (EC 2.7.7.21) (EC 2.7.7.25) | FIG00000289 | isu;Polyadenylation_bacterial<br>isu;tRNA_nucleotidyltransferase                                                                               |

|                            |           |       |       |   |                                                         |             |                                                                                                   |
|----------------------------|-----------|-------|-------|---|---------------------------------------------------------|-------------|---------------------------------------------------------------------------------------------------|
| fig 6666666.28482.peg.1648 | Contig_15 | 44894 | 44403 | - | hypothetical protein                                    |             |                                                                                                   |
| fig 6666666.28482.peg.1649 | Contig_15 | 44919 | 45863 | + | Antiactivator of flagellar biosynthesis FleN, an ATPase | FIG00825705 | ff                                                                                                |
| fig 6666666.28482.peg.1650 | Contig_15 | 45975 | 46622 | + | hypothetical protein                                    |             |                                                                                                   |
| fig 6666666.28482.peg.1651 | Contig_15 | 46619 | 48325 | + | hypothetical protein                                    | FIG00638284 | ff                                                                                                |
| fig 6666666.28482.peg.1652 | Contig_15 | 48458 | 48589 | + | hypothetical protein                                    |             |                                                                                                   |
| fig 6666666.28482.peg.1653 | Contig_15 | 48723 | 49397 | + | PROBABLE CONSERVED MEMBRANE PROTEIN                     | FIG00662487 | ff                                                                                                |
| fig 6666666.28482.peg.1654 | Contig_15 | 49763 | 49413 | - | WhiB-type transcription regulator                       | FIG00019991 | idu(2);WhiB_and_WhiB-type_regulatory_proteins_                                                    |
| fig 6666666.28482.peg.1655 | Contig_15 | 50894 | 50232 | - | Phosphate transport system regulatory protein PhoU      | FIG00104848 | idu(3);High_affinity_phosphate_transporter_and_control_of_PHO_regulon idu(3);Phosphate_metabolism |
| fig 6666666.28482.peg.1656 | Contig_15 | 51510 | 51046 | - | FIG00822575: hypothetical protein                       | FIG00822574 | ff                                                                                                |
| fig 6666666.28482.peg.1657 | Contig_15 | 52360 | 51512 | - | FIG00822859: hypothetical protein                       | FIG00822857 | ff                                                                                                |
| fig 6666666.28482.peg.1658 | Contig_15 | 52471 | 53346 | + | RNA polymerase sigma-70 factor                          | FIG01303902 | idu(4);CBSS-313593.3.peg.2729 idu(4);Transcription_initiation,_bacterial_sigma_factors            |
| fig 6666666.28482.peg.1659 | Contig_15 | 54089 | 53343 | - | Antiactivator of flagellar biosynthesis FleN, an ATPase | FIG00825705 | ff                                                                                                |
| fig 6666666.28482.peg.1660 | Contig_15 | 56101 | 54902 | - | NADH:flavin oxidoreductases, Old Yellow Enzyme family   | FIG01338127 | ff                                                                                                |

|                            |            |       |       |   |                                                                                                                     |             |                                                                                                                                                         |
|----------------------------|------------|-------|-------|---|---------------------------------------------------------------------------------------------------------------------|-------------|---------------------------------------------------------------------------------------------------------------------------------------------------------|
| fig 6666666.28482.peg.1661 | Contig_15  | 56159 | 57007 | + | Methylenetetrahydrofolate dehydrogenase (NADP+) (EC 1.5.1.5) / Methenyltetrahydrofolate cyclohydrolase (EC 3.5.4.9) | FIG00000105 | isu;One-carbon_metabolism_by_tetrahydropterines isu;One-carbon_metabolism_by_tetrahydropterines isu;Serine-glyoxylate_cycle isu;Serine-glyoxylate_cycle |
| fig 6666666.28482.peg.1662 | Contig_15  | 57011 | 57286 | + | hypothetical protein                                                                                                | FIG00638284 | ff                                                                                                                                                      |
| fig 6666666.28482.peg.1663 | Contig_15  | 57899 | 57459 | - | hypothetical protein                                                                                                | FIG00638284 | ff                                                                                                                                                      |
| fig 6666666.28482.peg.1664 | Contig_15  | 58160 | 59629 | + | probable oxidoreductase                                                                                             | FIG01124638 | ff                                                                                                                                                      |
| fig 6666666.28482.peg.1665 | Contig_15  | 59629 | 60009 | + | Glyoxalase family protein                                                                                           | FIG00007915 | ff                                                                                                                                                      |
| fig 6666666.28482.peg.1666 | Contig_150 | 152   | 814   | + | PROBABLE CONSERVED TRANSMEMBRANE PROTEIN                                                                            | FIG00662132 | ff                                                                                                                                                      |
| fig 6666666.28482.peg.1667 | Contig_150 | 819   | 1643  | + | Glycerophosphoryl diester phosphodiesterase (EC 3.1.4.46)                                                           | FIG00002239 | idu(1);Glycerol_and_Glycerol-3-phosphate_Uptake_and_Utilization idu(1);CBSS-176299.4.peg.1996A                                                          |
| fig 6666666.28482.peg.1668 | Contig_150 | 2507  | 1644  | - | Cell envelope-associated transcriptional attenuator LytR-CpsA-Psr, subfamily A1 (as in PMID19099556)                | FIG00025213 | idu(3);Cell_envelope-associated_LytR-CpsA-Psr_transcriptional_attenuators                                                                               |
| fig 6666666.28482.peg.1669 | Contig_151 | 1303  | 131   | - | Acetylornithine aminotransferase (EC 2.6.1.11)                                                                      | FIG00001168 | icw(3);Arginine_Biosynthesis_--_gjo icw(3);Arginine_Biosynthesis_extended                                                                               |

|                            |            |      |      |   |                                                                                                                                             |             |                                                                                                                                                                                                                                                                                                     |
|----------------------------|------------|------|------|---|---------------------------------------------------------------------------------------------------------------------------------------------|-------------|-----------------------------------------------------------------------------------------------------------------------------------------------------------------------------------------------------------------------------------------------------------------------------------------------------|
| fig 6666666.28482.peg.1670 | Contig_151 | 2205 | 1318 | - | Acetylglutamate kinase (EC 2.7.2.8)                                                                                                         | FIG00000383 | icw(1);Arginine_Biosynthesis_--_gjo<br>icw(1);Arginine_Biosynthesis_extended                                                                                                                                                                                                                        |
| fig 6666666.28482.peg.1671 | Contig_151 | 3416 | 2202 | - | Glutamate N-acetyltransferase (EC 2.3.1.35) / N-acetylglutamate synthase (EC 2.3.1.1)                                                       | FIG00000630 | isu;Arginine_Biosynthesis_--_gjo<br>icw(1);Arginine_Biosynthesis_--_gjo<br>isu;Arginine_Biosynthesis_extended<br>icw(1);Arginine_Biosynthesis_extended                                                                                                                                              |
| fig 6666666.28482.peg.1672 | Contig_151 | 4456 | 3413 | - | N-acetyl-gamma-glutamyl-phosphate reductase (EC 1.2.1.38)                                                                                   | FIG00000358 | icw(2);Arginine_Biosynthesis_--_gjo<br>icw(2);Arginine_Biosynthesis_extended                                                                                                                                                                                                                        |
| fig 6666666.28482.peg.1673 | Contig_151 | 5307 | 4606 | - | hypothetical protein                                                                                                                        |             |                                                                                                                                                                                                                                                                                                     |
| fig 6666666.28482.peg.1674 | Contig_153 | 982  | 47   | - | PPE family protein                                                                                                                          | FIG00013075 | idu(57);CBSS-164757.7.peg.5020                                                                                                                                                                                                                                                                      |
| fig 6666666.28482.peg.1675 | Contig_153 | 2636 | 1041 | - | hypothetical protein                                                                                                                        | FIG00638284 | ff                                                                                                                                                                                                                                                                                                  |
| fig 6666666.28482.peg.1676 | Contig_153 | 3389 | 2880 | - | Ubiquinone/menaquinone biosynthesis methyltransferase UbiE (EC 2.1.1.-) @ 2-heptaprenyl-1,4-naphthoquinone methyltransferase (EC 2.1.1.163) | FIG00006851 | isu;Menaquinone_and_Phylloquinone_Biosynthesis_--_gjo<br>isu;Menaquinone_and_Phylloquinone_Biosynthesis<br>isu;Menaquinone_and_Phylloquinone_Biosynthesis<br>isu;Menaquinone_Biosynthesis_via_Futalosine_--_gjo<br>idu(2);Menaquinone_Biosynthesis_via_Futalosine<br>idu(2);Ubiquinone_Biosynthesis |
| fig 6666666.28482.peg.1677 | Contig_153 | 4120 | 3506 | - | FIG00820129:<br>hypothetical protein                                                                                                        | FIG01359873 | ff                                                                                                                                                                                                                                                                                                  |
| fig 6666666.28482.peg.1678 | Contig_153 | 5322 | 4117 | - | FIG00826834:<br>hypothetical protein                                                                                                        | FIG00826832 | ff                                                                                                                                                                                                                                                                                                  |

|                            |            |      |      |   |                                                               |             |                                                                                                                                                                                                                                               |
|----------------------------|------------|------|------|---|---------------------------------------------------------------|-------------|-----------------------------------------------------------------------------------------------------------------------------------------------------------------------------------------------------------------------------------------------|
| fig 6666666.28482.peg.1679 | Contig_153 | 6252 | 5368 | - | Short-chain dehydrogenase/reductase SDR                       | FIG00546160 | idu(13);CBSS-164757.7.peg.5020<br>idu(13);Transcription_repair_cluster                                                                                                                                                                        |
| fig 6666666.28482.peg.1680 | Contig_153 | 6810 | 7619 | + | RNA polymerase sigma factor SigB                              | FIG00132885 | idu(2);SigmaB_stress_responce_regulation<br>idu(2);Biofilm_formation_in_Staphylococcus idu(2);Sigma-B_stress_response_cluster_1<br>idu(2);Transcription_initiation,_bacterial_sigma_factors<br>idu(2);Methicillin_resistance_in_Staphylococci |
| fig 6666666.28482.peg.1681 | Contig_153 | 7736 | 8362 | + | FIG00825727: hypothetical protein                             | FIG00825726 | ff                                                                                                                                                                                                                                            |
| fig 6666666.28482.peg.1682 | Contig_153 | 9985 | 8699 | - | Nitrate reductase [NADH] (EC 1.7.1.1)                         | FIG01357562 | ff                                                                                                                                                                                                                                            |
| fig 6666666.28482.peg.1683 | Contig_155 | 1232 | 21   | - | Mobile element protein                                        | FIG01306568 | ff                                                                                                                                                                                                                                            |
| fig 6666666.28482.peg.1684 | Contig_156 | 43   | 1050 | + | MCE-family lipoprotein LprK (MCE-family lipoprotein Mce1e)    | FIG00819998 | icw(3);Mycobacterium_virulence_operon_MCE_involved_in_cell_invasion                                                                                                                                                                           |
| fig 6666666.28482.peg.1685 | Contig_156 | 1044 | 2594 | + | MCE-family protein Mce1F                                      | FIG00821171 | icw(1);Mycobacterium_virulence_operon_MCE_involved_in_cell_invasion                                                                                                                                                                           |
| fig 6666666.28482.peg.1686 | Contig_156 | 2606 | 3373 | + | FIG033430: Probable conserved MCE associated membrane protein | FIG01306442 | icw(2);Mycobacterium_virulence_operon_MCE_involved_in_cell_invasion                                                                                                                                                                           |
| fig 6666666.28482.peg.1687 | Contig_156 | 3370 | 4356 | + | FIG033285: Conserved MCE associated transmembrane protein     | FIG00821527 | icw(4);Mycobacterium_virulence_operon_MCE_involved_in_cell_invasion                                                                                                                                                                           |

|                            |            |       |       |   |                                                               |             |                                                                         |
|----------------------------|------------|-------|-------|---|---------------------------------------------------------------|-------------|-------------------------------------------------------------------------|
| fig 6666666.28482.peg.1688 | Contig_156 | 4353  | 4907  | + | FIG034772: Probable conserved MCE associated protein          | FIG00821709 | icw(5);Mycobacterium_virulence_op<br>eron_MCE_involved_in_cell_invasion |
| fig 6666666.28482.peg.1689 | Contig_156 | 4874  | 5608  | + | FIG030769: Probable conserved MCE associated membrane protein | FIG01306441 | isu;Mycobacterium_virulence_opero<br>n_MCE_involved_in_cell_invasion    |
| fig 6666666.28482.peg.1690 | Contig_156 | 5632  | 6321  | + | membrane protein, putative                                    | FIG01288841 | ff                                                                      |
| fig 6666666.28482.peg.1691 | Contig_156 | 7396  | 6314  | - | Possible lipoprotein LprO                                     | FIG00823768 | ff                                                                      |
| fig 6666666.28482.peg.1692 | Contig_156 | 8855  | 7503  | - | Possible membrane protein                                     | FIG01121868 | ff                                                                      |
| fig 6666666.28482.peg.1693 | Contig_156 | 9694  | 8969  | - | Pirin                                                         | FIG01319925 | ff                                                                      |
| fig 6666666.28482.peg.1694 | Contig_156 | 10559 | 9705  | - | Transcriptional regulator, lclR family                        | FIG00022569 | idu(12);Homogentisate_pathway_of_<br>aromatic_compound_degradation      |
| fig 6666666.28482.peg.1695 | Contig_156 | 10656 | 11765 | + | FIG00824416: hypothetical protein                             | FIG00824413 | ff                                                                      |
| fig 6666666.28482.peg.1696 | Contig_156 | 12677 | 11742 | - | Permease of the drug/metabolite transporter (DMT) superfamily | FIG00846773 | ff                                                                      |
| fig 6666666.28482.peg.1697 | Contig_156 | 12836 | 13687 | + | LysR                                                          | FIG01414472 | ff                                                                      |
| fig 6666666.28482.peg.1698 | Contig_156 | 15103 | 13697 | - | FIG00825281: hypothetical protein                             | FIG00825280 | ff                                                                      |
| fig 6666666.28482.peg.1699 | Contig_156 | 16101 | 15100 | - | RNA polymerase factor sigma-70                                | FIG00820006 | ff                                                                      |
| fig 6666666.28482.peg.1700 | Contig_156 | 16197 | 17036 | + | Monoglyceride lipase (EC 3.1.1.23)                            | FIG01303922 | isu;Triacylglycerol_metabolism                                          |
| fig 6666666.28482.peg.1701 | Contig_157 | 308   | 736   | + | Chromosome partition protein smc                              | FIG00026918 | isu;DNA_structural_proteins,_bacteri<br>al                              |

|                            |            |      |       |   |                                                                                    |             |                                                                                   |
|----------------------------|------------|------|-------|---|------------------------------------------------------------------------------------|-------------|-----------------------------------------------------------------------------------|
| fig 6666666.28482.peg.1702 | Contig_159 | 69   | 311   | + | PE-PGRS family protein                                                             |             | idu(16);PPE_gene_cluster_in_Mycobacteria                                          |
| fig 6666666.28482.peg.1703 | Contig_159 | 910  | 398   | - | Membrane protein 2, distant similarity to thiosulphate:quinone oxidoreductase DoxD | FIG00006938 | ff                                                                                |
| fig 6666666.28482.peg.1704 | Contig_159 | 1185 | 2681  | + | Pyruvate,phosphate dikinase (EC 2.7.9.1)                                           | FIG00001076 | isu;Pyruvate_metabolism_I:_anaplerotic_reactions,_PEP                             |
| fig 6666666.28482.peg.1705 | Contig_159 | 2678 | 3292  | + | FIG00823918: hypothetical protein                                                  | FIG00823917 | ff                                                                                |
| fig 6666666.28482.peg.1706 | Contig_159 | 4540 | 3296  | - | FIG028963: hypothetical protein                                                    | FIG00823859 | ff                                                                                |
| fig 6666666.28482.peg.1707 | Contig_159 | 5458 | 4553  | - | Probable epoxide hydrolase ephC (EC 3.3.2.9)                                       | FIG01350511 | ff                                                                                |
| fig 6666666.28482.peg.1708 | Contig_159 | 6086 | 5604  | - | 3-demethylubiquinone-9 3-methyltransferase                                         | FIG01311947 | ff                                                                                |
| fig 6666666.28482.peg.1709 | Contig_159 | 6223 | 7092  | + | Possible peroxidase bpoB (Non-haem peroxidase) (EC 1.11.1.-)                       | FIG01316813 | ff                                                                                |
| fig 6666666.28482.peg.1710 | Contig_159 | 8111 | 7089  | - | 6-phosphogluconate dehydrogenase, decarboxylating (EC 1.1.1.44)                    | FIG00000405 | icw(1);Pentose_phosphate_pathway idu(1);D-gluconate_and_ketogluconates_metabolism |
| fig 6666666.28482.peg.1711 | Contig_159 | 9533 | 8124  | - | Glucose-6-phosphate 1-dehydrogenase (EC 1.1.1.49)                                  | FIG00000332 | idu(1);Pentose_phosphate_pathway                                                  |
| fig 6666666.28482.peg.1712 | Contig_159 | 9646 | 10470 | + | Putative adenylate/guanylate cyclase                                               | FIG01409435 | ff                                                                                |

|                            |            |       |       |   |                                                                                    |             |                                            |
|----------------------------|------------|-------|-------|---|------------------------------------------------------------------------------------|-------------|--------------------------------------------|
| fig 6666666.28482.peg.1713 | Contig_159 | 10631 | 10422 | - | FIG00820811:<br>hypothetical protein                                               | FIG00820810 | ff                                         |
| fig 6666666.28482.peg.1714 | Contig_159 | 10727 | 11407 | + | FIG022780: hypothetical<br>protein                                                 | FIG00827818 | ff                                         |
| fig 6666666.28482.peg.1715 | Contig_159 | 11763 | 11404 | - | FIG00822251:<br>hypothetical protein                                               | FIG00822249 | ff                                         |
| fig 6666666.28482.peg.1716 | Contig_16  | 816   | 526   | - | SSU ribosomal protein<br>S6p                                                       | FIG00000170 | ff                                         |
| fig 6666666.28482.peg.1717 | Contig_16  | 1585  | 944   | - | ThiJ/Pfpl family protein                                                           | FIG00015923 | idu(8);CBSS-176280.1.peg.1561              |
| fig 6666666.28482.peg.1718 | Contig_16  | 3308  | 1662  | - | Multimodular<br>transpeptidase-<br>transglycosylase (EC<br>2.4.1.129) (EC 3.4.-.-) | FIG00000011 | icw(1);Peptidoglycan_Biosynthesis          |
| fig 6666666.28482.peg.1719 | Contig_16  | 5860  | 3305  | - | Multimodular<br>transpeptidase-<br>transglycosylase (EC<br>2.4.1.129) (EC 3.4.-.-) | FIG00000011 | icw(1);Peptidoglycan_Biosynthesis          |
| fig 6666666.28482.peg.1720 | Contig_16  | 6323  | 5916  | - | FIG00822203:<br>hypothetical protein                                               | FIG00822202 | ff                                         |
| fig 6666666.28482.peg.1721 | Contig_16  | 6356  | 7369  | + | Possible membrane<br>protein                                                       | FIG01121868 | ff                                         |
| fig 6666666.28482.peg.1722 | Contig_16  | 7542  | 8084  | + | Transcriptional regulator,<br>PadR family                                          | FIG00002474 | idu(4);CBSS-1352.1.peg.856                 |
| fig 6666666.28482.peg.1723 | Contig_16  | 8151  | 9257  | + | Inositol-1-phosphate<br>synthase (EC 5.5.1.4)                                      | FIG00066508 | isu;Di-Inositol-<br>Phosphate_biosynthesis |
| fig 6666666.28482.peg.1724 | Contig_16  | 9449  | 10375 | + | Hydrolase                                                                          | FIG00801965 | ff                                         |
| fig 6666666.28482.peg.1725 | Contig_16  | 10444 | 11238 | + | Possible oxidoreductase                                                            | FIG00553614 | ff                                         |
| fig 6666666.28482.peg.1726 | Contig_16  | 11370 | 12110 | + | Transcriptional regulator,<br>GntR family                                          | FIG00621925 | ff                                         |

|                            |           |       |       |   |                                                                                                 |             |                              |
|----------------------------|-----------|-------|-------|---|-------------------------------------------------------------------------------------------------|-------------|------------------------------|
| fig 6666666.28482.peg.1727 | Contig_16 | 12160 | 13965 | + | Amino acid ABC transporter, permease protein, 3-TM region, His/Glu/Gln/Arg/opine family protein | FIG01373972 | ff                           |
| fig 6666666.28482.peg.1728 | Contig_16 | 13962 | 14711 | + | Amino acid ABC transporter, ATP-binding protein                                                 | FIG00519964 | ff                           |
| fig 6666666.28482.peg.1729 | Contig_16 | 14778 | 15275 | + | Transcriptional regulator, MarR family                                                          | FIG00554610 | ff                           |
| fig 6666666.28482.peg.1730 | Contig_16 | 15317 | 15997 | + | Short chain dehydrogenase                                                                       | FIG01310822 | ff                           |
| fig 6666666.28482.peg.1731 | Contig_16 | 18887 | 15981 | - | Leucyl-tRNA synthetase (EC 6.1.1.4)                                                             | FIG00000114 | isu;tRNA_aminoacylation,_Leu |
| fig 6666666.28482.peg.1732 | Contig_16 | 19073 | 20167 | + | Proline-rich 28 kDa antigen                                                                     | FIG01257277 | ff                           |
| fig 6666666.28482.peg.1733 | Contig_16 | 20236 | 20586 | + | hypothetical protein                                                                            |             |                              |
| fig 6666666.28482.peg.1734 | Contig_16 | 20609 | 21631 | + | hypothetical protein                                                                            |             |                              |
| fig 6666666.28482.peg.1735 | Contig_16 | 22230 | 21628 | - | FIG00996838: hypothetical protein                                                               | FIG00821672 | ff                           |
| fig 6666666.28482.peg.1736 | Contig_16 | 22339 | 23646 | + | Possible membrane protein                                                                       | FIG01121868 | ff                           |
| fig 6666666.28482.peg.1737 | Contig_16 | 23656 | 24429 | + | FIG00822256: hypothetical protein                                                               | FIG00822255 | ff                           |
| fig 6666666.28482.peg.1738 | Contig_16 | 25801 | 24542 | - | FIG00821436: hypothetical protein                                                               | FIG00821434 | ff                           |
| fig 6666666.28482.peg.1739 | Contig_16 | 25884 | 26027 | + | FIG00820102: hypothetical protein                                                               | FIG00820096 | ff                           |
| fig 6666666.28482.peg.1740 | Contig_16 | 26274 | 26041 | - | FIG00820005: hypothetical protein                                                               | FIG00820004 | ff                           |
| fig 6666666.28482.peg.1741 | Contig_16 | 26666 | 26349 | - | FIG00822329: hypothetical protein                                                               | FIG00822322 | ff                           |

|                            |            |       |       |   |                                                                                        |             |                               |
|----------------------------|------------|-------|-------|---|----------------------------------------------------------------------------------------|-------------|-------------------------------|
| fig 6666666.28482.peg.1742 | Contig_16  | 28095 | 26719 | - | FIG00821131:<br>hypothetical protein                                                   | FIG00821130 | ff                            |
| fig 6666666.28482.peg.1743 | Contig_16  | 28537 | 28199 | - | hypothetical protein                                                                   |             |                               |
| fig 6666666.28482.peg.1744 | Contig_16  | 29365 | 28580 | - | NlpC/P60 family, cell wall-<br>associated hydrolase,<br>invasion-associated<br>protein | FIG01316122 | ff                            |
| fig 6666666.28482.peg.1745 | Contig_16  | 30126 | 29362 | - | Transcriptional<br>regulatory protein                                                  | FIG00447785 | ff                            |
| fig 6666666.28482.peg.1746 | Contig_16  | 30273 | 30689 | + | WhiB family<br>transcriptional regulator                                               | FIG01310014 | ff                            |
| fig 6666666.28482.peg.1747 | Contig_16  | 30761 | 32143 | + | Acyl-CoA dehydrogenase                                                                 | FIG01471012 | ff                            |
| fig 6666666.28482.peg.1748 | Contig_16  | 32172 | 33143 | + | FIG00821582:<br>hypothetical protein                                                   | FIG00821581 | ff                            |
| fig 6666666.28482.peg.1749 | Contig_16  | 33140 | 33457 | + | FIG00825846:<br>hypothetical protein                                                   | FIG00825845 | ff                            |
| fig 6666666.28482.peg.1750 | Contig_16  | 33693 | 33454 | - | FIG00314463:<br>hypothetical protein                                                   | FIG01845904 | ff                            |
| fig 6666666.28482.peg.1751 | Contig_16  | 33763 | 34116 | + | FIG00828522:<br>hypothetical protein                                                   | FIG00828517 | ff                            |
| fig 6666666.28482.peg.1752 | Contig_16  | 34139 | 34627 | + | glutathione peroxidase<br>family protein(<br>EC:1.11.1.12,EC:1.11.1.9<br>)             |             |                               |
| fig 6666666.28482.rna.26   | Contig_16  | 34781 | 34699 | - | tRNA-Leu-CAG                                                                           |             | isu;tRNAs                     |
| fig 6666666.28482.peg.1753 | Contig_160 | 1820  | 708   | - | Trehalose-6-phosphate<br>phosphatase (EC<br>3.1.3.12)                                  | FIG00001349 | idu(1);Trehalose_Biosynthesis |

|                            |            |      |      |   |                                                            |             |                                                                                                                                                              |
|----------------------------|------------|------|------|---|------------------------------------------------------------|-------------|--------------------------------------------------------------------------------------------------------------------------------------------------------------|
| fig 6666666.28482.peg.1754 | Contig_160 | 3178 | 1862 | - | Wax ester synthase/acyl-CoA:diacylglycerol acyltransferase | FIG01309728 | ff                                                                                                                                                           |
| fig 6666666.28482.peg.1755 | Contig_160 | 3383 | 6628 | + | DNA polymerase III alpha subunit (EC 2.7.7.7)              | FIG00041038 | idu(1);DNA-replication idu(1);CBSS-350688.3.peg.1509                                                                                                         |
| fig 6666666.28482.peg.1756 | Contig_160 | 6775 | 7113 | + | conserved hypothetical secreted protein                    |             |                                                                                                                                                              |
| fig 6666666.28482.peg.1757 | Contig_160 | 7533 | 7123 | - | FIG00820233: hypothetical protein                          | FIG00820230 | ff                                                                                                                                                           |
| fig 6666666.28482.peg.1758 | Contig_161 | 3294 | 1954 | - | Glutamine synthetase type I (EC 6.3.1.2)                   | FIG00134889 | idu(2);Glutamine,_Glutamate,_Aspartate_and_Aspargine_Biosynthesis idu(2);Ammonia_assimilation idu(2);Glutamine_synthetases idu(2);Peptidoglycan_Biosynthesis |
| fig 6666666.28482.peg.1759 | Contig_162 | 275  | 1486 | + | Mobile element protein                                     | FIG01306568 | ff                                                                                                                                                           |
| fig 6666666.28482.peg.1760 | Contig_163 | 575  | 90   | - | FIG00821384: hypothetical protein                          | FIG00821383 | ff                                                                                                                                                           |
| fig 6666666.28482.peg.1761 | Contig_164 | 26   | 958  | + | Mobile element protein                                     | FIG01306568 | ff                                                                                                                                                           |
| fig 6666666.28482.peg.1762 | Contig_165 | 194  | 1333 | + | Mobile element protein                                     | FIG01306568 | ff                                                                                                                                                           |
| fig 6666666.28482.peg.1763 | Contig_166 | 246  | 1328 | + | Mobile element protein                                     | FIG01306568 | ff                                                                                                                                                           |
| fig 6666666.28482.peg.1764 | Contig_167 | 1361 | 1047 | - | Proline and threonine rich protein                         | FIG00825745 | ff                                                                                                                                                           |

|                            |            |       |       |   |                                                                                                                    |             |                                                                                                                                                                                                                                                   |
|----------------------------|------------|-------|-------|---|--------------------------------------------------------------------------------------------------------------------|-------------|---------------------------------------------------------------------------------------------------------------------------------------------------------------------------------------------------------------------------------------------------|
| fig 6666666.28482.peg.1765 | Contig_169 | 1278  | 709   | - | Phosphoheptose isomerase (EC 5.3.1.-)                                                                              | FIG00000620 | isu;LOS_core_oligosaccharide_biosynthesis<br>isu;Capsular_heptose_biosynthesis                                                                                                                                                                    |
| fig 6666666.28482.peg.1766 | Contig_169 | 2270  | 1275  | - | hypothetical protein                                                                                               |             |                                                                                                                                                                                                                                                   |
| fig 6666666.28482.peg.1767 | Contig_169 | 2794  | 2279  | - | D-glycero-D-manno-heptose 1,7-bisphosphate phosphatase (EC 3.1.1.-); possible Histidinol-phosphatase (EC 3.1.3.15) | FIG01407672 | icw(1);LOS_core_oligosaccharide_biosynthesis<br>icw(1);Capsular_heptose_biosynthesis                                                                                                                                                              |
| fig 6666666.28482.peg.1768 | Contig_17  | 48    | 7805  | + | FIG00820660: hypothetical protein                                                                                  | FIG00820658 | ff                                                                                                                                                                                                                                                |
| fig 6666666.28482.peg.1769 | Contig_17  | 7890  | 9545  | + | 3-ketoacyl-CoA thiolase                                                                                            | FIG00825273 | ff                                                                                                                                                                                                                                                |
| fig 6666666.28482.peg.1770 | Contig_17  | 9542  | 10429 | + | FIG00824394: hypothetical protein                                                                                  | FIG00824393 | ff                                                                                                                                                                                                                                                |
| fig 6666666.28482.peg.1771 | Contig_17  | 10429 | 11244 | + | FIG00446426: hypothetical protein                                                                                  | FIG00446425 | ff                                                                                                                                                                                                                                                |
| fig 6666666.28482.peg.1772 | Contig_17  | 11283 | 12041 | + | 2-hydroxy-3-oxopropionate reductase (EC 1.1.1.60)                                                                  | FIG00133229 | idu(1);Glycerate_metabolism<br>idu(1);Allantoin_Utilization<br>idu(1);Photorespiration_(oxidative_C2_cycle)<br>idu(1);D-galactarate,_D-glucarate_and_D-glycerate_catabolism<br>idu(1);D-galactarate,_D-glucarate_and_D-glycerate_catabolism_-_gjo |
| fig 6666666.28482.peg.1773 | Contig_17  | 12147 | 13352 | + | putative cytochrome P450 hydroxylase                                                                               | FIG00032437 | idu(49);Nitric_oxide_synthase                                                                                                                                                                                                                     |
| fig 6666666.28482.peg.1774 | Contig_17  | 13364 | 13564 | + | Probable Ferredoxin FdxD                                                                                           | FIG01446880 | ff                                                                                                                                                                                                                                                |

|                            |           |       |       |   |                                                                                             |             |                                                                                                                                                                                                                                                                                                                                                                                                                                                                                                                                                                                                                                                  |
|----------------------------|-----------|-------|-------|---|---------------------------------------------------------------------------------------------|-------------|--------------------------------------------------------------------------------------------------------------------------------------------------------------------------------------------------------------------------------------------------------------------------------------------------------------------------------------------------------------------------------------------------------------------------------------------------------------------------------------------------------------------------------------------------------------------------------------------------------------------------------------------------|
| fig 6666666.28482.peg.1775 | Contig_17 | 13857 | 13561 | - | FIG00820944:<br>hypothetical protein                                                        | FIG00820941 | ff                                                                                                                                                                                                                                                                                                                                                                                                                                                                                                                                                                                                                                               |
| fig 6666666.28482.peg.1776 | Contig_17 | 14056 | 13850 | - | fdxD-related protein                                                                        | FIG01419919 | ff                                                                                                                                                                                                                                                                                                                                                                                                                                                                                                                                                                                                                                               |
| fig 6666666.28482.peg.1777 | Contig_17 | 15333 | 14053 | - | cytochrome p450 107b1                                                                       | FIG00825630 | ff                                                                                                                                                                                                                                                                                                                                                                                                                                                                                                                                                                                                                                               |
| fig 6666666.28482.peg.1778 | Contig_17 | 15975 | 15448 | - | FIG00824107:<br>hypothetical protein                                                        | FIG00824106 | ff                                                                                                                                                                                                                                                                                                                                                                                                                                                                                                                                                                                                                                               |
| fig 6666666.28482.peg.1779 | Contig_17 | 16586 | 15972 | - | Transcriptional regulator,<br>TetR family                                                   | FIG00554417 | ff                                                                                                                                                                                                                                                                                                                                                                                                                                                                                                                                                                                                                                               |
| fig 6666666.28482.peg.1780 | Contig_17 | 17836 | 16691 | - | 3-ketoacyl-CoA thiolase<br>(EC 2.3.1.16) @ Acetyl-<br>CoA acetyltransferase (EC<br>2.3.1.9) | FIG00000004 | idu(11);CBSS-246196.1.peg.364<br>idu(9);Serine-glyoxylate_cycle<br>idu(11);Serine-glyoxylate_cycle<br>icw(1);n-<br>Phenylalkanoic_acid_degradation<br>idu(9);Ethylmalonyl-<br>CoA_pathway_of_C2_assimilation,_G<br>JO<br>idu(9);Polyhydroxybutyrate_metaboli<br>sm<br>icw(1);Polyhydroxybutyrate_metaboli<br>sm icw(2);Isoleucine_degradation<br>icw(1);Fatty_acid_metabolism_cluste<br>r idu(11);Biotin_synthesis_cluster<br>idu(11);Biotin_biosynthesis<br>icw(2);Lysine_fermentation<br>idu(9);Isoprenoid_Biosynthesis<br>icw(2);Butanol_Biosynthesis<br>icw(2);Acetyl-<br>CoA_fermentation_to_Butyrate<br>icw(1);Butyrate_metabolism_cluster |

|                            |           |       |       |   |                                                                                                  |             |                                                                                                                                                                                                                                                                                                                                             |
|----------------------------|-----------|-------|-------|---|--------------------------------------------------------------------------------------------------|-------------|---------------------------------------------------------------------------------------------------------------------------------------------------------------------------------------------------------------------------------------------------------------------------------------------------------------------------------------------|
| fig 6666666.28482.peg.1781 | Contig_17 | 18644 | 17829 | - | Enoyl-CoA hydratase (EC 4.2.1.17)                                                                | FIG00033206 | idu(51);n-Phenylalkanoic_acid_degradation<br>icw(1);Polyhydroxybutyrate_metabolism<br>icw(1);Isoleucine_degradation<br>idu(51);Fatty_acid_metabolism_cluster<br>icw(1);Lysine_fermentation<br>icw(1);Butanol_Biosynthesis<br>icw(1);Acetyl-CoA_fermentation_to_Butyrate<br>icw(1);Valine_degradation<br>idu(51);Butyrate_metabolism_cluster |
| fig 6666666.28482.peg.1782 | Contig_17 | 19822 | 18641 | - | Butyryl-CoA dehydrogenase (EC 1.3.99.2)                                                          | FIG00009149 | idu(39);Isoleucine_degradation<br>idu(39);Lysine_fermentation<br>idu(39);Butanol_Biosynthesis<br>idu(39);Acetyl-CoA_fermentation_to_Butyrate<br>idu(39);Valine_degradation<br>idu(39);Anaerobic_respiratory_reductases                                                                                                                      |
| fig 6666666.28482.peg.1783 | Contig_17 | 21220 | 19922 | - | FIG00821608: hypothetical protein                                                                | FIG00821607 | ff                                                                                                                                                                                                                                                                                                                                          |
| fig 6666666.28482.peg.1784 | Contig_17 | 21502 | 22035 | + | FIG00823110: hypothetical protein                                                                | FIG00823105 | ff                                                                                                                                                                                                                                                                                                                                          |
| fig 6666666.28482.peg.1785 | Contig_17 | 22040 | 23317 | + | Phenylpropionate dioxygenase and related ring-hydroxylating dioxygenases, large terminal subunit | FIG01371907 | ff                                                                                                                                                                                                                                                                                                                                          |

|                            |           |       |       |   |                                               |             |                                                                                                                                                                                                                                |
|----------------------------|-----------|-------|-------|---|-----------------------------------------------|-------------|--------------------------------------------------------------------------------------------------------------------------------------------------------------------------------------------------------------------------------|
| fig 6666666.28482.peg.1786 | Contig_17 | 23301 | 23624 | + | FIG00820992:<br>hypothetical protein          | FIG00820991 | ff                                                                                                                                                                                                                             |
| fig 6666666.28482.peg.1787 | Contig_17 | 23628 | 24842 | + | Prolidase (EC 3.4.13.9)                       | FIG01313749 | ff                                                                                                                                                                                                                             |
| fig 6666666.28482.peg.1788 | Contig_17 | 24826 | 25248 | + | FIG00822989:<br>hypothetical protein          | FIG00822988 | ff                                                                                                                                                                                                                             |
| fig 6666666.28482.peg.1789 | Contig_17 | 25245 | 26342 | + | Acyl-CoA dehydrogenase<br>(EC 1.3.99.-)       | FIG00820935 | ff                                                                                                                                                                                                                             |
| fig 6666666.28482.peg.1790 | Contig_17 | 26346 | 27140 | + | Butyryl-CoA<br>dehydrogenase (EC<br>1.3.99.2) | FIG00009149 | idu(39);Isoleucine_degradation<br>idu(39);Lysine_fermentation<br>idu(39);Butanol_Biosynthesis<br>idu(39);Acetyl-<br>CoA_fermentation_to_Butyrate<br>idu(39);Valine_degradation<br>idu(39);Anaerobic_respiratory_reduc<br>tases |
| fig 6666666.28482.peg.1791 | Contig_17 | 27245 | 27457 | + | FIG00827257:<br>hypothetical protein          | FIG00827256 | ff                                                                                                                                                                                                                             |
| fig 6666666.28482.peg.1792 | Contig_17 | 28629 | 27454 | - | Acyl-CoA dehydrogenase<br>(EC 1.3.99.-)       | FIG01333225 | ff                                                                                                                                                                                                                             |
| fig 6666666.28482.peg.1793 | Contig_17 | 28849 | 29499 | + | Transcriptional regulator,<br>TetR family     | FIG00554417 | ff                                                                                                                                                                                                                             |
| fig 6666666.28482.peg.1794 | Contig_17 | 29672 | 30523 | + | FIG00820419:<br>hypothetical protein          | FIG01323985 | ff                                                                                                                                                                                                                             |
| fig 6666666.28482.peg.1795 | Contig_17 | 30562 | 31368 | + | short chain<br>dehydrogenase                  |             |                                                                                                                                                                                                                                |
| fig 6666666.28482.peg.1796 | Contig_17 | 34215 | 31831 | - | CAIB-BAIF family family                       | FIG01503811 | ff                                                                                                                                                                                                                             |
| fig 6666666.28482.peg.1797 | Contig_17 | 35375 | 34257 | - | Xaa-Pro dipeptidase (EC<br>3.4.13.9)          |             |                                                                                                                                                                                                                                |
| fig 6666666.28482.peg.1798 | Contig_17 | 36606 | 35365 | - | FIG00826794:<br>hypothetical protein          | FIG00826792 | ff                                                                                                                                                                                                                             |

|                            |           |       |       |   |                                                           |             |                                                                                                                   |
|----------------------------|-----------|-------|-------|---|-----------------------------------------------------------|-------------|-------------------------------------------------------------------------------------------------------------------|
| fig 6666666.28482.peg.1799 | Contig_17 | 37789 | 36617 | - | BarH                                                      | FIG00668014 | ff                                                                                                                |
| fig 6666666.28482.peg.1800 | Contig_17 | 39092 | 37839 | - | putative cytochrome<br>P450 hydroxylase                   | FIG00032437 | idu(49);Nitric_oxide_synthase                                                                                     |
| fig 6666666.28482.peg.1801 | Contig_17 | 39288 | 39094 | - | Ferredoxin                                                | FIG00001676 | idu(4);Soluble_cytochromes_and_fun<br>ctionally_related_electron_carriers<br>idu(4);Inorganic_Sulfur_Assimilation |
| fig 6666666.28482.peg.1802 | Contig_17 | 39979 | 39299 | - | Transcriptional regulator, TetR family                    | FIG00554417 | ff                                                                                                                |
| fig 6666666.28482.peg.1803 | Contig_17 | 40854 | 40045 | - | Short chain dehydrogenase                                 | FIG01310822 | ff                                                                                                                |
| fig 6666666.28482.peg.1804 | Contig_17 | 40995 | 41762 | + | putative secreted protein                                 | FIG00905474 | ff                                                                                                                |
| fig 6666666.28482.peg.1805 | Contig_17 | 41786 | 42529 | + | 3-oxoacyl-[acyl-carrier protein] reductase (EC 1.1.1.100) | FIG00621114 | idu(38);CBSS-246196.1.peg.364<br>idu(38);CBSS-164757.7.peg.5020<br>idu(38);Fatty_Acid_Biosynthesis_FASI           |
| fig 6666666.28482.peg.1806 | Contig_17 | 42537 | 43403 | + | hypothetical protein                                      | FIG00638284 | ff                                                                                                                |
| fig 6666666.28482.peg.1807 | Contig_17 | 43486 | 45057 | + | Multicopper oxidase                                       | FIG00060246 | idu(2);Copper_homeostasis                                                                                         |
| fig 6666666.28482.peg.1808 | Contig_17 | 45882 | 45061 | - | 2-hydroxymuconic semialdehyde hydrolase (EC 3.7.1.9)      | FIG00042074 | idu(1);Central_meta-<br>cleavage_pathway_of_aromatic_com<br>pound_degradation                                     |
| fig 6666666.28482.peg.1809 | Contig_17 | 46888 | 45896 | - | FIG00823018:<br>hypothetical protein                      | FIG00823016 | ff                                                                                                                |
| fig 6666666.28482.peg.1810 | Contig_17 | 47703 | 46876 | - | 3-alpha-hydroxysteroid dehydrogenase                      | FIG01322334 | ff                                                                                                                |

|                            |           |       |       |   |                                                                                                   |             |                                                                                                                                                     |
|----------------------------|-----------|-------|-------|---|---------------------------------------------------------------------------------------------------|-------------|-----------------------------------------------------------------------------------------------------------------------------------------------------|
| fig 6666666.28482.peg.1811 | Contig_17 | 49028 | 47724 | - | F420-dependent<br>N(5),N(10)-<br>methylenetetrahydromet<br>hanopterin reductase (EC<br>1.5.99.11) | FIG00820831 | isu;Methanogenesis                                                                                                                                  |
| fig 6666666.28482.peg.1812 | Contig_17 | 50784 | 49048 | - | 3-oxosteroid 1-<br>dehydrogenase (EC<br>1.3.99.4)                                                 | FIG01318047 | ff                                                                                                                                                  |
| fig 6666666.28482.peg.1813 | Contig_17 | 51608 | 50781 | - | 2,3-<br>dihydroxyphenylpropiona<br>te 1,2-dioxygenase (EC<br>1.13.11.-)                           | FIG01955093 | ff                                                                                                                                                  |
| fig 6666666.28482.peg.1814 | Contig_17 | 53346 | 51646 | - | 3-(3-hydroxy-<br>phenyl)propionate<br>hydroxylase (EC 1.14.13.-<br>)                              | FIG00138127 | idu(3);Cinnamic_Acid_Degradation                                                                                                                    |
| fig 6666666.28482.peg.1815 | Contig_17 | 54218 | 53355 | - | 2-hydroxy-6-oxo-6-<br>phenylhexa-2,4-dienoate<br>hydrolase (EC 3.7.1.-)                           | FIG00003780 | idu(2);carbazol_degradation_cluster<br>idu(2);Central_meta-<br>cleavage_pathway_of_aromatic_com<br>pound_degradation<br>idu(2);Biphenyl_Degradation |
| fig 6666666.28482.peg.1816 | Contig_17 | 54347 | 55012 | + | Transcriptional regulator,<br>IclR family                                                         | FIG00022569 | idu(12);Homogentisate_pathway_of_<br>aromatic_compound_degradation                                                                                  |
| fig 6666666.28482.peg.1817 | Contig_17 | 55039 | 56670 | + | 3-oxosteroid 1-<br>dehydrogenase (EC<br>1.3.99.4)                                                 | FIG01318047 | ff                                                                                                                                                  |
| fig 6666666.28482.peg.1818 | Contig_17 | 57896 | 56679 | - | POSSIBLE TWO<br>COMPONENT SENSOR<br>KINASE                                                        | FIG01324569 | ff                                                                                                                                                  |

|                            |           |       |       |   |                                                                            |             |                                                                  |
|----------------------------|-----------|-------|-------|---|----------------------------------------------------------------------------|-------------|------------------------------------------------------------------|
| fig 6666666.28482.peg.1819 | Contig_17 | 57965 | 58618 | + | DNA-binding response regulator, LuxR family                                | FIG01307606 | ff                                                               |
| fig 6666666.28482.peg.1820 | Contig_17 | 58621 | 59577 | + | Microsomal dipeptidase (EC 3.4.13.19)                                      | FIG00030415 | isu;Pyrroloquinoline_Quinone_biosynthesis                        |
| fig 6666666.28482.peg.1821 | Contig_17 | 59968 | 59594 | - | Limonene-1,2-epoxide hydrolase                                             |             |                                                                  |
| fig 6666666.28482.peg.1822 | Contig_17 | 60903 | 60016 | - | putative periplasmic protein kinase ArgK and related GTPases of G3E family | FIG00007966 | idu(1);G3E_family_of_P-loop_GTPases_(metallocenter_biosynthesis) |

|                            |           |       |       |   |                                                                                   |             |                                                                                                                                                                                                                                                                                                                                                                                                                                                                                                                                                                                                                            |
|----------------------------|-----------|-------|-------|---|-----------------------------------------------------------------------------------|-------------|----------------------------------------------------------------------------------------------------------------------------------------------------------------------------------------------------------------------------------------------------------------------------------------------------------------------------------------------------------------------------------------------------------------------------------------------------------------------------------------------------------------------------------------------------------------------------------------------------------------------------|
| fig 6666666.28482.peg.1823 | Contig_17 | 62092 | 60911 | - | 3-ketoacyl-CoA thiolase (EC 2.3.1.16) @ Acetyl-CoA acetyltransferase (EC 2.3.1.9) | FIG00000004 | idu(11);CBSS-246196.1.peg.364<br>idu(9);Serine-glyoxylate_cycle<br>idu(11);Serine-glyoxylate_cycle<br>icw(1);n-Phenylalkanoic_acid_degradation<br>idu(9);Ethylmalonyl-CoA_pathway_of_C2_assimilation,_GJO<br>idu(9);Polyhydroxybutyrate_metabolism<br>icw(1);Polyhydroxybutyrate_metabolism<br>icw(2);Isoleucine_degradation<br>icw(1);Fatty_acid_metabolism_cluster<br>idu(11);Biotin_synthesis_cluster<br>idu(11);Biotin_biosynthesis<br>icw(2);Lysine_fermentation<br>idu(9);Isoprenoid_Biosynthesis<br>icw(2);Butanol_Biosynthesis<br>icw(2);Acetyl-CoA_fermentation_to_Butyrate<br>icw(1);Butyrate_metabolism_cluster |
| fig 6666666.28482.peg.1824 | Contig_17 | 62673 | 62155 | - | Phenolic acid decarboxylase (EC 4.1.1.-)                                          | FIG00023936 | isu;CBSS-1352.1.peg.856                                                                                                                                                                                                                                                                                                                                                                                                                                                                                                                                                                                                    |
| fig 6666666.28482.peg.1825 | Contig_17 | 62803 | 63036 | + | hypothetical protein                                                              |             |                                                                                                                                                                                                                                                                                                                                                                                                                                                                                                                                                                                                                            |
| fig 6666666.28482.peg.1826 | Contig_17 | 63122 | 64012 | + | FIG00824413: hypothetical protein                                                 | FIG00824412 | ff                                                                                                                                                                                                                                                                                                                                                                                                                                                                                                                                                                                                                         |

|                            |           |       |       |   |                                                                              |             |                                                                                                                                                                                                                                                                                                                                               |
|----------------------------|-----------|-------|-------|---|------------------------------------------------------------------------------|-------------|-----------------------------------------------------------------------------------------------------------------------------------------------------------------------------------------------------------------------------------------------------------------------------------------------------------------------------------------------|
| fig 6666666.28482.peg.1827 | Contig_17 | 64839 | 64072 | - | Enoyl-CoA hydratase (EC 4.2.1.17)                                            | FIG00033206 | idu(51);n-Phenylalkanoic_acid_degradation<br>icw(1);Polyhydroxybutyrate_metaboli<br>sm icw(1);Isoleucine_degradation<br>idu(51);Fatty_acid_metabolism_clust<br>er icw(1);Lysine_fermentation<br>icw(1);Butanol_Biosynthesis<br>icw(1);Acetyl-CoA_fermentation_to_Butyrate<br>icw(1);Valine_degradation<br>idu(51);Butyrate_metabolism_cluster |
| fig 6666666.28482.peg.1828 | Contig_17 | 65937 | 64840 | - | Butyryl-CoA dehydrogenase (EC 1.3.99.2)                                      | FIG00009149 | idu(39);Isoleucine_degradation<br>idu(39);Lysine_fermentation<br>idu(39);Butanol_Biosynthesis<br>idu(39);Acetyl-CoA_fermentation_to_Butyrate<br>idu(39);Valine_degradation<br>idu(39);Anaerobic_respiratory_reduc<br>tases                                                                                                                    |
| fig 6666666.28482.peg.1829 | Contig_17 | 66829 | 65924 | - | FIG00823074:<br>hypothetical protein                                         | FIG00823067 | ff                                                                                                                                                                                                                                                                                                                                            |
| fig 6666666.28482.peg.1830 | Contig_17 | 68210 | 66807 | - | 4-coumarate--CoA ligase 1 (EC 6.2.1.12)                                      | FIG00820129 | ff                                                                                                                                                                                                                                                                                                                                            |
| fig 6666666.28482.peg.1831 | Contig_17 | 68311 | 68655 | + | Probable phenylacetic acid degradation NADH oxidoreductase paaE (EC 1.-.-.-) | FIG01355358 | ff                                                                                                                                                                                                                                                                                                                                            |
| fig 6666666.28482.peg.1832 | Contig_17 | 68675 | 68989 | + | FIG00829186:<br>hypothetical protein                                         | FIG00829181 | ff                                                                                                                                                                                                                                                                                                                                            |

|                            |           |       |       |   |                                                                               |             |                                                                                                            |
|----------------------------|-----------|-------|-------|---|-------------------------------------------------------------------------------|-------------|------------------------------------------------------------------------------------------------------------|
| fig 6666666.28482.peg.1833 | Contig_17 | 69003 | 70265 | + | FIG00823137:<br>hypothetical protein                                          | FIG00823136 | ff                                                                                                         |
| fig 6666666.28482.peg.1834 | Contig_17 | 71277 | 70354 | - | conserved hypothetical<br>protein SCE20.23                                    |             |                                                                                                            |
| fig 6666666.28482.peg.1835 | Contig_17 | 72167 | 71274 | - | NAD-dependent<br>epimerase/dehydratase                                        | FIG00988521 | ff                                                                                                         |
| fig 6666666.28482.peg.1836 | Contig_17 | 72332 | 73246 | + | Transcriptional<br>regulators, LysR family                                    |             |                                                                                                            |
| fig 6666666.28482.peg.1837 | Contig_17 | 74269 | 73232 | - | L-carnitine<br>dehydratase/bile acid-<br>inducible protein F (EC<br>2.8.3.16) | FIG00450481 | ff                                                                                                         |
| fig 6666666.28482.peg.1838 | Contig_17 | 75222 | 74266 | - | putative oxidoreductase                                                       | FIG00945653 | ff                                                                                                         |
| fig 6666666.28482.peg.1839 | Contig_17 | 75635 | 75207 | - | B12 binding domain of<br>Methylmalonyl-CoA<br>mutase (EC 5.4.99.2)            | FIG00004321 | isu;G3E_family_of_P-<br>loop_GTPases_(metallocenter_biosyn<br>thesis)                                      |
| fig 6666666.28482.peg.1840 | Contig_17 | 77213 | 75636 | - | Methylmalonyl-CoA<br>mutase (EC 5.4.99.2)                                     | FIG00000927 | idu(1);Serine-glyoxylate_cycle<br>icw(1);G3E_family_of_P-<br>loop_GTPases_(metallocenter_biosyn<br>thesis) |
| fig 6666666.28482.peg.1841 | Contig_17 | 78103 | 77291 | - | Methyltransferase (EC<br>2.1.1.-)                                             | FIG00515945 | ff                                                                                                         |
| fig 6666666.28482.peg.1842 | Contig_17 | 78870 | 78163 | - | D-alanyl-D-alanine<br>dipeptidase                                             | FIG01369240 | ff                                                                                                         |
| fig 6666666.28482.peg.1843 | Contig_17 | 79491 | 78886 | - | Transcriptional regulator,<br>TetR family                                     | FIG00554417 | ff                                                                                                         |
| fig 6666666.28482.peg.1844 | Contig_17 | 79554 | 81266 | + | FIG00828524:<br>hypothetical protein                                          | FIG00828522 | ff                                                                                                         |
| fig 6666666.28482.peg.1845 | Contig_17 | 81352 | 82494 | + | luciferase family protein                                                     |             |                                                                                                            |

|                            |           |        |        |   |                                              |             |                                |
|----------------------------|-----------|--------|--------|---|----------------------------------------------|-------------|--------------------------------|
| fig 6666666.28482.peg.1846 | Contig_17 | 82507  | 82959  | + | hypothetical protein                         | FIG00638284 | ff                             |
| fig 6666666.28482.peg.1847 | Contig_17 | 83013  | 84665  | + | PPE family protein                           | FIG00013075 | idu(57);CBSS-164757.7.peg.5020 |
| fig 6666666.28482.peg.1848 | Contig_17 | 84910  | 86412  | + | hypothetical protein                         |             |                                |
| fig 6666666.28482.peg.1849 | Contig_17 | 86693  | 86574  | - | hypothetical protein                         |             |                                |
| fig 6666666.28482.peg.1850 | Contig_17 | 87422  | 86841  | - | Transcriptional regulator, TetR family       | FIG00554417 | ff                             |
| fig 6666666.28482.peg.1851 | Contig_17 | 87506  | 88699  | + | putative cytochrome P450 hydroxylase         | FIG00032437 | idu(49);Nitric_oxide_synthase  |
| fig 6666666.28482.peg.1852 | Contig_17 | 89393  | 88758  | - | Transcriptional regulator, TetR family       | FIG00554417 | ff                             |
| fig 6666666.28482.peg.1853 | Contig_17 | 90190  | 93276  | + | hypothetical protein                         | FIG00638284 | ff                             |
| fig 6666666.28482.peg.1854 | Contig_17 | 93321  | 94169  | + | Hydrolase                                    | FIG00801965 | ff                             |
| fig 6666666.28482.peg.1855 | Contig_17 | 94677  | 94198  | - | FIG00825226: hypothetical protein            | FIG00825223 | ff                             |
| fig 6666666.28482.peg.1856 | Contig_17 | 94909  | 96477  | + | hypothetical protein                         |             |                                |
| fig 6666666.28482.peg.1857 | Contig_17 | 96659  | 96793  | + | hypothetical protein                         |             |                                |
| fig 6666666.28482.peg.1858 | Contig_17 | 97011  | 97790  | + | Transcriptional regulator KorSA, GntR family | FIG01122925 | ff                             |
| fig 6666666.28482.peg.1859 | Contig_17 | 97890  | 98312  | + | FIG00831412: hypothetical protein            | FIG00831411 | ff                             |
| fig 6666666.28482.peg.1860 | Contig_17 | 98309  | 99655  | + | Transfer protein traSA                       |             |                                |
| fig 6666666.28482.peg.1861 | Contig_17 | 99900  | 101057 | + | Integrase                                    | FIG01116662 | ff                             |
| fig 6666666.28482.rna.27   | Contig_17 | 101166 | 101093 | - | tRNA-Phe-GAA                                 |             | isu;tRNAs                      |
| fig 6666666.28482.rna.28   | Contig_17 | 101269 | 101196 | - | tRNA-Asp-GTC                                 |             |                                |
| fig 6666666.28482.rna.29   | Contig_17 | 101371 | 101299 | - | tRNA-Glu-TTC                                 |             |                                |
| fig 6666666.28482.rna.30   | Contig_17 | 101507 | 101579 | + | tRNA-Lys-TTT                                 |             |                                |
| fig 6666666.28482.peg.1862 | Contig_17 | 101708 | 102880 | + | Mobile element protein                       | FIG01306568 | ff                             |
| fig 6666666.28482.peg.1863 | Contig_17 | 103064 | 103873 | + | FIG00821728: hypothetical protein            | FIG00821727 | ff                             |

|                            |           |        |        |   |                                                                                                      |             |                                                                                                      |
|----------------------------|-----------|--------|--------|---|------------------------------------------------------------------------------------------------------|-------------|------------------------------------------------------------------------------------------------------|
| fig 6666666.28482.peg.1864 | Contig_17 | 104762 | 103863 | - | O-Methyltransferase involved in polyketide biosynthesis                                              | FIG01313020 | ff                                                                                                   |
| fig 6666666.28482.peg.1865 | Contig_17 | 104856 | 105356 | + | Deaminase                                                                                            | FIG01956300 | ff                                                                                                   |
| fig 6666666.28482.peg.1866 | Contig_17 | 105402 | 105791 | + | transcriptional regulator, ArsR family                                                               | FIG01319550 | ff                                                                                                   |
| fig 6666666.28482.peg.1867 | Contig_17 | 105788 | 105991 | + | zinc transporter Slc39a7                                                                             | FIG01491207 | ff                                                                                                   |
| fig 6666666.28482.peg.1868 | Contig_17 | 107011 | 105998 | - | FIG00820092: hypothetical protein                                                                    | FIG00820090 | ff                                                                                                   |
| fig 6666666.28482.peg.1869 | Contig_17 | 107079 | 107693 | + | Transcriptional regulator, TetR family                                                               | FIG00554417 | ff                                                                                                   |
| fig 6666666.28482.peg.1870 | Contig_17 | 107826 | 108842 | + | Fatty acid desaturase occurring in virulence cluster                                                 | FIG00996037 | icw(1);Mycobacterium_virulence_operon_involved_in_lipid_metabolism                                   |
| fig 6666666.28482.peg.1871 | Contig_17 | 108859 | 109992 | + | tRNA dihydrouridine synthase B (EC 1.-.-.-)                                                          | FIG00000580 | isu;Mycobacterium_virulence_operon_involved_in_lipid_metabolism                                      |
| fig 6666666.28482.peg.1872 | Contig_17 | 110197 | 112287 | + | Cell envelope-associated transcriptional attenuator LytR-CpsA-Psr, subfamily A1 (as in PMID19099556) | FIG00025213 | idu(3);Cell_envelope-associated_LytR-CpsA-Psr_transcriptional_attenuators                            |
| fig 6666666.28482.peg.1873 | Contig_17 | 112424 | 113014 | + | Phosphate transport system regulatory protein PhoU                                                   | FIG00104848 | icw(3);High_affinity_phosphate_transporter_and_control_of_PHO_regulon<br>icw(2);Phosphate_metabolism |
| fig 6666666.28482.peg.1874 | Contig_17 | 113787 | 113011 | - | Phosphate transport ATP-binding protein PstB (TC 3.A.1.7.1)                                          | FIG00011114 | icw(2);High_affinity_phosphate_transporter_and_control_of_PHO_regulon<br>icw(4);Phosphate_metabolism |

|                            |           |        |        |   |                                                                                      |             |                                                                                                                                                          |
|----------------------------|-----------|--------|--------|---|--------------------------------------------------------------------------------------|-------------|----------------------------------------------------------------------------------------------------------------------------------------------------------|
| fig 6666666.28482.peg.1875 | Contig_17 | 114714 | 113800 | - | Phosphate transport system permease protein PstA (TC 3.A.1.7.1)                      | FIG00083946 | icw(3);High_affinity_phosphate_transporter_and_control_of_PHO_regulon<br>icw(1);Phosphate_metabolism                                                     |
| fig 6666666.28482.peg.1876 | Contig_17 | 115676 | 114711 | - | Phosphate transport system permease protein PstC (TC 3.A.1.7.1)                      | FIG00018561 | icw(1);High_affinity_phosphate_transporter_and_control_of_PHO_regulon<br>idu(1);Phosphate_metabolism                                                     |
| fig 6666666.28482.peg.1877 | Contig_17 | 116761 | 115802 | - | Phosphate ABC transporter, periplasmic phosphate-binding protein PstS (TC 3.A.1.7.1) | FIG00010508 | icw(5);High_affinity_phosphate_transporter_and_control_of_PHO_regulon<br>icw(5);Phosphate_metabolism<br>icw(1);PhoR-PhoB_two-component_regulatory_system |
| fig 6666666.28482.peg.1878 | Contig_17 | 116808 | 116942 | + | hypothetical protein                                                                 | FIG00011306 | isu;Glutathione_analogs:_mycothiol                                                                                                                       |
| fig 6666666.28482.peg.1879 | Contig_17 | 117957 | 117085 | - | Acetyl-CoA:Cys-GlcN-Ins acetyltransferase, mycothiol synthase MshD                   |             |                                                                                                                                                          |
| fig 6666666.28482.peg.1880 | Contig_17 | 118781 | 118005 | - | Phosphate regulon transcriptional regulatory protein PhoB (SphR)                     | FIG01290653 | idu(1);High_affinity_phosphate_transporter_and_control_of_PHO_regulon<br>icw(2);Phosphate_metabolism<br>idu(1);PhoR-PhoB_two-component_regulatory_system |
| fig 6666666.28482.peg.1881 | Contig_17 | 118959 | 119771 | + | FIG00821015:<br>hypothetical protein                                                 | FIG00821014 | ff                                                                                                                                                       |
| fig 6666666.28482.peg.1882 | Contig_17 | 119848 | 120276 | + | Thioredoxin                                                                          | FIG01318274 | isu;CBSS-315749.4.peg.3658<br>isu;Glycine_reductase,_sarcosine_reductase_and_betaine_reductase                                                           |
| fig 6666666.28482.peg.1883 | Contig_17 | 120501 | 120965 | + | Possible membrane protein                                                            | FIG00822196 | ff                                                                                                                                                       |

|                            |           |        |        |   |                                                                                         |             |                                                                                                                                                                                      |
|----------------------------|-----------|--------|--------|---|-----------------------------------------------------------------------------------------|-------------|--------------------------------------------------------------------------------------------------------------------------------------------------------------------------------------|
| fig 6666666.28482.peg.1884 | Contig_17 | 121002 | 121835 | + | Thiosulfate<br>sulfurtransferase,<br>rhodanese (EC 2.8.1.1)                             | FIG00004487 | ff                                                                                                                                                                                   |
| fig 6666666.28482.peg.1885 | Contig_17 | 121867 | 122139 | + | probable sseC protein                                                                   |             |                                                                                                                                                                                      |
| fig 6666666.28482.peg.1886 | Contig_17 | 122336 | 123004 | + | DUF1794                                                                                 | FIG00020072 | idu(1);Iron-sulfur_cluster_assembly                                                                                                                                                  |
| fig 6666666.28482.peg.1887 | Contig_17 | 124120 | 123254 | - | Aminodeoxychorismate<br>lyase (EC 4.1.3.38)                                             | FIG00000708 | isu;Chorismate:_Intermediate_for_sy<br>nthesis_of_Tryptophan,_PAPA_antibi<br>otics,_PABA,_3-<br>hydroxyanthranilate_and_more.<br>isu;Folate_Biosynthesis<br>isu;Tryptophan_synthesis |
| fig 6666666.28482.peg.1888 | Contig_17 | 124180 | 125274 | + | Folate-dependent<br>protein for Fe/S cluster<br>synthesis/repair in<br>oxidative stress | FIG00043717 | icw(1);Iron-sulfur_cluster_assembly                                                                                                                                                  |
| fig 6666666.28482.peg.1889 | Contig_17 | 125422 | 125598 | + | FIG00821405:<br>hypothetical protein                                                    | FIG00821404 | ff                                                                                                                                                                                   |
| fig 6666666.28482.peg.1890 | Contig_17 | 126742 | 125648 | - | Phosphoribosylformylgly<br>cinamide cyclo-ligase<br>(EC 6.3.3.1)                        | FIG00000222 | icw(1);De_Novo_Purine_Biosynthesis                                                                                                                                                   |
| fig 6666666.28482.peg.1891 | Contig_17 | 128338 | 126803 | - | Amidophosphoribosyltra<br>nsferase (EC 2.4.2.14)                                        | FIG00000179 | isu;De_Novo_Purine_Biosynthesis                                                                                                                                                      |
| fig 6666666.28482.peg.1892 | Contig_17 | 128865 | 128476 | - | hypothetical protein                                                                    |             |                                                                                                                                                                                      |
| fig 6666666.28482.peg.1893 | Contig_17 | 129450 | 128869 | - | 3',5'-cyclic-nucleotide<br>phosphodiesterase (EC<br>3.1.4.17)                           | FIG00001540 | isu;cAMP_signaling_in_bacteria<br>isu;CBSS-342610.3.peg.1794                                                                                                                         |
| fig 6666666.28482.peg.1894 | Contig_17 | 131756 | 129471 | - | Phosphoribosylformylgly<br>cinamide synthase,<br>synthetase subunit (EC<br>6.3.5.3)     | FIG01303876 | icw(2);De_Novo_Purine_Biosynthesis                                                                                                                                                   |

|                            |           |        |        |   |                                                                                                                        |             |                                                                                                  |
|----------------------------|-----------|--------|--------|---|------------------------------------------------------------------------------------------------------------------------|-------------|--------------------------------------------------------------------------------------------------|
| fig 6666666.28482.peg.1895 | Contig_17 | 132562 | 131774 | - | helix-turn-helix domain<br>protein                                                                                     |             |                                                                                                  |
| fig 6666666.28482.peg.1896 | Contig_17 | 132690 | 133085 | + | hypothetical protein                                                                                                   |             |                                                                                                  |
| fig 6666666.28482.peg.1897 | Contig_17 | 133668 | 133339 | - | glyoxalase family protein                                                                                              | FIG01000012 | ff                                                                                               |
|                            |           |        |        |   | superfamily                                                                                                            |             |                                                                                                  |
| fig 6666666.28482.peg.1898 | Contig_17 | 134969 | 133701 | - | Aspartyl aminopeptidase                                                                                                | FIG00015518 | ff                                                                                               |
| fig 6666666.28482.peg.1899 | Contig_17 | 135069 | 136028 | + | Predicted dye-<br>decolorizing peroxidase<br>(DyP), encapsulated<br>subgroup                                           | FIG00014133 | isu;Encapsulating_protein_for_DyP-<br>type_peroxidase_and_ferritin-<br>like_protein_oligomers    |
| fig 6666666.28482.peg.1900 | Contig_17 | 136025 | 136822 | + | Encapsulating protein for<br>a DyP-type peroxidase or<br>ferritin-like protein<br>oligomers                            | FIG00014104 | icw(1);Encapsulating_protein_for_Dy<br>P-type_peroxidase_and_ferritin-<br>like_protein_oligomers |
| fig 6666666.28482.peg.1901 | Contig_17 | 137038 | 137817 | + | hypothetical protein                                                                                                   |             |                                                                                                  |
| fig 6666666.28482.peg.1902 | Contig_17 | 139611 | 137911 | - | Flavohemoprotein<br>(Hemoglobin-like<br>protein)<br>(Flavohemoglobin) (Nitric<br>oxide dioxygenase) (EC<br>1.14.12.17) | FIG00000983 | isu;Glutaredoxins<br>isu;Flavo-haemoglobin<br>isu;Bacterial_hemoglobins                          |
| fig 6666666.28482.peg.1903 | Contig_17 | 139940 | 139800 | - | hypothetical protein                                                                                                   |             |                                                                                                  |
| fig 6666666.28482.peg.1904 | Contig_17 | 139971 | 140633 | + | putative hydrolase                                                                                                     | FIG00662601 | ff                                                                                               |
| fig 6666666.28482.peg.1905 | Contig_17 | 140709 | 141401 | + | Transcriptional regulator,<br>TetR family                                                                              | FIG00554417 | ff                                                                                               |
| fig 6666666.28482.peg.1906 | Contig_17 | 141398 | 142048 | + | Transcriptional regulator,<br>TetR family                                                                              | FIG00554417 | ff                                                                                               |
| fig 6666666.28482.peg.1907 | Contig_17 | 142268 | 143242 | + | Quinone oxidoreductase<br>(EC 1.6.5.5)                                                                                 | FIG00002982 | idu(7);Quinone_oxidoreductase_fami<br>ly                                                         |

|                            |           |        |        |   |                                                                                                          |             |                                    |
|----------------------------|-----------|--------|--------|---|----------------------------------------------------------------------------------------------------------|-------------|------------------------------------|
| fig 6666666.28482.peg.1908 | Contig_17 | 143304 | 143975 | + | haloacid dehalogenase,<br>type II( EC:3.8.1.2 )                                                          |             |                                    |
| fig 6666666.28482.peg.1909 | Contig_17 | 143979 | 145433 | + | PF00070 family, FAD-<br>dependent NAD(P)-<br>disulphide<br>oxidoreductase                                | FIG00001597 | idu(1);Mercuric_reductase          |
| fig 6666666.28482.peg.1910 | Contig_17 | 145437 | 145904 | + | FIG00820938:<br>hypothetical protein                                                                     | FIG00820937 | ff                                 |
| fig 6666666.28482.peg.1911 | Contig_17 | 146296 | 145898 | - | biphenyl-2,3-diol 1,2-<br>dioxygenase III-related<br>protein                                             | FIG00105129 | isu;Biphenyl_Degradation           |
| fig 6666666.28482.peg.1912 | Contig_17 | 146886 | 146299 | - | Transcriptional regulator,<br>TetR family                                                                | FIG00628138 | ff                                 |
| fig 6666666.28482.peg.1913 | Contig_17 | 146944 | 147345 | + | hypothetical protein                                                                                     |             |                                    |
| fig 6666666.28482.peg.1914 | Contig_17 | 147437 | 148645 | + | putative cytochrome<br>P450 hydroxylase                                                                  | FIG00032437 | idu(49);Nitric_oxide_synthase      |
| fig 6666666.28482.peg.1915 | Contig_17 | 148743 | 149222 | + | FIG00820357:<br>hypothetical protein                                                                     | FIG00820356 | ff                                 |
| fig 6666666.28482.peg.1916 | Contig_17 | 150319 | 149240 | - | UDP-glucose 4-epimerase                                                                                  | FIG00763453 | ff                                 |
| fig 6666666.28482.peg.1917 | Contig_17 | 150441 | 151277 | + | FIG00824813:<br>hypothetical protein                                                                     | FIG00824812 | ff                                 |
| fig 6666666.28482.peg.1918 | Contig_17 | 151299 | 152684 | + | Diacylglycerol O-<br>acyltransferase (EC<br>2.3.1.20)                                                    | FIG01460290 | ff                                 |
| fig 6666666.28482.peg.1919 | Contig_17 | 153355 | 152681 | - | Phosphoribosylformylgly<br>cinamidine synthase,<br>glutamine<br>amidotransferase subunit<br>(EC 6.3.5.3) | FIG00025475 | icw(1);De_Novo_Purine_Biosynthesis |

|                            |           |        |        |   |                                                                                  |             |                                                 |
|----------------------------|-----------|--------|--------|---|----------------------------------------------------------------------------------|-------------|-------------------------------------------------|
| fig 6666666.28482.peg.1920 | Contig_17 | 153591 | 153352 | - | Phosphoribosylformylgly<br>cinamidine synthase,<br>PurS subunit (EC 6.3.5.3)     | FIG00000869 | isu;De_Novo_Purine_Biosynthesis                 |
| fig 6666666.28482.peg.1921 | Contig_17 | 154330 | 153656 | - | FIG00820729:<br>hypothetical protein                                             | FIG00820728 | ff                                              |
| fig 6666666.28482.peg.1922 | Contig_17 | 154364 | 155002 | + | FIG00998332:<br>hypothetical protein                                             | FIG00820472 | ff                                              |
| fig 6666666.28482.peg.1923 | Contig_17 | 156743 | 155076 | - | Fumarate/succinate/L-<br>aspartate<br>dehydrogenases                             | FIG01355113 | ff                                              |
| fig 6666666.28482.peg.1924 | Contig_17 | 157496 | 156792 | - | FIG00998196:<br>hypothetical protein                                             | FIG00820963 | ff                                              |
| fig 6666666.28482.peg.1925 | Contig_17 | 157695 | 159302 | + | Inner membrane<br>component of tripartite<br>multidrug resistance<br>system      | FIG00005204 | ff                                              |
| fig 6666666.28482.peg.1926 | Contig_17 | 159862 | 159299 | - | Transcriptional regulator,<br>TetR family                                        | FIG00554417 | ff                                              |
| fig 6666666.28482.peg.1927 | Contig_17 | 162491 | 160329 | - | Protease II (EC 3.4.21.83)                                                       | FIG00614142 | ff                                              |
| fig 6666666.28482.peg.1928 | Contig_17 | 163381 | 162488 | - | Phosphoribosylaminoimi<br>dazole-<br>succinocarboxamide<br>synthase (EC 6.3.2.6) | FIG00000195 | isu;De_Novo_Purine_Biosynthesis                 |
| fig 6666666.28482.peg.1929 | Contig_17 | 163433 | 164062 | + | POSSIBLE CONSERVED<br>TRANSMEMBRANE<br>PROTEIN                                   | FIG01417063 | ff                                              |
| fig 6666666.28482.peg.1930 | Contig_17 | 164967 | 164068 | - | putative esterase                                                                |             | idu(2);Alpha-<br>Amylase_locus_in_Streptococcus |

|                            |           |        |        |   |                                                   |             |                                                                                                                                                                |
|----------------------------|-----------|--------|--------|---|---------------------------------------------------|-------------|----------------------------------------------------------------------------------------------------------------------------------------------------------------|
| fig 6666666.28482.peg.1931 | Contig_17 | 166072 | 165080 | - | putative C4-dicarboxylate transporter             | FIG01387533 | ff                                                                                                                                                             |
| fig 6666666.28482.peg.1932 | Contig_17 | 167316 | 166069 | - | Cytochrome P450 126A3                             | FIG01369642 | ff                                                                                                                                                             |
| fig 6666666.28482.peg.1933 | Contig_17 | 168731 | 167313 | - | Adenylosuccinate lyase (EC 4.3.2.2)               | FIG00000117 | isu;Purine_conversions<br>isu;De_Novo_Purine_Biosynthesis                                                                                                      |
| fig 6666666.28482.peg.1934 | Contig_17 | 168764 | 169498 | + | FIG00820278:<br>hypothetical protein              | FIG00820277 | ff                                                                                                                                                             |
| fig 6666666.28482.peg.1935 | Contig_17 | 170072 | 169503 | - | Transcriptional regulator, TetR family            | FIG00554417 | ff                                                                                                                                                             |
| fig 6666666.28482.peg.1936 | Contig_17 | 170182 | 171081 | + | Gamma-glutamyltranspeptidase (EC 2.3.2.2)         | FIG00005992 | icw(1);Glutathione:_Biosynthesis_and_gamma-glutamyl_cycle<br>icw(1);Utilization_of_glutathione_as_a_sulphur_source<br>icw(1);Poly-gamma-glutamate_biosynthesis |
| fig 6666666.28482.peg.1937 | Contig_17 | 171225 | 172808 | + | Gamma-glutamyltranspeptidase (EC 2.3.2.2)         | FIG00005992 | icw(1);Glutathione:_Biosynthesis_and_gamma-glutamyl_cycle<br>icw(1);Utilization_of_glutathione_as_a_sulphur_source<br>icw(1);Poly-gamma-glutamate_biosynthesis |
| fig 6666666.28482.peg.1938 | Contig_17 | 174073 | 172805 | - | Phosphoribosylamine--glycine ligase (EC 6.3.4.13) | FIG00000235 | isu;De_Novo_Purine_Biosynthesis                                                                                                                                |
| fig 6666666.28482.peg.1939 | Contig_17 | 174505 | 174098 | - | Transcriptional regulator, MarR family            |             |                                                                                                                                                                |
| fig 6666666.28482.peg.1940 | Contig_17 | 174587 | 175684 | + | aldo/keto reductase                               | FIG01122489 | ff                                                                                                                                                             |

|                            |            |      |      |   |                                                            |             |                                                                                                                  |
|----------------------------|------------|------|------|---|------------------------------------------------------------|-------------|------------------------------------------------------------------------------------------------------------------|
| fig 6666666.28482.peg.1941 | Contig_170 | 548  | 306  | - | PROBABLE CONSERVED<br>TRANSMEMBRANE<br>PROTEIN             | FIG00662132 | ff                                                                                                               |
| fig 6666666.28482.peg.1942 | Contig_175 | 34   | 201  | + | Cyclohexanone<br>monooxygenase (EC<br>1.14.13.22)          | FIG00975774 | ff                                                                                                               |
| fig 6666666.28482.peg.1943 | Contig_175 | 685  | 206  | - | cholesterol oxidase(<br>EC:1.1.3.6 )                       |             |                                                                                                                  |
| fig 6666666.28482.peg.1944 | Contig_177 | 1463 | 810  | - | L-seryl-tRNA(Sec)<br>selenium transferase (EC<br>2.9.1.1)  | FIG00009265 | isu;Selenocysteine_metabolism                                                                                    |
| fig 6666666.28482.peg.1945 | Contig_18  | 2130 | 688  | - | hypothetical protein                                       | FIG00638284 | ff                                                                                                               |
| fig 6666666.28482.peg.1946 | Contig_18  | 3092 | 2253 | - | short-chain<br>dehydrogenase/reductas<br>e SDR             |             |                                                                                                                  |
| fig 6666666.28482.peg.1947 | Contig_18  | 3709 | 3089 | - | dTDP-4-<br>dehydrorhamnose 3,5-<br>epimerase (EC 5.1.3.13) | FIG00000408 | icw(1);dTDP-rhamnose_synthesis<br>icw(1);Rhamnose_containing_glycans<br>idu(1);Capsular_heptose_biosynthesi<br>s |
| fig 6666666.28482.peg.1948 | Contig_18  | 4712 | 3711 | - | dTDP-glucose 4,6-<br>dehydratase (EC 4.2.1.46)             | FIG00030688 | idu(4);dTDP-rhamnose_synthesis<br>idu(4);Rhamnose_containing_glycans                                             |

|                            |           |       |       |   |                                                                                                                                              |             |                                                                                                                                                        |
|----------------------------|-----------|-------|-------|---|----------------------------------------------------------------------------------------------------------------------------------------------|-------------|--------------------------------------------------------------------------------------------------------------------------------------------------------|
| fig 6666666.28482.peg.1949 | Contig_18 | 5601  | 4735  | - | Coenzyme F420-<br>dependent N5,N10-<br>methylene<br>tetrahydromethanopteri<br>n reductase and related<br>flavin-dependent<br>oxidoreductases | FIG00465245 | ff                                                                                                                                                     |
| fig 6666666.28482.peg.1950 | Contig_18 | 6452  | 5622  | - | Coenzyme F420-<br>dependent N5,N10-<br>methylene<br>tetrahydromethanopteri<br>n reductase and related<br>flavin-dependent<br>oxidoreductases | FIG00465245 | ff                                                                                                                                                     |
| fig 6666666.28482.peg.1951 | Contig_18 | 7975  | 6482  | - | sensor histidine kinase                                                                                                                      | FIG01107919 | ff                                                                                                                                                     |
| fig 6666666.28482.peg.1952 | Contig_18 | 9660  | 7984  | - | Thioredoxin reductase<br>(EC 1.8.1.9)                                                                                                        | FIG00018396 | idu(3);pyrimidine_conversions<br>idu(3);Thioredoxin-<br>disulfide_reductase<br>idu(3);Glycine_reductase,_sarcosine_<br>reductase_and_betaine_reductase |
| fig 6666666.28482.peg.1953 | Contig_18 | 9912  | 10133 | + | Translation initiation<br>factor 1                                                                                                           | FIG00000143 | isu;Translation_initiation_factors_bac<br>terial                                                                                                       |
| fig 6666666.28482.peg.1954 | Contig_18 | 10166 | 10279 | + | LSU ribosomal protein<br>L36p                                                                                                                | FIG00000229 | isu;Ribosome_LSU_bacterial                                                                                                                             |
| fig 6666666.28482.peg.1955 | Contig_18 | 10443 | 10817 | + | SSU ribosomal protein<br>S13p (S18e)                                                                                                         | FIG00000160 | ff                                                                                                                                                     |
| fig 6666666.28482.peg.1956 | Contig_18 | 10824 | 11243 | + | SSU ribosomal protein<br>S11p (S14e)                                                                                                         | FIG00055673 | ff                                                                                                                                                     |

|                            |           |       |       |   |                                                        |             |                                                        |
|----------------------------|-----------|-------|-------|---|--------------------------------------------------------|-------------|--------------------------------------------------------|
| fig 6666666.28482.peg.1957 | Contig_18 | 11247 | 11852 | + | SSU ribosomal protein S4p (S9e)                        | FIG00000148 | isu;CBSS-393130.3.peg.794                              |
| fig 6666666.28482.peg.1958 | Contig_18 | 11984 | 13027 | + | DNA-directed RNA polymerase alpha subunit (EC 2.7.7.6) | FIG00000140 | isu;RNA_polymerase_bacterial                           |
| fig 6666666.28482.peg.1959 | Contig_18 | 13144 | 13788 | + | LSU ribosomal protein L17p                             | FIG00000154 | icw(1);Ribosome_LSU_bacterial                          |
| fig 6666666.28482.peg.1960 | Contig_18 | 13919 | 14629 | + | tRNA pseudouridine synthase A (EC 4.2.1.70)            | FIG00000093 | isu;tRNA_processing<br>isu;RNA_pseudouridine_syntheses |
| fig 6666666.28482.peg.1961 | Contig_18 | 15246 | 14626 | - | serine esterase, cutinase family                       | FIG01349249 | ff                                                     |
| fig 6666666.28482.peg.1962 | Contig_18 | 16079 | 15303 | - | serine esterase, cutinase family                       | FIG01349249 | ff                                                     |
| fig 6666666.28482.peg.1963 | Contig_18 | 16255 | 17643 | + | PROBABLE CONSERVED MEMBRANE PROTEIN                    | FIG00662487 | ff                                                     |
| fig 6666666.28482.peg.1964 | Contig_18 | 18876 | 17608 | - | subtilase family protein                               | FIG00546145 | ff                                                     |
| fig 6666666.28482.peg.1965 | Contig_18 | 20213 | 18873 | - | PROBABLE CONSERVED INTEGRAL MEMBRANE PROTEIN           |             |                                                        |
| fig 6666666.28482.peg.1966 | Contig_18 | 20480 | 23926 | + | FtsK/SpoIIIE family protein                            | FIG01309712 | ff                                                     |
| fig 6666666.28482.peg.1967 | Contig_18 | 23923 | 25179 | + | Type VII secretion-associated protein                  | FIG00820120 | ff                                                     |
| fig 6666666.28482.peg.1968 | Contig_18 | 25251 | 25529 | + | ESAT-6 like protein EsxU                               | FIG00822192 | ff                                                     |
| fig 6666666.28482.peg.1969 | Contig_18 | 25544 | 25840 | + | probable secreted protein                              | FIG00999229 | ff                                                     |
| fig 6666666.28482.peg.1970 | Contig_18 | 27033 | 25894 | - | hypothetical protein                                   |             |                                                        |
| fig 6666666.28482.peg.1971 | Contig_18 | 27318 | 28265 | + | hypothetical protein                                   |             |                                                        |

|                            |            |       |       |   |                                                 |             |                                                                                            |
|----------------------------|------------|-------|-------|---|-------------------------------------------------|-------------|--------------------------------------------------------------------------------------------|
| fig 6666666.28482.peg.1972 | Contig_18  | 31439 | 28266 | - | Adenylate cyclase (EC 4.6.1.1)                  | FIG00001294 | idu(25);cAMP_signaling_in_bacteria                                                         |
| fig 6666666.28482.peg.1973 | Contig_18  | 31709 | 32152 | + | LSU ribosomal protein L13p (L13Ae)              | FIG00000211 | isu;Ribosome_LSU_bacterial                                                                 |
| fig 6666666.28482.peg.1974 | Contig_18  | 32149 | 32640 | + | SSU ribosomal protein S9p (S16e)                | FIG00001110 | ff                                                                                         |
| fig 6666666.28482.peg.1975 | Contig_18  | 32767 | 34104 | + | Phosphoglucosamine mutase (EC 5.4.2.10)         | FIG00009682 | isu;Sialic_Acid_Metabolism isu;UDP-N-acetylmuramate_from_Fructose-6-phosphate_Biosynthesis |
| fig 6666666.28482.peg.1976 | Contig_18  | 34172 | 34438 | + | FIG00820542: hypothetical protein               | FIG00820541 | ff                                                                                         |
| fig 6666666.28482.peg.1977 | Contig_180 | 1086  | 943   | - | hypothetical protein                            |             |                                                                                            |
| fig 6666666.28482.peg.1978 | Contig_180 | 1463  | 1092  | - | PE-PGRS FAMILY PROTEIN                          |             |                                                                                            |
| fig 6666666.28482.peg.1979 | Contig_184 | 859   | 740   | - | Mobile element protein                          | FIG01306568 | ff                                                                                         |
| fig 6666666.28482.peg.1980 | Contig_19  | 452   | 15    | - | FIG00820003: hypothetical protein               | FIG00820002 | ff                                                                                         |
| fig 6666666.28482.peg.1981 | Contig_19  | 1042  | 452   | - | FIG00822063: hypothetical protein               | FIG00822060 | ff                                                                                         |
| fig 6666666.28482.peg.1982 | Contig_19  | 1194  | 1598  | + | PUTATIVE LIPOPROTEIN LPQV                       | FIG01316007 | ff                                                                                         |
| fig 6666666.28482.peg.1983 | Contig_19  | 1688  | 2743  | + | UPF0028 protein YchK                            | FIG01304453 | isu;Broadly_distributed_proteins_not_in_subsystems                                         |
| fig 6666666.28482.peg.1984 | Contig_19  | 3610  | 2744  | - | probably phosphoesterase, evidenced by COGnitor | FIG01311108 | ff                                                                                         |
| fig 6666666.28482.peg.1985 | Contig_19  | 4476  | 3607  | - | glutamine amidotransferases, class-II           | FIG01443783 | ff                                                                                         |

|                            |           |       |       |   |                                                             |                                                                                                                                                                        |
|----------------------------|-----------|-------|-------|---|-------------------------------------------------------------|------------------------------------------------------------------------------------------------------------------------------------------------------------------------|
| fig 6666666.28482.peg.1986 | Contig_19 | 5009  | 4518  | - | FIG00820309:<br>hypothetical protein                        | FIG00820308 ff                                                                                                                                                         |
| fig 6666666.28482.peg.1987 | Contig_19 | 6068  | 5010  | - | FIG00821199:<br>hypothetical protein                        | FIG00821197 ff                                                                                                                                                         |
| fig 6666666.28482.peg.1988 | Contig_19 | 7794  | 6166  | - | Long-chain-fatty-acid--<br>CoA ligase (EC 6.2.1.3)          | FIG00018699 idu(72);n-<br>Phenylalkanoic_acid_degradation<br>idu(72);Fatty_acid_metabolism_clust<br>er idu(72);Biotin_synthesis_cluster<br>idu(72);Biotin_biosynthesis |
| fig 6666666.28482.peg.1989 | Contig_19 | 8991  | 7912  | - | hypothetical protein                                        |                                                                                                                                                                        |
| fig 6666666.28482.peg.1990 | Contig_19 | 8965  | 9078  | + | hypothetical protein                                        |                                                                                                                                                                        |
| fig 6666666.28482.peg.1991 | Contig_19 | 9481  | 10641 | + | hypothetical protein                                        | FIG00638284 ff                                                                                                                                                         |
| fig 6666666.28482.peg.1992 | Contig_19 | 10988 | 10650 | - | Nitrogen regulatory<br>protein P-II                         | FIG00005111 idu(1);Ammonia_assimilation                                                                                                                                |
| fig 6666666.28482.peg.1993 | Contig_19 | 12411 | 11005 | - | Ammonium transporter                                        | FIG00004764 icw(1);Ammonia_assimilation                                                                                                                                |
| fig 6666666.28482.peg.1994 | Contig_19 | 12799 | 14013 | + | FAD dependent<br>oxidoreductase                             |                                                                                                                                                                        |
| fig 6666666.28482.peg.1995 | Contig_19 | 14122 | 15513 | + | Cytochrome P450                                             | FIG01320789 ff                                                                                                                                                         |
| fig 6666666.28482.peg.1996 | Contig_19 | 16231 | 15464 | - | hypothetical protein                                        |                                                                                                                                                                        |
| fig 6666666.28482.peg.1997 | Contig_19 | 16503 | 16228 | - | hypothetical protein                                        |                                                                                                                                                                        |
| fig 6666666.28482.peg.1998 | Contig_19 | 17270 | 16515 | - | putative<br>carboxymethylenebuten<br>olidase( EC:3.1.1.45 ) | FIG00827058 ff                                                                                                                                                         |
| fig 6666666.28482.peg.1999 | Contig_19 | 17444 | 18154 | + | two-component system<br>response regulator                  | FIG00517054 ff                                                                                                                                                         |
| fig 6666666.28482.peg.2000 | Contig_19 | 18765 | 18157 | - | sigma factor, sigma 70<br>type, group 4 (ECF)               |                                                                                                                                                                        |

|                            |           |       |       |   |                                                                      |             |                                                                                                                               |
|----------------------------|-----------|-------|-------|---|----------------------------------------------------------------------|-------------|-------------------------------------------------------------------------------------------------------------------------------|
| fig 6666666.28482.peg.2001 | Contig_19 | 19045 | 19398 | + | nitrate/nitrite response<br>regulator protein                        |             |                                                                                                                               |
| fig 6666666.28482.peg.2002 | Contig_19 | 19520 | 19395 | - | hypothetical protein                                                 |             |                                                                                                                               |
| fig 6666666.28482.peg.2003 | Contig_19 | 19643 | 20749 | + | Heat shock protein HtrA                                              |             |                                                                                                                               |
| fig 6666666.28482.peg.2004 | Contig_19 | 22398 | 20788 | - | hypothetical protein                                                 | FIG00638284 | ff                                                                                                                            |
| fig 6666666.28482.peg.2005 | Contig_19 | 23226 | 22633 | - | hypothetical protein                                                 |             |                                                                                                                               |
| fig 6666666.28482.peg.2006 | Contig_19 | 23557 | 23856 | + | PE family protein                                                    |             |                                                                                                                               |
| fig 6666666.28482.peg.2007 | Contig_19 | 23872 | 25002 | + | PPE family protein                                                   | FIG00013075 | idu(57);CBSS-164757.7.peg.5020                                                                                                |
| fig 6666666.28482.peg.2008 | Contig_19 | 26239 | 25649 | - | hypothetical protein                                                 |             |                                                                                                                               |
| fig 6666666.28482.peg.2009 | Contig_19 | 27165 | 26269 | - | hypothetical protein                                                 | FIG00638284 | ff                                                                                                                            |
| fig 6666666.28482.peg.2010 | Contig_19 | 28745 | 27165 | - | 3-(3-hydroxy-<br>phenyl)propionate<br>hydroxylase (EC 1.14.13.-<br>) | FIG00138127 | idu(3);Cinnamic_Acid_Degradation                                                                                              |
| fig 6666666.28482.peg.2011 | Contig_19 | 29659 | 28742 | - | Fumarylacetoacetate<br>hydrolase family protein                      | FIG00007658 | idu(1);Gentisare_degradation<br>idu(1);Pterin_carbinolamine_dehydra<br>tase<br>idu(1);Salicylate_and_gentisate_cata<br>bolism |
| fig 6666666.28482.peg.2012 | Contig_19 | 30843 | 29698 | - | 2,3-dihydroxybiphenyl<br>1,2-dioxygenase                             | FIG00004009 | ff                                                                                                                            |
| fig 6666666.28482.peg.2013 | Contig_19 | 31306 | 31695 | + | membrane protein,<br>MmpS family                                     |             |                                                                                                                               |
| fig 6666666.28482.peg.2014 | Contig_19 | 31692 | 34625 | + | Putative membrane<br>protein                                         |             |                                                                                                                               |
| fig 6666666.28482.peg.2015 | Contig_19 | 34806 | 34672 | - | hypothetical protein                                                 |             |                                                                                                                               |

|                            |           |       |       |   |                                                                                                                      |             |                                                                                                                       |
|----------------------------|-----------|-------|-------|---|----------------------------------------------------------------------------------------------------------------------|-------------|-----------------------------------------------------------------------------------------------------------------------|
| fig 6666666.28482.peg.2016 | Contig_19 | 35271 | 36599 | + | NADH dehydrogenase (EC 1.6.99.3)                                                                                     | FIG00008708 | idu(6);Respiratory_dehydrogenases_1<br>idu(6);PPE_gene_cluster_in_Mycobacteria<br>idu(6);Riboflavin_synthesis_cluster |
| fig 6666666.28482.peg.2017 | Contig_19 | 40490 | 36657 | - | signal transduction histidine kinase                                                                                 |             |                                                                                                                       |
| fig 6666666.28482.peg.2018 | Contig_19 | 40840 | 42351 | + | Adenylate cyclase (EC 4.6.1.1)                                                                                       | FIG00001294 | idu(25);cAMP_signaling_in_bacteria                                                                                    |
| fig 6666666.28482.peg.2019 | Contig_19 | 42643 | 42413 | - | hypothetical protein                                                                                                 |             |                                                                                                                       |
| fig 6666666.28482.peg.2020 | Contig_19 | 42978 | 42847 | - | hypothetical protein                                                                                                 |             |                                                                                                                       |
| fig 6666666.28482.peg.2021 | Contig_19 | 43021 | 44409 | + | Succinate-semialdehyde dehydrogenase [NAD] (EC 1.2.1.24); Succinate-semialdehyde dehydrogenase [NADP+] (EC 1.2.1.16) | FIG01959002 | ff                                                                                                                    |
| fig 6666666.28482.peg.2022 | Contig_19 | 44449 | 46149 | + | Pyruvate decarboxylase (EC 4.1.1.1); Alpha-keto-acid decarboxylase (EC 4.1.1.-)                                      | FIG00001998 | idu(2);Pyruvate_metabolism_II:_acetyl-CoA,_acetogenesis_from_pyruvate                                                 |
| fig 6666666.28482.peg.2023 | Contig_19 | 46595 | 46263 | - | hypothetical protein                                                                                                 |             |                                                                                                                       |
| fig 6666666.28482.peg.2024 | Contig_19 | 46786 | 46655 | - | hypothetical protein                                                                                                 |             |                                                                                                                       |
| fig 6666666.28482.peg.2025 | Contig_19 | 48249 | 47002 | - | glycosyltransferase, putative                                                                                        | FIG01227982 | ff                                                                                                                    |
| fig 6666666.28482.peg.2026 | Contig_19 | 48595 | 49275 | + | hypothetical protein                                                                                                 |             |                                                                                                                       |
| fig 6666666.28482.peg.2027 | Contig_19 | 49576 | 49319 | - | hypothetical protein                                                                                                 |             |                                                                                                                       |

|                            |           |       |       |   |                                                                                                                                |             |                                                                                                                                              |
|----------------------------|-----------|-------|-------|---|--------------------------------------------------------------------------------------------------------------------------------|-------------|----------------------------------------------------------------------------------------------------------------------------------------------|
| fig 6666666.28482.peg.2028 | Contig_19 | 52213 | 49973 | - | Transmembrane transport protein MmpL13b                                                                                        | FIG01314334 | ff                                                                                                                                           |
| fig 6666666.28482.peg.2029 | Contig_19 | 53322 | 52210 | - | Chalcone synthase (EC 2.3.1.74)                                                                                                | FIG00443156 | ff                                                                                                                                           |
| fig 6666666.28482.peg.2030 | Contig_19 | 55113 | 53344 | - | Long-chain-fatty-acid--CoA ligase (EC 6.2.1.3)                                                                                 | FIG00018699 | idu(72);n-Phenylalkanoic_acid_degradation idu(72);Fatty_acid_metabolism_cluster idu(72);Biotin_synthesis_cluster idu(72);Biotin_biosynthesis |
| fig 6666666.28482.peg.2031 | Contig_19 | 55376 | 55110 | - | hypothetical protein                                                                                                           |             |                                                                                                                                              |
| fig 6666666.28482.peg.2032 | Contig_19 | 55747 | 55598 | - | hypothetical protein                                                                                                           |             |                                                                                                                                              |
| fig 6666666.28482.peg.2033 | Contig_19 | 55910 | 55770 | - | hypothetical protein                                                                                                           |             |                                                                                                                                              |
| fig 6666666.28482.peg.2034 | Contig_19 | 56399 | 56034 | - | hypothetical protein                                                                                                           |             |                                                                                                                                              |
| fig 6666666.28482.peg.2035 | Contig_19 | 56694 | 57530 | + | secreted lipase                                                                                                                |             |                                                                                                                                              |
| fig 6666666.28482.peg.2036 | Contig_19 | 57842 | 58897 | + | putative surface layer protein                                                                                                 |             |                                                                                                                                              |
| fig 6666666.28482.peg.2037 | Contig_19 | 59810 | 59055 | - | hypothetical protein                                                                                                           | FIG00638284 | ff                                                                                                                                           |
| fig 6666666.28482.peg.2038 | Contig_19 | 59921 | 60280 | + | hypothetical protein                                                                                                           |             |                                                                                                                                              |
| fig 6666666.28482.peg.2039 | Contig_19 | 60363 | 60638 | + | FIG00822349: hypothetical protein                                                                                              | FIG00822348 | ff                                                                                                                                           |
| fig 6666666.28482.peg.2040 | Contig_19 | 60721 | 63078 | + | Lead, cadmium, zinc and mercury transporting ATPase (EC 3.6.3.3) (EC 3.6.3.5); Copper-translocating P-type ATPase (EC 3.6.3.4) | FIG00658111 | idu(1);CBSS-196620.1.peg.2477 idu(1);Copper_homeostasis                                                                                      |
| fig 6666666.28482.peg.2041 | Contig_19 | 63090 | 63332 | + | hypothetical protein                                                                                                           |             |                                                                                                                                              |
| fig 6666666.28482.peg.2042 | Contig_19 | 63403 | 63981 | + | FIG00826235: hypothetical protein                                                                                              | FIG00826234 | ff                                                                                                                                           |

|                            |           |       |       |   |                                                             |             |                                                                                                                                              |
|----------------------------|-----------|-------|-------|---|-------------------------------------------------------------|-------------|----------------------------------------------------------------------------------------------------------------------------------------------|
| fig 6666666.28482.peg.2043 | Contig_19 | 65553 | 63991 | - | 3-phytase precursor (EC 3.1.3.8)                            | FIG01041340 | ff                                                                                                                                           |
| fig 6666666.28482.peg.2044 | Contig_19 | 66397 | 65624 | - | FIG00823602:<br>hypothetical protein                        | FIG00823600 | ff                                                                                                                                           |
| fig 6666666.28482.peg.2045 | Contig_19 | 67672 | 66446 | - | 3-demethylubiquinone-9<br>3-methyltransferase (EC 2.1.1.64) | FIG00030029 | ff                                                                                                                                           |
| fig 6666666.28482.peg.2046 | Contig_19 | 67791 | 68153 | + | FIG00828335:<br>hypothetical protein                        | FIG00828334 | ff                                                                                                                                           |
| fig 6666666.28482.peg.2047 | Contig_19 | 68684 | 68280 | - | hypothetical protein                                        |             |                                                                                                                                              |
| fig 6666666.28482.peg.2048 | Contig_19 | 69363 | 68878 | - | Lactoylglutathione lyase (EC 4.4.1.5)                       | FIG00004743 | idu(1);Glutathione:_Non-redox_reactions<br>idu(1);Methylglyoxal_Metabolism                                                                   |
| fig 6666666.28482.peg.2049 | Contig_19 | 69747 | 69388 | - | Arsenate reductase (EC 1.20.4.1)                            | FIG00000770 | icw(1);Transcription_repair_cluster<br>icw(1);CBSS-315749.4.peg.3658<br>icw(2);Arsenic_resistance<br>icw(1);Anaerobic_respiratory_reductases |
| fig 6666666.28482.peg.2050 | Contig_19 | 70900 | 69794 | - | Arsenate reductase (EC 1.20.4.1)                            | FIG00000770 | icw(1);Transcription_repair_cluster<br>icw(1);CBSS-315749.4.peg.3658<br>icw(2);Arsenic_resistance<br>icw(1);Anaerobic_respiratory_reductases |
| fig 6666666.28482.peg.2051 | Contig_19 | 71223 | 70897 | - | Arsenical resistance operon repressor                       |             | idu(1);Arsenic_resistance                                                                                                                    |
| fig 6666666.28482.peg.2052 | Contig_19 | 72016 | 72483 | + | hypothetical protein                                        |             |                                                                                                                                              |
| fig 6666666.28482.peg.2053 | Contig_19 | 72596 | 72781 | + | hypothetical protein                                        |             |                                                                                                                                              |
| fig 6666666.28482.peg.2054 | Contig_19 | 74306 | 73023 | - | phage-related major capsid protein                          |             |                                                                                                                                              |

|                            |           |       |       |   |                                                                 |                                           |
|----------------------------|-----------|-------|-------|---|-----------------------------------------------------------------|-------------------------------------------|
| fig 6666666.28482.peg.2055 | Contig_19 | 74292 | 74519 | + | hypothetical protein                                            |                                           |
| fig 6666666.28482.peg.2056 | Contig_19 | 74922 | 74590 | - | hypothetical protein                                            |                                           |
| fig 6666666.28482.peg.2057 | Contig_19 | 75158 | 74919 | - | hypothetical protein                                            |                                           |
| fig 6666666.28482.peg.2058 | Contig_19 | 75388 | 75155 | - | hypothetical protein                                            |                                           |
| fig 6666666.28482.peg.2059 | Contig_19 | 76010 | 75720 | - | hypothetical protein                                            |                                           |
| fig 6666666.28482.peg.2060 | Contig_19 | 76273 | 76007 | - | hypothetical protein                                            |                                           |
| fig 6666666.28482.peg.2061 | Contig_19 | 76560 | 76270 | - | hypothetical protein                                            |                                           |
| fig 6666666.28482.peg.2062 | Contig_19 | 77969 | 76557 | - | hypothetical protein                                            | FIG00638284 ff                            |
| fig 6666666.28482.peg.2063 | Contig_19 | 78493 | 78335 | - | hypothetical protein                                            |                                           |
| fig 6666666.28482.peg.2064 | Contig_19 | 78643 | 79257 | + | hypothetical protein                                            |                                           |
| fig 6666666.28482.peg.2065 | Contig_19 | 79254 | 80480 | + | site-specific<br>recombinase, phage<br>integrase family protein |                                           |
|                            |           |       |       |   |                                                                 |                                           |
| fig 6666666.28482.rna.31   | Contig_19 | 80593 | 80520 | - | tRNA-Leu-TAA                                                    |                                           |
| fig 6666666.28482.peg.2066 | Contig_19 | 80953 | 81801 | + | PPE family protein                                              | icw(1);CBSS-164757.7.peg.5020             |
| fig 6666666.28482.peg.2067 | Contig_19 | 81910 | 83046 | + | PPE family protein                                              | FIG00013075 icw(1);CBSS-164757.7.peg.5020 |
| fig 6666666.28482.peg.2068 | Contig_2  | 2017  | 77    | - | Acyl-coenzyme A oxidase<br>3, peroxisomal (EC<br>1.3.3.6)       | FIG00826267 ff                            |
|                            |           |       |       |   |                                                                 |                                           |
| fig 6666666.28482.peg.2069 | Contig_2  | 2159  | 2725  | + | Putative protein-S-<br>isoprenylcysteine<br>methyltransferase   |                                           |
| fig 6666666.28482.peg.2070 | Contig_2  | 4994  | 2709  | - | FIG00820139:<br>hypothetical protein                            | FIG00820138 ff                            |
| fig 6666666.28482.peg.2071 | Contig_2  | 5660  | 5163  | - | Transcriptional regulator,<br>MarR family                       | FIG00554610 ff                            |

|                            |          |       |       |   |                                                                                                                                                                         |             |                                                                                                            |
|----------------------------|----------|-------|-------|---|-------------------------------------------------------------------------------------------------------------------------------------------------------------------------|-------------|------------------------------------------------------------------------------------------------------------|
| fig 6666666.28482.peg.2072 | Contig_2 | 5749  | 7836  | + | Candidate substrate-specific domain of ECF transporters in Mycobacteria / Duplicated ATPase component of energizing module of predicted ECF transporter in Mycobacteria | FIG00108957 | isu;ECF_class_transporters<br>icw(1);ECF_class_transporters                                                |
| fig 6666666.28482.peg.2073 | Contig_2 | 7890  | 8684  | + | Transmembrane component of energizing module of ECF transporters in Mycobacteria                                                                                        | FIG00143223 | icw(1);ECF_class_transporters                                                                              |
| fig 6666666.28482.peg.2074 | Contig_2 | 8744  | 9139  | + | hypothetical protein                                                                                                                                                    | FIG00001198 | isu;Sulfatases_and_sulfatase_modifying_factor_1<br>isu;Choline_and_Betaine_Uptake_and_Betaine_Biosynthesis |
| fig 6666666.28482.peg.2075 | Contig_2 | 9132  | 10952 | + | Choline-sulfatase (EC 3.1.6.6)                                                                                                                                          |             |                                                                                                            |
| fig 6666666.28482.peg.2076 | Contig_2 | 11587 | 10991 | - | transcriptional regulator, TetR family                                                                                                                                  | FIG01956023 | ff                                                                                                         |
| fig 6666666.28482.peg.2077 | Contig_2 | 11872 | 11747 | - | hypothetical protein                                                                                                                                                    |             |                                                                                                            |
| fig 6666666.28482.peg.2078 | Contig_2 | 11937 | 12710 | + | integral membrane protein                                                                                                                                               |             |                                                                                                            |
| fig 6666666.28482.peg.2079 | Contig_2 | 12707 | 13654 | + | Hydrolase, alpha/beta fold family protein                                                                                                                               | FIG00002156 | icw(1);Dimethylarginine_metabolism                                                                         |
| fig 6666666.28482.peg.2080 | Contig_2 | 14078 | 13632 | - | Transcriptional regulator, AsnC family                                                                                                                                  |             |                                                                                                            |
| fig 6666666.28482.peg.2081 | Contig_2 | 14259 | 15032 | + | NG,NG-dimethylarginine dimethylaminohydrolase 1 (EC 3.5.3.18)                                                                                                           |             |                                                                                                            |

|                            |          |       |       |   |                                                                                   |             |                                                                               |
|----------------------------|----------|-------|-------|---|-----------------------------------------------------------------------------------|-------------|-------------------------------------------------------------------------------|
| fig 6666666.28482.peg.2082 | Contig_2 | 15029 | 16264 | + | Ornithine<br>aminotransferase (EC<br>2.6.1.13)                                    | FIG00035201 | isu;Arginine_and_Ornithine_Degrada<br>tion<br>isu;Dimethylarginine_metabolism |
| fig 6666666.28482.peg.2083 | Contig_2 | 16294 | 17724 | + | Cationic amino acid<br>transport integral<br>membrane protein RocE                | FIG01357586 | ff                                                                            |
| fig 6666666.28482.peg.2084 | Contig_2 | 17721 | 18599 | + | Universal stress protein<br>family                                                | FIG00017615 | ff                                                                            |
| fig 6666666.28482.peg.2085 | Contig_2 | 19649 | 18684 | - | FIG00821598:<br>hypothetical membrane<br>protein                                  |             |                                                                               |
| fig 6666666.28482.peg.2086 | Contig_2 | 21020 | 19728 | - | Periplasmic sugar-binding<br>lipoprotein UspC                                     | FIG01316674 | ff                                                                            |
| fig 6666666.28482.peg.2087 | Contig_2 | 21889 | 21065 | - | Inositol transport system<br>permease protein                                     | FIG00008562 | ff                                                                            |
| fig 6666666.28482.peg.2088 | Contig_2 | 22760 | 21876 | - | Multiple sugar ABC<br>transporter, membrane-<br>spanning permease<br>protein MsmF | FIG00007586 | ff                                                                            |
| fig 6666666.28482.peg.2089 | Contig_2 | 23677 | 22943 | - | hypothetical protein                                                              | FIG00638284 | ff                                                                            |
| fig 6666666.28482.peg.2090 | Contig_2 | 24714 | 23722 | - | Glutamine-transport ATP-<br>binding protein ABC<br>transporter GlnQ               |             |                                                                               |
| fig 6666666.28482.peg.2091 | Contig_2 | 25778 | 24717 | - | Glutamine-transport<br>transmembrane protein<br>ABC transporter                   |             |                                                                               |
| fig 6666666.28482.peg.2092 | Contig_2 | 27090 | 26260 | - | DNA-binding protein                                                               |             |                                                                               |

|                            |          |       |       |   |                                                           |             |                                                                                                                                                                                                                                                                                                                                                   |
|----------------------------|----------|-------|-------|---|-----------------------------------------------------------|-------------|---------------------------------------------------------------------------------------------------------------------------------------------------------------------------------------------------------------------------------------------------------------------------------------------------------------------------------------------------|
| fig 6666666.28482.peg.2093 | Contig_2 | 27933 | 27100 | - | DNA-binding protein                                       |             |                                                                                                                                                                                                                                                                                                                                                   |
| fig 6666666.28482.peg.2094 | Contig_2 | 29542 | 28016 | - | hypothetical protein                                      |             |                                                                                                                                                                                                                                                                                                                                                   |
| fig 6666666.28482.peg.2095 | Contig_2 | 30317 | 29553 | - | 3-oxoacyl-[acyl-carrier protein] reductase (EC 1.1.1.100) | FIG00621114 | idu(38);CBSS-246196.1.peg.364<br>idu(38);CBSS-164757.7.peg.5020<br>idu(38);Fatty_Acid_Biosynthesis_FASI<br>I                                                                                                                                                                                                                                      |
| fig 6666666.28482.peg.2096 | Contig_2 | 30617 | 31204 | + | hypothetical protein                                      |             |                                                                                                                                                                                                                                                                                                                                                   |
| fig 6666666.28482.peg.2097 | Contig_2 | 31461 | 32681 | + | Glutaryl-CoA dehydrogenase (EC 1.3.99.7)                  | FIG01332484 | ff                                                                                                                                                                                                                                                                                                                                                |
| fig 6666666.28482.peg.2098 | Contig_2 | 32695 | 33936 | + | Hydroxyproline dehydratase putative                       | FIG01390869 | ff                                                                                                                                                                                                                                                                                                                                                |
| fig 6666666.28482.peg.2099 | Contig_2 | 33933 | 34715 | + | Enoyl-CoA hydratase (EC 4.2.1.17)                         | FIG00033206 | idu(51);n-Phenylalkanoic_acid_degradation<br>idu(51);Polyhydroxybutyrate_metabolism<br>idu(51);Isoleucine_degradation<br>idu(51);Fatty_acid_metabolism_cluster<br>idu(51);Lysine_fermentation<br>idu(51);Butanol_Biosynthesis<br>idu(51);Acetyl-CoA_fermentation_to_Butyrate<br>idu(51);Valine_degradation<br>idu(51);Butyrate_metabolism_cluster |

|                            |          |       |       |   |                                               |             |                                                                                                                                                                                                                                                                               |
|----------------------------|----------|-------|-------|---|-----------------------------------------------|-------------|-------------------------------------------------------------------------------------------------------------------------------------------------------------------------------------------------------------------------------------------------------------------------------|
| fig 6666666.28482.peg.2100 | Contig_2 | 34765 | 35706 | + | 3-hydroxyacyl-CoA dehydrogenase (EC 1.1.1.35) | FIG00001558 | icw(2);n-Phenylalkanoic_acid_degradation<br>icw(2);Polyhydroxybutyrate_metaboli<br>sm icw(2);Isoleucine_degradation<br>icw(2);Fatty_acid_metabolism_cluste<br>r icw(2);Acetyl-CoA_fermentation_to_Butyrate<br>icw(2);Valine_degradation<br>icw(2);Butyrate_metabolism_cluster |
| fig 6666666.28482.peg.2101 | Contig_2 | 35703 | 35816 | + | hypothetical protein                          |             |                                                                                                                                                                                                                                                                               |
| fig 6666666.28482.peg.2102 | Contig_2 | 35896 | 36795 | + | hypothetical protein                          | FIG00638284 | ff                                                                                                                                                                                                                                                                            |
| fig 6666666.28482.peg.2103 | Contig_2 | 36792 | 38183 | + | NADH dehydrogenase (EC 1.6.99.3)              | FIG00008708 | idu(6);Respiratory_dehydrogenases_<br>1<br>idu(6);PPE_gene_cluster_in_Mycobac<br>teria<br>idu(6);Riboflavin_synthesis_cluster                                                                                                                                                 |

|                            |          |       |       |   |                                                                                                  |             |                                                                                                                                                                                                                                                                                                                                                                                                                                 |
|----------------------------|----------|-------|-------|---|--------------------------------------------------------------------------------------------------|-------------|---------------------------------------------------------------------------------------------------------------------------------------------------------------------------------------------------------------------------------------------------------------------------------------------------------------------------------------------------------------------------------------------------------------------------------|
| fig 6666666.28482.peg.2104 | Contig_2 | 38202 | 39089 | + | 3-hydroxybutyryl-CoA dehydrogenase (EC 1.1.1.157); 3-hydroxyacyl-CoA dehydrogenase (EC 1.1.1.35) | FIG00000819 | icw(2);n-Phenylalkanoic_acid_degradation<br>icw(2);Polyhydroxybutyrate_metabolism<br>icw(2);Polyhydroxybutyrate_metabolism<br>icw(2);Isoleucine_degradation<br>icw(2);Fatty_acid_metabolism_cluster<br>icw(1);Lysine_fermentation<br>icw(1);Butanol_Biosynthesis<br>icw(1);Acetyl-CoA_fermentation_to_Butyrate<br>icw(2);Acetyl-CoA_fermentation_to_Butyrate<br>icw(2);Valine_degradation<br>icw(2);Butyrate_metabolism_cluster |
| fig 6666666.28482.peg.2105 | Contig_2 | 39106 | 39855 | + | hypothetical protein                                                                             |             |                                                                                                                                                                                                                                                                                                                                                                                                                                 |
| fig 6666666.28482.peg.2106 | Contig_2 | 40153 | 40965 | + | hypothetical protein                                                                             | FIG00638284 | ff                                                                                                                                                                                                                                                                                                                                                                                                                              |
| fig 6666666.28482.peg.2107 | Contig_2 | 40978 | 41484 | + | hypothetical protein                                                                             |             |                                                                                                                                                                                                                                                                                                                                                                                                                                 |
| fig 6666666.28482.peg.2108 | Contig_2 | 41645 | 43162 | + | TldD family protein, Actinobacterial subgroup                                                    | FIG00018909 | idu(1);CBSS-316273.3.peg.448<br>idu(1);Putative_TldE-TldD_proteolytic_complex                                                                                                                                                                                                                                                                                                                                                   |
| fig 6666666.28482.peg.2109 | Contig_2 | 43159 | 44532 | + | TldE/PmbA family protein, Actinobacterial subgroup                                               | FIG00020189 | icw(1);CBSS-316273.3.peg.448<br>icw(1);Putative_TldE-TldD_proteolytic_complex                                                                                                                                                                                                                                                                                                                                                   |
| fig 6666666.28482.peg.2110 | Contig_2 | 44597 | 45370 | + | FIG00821236: hypothetical protein                                                                | FIG00821235 | ff                                                                                                                                                                                                                                                                                                                                                                                                                              |
| fig 6666666.28482.peg.2111 | Contig_2 | 45562 | 45431 | - | hypothetical protein                                                                             |             |                                                                                                                                                                                                                                                                                                                                                                                                                                 |
| fig 6666666.28482.rna.32   | Contig_2 | 46468 | 46541 | + | tRNA-Met-CAT                                                                                     |             |                                                                                                                                                                                                                                                                                                                                                                                                                                 |

|                            |          |       |       |   |                                                                 |             |                               |
|----------------------------|----------|-------|-------|---|-----------------------------------------------------------------|-------------|-------------------------------|
| fig 6666666.28482.peg.2112 | Contig_2 | 49360 | 48761 | - | hypothetical protein                                            |             |                               |
| fig 6666666.28482.peg.2113 | Contig_2 | 53094 | 51814 | - | Predicted protein kinase                                        |             |                               |
| fig 6666666.28482.peg.2114 | Contig_2 | 53119 | 53253 | + | hypothetical protein                                            |             |                               |
| fig 6666666.28482.peg.2115 | Contig_2 | 53495 | 54646 | + | putative cytochrome P450 hydroxylase                            | FIG00032437 | idu(49);Nitric_oxide_synthase |
| fig 6666666.28482.peg.2116 | Contig_2 | 54984 | 56297 | + | Nitrilotriacetate monooxygenase component A (EC 1.14.13.-)      | FIG01346536 | ff                            |
| fig 6666666.28482.peg.2117 | Contig_2 | 56568 | 56401 | - | hypothetical protein                                            |             |                               |
| fig 6666666.28482.peg.2118 | Contig_2 | 56725 | 57639 | + | PE-PGRS FAMILY PROTEIN                                          |             |                               |
| fig 6666666.28482.peg.2119 | Contig_2 | 59008 | 58373 | - | hypothetical protein                                            | FIG00638284 | ff                            |
| fig 6666666.28482.peg.2120 | Contig_2 | 59368 | 59156 | - | hypothetical protein                                            |             |                               |
| fig 6666666.28482.peg.2121 | Contig_2 | 59990 | 60244 | + | putative major facilitator superfamily protein                  | FIG01331046 | ff                            |
| fig 6666666.28482.peg.2122 | Contig_2 | 60451 | 62106 | + | hypothetical protein                                            |             |                               |
| fig 6666666.28482.peg.2123 | Contig_2 | 62279 | 63427 | + | Threonine dehydrogenase and related Zn-dependent dehydrogenases | FIG00053044 | idu(2);Threonine_degradation  |
| fig 6666666.28482.peg.2124 | Contig_2 | 63446 | 64057 | + | hypothetical protein                                            | FIG00638284 | ff                            |
| fig 6666666.28482.peg.2125 | Contig_2 | 64408 | 64115 | - | low molecular weight T-cell antigen TB8.4                       |             |                               |
| fig 6666666.28482.peg.2126 | Contig_2 | 64776 | 64405 | - | hypothetical protein                                            |             |                               |
| fig 6666666.28482.peg.2127 | Contig_2 | 66621 | 65581 | - | protein of unknown function UPF0118                             | FIG00628027 | ff                            |
| fig 6666666.28482.peg.2128 | Contig_2 | 67477 | 66755 | - | hypothetical protein                                            |             |                               |
| fig 6666666.28482.peg.2129 | Contig_2 | 68101 | 67775 | - | hypothetical protein                                            |             |                               |
| fig 6666666.28482.peg.2130 | Contig_2 | 70060 | 68333 | - | hypothetical protein                                            | FIG00638284 | ff                            |

|                            |          |       |       |   |                                                 |             |                                                                                                                                                |
|----------------------------|----------|-------|-------|---|-------------------------------------------------|-------------|------------------------------------------------------------------------------------------------------------------------------------------------|
| fig 6666666.28482.peg.2131 | Contig_2 | 71473 | 70460 | - | putative transcriptional regulator, AraC family |             |                                                                                                                                                |
| fig 6666666.28482.peg.2132 | Contig_2 | 71721 | 71939 | + | hypothetical protein                            |             |                                                                                                                                                |
| fig 6666666.28482.peg.2133 | Contig_2 | 72145 | 72008 | - | hypothetical protein                            |             |                                                                                                                                                |
| fig 6666666.28482.peg.2134 | Contig_2 | 72300 | 72860 | + | ThiJ/Pfpl family protein                        | FIG00015923 | icw(1);CBSS-176280.1.peg.1561                                                                                                                  |
| fig 6666666.28482.peg.2135 | Contig_2 | 73188 | 73445 | + | hypothetical protein                            |             |                                                                                                                                                |
| fig 6666666.28482.peg.2136 | Contig_2 | 73469 | 74026 | + | ThiJ/Pfpl family protein                        | FIG00015923 | icw(1);CBSS-176280.1.peg.1561                                                                                                                  |
| fig 6666666.28482.peg.2137 | Contig_2 | 74190 | 74486 | + | hypothetical protein                            | FIG00638284 | ff                                                                                                                                             |
| fig 6666666.28482.peg.2138 | Contig_2 | 75952 | 74573 | - | Glutamate decarboxylase (EC 4.1.1.15)           | FIG01376814 | ff                                                                                                                                             |
| fig 6666666.28482.peg.2139 | Contig_2 | 76565 | 77086 | + | Possible membrane protein                       | FIG01121868 | ff                                                                                                                                             |
| fig 6666666.28482.peg.2140 | Contig_2 | 77226 | 77666 | + | hypothetical protein                            |             |                                                                                                                                                |
| fig 6666666.28482.peg.2141 | Contig_2 | 78286 | 79023 | + | Oxidoreductase, aldo/keto reductase family      | FIG00003513 | ff                                                                                                                                             |
| fig 6666666.28482.peg.2142 | Contig_2 | 81032 | 79290 | - | Thioredoxin reductase (EC 1.8.1.9)              | FIG00018396 | idu(3);pyrimidine_conversions<br>idu(3);Thioredoxin-disulfide_reductase<br>idu(3);Glycine_reductase,_sarcosine_reductase_and_betaine_reductase |
| fig 6666666.28482.peg.2143 | Contig_2 | 81771 | 81322 | - | thioredoxin                                     | FIG00848322 | ff                                                                                                                                             |
| fig 6666666.28482.peg.2144 | Contig_2 | 84409 | 81785 | - | ClpB protein                                    | FIG00025216 | idu(1);Proteolysis_in_bacteria,_ATP-dependent idu(1);USS-DB-7<br>icw(3);Protein_chaperones<br>idu(1);Type_VI_secretion_systems                 |

|                            |          |        |        |   |                                                                                                                                      |             |                                                                               |
|----------------------------|----------|--------|--------|---|--------------------------------------------------------------------------------------------------------------------------------------|-------------|-------------------------------------------------------------------------------|
| fig 6666666.28482.peg.2145 | Contig_2 | 84708  | 84391  | - | FIG01123039:<br>hypothetical protein                                                                                                 | FIG01123038 | ff                                                                            |
| fig 6666666.28482.peg.2146 | Contig_2 | 85619  | 84705  | - | DnaJ-class molecular<br>chaperone CbpA                                                                                               | FIG00027226 | icw(2);Protein_chaperones                                                     |
| fig 6666666.28482.peg.2147 | Contig_2 | 86150  | 85626  | - | Heat shock protein GrpE                                                                                                              | FIG00000103 | icw(1);Heat_shock_dnaK_gene_clust<br>er_extended                              |
| fig 6666666.28482.peg.2148 | Contig_2 | 88040  | 86157  | - | Chaperone protein DnaK                                                                                                               | FIG00023369 | idu(1);Protein_chaperones<br>idu(1);Heat_shock_dnaK_gene_cluste<br>r_extended |
| fig 6666666.28482.peg.2149 | Contig_2 | 90013  | 88529  | - | Succinate-semialdehyde<br>dehydrogenase [NAD]<br>(EC 1.2.1.24); Succinate-<br>semialdehyde<br>dehydrogenase [NADP+]<br>(EC 1.2.1.16) | FIG01959002 | icw(1);Protein_chaperones<br>ff                                               |
| fig 6666666.28482.peg.2150 | Contig_2 | 90601  | 91758  | + | hypothetical protein                                                                                                                 | FIG00638284 | ff                                                                            |
| fig 6666666.28482.peg.2151 | Contig_2 | 91869  | 92594  | + | ThiJ/PfpI family protein                                                                                                             | FIG00015923 | idu(8);CBSS-176280.1.peg.1561                                                 |
| fig 6666666.28482.peg.2152 | Contig_2 | 92729  | 95266  | + | Excinuclease ABC subunit<br>A paralog of unknown<br>function                                                                         | FIG00133034 | isu;DNA_repair,_UvrABC_system                                                 |
| fig 6666666.28482.peg.2153 | Contig_2 | 96862  | 95339  | - | PE-PGRS FAMILY<br>PROTEIN                                                                                                            |             |                                                                               |
| fig 6666666.28482.peg.2154 | Contig_2 | 98358  | 97441  | - | hypothetical protein                                                                                                                 | FIG00638284 | ff                                                                            |
| fig 6666666.28482.peg.2155 | Contig_2 | 99612  | 98557  | - | Transcriptional regulator,<br>AraC family                                                                                            | FIG00510130 | ff                                                                            |
| fig 6666666.28482.peg.2156 | Contig_2 | 99714  | 101510 | + | FIG00828677:<br>hypothetical protein                                                                                                 | FIG00828675 | ff                                                                            |
| fig 6666666.28482.peg.2157 | Contig_2 | 102059 | 102304 | + | hypothetical protein                                                                                                                 |             |                                                                               |

|                            |          |        |        |   |                                                                                          |             |                                                                           |
|----------------------------|----------|--------|--------|---|------------------------------------------------------------------------------------------|-------------|---------------------------------------------------------------------------|
| fig 6666666.28482.peg.2158 | Contig_2 | 103041 | 102421 | - | Adenylate cyclase (EC 4.6.1.1)                                                           | FIG00001294 | idu(25);cAMP_signaling_in_bacteria                                        |
| fig 6666666.28482.peg.2159 | Contig_2 | 103922 | 103365 | - | D-alanyl-D-alanine carboxypeptidase family                                               | FIG01875983 | ff                                                                        |
| fig 6666666.28482.peg.2160 | Contig_2 | 104868 | 103984 | - | hypothetical protein                                                                     | FIG00638284 | ff<br>icw(1);CBSS-56780.10.peg.1536                                       |
| fig 6666666.28482.peg.2161 | Contig_2 | 107738 | 104988 | - | hypothetical protein                                                                     |             |                                                                           |
| fig 6666666.28482.peg.2162 | Contig_2 | 108470 | 107937 | - | Metal-dependent hydrolase YbeY, involved in rRNA and/or ribosome maturation and assembly |             |                                                                           |
| fig 6666666.28482.peg.2163 | Contig_2 | 109513 | 108467 | - | Phosphate starvation-inducible protein PhoH, predicted ATPase                            | FIG00045341 | isu;CBSS-56780.10.peg.1536<br>isu;Phosphate_metabolism                    |
| fig 6666666.28482.peg.2164 | Contig_2 | 110374 | 109571 | - | Ribosomal RNA small subunit methyltransferase E (EC 2.1.1.-)                             | FIG00000248 | icw(2);Heat_shock_dnaK_gene_cluster_extended<br>isu;RNA_methylation       |
| fig 6666666.28482.peg.2165 | Contig_2 | 111626 | 110481 | - | Chaperone protein DnaJ                                                                   | FIG00000070 | icw(1);Heat_shock_dnaK_gene_cluster_extended<br>idu(1);Protein_chaperones |
| fig 6666666.28482.peg.2166 | Contig_2 | 112740 | 111697 | - | Heat-inducible transcription repressor HrcA                                              | FIG00000544 | isu;Heat_shock_dnaK_gene_cluster_extended                                 |
| fig 6666666.28482.peg.2167 | Contig_2 | 112905 | 113219 | + | FIG00996129:<br>hypothetical protein                                                     | FIG00820392 | ff                                                                        |
| fig 6666666.28482.peg.2168 | Contig_2 | 113283 | 113879 | + | FIG00821010:<br>hypothetical protein                                                     | FIG01396054 | ff                                                                        |

|                            |          |        |        |   |                                                             |             |                                                                                                                                                   |
|----------------------------|----------|--------|--------|---|-------------------------------------------------------------|-------------|---------------------------------------------------------------------------------------------------------------------------------------------------|
| fig 6666666.28482.peg.2169 | Contig_2 | 113876 | 114757 | + | putative RNA polymerase sigma factor                        | FIG01121797 | ff                                                                                                                                                |
| fig 6666666.28482.peg.2170 | Contig_2 | 115254 | 114751 | - | Low molecular weight antigen MTB12 precursor                | FIG01312173 | ff                                                                                                                                                |
| fig 6666666.28482.peg.2171 | Contig_2 | 115884 | 115405 | - | FIG00827776:<br>hypothetical protein                        | FIG00827775 | ff                                                                                                                                                |
| fig 6666666.28482.peg.2172 | Contig_2 | 116201 | 115986 | - | Protein MbtH                                                |             |                                                                                                                                                   |
| fig 6666666.28482.peg.2173 | Contig_2 | 117486 | 116182 | - | L-lysine 6-monooxygenase MbtG (EC 1.14.13.59)               | FIG00821968 | ff                                                                                                                                                |
| fig 6666666.28482.peg.2174 | Contig_2 | 121826 | 117483 | - | Long-chain-fatty-acid--CoA ligase (EC 6.2.1.3)              | FIG00018699 | icw(1);n-Phenylalkanoic_acid_degradation<br>icw(1);Fatty_acid_metabolism_cluster<br>icw(1);Biotin_synthesis_cluster<br>icw(1);Biotin_biosynthesis |
| fig 6666666.28482.peg.2175 | Contig_2 | 126985 | 121823 | - | Long-chain-fatty-acid--CoA ligase (EC 6.2.1.3)              | FIG00018699 | icw(1);n-Phenylalkanoic_acid_degradation<br>icw(1);Fatty_acid_metabolism_cluster<br>icw(1);Biotin_synthesis_cluster<br>icw(1);Biotin_biosynthesis |
| fig 6666666.28482.peg.2176 | Contig_2 | 129942 | 126982 | - | Polyketide synthetase MbtD                                  | FIG00821155 | ff                                                                                                                                                |
| fig 6666666.28482.peg.2177 | Contig_2 | 131281 | 129968 | - | Malonyl CoA-acyl carrier protein transacylase (EC 2.3.1.39) | FIG00000319 | idu(7);Fatty_Acid_Biosynthesis_FASII                                                                                                              |

|                            |          |        |        |   |                                                                                                                        |             |                                                                       |
|----------------------------|----------|--------|--------|---|------------------------------------------------------------------------------------------------------------------------|-------------|-----------------------------------------------------------------------|
| fig 6666666.28482.peg.2178 | Contig_2 | 135494 | 131271 | - | Phenyloxazoline synthase MbtB (EC 6.3.2.-)                                                                             | FIG01192827 | ff                                                                    |
| fig 6666666.28482.peg.2179 | Contig_2 | 135597 | 137240 | + | Bifunctional salicyl-AMP ligase/salicyl-S-arcp synthetase MbtA                                                         | FIG01343285 | ff                                                                    |
| fig 6666666.28482.peg.2180 | Contig_2 | 138253 | 137237 | - | Fatty acid desaturase occurring in virulence cluster                                                                   | FIG00996037 | idu(2);Mycobacterium_virulence_operation_involved_in_lipid_metabolism |
| fig 6666666.28482.peg.2181 | Contig_2 | 139776 | 138424 | - | isochorismate synthase MbtI                                                                                            | FIG01363036 | ff                                                                    |
| fig 6666666.28482.peg.2182 | Contig_2 | 140154 | 141392 | + | putative sodium-dependent bicarbonate transporter                                                                      | FIG00102673 | icw(1);CO2_uptake,_carboxysome                                        |
| fig 6666666.28482.peg.2183 | Contig_2 | 141625 | 142869 | + | putative sodium-dependent bicarbonate transporter                                                                      | FIG00102673 | icw(1);CO2_uptake,_carboxysome                                        |
| fig 6666666.28482.peg.2184 | Contig_2 | 143402 | 145141 | + | Sulfate transporter                                                                                                    | FIG01303216 | ff                                                                    |
| fig 6666666.28482.peg.2185 | Contig_2 | 146324 | 145152 | - | Putative coproporphyrinogen III oxidase of BS HemN-type, oxygen-independent (EC 1.3.99.22), in heat shock gene cluster |             |                                                                       |
| fig 6666666.28482.peg.2186 | Contig_2 | 146778 | 146299 | - | hypothetical protein                                                                                                   | FIG00005903 | icw(1);Inorganic_Sulfur_Assimilation                                  |
| fig 6666666.28482.peg.2187 | Contig_2 | 146749 | 148428 | + | Ferredoxin--sulfite reductase, actinobacterial type (EC 1.8.7.1)                                                       |             |                                                                       |

|                            |          |        |        |   |                                                                                                                       |             |                                                                                                                                                                |
|----------------------------|----------|--------|--------|---|-----------------------------------------------------------------------------------------------------------------------|-------------|----------------------------------------------------------------------------------------------------------------------------------------------------------------|
| fig 6666666.28482.peg.2188 | Contig_2 | 148425 | 149168 | + | Phosphoadenylyl-sulfate reductase [thioredoxin] (EC 1.8.4.8) / Adenylyl-sulfate reductase [thioredoxin] (EC 1.8.4.10) | FIG01303877 | icw(1);Cysteine_Biosynthesis<br>icw(1);Inorganic_Sulfur_Assimilation<br>icw(2);Inorganic_Sulfur_Assimilation                                                   |
| fig 6666666.28482.peg.2189 | Contig_2 | 149252 | 149878 | + | Sirohydrochlorin ferrochelataase (EC 4.99.1.4)                                                                        | FIG00132864 | idu(2);Heme_and_Siroheme_Biosynthesis                                                                                                                          |
| fig 6666666.28482.peg.2190 | Contig_2 | 150054 | 149890 | - | hypothetical protein                                                                                                  | FIG00005992 | idu(2);Glutathione:_Biosynthesis_and_gamma-glutamyl_cycle<br>idu(2);Utilization_of_glutathione_as_a_sulphur_source<br>idu(2);Poly-gamma-glutamate_biosynthesis |
| fig 6666666.28482.peg.2191 | Contig_2 | 150265 | 152211 | + | Gamma-glutamyltranspeptidase (EC 2.3.2.2)                                                                             |             |                                                                                                                                                                |
| fig 6666666.28482.peg.2192 | Contig_2 | 153309 | 152218 | - | Sulfate and thiosulfate import ATP-binding protein CysA (EC 3.6.3.25)                                                 | FIG00000959 | idu(1);Uptake_of_selenate_and_selenite<br>icw(4);Cysteine_Biosynthesis<br>icw(4);Inorganic_Sulfur_Assimilation                                                 |
| fig 6666666.28482.peg.2193 | Contig_2 | 154146 | 153331 | - | Sulfate transport system permease protein CysW                                                                        | FIG01272192 | icw(1);Cysteine_Biosynthesis<br>icw(1);Inorganic_Sulfur_Assimilation                                                                                           |
| fig 6666666.28482.peg.2194 | Contig_2 | 154991 | 154146 | - | Sulfate transport system permease protein CysT                                                                        | FIG00018897 | icw(2);Cysteine_Biosynthesis<br>icw(2);Inorganic_Sulfur_Assimilation                                                                                           |
| fig 6666666.28482.peg.2195 | Contig_2 | 156034 | 154988 | - | Sulfate and thiosulfate binding protein CysP                                                                          | FIG00001000 | idu(2);Cysteine_Biosynthesis<br>idu(2);Inorganic_Sulfur_Assimilation                                                                                           |
| fig 6666666.28482.peg.2196 | Contig_2 | 156541 | 156347 | - | hypothetical protein                                                                                                  |             |                                                                                                                                                                |

|                            |           |        |        |   |                                                       |             |                                                                                           |
|----------------------------|-----------|--------|--------|---|-------------------------------------------------------|-------------|-------------------------------------------------------------------------------------------|
| fig 6666666.28482.peg.2197 | Contig_2  | 156635 | 158686 | + | Glucoamylase (EC 3.2.1.3)                             | FIG00012589 | isu;Trehalose_Biosynthesis<br>isu;Maltose_and_Maltodextrin_Utilization                    |
| fig 6666666.28482.peg.2198 | Contig_2  | 159446 | 158709 | - | PROBABLE CONSERVED LIPOPROTEIN LPPR                   | FIG01415001 | ff                                                                                        |
| fig 6666666.28482.peg.2199 | Contig_2  | 160401 | 159634 | - | PROBABLE CONSERVED LIPOPROTEIN LPPR                   | FIG01415001 | ff                                                                                        |
| fig 6666666.28482.peg.2200 | Contig_2  | 162341 | 160404 | - | Translation elongation factor LepA                    | FIG00000165 | isu;Heat_shock_dnaK_gene_cluster_extended<br>isu;Translation_elongation_factors_bacterial |
| fig 6666666.28482.peg.2201 | Contig_2  | 162369 | 162947 | + | RNA 3'-terminal phosphate cyclase (EC 6.5.1.4)        | FIG00002119 | isu;RNA_3'-terminal_phosphate_cyclase<br>isu;tRNA_splicing                                |
| fig 6666666.28482.peg.2202 | Contig_2  | 163402 | 162974 | - | Inosine-5'-monophosphate dehydrogenase (EC 1.1.1.205) | FIG00020613 | idu(4);Purine_conversions<br>idu(4);Purine_salvage_cluster                                |
| fig 6666666.28482.peg.2203 | Contig_2  | 163576 | 164418 | + | metallo-beta-lactamase family protein                 | FIG00882049 | ff                                                                                        |
| fig 6666666.28482.peg.2204 | Contig_2  | 165058 | 164402 | - | hypothetical protein                                  |             |                                                                                           |
| fig 6666666.28482.peg.2205 | Contig_2  | 165216 | 165710 | + | Transcriptional regulator, MarR family                |             |                                                                                           |
| fig 6666666.28482.peg.2206 | Contig_20 | 130    | 1626   | + | hypothetical protein                                  | FIG00638284 | ff                                                                                        |

|                            |           |      |      |   |                                                                                   |             |                                                                                                                                                                                                                                                                |
|----------------------------|-----------|------|------|---|-----------------------------------------------------------------------------------|-------------|----------------------------------------------------------------------------------------------------------------------------------------------------------------------------------------------------------------------------------------------------------------|
| fig 6666666.28482.peg.2207 | Contig_20 | 2773 | 1709 | - | N-succinyl-L,L-diaminopimelate desuccinylase (EC 3.5.1.18)                        | FIG00133108 | isu;Lysine_Biosynthesis_DAP_Pathway,_GJO_scratch<br>isu;Arginine_Biosynthesis_--_gjo<br>isu;A_Glutathione-dependent_Thiol_Reductase_Associated_with_a_Step_in_Lysine_Biosynthesis<br>isu;Lysine_Biosynthesis_DAP_Pathway<br>isu;Arginine_Biosynthesis_extended |
| fig 6666666.28482.peg.2208 | Contig_20 | 2818 | 3771 | + | 2,3,4,5-tetrahydropyridine-2,6-dicarboxylate N-succinyltransferase (EC 2.3.1.117) | FIG00000908 | icw(1);Lysine_Biosynthesis_DAP_Pathway,_GJO_scratch<br>icw(1);Lysine_Biosynthesis_DAP_Pathway                                                                                                                                                                  |
| fig 6666666.28482.peg.2209 | Contig_20 | 5074 | 3773 | - | Permeases of the major facilitator superfamily                                    | FIG00613966 | ff                                                                                                                                                                                                                                                             |
| fig 6666666.28482.peg.2210 | Contig_20 | 6687 | 5257 | - | Long-chain-fatty-acid--CoA ligase (EC 6.2.1.3)                                    | FIG00018699 | idu(72);n-Phenylalkanoic_acid_degradation<br>idu(72);Fatty_acid_metabolism_cluster<br>idu(72);Biotin_synthesis_cluster<br>idu(72);Biotin_biosynthesis                                                                                                          |
| fig 6666666.28482.peg.2211 | Contig_20 | 7608 | 6697 | - | FIG00825538:<br>hypothetical protein                                              | FIG00825535 | ff                                                                                                                                                                                                                                                             |
| fig 6666666.28482.peg.2212 | Contig_20 | 9179 | 7710 | - | Betaine aldehyde dehydrogenase (EC 1.2.1.8)                                       | FIG01304892 | idu(1);Choline_uptake_and_conversion_to_betaine_clusters<br>idu(1);Choline_and_Betaine_Uptake_and_Betaine_Biosynthesis                                                                                                                                         |

|                            |           |       |       |   |                                                                       |             |                                                                                                                                          |
|----------------------------|-----------|-------|-------|---|-----------------------------------------------------------------------|-------------|------------------------------------------------------------------------------------------------------------------------------------------|
| fig 6666666.28482.peg.2213 | Contig_20 | 9426  | 9974  | + | FIG00820262:<br>hypothetical protein                                  | FIG00820260 | ff                                                                                                                                       |
| fig 6666666.28482.peg.2214 | Contig_20 | 9974  | 10384 | + | Acetyl-CoA<br>acetyltransferase                                       | FIG01005417 | ff                                                                                                                                       |
| fig 6666666.28482.peg.2215 | Contig_20 | 10381 | 10821 | + | involved in the lipid<br>metabolism                                   | FIG01582522 | ff                                                                                                                                       |
| fig 6666666.28482.peg.2216 | Contig_20 | 10818 | 11987 | + | putative thiolase                                                     | FIG01122915 | ff                                                                                                                                       |
| fig 6666666.28482.peg.2217 | Contig_20 | 11984 | 12586 | + | Transcriptional regulator,<br>TetR family                             | FIG00554417 | ff                                                                                                                                       |
| fig 6666666.28482.peg.2218 | Contig_20 | 13336 | 12590 | - | metallo-beta-lactamase<br>family protein                              |             |                                                                                                                                          |
| fig 6666666.28482.peg.2219 | Contig_20 | 14420 | 13452 | - | Proline dehydrogenase<br>(EC 1.5.99.8) (Proline<br>oxidase)           | FIG00002570 | isu;Respiratory_dehydrogenases_1<br>isu;Proline,_4-<br>hydroxyproline_uptake_and_utilizati<br>on                                         |
| fig 6666666.28482.peg.2220 | Contig_20 | 16051 | 14420 | - | Delta-1-pyrroline-5-<br>carboxylate<br>dehydrogenase (EC<br>1.5.1.12) | FIG00043720 | isu;Arginine_and_Ornithine_Degrada<br>tion isu;CBSS-196620.1.peg.2477<br>icw(1);Proline,_4-<br>hydroxyproline_uptake_and_utilizati<br>on |
| fig 6666666.28482.peg.2221 | Contig_20 | 16136 | 17716 | + | Regulator of polyketide<br>synthase expression                        | FIG00056421 | ff                                                                                                                                       |
| fig 6666666.28482.peg.2222 | Contig_20 | 18002 | 18490 | + | PE-PGRS FAMILY<br>PROTEIN                                             |             |                                                                                                                                          |
| fig 6666666.28482.peg.2223 | Contig_20 | 19347 | 18595 | - | FIG025093: Probable<br>membrane protein                               |             | idu(2);Mycobacterium_virulence_ope<br>ron_involved_in_protein_synthesis_(<br>SSU_ribosomal_proteins)                                     |
| fig 6666666.28482.peg.2224 | Contig_20 | 19811 | 19482 | - | FIG00826766:<br>hypothetical protein                                  |             |                                                                                                                                          |

|                            |           |       |       |   |                                                                                                       |             |                                                                                                                                                                                                                            |
|----------------------------|-----------|-------|-------|---|-------------------------------------------------------------------------------------------------------|-------------|----------------------------------------------------------------------------------------------------------------------------------------------------------------------------------------------------------------------------|
| fig 6666666.28482.peg.2225 | Contig_20 | 20497 | 19928 | - | hypothetical protein                                                                                  |             |                                                                                                                                                                                                                            |
| fig 6666666.28482.peg.2226 | Contig_20 | 20567 | 21370 | + | Sulfotransferase                                                                                      | FIG00995709 | ff                                                                                                                                                                                                                         |
| fig 6666666.28482.peg.2227 | Contig_20 | 21367 | 22284 | + | Sulfate<br>adenylyltransferase<br>subunit 2 (EC 2.7.7.4)                                              | FIG00000728 | icw(1);Cysteine_Biosynthesis<br>icw(1);Inorganic_Sulfur_Assimilation                                                                                                                                                       |
| fig 6666666.28482.peg.2228 | Contig_20 | 22284 | 24194 | + | Sulfate<br>adenylyltransferase<br>subunit 1 (EC 2.7.7.4) /<br>Adenylylsulfate kinase<br>(EC 2.7.1.25) | FIG00133521 | idu(1);Cysteine_Biosynthesis<br>icw(1);Cysteine_Biosynthesis idu(1);O-<br>Methyl_Phosphoramidate_Capsule_<br>Modification_in_Campylobacter<br>idu(1);Inorganic_Sulfur_Assimilation<br>icw(1);Inorganic_Sulfur_Assimilation |
| fig 6666666.28482.peg.2229 | Contig_20 | 24250 | 24387 | + | hypothetical protein                                                                                  |             |                                                                                                                                                                                                                            |
| fig 6666666.28482.peg.2230 | Contig_20 | 24392 | 25519 | + | FIG00823877:<br>hypothetical protein                                                                  | FIG00823876 | ff                                                                                                                                                                                                                         |
| fig 6666666.28482.peg.2231 | Contig_20 | 25549 | 26193 | + | Lepb1170_F2_64                                                                                        | FIG00821835 | ff                                                                                                                                                                                                                         |
| fig 6666666.28482.peg.2232 | Contig_20 | 28565 | 26229 | - | FIG00821312:<br>hypothetical protein                                                                  | FIG00821311 | ff                                                                                                                                                                                                                         |
| fig 6666666.28482.peg.2233 | Contig_20 | 29697 | 28612 | - | N-succinyl-L,L-<br>diaminopimelate<br>aminotransferase<br>alternative (EC 2.6.1.17)                   | FIG00001368 | isu;Lysine_Biosynthesis_DAP_Pathwa<br>y,_GJO_scratch<br>isu;Lysine_Biosynthesis_DAP_Pathwa<br>y                                                                                                                            |
| fig 6666666.28482.peg.2234 | Contig_20 | 30032 | 29706 | - | 4Fe-4S ferredoxin, iron-<br>sulfur binding                                                            | FIG00551095 | idu(1);Inorganic_Sulfur_Assimilation                                                                                                                                                                                       |
| fig 6666666.28482.peg.2235 | Contig_20 | 30402 | 30737 | + | LOW MOLECULAR<br>WEIGHT T-CELL ANTIGEN<br>TB8.4                                                       | FIG00821016 | ff                                                                                                                                                                                                                         |
| fig 6666666.28482.peg.2236 | Contig_20 | 31571 | 30750 | - | FIG00827386:<br>hypothetical protein                                                                  | FIG00827382 | ff                                                                                                                                                                                                                         |

|                            |           |       |       |   |                                                                                                                               |             |                                                            |
|----------------------------|-----------|-------|-------|---|-------------------------------------------------------------------------------------------------------------------------------|-------------|------------------------------------------------------------|
| fig 6666666.28482.peg.2237 | Contig_20 | 34218 | 31636 | - | 7,8-didemethyl-8-hydroxy-5-deazariboflavin synthase subunit 1 / 7,8-didemethyl-8-hydroxy-5-deazariboflavin synthase subunit 2 | FIG00073737 | isu;Coenzyme_F420_synthesis<br>isu;Coenzyme_F420_synthesis |
| fig 6666666.28482.peg.2238 | Contig_20 | 34446 | 35534 | + | PE-PGRS FAMILY PROTEIN                                                                                                        |             |                                                            |
| fig 6666666.28482.peg.2239 | Contig_20 | 36005 | 35544 | - | FIG00820431: hypothetical protein                                                                                             | FIG00820429 | ff                                                         |
| fig 6666666.28482.peg.2240 | Contig_20 | 37000 | 36098 | - | N-acetyl-1-D-myo-inosityl-2-amino-2-deoxy-alpha-D-glucopyranoside deacetylase MshB                                            | FIG00023524 | isu;Glutathione_analogs:_mycothiol                         |
| fig 6666666.28482.peg.2241 | Contig_20 | 37121 | 37672 | + | Transcriptional regulator, TetR family                                                                                        | FIG00554417 | ff                                                         |
| fig 6666666.28482.peg.2242 | Contig_20 | 39951 | 37669 | - | hypothetical protein                                                                                                          | FIG00638284 | ff                                                         |
| fig 6666666.28482.peg.2243 | Contig_20 | 42110 | 40185 | - | LpqW                                                                                                                          | FIG00544125 | ff                                                         |
| fig 6666666.28482.peg.2244 | Contig_20 | 44028 | 42139 | - | GTP-binding protein TypA/BipA                                                                                                 | FIG00000268 | ff                                                         |
| fig 6666666.28482.peg.2245 | Contig_20 | 44574 | 44182 | - | Mutator mutT protein (7,8-dihydro-8-oxoguanine-triphosphatase) (EC 3.6.1. )                                                   | FIG00000892 | isu;Nudix_proteins_(nucleoside_triphosphate_hydrolases)    |
| fig 6666666.28482.peg.2246 | Contig_20 | 44775 | 45551 | + | FIG00828295: hypothetical protein                                                                                             | FIG00828293 | ff                                                         |

|                            |           |       |       |   |                                                                                             |             |                                                                                                                                                  |
|----------------------------|-----------|-------|-------|---|---------------------------------------------------------------------------------------------|-------------|--------------------------------------------------------------------------------------------------------------------------------------------------|
| fig 6666666.28482.peg.2247 | Contig_20 | 45593 | 45877 | + | Pterin-4-alpha-carbinolamine dehydratase (EC 4.2.1.96)                                      | FIG00004933 | isu;Pterin_carbinolamine_dehydratas<br>e                                                                                                         |
| fig 6666666.28482.peg.2248 | Contig_20 | 47136 | 45874 | - | probable conserved membrane protein                                                         | FIG01001774 | ff                                                                                                                                               |
| fig 6666666.28482.peg.2249 | Contig_20 | 47240 | 47911 | + | Conserved alanine and proline rich protein                                                  | FIG00821598 | ff                                                                                                                                               |
| fig 6666666.28482.peg.2250 | Contig_21 | 992   | 513   | - | FIG00821872: hypothetical protein                                                           | FIG00821871 | ff                                                                                                                                               |
| fig 6666666.28482.peg.2251 | Contig_21 | 1757  | 1008  | - | Dehydrogenases with different specificities (related to short-chain alcohol dehydrogenases) | FIG00975245 | ff                                                                                                                                               |
| fig 6666666.28482.peg.2252 | Contig_21 | 2992  | 1754  | - | alkyl sulfatase (EC 3.1.6.-)                                                                | FIG01326491 | ff                                                                                                                                               |
| fig 6666666.28482.peg.2253 | Contig_21 | 4275  | 3007  | - | FIG00826152: hypothetical protein                                                           | FIG00826150 | ff                                                                                                                                               |
| fig 6666666.28482.peg.2254 | Contig_21 | 4669  | 4283  | - | FIG00832292: hypothetical protein                                                           | FIG00828234 | ff                                                                                                                                               |
| fig 6666666.28482.peg.2255 | Contig_21 | 4793  | 5179  | + | hypothetical protein                                                                        |             |                                                                                                                                                  |
| fig 6666666.28482.peg.2256 | Contig_21 | 5416  | 6546  | + | conserved hypothetical secreted protein                                                     |             |                                                                                                                                                  |
| fig 6666666.28482.peg.2257 | Contig_21 | 6984  | 6577  | - | Arsenate reductase (EC 1.20.4.1)                                                            | FIG00000770 | idu(5);Transcription_repair_cluster<br>idu(5);CBSS-315749.4.peg.3658<br>idu(5);Arsenic_resistance<br>idu(5);Anaerobic_respiratory_reducta<br>ses |
| fig 6666666.28482.rna.33   | Contig_21 | 7218  | 7132  | - | tRNA-Ser-CGA                                                                                |             | isu;tRNAs                                                                                                                                        |

|                            |           |       |       |   |                                                                                               |             |                                                                                                                                                                                       |
|----------------------------|-----------|-------|-------|---|-----------------------------------------------------------------------------------------------|-------------|---------------------------------------------------------------------------------------------------------------------------------------------------------------------------------------|
| fig 6666666.28482.peg.2258 | Contig_21 | 7813  | 7352  | - | tRNA-specific adenosine-<br>34 deaminase (EC 3.5.4.-)                                         | FIG00000291 | isu;tRNA_processing                                                                                                                                                                   |
| fig 6666666.28482.peg.2259 | Contig_21 | 8286  | 7867  | - | FIG00994171:<br>hypothetical protein                                                          | FIG00821149 | ff                                                                                                                                                                                    |
| fig 6666666.28482.peg.2260 | Contig_21 | 8503  | 9441  | + | Arogenate<br>dehydrogenase (EC<br>1.3.1.43)                                                   | FIG00132820 | isu;Chorismate_Synthesis<br>isu;Ribosome_post-<br>transcriptional_modification_and_chr<br>omosomal_segregation_cluster<br>isu;Phenylalanine_and_Tyrosine_Bra<br>nches_from_Chorismate |
| fig 6666666.28482.peg.2261 | Contig_21 | 10003 | 9404  | - | FIG00998044:<br>hypothetical protein                                                          | FIG00822636 | ff                                                                                                                                                                                    |
| fig 6666666.28482.peg.2262 | Contig_21 | 10754 | 10008 | - | Glycine betaine ABC<br>transport system<br>permease protein                                   | FIG01954415 | icw(1);Choline_and_Betaine_Uptake_<br>and_Betaine_Biosynthesis                                                                                                                        |
| fig 6666666.28482.peg.2263 | Contig_21 | 11437 | 10751 | - | L-proline glycine betaine<br>ABC transport system<br>permease protein ProW<br>(TC 3.A.1.12.1) | FIG00005559 | icw(3);Choline_and_Betaine_Uptake_<br>and_Betaine_Biosynthesis                                                                                                                        |
| fig 6666666.28482.peg.2264 | Contig_21 | 12531 | 11440 | - | L-proline glycine betaine<br>ABC transport system<br>permease protein ProV<br>(TC 3.A.1.12.1) | FIG00008556 | isu;Choline_and_Betaine_Uptake_an<br>d_Betaine_Biosynthesis                                                                                                                           |
| fig 6666666.28482.peg.2265 | Contig_21 | 13475 | 12528 | - | L-proline glycine betaine<br>binding ABC transporter<br>protein ProX (TC<br>3.A.1.12.1)       | FIG00002823 | icw(2);Choline_and_Betaine_Uptake_<br>and_Betaine_Biosynthesis                                                                                                                        |

|                            |           |       |       |   |                                                                           |             |                                                                                                                                                                                                                                        |
|----------------------------|-----------|-------|-------|---|---------------------------------------------------------------------------|-------------|----------------------------------------------------------------------------------------------------------------------------------------------------------------------------------------------------------------------------------------|
| fig 6666666.28482.peg.2266 | Contig_21 | 13584 | 13934 | + | Cell division protein DivIC (FtsB), stabilizes FtsL against RasP cleavage | FIG00485194 | idu(10);Possible_new_toxin-antitoxin_system_including_DivIC<br>idu(10);Bacterial_Cell_Division<br>idu(10);Cell_division-ribosomal_stress_proteins_cluster<br>idu(10);Bacterial_Cytoskeleton<br>idu(10);Stationary_phase_repair_cluster |
| fig 6666666.28482.peg.2267 | Contig_21 | 15146 | 14037 | - | Acyl-CoA dehydrogenase FadE36 (EC 1.3.99.-)                               | FIG01332120 | ff                                                                                                                                                                                                                                     |
| fig 6666666.28482.peg.2268 | Contig_21 | 15780 | 15148 | - | FIG00824627:<br>hypothetical protein                                      | FIG00824624 | ff                                                                                                                                                                                                                                     |
| fig 6666666.28482.peg.2269 | Contig_21 | 15864 | 16535 | + | FIG00823067:<br>hypothetical protein                                      | FIG00823066 | ff                                                                                                                                                                                                                                     |
| fig 6666666.28482.peg.2270 | Contig_21 | 16603 | 17634 | + | probable<br>phosphotransferase                                            | FIG01454510 | ff                                                                                                                                                                                                                                     |
| fig 6666666.28482.peg.2271 | Contig_21 | 17636 | 18400 | + | Oxidoreductase, short-chain<br>dehydrogenase/reductase family             | FIG00993242 | ff                                                                                                                                                                                                                                     |
| fig 6666666.28482.peg.2272 | Contig_21 | 18421 | 19704 | + | Butyryl-CoA<br>dehydrogenase (EC 1.3.99.2)                                | FIG00009149 | idu(39);Isoleucine_degradation<br>idu(39);Lysine_fermentation<br>idu(39);Butanol_Biosynthesis<br>idu(39);Acetyl-CoA_fermentation_to_Butyrate<br>idu(39);Valine_degradation<br>idu(39);Anaerobic_respiratory_reductions                 |
| fig 6666666.28482.peg.2273 | Contig_21 | 19694 | 20305 | + | Transcriptional regulator, TetR family                                    | FIG00554417 | ff                                                                                                                                                                                                                                     |

|                            |           |       |       |   |                                                         |             |                                         |
|----------------------------|-----------|-------|-------|---|---------------------------------------------------------|-------------|-----------------------------------------|
| fig 6666666.28482.peg.2274 | Contig_21 | 20305 | 21276 | + | Quinone oxidoreductase (EC 1.6.5.5)                     | FIG00002982 | idu(7);Quinone_oxidoreductase_fam<br>ly |
| fig 6666666.28482.peg.2275 | Contig_21 | 23223 | 21349 | - | alkyl sulfatase (EC 3.1.6.-)                            | FIG01326491 | ff                                      |
| fig 6666666.28482.peg.2276 | Contig_21 | 23549 | 23869 | + | 19 kDa lipoprotein antigen precursor LpqH               | FIG01316369 | ff                                      |
| fig 6666666.28482.peg.2277 | Contig_21 | 25439 | 23922 | - | sensor histidine kinase                                 | FIG01107919 | ff                                      |
| fig 6666666.28482.peg.2278 | Contig_21 | 26121 | 25417 | - | putative two-component system response regulator        | FIG01124340 | ff                                      |
| fig 6666666.28482.peg.2279 | Contig_21 | 26424 | 26269 | - | hypothetical protein                                    |             |                                         |
| fig 6666666.28482.peg.2280 | Contig_21 | 26704 | 26471 | - | hypothetical protein                                    |             |                                         |
| fig 6666666.28482.peg.2281 | Contig_21 | 27217 | 26807 | - | FIG172205: hypothetical protein                         | FIG01517835 | ff                                      |
| fig 6666666.28482.peg.2282 | Contig_21 | 27317 | 28153 | + | FIG00821932: hypothetical protein                       | FIG00821929 | ff                                      |
| fig 6666666.28482.peg.2283 | Contig_21 | 28398 | 28267 | - | hypothetical protein                                    |             |                                         |
| fig 6666666.28482.peg.2284 | Contig_21 | 28409 | 28645 | + | protein of unknown function DUF1271                     |             |                                         |
| fig 6666666.28482.peg.2285 | Contig_21 | 29631 | 28687 | - | O-Methyltransferase involved in polyketide biosynthesis | FIG01313020 | ff                                      |
| fig 6666666.28482.peg.2286 | Contig_21 | 29735 | 30082 | + | hypothetical protein                                    |             |                                         |
| fig 6666666.28482.peg.2287 | Contig_21 | 30085 | 31119 | + | probable phosphotransferase                             | FIG01454510 | ff                                      |
| fig 6666666.28482.peg.2288 | Contig_21 | 31139 | 31639 | + | hypothetical protein                                    | FIG00638284 | ff                                      |
| fig 6666666.28482.peg.2289 | Contig_21 | 31678 | 32298 | + | hypothetical protein                                    |             |                                         |
| fig 6666666.28482.peg.2290 | Contig_21 | 32341 | 32883 | + | GCN5-related N-acetyltransferase                        |             |                                         |

|                            |           |       |       |   |                                                             |             |                                                                                                                                          |
|----------------------------|-----------|-------|-------|---|-------------------------------------------------------------|-------------|------------------------------------------------------------------------------------------------------------------------------------------|
| fig 6666666.28482.peg.2291 | Contig_22 | 11    | 1141  | + | 360aa long hypothetical malate dehydrogenase( EC:1.1.1.37 ) |             |                                                                                                                                          |
| fig 6666666.28482.peg.2292 | Contig_22 | 1179  | 2300  | + | hypothetical protein                                        |             |                                                                                                                                          |
| fig 6666666.28482.peg.2293 | Contig_22 | 3101  | 3349  | + | hypothetical protein                                        |             |                                                                                                                                          |
| fig 6666666.28482.peg.2294 | Contig_22 | 3357  | 3512  | + | hypothetical protein                                        |             |                                                                                                                                          |
| fig 6666666.28482.peg.2295 | Contig_22 | 4341  | 3589  | - | transcriptional regulator, LuxR family                      |             |                                                                                                                                          |
| fig 6666666.28482.peg.2296 | Contig_22 | 4524  | 5318  | + | 3-oxoacyl-[acyl-carrier protein] reductase (EC 1.1.1.100)   | FIG00621114 | idu(38);CBSS-246196.1.peg.364<br>idu(38);CBSS-164757.7.peg.5020<br>idu(38);Fatty_Acid_Biosynthesis_FASI<br>I                             |
| fig 6666666.28482.peg.2297 | Contig_22 | 5645  | 6085  | + | hypothetical protein                                        |             |                                                                                                                                          |
| fig 6666666.28482.peg.2298 | Contig_22 | 6757  | 6122  | - | Mobile element protein                                      | FIG01306568 | ff                                                                                                                                       |
| fig 6666666.28482.peg.2299 | Contig_22 | 9258  | 7627  | - | Cyclohexanone monooxygenase (EC 1.14.13.22)                 | FIG00975774 | ff                                                                                                                                       |
| fig 6666666.28482.peg.2300 | Contig_22 | 9977  | 9357  | - | transcriptional regulator, TetR family                      |             |                                                                                                                                          |
| fig 6666666.28482.peg.2301 | Contig_22 | 10129 | 11247 | + | Alcohol dehydrogenase (EC 1.1.1.1)                          | FIG01007502 | idu(17);Glycerolipid_and_Glycerophospholipid_Metabolism_in_Bacteria<br>idu(17);Fermentations:_Mixed_acid<br>idu(17);Butanol_Biosynthesis |
| fig 6666666.28482.peg.2302 | Contig_22 | 11416 | 11234 | - | hypothetical protein                                        |             |                                                                                                                                          |
| fig 6666666.28482.peg.2303 | Contig_22 | 11704 | 12255 | + | regulatory protein, TetR                                    |             |                                                                                                                                          |
| fig 6666666.28482.peg.2304 | Contig_22 | 13476 | 12292 | - | Esterase A                                                  | FIG01314929 | ff                                                                                                                                       |
| fig 6666666.28482.peg.2305 | Contig_22 | 13716 | 14885 | + | luciferase                                                  |             |                                                                                                                                          |

|                            |           |       |       |   |                                                            |             |                                                                                                                                    |
|----------------------------|-----------|-------|-------|---|------------------------------------------------------------|-------------|------------------------------------------------------------------------------------------------------------------------------------|
| fig 6666666.28482.peg.2306 | Contig_22 | 15785 | 15051 | - | 20-beta-hydroxysteroid dehydrogenase FabG3( EC:1.1.1.53 )  |             |                                                                                                                                    |
| fig 6666666.28482.peg.2307 | Contig_22 | 16925 | 15879 | - | Alcohol dehydrogenase (EC 1.1.1.1)                         | FIG01007502 | idu(17);Glycerolipid_and_Glycerophospholipid_Metabolism_in_Bacteria idu(17);Fermentations:_Mixed_acid idu(17);Butanol_Biosynthesis |
| fig 6666666.28482.peg.2308 | Contig_22 | 17496 | 17320 | - | hypothetical protein                                       |             |                                                                                                                                    |
| fig 6666666.28482.peg.2309 | Contig_22 | 18600 | 17551 | - | probable phosphotransferase                                | FIG01454510 | ff                                                                                                                                 |
| fig 6666666.28482.peg.2310 | Contig_22 | 19337 | 18591 | - | Oxidoreductase, short-chain dehydrogenase/reductase family | FIG00993242 | ff                                                                                                                                 |
| fig 6666666.28482.peg.2311 | Contig_22 | 20631 | 19372 | - | putative acyl-CoA dehydrogenase( EC:1.3.99.3 )             |             |                                                                                                                                    |
| fig 6666666.28482.peg.2312 | Contig_22 | 20803 | 21519 | + | Transcriptional regulator, TetR family                     | FIG00554417 | ff                                                                                                                                 |
| fig 6666666.28482.peg.2313 | Contig_22 | 21516 | 21965 | + | hypothetical protein                                       |             |                                                                                                                                    |
| fig 6666666.28482.peg.2314 | Contig_22 | 23590 | 22451 | - | acyl-CoA dehydrogenase-like                                |             |                                                                                                                                    |
| fig 6666666.28482.peg.2315 | Contig_22 | 24546 | 23587 | - | acyl-CoA dehydrogenase domain protein                      |             |                                                                                                                                    |
| fig 6666666.28482.peg.2316 | Contig_22 | 25225 | 24956 | - | hypothetical protein                                       |             |                                                                                                                                    |

|                            |           |       |       |   |                                                    |             |                                                                                                                                                            |
|----------------------------|-----------|-------|-------|---|----------------------------------------------------|-------------|------------------------------------------------------------------------------------------------------------------------------------------------------------|
| fig 6666666.28482.peg.2317 | Contig_22 | 26824 | 25265 | - | Long-chain-fatty-acid--<br>CoA ligase (EC 6.2.1.3) | FIG00018699 | idu(72);n-<br>Phenylalkanoic_acid_degradation<br>idu(72);Fatty_acid_metabolism_clust<br>er idu(72);Biotin_synthesis_cluster<br>idu(72);Biotin_biosynthesis |
| fig 6666666.28482.peg.2318 | Contig_22 | 28251 | 27001 | - | conserved hypothetical<br>protein                  |             |                                                                                                                                                            |
| fig 6666666.28482.peg.2319 | Contig_22 | 29312 | 28320 | - | FIG00823018:<br>hypothetical protein               | FIG00823016 | ff                                                                                                                                                         |
| fig 6666666.28482.peg.2320 | Contig_22 | 30253 | 29396 | - | amidohydrolase family<br>protein                   |             |                                                                                                                                                            |
| fig 6666666.28482.peg.2321 | Contig_22 | 30424 | 30675 | + | acetyl-CoA<br>acetyltransferase                    |             |                                                                                                                                                            |

|                            |           |       |       |   |                                                                                   |             |                                                                                                                                                                                                                                                                                                                                                                                                                                                                                                                                                                                                                                                 |
|----------------------------|-----------|-------|-------|---|-----------------------------------------------------------------------------------|-------------|-------------------------------------------------------------------------------------------------------------------------------------------------------------------------------------------------------------------------------------------------------------------------------------------------------------------------------------------------------------------------------------------------------------------------------------------------------------------------------------------------------------------------------------------------------------------------------------------------------------------------------------------------|
| fig 6666666.28482.peg.2322 | Contig_22 | 30633 | 30800 | + | 3-ketoacyl-CoA thiolase (EC 2.3.1.16) @ Acetyl-CoA acetyltransferase (EC 2.3.1.9) | FIG00000004 | icw(2);CBSS-246196.1.peg.364<br>idu(9);Serine-glyoxylate_cycle<br>idu(11);Serine-glyoxylate_cycle<br>icw(1);n-<br>Phenylalkanoic_acid_degradation<br>idu(9);Ethylmalonyl-<br>CoA_pathway_of_C2_assimilation,_G<br>JO<br>idu(9);Polyhydroxybutyrate_metaboli<br>sm<br>idu(11);Polyhydroxybutyrate_metabo<br>lism idu(11);Isoleucine_degradation<br>icw(1);Fatty_acid_metabolism_cluste<br>r icw(1);Biotin_synthesis_cluster<br>icw(1);Biotin_biosynthesis<br>idu(9);Lysine_fermentation<br>idu(9);Isoprenoid_Biosynthesis<br>idu(9);Butanol_Biosynthesis<br>idu(9);Acetyl-<br>CoA_fermentation_to_Butyrate<br>idu(9);Butyrate_metabolism_cluster |
| fig 6666666.28482.peg.2323 | Contig_22 | 30800 | 31537 | + | 3-oxoacyl-[acyl-carrier protein] reductase (EC 1.1.1.100)                         | FIG00621114 | icw(1);CBSS-246196.1.peg.364<br>icw(1);CBSS-164757.7.peg.5020<br>icw(1);Fatty_Acid_Biosynthesis_FASII                                                                                                                                                                                                                                                                                                                                                                                                                                                                                                                                           |
| fig 6666666.28482.peg.2324 | Contig_22 | 31547 | 32314 | + | 3-oxoacyl-[acyl-carrier protein] reductase (EC 1.1.1.100)                         | FIG00621114 | icw(1);CBSS-246196.1.peg.364<br>icw(1);CBSS-164757.7.peg.5020<br>icw(1);Fatty_Acid_Biosynthesis_FASII                                                                                                                                                                                                                                                                                                                                                                                                                                                                                                                                           |

|                            |           |       |       |   |                                                       |             |                                                                                                                                              |
|----------------------------|-----------|-------|-------|---|-------------------------------------------------------|-------------|----------------------------------------------------------------------------------------------------------------------------------------------|
| fig 6666666.28482.peg.2325 | Contig_22 | 32333 | 34138 | + | 3-methylmercaptopropionyl-CoA dehydrogenase (DmdC)    | FIG00802415 | ff                                                                                                                                           |
| fig 6666666.28482.peg.2326 | Contig_22 | 34470 | 34285 | - | hypothetical protein                                  |             |                                                                                                                                              |
| fig 6666666.28482.peg.2327 | Contig_22 | 34451 | 34765 | + | hypothetical protein                                  |             |                                                                                                                                              |
| fig 6666666.28482.peg.2328 | Contig_22 | 36107 | 35022 | - | Alpha-methylacyl-CoA racemase (EC 5.1.99.4)           | FIG01312689 | ff                                                                                                                                           |
| fig 6666666.28482.peg.2329 | Contig_22 | 36998 | 36852 | - | hypothetical protein                                  |             |                                                                                                                                              |
| fig 6666666.28482.peg.2330 | Contig_22 | 37264 | 37028 | - | hypothetical protein                                  |             |                                                                                                                                              |
| fig 6666666.28482.peg.2331 | Contig_22 | 37364 | 38230 | + | Coenzyme F420-dependent oxidoreductase                | FIG00015014 | idu(3);Anaerobic_respiratory_reductases                                                                                                      |
| fig 6666666.28482.peg.2332 | Contig_22 | 38227 | 38964 | + | hypothetical protein                                  |             |                                                                                                                                              |
| fig 6666666.28482.peg.2333 | Contig_22 | 40076 | 39459 | - | Transcriptional regulator, TetR family                | FIG00554417 | ff                                                                                                                                           |
| fig 6666666.28482.peg.2334 | Contig_22 | 41362 | 40157 | - | putative cytochrome P450 hydroxylase                  | FIG00032437 | idu(49);Nitric_oxide_synthase                                                                                                                |
| fig 6666666.28482.peg.2335 | Contig_22 | 42144 | 41587 | - | Transcriptional regulator, TetR family                | FIG00628138 | ff                                                                                                                                           |
| fig 6666666.28482.peg.2336 | Contig_22 | 42381 | 43235 | + | hypothetical protein                                  |             |                                                                                                                                              |
| fig 6666666.28482.peg.2337 | Contig_22 | 44597 | 43371 | - | L-carnitine dehydratase/bile acid-inducible protein F | FIG01318850 | ff                                                                                                                                           |
| fig 6666666.28482.peg.2338 | Contig_22 | 45474 | 44848 | - | hypothetical protein                                  |             |                                                                                                                                              |
| fig 6666666.28482.peg.2339 | Contig_22 | 47325 | 45787 | - | Long-chain-fatty-acid--CoA ligase (EC 6.2.1.3)        | FIG00018699 | idu(72);n-Phenylalkanoic_acid_degradation idu(72);Fatty_acid_metabolism_cluster idu(72);Biotin_synthesis_cluster idu(72);Biotin_biosynthesis |

|                            |           |       |       |   |                                                                                                  |             |                               |
|----------------------------|-----------|-------|-------|---|--------------------------------------------------------------------------------------------------|-------------|-------------------------------|
| fig 6666666.28482.peg.2340 | Contig_22 | 48478 | 47879 | - | hypothetical protein                                                                             |             |                               |
| fig 6666666.28482.peg.2341 | Contig_22 | 49933 | 48653 | - | FIG00821608:                                                                                     | FIG00821607 | ff                            |
|                            |           |       |       |   | hypothetical protein                                                                             |             |                               |
| fig 6666666.28482.peg.2342 | Contig_22 | 50312 | 51091 | + | short-chain<br>dehydrogenase/reductas<br>e SDR                                                   |             |                               |
| fig 6666666.28482.peg.2343 | Contig_22 | 51789 | 51478 | - | fdxD-related protein                                                                             | FIG01419919 | ff                            |
| fig 6666666.28482.peg.2344 | Contig_22 | 53084 | 51786 | - | NADH-quinone<br>oxidoreductase chain F 2<br>(EC 1.6.99.5);<br>Hypothetical FeS<br>oxidoreductase | FIG00087063 | idu(1);Respiratory_Complex_I  |
| fig 6666666.28482.peg.2345 | Contig_22 | 53473 | 53081 | - | Rieske (2Fe-2S) domain-<br>containing protein                                                    | FIG01358726 | ff                            |
| fig 6666666.28482.peg.2346 | Contig_22 | 54616 | 53543 | - | Amidohydrolase 2                                                                                 | FIG00821472 | ff                            |
| fig 6666666.28482.peg.2347 | Contig_22 | 55817 | 54711 | - | FIG00821228:                                                                                     | FIG01354128 | ff                            |
|                            |           |       |       |   | hypothetical protein                                                                             |             |                               |
| fig 6666666.28482.peg.2348 | Contig_22 | 56165 | 57535 | + | putative cytochrome<br>P450 hydroxylase                                                          | FIG00032437 | idu(49);Nitric_oxide_synthase |
| fig 6666666.28482.peg.2349 | Contig_22 | 58874 | 57909 | - | Rieske (2Fe-2S) domain<br>protein                                                                |             |                               |
| fig 6666666.28482.peg.2350 | Contig_22 | 59521 | 59955 | + | XoxI                                                                                             |             |                               |
| fig 6666666.28482.peg.2351 | Contig_22 | 61379 | 60126 | - | FIG00822014:                                                                                     | FIG01547276 | ff                            |
|                            |           |       |       |   | hypothetical protein                                                                             |             |                               |
| fig 6666666.28482.peg.2352 | Contig_22 | 62527 | 61376 | - | Acyl-CoA dehydrogenase,<br>short-chain specific (EC<br>1.3.99.2)                                 | FIG00009849 | idu(2);Isoleucine_degradation |
| fig 6666666.28482.peg.2353 | Contig_22 | 63707 | 62814 | - | hypothetical protein                                                                             |             |                               |
| fig 6666666.28482.peg.2354 | Contig_22 | 63812 | 64303 | + | hypothetical protein                                                                             | FIG00638284 | ff                            |

|                            |           |       |       |   |                                                            |             |                                                                                                                                                                                                                                                                                                                                                   |
|----------------------------|-----------|-------|-------|---|------------------------------------------------------------|-------------|---------------------------------------------------------------------------------------------------------------------------------------------------------------------------------------------------------------------------------------------------------------------------------------------------------------------------------------------------|
| fig 6666666.28482.peg.2355 | Contig_22 | 64325 | 65752 | + | Succinate-semialdehyde dehydrogenase [NADP+] (EC 1.2.1.16) | FIG01958943 | ff                                                                                                                                                                                                                                                                                                                                                |
| fig 6666666.28482.peg.2356 | Contig_22 | 65749 | 66186 | + | hypothetical protein                                       |             |                                                                                                                                                                                                                                                                                                                                                   |
| fig 6666666.28482.peg.2357 | Contig_22 | 67200 | 66499 | - | Short-chain dehydrogenase/reductase SDR                    |             | idu(13);CBSS-164757.7.peg.5020<br>idu(13);Transcription_repair_cluster                                                                                                                                                                                                                                                                            |
| fig 6666666.28482.peg.2358 | Contig_22 | 68623 | 67421 | - | putative cytochrome P450 hydroxylase                       | FIG00032437 | idu(49);Nitric_oxide_synthase                                                                                                                                                                                                                                                                                                                     |
| fig 6666666.28482.peg.2359 | Contig_22 | 68727 | 69539 | + | Enoyl-CoA hydratase (EC 4.2.1.17)                          | FIG00033206 | idu(51);n-Phenylalkanoic_acid_degradation<br>idu(51);Polyhydroxybutyrate_metabolism<br>idu(51);Isoleucine_degradation<br>idu(51);Fatty_acid_metabolism_cluster<br>idu(51);Lysine_fermentation<br>idu(51);Butanol_Biosynthesis<br>idu(51);Acetyl-CoA_fermentation_to_Butyrate<br>idu(51);Valine_degradation<br>idu(51);Butyrate_metabolism_cluster |
| fig 6666666.28482.peg.2360 | Contig_22 | 70242 | 71624 | + | aldehyde dehydrogenase                                     |             |                                                                                                                                                                                                                                                                                                                                                   |
| fig 6666666.28482.peg.2361 | Contig_22 | 71889 | 72320 | + | hypothetical protein                                       |             |                                                                                                                                                                                                                                                                                                                                                   |
| fig 6666666.28482.peg.2362 | Contig_22 | 73695 | 72412 | - | hypothetical protein                                       |             |                                                                                                                                                                                                                                                                                                                                                   |
| fig 6666666.28482.peg.2363 | Contig_22 | 73849 | 73712 | - | hypothetical protein                                       |             |                                                                                                                                                                                                                                                                                                                                                   |

|                            |           |       |       |   |                                                                                              |             |                                                                                                                                                                                               |
|----------------------------|-----------|-------|-------|---|----------------------------------------------------------------------------------------------|-------------|-----------------------------------------------------------------------------------------------------------------------------------------------------------------------------------------------|
| fig 6666666.28482.peg.2364 | Contig_22 | 75478 | 73973 | - | Long-chain-fatty-acid--<br>CoA ligase (EC 6.2.1.3)                                           | FIG00018699 | idu(72);n-<br>Phenylalkanoic_acid_degradation<br>idu(72);Fatty_acid_metabolism_clust<br>er idu(72);Biotin_synthesis_cluster<br>idu(72);Biotin_biosynthesis                                    |
| fig 6666666.28482.peg.2365 | Contig_22 | 76230 | 75475 | - | hypothetical protein                                                                         |             |                                                                                                                                                                                               |
| fig 6666666.28482.peg.2366 | Contig_22 | 77696 | 76230 | - | Aldehyde dehydrogenase<br>(EC 1.2.1.3)                                                       | FIG01292786 | idu(16);Pyruvate_metabolism_II:_ace<br>tyl-<br>CoA,_acetogenesis_from_pyruvate<br>idu(16);Glycerolipid_and_Glyceroph<br>ospholipid_Metabolism_in_Bacteria<br>idu(16);Methylglyoxal_Metabolism |
| fig 6666666.28482.peg.2367 | Contig_22 | 78408 | 77800 | - | Transcriptional regulator,<br>TetR family                                                    |             |                                                                                                                                                                                               |
| fig 6666666.28482.peg.2368 | Contig_22 | 79243 | 78650 | - | Transcriptional regulator,<br>TetR family                                                    |             |                                                                                                                                                                                               |
| fig 6666666.28482.peg.2369 | Contig_22 | 79576 | 81594 | + | Acetoin dehydrogenase<br>E1 component alpha-<br>subunit (EC 1.2.4.-)                         | FIG00138523 | idu(2);Acetoin,_butanediol_metaboli<br>sm idu(2);Dehydrogenase_complexes                                                                                                                      |
| fig 6666666.28482.peg.2370 | Contig_22 | 81591 | 81818 | + | 2-oxoglutarate<br>dehydrogenase, E2<br>component,<br>dihydrolipoamide<br>succinyltransferase |             |                                                                                                                                                                                               |
| fig 6666666.28482.peg.2371 | Contig_22 | 81815 | 82669 | + | Enoyl-CoA<br>hydratase/isomerase                                                             |             |                                                                                                                                                                                               |

|                            |           |       |       |   |                                                                                                            |             |                                                                                                         |
|----------------------------|-----------|-------|-------|---|------------------------------------------------------------------------------------------------------------|-------------|---------------------------------------------------------------------------------------------------------|
| fig 6666666.28482.peg.2372 | Contig_22 | 82633 | 83646 | + | Enoyl-[acyl-carrier-protein] reductase [FMN] (EC 1.3.1.9)                                                  | FIG00007641 | idu(1);Fatty_Acid_Biosynthesis_FASII                                                                    |
| fig 6666666.28482.peg.2373 | Contig_22 | 83751 | 84839 | + | Formaldehyde dehydrogenase MscR, NAD/mycothiol-dependent (EC 1.2.1.66) / S-nitrosomycothiol reductase MscR | FIG00013253 | idu(1);Glutathione_analogs:_mycothiol<br>icw(2);Glutathione_analogs:_mycothiol                          |
| fig 6666666.28482.peg.2374 | Contig_22 | 84839 | 85117 | + | Putative hydrolase in cluster with formaldehyde/S-nitrosomycothiol reductase MscR                          | FIG00146043 | icw(2);Glutathione_analogs:_mycothiol                                                                   |
| fig 6666666.28482.peg.2375 | Contig_22 | 85166 | 85462 | + | Putative hydrolase in cluster with formaldehyde/S-nitrosomycothiol reductase MscR                          | FIG00146043 | icw(2);Glutathione_analogs:_mycothiol                                                                   |
| fig 6666666.28482.peg.2376 | Contig_22 | 85466 | 85603 | + | hypothetical protein                                                                                       |             |                                                                                                         |
| fig 6666666.28482.peg.2377 | Contig_22 | 85698 | 87191 | + | Methylmalonate-semialdehyde dehydrogenase (EC 1.2.1.27)                                                    | FIG00137372 | idu(1);Valine_degradation                                                                               |
| fig 6666666.28482.peg.2378 | Contig_22 | 87338 | 87844 | + | hypothetical protein                                                                                       |             |                                                                                                         |
| fig 6666666.28482.peg.2379 | Contig_22 | 87919 | 88635 | + | 3-oxoacyl-[acyl-carrier protein] reductase (EC 1.1.1.100)                                                  | FIG00621114 | idu(38);CBSS-246196.1.peg.364<br>idu(38);CBSS-164757.7.peg.5020<br>idu(38);Fatty_Acid_Biosynthesis_FASI |

|                            |           |        |        |   |                                                              |             |                                                                                                                                                                                                                                |
|----------------------------|-----------|--------|--------|---|--------------------------------------------------------------|-------------|--------------------------------------------------------------------------------------------------------------------------------------------------------------------------------------------------------------------------------|
| fig 6666666.28482.peg.2380 | Contig_22 | 90381  | 88753  | - | Long-chain-fatty-acid--<br>CoA ligase (EC 6.2.1.3)           | FIG00018699 | idu(72);n-<br>Phenylalkanoic_acid_degradation<br>idu(72);Fatty_acid_metabolism_clust<br>er idu(72);Biotin_synthesis_cluster<br>idu(72);Biotin_biosynthesis                                                                     |
| fig 6666666.28482.peg.2381 | Contig_22 | 91730  | 90882  | - | hypothetical protein                                         |             |                                                                                                                                                                                                                                |
| fig 6666666.28482.peg.2382 | Contig_22 | 91860  | 91723  | - | hypothetical protein                                         |             |                                                                                                                                                                                                                                |
| fig 6666666.28482.peg.2383 | Contig_22 | 93157  | 91916  | - | putative cytochrome<br>P450 hydroxylase                      | FIG00032437 | idu(49);Nitric_oxide_synthase                                                                                                                                                                                                  |
| fig 6666666.28482.peg.2384 | Contig_22 | 94329  | 93154  | - | Butyryl-CoA<br>dehydrogenase (EC<br>1.3.99.2)                | FIG00009149 | idu(39);Isoleucine_degradation<br>idu(39);Lysine_fermentation<br>idu(39);Butanol_Biosynthesis<br>idu(39);Acetyl-<br>CoA_fermentation_to_Butyrate<br>idu(39);Valine_degradation<br>idu(39);Anaerobic_respiratory_reduc<br>tases |
| fig 6666666.28482.peg.2385 | Contig_22 | 95351  | 94326  | - | hypothetical protein                                         | FIG00638284 | ff                                                                                                                                                                                                                             |
| fig 6666666.28482.peg.2386 | Contig_22 | 96456  | 95353  | - | hypothetical protein                                         | FIG00638284 | ff                                                                                                                                                                                                                             |
| fig 6666666.28482.peg.2387 | Contig_22 | 97730  | 96459  | - | hypothetical protein                                         | FIG00638284 | ff                                                                                                                                                                                                                             |
| fig 6666666.28482.peg.2388 | Contig_22 | 98447  | 97848  | - | Transcriptional regulator,<br>TetR family                    |             |                                                                                                                                                                                                                                |
| fig 6666666.28482.peg.2389 | Contig_22 | 99104  | 98655  | - | hypothetical protein                                         |             |                                                                                                                                                                                                                                |
| fig 6666666.28482.peg.2390 | Contig_22 | 100327 | 99101  | - | L-carnitine<br>dehydratase/bile acid-<br>inducible protein F | FIG01318850 | ff                                                                                                                                                                                                                             |
| fig 6666666.28482.peg.2391 | Contig_22 | 101956 | 100358 | - | Choline dehydrogenase<br>(EC 1.1.99.1)                       | FIG00057416 | idu(4);Choline_uptake_and_conversi<br>on_to_betaine_clusters<br>idu(4);Choline_and_Betaine_Uptake_<br>and_Betaine_Biosynthesis                                                                                                 |
| fig 6666666.28482.peg.2392 | Contig_22 | 102509 | 102354 | - | hypothetical protein                                         |             |                                                                                                                                                                                                                                |

|                            |           |        |        |   |                                                                   |                                                                                 |
|----------------------------|-----------|--------|--------|---|-------------------------------------------------------------------|---------------------------------------------------------------------------------|
| fig 6666666.28482.peg.2393 | Contig_22 | 102541 | 102822 | + | hypothetical protein                                              |                                                                                 |
| fig 6666666.28482.peg.2394 | Contig_22 | 103160 | 103924 | + | hypothetical protein                                              |                                                                                 |
| fig 6666666.28482.peg.2395 | Contig_22 | 104052 | 103921 | - | hypothetical protein                                              |                                                                                 |
| fig 6666666.28482.peg.2396 | Contig_22 | 104157 | 104600 | + | Protein of unknown function DUF1486                               |                                                                                 |
| fig 6666666.28482.peg.2397 | Contig_22 | 104815 | 104687 | - | hypothetical protein                                              |                                                                                 |
| fig 6666666.28482.peg.2398 | Contig_22 | 104951 | 105118 | + | hypothetical protein                                              |                                                                                 |
| fig 6666666.28482.peg.2399 | Contig_22 | 105942 | 105142 | - | TesB-like acyl-CoA thioesterase 4                                 | idu(2);Acyl-CoA_thioesterase_II                                                 |
| fig 6666666.28482.peg.2400 | Contig_22 | 106985 | 106479 | - | Transcriptional regulator, TetR family                            |                                                                                 |
| fig 6666666.28482.peg.2401 | Contig_22 | 108343 | 107339 | - | PROBABLE CHOLESTEROL DEHYDROGENASE                                | FIG00820427 ff                                                                  |
| fig 6666666.28482.peg.2402 | Contig_22 | 109228 | 108434 | - | hypothetical protein                                              |                                                                                 |
| fig 6666666.28482.peg.2403 | Contig_22 | 110587 | 109928 | - | hypothetical protein                                              |                                                                                 |
| fig 6666666.28482.peg.2404 | Contig_22 | 111107 | 111781 | + | hypothetical protein                                              |                                                                                 |
| fig 6666666.28482.peg.2405 | Contig_22 | 112030 | 112821 | + | hypothetical protein                                              |                                                                                 |
| fig 6666666.28482.peg.2406 | Contig_22 | 113683 | 112847 | - | Transcriptional regulator, lclR family                            | idu(12);Homogentisate_pathway_of_aromatic_compound_degradation                  |
| fig 6666666.28482.peg.2407 | Contig_22 | 113853 | 115094 | + | hypothetical protein                                              | FIG00638284 ff                                                                  |
| fig 6666666.28482.peg.2408 | Contig_22 | 116266 | 115997 | - | RelB/StbD replicon stabilization protein (antitoxin to RelE/StbE) | FIG01304488 ff                                                                  |
| fig 6666666.28482.peg.2409 | Contig_22 | 117767 | 116973 | - | FIG00820444: hypothetical protein                                 | FIG00820442 ff                                                                  |
| fig 6666666.28482.peg.2410 | Contig_22 | 118501 | 117764 | - | FIG00822942: hypothetical protein                                 | FIG00822941 ff                                                                  |
| fig 6666666.28482.peg.2411 | Contig_22 | 119779 | 118529 | - | MCE-family protein Mce1F                                          | FIG00821171 idu(7);Mycobacterium_virulence_operon_MCE_involved_in_cell_invasion |

|                            |           |        |        |   |                                                            |             |                                                                     |
|----------------------------|-----------|--------|--------|---|------------------------------------------------------------|-------------|---------------------------------------------------------------------|
| fig 6666666.28482.peg.2412 | Contig_22 | 120984 | 119776 | - | MCE-family lipoprotein LprK (MCE-family lipoprotein Mce1e) | FIG00819998 | icw(3);Mycobacterium_virulence_operon_MCE_involved_in_cell_invasion |
| fig 6666666.28482.peg.2413 | Contig_22 | 122102 | 120981 | - | MCE-family protein Mce1D                                   | FIG00820669 | icw(1);Mycobacterium_virulence_operon_MCE_involved_in_cell_invasion |
| fig 6666666.28482.peg.2414 | Contig_22 | 123154 | 122099 | - | MCE-family protein Mce1C                                   | FIG00821293 | icw(7);Mycobacterium_virulence_operon_MCE_involved_in_cell_invasion |
| fig 6666666.28482.peg.2415 | Contig_22 | 124208 | 123147 | - | MCE-family protein Mce1B                                   | FIG00763551 | icw(6);Mycobacterium_virulence_operon_MCE_involved_in_cell_invasion |
| fig 6666666.28482.peg.2416 | Contig_22 | 125790 | 124210 | - | MCE-family protein Mce1A                                   | FIG00820494 | icw(2);Mycobacterium_virulence_operon_MCE_involved_in_cell_invasion |
| fig 6666666.28482.peg.2417 | Contig_22 | 126656 | 125793 | - | Conserved hypothetical integral membrane protein YrbE1B    | FIG00691621 | icw(3);Mycobacterium_virulence_operon_MCE_involved_in_cell_invasion |
| fig 6666666.28482.peg.2418 | Contig_22 | 127497 | 126658 | - | Conserved hypothetical integral membrane protein YrbE1A    | FIG00690583 | idu(7);Mycobacterium_virulence_operon_MCE_involved_in_cell_invasion |
| fig 6666666.28482.peg.2419 | Contig_22 | 127801 | 128406 | + | Transcriptional regulator, TetR family                     | FIG00554417 | ff                                                                  |
| fig 6666666.28482.peg.2420 | Contig_22 | 129979 | 130164 | + | hypothetical protein                                       |             |                                                                     |
| fig 6666666.28482.peg.2421 | Contig_22 | 130869 | 130985 | + | hypothetical protein                                       |             |                                                                     |
| fig 6666666.28482.peg.2422 | Contig_22 | 132075 | 132797 | + | site-specific recombinase, phage integrase family protein  |             |                                                                     |
| fig 6666666.28482.peg.2423 | Contig_22 | 135482 | 132891 | - | hypothetical protein                                       | FIG00638284 | ff                                                                  |

|                            |           |        |        |   |                                                                 |             |                               |
|----------------------------|-----------|--------|--------|---|-----------------------------------------------------------------|-------------|-------------------------------|
| fig 6666666.28482.peg.2424 | Contig_22 | 135725 | 135594 | - | hypothetical protein                                            |             |                               |
| fig 6666666.28482.peg.2425 | Contig_23 | 1077   | 214    | - | FIG00822559:                                                    | FIG00822557 | ff                            |
|                            |           |        |        |   | hypothetical protein                                            |             |                               |
| fig 6666666.28482.peg.2426 | Contig_23 | 4296   | 1171   | - | Isoleucyl-tRNA                                                  | FIG00000085 | isu;tRNA_aminoacylation,_Ile  |
|                            |           |        |        |   | synthetase (EC 6.1.1.5)                                         |             |                               |
| fig 6666666.28482.peg.2427 | Contig_23 | 4815   | 4585   | - | Putative uncharacterized protein BCG_1587                       |             |                               |
| fig 6666666.28482.peg.2428 | Contig_23 | 6008   | 5364   | - | Transcriptional regulator, TetR family                          | FIG00554417 | ff                            |
| fig 6666666.28482.peg.2429 | Contig_23 | 7129   | 6005   | - | 2-nitropropane dioxygenase (EC 1.13.11.32)                      | FIG01304356 | idu(5);CBSS-164757.7.peg.5020 |
| fig 6666666.28482.peg.2430 | Contig_23 | 7744   | 7169   | - | Carboxymuconolactone decarboxylase                              | FIG00825342 | ff                            |
| fig 6666666.28482.peg.2431 | Contig_23 | 7941   | 7828   | - | hypothetical protein                                            |             |                               |
| fig 6666666.28482.peg.2432 | Contig_23 | 8747   | 15013  | + | Polyketide synthase                                             | FIG00823157 | ff                            |
| fig 6666666.28482.peg.2433 | Contig_23 | 15111  | 16517  | + | POSSIBLE CONSERVED POLYKETIDE SYNTHASE ASSOCIATED PROTEIN PAPA2 | FIG01352858 | ff                            |
| fig 6666666.28482.peg.2434 | Contig_23 | 16567  | 17817  | + | Uncharacterized protein Rv1526c/MT1577                          |             | ff                            |
| fig 6666666.28482.peg.2435 | Contig_23 | 18616  | 17831  | - | POSSIBLE RHAMNOSYL TRANSFERASE WBBL2                            | FIG01317637 | ff                            |
| fig 6666666.28482.peg.2436 | Contig_23 | 19911  | 18664  | - | Uncharacterized glycosyltransferase Rv1524/MT1575 (EC 2.-.-.-)  |             | ff                            |
| fig 6666666.28482.peg.2437 | Contig_23 | 20713  | 19928  | - | Probable methyltransferase (EC 2.1.1.-)                         |             |                               |

|                            |           |       |       |   |                                                |             |                                                                                                                                              |
|----------------------------|-----------|-------|-------|---|------------------------------------------------|-------------|----------------------------------------------------------------------------------------------------------------------------------------------|
| fig 6666666.28482.peg.2438 | Contig_23 | 20883 | 24611 | + | Transmembrane transport protein MmpL12         | FIG01343169 | ff                                                                                                                                           |
| fig 6666666.28482.peg.2439 | Contig_23 | 26462 | 24708 | - | Long-chain-fatty-acid--CoA ligase (EC 6.2.1.3) | FIG00018699 | idu(72);n-Phenylalkanoic_acid_degradation idu(72);Fatty_acid_metabolism_cluster idu(72);Biotin_synthesis_cluster idu(72);Biotin_biosynthesis |
| fig 6666666.28482.peg.2440 | Contig_23 | 26593 | 27939 | + | hypothetical protein                           |             |                                                                                                                                              |
| fig 6666666.28482.peg.2441 | Contig_23 | 28842 | 27892 | - | Glycosyltransferase PglI (EC 2.4.1.-)          | FIG00015097 | isu;N-linked_Glycosylation_in_Bacteria                                                                                                       |
| fig 6666666.28482.peg.2442 | Contig_23 | 29656 | 28892 | - | hypothetical protein                           | FIG00638284 | ff                                                                                                                                           |
| fig 6666666.28482.peg.2443 | Contig_23 | 29999 | 30964 | + | GDP-mannose 4,6 dehydratase (EC 4.2.1.47)      | FIG01318417 | ff                                                                                                                                           |
| fig 6666666.28482.peg.2444 | Contig_23 | 30961 | 32058 | + | mannosyltransferase                            |             |                                                                                                                                              |
| fig 6666666.28482.peg.2445 | Contig_23 | 32846 | 32055 | - | hypothetical protein                           |             |                                                                                                                                              |
| fig 6666666.28482.peg.2446 | Contig_23 | 33113 | 34129 | + | "GDP-mannose 4,6-dehydratase (EC 4.2.1.47)"    | FIG01463199 | ff                                                                                                                                           |
| fig 6666666.28482.peg.2447 | Contig_23 | 34987 | 35106 | + | hypothetical protein                           |             |                                                                                                                                              |
| fig 6666666.28482.peg.2448 | Contig_23 | 36072 | 35128 | - | dTDP-glucose 4,6-dehydratase (EC 4.2.1.46)     | FIG00030688 | idu(4);dTDP-rhamnose_synthesis idu(4);Rhamnose_containing_glycans                                                                            |
| fig 6666666.28482.peg.2449 | Contig_23 | 37405 | 36089 | - | UDP-glucose dehydrogenase (EC 1.1.1.22)        | FIG00000532 | isu;Lipid_A-Ara4N_pathway_(Polymyxin_resistance_)                                                                                            |
| fig 6666666.28482.peg.2450 | Contig_23 | 37568 | 37771 | + | hypothetical protein                           |             |                                                                                                                                              |
| fig 6666666.28482.peg.2451 | Contig_23 | 38259 | 38795 | + | hypothetical protein                           | FIG00638284 | ff                                                                                                                                           |

|                            |           |       |       |   |                                                                            |             |                                                                                                                                                                                               |
|----------------------------|-----------|-------|-------|---|----------------------------------------------------------------------------|-------------|-----------------------------------------------------------------------------------------------------------------------------------------------------------------------------------------------|
| fig 6666666.28482.peg.2452 | Contig_23 | 38917 | 39840 | + | GDP-fucose synthetase                                                      | FIG01321732 | ff                                                                                                                                                                                            |
| fig 6666666.28482.peg.2453 | Contig_23 | 40121 | 40894 | + | PGL/p-HBAD biosynthesis glycosyltransferase                                | FIG01358340 | ff                                                                                                                                                                                            |
| fig 6666666.28482.peg.2454 | Contig_23 | 42767 | 41148 | - | hypothetical protein                                                       | FIG00638284 | ff                                                                                                                                                                                            |
| fig 6666666.28482.peg.2455 | Contig_23 | 44298 | 42796 | - | Methyltransferase type 11                                                  |             |                                                                                                                                                                                               |
| fig 6666666.28482.peg.2456 | Contig_23 | 45348 | 44329 | - | UDP-glucose 4-epimerase (EC 5.1.3.2)                                       | FIG00022300 | idu(4);Rhamnose_containing_glycans idu(4);Lactose_and_Galactose_Uptake_and_Utilization idu(4);N-linked_Glycosylation_in_Bacteria idu(4);Lacto-N-Biose_I_and_Galacto-N-Biose_Metabolic_Pathway |
| fig 6666666.28482.peg.2457 | Contig_23 | 46604 | 45345 | - | UDP-glucose 6-dehydrogenase, UdgL                                          | FIG00830476 | ff                                                                                                                                                                                            |
| fig 6666666.28482.peg.2458 | Contig_23 | 47086 | 47430 | + | FIG00831004: hypothetical protein                                          | FIG00831003 | ff                                                                                                                                                                                            |
| fig 6666666.28482.peg.2459 | Contig_23 | 48961 | 47516 | - | Probable transmembrane protein                                             |             |                                                                                                                                                                                               |
| fig 6666666.28482.peg.2460 | Contig_23 | 49395 | 49622 | + | Dodecin (COG3360) Flavin-binding                                           |             |                                                                                                                                                                                               |
| fig 6666666.28482.peg.2461 | Contig_23 | 50836 | 49619 | - | Esterase LipL                                                              | FIG01388262 | ff                                                                                                                                                                                            |
| fig 6666666.28482.peg.2462 | Contig_23 | 50813 | 50989 | + | hypothetical protein                                                       |             |                                                                                                                                                                                               |
| fig 6666666.28482.peg.2463 | Contig_23 | 51944 | 50970 | - | putative periplasmic protein kinase ArgK and related GTPases of G3E family | FIG00007966 | idu(1);G3E_family_of_P-loop_GTPases_(metallocenter_biosynthesis)                                                                                                                              |
| fig 6666666.28482.peg.2464 | Contig_23 | 53273 | 51972 | - | Possible membrane protein                                                  | FIG01121868 | ff                                                                                                                                                                                            |

|                            |           |       |       |   |                                                                              |             |                                                                                                            |
|----------------------------|-----------|-------|-------|---|------------------------------------------------------------------------------|-------------|------------------------------------------------------------------------------------------------------------|
| fig 6666666.28482.peg.2465 | Contig_23 | 55728 | 53512 | - | Methylmalonyl-CoA mutase (EC 5.4.99.2)                                       | FIG00000927 | icw(1);Serine-glyoxylate_cycle<br>icw(2);G3E_family_of_P-<br>loop_GTPases_(metallocenter_biosyn<br>thesis) |
| fig 6666666.28482.peg.2466 | Contig_23 | 57616 | 55733 | - | Methylmalonyl-CoA mutase, small subunit (EC 5.4.99.2)                        |             | isu;Serine-glyoxylate_cycle<br>isu;G3E_family_of_P-<br>loop_GTPases_(metallocenter_biosyn<br>thesis)       |
| fig 6666666.28482.peg.2467 | Contig_23 | 57901 | 58557 | + | DedA family protein<br>paralog                                               | FIG00027618 | isu;DedA_family_of_inner_membran<br>e_proteins                                                             |
| fig 6666666.28482.peg.2468 | Contig_23 | 58746 | 59024 | + | hypothetical protein                                                         |             |                                                                                                            |
| fig 6666666.28482.peg.2469 | Contig_23 | 59047 | 59298 | + | PROBABLE PROLINE AND<br>GLYCINE RICH<br>TRANSMEMBRANE<br>PROTEIN             |             |                                                                                                            |
| fig 6666666.28482.peg.2470 | Contig_23 | 60834 | 59368 | - | Signal transduction<br>histidine kinase                                      | FIG01225284 | ff                                                                                                         |
| fig 6666666.28482.peg.2471 | Contig_23 | 61118 | 60831 | - | Two component system<br>response regulator                                   | FIG01309596 | ff                                                                                                         |
| fig 6666666.28482.peg.2472 | Contig_23 | 61489 | 61106 | - | Two component system<br>response regulator                                   | FIG01309596 | ff                                                                                                         |
| fig 6666666.28482.peg.2473 | Contig_23 | 63003 | 61642 | - | L-Proline/Glycine betaine<br>transporter ProP                                | FIG00061305 | isu;Proline,_4-<br>hydroxyproline_uptake_and_utilizati<br>on                                               |
| fig 6666666.28482.peg.2474 | Contig_23 | 63455 | 63099 | - | FIG00822897:<br>hypothetical protein                                         | FIG00822896 | ff                                                                                                         |
| fig 6666666.28482.peg.2475 | Contig_23 | 64608 | 63466 | - | Putative<br>stomatin/prohibitin-<br>family membrane<br>protease subunit YbbK | FIG00000531 | ff                                                                                                         |

|                            |           |       |       |   |                                                                                           |             |                                                                                                              |
|----------------------------|-----------|-------|-------|---|-------------------------------------------------------------------------------------------|-------------|--------------------------------------------------------------------------------------------------------------|
| fig 6666666.28482.peg.2476 | Contig_23 | 65071 | 64637 | - | Putative activity<br>regulator of membrane<br>protease YbbK                               | FIG00019415 | ff                                                                                                           |
| fig 6666666.28482.peg.2477 | Contig_23 | 65129 | 66049 | + | FIG00821059:<br>hypothetical protein                                                      | FIG00821055 | ff                                                                                                           |
| fig 6666666.28482.peg.2478 | Contig_23 | 67185 | 66181 | - | Ferrochelatase,<br>protoheme ferro-lyase<br>(EC 4.99.1.1)                                 | FIG00000345 | isu;Heme_and_Siroheme_Biosynthesi<br>s                                                                       |
| fig 6666666.28482.peg.2479 | Contig_23 | 68001 | 67192 | - | Enoyl-[acyl-carrier-<br>protein] reductase<br>[NADH] (EC 1.3.1.9)                         | FIG00000524 | icw(1);Fatty_Acid_Biosynthesis_FASII                                                                         |
| fig 6666666.28482.peg.2480 | Contig_23 | 68722 | 68036 | - | 3-oxoacyl-[acyl-carrier<br>protein] reductase (EC<br>1.1.1.100)                           | FIG00621114 | idu(38);CBSS-246196.1.peg.364<br>idu(38);CBSS-164757.7.peg.5020<br>idu(38);Fatty_Acid_Biosynthesis_FASI<br>I |
| fig 6666666.28482.peg.2481 | Contig_23 | 69926 | 68919 | - | Possible membrane<br>protein                                                              | FIG01121868 | ff                                                                                                           |
| fig 6666666.28482.peg.2482 | Contig_23 | 70873 | 69923 | - | Possible membrane<br>protein                                                              | FIG01121868 | ff                                                                                                           |
| fig 6666666.28482.peg.2483 | Contig_23 | 72000 | 70870 | - | COG0714: MoxR-like<br>ATPases                                                             | FIG00821266 | ff                                                                                                           |
| fig 6666666.28482.peg.2484 | Contig_23 | 72856 | 72122 | - | Invasion protein                                                                          | FIG01316782 | ff                                                                                                           |
| fig 6666666.28482.peg.2485 | Contig_23 | 74245 | 72881 | - | NLP/P60 family protein                                                                    | FIG00012683 | ff                                                                                                           |
| fig 6666666.28482.peg.2486 | Contig_23 | 75104 | 74565 | - | Possible membrane<br>protein                                                              | FIG01121868 | ff                                                                                                           |
| fig 6666666.28482.peg.2487 | Contig_23 | 75270 | 78068 | + | Aconitate hydratase (EC<br>4.2.1.3) @ 2-<br>methylisocitrate<br>dehydratase (EC 4.2.1.99) | FIG00138200 | isu;Serine-glyoxylate_cycle<br>isu;TCA_Cycle isu;Glyoxylate_bypass<br>isu;Methylcitrate_cycle                |

|                            |           |       |       |   |                                                                 |             |                                                                                                                                                                                                                                                                                                                                                   |
|----------------------------|-----------|-------|-------|---|-----------------------------------------------------------------|-------------|---------------------------------------------------------------------------------------------------------------------------------------------------------------------------------------------------------------------------------------------------------------------------------------------------------------------------------------------------|
| fig 6666666.28482.peg.2488 | Contig_23 | 78081 | 78662 | + | Transcriptional regulator, TetR family                          | FIG00554417 | ff                                                                                                                                                                                                                                                                                                                                                |
| fig 6666666.28482.peg.2489 | Contig_23 | 78907 | 78701 | - | POSSIBLE TRANSCRIPTIONAL REGULATORY PROTEIN                     | FIG01346806 | ff                                                                                                                                                                                                                                                                                                                                                |
| fig 6666666.28482.peg.2490 | Contig_23 | 80628 | 79000 | - | ABC transporter ATP-binding protein                             | FIG01956052 | ff                                                                                                                                                                                                                                                                                                                                                |
| fig 6666666.28482.peg.2491 | Contig_23 | 81381 | 80650 | - | Enoyl-CoA hydratase (EC 4.2.1.17)                               | FIG00033206 | idu(51);n-Phenylalkanoic_acid_degradation<br>idu(51);Polyhydroxybutyrate_metabolism<br>idu(51);Isoleucine_degradation<br>idu(51);Fatty_acid_metabolism_cluster<br>idu(51);Lysine_fermentation<br>idu(51);Butanol_Biosynthesis<br>idu(51);Acetyl-CoA_fermentation_to_Butyrate<br>idu(51);Valine_degradation<br>idu(51);Butyrate_metabolism_cluster |
| fig 6666666.28482.peg.2492 | Contig_23 | 82197 | 81484 | - | hypothetical protein                                            | FIG00638284 | ff                                                                                                                                                                                                                                                                                                                                                |
| fig 6666666.28482.peg.2493 | Contig_23 | 82538 | 83980 | + | POSSIBLE CONSERVED POLYKETIDE SYNTHASE ASSOCIATED PROTEIN PAPA2 | FIG01352858 | ff                                                                                                                                                                                                                                                                                                                                                |
| fig 6666666.28482.peg.2494 | Contig_23 | 84336 | 83977 | - | Thioredoxin TrxB1                                               | FIG01340204 | ff                                                                                                                                                                                                                                                                                                                                                |
| fig 6666666.28482.peg.2495 | Contig_23 | 84544 | 85623 | + | hypothetical protein                                            | FIG00638284 | ff                                                                                                                                                                                                                                                                                                                                                |

|                            |           |       |       |   |                                                                              |             |                                                                                                                     |
|----------------------------|-----------|-------|-------|---|------------------------------------------------------------------------------|-------------|---------------------------------------------------------------------------------------------------------------------|
| fig 6666666.28482.peg.2496 | Contig_23 | 85709 | 87538 | + | 3-methylmercaptopropionyl-CoA dehydrogenase (DmdC)                           | FIG00802415 | ff                                                                                                                  |
| fig 6666666.28482.peg.2497 | Contig_23 | 87610 | 88386 | + | FIG00826949: hypothetical protein                                            | FIG00826946 | ff                                                                                                                  |
| fig 6666666.28482.peg.2498 | Contig_23 | 88465 | 89211 | + | FIG00828798: hypothetical protein                                            | FIG00828796 | ff                                                                                                                  |
| fig 6666666.28482.peg.2499 | Contig_23 | 89574 | 89227 | - | PaaD-like protein (DUF59) involved in Fe-S cluster assembly                  | FIG00009637 | isu;Iron-sulfur_cluster_assembly                                                                                    |
| fig 6666666.28482.peg.2500 | Contig_23 | 90032 | 89571 | - | Putative iron-sulfur cluster assembly scaffold protein for SUF system, SufE2 | FIG00000306 | icw(1);Iron-sulfur_cluster_assembly                                                                                 |
| fig 6666666.28482.peg.2501 | Contig_23 | 91270 | 90035 | - | Cysteine desulfurase (EC 2.8.1.7), SufS subfamily                            | FIG00229199 | icw(5);Iron-sulfur_cluster_assembly<br>isu;mn5U34_biosynthesis_bacteria<br>isu;Alanine_biosynthesis                 |
| fig 6666666.28482.peg.2502 | Contig_23 | 92054 | 91272 | - | Iron-sulfur cluster assembly ATPase protein SufC                             | FIG00018727 | icw(4);Iron-sulfur_cluster_assembly<br>icw(3);CBSS-196164.1.peg.1690                                                |
| fig 6666666.28482.peg.2503 | Contig_23 | 93208 | 92051 | - | Iron-sulfur cluster assembly protein SufD                                    | FIG00072797 | icw(3);Iron-sulfur_cluster_assembly<br>icw(2);CBSS-196164.1.peg.1690                                                |
| fig 6666666.28482.peg.2504 | Contig_23 | 94647 | 93205 | - | Iron-sulfur cluster assembly protein SufB                                    | FIG00000451 | icw(6);Iron-sulfur_cluster_assembly<br>icw(2);CBSS-196164.1.peg.1690<br>isu;Staphylococcal_phi-Mu50B-like_prophages |
| fig 6666666.28482.peg.2505 | Contig_23 | 95363 | 94644 | - | Iron-sulfur cluster regulator SufR                                           | FIG00003245 | isu;Iron-sulfur_cluster_assembly<br>icw(3);CBSS-196164.1.peg.1690                                                   |

|                            |           |        |        |   |                                                                                                 |             |                                                                                                           |
|----------------------------|-----------|--------|--------|---|-------------------------------------------------------------------------------------------------|-------------|-----------------------------------------------------------------------------------------------------------|
| fig 6666666.28482.peg.2506 | Contig_23 | 95492  | 97192  | + | POSSIBLE CONSERVED<br>INTEGRAL MEMBRANE<br>PROTEIN                                              | FIG01037873 | ff                                                                                                        |
| fig 6666666.28482.peg.2507 | Contig_23 | 97222  | 98142  | + | ABC-type multidrug<br>transport system, ATPase<br>component                                     | FIG00001005 | icw(1);CBSS-196164.1.peg.1690                                                                             |
| fig 6666666.28482.peg.2508 | Contig_23 | 98139  | 98930  | + | ABC-type multidrug<br>transport system,<br>permease component                                   |             | isu;CBSS-196164.1.peg.1690                                                                                |
| fig 6666666.28482.peg.2509 | Contig_23 | 99061  | 100014 | + | Cytochrome oxidase<br>assembly protein                                                          | FIG01121947 | ff                                                                                                        |
| fig 6666666.28482.peg.2510 | Contig_23 | 100568 | 101599 | + | Quinone oxidoreductase<br>(EC 1.6.5.5)                                                          | FIG00002982 | idu(7);Quinone_oxidoreductase_fami<br>ly                                                                  |
| fig 6666666.28482.peg.2511 | Contig_23 | 102629 | 101748 | - | Heme O synthase,<br>protoheme IX<br>farnesyltransferase (EC<br>2.5.1.-) COX10-CtaB              | FIG00000497 | isu;CBSS-316057.3.peg.563<br>icw(2);CBSS-196164.1.peg.1690<br>isu;Biogenesis_of_cytochrome_c_oxi<br>dases |
| fig 6666666.28482.peg.2512 | Contig_23 | 102931 | 105021 | + | Transketolase (EC<br>2.2.1.1)                                                                   | FIG00020289 | isu;Pentose_phosphate_pathway                                                                             |
| fig 6666666.28482.peg.2513 | Contig_23 | 105037 | 106158 | + | Transaldolase (EC 2.2.1.2)                                                                      | FIG00000023 | isu;Fructose_utilization<br>icw(2);Pentose_phosphate_pathway                                              |
| fig 6666666.28482.peg.2514 | Contig_23 | 106155 | 107717 | + | Glucose-6-phosphate 1-<br>dehydrogenase (EC<br>1.1.1.49)                                        | FIG00000332 | icw(1);Pentose_phosphate_pathway                                                                          |
| fig 6666666.28482.peg.2515 | Contig_23 | 107767 | 108678 | + | OpcA, an allosteric<br>effector of glucose-6-<br>phosphate<br>dehydrogenase,<br>actinobacterial | FIG00018823 | ff                                                                                                        |
| fig 6666666.28482.peg.2516 | Contig_24 | 22     | 1884   | + | hypothetical protein                                                                            | FIG00638284 | ff                                                                                                        |

|                            |           |      |      |   |                                                                 |             |                                                                                                                     |
|----------------------------|-----------|------|------|---|-----------------------------------------------------------------|-------------|---------------------------------------------------------------------------------------------------------------------|
| fig 6666666.28482.peg.2517 | Contig_24 | 3274 | 3101 | - | SMALL SECRETED<br>PROTEIN                                       | FIG01361580 | ff                                                                                                                  |
| fig 6666666.28482.peg.2518 | Contig_24 | 3548 | 3348 | - | conserved hypothetical<br>small secreted protein                |             |                                                                                                                     |
| fig 6666666.28482.peg.2519 | Contig_24 | 3648 | 4793 | + | Beta-hexosaminidase (EC<br>3.2.1.52)                            | FIG00001088 | isu;N-Acetyl-<br>Galactosamine_and_Galactosamine_<br>Utilization isu;Chitin_and_N-<br>acetylglucosamine_utilization |
| fig 6666666.28482.peg.2520 | Contig_24 | 4849 | 5469 | + | Transcriptional regulator, TetR family                          | FIG00554417 | ff                                                                                                                  |
| fig 6666666.28482.peg.2521 | Contig_24 | 5495 | 6739 | + | Chloride channel protein                                        | FIG00731882 | ff                                                                                                                  |
| fig 6666666.28482.peg.2522 | Contig_24 | 7584 | 6736 | - | Acyl dehydratase                                                | FIG01303815 | idu(2);CBSS-246196.1.peg.364                                                                                        |
| fig 6666666.28482.peg.2523 | Contig_24 | 8945 | 7581 | - | 3-oxoacyl-[acyl-carrier<br>protein] reductase (EC<br>1.1.1.100) | FIG00621114 | icw(1);CBSS-246196.1.peg.364<br>idu(38);CBSS-164757.7.peg.5020<br>idu(38);Fatty_Acid_Biosynthesis_FASI<br>I         |

|                            |           |       |       |   |                                                                                   |             |                                                                                                                                                                                                                                                                                                                                                                                                                                                                                                                                                                                                                                          |
|----------------------------|-----------|-------|-------|---|-----------------------------------------------------------------------------------|-------------|------------------------------------------------------------------------------------------------------------------------------------------------------------------------------------------------------------------------------------------------------------------------------------------------------------------------------------------------------------------------------------------------------------------------------------------------------------------------------------------------------------------------------------------------------------------------------------------------------------------------------------------|
| fig 6666666.28482.peg.2524 | Contig_24 | 9096  | 10409 | + | 3-ketoacyl-CoA thiolase (EC 2.3.1.16) @ Acetyl-CoA acetyltransferase (EC 2.3.1.9) | FIG00000004 | icw(2);CBSS-246196.1.peg.364<br>icw(1);Serine-glyoxylate_cycle<br>icw(1);Serine-glyoxylate_cycle<br>idu(11);n-<br>Phenylalkanoic_acid_degradation<br>idu(9);Ethylmalonyl-<br>CoA_pathway_of_C2_assimilation,_G<br>JO<br>idu(9);Polyhydroxybutyrate_metabolism<br>idu(11);Polyhydroxybutyrate_metabolism<br>idu(11);Isoleucine_degradation<br>idu(11);Fatty_acid_metabolism_cluster<br>idu(11);Biotin_synthesis_cluster<br>idu(11);Biotin_biosynthesis<br>idu(9);Lysine_fermentation<br>idu(9);Isoprenoid_Biosynthesis<br>idu(9);Butanol_Biosynthesis<br>idu(9);Acetyl-CoA_fermentation_to_Butyrate<br>idu(9);Butyrate_metabolism_cluster |
| fig 6666666.28482.peg.2525 | Contig_24 | 12545 | 10710 | - | 3-methylmercaptopropionyl-CoA dehydrogenase (DmdC)                                | FIG00802415 | ff                                                                                                                                                                                                                                                                                                                                                                                                                                                                                                                                                                                                                                       |
| fig 6666666.28482.peg.2526 | Contig_24 | 12736 | 13779 | + | 2-Oxobutyrate oxidase, putative                                                   | FIG00003889 | ff                                                                                                                                                                                                                                                                                                                                                                                                                                                                                                                                                                                                                                       |

|                            |           |       |       |   |                                                                                     |             |                                                                                      |
|----------------------------|-----------|-------|-------|---|-------------------------------------------------------------------------------------|-------------|--------------------------------------------------------------------------------------|
| fig 6666666.28482.peg.2527 | Contig_24 | 13776 | 14273 | + | Nitrilotriacetate monooxygenase component B (EC 1.14.13.-)                          | FIG00039067 | idu(1);Aromatic_Amin_Catabolism                                                      |
| fig 6666666.28482.peg.2528 | Contig_24 | 15102 | 14353 | - | Succinate dehydrogenase iron-sulfur protein (EC 1.3.99.1)                           | FIG00026006 | icw(1);Serine-glyoxylate_cycle<br>icw(1);TCA_Cycle<br>idu(1);Succinate_dehydrogenase |
| fig 6666666.28482.peg.2529 | Contig_24 | 17030 | 15102 | - | Succinate dehydrogenase flavoprotein subunit (EC 1.3.99.1)                          | FIG00136922 | idu(1);Serine-glyoxylate_cycle<br>idu(1);TCA_Cycle<br>icw(2);Succinate_dehydrogenase |
| fig 6666666.28482.peg.2530 | Contig_24 | 17804 | 17073 | - | putative succinate dehydrogenase [membrane anchor subunit] (succinic dehydrogenase) | FIG00010624 | icw(1);Succinate_dehydrogenase                                                       |
| fig 6666666.28482.peg.2531 | Contig_24 | 18286 | 17990 | - | FIG00820825: hypothetical protein                                                   | FIG00820824 | ff                                                                                   |
| fig 6666666.28482.peg.2532 | Contig_24 | 18364 | 19134 | + | Probable carboxyvinyl-carboxyphosphonate phosphorylmutase (EC 2.7.8.23)             | FIG00012387 | ff                                                                                   |
| fig 6666666.28482.peg.2533 | Contig_24 | 19641 | 19201 | - | Heat shock protein hsp                                                              | FIG01344888 | ff                                                                                   |
| fig 6666666.28482.peg.2534 | Contig_24 | 19856 | 22420 | + | Nitrite reductase [NAD(P)H] large subunit (EC 1.7.1.4)                              | FIG00000873 | icw(2);Nitrate_and_nitrite_ammonifi<br>cation                                        |
| fig 6666666.28482.peg.2535 | Contig_24 | 22434 | 22799 | + | Nitrite reductase [NAD(P)H] small subunit (EC 1.7.1.4)                              | FIG00138942 | icw(1);Nitrate_and_nitrite_ammonifi<br>cation                                        |
| fig 6666666.28482.peg.2536 | Contig_24 | 23194 | 22796 | - | FIG00825710: hypothetical protein                                                   | FIG00825709 | ff                                                                                   |

|                            |           |       |       |   |                                                                                      |             |                                                                                                                                                            |
|----------------------------|-----------|-------|-------|---|--------------------------------------------------------------------------------------|-------------|------------------------------------------------------------------------------------------------------------------------------------------------------------|
| fig 6666666.28482.peg.2537 | Contig_24 | 24005 | 23277 | - | Sirohydrochlorin ferrochelata-<br>se (EC 4.99.1.4)                                   | FIG00132864 | idu(2);Heme_and_Siroheme_Biosynt<br>hesis                                                                                                                  |
| fig 6666666.28482.peg.2538 | Contig_24 | 25147 | 23996 | - | Bifunctional uroporphyrinogen-III<br>synthetase/response<br>regulator domain protein | FIG00816213 | ff                                                                                                                                                         |
| fig 6666666.28482.peg.2539 | Contig_24 | 26607 | 25225 | - | Nitrate/nitrite<br>transporter                                                       | FIG00005529 | idu(2);Nitrate_and_nitrite_ammonific<br>ation                                                                                                              |
| fig 6666666.28482.peg.2540 | Contig_24 | 27388 | 26843 | - | Aminoglycoside 2'-N-<br>acetyltransferase AAC<br>(AAC(2')-IC)                        | FIG01346537 | ff                                                                                                                                                         |
| fig 6666666.28482.peg.2541 | Contig_24 | 28274 | 27390 | - | Allophanate hydrolase 2<br>subunit 2 (EC 3.5.1.54)                                   | FIG00010262 | icw(1);Urea_carboxylase_and_Alloph<br>anate_hydrolase_cluster<br>icw(1);EC699-706                                                                          |
| fig 6666666.28482.peg.2542 | Contig_24 | 28963 | 28289 | - | Allophanate hydrolase 2<br>subunit 1 (EC 3.5.1.54)                                   | FIG00000847 | isu;Urea_carboxylase_and_Allophana<br>te_hydrolase_cluster isu;EC699-706                                                                                   |
| fig 6666666.28482.peg.2543 | Contig_24 | 30006 | 29065 | - | ABC transporter,<br>periplasmic iron-<br>transport lipoprotein                       | FIG01312725 | ff                                                                                                                                                         |
| fig 6666666.28482.peg.2544 | Contig_24 | 31359 | 30109 | - | ATP-dependent DNA<br>ligase (EC 6.5.1.1)                                             | FIG00052980 | idu(2);DNA_replication,_archaeal<br>idu(2);DNA_Repair_Base_Excision<br>idu(2);DNA_ligases                                                                  |
| fig 6666666.28482.peg.2545 | Contig_24 | 31410 | 33098 | + | Long-chain-fatty-acid--<br>CoA ligase (EC 6.2.1.3)                                   | FIG00018699 | idu(72);n-<br>Phenylalkanoic_acid_degradation<br>idu(72);Fatty_acid_metabolism_clust<br>er idu(72);Biotin_synthesis_cluster<br>idu(72);Biotin_biosynthesis |

|                            |           |       |       |   |                                                                  |             |                                                                                    |
|----------------------------|-----------|-------|-------|---|------------------------------------------------------------------|-------------|------------------------------------------------------------------------------------|
| fig 6666666.28482.peg.2546 | Contig_24 | 33444 | 33109 | - | FIG00825611:<br>hypothetical protein                             | FIG00825609 | ff                                                                                 |
| fig 6666666.28482.peg.2547 | Contig_25 | 1532  | 360   | - | FIG00822682:<br>hypothetical protein                             | FIG00822681 | ff                                                                                 |
| fig 6666666.28482.peg.2548 | Contig_25 | 1602  | 2210  | + | Transcriptional regulator, TetR family                           | FIG00554417 | ff                                                                                 |
| fig 6666666.28482.peg.2549 | Contig_25 | 2634  | 2221  | - | FIG00822364:<br>hypothetical protein                             | FIG00822363 | ff                                                                                 |
| fig 6666666.28482.peg.2550 | Contig_25 | 3099  | 2710  | - | secreted protein antigen                                         |             |                                                                                    |
| fig 6666666.28482.peg.2551 | Contig_25 | 3653  | 4132  | + | hypothetical protein                                             |             |                                                                                    |
| fig 6666666.28482.peg.2552 | Contig_25 | 4561  | 4133  | - | hypothetical protein                                             |             |                                                                                    |
| fig 6666666.28482.peg.2553 | Contig_25 | 4938  | 4651  | - | Histone acetyltransferase HPA2 and related acetyltransferases    |             | idu(1);CBSS-216591.1.peg.168                                                       |
| fig 6666666.28482.peg.2554 | Contig_25 | 6205  | 5132  | - | GTP-binding and nucleic acid-binding protein YchF                | FIG00049915 | ff                                                                                 |
| fig 6666666.28482.peg.2555 | Contig_25 | 6335  | 6493  | + | hypothetical protein                                             |             |                                                                                    |
| fig 6666666.28482.peg.2556 | Contig_25 | 7279  | 6686  | - | hypothetical protein                                             |             |                                                                                    |
| fig 6666666.28482.peg.2557 | Contig_25 | 8355  | 7465  | - | 4-hydroxy-3-methylbut-2-enyl diphosphate reductase (EC 1.17.1.2) | FIG00000381 | isu;Nonmevalonate_Branch_of_Isoprenoid_Biosynthesis<br>isu;Isoprenoid_Biosynthesis |
| fig 6666666.28482.peg.2558 | Contig_25 | 8538  | 9128  | + | FIG00997309:<br>hypothetical protein                             | FIG00821685 | ff                                                                                 |
| fig 6666666.28482.peg.2559 | Contig_25 | 9176  | 10378 | + | Exodeoxyribonuclease VII large subunit (EC 3.1.11.6)             | FIG00000323 | isu;Purine_salvage_cluster<br>isu;DNA_repair,_bacterial                            |
| fig 6666666.28482.peg.2560 | Contig_25 | 10452 | 10610 | + | Exodeoxyribonuclease VII small subunit (EC 3.1.11.6)             | FIG00000435 | icw(1);Purine_salvage_cluster<br>icw(1);DNA_repair,_bacterial                      |

|                            |           |       |       |   |                                                                         |             |                                                                    |
|----------------------------|-----------|-------|-------|---|-------------------------------------------------------------------------|-------------|--------------------------------------------------------------------|
| fig 6666666.28482.peg.2561 | Contig_25 | 10685 | 11770 | + | PROBABLE CHOLESTEROL DEHYDROGENASE                                      | FIG00820427 | ff                                                                 |
| fig 6666666.28482.peg.2562 | Contig_25 | 12365 | 11802 | - | Transcriptional regulator, TetR family                                  | FIG00554417 | ff                                                                 |
| fig 6666666.28482.peg.2563 | Contig_25 | 14028 | 12493 | - | Carboxylesterase, type B                                                | FIG01336027 | ff                                                                 |
| fig 6666666.28482.peg.2564 | Contig_25 | 14805 | 14044 | - | Dienelactone hydrolase family protein                                   | FIG00824265 | ff                                                                 |
| fig 6666666.28482.peg.2565 | Contig_25 | 15539 | 14856 | - | FIG00820022: hypothetical protein                                       | FIG00820021 | ff                                                                 |
| fig 6666666.28482.peg.2566 | Contig_25 | 15596 | 16630 | + | Fructose-1,6-bisphosphatase, GlpX type (EC 3.1.3.11)                    | FIG00138413 | ff                                                                 |
| fig 6666666.28482.peg.2567 | Contig_25 | 16667 | 18082 | + | Fumarate hydratase class II (EC 4.2.1.2)                                | FIG00000340 | isu;TCA_Cycle                                                      |
| fig 6666666.28482.peg.2568 | Contig_25 | 18100 | 19089 | + | PROBABLE MEMBRANE GLYCINE AND PROLINE RICH PROTEIN                      | FIG01270577 | ff                                                                 |
| fig 6666666.28482.peg.2569 | Contig_25 | 20533 | 19079 | - | Adenylate cyclase (EC 4.6.1.1)                                          | FIG00001294 | idu(25);cAMP_signaling_in_bacteria                                 |
| fig 6666666.28482.peg.2570 | Contig_25 | 21519 | 20644 | - | Possible glycosyl hydrolase (EC 3.-.-)                                  | FIG01314096 | ff                                                                 |
| fig 6666666.28482.peg.2571 | Contig_25 | 22954 | 21653 | - | Predicted ATPase related to phosphate starvation-inducible protein PhoH | FIG00075426 | isu;Phosphate_metabolism                                           |
| fig 6666666.28482.peg.2572 | Contig_25 | 24043 | 23216 | - | Fatty acid desaturase occurring in virulence cluster                    | FIG00996037 | idu(2);Mycobacterium_virulence_operon_involved_in_lipid_metabolism |

|                            |           |       |       |   |                                                           |             |                                                                |
|----------------------------|-----------|-------|-------|---|-----------------------------------------------------------|-------------|----------------------------------------------------------------|
| fig 6666666.28482.peg.2573 | Contig_25 | 25448 | 24129 | - | Serine hydroxymethyltransferase 1 (EC 2.1.2.1)            | FIG00147090 | isu;Serine_Biosynthesis                                        |
| fig 6666666.28482.peg.2574 | Contig_25 | 25592 | 26464 | + | Pantothenate kinase (EC 2.7.1.33)                         | FIG00000936 | isu;Coenzyme_A_Biosynthesis                                    |
| fig 6666666.28482.peg.2575 | Contig_25 | 26902 | 26486 | - | FIG00820427: hypothetical protein                         | FIG00820425 | ff                                                             |
| fig 6666666.28482.peg.2576 | Contig_25 | 28485 | 27106 | - | FIG00821548: hypothetical protein                         | FIG00821546 | ff                                                             |
| fig 6666666.28482.peg.2577 | Contig_25 | 29316 | 28528 | - | Undecaprenyl pyrophosphate synthetase (EC 2.5.1.31)       | FIG00000110 | ff                                                             |
| fig 6666666.28482.peg.2578 | Contig_25 | 29453 | 30205 | + | COG1272: Predicted membrane protein hemolysin III homolog | FIG01323667 | ff                                                             |
| fig 6666666.28482.peg.2579 | Contig_25 | 30597 | 30214 | - | Steroid delta-isomerase (EC 5.3.3.1)                      | FIG01310988 | ff                                                             |
| fig 6666666.28482.peg.2580 | Contig_25 | 32635 | 30620 | - | Thymidylate kinase (EC 2.7.4.9)                           | FIG00000175 | idu(1);pyrimidine_conversions<br>idu(1);CBSS-393133.3.peg.2787 |
| fig 6666666.28482.peg.2581 | Contig_25 | 32888 | 32622 | - | probable secreted protein                                 | FIG00999229 | ff                                                             |
| fig 6666666.28482.peg.2582 | Contig_25 | 33757 | 32885 | - | Mycothiol S-conjugate amidase Mca                         | FIG00006621 | isu;Glutathione_analogs:_mycothiol                             |
| fig 6666666.28482.peg.2583 | Contig_25 | 33758 | 33898 | + | hypothetical protein                                      |             |                                                                |
| fig 6666666.28482.peg.2584 | Contig_25 | 33895 | 34329 | + | FIG00821098: hypothetical protein                         | FIG00821096 | ff                                                             |
| fig 6666666.28482.peg.2585 | Contig_25 | 34497 | 35045 | + | Transcription elongation factor GreA                      | FIG00000288 | isu;Transcription_factors_bacterial                            |
| fig 6666666.28482.peg.2586 | Contig_25 | 36284 | 35118 | - | Cystathionine gamma-lyase (EC 4.4.1.1)                    | FIG00001346 | idu(1);Cysteine_Biosynthesis                                   |

|                            |           |       |       |   |                                                                                   |             |                                                                                                                                                                                                                                                                                                                                                                                                                                                                                                                                                                                                                                    |
|----------------------------|-----------|-------|-------|---|-----------------------------------------------------------------------------------|-------------|------------------------------------------------------------------------------------------------------------------------------------------------------------------------------------------------------------------------------------------------------------------------------------------------------------------------------------------------------------------------------------------------------------------------------------------------------------------------------------------------------------------------------------------------------------------------------------------------------------------------------------|
| fig 6666666.28482.peg.2587 | Contig_25 | 36383 | 36823 | + | putative membrane protein                                                         | FIG00672847 | ff                                                                                                                                                                                                                                                                                                                                                                                                                                                                                                                                                                                                                                 |
| fig 6666666.28482.peg.2588 | Contig_25 | 37439 | 36786 | - | Proline-rich antigen homolog                                                      | FIG01375448 | ff                                                                                                                                                                                                                                                                                                                                                                                                                                                                                                                                                                                                                                 |
| fig 6666666.28482.peg.2589 | Contig_25 | 38927 | 37521 | - | Cystathionine beta-synthase (EC 4.2.1.22)                                         | FIG00022427 | icw(1);Cysteine_Biosynthesis                                                                                                                                                                                                                                                                                                                                                                                                                                                                                                                                                                                                       |
| fig 6666666.28482.peg.2590 | Contig_25 | 39969 | 39082 | - | esterase                                                                          | FIG01380254 | ff                                                                                                                                                                                                                                                                                                                                                                                                                                                                                                                                                                                                                                 |
| fig 6666666.28482.peg.2591 | Contig_25 | 40393 | 41370 | + | CONSERVED EXPORTED PROTEIN                                                        | FIG00815422 | ff                                                                                                                                                                                                                                                                                                                                                                                                                                                                                                                                                                                                                                 |
| fig 6666666.28482.peg.2592 | Contig_25 | 41446 | 42663 | + | 3-ketoacyl-CoA thiolase (EC 2.3.1.16) @ Acetyl-CoA acetyltransferase (EC 2.3.1.9) | FIG00000004 | idu(11);CBSS-246196.1.peg.364<br>idu(9);Serine-glyoxylate_cycle<br>idu(11);Serine-glyoxylate_cycle<br>idu(11);n-Phenylalkanoic_acid_degradation<br>idu(9);Ethylmalonyl-CoA_pathway_of_C2_assimilation,_G<br>JO<br>idu(9);Polyhydroxybutyrate_metabolism<br>idu(11);Polyhydroxybutyrate_metabolism<br>idu(11);Isoleucine_degradation<br>idu(11);Fatty_acid_metabolism_cluster<br>idu(11);Biotin_synthesis_cluster<br>idu(11);Biotin_biosynthesis<br>idu(9);Lysine_fermentation<br>idu(9);Isoprenoid_Biosynthesis<br>idu(9);Butanol_Biosynthesis<br>idu(9);Acetyl-CoA_fermentation_to_Butyrate<br>idu(9);Butyrate_metabolism_cluster |

|                            |           |       |       |   |                                                                               |             |                                                                                                                               |
|----------------------------|-----------|-------|-------|---|-------------------------------------------------------------------------------|-------------|-------------------------------------------------------------------------------------------------------------------------------|
| fig 6666666.28482.peg.2593 | Contig_25 | 43674 | 42781 | - | putative sigma factor                                                         |             |                                                                                                                               |
| fig 6666666.28482.peg.2594 | Contig_25 | 44831 | 43671 | - | NADH dehydrogenase<br>(EC 1.6.99.3)                                           | FIG00008708 | idu(6);Respiratory_dehydrogenases_<br>1<br>idu(6);PPE_gene_cluster_in_Mycobac<br>teria<br>idu(6);Riboflavin_synthesis_cluster |
| fig 6666666.28482.peg.2595 | Contig_25 | 45803 | 44967 | - | PROBABLE CONSERVED<br>TRANSMEMBRANE<br>PROTEIN                                | FIG00662132 | ff                                                                                                                            |
| fig 6666666.28482.peg.2596 | Contig_25 | 46037 | 47083 | + | 3-hydroxyisobutyryl-CoA<br>hydrolase (EC 3.1.2.4)                             | FIG00133111 | isu;Valine_degradation                                                                                                        |
| fig 6666666.28482.peg.2597 | Contig_25 | 47097 | 47876 | + | Enoyl-CoA hydratase<br>[valine degradation] (EC<br>4.2.1.17)                  | FIG00014562 | icw(1);Valine_degradation                                                                                                     |
| fig 6666666.28482.peg.2598 | Contig_25 | 47886 | 49625 | + | Predicted membrane<br>protein (DUF2319)                                       | FIG01329746 | ff                                                                                                                            |
| fig 6666666.28482.peg.2599 | Contig_26 | 1241  | 198   | - | N5,N10-<br>methylenetetrahydromet<br>hanopterin reductase-<br>related protein | FIG01460162 | ff                                                                                                                            |
| fig 6666666.28482.peg.2600 | Contig_26 | 1637  | 1287  | - | FIG00824417:<br>hypothetical protein                                          | FIG00824416 | ff                                                                                                                            |
| fig 6666666.28482.peg.2601 | Contig_26 | 2119  | 1691  | - | Transcriptional regulator,<br>MarR family                                     | FIG00554610 | ff                                                                                                                            |
| fig 6666666.28482.peg.2602 | Contig_26 | 2215  | 2880  | + | Methyltransferase type<br>11                                                  |             |                                                                                                                               |
| fig 6666666.28482.peg.2603 | Contig_26 | 3639  | 2893  | - | FIG00996653:<br>hypothetical protein                                          | FIG00821869 | ff                                                                                                                            |

|                            |           |       |       |   |                                                                                |             |                                              |                                                                 |
|----------------------------|-----------|-------|-------|---|--------------------------------------------------------------------------------|-------------|----------------------------------------------|-----------------------------------------------------------------|
| fig 6666666.28482.peg.2604 | Contig_26 | 3964  | 3758  | - | Putative uncharacterized protein BCG_1587                                      |             |                                              |                                                                 |
| fig 6666666.28482.peg.2605 | Contig_26 | 4459  | 6336  | + | Glucosamine--fructose-6-phosphate aminotransferase [isomerizing] (EC 2.6.1.16) | FIG00000038 | isu;Sialic_Acid_Metabolism                   | isu;UDP-N-acetylmuramate_from_Fructose-6-phosphate_Biosynthesis |
| fig 6666666.28482.peg.2606 | Contig_26 | 6427  | 7257  | + | PROBABLE CONSERVED TRANSMEMBRANE PROTEIN                                       | FIG00662132 | ff                                           |                                                                 |
| fig 6666666.28482.peg.2607 | Contig_26 | 7293  | 8009  | + | POSSIBLE CONSERVED TRANSMEMBRANE PROTEIN                                       | FIG01417063 | ff                                           |                                                                 |
| fig 6666666.28482.peg.2608 | Contig_26 | 8013  | 9863  | + | Acylamino-acid-releasing enzyme                                                | FIG01330763 | ff                                           |                                                                 |
| fig 6666666.28482.peg.2609 | Contig_26 | 9881  | 11299 | + | NAD(P)HX epimerase / NAD(P)HX dehydratase                                      | FIG00000592 | isu;YjeE                                     | isu;YjeE                                                        |
| fig 6666666.28482.peg.2610 | Contig_26 | 11320 | 12705 | + | Glutamate decarboxylase (EC 4.1.1.15)                                          | FIG01376814 | ff                                           |                                                                 |
| fig 6666666.28482.peg.2611 | Contig_26 | 12869 | 14056 | + | Alanine racemase (EC 5.1.1.1)                                                  | FIG00001642 | isu;Pyruvate_Alanine_Serine_Interconversions | isu;Alanine_biosynthesis                                        |
| fig 6666666.28482.peg.2612 | Contig_26 | 14109 | 15161 | + | Hydrolase (HAD superfamily)                                                    | FIG00510207 | ff                                           |                                                                 |
| fig 6666666.28482.peg.2613 | Contig_26 | 15154 | 15681 | + | ATPase YjeE, predicted to have essential role in cell wall biosynthesis        | FIG00000228 | ff                                           |                                                                 |

|                            |           |       |       |   |                                                                                          |             |                                                                                                                                    |
|----------------------------|-----------|-------|-------|---|------------------------------------------------------------------------------------------|-------------|------------------------------------------------------------------------------------------------------------------------------------|
| fig 6666666.28482.peg.2614 | Contig_26 | 15678 | 16298 | + | Inactive homolog of metal-dependent proteases, putative molecular chaperone              | FIG00000247 | ff                                                                                                                                 |
| fig 6666666.28482.peg.2615 | Contig_26 | 16295 | 16762 | + | Ribosomal-protein-S18p-alanine acetyltransferase (EC 2.3.1.-)                            | FIG00122145 | ff                                                                                                                                 |
| fig 6666666.28482.peg.2616 | Contig_26 | 16759 | 17781 | + | YgjD/Kae1/Qri7 family, required for threonylcarbamoyladenosine (t(6)A) formation in tRNA | FIG00134348 | ff                                                                                                                                 |
| fig 6666666.28482.peg.2617 | Contig_26 | 18033 | 18335 | + | Heat shock protein 60 family co-chaperone GroES                                          | FIG00009229 | isu;GroEL_GroES                                                                                                                    |
| fig 6666666.28482.peg.2618 | Contig_26 | 18413 | 20032 | + | Heat shock protein 60 family chaperone GroEL                                             | FIG00000056 | idu(1);Staphylococcal_pathogenicity_islands_SaPI icw(1);GroEL_GroES                                                                |
| fig 6666666.28482.peg.2619 | Contig_26 | 21108 | 20092 | - | Alcohol dehydrogenase (EC 1.1.1.1)                                                       | FIG01007502 | idu(17);Glycerolipid_and_Glycerophospholipid_Metabolism_in_Bacteria idu(17);Fermentations:_Mixed_acid idu(17);Butanol_Biosynthesis |
| fig 6666666.28482.peg.2620 | Contig_26 | 21210 | 21779 | + | Transcriptional regulator, TetR family                                                   |             |                                                                                                                                    |
| fig 6666666.28482.peg.2621 | Contig_26 | 21982 | 23367 | + | Adenylate cyclase (EC 4.6.1.1)                                                           | FIG00001294 | icw(1);cAMP_signaling_in_bacteria                                                                                                  |
| fig 6666666.28482.peg.2622 | Contig_26 | 23455 | 24957 | + | Adenylate cyclase (EC 4.6.1.1)                                                           | FIG00001294 | icw(1);cAMP_signaling_in_bacteria                                                                                                  |
| fig 6666666.28482.peg.2623 | Contig_26 | 25052 | 26152 | + | FIG01123205: hypothetical protein                                                        | FIG01123204 | ff                                                                                                                                 |

|                            |           |       |       |   |                                                                   |             |                                                                                           |
|----------------------------|-----------|-------|-------|---|-------------------------------------------------------------------|-------------|-------------------------------------------------------------------------------------------|
| fig 6666666.28482.peg.2624 | Contig_26 | 26886 | 26158 | - | Superoxide dismutase [Cu-Zn] precursor (EC 1.15.1.1)              | FIG00001181 | idu(2);Oxidative_stress<br>idu(2);Protection_from_Reactive_Oxygen_Species                 |
| fig 6666666.28482.peg.2625 | Contig_26 | 26992 | 27270 | + | hypothetical protein                                              |             |                                                                                           |
| fig 6666666.28482.peg.2626 | Contig_26 | 27457 | 27275 | - | hypothetical protein                                              |             |                                                                                           |
| fig 6666666.28482.peg.2627 | Contig_26 | 27544 | 27669 | + | hypothetical protein                                              |             |                                                                                           |
| fig 6666666.28482.peg.2628 | Contig_26 | 28033 | 27725 | - | Sporulation regulatory protein WhiD                               | FIG00036805 | isu;WhiB_and_WhiB-type_regulatory_proteins_                                               |
| fig 6666666.28482.peg.2629 | Contig_26 | 28399 | 29199 | + | FIG00996157:<br>hypothetical protein                              | FIG00822850 | ff                                                                                        |
| fig 6666666.28482.peg.2630 | Contig_26 | 29281 | 29856 | + | RNA polymerase sigma-70 factor                                    | FIG01303902 | idu(4);CBSS-313593.3.peg.2729<br>idu(4);Transcription_initiation,_bacterial_sigma_factors |
| fig 6666666.28482.peg.2631 | Contig_26 | 29849 | 30607 | + | FIG00997706:<br>hypothetical protein                              | FIG00821000 | ff                                                                                        |
| fig 6666666.28482.peg.2632 | Contig_26 | 31019 | 30609 | - | FIG00820793:<br>hypothetical protein                              | FIG00820792 | ff                                                                                        |
| fig 6666666.28482.peg.2633 | Contig_26 | 31160 | 32773 | + | Inosine-5'-monophosphate dehydrogenase (EC 1.1.1.205)             | FIG00020613 | icw(1);Purine_conversions<br>icw(1);Purine_salvage_cluster                                |
| fig 6666666.28482.peg.2634 | Contig_26 | 32788 | 33915 | + | Inosine-5'-monophosphate dehydrogenase (EC 1.1.1.205)             | FIG00020613 | icw(1);Purine_conversions<br>icw(1);Purine_salvage_cluster                                |
| fig 6666666.28482.peg.2635 | Contig_26 | 33967 | 35703 | + | Cholesterol oxidase (EC 1.1.3.6)                                  | FIG00817191 | ff                                                                                        |
| fig 6666666.28482.peg.2636 | Contig_26 | 36618 | 35713 | - | Alpha-ketoglutarate-dependent taurine dioxygenase (EC 1.14.11.17) | FIG00001391 | idu(1);Alkanesulfonate_assimilation                                                       |
| fig 6666666.28482.peg.2637 | Contig_26 | 36753 | 37262 | + | Transcriptional regulator, TetR family                            | FIG00554417 | ff                                                                                        |

|                            |           |       |       |   |                                                                            |             |                                                                                                                                                    |
|----------------------------|-----------|-------|-------|---|----------------------------------------------------------------------------|-------------|----------------------------------------------------------------------------------------------------------------------------------------------------|
| fig 6666666.28482.peg.2638 | Contig_26 | 39622 | 37256 | - | Maltose phosphorylase (EC 2.4.1.8) / Trehalose phosphorylase (EC 2.4.1.64) | FIG00043765 | isu;Trehalose_Uptake_and_Utilization<br>isu;Trehalose_Biosynthesis<br>isu;Maltose_and_Maltodextrin_Utilization                                     |
| fig 6666666.28482.peg.2639 | Contig_26 | 40359 | 39619 | - | Beta-phosphoglucomutase (EC 5.4.2.6)                                       | FIG00796613 | isu;N-Acetyl-Galactosamine_and_Galactosamine_Utilization<br>icw(1);Trehalose_Uptake_and_Utilization<br>icw(1);Maltose_and_Maltodextrin_Utilization |
| fig 6666666.28482.peg.2640 | Contig_26 | 41073 | 40462 | - | Transcriptional regulator, TetR family                                     | FIG00554417 | ff                                                                                                                                                 |
| fig 6666666.28482.peg.2641 | Contig_26 | 41183 | 42304 | + | hypothetical protein                                                       | FIG00638284 | ff                                                                                                                                                 |
| fig 6666666.28482.peg.2642 | Contig_26 | 42781 | 42275 | - | hypothetical protein                                                       | FIG00638284 | ff                                                                                                                                                 |
| fig 6666666.28482.peg.2643 | Contig_26 | 43180 | 42785 | - | hypothetical protein                                                       |             |                                                                                                                                                    |
| fig 6666666.28482.peg.2644 | Contig_26 | 44061 | 43177 | - | hydrolase, alpha/beta fold family                                          |             |                                                                                                                                                    |
| fig 6666666.28482.peg.2645 | Contig_26 | 44870 | 44067 | - | hypothetical protein                                                       | FIG00638284 | ff                                                                                                                                                 |
| fig 6666666.28482.peg.2646 | Contig_26 | 45691 | 44867 | - | hypothetical protein                                                       | FIG00638284 | ff                                                                                                                                                 |
| fig 6666666.28482.peg.2647 | Contig_26 | 47267 | 45723 | - | FIG00824483: hypothetical protein                                          | FIG00824482 | ff                                                                                                                                                 |
| fig 6666666.28482.peg.2648 | Contig_26 | 47362 | 47997 | + | Transcriptional regulator, HxIR family                                     | FIG00906075 | ff                                                                                                                                                 |
| fig 6666666.28482.peg.2649 | Contig_26 | 48102 | 48980 | + | PPE family protein                                                         | FIG00013075 | idu(57);CBSS-164757.7.peg.5020                                                                                                                     |
| fig 6666666.28482.peg.2650 | Contig_26 | 49497 | 48985 | - | hypothetical protein                                                       |             |                                                                                                                                                    |
| fig 6666666.28482.peg.2651 | Contig_26 | 50597 | 49494 | - | putative cytochrome P450 hydroxylase                                       | FIG00032437 | idu(49);Nitric_oxide_synthase                                                                                                                      |
| fig 6666666.28482.peg.2652 | Contig_26 | 50669 | 51277 | + | Transcriptional regulator, TetR family                                     | FIG00554417 | ff                                                                                                                                                 |
| fig 6666666.28482.peg.2653 | Contig_26 | 51803 | 51240 | - | Transcriptional regulator, TetR family                                     |             |                                                                                                                                                    |

|                            |           |       |       |   |                                                            |                                                                                     |
|----------------------------|-----------|-------|-------|---|------------------------------------------------------------|-------------------------------------------------------------------------------------|
| fig 6666666.28482.peg.2654 | Contig_26 | 51945 | 53141 | + | Acyl-CoA dehydrogenase, type 2, C-terminal domain          |                                                                                     |
| fig 6666666.28482.peg.2655 | Contig_26 | 53709 | 53149 | - | Transcriptional regulator, TetR family                     |                                                                                     |
| fig 6666666.28482.peg.2656 | Contig_26 | 54591 | 53755 | - | oxidoreductase, short chain dehydrogenase/reductase family |                                                                                     |
| fig 6666666.28482.peg.2657 | Contig_26 | 55402 | 54605 | - | short-chain dehydrogenase/reductase SDR                    |                                                                                     |
| fig 6666666.28482.peg.2658 | Contig_26 | 55597 | 56025 | + | membrane protein, MmpS family                              | FIG01309473 ff                                                                      |
| fig 6666666.28482.peg.2659 | Contig_26 | 56022 | 58862 | + | Putative membrane protein                                  | FIG01056920 ff                                                                      |
| fig 6666666.28482.peg.2660 | Contig_26 | 58859 | 59236 | + | hypothetical protein                                       |                                                                                     |
| fig 6666666.28482.peg.2661 | Contig_26 | 59310 | 60845 | + | GMP synthase [glutamine-hydrolyzing] (EC 6.3.5.2)          | FIG00042267 isu;Purine_conversions<br>isu;Staphylococcal_pathogenicity_islands_SaPI |
| fig 6666666.28482.peg.2662 | Contig_26 | 61484 | 60855 | - | Transcriptional regulator, TetR family                     | FIG00554417 ff                                                                      |
| fig 6666666.28482.peg.2663 | Contig_26 | 61604 | 62332 | + | Short-chain dehydrogenase/reductase SDR                    | idu(13);CBSS-164757.7.peg.5020<br>idu(13);Transcription_repair_cluster              |
| fig 6666666.28482.peg.2664 | Contig_26 | 62397 | 63278 | + | NmrA family protein                                        |                                                                                     |
| fig 6666666.28482.peg.2665 | Contig_26 | 63308 | 63721 | + | hypothetical protein                                       |                                                                                     |
| fig 6666666.28482.peg.2666 | Contig_26 | 64309 | 63722 | - | PROBABLE MEMBRANE PROTEIN                                  | FIG00816212 ff                                                                      |
| fig 6666666.28482.peg.2667 | Contig_26 | 64399 | 65055 | + | FIG00821108: hypothetical protein                          | FIG00821107 ff                                                                      |

|                            |           |       |       |   |                                                              |             |                        |
|----------------------------|-----------|-------|-------|---|--------------------------------------------------------------|-------------|------------------------|
| fig 6666666.28482.peg.2668 | Contig_26 | 65061 | 66620 | + | DNA polymerase-like protein PA0670                           | FIG00027620 | ff                     |
| fig 6666666.28482.peg.2669 | Contig_26 | 66770 | 66639 | - | hypothetical protein                                         |             |                        |
| fig 6666666.28482.peg.2670 | Contig_26 | 67896 | 66949 | - | Inosine-uridine preferring nucleoside hydrolase (EC 3.2.2.1) | FIG00000527 | isu;Purine_conversions |
| fig 6666666.28482.peg.2671 | Contig_26 | 68653 | 67907 | - | FIG00826842: hypothetical protein                            | FIG00826839 | ff                     |
| fig 6666666.28482.peg.2672 | Contig_26 | 70648 | 68696 | - | Oxidoreductase, short-chain dehydrogenase/reductase family   | FIG00822305 | ff                     |
| fig 6666666.28482.peg.2673 | Contig_26 | 71369 | 70665 | - | Lipoprotein LpqD                                             | FIG00820321 | ff                     |
| fig 6666666.28482.peg.2674 | Contig_27 | 22    | 150   | + | hypothetical protein                                         |             |                        |
| fig 6666666.28482.peg.2675 | Contig_27 | 192   | 461   | + | conserved hypothetical protein                               |             |                        |
| fig 6666666.28482.peg.2676 | Contig_27 | 3368  | 468   | - | putative LuxR-family transcriptional regulator               |             |                        |
| fig 6666666.28482.peg.2677 | Contig_27 | 3526  | 4917  | + | oxidoreductase, FAD-dependent                                | FIG01896183 | ff                     |
| fig 6666666.28482.peg.2678 | Contig_27 | 4971  | 5228  | + | hypothetical protein                                         |             |                        |
| fig 6666666.28482.peg.2679 | Contig_27 | 5980  | 5234  | - | FIG00828461: hypothetical protein                            | FIG00828458 | ff                     |
| fig 6666666.28482.peg.2680 | Contig_27 | 6108  | 7289  | + | FIG00828381: hypothetical protein                            | FIG00828378 | ff                     |
| fig 6666666.28482.peg.2681 | Contig_27 | 8053  | 7286  | - | hypothetical protein                                         |             |                        |
| fig 6666666.28482.peg.2682 | Contig_27 | 8908  | 8054  | - | FIG00825125: hypothetical protein                            | FIG00825124 | ff                     |
| fig 6666666.28482.peg.2683 | Contig_27 | 10487 | 9096  | - | FIG00825560: hypothetical protein                            | FIG00825558 | ff                     |

|                            |           |       |       |   |                                                                                                                                |             |                                                                      |
|----------------------------|-----------|-------|-------|---|--------------------------------------------------------------------------------------------------------------------------------|-------------|----------------------------------------------------------------------|
| fig 6666666.28482.peg.2684 | Contig_27 | 12764 | 10569 | - | Lead, cadmium, zinc and mercury transporting ATPase (EC 3.6.3.3) (EC 3.6.3.5); Copper-translocating P-type ATPase (EC 3.6.3.4) | FIG00658111 | idu(1);CBSS-196620.1.peg.2477<br>idu(1);Copper_homeostasis           |
| fig 6666666.28482.peg.2685 | Contig_27 | 12973 | 12761 | - | Copper chaperone                                                                                                               | FIG00005595 | icw(1);Copper_homeostasis                                            |
| fig 6666666.28482.peg.2686 | Contig_27 | 14130 | 13084 | - | hypothetical protein                                                                                                           |             |                                                                      |
| fig 6666666.28482.peg.2687 | Contig_27 | 15003 | 14182 | - | FIG00832108:<br>hypothetical protein                                                                                           | FIG00832106 | ff                                                                   |
| fig 6666666.28482.peg.2688 | Contig_27 | 15114 | 15587 | + | FIG00827934:<br>hypothetical protein                                                                                           | FIG00827933 | ff                                                                   |
| fig 6666666.28482.peg.2689 | Contig_27 | 16385 | 17392 | + | FIG00829144:<br>hypothetical protein                                                                                           | FIG00829140 | ff                                                                   |
| fig 6666666.28482.peg.2690 | Contig_27 | 17446 | 19233 | + | Cyclohexanone monooxygenase (EC 1.14.13.22)                                                                                    | FIG00975774 | ff                                                                   |
| fig 6666666.28482.peg.2691 | Contig_27 | 19230 | 20846 | + | Cyclohexanone monooxygenase (EC 1.14.13.22)                                                                                    | FIG00975774 | ff                                                                   |
| fig 6666666.28482.peg.2692 | Contig_27 | 22258 | 20858 | - | hypothetical protein                                                                                                           | FIG00638284 | ff                                                                   |
| fig 6666666.28482.peg.2693 | Contig_27 | 22404 | 23483 | + | Sulfate and thiosulfate binding protein CysP                                                                                   | FIG00001000 | idu(2);Cysteine_Biosynthesis<br>idu(2);Inorganic_Sulfur_Assimilation |
| fig 6666666.28482.peg.2694 | Contig_27 | 23503 | 25242 | + | Sulfate permease                                                                                                               | FIG00005216 | icw(1);Cysteine_Biosynthesis                                         |
| fig 6666666.28482.peg.2695 | Contig_27 | 26085 | 25246 | - | Short chain dehydrogenase                                                                                                      | FIG01310822 | ff                                                                   |
| fig 6666666.28482.peg.2696 | Contig_27 | 27438 | 26140 | - | FIG00821664:<br>hypothetical protein                                                                                           | FIG00821663 | ff                                                                   |
| fig 6666666.28482.peg.2697 | Contig_27 | 28689 | 27871 | - | Short-chain dehydrogenase/reductase SDR precursor                                                                              | FIG00917812 | ff                                                                   |

|                            |           |       |       |   |                                                    |             |                                                                |
|----------------------------|-----------|-------|-------|---|----------------------------------------------------|-------------|----------------------------------------------------------------|
| fig 6666666.28482.peg.2698 | Contig_27 | 29190 | 28690 | - | FIG00828325:<br>hypothetical protein               | FIG00828324 | ff                                                             |
| fig 6666666.28482.peg.2699 | Contig_27 | 29311 | 30171 | + | Transcriptional regulator, IclR family             | FIG00022569 | idu(12);Homogentisate_pathway_of_aromatic_compound_degradation |
| fig 6666666.28482.peg.2700 | Contig_27 | 30851 | 30279 | - | hypothetical protein                               |             |                                                                |
| fig 6666666.28482.peg.2701 | Contig_27 | 30982 | 31938 | + | transcriptional regulator, LysR family             |             |                                                                |
| fig 6666666.28482.peg.2702 | Contig_27 | 32031 | 33437 | + | 2-methylcitrate dehydratase (EC 4.2.1.79)          | FIG00001287 | idu(1);Methylcitrate_cycle                                     |
| fig 6666666.28482.peg.2703 | Contig_27 | 33493 | 34257 | + | POSSIBLE MEMBRANE PROTEIN                          | FIG00692835 | ff                                                             |
| fig 6666666.28482.peg.2704 | Contig_27 | 34258 | 35103 | + | 3-alpha-hydroxysteroid dehydrogenase (EC 1.1.1.50) | FIG00830506 | ff                                                             |
| fig 6666666.28482.peg.2705 | Contig_27 | 36025 | 35435 | - | hypothetical protein                               |             |                                                                |
| fig 6666666.28482.peg.2706 | Contig_27 | 36111 | 36803 | + | short chain dehydrogenase                          |             |                                                                |
| fig 6666666.28482.peg.2707 | Contig_27 | 37045 | 37497 | + | FIG00825553:<br>hypothetical protein               | FIG00825552 | ff                                                             |
| fig 6666666.28482.peg.2708 | Contig_27 | 37499 | 38305 | + | short-chain dehydrogenase/reductase SDR            | FIG00440067 | ff                                                             |
| fig 6666666.28482.peg.2709 | Contig_27 | 39055 | 38309 | - | methyltransferase, UbiE/COQ5 family                | FIG01504808 | ff                                                             |
| fig 6666666.28482.peg.2710 | Contig_27 | 40546 | 39170 | - | Adenylate cyclase (EC 4.6.1.1)                     | FIG00001294 | idu(25);cAMP_signaling_in_bacteria                             |
| fig 6666666.28482.peg.2711 | Contig_27 | 41203 | 40610 | - | Transcriptional regulator, TetR family             | FIG00554417 | ff                                                             |
| fig 6666666.28482.peg.2712 | Contig_27 | 41309 | 42244 | + | FIG00828462:<br>hypothetical protein               | FIG00828461 | ff                                                             |

|                            |           |       |       |   |                                                                      |             |                                                                                                         |
|----------------------------|-----------|-------|-------|---|----------------------------------------------------------------------|-------------|---------------------------------------------------------------------------------------------------------|
| fig 6666666.28482.peg.2713 | Contig_27 | 43218 | 42241 | - | 2-amino-3-carboxymuconate-6-semialdehyde decarboxylase (EC 4.1.1.45) | FIG00010796 | ff                                                                                                      |
| fig 6666666.28482.peg.2714 | Contig_27 | 43357 | 44142 | + | DltE protein                                                         | FIG00823437 | ff                                                                                                      |
| fig 6666666.28482.peg.2715 | Contig_27 | 44258 | 45346 | + | FIG00824533: hypothetical protein                                    | FIG00824532 | ff                                                                                                      |
| fig 6666666.28482.peg.2716 | Contig_28 | 140   | 922   | + | Alpha-acetolactate decarboxylase (EC 4.1.1.5)                        | FIG00001396 | isu;Alpha-acetolactate_operon<br>isu;Acetoin,_butanediol_metabolism                                     |
| fig 6666666.28482.peg.2717 | Contig_28 | 1774  | 1109  | - | hypothetical protein                                                 |             |                                                                                                         |
| fig 6666666.28482.peg.2718 | Contig_28 | 2721  | 1771  | - | hypothetical protein                                                 | FIG00638284 | ff                                                                                                      |
| fig 6666666.28482.peg.2719 | Contig_28 | 2806  | 3588  | + | Putative HTH-type transcriptional regulator                          |             |                                                                                                         |
| fig 6666666.28482.peg.2720 | Contig_28 | 3666  | 4790  | + | glycosyl transferase                                                 |             |                                                                                                         |
| fig 6666666.28482.peg.2721 | Contig_28 | 5170  | 4838  | - | hypothetical protein                                                 |             |                                                                                                         |
| fig 6666666.28482.peg.2722 | Contig_28 | 5438  | 6289  | + | Thiosulfate sulfurtransferase, rhodanese (EC 2.8.1.1)                | FIG00004487 | ff                                                                                                      |
| fig 6666666.28482.peg.2723 | Contig_28 | 7301  | 6291  | - | FIG00821330: hypothetical protein                                    | FIG00821329 | ff                                                                                                      |
| fig 6666666.28482.peg.2724 | Contig_28 | 7475  | 8272  | + | alpha/beta hydrolase fold                                            |             |                                                                                                         |
| fig 6666666.28482.peg.2725 | Contig_28 | 8269  | 9051  | + | 3-oxoacyl-[acyl-carrier protein] reductase (EC 1.1.1.100)            | FIG00621114 | idu(38);CBSS-246196.1.peg.364<br>idu(38);CBSS-164757.7.peg.5020<br>idu(38);Fatty_Acid_Biosynthesis_FASI |
| fig 6666666.28482.peg.2726 | Contig_28 | 9048  | 9911  | + | Coenzyme F420-dependent oxidoreductase                               | FIG00015014 | idu(3);Anaerobic_respiratory_reductases                                                                 |

|                            |           |       |       |   |                                           |             |                              |
|----------------------------|-----------|-------|-------|---|-------------------------------------------|-------------|------------------------------|
| fig 6666666.28482.peg.2727 | Contig_28 | 9924  | 10337 | + | FIG00830078:<br>hypothetical protein      | FIG00830076 | ff                           |
| fig 6666666.28482.peg.2728 | Contig_28 | 10334 | 11062 | + | FIG00824101:<br>hypothetical protein      | FIG00824100 | ff                           |
| fig 6666666.28482.peg.2729 | Contig_28 | 11162 | 11665 | + | LppO                                      | FIG01682981 | ff                           |
| fig 6666666.28482.peg.2730 | Contig_28 | 11892 | 12881 | + | FIG00823423:<br>hypothetical protein      | FIG00823422 | ff                           |
| fig 6666666.28482.peg.2731 | Contig_28 | 14162 | 12963 | - | putative cytochrome<br>P450 hydroxylase   | FIG00032437 | icw(1);Nitric_oxide_synthase |
| fig 6666666.28482.peg.2732 | Contig_28 | 14809 | 14171 | - | Transcriptional regulator,<br>TetR family | FIG00554417 | ff                           |
| fig 6666666.28482.peg.2733 | Contig_28 | 14870 | 14986 | + | hypothetical protein                      |             |                              |
| fig 6666666.28482.peg.2734 | Contig_28 | 15007 | 15768 | + | FIG00820932:<br>hypothetical protein      | FIG00820930 | ff                           |
| fig 6666666.28482.peg.2735 | Contig_28 | 16972 | 15776 | - | putative cytochrome<br>P450 hydroxylase   | FIG00032437 | icw(1);Nitric_oxide_synthase |
| fig 6666666.28482.peg.2736 | Contig_28 | 17961 | 16969 | - | FIG00825406:<br>hypothetical protein      | FIG00825404 | ff                           |
| fig 6666666.28482.peg.2737 | Contig_28 | 19092 | 18031 | - | FIG00826901:<br>hypothetical protein      | FIG00826898 | ff                           |
| fig 6666666.28482.peg.2738 | Contig_28 | 19282 | 20376 | + | hypothetical protein                      | FIG00638284 | ff                           |
| fig 6666666.28482.peg.2739 | Contig_28 | 20386 | 21579 | + | FIG00828083:<br>hypothetical protein      | FIG00828082 | ff                           |
| fig 6666666.28482.peg.2740 | Contig_28 | 22452 | 21724 | - | FIG00826011:<br>hypothetical protein      | FIG00826010 | ff                           |
| fig 6666666.28482.peg.2741 | Contig_28 | 22563 | 23468 | + | Haloalkane dehalogenase<br>(EC 3.8.1.5)   | FIG01364259 | ff                           |
| fig 6666666.28482.peg.2742 | Contig_28 | 24507 | 23476 | - | FIG00833085:<br>hypothetical protein      | FIG00833081 | ff                           |
| fig 6666666.28482.peg.2743 | Contig_28 | 24737 | 25168 | + | FIG00821774:<br>hypothetical protein      | FIG00821772 | ff                           |
| fig 6666666.28482.peg.2744 | Contig_28 | 25923 | 25183 | - | CysQ protein                              | FIG01352967 | ff                           |

|                            |           |       |       |   |                                                                     |             |                                                                 |
|----------------------------|-----------|-------|-------|---|---------------------------------------------------------------------|-------------|-----------------------------------------------------------------|
| fig 6666666.28482.peg.2745 | Contig_28 | 26086 | 26640 | + | FIG00830662:<br>hypothetical protein                                | FIG00830661 | ff                                                              |
| fig 6666666.28482.peg.2746 | Contig_28 | 27808 | 26645 | - | FIG00822698:<br>hypothetical protein                                | FIG00822697 | ff                                                              |
| fig 6666666.28482.peg.2747 | Contig_28 | 28037 | 29092 | + | Oxalate decarboxylase<br>(EC 4.1.1.2)                               | FIG01323605 | ff                                                              |
| fig 6666666.28482.peg.2748 | Contig_28 | 29112 | 29510 | + | FIG00829888:<br>hypothetical protein                                | FIG00829886 | ff                                                              |
| fig 6666666.28482.peg.2749 | Contig_28 | 29577 | 30455 | + | FIG00822009:<br>hypothetical protein                                | FIG00822008 | ff                                                              |
| fig 6666666.28482.peg.2750 | Contig_28 | 30833 | 30426 | - | FIG00825195:<br>hypothetical protein                                | FIG00825190 | ff                                                              |
| fig 6666666.28482.peg.2751 | Contig_28 | 30917 | 31663 | + | PknM                                                                | FIG01539262 | ff                                                              |
| fig 6666666.28482.peg.2752 | Contig_28 | 31885 | 33213 | + | Mg/Co/Ni transporter<br>MgtE / CBS domain                           | FIG00437800 | idu(1);Magnesium_transport                                      |
| fig 6666666.28482.peg.2753 | Contig_28 | 33210 | 34847 | + | Manganese transport<br>protein MntH                                 | FIG00554286 | ff                                                              |
| fig 6666666.28482.peg.2754 | Contig_28 | 34942 | 35184 | + | Excalibur                                                           |             |                                                                 |
| fig 6666666.28482.peg.2755 | Contig_28 | 36390 | 35197 | - | Permeases of the major<br>facilitator superfamily                   | FIG00613966 | ff                                                              |
| fig 6666666.28482.peg.2756 | Contig_28 | 36629 | 37348 | + | Predicted regulator PutR<br>for proline utilization,<br>GntR family | FIG00004161 | idu(2);Proline,_4-<br>hydroxyproline_uptake_and_utilizati<br>on |
| fig 6666666.28482.peg.2757 | Contig_28 | 37565 | 37350 | - | FIG00827338:<br>hypothetical protein                                | FIG00827337 | ff                                                              |
| fig 6666666.28482.peg.2758 | Contig_28 | 39555 | 37633 | - | Chaperone protein HtpG                                              | FIG00000594 | isu;Protein_chaperones                                          |
| fig 6666666.28482.peg.2759 | Contig_28 | 39648 | 40268 | + | FIG00825159:<br>hypothetical protein                                | FIG00825157 | ff                                                              |

|                            |           |       |       |   |                                                                        |             |                                             |
|----------------------------|-----------|-------|-------|---|------------------------------------------------------------------------|-------------|---------------------------------------------|
| fig 6666666.28482.peg.2760 | Contig_28 | 41836 | 40277 | - | FIG00827108:<br>hypothetical protein                                   | FIG00827107 | ff                                          |
| fig 6666666.28482.peg.2761 | Contig_28 | 42672 | 41833 | - | TesB-like acyl-CoA<br>thioesterase 4                                   | FIG00085764 | idu(2);Acyl-CoA_thioesterase_II             |
| fig 6666666.28482.peg.2762 | Contig_28 | 43468 | 42743 | - | FIG00828734:<br>hypothetical protein                                   | FIG00828733 | ff                                          |
| fig 6666666.28482.peg.2763 | Contig_28 | 43666 | 44334 | + | Xanthine dehydrogenase,<br>molybdenum binding<br>subunit (EC 1.17.1.4) | FIG00000962 | ff                                          |
| fig 6666666.28482.peg.2764 | Contig_28 | 45321 | 44401 | - | FIG00822145:<br>hypothetical protein                                   | FIG00822143 | ff                                          |
| fig 6666666.28482.peg.2765 | Contig_28 | 45416 | 45736 | + | hypothetical protein                                                   |             |                                             |
| fig 6666666.28482.peg.2766 | Contig_28 | 45759 | 46226 | + | hypothetical protein                                                   |             |                                             |
| fig 6666666.28482.peg.2767 | Contig_28 | 46858 | 46223 | - | FIG00820691:<br>hypothetical protein                                   | FIG00820690 | ff                                          |
| fig 6666666.28482.peg.2768 | Contig_28 | 48309 | 47371 | - | Transcriptional regulator,<br>AraC family                              | FIG00510130 | ff                                          |
| fig 6666666.28482.peg.2769 | Contig_28 | 48392 | 49648 | + | probable multidrug<br>resistance transporter,<br>MFS superfamily       |             |                                             |
| fig 6666666.28482.peg.2770 | Contig_28 | 50363 | 49671 | - | ThiJ/Pfpl family protein                                               | FIG00015923 | idu(8);CBSS-176280.1.peg.1561               |
| fig 6666666.28482.peg.2771 | Contig_28 | 50676 | 51683 | + | FIG00826852:<br>hypothetical protein                                   | FIG00826845 | ff                                          |
| fig 6666666.28482.peg.2772 | Contig_28 | 51895 | 51680 | - | hypothetical protein                                                   | FIG00638284 | ff                                          |
| fig 6666666.28482.peg.2773 | Contig_28 | 53060 | 51984 | - | Vanillate O-demethylase<br>oxidoreductase (EC<br>1.14.13.-)            | FIG01303955 | idu(2);Anaerobic_respiratory_reducta<br>ses |
| fig 6666666.28482.peg.2774 | Contig_28 | 53976 | 53071 | - | FIG00825795:<br>hypothetical protein                                   | FIG00825791 | ff                                          |

|                            |           |       |       |   |                                                                   |             |                                                                                                                                                            |
|----------------------------|-----------|-------|-------|---|-------------------------------------------------------------------|-------------|------------------------------------------------------------------------------------------------------------------------------------------------------------|
| fig 6666666.28482.peg.2775 | Contig_28 | 54904 | 53996 | - | FF domain protein                                                 | FIG01341765 | ff                                                                                                                                                         |
| fig 6666666.28482.peg.2776 | Contig_28 | 58187 | 54924 | - | Long-chain-fatty-acid--<br>CoA ligase (EC 6.2.1.3)                | FIG00018699 | idu(72);n-<br>Phenylalkanoic_acid_degradation<br>idu(72);Fatty_acid_metabolism_clust<br>er idu(72);Biotin_synthesis_cluster<br>idu(72);Biotin_biosynthesis |
| fig 6666666.28482.peg.2777 | Contig_28 | 58764 | 59006 | + | FIG00825611:<br>hypothetical protein                              | FIG00825609 | ff                                                                                                                                                         |
| fig 6666666.28482.peg.2778 | Contig_28 | 60089 | 59016 | - | FIG00826800:<br>hypothetical protein                              | FIG00826799 | ff                                                                                                                                                         |
| fig 6666666.28482.peg.2779 | Contig_28 | 60266 | 61135 | + | Short-chain<br>dehydrogenase/reductas<br>e SDR                    | FIG00546160 | idu(13);CBSS-164757.7.peg.5020<br>idu(13);Transcription_repair_cluster                                                                                     |
| fig 6666666.28482.peg.2780 | Contig_28 | 61274 | 62191 | + | hypothetical protein                                              | FIG01687736 | ff                                                                                                                                                         |
| fig 6666666.28482.peg.2781 | Contig_28 | 63316 | 62198 | - | EmbR                                                              |             |                                                                                                                                                            |
| fig 6666666.28482.peg.2782 | Contig_28 | 64746 | 63334 | - | Probable<br>serine/threonine-protein<br>kinase pknH (EC 2.7.11.1) |             |                                                                                                                                                            |
| fig 6666666.28482.peg.2783 | Contig_28 | 64936 | 66123 | + | hypothetical protein                                              |             |                                                                                                                                                            |
| fig 6666666.28482.peg.2784 | Contig_28 | 66304 | 67104 | + | hypothetical protein                                              |             |                                                                                                                                                            |
| fig 6666666.28482.peg.2785 | Contig_28 | 67101 | 67763 | + | hypothetical protein                                              |             |                                                                                                                                                            |
| fig 6666666.28482.peg.2786 | Contig_28 | 68001 | 68552 | + | immunogenic protein<br>MPB64/MPT64 precursor                      |             |                                                                                                                                                            |
| fig 6666666.28482.peg.2787 | Contig_28 | 68570 | 69829 | + | hypothetical protein                                              |             |                                                                                                                                                            |
| fig 6666666.28482.peg.2788 | Contig_28 | 70012 | 70755 | + | Lipoprotein LppH                                                  |             |                                                                                                                                                            |
| fig 6666666.28482.peg.2789 | Contig_28 | 71104 | 86379 | + | FIG00820660:<br>hypothetical protein                              | FIG00820658 | ff                                                                                                                                                         |
| fig 6666666.28482.peg.2790 | Contig_28 | 89303 | 86376 | - | hypothetical protein                                              |             |                                                                                                                                                            |

|                            |           |       |       |   |                                                                     |             |                                                                               |
|----------------------------|-----------|-------|-------|---|---------------------------------------------------------------------|-------------|-------------------------------------------------------------------------------|
| fig 6666666.28482.peg.2791 | Contig_28 | 89929 | 89300 | - | conserved hypothetical<br>secreted protein                          | FIG00536634 | ff                                                                            |
| fig 6666666.28482.peg.2792 | Contig_28 | 90064 | 91053 | + | PE family protein                                                   |             |                                                                               |
| fig 6666666.28482.peg.2793 | Contig_28 | 92533 | 91088 | - | Nitrate/nitrite<br>transporter                                      | FIG00005529 | idu(2);Nitrate_and_nitrite_ammonific<br>ation                                 |
| fig 6666666.28482.peg.2794 | Contig_28 | 93066 | 92743 | - | hypothetical protein                                                | FIG00638284 | ff                                                                            |
| fig 6666666.28482.peg.2795 | Contig_28 | 93308 | 93826 | + | conserved hypothetical<br>protein                                   |             |                                                                               |
| fig 6666666.28482.peg.2796 | Contig_28 | 94740 | 93838 | - | FIG00832991:<br>hypothetical protein                                | FIG00832989 | ff                                                                            |
| fig 6666666.28482.peg.2797 | Contig_28 | 94958 | 95845 | + | Endoglucanase A<br>precursor (EC 3.2.1.4)                           | FIG01365504 | ff                                                                            |
| fig 6666666.28482.peg.2798 | Contig_29 | 933   | 487   | - | hypothetical protein                                                | FIG00638284 | ff                                                                            |
| fig 6666666.28482.peg.2799 | Contig_29 | 1925  | 1104  | - | Exodeoxyribonuclease III<br>(EC 3.1.11.2)                           | FIG00000065 | isu;DNA_repair,_bacterial                                                     |
| fig 6666666.28482.peg.2800 | Contig_29 | 2650  | 1928  | - | Histone acetyltransferase<br>HPA2 and related<br>acetyltransferases | FIG00001650 | idu(1);CBSS-216591.1.peg.168                                                  |
| fig 6666666.28482.peg.2801 | Contig_29 | 3273  | 2680  | - | Peptide deformylase (EC<br>3.5.1.88)                                | FIG00000017 | isu;Translation_termination_factors_<br>bacterial                             |
| fig 6666666.28482.peg.2802 | Contig_29 | 3478  | 3786  | + | FIG01000274:<br>hypothetical protein                                | FIG00822393 | ff                                                                            |
| fig 6666666.28482.peg.2803 | Contig_29 | 3851  | 4279  | + | Tuberculin related<br>peptide                                       | FIG01317574 | ff                                                                            |
| fig 6666666.28482.peg.2804 | Contig_29 | 4326  | 5033  | + | Superoxide dismutase<br>[Cu-Zn] precursor (EC<br>1.15.1.1)          | FIG00001181 | idu(2);Oxidative_stress<br>idu(2);Protection_from_Reactive_Ox<br>ygen_Species |
| fig 6666666.28482.peg.2805 | Contig_29 | 5086  | 6153  | + | Carboxylate-amine ligase                                            | FIG01194400 | ff                                                                            |

|                            |           |       |       |   |                                                                           |             |                                                                                                                                                                                                                                                                                                                           |
|----------------------------|-----------|-------|-------|---|---------------------------------------------------------------------------|-------------|---------------------------------------------------------------------------------------------------------------------------------------------------------------------------------------------------------------------------------------------------------------------------------------------------------------------------|
| fig 6666666.28482.peg.2806 | Contig_29 | 6158  | 6808  | + | Uncharacterized protein, similar to the N-terminal domain of Lon protease | FIG01309879 | ff                                                                                                                                                                                                                                                                                                                        |
| fig 6666666.28482.peg.2807 | Contig_29 | 6820  | 7638  | + | Enoyl-CoA hydratase (EC 4.2.1.17)                                         | FIG00033206 | idu(51);n-Phenylalkanoic_acid_degradation idu(51);Polyhydroxybutyrate_metabolism idu(51);Isoleucine_degradation idu(51);Fatty_acid_metabolism_cluster idu(51);Lysine_fermentation idu(51);Butanol_Biosynthesis idu(51);Acetyl-CoA_fermentation_to_Butyrate idu(51);Valine_degradation idu(51);Butyrate_metabolism_cluster |
| fig 6666666.28482.peg.2808 | Contig_29 | 8186  | 7644  | - | hypothetical protein                                                      |             |                                                                                                                                                                                                                                                                                                                           |
| fig 6666666.28482.peg.2809 | Contig_29 | 9124  | 8213  | - | FIG00831858: hypothetical protein                                         | FIG00831853 | ff                                                                                                                                                                                                                                                                                                                        |
| fig 6666666.28482.peg.2810 | Contig_29 | 10593 | 9142  | - | LuxC, acyl-CoA reductase                                                  |             |                                                                                                                                                                                                                                                                                                                           |
| fig 6666666.28482.peg.2811 | Contig_29 | 12026 | 10590 | - | hypothetical protein                                                      | FIG00638284 | ff                                                                                                                                                                                                                                                                                                                        |
| fig 6666666.28482.peg.2812 | Contig_29 | 13607 | 12084 | - | transmembrane efflux pump                                                 |             |                                                                                                                                                                                                                                                                                                                           |
| fig 6666666.28482.peg.2813 | Contig_29 | 14331 | 13591 | - | FIG00826918: hypothetical protein                                         | FIG00826916 | ff                                                                                                                                                                                                                                                                                                                        |
| fig 6666666.28482.peg.2814 | Contig_29 | 14422 | 14988 | + | Transcriptional regulator, TetR family                                    | FIG00554417 | ff                                                                                                                                                                                                                                                                                                                        |

|                            |           |       |       |   |                                                                              |              |                                                                                              |
|----------------------------|-----------|-------|-------|---|------------------------------------------------------------------------------|--------------|----------------------------------------------------------------------------------------------|
| fig 6666666.28482.peg.2815 | Contig_29 | 17127 | 14962 | - | Cell division protein FtsH (EC 3.4.24.-)                                     | FIG00018369  | idu(1);Bacterial_Cell_Division<br>idu(1);Cell_division-<br>ribosomal_stress_proteins_cluster |
| fig 6666666.28482.peg.2816 | Contig_29 | 17987 | 17124 | - | CDP-diacylglycerol--<br>serine O-<br>phosphatidyltransferase<br>(EC 2.7.8.8) | FIG00000775  | isu;Glycerolipid_and_Glycerophosph<br>olipid_Metabolism_in_Bacteria                          |
| fig 6666666.28482.peg.2817 | Contig_29 | 18715 | 17984 | - | Phosphatidylserine<br>decarboxylase (EC<br>4.1.1.65)                         | FIG00001264  | icw(1);Glycerolipid_and_Glycerophos<br>pholipid_Metabolism_in_Bacteria                       |
| fig 6666666.28482.peg.2818 | Contig_29 | 19929 | 18724 | - | Molybdopterin<br>biosynthesis protein<br>MoeA                                | FIG00018218  | idu(1);Molybdenum_cofactor_biosyn<br>thesis                                                  |
| fig 6666666.28482.peg.2819 | Contig_29 | 19984 | 20460 | + | hypothetical protein                                                         | FIG00975774  | ff                                                                                           |
| fig 6666666.28482.peg.2820 | Contig_29 | 20457 | 21902 | + | Cyclohexanone<br>monooxygenase (EC<br>1.14.13.22)                            |              |                                                                                              |
| fig 6666666.28482.peg.2821 | Contig_29 | 22037 | 22204 | + | hypothetical protein                                                         | FIG00826887: | FIG00826886 ff                                                                               |
| fig 6666666.28482.peg.2822 | Contig_29 | 22728 | 22210 | - | hypothetical protein                                                         |              |                                                                                              |
| fig 6666666.28482.peg.2823 | Contig_29 | 22736 | 23437 | + | hypothetical protein                                                         | FIG00830052: | FIG00830045 ff                                                                               |
| fig 6666666.28482.peg.2824 | Contig_29 | 24370 | 23456 | - | probable<br>oxidoreductase/Short-<br>chain dehydrogenase                     | FIG01319309  | ff                                                                                           |
| fig 6666666.28482.peg.2825 | Contig_29 | 24474 | 25040 | + | Transcriptional regulator,<br>TetR family                                    | FIG00554417  | ff                                                                                           |
| fig 6666666.28482.peg.2826 | Contig_29 | 25205 | 26830 | + | Heat shock protein 60<br>family chaperone GroEL                              | FIG00000056  | idu(1);Staphylococcal_pathogenicity_<br>islands_SaPI idu(1);GroEL_GroES                      |
| fig 6666666.28482.peg.2827 | Contig_29 | 26981 | 27814 | + | FIG00827009:<br>hypothetical protein                                         | FIG00827007  | ff                                                                                           |

|                            |           |       |       |   |                                                      |             |                                                                                               |
|----------------------------|-----------|-------|-------|---|------------------------------------------------------|-------------|-----------------------------------------------------------------------------------------------|
| fig 6666666.28482.peg.2828 | Contig_29 | 28261 | 27863 | - | FIG00825576:<br>hypothetical protein                 | FIG00825575 | ff                                                                                            |
| fig 6666666.28482.peg.2829 | Contig_29 | 29671 | 28280 | - | PPE family protein                                   | FIG00013075 | idu(57);CBSS-164757.7.peg.5020                                                                |
| fig 6666666.28482.peg.2830 | Contig_29 | 31461 | 29710 | - | D-aminoacylase (EC<br>3.5.1.81)                      | FIG01332753 | ff                                                                                            |
| fig 6666666.28482.peg.2831 | Contig_29 | 31509 | 31877 | + | PROBABLE<br>LACTOYLGLUTATHIONE<br>LYASE (EC 4.4.1.5) | FIG00884358 | ff                                                                                            |
| fig 6666666.28482.peg.2832 | Contig_29 | 31888 | 32403 | + | FIG00820188:<br>hypothetical protein                 | FIG00820187 | ff                                                                                            |
| fig 6666666.28482.peg.2833 | Contig_29 | 32414 | 33259 | + | FIG00827740:<br>hypothetical protein                 | FIG00827739 | ff                                                                                            |
| fig 6666666.28482.peg.2834 | Contig_29 | 33953 | 33252 | - | FIG111991: hypothetical<br>protein                   | FIG00002457 | isu;CBSS-313593.3.peg.2729                                                                    |
| fig 6666666.28482.peg.2835 | Contig_29 | 34507 | 33950 | - | RNA polymerase sigma-<br>70 factor                   | FIG01303902 | icw(1);CBSS-313593.3.peg.2729<br>idu(4);Transcription_initiation,_bacte<br>rial_sigma_factors |
| fig 6666666.28482.peg.2836 | Contig_29 | 36334 | 34652 | - | DipZ protein                                         | FIG01311174 | ff                                                                                            |
| fig 6666666.28482.peg.2837 | Contig_29 | 39254 | 36366 | - | Putative membrane<br>protein                         | FIG01056920 | ff                                                                                            |
| fig 6666666.28482.peg.2838 | Contig_29 | 39742 | 39251 | - | membrane protein,<br>MmpS family                     | FIG01309473 | ff                                                                                            |
| fig 6666666.28482.peg.2839 | Contig_29 | 40323 | 39994 | - | FIG00820218:<br>hypothetical protein                 | FIG00820217 | ff                                                                                            |
| fig 6666666.28482.peg.2840 | Contig_29 | 40917 | 40519 | - | Possible membrane<br>protein                         | FIG01121868 | ff                                                                                            |

|                            |           |       |       |   |                                     |             |                                                                                                                                                                                                                                                                                                                                                   |
|----------------------------|-----------|-------|-------|---|-------------------------------------|-------------|---------------------------------------------------------------------------------------------------------------------------------------------------------------------------------------------------------------------------------------------------------------------------------------------------------------------------------------------------|
| fig 6666666.28482.peg.2841 | Contig_29 | 41952 | 41044 | - | Enoyl-CoA hydratase (EC 4.2.1.17)   | FIG00033206 | idu(51);n-Phenylalkanoic_acid_degradation<br>idu(51);Polyhydroxybutyrate_metabolism<br>idu(51);Isoleucine_degradation<br>idu(51);Fatty_acid_metabolism_cluster<br>idu(51);Lysine_fermentation<br>idu(51);Butanol_Biosynthesis<br>idu(51);Acetyl-CoA_fermentation_to_Butyrate<br>idu(51);Valine_degradation<br>idu(51);Butyrate_metabolism_cluster |
| fig 6666666.28482.peg.2842 | Contig_29 | 42272 | 41961 | - | FIG00823266: hypothetical protein   | FIG00823265 | ff                                                                                                                                                                                                                                                                                                                                                |
| fig 6666666.28482.peg.2843 | Contig_29 | 42352 | 43608 | + | FIG00832352: hypothetical protein   | FIG00821880 | ff                                                                                                                                                                                                                                                                                                                                                |
| fig 6666666.28482.peg.2844 | Contig_29 | 43837 | 43595 | - | hypothetical protein                |             |                                                                                                                                                                                                                                                                                                                                                   |
| fig 6666666.28482.peg.2845 | Contig_29 | 45927 | 43882 | - | Prolyl endopeptidase (EC 3.4.21.26) | FIG00011272 | isu;Serine_endopeptidase_(EC_3.4.21.-)                                                                                                                                                                                                                                                                                                            |
| fig 6666666.28482.peg.2846 | Contig_29 | 45985 | 47508 | + | Aldehyde dehydrogenase (EC 1.2.1.3) | FIG01292786 | idu(16);Pyruvate_metabolism_II:_acetyl-CoA,_acetogenesis_from_pyruvate<br>idu(16);Glycerolipid_and_Glycerophospholipid_Metabolism_in_Bacteria<br>idu(16);Methylglyoxal_Metabolism                                                                                                                                                                 |
| fig 6666666.28482.peg.2847 | Contig_29 | 47508 | 48335 | + | FIG00821442: hypothetical protein   | FIG00821441 | ff                                                                                                                                                                                                                                                                                                                                                |

|                            |           |       |       |   |                                                                         |             |                                                                                                                                                         |
|----------------------------|-----------|-------|-------|---|-------------------------------------------------------------------------|-------------|---------------------------------------------------------------------------------------------------------------------------------------------------------|
| fig 6666666.28482.peg.2848 | Contig_29 | 48328 | 48861 | + | Possible membrane protein                                               | FIG01121868 | ff                                                                                                                                                      |
| fig 6666666.28482.peg.2849 | Contig_29 | 50949 | 48880 | - | hypothetical protein                                                    | FIG00638284 | ff                                                                                                                                                      |
| fig 6666666.28482.peg.2850 | Contig_29 | 50969 | 51352 | + | Long-chain-fatty-acid--CoA ligase (EC 6.2.1.3)                          | FIG00018699 | idu(72);n-Phenylalkanoic_acid_degradation<br>idu(72);Fatty_acid_metabolism_cluster<br>idu(72);Biotin_synthesis_cluster<br>idu(72);Biotin_biosynthesis   |
| fig 6666666.28482.peg.2851 | Contig_29 | 51590 | 51459 | - | hypothetical protein                                                    |             |                                                                                                                                                         |
| fig 6666666.28482.peg.2852 | Contig_29 | 51752 | 53146 | + | Dihydrolipoamide dehydrogenase (EC 1.8.1.4)                             | FIG00136193 | idu(1);TCA_Cycle<br>idu(1);Photorespiration_(oxidative_C2_cycle)<br>idu(1);Leucine_Degradation_and_HMG-CoA_Metabolism<br>idu(1);Glycine_cleavage_system |
| fig 6666666.28482.peg.2853 | Contig_29 | 53154 | 53438 | + | hypothetical protein                                                    |             |                                                                                                                                                         |
| fig 6666666.28482.peg.2854 | Contig_29 | 53992 | 53435 | - | FIG00821074:<br>hypothetical protein                                    | FIG00821073 | ff                                                                                                                                                      |
| fig 6666666.28482.peg.2855 | Contig_29 | 55413 | 53989 | - | "Transcriptional regulator, XRE family"                                 | FIG00822523 | ff                                                                                                                                                      |
| fig 6666666.28482.peg.2856 | Contig_29 | 55576 | 56370 | + | Acyl-ACP thioesterase                                                   | FIG01319281 | ff                                                                                                                                                      |
| fig 6666666.28482.peg.2857 | Contig_29 | 56657 | 57943 | + | Isocitrate lyase (EC 4.1.3.1) /<br>Methylisocitrate lyase (EC 4.1.3.30) | FIG00148624 | idu(1);Serine-glyoxylate_cycle<br>idu(1);Glyoxylate_bypass<br>isu;Methylcitrate_cycle<br>idu(1);Glyoxylate_bypass_cluster                               |

|                            |           |       |       |   |                                                                                                  |             |                                                                                                                                                                                                                                                                                                                                                                                                   |
|----------------------------|-----------|-------|-------|---|--------------------------------------------------------------------------------------------------|-------------|---------------------------------------------------------------------------------------------------------------------------------------------------------------------------------------------------------------------------------------------------------------------------------------------------------------------------------------------------------------------------------------------------|
| fig 6666666.28482.peg.2858 | Contig_29 | 58099 | 58962 | + | 3-hydroxybutyryl-CoA dehydrogenase (EC 1.1.1.157); 3-hydroxyacyl-CoA dehydrogenase (EC 1.1.1.35) | FIG00000819 | idu(4);n-Phenylalkanoic_acid_degradation idu(4);Polyhydroxybutyrate_metabolism idu(2);Polyhydroxybutyrate_metabolism idu(4);Isoleucine_degradation idu(4);Fatty_acid_metabolism_cluster idu(2);Lysine_fermentation idu(2);Butanol_Biosynthesis idu(2);Acetyl-CoA_fermentation_to_Butyrate idu(4);Acetyl-CoA_fermentation_to_Butyrate idu(4);Valine_degradation idu(4);Butyrate_metabolism_cluster |
| fig 6666666.28482.peg.2859 | Contig_29 | 59046 | 59906 | + | POSSIBLE MYCOLIC ACID SYNTHASE UMAA1                                                             | FIG01316311 | ff                                                                                                                                                                                                                                                                                                                                                                                                |
| fig 6666666.28482.peg.2860 | Contig_29 | 60794 | 59931 | - | Cyclopropane-fatty-acyl-phospholipid synthase (EC 2.1.1.79)                                      | FIG00001555 | ff                                                                                                                                                                                                                                                                                                                                                                                                |
| fig 6666666.28482.peg.2861 | Contig_29 | 61951 | 60938 | - | FIG00820166: hypothetical protein                                                                | FIG00820164 | ff                                                                                                                                                                                                                                                                                                                                                                                                |
| fig 6666666.28482.peg.2862 | Contig_29 | 62665 | 61964 | - | "Transcriptional regulator, TetR family"                                                         | FIG01310990 | ff                                                                                                                                                                                                                                                                                                                                                                                                |
| fig 6666666.28482.peg.2863 | Contig_29 | 62810 | 62685 | - | hypothetical protein                                                                             |             |                                                                                                                                                                                                                                                                                                                                                                                                   |
| fig 6666666.28482.peg.2864 | Contig_29 | 62931 | 64142 | + | Possible membrane protein                                                                        | FIG01121868 | ff                                                                                                                                                                                                                                                                                                                                                                                                |

|                            |           |       |       |   |                                                              |             |                                                                                                   |
|----------------------------|-----------|-------|-------|---|--------------------------------------------------------------|-------------|---------------------------------------------------------------------------------------------------|
| fig 6666666.28482.peg.2865 | Contig_29 | 64227 | 64646 | + | "Transcriptional regulator, XRE family"                      | FIG00822523 | ff                                                                                                |
| fig 6666666.28482.peg.2866 | Contig_29 | 64793 | 65386 | + | Iron-regulated heparin binding hemagglutinin HbhA (Adhesin)  | FIG00819985 | ff                                                                                                |
| fig 6666666.28482.peg.2867 | Contig_29 | 65475 | 65750 | + | FIG00820770: hypothetical membrane protein                   | FIG00820769 | ff                                                                                                |
| fig 6666666.28482.peg.2868 | Contig_29 | 65755 | 66174 | + | POSSIBLE CONSERVED SECRETED PROTEIN                          | FIG00996000 | ff                                                                                                |
| fig 6666666.28482.peg.2869 | Contig_29 | 66175 | 66864 | + | Deoxyribose-phosphate aldolase (EC 4.1.2.4)                  | FIG00000450 | isu;Deoxyribose_and_Deoxynucleoside_Catabolism                                                    |
| fig 6666666.28482.peg.2870 | Contig_29 | 67661 | 66861 | - | Possible membrane protein                                    | FIG01121868 | ff                                                                                                |
| fig 6666666.28482.peg.2871 | Contig_29 | 68734 | 67898 | - | Carbon-nitrogen hydrolase                                    | FIG00554419 | ff                                                                                                |
| fig 6666666.28482.peg.2872 | Contig_29 | 69350 | 68826 | - | hypothetical protein                                         |             |                                                                                                   |
| fig 6666666.28482.peg.2873 | Contig_29 | 69377 | 70474 | + | UDP-N-acetylenolpyruvoylglucosamine reductase (EC 1.1.1.158) | FIG00000163 | isu;UDP-N-acetylmuramate_from_Fructose-6-phosphate_Biosynthesis<br>isu;Peptidoglycan_Biosynthesis |
| fig 6666666.28482.peg.2874 | Contig_29 | 70596 | 71885 | + | Possible lipoprotein LprQ                                    | FIG00864239 | ff                                                                                                |
| fig 6666666.28482.peg.2875 | Contig_29 | 72585 | 71869 | - | Serine 3-dehydrogenase                                       | FIG00814703 | ff                                                                                                |
| fig 6666666.28482.peg.2876 | Contig_29 | 72849 | 74102 | + | Transcriptional regulatory protein                           | FIG00447785 | ff                                                                                                |

|                            |           |       |       |   |                                                                                                              |             |                                                                                                                                                          |
|----------------------------|-----------|-------|-------|---|--------------------------------------------------------------------------------------------------------------|-------------|----------------------------------------------------------------------------------------------------------------------------------------------------------|
| fig 6666666.28482.peg.2877 | Contig_29 | 74155 | 75486 | + | Glycosyltransferase MshA involved in mycothiol biosynthesis (EC 2.4.1.-)                                     | FIG01295925 | isu;Glutathione_analogs:_mycothiol                                                                                                                       |
| fig 6666666.28482.peg.2878 | Contig_29 | 75483 | 76001 | + | Uncharacterized protein Rv0487/MT0505 clustered with mycothiol biosynthesis gene                             | FIG00020314 | icw(1);Glutathione_analogs:_mycothiol                                                                                                                    |
| fig 6666666.28482.peg.2879 | Contig_29 | 76025 | 76774 | + | Phosphoglycerate mutase (EC 5.4.2.1)                                                                         | FIG00005840 | idu(2);Phosphoglycerate_mutase_protein_family                                                                                                            |
| fig 6666666.28482.peg.2880 | Contig_29 | 76930 | 78144 | + | Phosphate regulon sensor protein PhoR (SphS) (EC 2.7.13.3); Sensor-like histidine kinase senX3 (EC 2.7.13.3) | FIG00138089 | icw(1);High_affinity_phosphate_transporter_and_control_of_PHO_regulon<br>isu;Phosphate_metabolism<br>icw(1);PhoR-PhoB_two-component_regulatory_system    |
| fig 6666666.28482.peg.2881 | Contig_29 | 78141 | 78824 | + | Phosphate regulon transcriptional regulatory protein PhoB (SphR); Sensory transduction protein regX3         | FIG00137819 | idu(1);High_affinity_phosphate_transporter_and_control_of_PHO_regulon<br>icw(1);Phosphate_metabolism<br>idu(1);PhoR-PhoB_two-component_regulatory_system |
| fig 6666666.28482.peg.2882 | Contig_29 | 80781 | 78928 | - | GMC-type oxidoreductase                                                                                      | FIG01438966 | ff                                                                                                                                                       |
| fig 6666666.28482.peg.2883 | Contig_29 | 81065 | 80778 | - | FIG00823091: hypothetical protein                                                                            | FIG00823088 | ff                                                                                                                                                       |
| fig 6666666.28482.peg.2884 | Contig_29 | 82060 | 81104 | - | FIG00824158: hypothetical protein                                                                            | FIG00824157 | ff                                                                                                                                                       |

|                            |           |       |       |   |                                                                      |             |                                                                                                                                                                                                                 |
|----------------------------|-----------|-------|-------|---|----------------------------------------------------------------------|-------------|-----------------------------------------------------------------------------------------------------------------------------------------------------------------------------------------------------------------|
| fig 6666666.28482.peg.2885 | Contig_29 | 82137 | 82859 | + | Lactate-responsive regulator LldR in Enterobacteria, GntR family     | FIG00004506 | isu;Lactate_utilization                                                                                                                                                                                         |
| fig 6666666.28482.peg.2886 | Contig_29 | 83658 | 82873 | - | FIG00820527: hypothetical protein                                    | FIG00820526 | ff                                                                                                                                                                                                              |
| fig 6666666.28482.peg.2887 | Contig_29 | 83754 | 84770 | + | Exopolyphosphatase (EC 3.6.1.11)                                     | FIG00066575 | idu(2);Polyphosphate<br>idu(2);Phosphate_metabolism                                                                                                                                                             |
| fig 6666666.28482.peg.2888 | Contig_29 | 84818 | 85705 | + | hypothetical protein                                                 |             |                                                                                                                                                                                                                 |
| fig 6666666.28482.peg.2889 | Contig_29 | 85722 | 86564 | + | "AP endonuclease, family protein 2"                                  | FIG00820391 | ff                                                                                                                                                                                                              |
| fig 6666666.28482.peg.2890 | Contig_29 | 86590 | 87429 | + | TesB-like acyl-CoA thioesterase 3                                    | FIG00020817 | isu;Acyl-CoA_thioesterase_II                                                                                                                                                                                    |
| fig 6666666.28482.peg.2891 | Contig_29 | 87457 | 88329 | + | Pyrroline-5-carboxylate reductase (EC 1.5.1.2)                       | FIG00133325 | isu;Proline_Synthesis<br>isu;A_Hypothetical_Protein_Related_<br>to_Proline_Metabolism                                                                                                                           |
| fig 6666666.28482.peg.2892 | Contig_29 | 88590 | 88727 | + | hypothetical protein                                                 |             |                                                                                                                                                                                                                 |
| fig 6666666.28482.peg.2893 | Contig_29 | 89018 | 90133 | + | UDP-glucose 4-epimerase (EC 5.1.3.2)                                 | FIG00022300 | idu(4);Rhamnose_containing_glycans<br>idu(4);Lactose_and_Galactose_Uptak<br>e_and_Utilization idu(4);N-<br>linked_Glycosylation_in_Bacteria<br>idu(4);Lacto-N-Biose_I_and_Galacto-<br>N-Biose_Metabolic_Pathway |
| fig 6666666.28482.peg.2894 | Contig_29 | 90250 | 91206 | + | Phospholipid/glycerol acyltransferase                                | FIG00815019 | ff                                                                                                                                                                                                              |
| fig 6666666.28482.peg.2895 | Contig_29 | 92140 | 91220 | - | Cyclopropane-fatty-acyl-phospholipid synthase 2, CmaA2 (EC 2.1.1.79) | FIG01314782 | ff                                                                                                                                                                                                              |

|                            |           |       |        |   |                                                                                                                 |             |                                                                                                                                                                       |
|----------------------------|-----------|-------|--------|---|-----------------------------------------------------------------------------------------------------------------|-------------|-----------------------------------------------------------------------------------------------------------------------------------------------------------------------|
| fig 6666666.28482.peg.2896 | Contig_29 | 92667 | 92152  | - | (3R)-hydroxyacyl-ACP<br>dehydratase subunit<br>HadA                                                             | FIG00821897 | ff                                                                                                                                                                    |
| fig 6666666.28482.peg.2897 | Contig_29 | 93621 | 92710  | - | Phosphoserine<br>phosphatase (EC 3.1.3.3)                                                                       | FIG00000149 | idu(3);CBSS-336982.3.peg.3874<br>idu(3);Serine_Biosynthesis                                                                                                           |
| fig 6666666.28482.peg.2898 | Contig_29 | 94012 | 93740  | - | FIG00830030:<br>hypothetical protein                                                                            | FIG00830027 | ff                                                                                                                                                                    |
| fig 6666666.28482.peg.2899 | Contig_29 | 94301 | 94023  | - | putative ESAT-6 like<br>protein 13 esxF                                                                         |             |                                                                                                                                                                       |
| fig 6666666.28482.peg.2900 | Contig_29 | 94418 | 94675  | + | FIG00822170:<br>hypothetical protein                                                                            | FIG00822168 | ff                                                                                                                                                                    |
| fig 6666666.28482.peg.2901 | Contig_29 | 94806 | 94627  | - | hypothetical protein                                                                                            |             |                                                                                                                                                                       |
| fig 6666666.28482.peg.2902 | Contig_29 | 94777 | 96147  | + | Glutamyl-tRNA reductase<br>(EC 1.2.1.70)                                                                        | FIG00004795 | icw(2);Heme_and_Siroheme_Biosynt<br>hesis                                                                                                                             |
| fig 6666666.28482.peg.2903 | Contig_29 | 96152 | 97105  | + | Porphobilinogen<br>deaminase (EC 2.5.1.61)                                                                      | FIG00000363 | icw(3);Heme_and_Siroheme_Biosynt<br>hesis                                                                                                                             |
| fig 6666666.28482.peg.2904 | Contig_29 | 97173 | 98795  | + | Uroporphyrinogen-III<br>methyltransferase (EC<br>2.1.1.107) /<br>Uroporphyrinogen-III<br>synthase (EC 4.2.1.75) | FIG00137145 | idu(1);Dissimilatory_nitrite_reductas<br>e<br>isu;Heme_and_Siroheme_Biosynthesi<br>s<br>icw(3);Heme_and_Siroheme_Biosynt<br>hesis<br>idu(1);Coenzyme_B12_biosynthesis |
| fig 6666666.28482.peg.2905 | Contig_29 | 98995 | 99882  | + | Porphobilinogen<br>synthase (EC 4.2.1.24)                                                                       | FIG00000348 | icw(1);Heme_and_Siroheme_Biosynt<br>hesis                                                                                                                             |
| fig 6666666.28482.peg.2906 | Contig_29 | 99896 | 100450 | + | Transmembrane<br>transport protein MmpL2                                                                        | FIG00999337 | ff                                                                                                                                                                    |

|                            |           |        |        |   |                                                                                 |             |                                                                                   |
|----------------------------|-----------|--------|--------|---|---------------------------------------------------------------------------------|-------------|-----------------------------------------------------------------------------------|
| fig 6666666.28482.peg.2907 | Contig_29 | 100447 | 100692 | + | putative transmembrane protein                                                  |             |                                                                                   |
| fig 6666666.28482.peg.2908 | Contig_29 | 101004 | 100696 | - | FIG00829481:                                                                    | FIG00829479 | ff                                                                                |
|                            |           |        |        |   | hypothetical protein                                                            |             |                                                                                   |
| fig 6666666.28482.peg.2909 | Contig_29 | 101661 | 101005 | - | ThiJ/Pfpl family protein                                                        | FIG00015923 | idu(8);CBSS-176280.1.peg.1561                                                     |
| fig 6666666.28482.peg.2910 | Contig_29 | 101736 | 102689 | + | Transcriptional regulator, AraC family                                          | FIG00510130 | ff                                                                                |
| fig 6666666.28482.peg.2911 | Contig_29 | 103117 | 102686 | - | Anti-sigma F factor antagonist (spolIIA-2); Anti-sigma B factor antagonist RsbV | FIG00507769 | idu(5);SigmaB_stress_responce_regulation idu(5);Sigma-B_stress_response_cluster_1 |
| fig 6666666.28482.peg.2912 | Contig_29 | 103434 | 104684 | + | Membrane acyltransferase                                                        | FIG01371329 | ff                                                                                |
| fig 6666666.28482.peg.2913 | Contig_29 | 104854 | 105549 | + | Possible membrane protein                                                       | FIG01121868 | ff                                                                                |
| fig 6666666.28482.peg.2914 | Contig_29 | 105710 | 105594 | - | hypothetical protein                                                            |             |                                                                                   |
| fig 6666666.28482.peg.2915 | Contig_29 | 107893 | 105776 | - | O-antigen acetylase                                                             | FIG01370327 | ff                                                                                |
| fig 6666666.28482.peg.2916 | Contig_29 | 108835 | 107945 | - | Possible membrane protein                                                       | FIG01121868 | ff                                                                                |
| fig 6666666.28482.peg.2917 | Contig_29 | 108912 | 110585 | + | Phospholipase C precursor (EC 3.1.4.3)                                          | FIG01339894 | ff                                                                                |
| fig 6666666.28482.peg.2918 | Contig_29 | 110677 | 111822 | + | Alkanesulfonate monooxygenase (EC 1.14.14.5)                                    | FIG00113730 | idu(1);Alkanesulfonates_Utilization idu(1);Alkanesulfonate_assimilation           |
| fig 6666666.28482.peg.2919 | Contig_29 | 111826 | 113166 | + | major facilitator family transporter                                            | FIG01313819 | ff                                                                                |
| fig 6666666.28482.peg.2920 | Contig_29 | 113304 | 114659 | + | Aromatic amino acid transport protein AroP                                      | FIG00116138 | isu;Aromatic_amino_acid_degradation                                               |
| fig 6666666.28482.peg.2921 | Contig_29 | 115047 | 114643 | - | FIG00820204:                                                                    | FIG00820202 | ff                                                                                |
|                            |           |        |        |   | hypothetical protein                                                            |             |                                                                                   |

|                            |           |        |        |   |                                                                 |             |                                                                                                                                       |
|----------------------------|-----------|--------|--------|---|-----------------------------------------------------------------|-------------|---------------------------------------------------------------------------------------------------------------------------------------|
| fig 6666666.28482.peg.2922 | Contig_29 | 115947 | 115072 | - | hypothetical protein                                            | FIG00638284 | ff                                                                                                                                    |
| fig 6666666.28482.peg.2923 | Contig_29 | 115971 | 116312 | + | hypothetical protein                                            |             |                                                                                                                                       |
| fig 6666666.28482.peg.2924 | Contig_29 | 116374 | 117717 | + | Glutamate-1-semialdehyde aminotransferase (EC 5.4.3.8)          | FIG00000338 | icw(1);CBSS-196164.1.peg.461<br>isu;Heme_and_Siroheme_Biosynthesis                                                                    |
| fig 6666666.28482.peg.2925 | Contig_29 | 117717 | 118325 | + | Hypothetical, related to broad specificity phosphatases COG0406 | FIG00004688 | isu;CBSS-196164.1.peg.461                                                                                                             |
| fig 6666666.28482.peg.2926 | Contig_29 | 118328 | 118912 | + | Thiol:disulfide oxidoreductase related to ResA                  | FIG00618007 | icw(1);Biogenesis_of_c-type_cytochromes icw(3);CBSS-196164.1.peg.461                                                                  |
| fig 6666666.28482.peg.2927 | Contig_29 | 118909 | 119688 | + | Cytochrome c-type biogenesis protein CcdA (DsbD analog)         | FIG00133238 | icw(2);Biogenesis_of_c-type_cytochromes<br>isu;Sulfur_oxidation icw(4);CBSS-196164.1.peg.461<br>isu;Periplasmic_disulfide_interchange |
| fig 6666666.28482.peg.2928 | Contig_29 | 119688 | 121370 | + | Ccs1/ResB-related putative cytochrome C-type biogenesis protein | FIG00003692 | icw(3);Biogenesis_of_c-type_cytochromes icw(5);CBSS-196164.1.peg.461                                                                  |
| fig 6666666.28482.peg.2929 | Contig_29 | 121367 | 122353 | + | Cytochrome c-type biogenesis protein CcsA/ResC                  | FIG00001246 | isu;Biogenesis_of_c-type_cytochromes icw(2);CBSS-196164.1.peg.461                                                                     |
| fig 6666666.28482.peg.2930 | Contig_29 | 122398 | 123684 | + | RD1 region associated protein Rv3876                            | FIG00044407 | ff                                                                                                                                    |
| fig 6666666.28482.peg.2931 | Contig_29 | 123846 | 123691 | - | hypothetical protein                                            |             |                                                                                                                                       |
| fig 6666666.28482.peg.2932 | Contig_29 | 123893 | 124237 | + | Possible membrane protein                                       | FIG01121868 | ff                                                                                                                                    |

|                            |           |        |        |   |                                                                                          |             |                                                                                                                                                                                                        |
|----------------------------|-----------|--------|--------|---|------------------------------------------------------------------------------------------|-------------|--------------------------------------------------------------------------------------------------------------------------------------------------------------------------------------------------------|
| fig 6666666.28482.peg.2933 | Contig_29 | 125215 | 124343 | - | 1,4-dihydroxy-2-naphthoate octaprenyltransferase (EC 2.5.1.74)                           | FIG00085608 | isu;Menaquinone_and_Phylloquinone_Biosynthesis_--_gjo<br>isu;Menaquinone_and_Phylloquinone_Biosynthesis                                                                                                |
| fig 6666666.28482.peg.2934 | Contig_29 | 125250 | 126026 | + | 5'-methylthioadenosine phosphorylase (EC 2.4.2.28)                                       | FIG00049258 | isu;Methionine_Salvage                                                                                                                                                                                 |
| fig 6666666.28482.peg.2935 | Contig_29 | 126029 | 127054 | + | UDP-glucose 4-epimerase (EC 5.1.3.2)                                                     | FIG00022300 | idu(4);Rhamnose_containing_glycans<br>idu(4);Lactose_and_Galactose_Uptake_and_Utilization<br>idu(4);N-linked_Glycosylation_in_Bacteria<br>idu(4);Lacto-N-Biose_I_and_Galacto-N-Biose_Metabolic_Pathway |
| fig 6666666.28482.peg.2936 | Contig_3  | 2960   | 135    | - | Glycine dehydrogenase [decarboxylating] (glycine cleavage system P protein) (EC 1.4.4.2) | FIG00000700 | icw(1);Photorespiration_(oxidative_C2_cycle)<br>icw(1);Glycine_cleavage_system                                                                                                                         |
| fig 6666666.28482.peg.2937 | Contig_3  | 3867   | 3238   | - | FIG00820710: hypothetical protein                                                        | FIG00820709 | ff                                                                                                                                                                                                     |
| fig 6666666.28482.peg.2938 | Contig_3  | 4621   | 4127   | - | hypothetical protein                                                                     |             |                                                                                                                                                                                                        |
| fig 6666666.28482.peg.2939 | Contig_3  | 5453   | 4686   | - | Transcriptional regulator, MerR family                                                   | FIG00003460 | idu(1);Cobalt-zinc-cadmium_resistance                                                                                                                                                                  |
| fig 6666666.28482.peg.2940 | Contig_3  | 5936   | 5466   | - | FIG00672531: hypothetical protein                                                        | FIG01121505 | ff                                                                                                                                                                                                     |
| fig 6666666.28482.peg.2941 | Contig_3  | 6601   | 6203   | - | Glycine cleavage system H protein                                                        | FIG00000296 | isu;Photorespiration_(oxidative_C2_cycle)<br>isu;CBSS-315749.4.peg.3658<br>isu;Glycine_cleavage_system                                                                                                 |

|                            |           |       |       |   |                                                                                                  |             |                                                                    |
|----------------------------|-----------|-------|-------|---|--------------------------------------------------------------------------------------------------|-------------|--------------------------------------------------------------------|
| fig 6666666.28482.peg.2942 | Contig_3  | 7343  | 6639  | - | Division initiation protein                                                                      | FIG00008602 | icw(2);CBSS-227882.1.peg.6980                                      |
| fig 6666666.28482.peg.2943 | Contig_3  | 7842  | 7510  | - | FIG025307: hypothetical protein                                                                  | FIG00025307 | isu;CBSS-227882.1.peg.6980                                         |
| fig 6666666.28482.peg.2944 | Contig_3  | 8794  | 7868  | - | FIG030330: hypothetical protein                                                                  | FIG00030330 | icw(1);CBSS-227882.1.peg.6980                                      |
| fig 6666666.28482.peg.2945 | Contig_3  | 9416  | 8787  | - | CDP-diacylglycerol--glycerol-3-phosphate 3-phosphatidyltransferase (EC 2.7.8.5)                  | FIG00001550 | idu(2);Glycerolipid_and_Glycerophospholipid_Metabolism_in_Bacteria |
| fig 6666666.28482.peg.2946 | Contig_3  | 11800 | 9476  | - | Protein export cytoplasm protein SecA ATPase RNA helicase (TC 3.A.5.1.1)                         | FIG00034293 | ff                                                                 |
| fig 6666666.28482.peg.2947 | Contig_3  | 13470 | 11827 | - | COG0028: Thiamine pyrophosphate-requiring enzymes                                                | FIG00452446 | ff                                                                 |
| fig 6666666.28482.peg.2948 | Contig_3  | 13552 | 15471 | + | Drugs-transport transmembrane ATP-binding protein ABC transporter                                | FIG00820139 | ff                                                                 |
| fig 6666666.28482.peg.2949 | Contig_3  | 17051 | 15579 | - | fumarate reductase/succinate dehydrogenase flavoprotein, N-terminal:FAD dependent oxidoreductase | FIG00141996 | idu(1);Succinate_dehydrogenase                                     |
| fig 6666666.28482.peg.2950 | Contig_30 | 4     | 684   | + | L-threonine 3-O-phosphate decarboxylase (EC 4.1.1.81)                                            | FIG00000863 | isu;Cobalamin_synthesis<br>isu;Coenzyme_B12_biosynthesis           |

|                            |           |       |       |   |                                           |             |                                                             |
|----------------------------|-----------|-------|-------|---|-------------------------------------------|-------------|-------------------------------------------------------------|
| fig 6666666.28482.peg.2951 | Contig_30 | 681   | 1850  | + | FIG042796: Hypothetical protein           | FIG01264307 | icw(2);CBSS-100226.1.peg.2266<br>isu;CBSS-349161.4.peg.2417 |
| fig 6666666.28482.peg.2952 | Contig_30 | 1840  | 2577  | + | FIG137478: Hypothetical protein           | FIG01303938 | isu;CBSS-100226.1.peg.2266                                  |
| fig 6666666.28482.peg.2953 | Contig_30 | 2574  | 3689  | + | FIG006762: Phosphoglycerate mutase family | FIG00006762 | icw(1);CBSS-100226.1.peg.2266                               |
| fig 6666666.28482.peg.2954 | Contig_30 | 3699  | 4283  | + | Transcriptional regulator, TetR family    |             |                                                             |
| fig 6666666.28482.peg.2955 | Contig_30 | 5478  | 4270  | - | putative cytochrome P450 hydroxylase      | FIG00032437 | idu(49);Nitric_oxide_synthase                               |
| fig 6666666.28482.peg.2956 | Contig_30 | 7196  | 5475  | - | putative D-aminoacylase                   | FIG01131709 | ff                                                          |
| fig 6666666.28482.peg.2957 | Contig_30 | 8398  | 7208  | - | Amidohydrolase 2                          |             |                                                             |
| fig 6666666.28482.peg.2958 | Contig_30 | 8861  | 8466  | - | FIG00821467: hypothetical protein         | FIG00821466 | ff                                                          |
| fig 6666666.28482.peg.2959 | Contig_30 | 9121  | 8858  | - | FIG034581: hypothetical protein           |             | ff                                                          |
| fig 6666666.28482.peg.2960 | Contig_30 | 9205  | 12393 | + | Adenylate cyclase (EC 4.6.1.1)            | FIG00001294 | idu(25);cAMP_signaling_in_bacteria                          |
| fig 6666666.28482.peg.2961 | Contig_30 | 12431 | 12679 | + | hypothetical protein                      |             |                                                             |
| fig 6666666.28482.peg.2962 | Contig_30 | 13415 | 12723 | - | PE_PGRS family protein                    |             |                                                             |
| fig 6666666.28482.peg.2963 | Contig_30 | 14753 | 13515 | - | putative cytochrome P450 hydroxylase      | FIG00032437 | idu(49);Nitric_oxide_synthase                               |
| fig 6666666.28482.peg.2964 | Contig_30 | 14925 | 19526 | + | ABC-1 domain protein                      |             |                                                             |
| fig 6666666.28482.peg.2965 | Contig_30 | 19513 | 22734 | + | Adenylate cyclase (EC 4.6.1.1)            | FIG00001294 | idu(25);cAMP_signaling_in_bacteria                          |
| fig 6666666.28482.peg.2966 | Contig_30 | 22758 | 22958 | + | hypothetical protein                      | FIG00638284 | ff                                                          |
| fig 6666666.28482.peg.2967 | Contig_30 | 24495 | 22960 | - | probable sulfite oxidase                  | FIG00815108 | ff                                                          |
| fig 6666666.28482.peg.2968 | Contig_30 | 24648 | 24505 | - | hypothetical protein                      |             |                                                             |

|                            |           |       |       |   |                                                                |             |                                                                                                                                                                            |
|----------------------------|-----------|-------|-------|---|----------------------------------------------------------------|-------------|----------------------------------------------------------------------------------------------------------------------------------------------------------------------------|
| fig 6666666.28482.peg.2969 | Contig_30 | 24825 | 28295 | + | High-affnity carbon uptake protein Hat/HatR                    | FIG00451198 | isu;CO2_uptake,_carboxysome                                                                                                                                                |
| fig 6666666.28482.peg.2970 | Contig_30 | 29776 | 28292 | - | Aldehyde dehydrogenase (EC 1.2.1.3)                            | FIG01292786 | idu(16);Pyruvate_metabolism_II:_acetyl-CoA,_acetogenesis_from_pyruvate icw(1);Glycerolipid_and_Glycerophospholipid_Metabolism_in_Bacteria idu(16);Methylglyoxal_Metabolism |
| fig 6666666.28482.peg.2971 | Contig_30 | 29864 | 30934 | + | Alcohol dehydrogenase (EC 1.1.1.1)                             | FIG01007502 | idu(17);Glycerolipid_and_Glycerophospholipid_Metabolism_in_Bacteria idu(17);Fermentations:_Mixed_acid idu(17);Butanol_Biosynthesis                                         |
| fig 6666666.28482.peg.2972 | Contig_30 | 31132 | 30938 | - | hypothetical protein                                           | FIG01841460 | ff                                                                                                                                                                         |
| fig 6666666.28482.peg.2973 | Contig_30 | 32538 | 31129 | - | FIG00822502: hypothetical protein                              | FIG00822499 | ff                                                                                                                                                                         |
| fig 6666666.28482.peg.2974 | Contig_30 | 34328 | 32826 | - | Chaperonin GroEL (HSP60 family)                                | FIG01358020 | ff                                                                                                                                                                         |
| fig 6666666.28482.peg.2975 | Contig_30 | 35593 | 34385 | - | hypothetical protein                                           |             |                                                                                                                                                                            |
| fig 6666666.28482.peg.2976 | Contig_30 | 36575 | 35727 | - | 3-methyl-2-oxobutanoate hydroxymethyltransferase (EC 2.1.2.11) | FIG00000364 | isu;Coenzyme_A_Biosynthesis_cluster isu;Coenzyme_A_Biosynthesis                                                                                                            |
| fig 6666666.28482.peg.2977 | Contig_30 | 36704 | 38086 | + | Wax ester synthase/acyl-CoA:diacylglycerol acyltransferase     | FIG01309728 | ff                                                                                                                                                                         |
| fig 6666666.28482.peg.2978 | Contig_30 | 38144 | 39700 | + | Probable exported protease [EC:3.4.-.-]                        | FIG01357694 | ff                                                                                                                                                                         |

|                            |           |       |       |   |                                                         |             |                                              |
|----------------------------|-----------|-------|-------|---|---------------------------------------------------------|-------------|----------------------------------------------|
| fig 6666666.28482.peg.2979 | Contig_30 | 39872 | 41485 | + | Putative hydrolase                                      | FIG01331319 | ff                                           |
| fig 6666666.28482.peg.2980 | Contig_31 | 4013  | 888   | - | ATP-dependent DNA<br>helicase SCO5183                   | FIG00030006 | isu;DNA_repair,_bacterial_RecBCD_p<br>athway |
| fig 6666666.28482.peg.2981 | Contig_31 | 4090  | 4287  | + | FIG00823358:<br>hypothetical protein                    | FIG00823348 | ff                                           |
| fig 6666666.28482.peg.2982 | Contig_31 | 4284  | 5081  | + | possible lipase                                         | FIG00994937 | ff                                           |
| fig 6666666.28482.peg.2983 | Contig_31 | 5084  | 5392  | + | Methylated DNA-protein<br>cysteine<br>methyltransferase | FIG00820289 | ff                                           |
| fig 6666666.28482.peg.2984 | Contig_31 | 6373  | 5519  | - | FIG00994019:<br>hypothetical protein                    | FIG00820742 | ff                                           |
| fig 6666666.28482.peg.2985 | Contig_31 | 7591  | 6410  | - | Sulfur carrier protein<br>adenylyltransferase ThiF      | FIG00001002 | isu;Thiamin_biosynthesis                     |
| fig 6666666.28482.peg.2986 | Contig_31 | 8755  | 7748  | - | FIG00820929:<br>hypothetical protein                    | FIG00820928 | ff                                           |
| fig 6666666.28482.peg.2987 | Contig_31 | 8945  | 9631  | + | Transcriptional regulator,<br>TetR family               | FIG00554417 | ff                                           |
| fig 6666666.28482.peg.2988 | Contig_31 | 9890  | 9618  | - | putative ATP-binding<br>protein                         | FIG00945249 | ff                                           |
| fig 6666666.28482.peg.2989 | Contig_31 | 10110 | 10805 | + | putative membrane<br>protein                            | FIG00672847 | ff                                           |
| fig 6666666.28482.peg.2990 | Contig_31 | 11526 | 10807 | - | FIG00821439:<br>hypothetical protein                    | FIG00821438 | ff                                           |
| fig 6666666.28482.peg.2991 | Contig_31 | 11774 | 13291 | + | putative ATP-dependent<br>RNA helicase                  | FIG01121467 | ff                                           |

|                            |           |       |       |   |                                                                                               |             |                                                                                                                                                                                                                                                                                        |
|----------------------------|-----------|-------|-------|---|-----------------------------------------------------------------------------------------------|-------------|----------------------------------------------------------------------------------------------------------------------------------------------------------------------------------------------------------------------------------------------------------------------------------------|
| fig 6666666.28482.peg.2992 | Contig_31 | 13307 | 14521 | + | Cell division protein DivIC (FtsB), stabilizes FtsL against RasP cleavage                     | FIG00485194 | idu(10);Possible_new_toxin-antitoxin_system_including_DivIC<br>icw(1);Bacterial_Cell_Division<br>idu(10);Cell_division-ribosomal_stress_proteins_cluster<br>idu(10);Bacterial_Cytoskeleton<br>idu(10);Stationary_phase_repair_cluster                                                  |
| fig 6666666.28482.peg.2993 | Contig_31 | 15415 | 14615 | - | Chromosome (plasmid) partitioning protein ParA / Sporulation initiation inhibitor protein Soj | FIG00006461 | idu(2);RNA_modification_and_chromosome_partitioning_cluster<br>idu(2);Bacterial_Cell_Division<br>idu(2);Ribosome_post-transcriptional_modification_and_chromosomal_segregation_cluster<br>icw(1);Bacterial_Cytoskeleton<br>icw(1);Bacterial_Cytoskeleton<br>idu(2);Plasmid_replication |
| fig 6666666.28482.peg.2994 | Contig_31 | 15613 | 16224 | + | putative phosphoglycerate mutase family protein                                               | FIG01308292 | ff                                                                                                                                                                                                                                                                                     |
| fig 6666666.28482.peg.2995 | Contig_31 | 16221 | 17318 | + | Isochorismate synthase (EC 5.4.4.2)                                                           | FIG01304982 | isu;Chorismate:_Intermediate_for_synthesis_of_Tryptophan,_PAPA_antibiotics,_PABA,_3-hydroxyanthranilate_and_more.                                                                                                                                                                      |
| fig 6666666.28482.peg.2996 | Contig_31 | 17315 | 17797 | + | Diamine acetyltransferase (EC 2.3.1.57)                                                       | FIG01342327 | ff                                                                                                                                                                                                                                                                                     |
| fig 6666666.28482.peg.2997 | Contig_31 | 18180 | 17749 | - | PROBABLE CONSERVED INTEGRAL MEMBRANE PROTEIN                                                  |             |                                                                                                                                                                                                                                                                                        |

|                            |           |       |       |   |                                                                                 |             |                                                                                                               |
|----------------------------|-----------|-------|-------|---|---------------------------------------------------------------------------------|-------------|---------------------------------------------------------------------------------------------------------------|
| fig 6666666.28482.peg.2998 | Contig_31 | 18259 | 19215 | + | Transcription regulator<br>[contains diacylglycerol<br>kinase catalytic domain] | FIG00001646 | ff                                                                                                            |
| fig 6666666.28482.peg.2999 | Contig_31 | 19485 | 19739 | + | WhiB-like transcription<br>regulator                                            | FIG00018409 | isu;WhiB_and_WhiB-<br>type_regulatory_proteins_                                                               |
| fig 6666666.28482.peg.3000 | Contig_31 | 21308 | 19803 | - | Signal transduction<br>histidine kinase,<br>subgroup 2                          |             |                                                                                                               |
| fig 6666666.28482.peg.3001 | Contig_31 | 21579 | 21358 | - | Biotin carboxyl carrier<br>protein                                              | FIG00005415 | idu(1);Urea_carboxylase_and_Alloph<br>anate_hydrolase_cluster<br>idu(1);Fatty_Acid_Biosynthesis_FASII         |
| fig 6666666.28482.peg.3002 | Contig_31 | 22125 | 21823 | - | Anti-sigma factor                                                               | FIG00997799 | ff                                                                                                            |
| fig 6666666.28482.peg.3003 | Contig_31 | 22817 | 22122 | - | RNA polymerase sigma-<br>54 factor RpoN                                         | FIG00006092 | idu(2);Flagellar_motility<br>idu(2);Flagellum<br>idu(2);Transcription_initiation,_bacte<br>rial_sigma_factors |
| fig 6666666.28482.peg.3004 | Contig_31 | 23065 | 23913 | + | Short-chain<br>dehydrogenase/reductas<br>e SDR                                  | FIG00546160 | idu(13);CBSS-164757.7.peg.5020<br>idu(13);Transcription_repair_cluster                                        |
| fig 6666666.28482.peg.3005 | Contig_31 | 23916 | 24455 | + | Cys-tRNA(Pro) deacylase<br>YbaK                                                 | FIG00003050 | ff                                                                                                            |
| fig 6666666.28482.peg.3006 | Contig_31 | 25370 | 24549 | - | Poly(3-hydroxyalkanoate)<br>depolymerase                                        | FIG01304243 | icw(1);Polyhydroxybutyrate_metaboli<br>sm                                                                     |
| fig 6666666.28482.peg.3007 | Contig_31 | 27095 | 25404 | - | Polyhydroxyalkanoic acid<br>synthase                                            | FIG00000970 | idu(1);Polyhydroxybutyrate_metaboli<br>sm                                                                     |

|                            |           |       |       |   |                                                    |             |                                                                                                                                                                                                                                |
|----------------------------|-----------|-------|-------|---|----------------------------------------------------|-------------|--------------------------------------------------------------------------------------------------------------------------------------------------------------------------------------------------------------------------------|
| fig 6666666.28482.peg.3008 | Contig_31 | 28609 | 27098 | - | Long-chain-fatty-acid--<br>CoA ligase (EC 6.2.1.3) | FIG00018699 | idu(72);n-<br>Phenylalkanoic_acid_degradation<br>idu(72);Fatty_acid_metabolism_clust<br>er idu(72);Biotin_synthesis_cluster<br>idu(72);Biotin_biosynthesis                                                                     |
| fig 6666666.28482.peg.3009 | Contig_31 | 28752 | 29975 | + | hypothetical protein                               | FIG00638284 | ff                                                                                                                                                                                                                             |
| fig 6666666.28482.peg.3010 | Contig_31 | 30553 | 29972 | - | Probable conserved<br>membrane protein             |             |                                                                                                                                                                                                                                |
| fig 6666666.28482.peg.3011 | Contig_31 | 30814 | 31008 | + | hypothetical protein                               |             |                                                                                                                                                                                                                                |
| fig 6666666.28482.peg.3012 | Contig_31 | 32322 | 31012 | - | FIG00828711:<br>hypothetical protein               | FIG00828709 | ff                                                                                                                                                                                                                             |
| fig 6666666.28482.peg.3013 | Contig_31 | 32461 | 34269 | + | CONSERVED MEMBRANE<br>PROTEIN                      | FIG00818075 | ff                                                                                                                                                                                                                             |
| fig 6666666.28482.peg.3014 | Contig_31 | 34266 | 35687 | + | Phytoene dehydrogenase<br>and related proteins     | FIG00139162 | ff                                                                                                                                                                                                                             |
| fig 6666666.28482.peg.3015 | Contig_31 | 35827 | 36993 | + | Butyryl-CoA<br>dehydrogenase (EC<br>1.3.99.2)      | FIG00009149 | idu(39);Isoleucine_degradation<br>idu(39);Lysine_fermentation<br>idu(39);Butanol_Biosynthesis<br>idu(39);Acetyl-<br>CoA_fermentation_to_Butyrate<br>idu(39);Valine_degradation<br>idu(39);Anaerobic_respiratory_reduc<br>tases |
| fig 6666666.28482.peg.3016 | Contig_31 | 37083 | 37334 | + | FIG00830431:<br>hypothetical protein               | FIG00830430 | ff                                                                                                                                                                                                                             |
| fig 6666666.28482.peg.3017 | Contig_31 | 37376 | 37927 | + | hypothetical protein                               | FIG00638284 | ff                                                                                                                                                                                                                             |

|                            |           |       |       |   |                                                                                                  |             |                                                                                                                                                                                                                                                                                                                                                                                                   |
|----------------------------|-----------|-------|-------|---|--------------------------------------------------------------------------------------------------|-------------|---------------------------------------------------------------------------------------------------------------------------------------------------------------------------------------------------------------------------------------------------------------------------------------------------------------------------------------------------------------------------------------------------|
| fig 6666666.28482.peg.3018 | Contig_31 | 38762 | 37893 | - | 3-hydroxybutyryl-CoA dehydrogenase (EC 1.1.1.157); 3-hydroxyacyl-CoA dehydrogenase (EC 1.1.1.35) | FIG00000819 | idu(4);n-Phenylalkanoic_acid_degradation idu(4);Polyhydroxybutyrate_metabolism idu(2);Polyhydroxybutyrate_metabolism icw(1);Isoleucine_degradation idu(4);Fatty_acid_metabolism_cluster icw(1);Lysine_fermentation icw(1);Butanol_Biosynthesis icw(1);Acetyl-CoA_fermentation_to_Butyrate icw(1);Acetyl-CoA_fermentation_to_Butyrate icw(1);Valine_degradation idu(4);Butyrate_metabolism_cluster |
| fig 6666666.28482.peg.3019 | Contig_31 | 40250 | 38853 | - | PE family protein                                                                                |             |                                                                                                                                                                                                                                                                                                                                                                                                   |
| fig 6666666.28482.peg.3020 | Contig_31 | 41048 | 40305 | - | FIG00996837: hypothetical protein                                                                | FIG00996836 | ff                                                                                                                                                                                                                                                                                                                                                                                                |
| fig 6666666.28482.peg.3021 | Contig_31 | 41125 | 42411 | + | 5-Enolpyruvylshikimate-3-phosphate synthase (EC 2.5.1.19)                                        | FIG00075970 | isu;Chorismate_Synthesis isu;Common_Pathway_For_Synthesis_of_Aromatic_Compounds_(DAHP_synthase_to_chorismate)                                                                                                                                                                                                                                                                                     |
| fig 6666666.28482.peg.3022 | Contig_31 | 42408 | 43388 | + | Ribosome small subunit-stimulated GTPase EngC                                                    | FIG00000464 | ff                                                                                                                                                                                                                                                                                                                                                                                                |
| fig 6666666.28482.peg.3023 | Contig_31 | 43941 | 43468 | - | Transcriptional regulator, HxIR family                                                           | FIG00906075 | ff                                                                                                                                                                                                                                                                                                                                                                                                |

|                            |           |       |       |   |                                                                                   |             |                                                                                                                                                                                                                                                                                                                                                                                                                                                                                                                                                                                                                                |
|----------------------------|-----------|-------|-------|---|-----------------------------------------------------------------------------------|-------------|--------------------------------------------------------------------------------------------------------------------------------------------------------------------------------------------------------------------------------------------------------------------------------------------------------------------------------------------------------------------------------------------------------------------------------------------------------------------------------------------------------------------------------------------------------------------------------------------------------------------------------|
| fig 6666666.28482.peg.3024 | Contig_31 | 44038 | 45219 | + | 3-ketoacyl-CoA thiolase (EC 2.3.1.16) @ Acetyl-CoA acetyltransferase (EC 2.3.1.9) | FIG00000004 | idu(11);CBSS-246196.1.peg.364<br>idu(9);Serine-glyoxylate_cycle<br>idu(11);Serine-glyoxylate_cycle<br>idu(11);n-Phenylalkanoic_acid_degradation<br>idu(9);Ethylmalonyl-CoA_pathway_of_C2_assimilation,_GJO<br>idu(9);Polyhydroxybutyrate_metabolism<br>idu(11);Polyhydroxybutyrate_metabolism<br>idu(11);Isoleucine_degradation<br>idu(11);Fatty_acid_metabolism_cluster<br>idu(11);Biotin_synthesis_cluster<br>idu(11);Biotin_biosynthesis<br>idu(9);Lysine_fermentation<br>idu(9);Isoprenoid_Biosynthesis<br>idu(9);Butanol_Biosynthesis<br>idu(9);Acetyl-CoA_fermentation_to_Butyrate<br>idu(9);Butyrate_metabolism_cluster |
| fig 6666666.28482.peg.3025 | Contig_31 | 45228 | 46121 | + | hypothetical protein                                                              |             |                                                                                                                                                                                                                                                                                                                                                                                                                                                                                                                                                                                                                                |
| fig 6666666.28482.peg.3026 | Contig_31 | 46114 | 46614 | + | FIG00824368:<br>hypothetical protein                                              | FIG00824365 | ff                                                                                                                                                                                                                                                                                                                                                                                                                                                                                                                                                                                                                             |
| fig 6666666.28482.peg.3027 | Contig_31 | 47610 | 46639 | - | Nitrilase/cyanide hydratase and apolipoprotein N-acyltransferase                  | FIG01355120 | ff                                                                                                                                                                                                                                                                                                                                                                                                                                                                                                                                                                                                                             |
| fig 6666666.28482.peg.3028 | Contig_31 | 47868 | 48395 | + | hypothetical protein                                                              |             |                                                                                                                                                                                                                                                                                                                                                                                                                                                                                                                                                                                                                                |

|                            |           |       |       |   |                                                              |             |                                         |
|----------------------------|-----------|-------|-------|---|--------------------------------------------------------------|-------------|-----------------------------------------|
| fig 6666666.28482.peg.3029 | Contig_31 | 49526 | 48429 | - | Carboxylesterase, type B                                     | FIG01336027 | ff                                      |
| fig 6666666.28482.peg.3030 | Contig_31 | 49968 | 50468 | + | hypothetical protein                                         | FIG00638284 | ff                                      |
| fig 6666666.28482.peg.3031 | Contig_31 | 50917 | 50516 | - | putative transmembrane protein                               |             |                                         |
| fig 6666666.28482.peg.3032 | Contig_31 | 52145 | 51759 | - | hypothetical protein                                         |             |                                         |
| fig 6666666.28482.peg.3033 | Contig_31 | 52526 | 52194 | - | protein of unknown function DUF732                           |             |                                         |
| fig 6666666.28482.peg.3034 | Contig_31 | 53134 | 52598 | - | hypothetical protein                                         | FIG00638284 | ff                                      |
| fig 6666666.28482.peg.3035 | Contig_31 | 54457 | 53177 | - | POSSIBLE LINOLEOYL-CoA DESATURASE (DELTA(6)-DESATURASE)      | FIG00539310 | ff                                      |
| fig 6666666.28482.peg.3036 | Contig_31 | 55735 | 54545 | - | Flavodoxin reductases (ferredoxin-NADPH reductases) family 1 | FIG01954108 | idu(3);Anaerobic_respiratory_reductases |
| fig 6666666.28482.peg.3037 | Contig_31 | 56334 | 55822 | - | FIG00996471: hypothetical protein                            | FIG00820145 | ff                                      |
| fig 6666666.28482.peg.3038 | Contig_31 | 57200 | 56334 | - | UDP-galactose-lipid carrier transferase (EC 2.-.-.)          | FIG01236906 | ff                                      |
| fig 6666666.28482.peg.3039 | Contig_31 | 58663 | 57245 | - | Wax ester synthase/acyl-CoA:diacylglycerol acyltransferase   | FIG01309728 | ff                                      |
| fig 6666666.28482.peg.3040 | Contig_31 | 58991 | 59332 | + | FIG00830285: hypothetical protein                            | FIG00830283 | ff                                      |
| fig 6666666.28482.peg.3041 | Contig_31 | 60479 | 59340 | - | Kef-type K <sup>+</sup> transport system, membrane component | FIG01956314 | ff                                      |
| fig 6666666.28482.peg.3042 | Contig_31 | 60966 | 60484 | - | TrkA, Potassium channel                                      | FIG01334851 | ff                                      |

|                            |           |       |       |   |                                                                                                                                                  |             |                                                                   |
|----------------------------|-----------|-------|-------|---|--------------------------------------------------------------------------------------------------------------------------------------------------|-------------|-------------------------------------------------------------------|
| fig 6666666.28482.peg.3043 | Contig_31 | 62949 | 61009 | - | Kup system potassium uptake protein                                                                                                              | FIG00000843 | isu;Potassium_homeostasis                                         |
| fig 6666666.28482.peg.3044 | Contig_31 | 63471 | 62998 | - | GtrA family protein                                                                                                                              |             |                                                                   |
| fig 6666666.28482.peg.3045 | Contig_31 | 63555 | 64019 | + | hypothetical protein                                                                                                                             |             |                                                                   |
| fig 6666666.28482.peg.3046 | Contig_31 | 64780 | 64016 | - | hypothetical protein                                                                                                                             | FIG00638284 | ff                                                                |
| fig 6666666.28482.peg.3047 | Contig_31 | 64976 | 66712 | + | FIG00996672: hypothetical protein                                                                                                                | FIG00996670 | ff                                                                |
| fig 6666666.28482.peg.3048 | Contig_31 | 67529 | 66735 | - | Adenylate cyclase (EC 4.6.1.1)                                                                                                                   | FIG00001294 | idu(25);cAMP_signaling_in_bacteria                                |
| fig 6666666.28482.peg.3049 | Contig_31 | 69155 | 67605 | - | transcriptional regulator, LuxR family protein                                                                                                   | FIG01428339 | ff                                                                |
| fig 6666666.28482.peg.3050 | Contig_31 | 72167 | 69318 | - | Protein export cytoplasm protein SecA ATPase RNA helicase (TC 3.A.5.1.1)                                                                         | FIG00034293 | ff                                                                |
| fig 6666666.28482.peg.3051 | Contig_31 | 72971 | 72264 | - | Ribosomal subunit interface protein                                                                                                              | FIG00001306 | isu;Ribosome_activity_modulation                                  |
| fig 6666666.28482.peg.3052 | Contig_31 | 73928 | 73287 | - | Competence protein F homolog, phosphoribosyltransferase domain; protein YhgH required for utilization of DNA as sole source of carbon and energy | FIG00004440 | isu;Biotin_biosynthesis_Experimental<br>isu;CBSS-216591.1.peg.168 |
| fig 6666666.28482.peg.3053 | Contig_31 | 75269 | 73974 | - | FIG00467522: hypothetical protein                                                                                                                | FIG00467521 | ff                                                                |
| fig 6666666.28482.peg.3054 | Contig_31 | 75310 | 75429 | + | hypothetical protein                                                                                                                             |             |                                                                   |
| fig 6666666.28482.peg.3055 | Contig_31 | 77544 | 75787 | - | LpqB                                                                                                                                             | FIG00863150 | ff                                                                |
| fig 6666666.28482.peg.3056 | Contig_31 | 79124 | 77544 | - | Sensor histidine kinase MtrB (EC 2.7.3.-)                                                                                                        | FIG00868343 | ff                                                                |

|                            |           |       |       |   |                                            |             |                                                             |
|----------------------------|-----------|-------|-------|---|--------------------------------------------|-------------|-------------------------------------------------------------|
| fig 6666666.28482.peg.3057 | Contig_31 | 79911 | 79225 | - | DNA-binding response regulator mtrA        | FIG00545527 | ff                                                          |
| fig 6666666.28482.peg.3058 | Contig_31 | 80624 | 79992 | - | Thymidylate kinase (EC 2.7.4.9)            | FIG00000175 | idu(1);pyrimidine_conversions idu(1);CBSS-393133.3.peg.2787 |
| fig 6666666.28482.peg.3059 | Contig_31 | 82188 | 80716 | - | Adenosylhomocysteinase (EC 3.3.1.1)        | FIG00000858 | ff                                                          |
| fig 6666666.28482.peg.3060 | Contig_31 | 82894 | 82247 | - | Transcriptional regulator, TetR family     | FIG00554417 | ff                                                          |
| fig 6666666.28482.peg.3061 | Contig_31 | 83103 | 82921 | - | Rubredoxin                                 | FIG01955902 | icw(1);Rubrerythrin                                         |
| fig 6666666.28482.peg.3062 | Contig_31 | 83273 | 83100 | - | Rubredoxin                                 | FIG01955902 | icw(1);Rubrerythrin                                         |
| fig 6666666.28482.peg.3063 | Contig_31 | 84493 | 83270 | - | Alkane-1 monooxygenase (EC 1.14.15.3)      | FIG01363988 | ff                                                          |
| fig 6666666.28482.peg.3064 | Contig_31 | 86176 | 84668 | - | Amino acid permease                        | FIG01345058 | ff                                                          |
| fig 6666666.28482.peg.3065 | Contig_31 | 86270 | 87649 | + | putative secreted protein                  | FIG00905474 | ff                                                          |
| fig 6666666.28482.peg.3066 | Contig_31 | 88853 | 87627 | - | Mannose-6-phosphate isomerase (EC 5.3.1.8) | FIG00598409 | isu;Mannose_Metabolism                                      |
| fig 6666666.28482.peg.3067 | Contig_31 | 89401 | 88862 | - | FIG00692620: hypothetical protein          | FIG00692617 | ff                                                          |
| fig 6666666.28482.peg.3068 | Contig_32 | 1509  | 16    | - | FIG00826601: hypothetical protein          | FIG00826600 | ff                                                          |
| fig 6666666.28482.peg.3069 | Contig_32 | 1878  | 3209  | + | metabolite-proton symporter                | FIG00994071 | ff                                                          |

|                            |           |       |       |   |                                                                 |             |                                                                                                                                                                                                                                                                                                             |
|----------------------------|-----------|-------|-------|---|-----------------------------------------------------------------|-------------|-------------------------------------------------------------------------------------------------------------------------------------------------------------------------------------------------------------------------------------------------------------------------------------------------------------|
| fig 6666666.28482.peg.3070 | Contig_32 | 3435  | 4661  | + | 3-ketoacyl-CoA thiolase<br>(EC 2.3.1.16)                        | FIG01279374 | idu(11);CBSS-246196.1.peg.364<br>idu(11);Serine-glyoxylate_cycle<br>idu(11);n-<br>Phenylalkanoic_acid_degradation<br>idu(11);Polyhydroxybutyrate_metabo<br>lism idu(11);Isoleucine_degradation<br>idu(11);Fatty_acid_metabolism_clust<br>er idu(11);Biotin_synthesis_cluster<br>idu(11);Biotin_biosynthesis |
| fig 6666666.28482.peg.3071 | Contig_32 | 4664  | 6178  | + | Lignostilbene-alpha,beta-<br>dioxygenase and related<br>enzymes | FIG01358959 | ff                                                                                                                                                                                                                                                                                                          |
| fig 6666666.28482.peg.3072 | Contig_32 | 6175  | 6663  | + | FIG00826613:<br>hypothetical protein                            | FIG00826612 | ff                                                                                                                                                                                                                                                                                                          |
| fig 6666666.28482.peg.3073 | Contig_32 | 7092  | 6667  | - | PROBABLE CONSERVED<br>TRANSMEMBRANE<br>PROTEIN                  | FIG00662132 | ff                                                                                                                                                                                                                                                                                                          |
| fig 6666666.28482.peg.3074 | Contig_32 | 7960  | 7142  | - | putative hydroxylase                                            | FIG01122344 | ff                                                                                                                                                                                                                                                                                                          |
| fig 6666666.28482.peg.3075 | Contig_32 | 8476  | 8003  | - | FIG00820677:<br>hypothetical protein                            | FIG00820675 | ff                                                                                                                                                                                                                                                                                                          |
| fig 6666666.28482.peg.3076 | Contig_32 | 8667  | 8482  | - | FIG00821394:<br>hypothetical protein                            | FIG00821392 | ff                                                                                                                                                                                                                                                                                                          |
| fig 6666666.28482.peg.3077 | Contig_32 | 11090 | 8703  | - | Cation-transporting<br>ATPase, E1-E2 family                     | FIG01322067 | ff                                                                                                                                                                                                                                                                                                          |
| fig 6666666.28482.peg.3078 | Contig_32 | 12676 | 11087 | - | Beta-lactamase (EC<br>3.5.2.6)                                  | FIG00000747 | idu(1);Beta-lactamase idu(1);Tn552                                                                                                                                                                                                                                                                          |
| fig 6666666.28482.peg.3079 | Contig_32 | 12982 | 13506 | + | unknown                                                         |             |                                                                                                                                                                                                                                                                                                             |

|                            |           |       |       |   |                                                                                                                                  |             |                                                                                                                                                                                                                                                                                                                           |
|----------------------------|-----------|-------|-------|---|----------------------------------------------------------------------------------------------------------------------------------|-------------|---------------------------------------------------------------------------------------------------------------------------------------------------------------------------------------------------------------------------------------------------------------------------------------------------------------------------|
| fig 6666666.28482.peg.3080 | Contig_32 | 14629 | 13511 | - | Outer membrane protein romA                                                                                                      | FIG01371060 | ff                                                                                                                                                                                                                                                                                                                        |
| fig 6666666.28482.peg.3081 | Contig_32 | 15369 | 14635 | - | Enoyl-CoA hydratase (EC 4.2.1.17)                                                                                                | FIG00033206 | idu(51);n-Phenylalkanoic_acid_degradation idu(51);Polyhydroxybutyrate_metabolism idu(51);Isoleucine_degradation idu(51);Fatty_acid_metabolism_cluster idu(51);Lysine_fermentation idu(51);Butanol_Biosynthesis idu(51);Acetyl-CoA_fermentation_to_Butyrate idu(51);Valine_degradation idu(51);Butyrate_metabolism_cluster |
| fig 6666666.28482.peg.3082 | Contig_32 | 15432 | 16892 | + | Acetyl-coenzyme A carboxyl transferase alpha chain (EC 6.4.1.2) / Acetyl-coenzyme A carboxyl transferase beta chain (EC 6.4.1.2) | FIG01303802 | isu;Fatty_Acid_Biosynthesis_FASII isu;Fatty_Acid_Biosynthesis_FASII                                                                                                                                                                                                                                                       |
| fig 6666666.28482.peg.3083 | Contig_32 | 17499 | 16930 | - | Transcriptional regulator, TetR family                                                                                           | FIG00554417 | ff                                                                                                                                                                                                                                                                                                                        |
| fig 6666666.28482.peg.3084 | Contig_32 | 17602 | 18741 | + | pentachlorophenol 4-monooxygenase                                                                                                |             |                                                                                                                                                                                                                                                                                                                           |
| fig 6666666.28482.peg.3085 | Contig_32 | 18800 | 19510 | + | DNA-binding response regulator                                                                                                   | FIG01031438 | ff                                                                                                                                                                                                                                                                                                                        |
| fig 6666666.28482.peg.3086 | Contig_32 | 19588 | 20877 | + | Sensor-type histidine kinase prrB (EC 2.7.13.3)                                                                                  | FIG01405604 | ff                                                                                                                                                                                                                                                                                                                        |

|                            |           |       |       |   |                                                       |             |                                                                                                                                                            |
|----------------------------|-----------|-------|-------|---|-------------------------------------------------------|-------------|------------------------------------------------------------------------------------------------------------------------------------------------------------|
| fig 6666666.28482.peg.3087 | Contig_32 | 22158 | 20887 | - | POSSIBLE CONSERVED<br>EXPORTED OR<br>MEMBRANE PROTEIN | FIG01334926 | ff                                                                                                                                                         |
| fig 6666666.28482.peg.3088 | Contig_32 | 22304 | 22155 | - | hypothetical protein                                  |             |                                                                                                                                                            |
| fig 6666666.28482.peg.3089 | Contig_32 | 23296 | 22316 | - | Outer membrane protein                                | FIG01111221 | ff                                                                                                                                                         |
| fig 6666666.28482.peg.3090 | Contig_32 | 23404 | 23667 | + | FIG00821893:<br>hypothetical protein                  | FIG00821892 | ff                                                                                                                                                         |
| fig 6666666.28482.peg.3091 | Contig_32 | 23670 | 25253 | + | Beta-carotene ketolase<br>(EC 1.14.-.-)               | FIG00071345 | idu(3);Proteorhodopsin                                                                                                                                     |
| fig 6666666.28482.peg.3092 | Contig_32 | 26590 | 25295 | - | Citrate synthase (si) (EC<br>2.3.3.1)                 | FIG00130344 | icw(1);Serine-glyoxylate_cycle<br>icw(1);TCA_Cycle<br>icw(1);Glyoxylate_bypass                                                                             |
| fig 6666666.28482.peg.3093 | Contig_32 | 27394 | 26768 | - | Pyridoxamine 5'-<br>phosphate oxidase (EC<br>1.4.3.5) | FIG00133002 | isu;Pyridoxin_(Vitamin_B6)_Biosynth<br>esis                                                                                                                |
| fig 6666666.28482.peg.3094 | Contig_32 | 27545 | 28621 | + | Citrate synthase (si) (EC<br>2.3.3.1)                 | FIG00130344 | icw(1);Serine-glyoxylate_cycle<br>icw(1);TCA_Cycle<br>icw(1);Glyoxylate_bypass                                                                             |
| fig 6666666.28482.peg.3095 | Contig_33 | 14    | 1762  | + | Long-chain-fatty-acid--<br>CoA ligase (EC 6.2.1.3)    | FIG00018699 | idu(72);n-<br>Phenylalkanoic_acid_degradation<br>idu(72);Fatty_acid_metabolism_clust<br>er idu(72);Biotin_synthesis_cluster<br>idu(72);Biotin_biosynthesis |
| fig 6666666.28482.peg.3096 | Contig_33 | 1785  | 2453  | + | FIG00830296:<br>hypothetical protein                  | FIG00830295 | ff                                                                                                                                                         |
| fig 6666666.28482.peg.3097 | Contig_33 | 2480  | 3247  | + | Putative uncharacterized<br>protein BCG_1966          | FIG01319018 | ff                                                                                                                                                         |

|                            |           |       |       |   |                                                                         |             |                                                                  |
|----------------------------|-----------|-------|-------|---|-------------------------------------------------------------------------|-------------|------------------------------------------------------------------|
| fig 6666666.28482.peg.3098 | Contig_33 | 4028  | 3267  | - | Probable short-chain<br>type<br>dehydrogenase/reductas<br>e (EC 1.-.-.) | FIG00026991 | idu(2);CBSS-164757.7.peg.5020                                    |
| fig 6666666.28482.peg.3099 | Contig_33 | 4092  | 4568  | + | FIG00825523:<br>hypothetical protein                                    | FIG00825522 | ff                                                               |
| fig 6666666.28482.peg.3100 | Contig_33 | 4657  | 5142  | + | hypothetical protein                                                    |             |                                                                  |
| fig 6666666.28482.peg.3101 | Contig_33 | 5891  | 5139  | - | ThiJ/Pfpl family protein                                                | FIG00015923 | idu(8);CBSS-176280.1.peg.1561                                    |
| fig 6666666.28482.peg.3102 | Contig_33 | 6860  | 5910  | - | Transcriptional regulator,<br>AraC family                               | FIG00510130 | ff                                                               |
| fig 6666666.28482.peg.3103 | Contig_33 | 6971  | 7465  | + | Thiol peroxidase, Tpx-<br>type (EC 1.11.1.15)                           | FIG00002857 | isu;CBSS-257314.1.peg.752<br>isu;Thioredoxin-disulfide_reductase |
| fig 6666666.28482.peg.3104 | Contig_33 | 7591  | 7896  | + | hypothetical protein                                                    |             |                                                                  |
| fig 6666666.28482.peg.3105 | Contig_33 | 8845  | 7877  | - | Enoyl-[acyl-carrier-<br>protein] reductase [FMN]<br>(EC 1.3.1.9)        | FIG00007641 | idu(1);Fatty_Acid_Biosynthesis_FASII                             |
| fig 6666666.28482.peg.3106 | Contig_33 | 9222  | 8845  | - | hypothetical protein                                                    |             |                                                                  |
| fig 6666666.28482.peg.3107 | Contig_33 | 9431  | 10615 | + | FIG00830011:<br>hypothetical protein                                    | FIG00830008 | ff                                                               |
| fig 6666666.28482.peg.3108 | Contig_33 | 10837 | 10610 | - | hypothetical protein                                                    |             |                                                                  |
| fig 6666666.28482.peg.3109 | Contig_33 | 10853 | 12310 | + | FIG00825509:<br>hypothetical protein                                    | FIG00825507 | ff                                                               |
| fig 6666666.28482.peg.3110 | Contig_33 | 12330 | 13688 | + | FIG00825270:<br>hypothetical protein                                    | FIG00825268 | ff                                                               |
| fig 6666666.28482.peg.3111 | Contig_33 | 13711 | 15096 | + | hypothetical protein                                                    |             |                                                                  |
| fig 6666666.28482.peg.3112 | Contig_33 | 15351 | 18377 | + | Putative membrane<br>protein                                            |             |                                                                  |
| fig 6666666.28482.peg.3113 | Contig_33 | 18983 | 19975 | + | Saccharopine<br>dehydrogenase                                           |             |                                                                  |
| fig 6666666.28482.peg.3114 | Contig_33 | 19972 | 20721 | + | hypothetical protein                                                    |             |                                                                  |

|                            |           |       |       |   |                                               |             |                                              |
|----------------------------|-----------|-------|-------|---|-----------------------------------------------|-------------|----------------------------------------------|
| fig 6666666.28482.peg.3115 | Contig_33 | 21488 | 20805 | - | Response regulator CitB of citrate metabolism | FIG00229361 | ff                                           |
| fig 6666666.28482.peg.3116 | Contig_33 | 23155 | 21470 | - | hypothetical protein                          | FIG00638284 | ff                                           |
| fig 6666666.28482.peg.3117 | Contig_33 | 23217 | 24143 | + | FIG00821999: hypothetical protein             | FIG00821997 | ff                                           |
| fig 6666666.28482.peg.3118 | Contig_33 | 24981 | 24160 | - | alpha/beta hydrolase fold                     |             |                                              |
| fig 6666666.28482.peg.3119 | Contig_33 | 25095 | 26456 | + | FIG00822747: hypothetical protein             | FIG00822745 | ff                                           |
| fig 6666666.28482.peg.3120 | Contig_33 | 26449 | 27303 | + | PROBABLE MEMBRANE PROTEIN                     | FIG00816212 | ff                                           |
| fig 6666666.28482.peg.3121 | Contig_33 | 27333 | 27779 | + | Transcriptional regulator, AraC family        | FIG00510130 | ff                                           |
| fig 6666666.28482.peg.3122 | Contig_33 | 27784 | 28194 | + | putative lyase                                | FIG00999432 | ff                                           |
| fig 6666666.28482.peg.3123 | Contig_33 | 28519 | 28265 | - | hypothetical protein                          |             |                                              |
| fig 6666666.28482.peg.3124 | Contig_33 | 30058 | 28616 | - | D-serine/D-alanine/glycine transporter        | FIG00003984 | isu;Pyruvate_Alanine_Serine_Interconversions |
| fig 6666666.28482.peg.3125 | Contig_33 | 30384 | 30115 | - | iron-regulated elongation factor tu Tuf-like  | FIG00823055 | ff                                           |
| fig 6666666.28482.peg.3126 | Contig_33 | 31402 | 30389 | - | Quinone oxidoreductase (EC 1.6.5.5)           | FIG00002982 | idu(7);Quinone_oxidoreductase_family         |
| fig 6666666.28482.peg.3127 | Contig_33 | 31481 | 32140 | + | FIG00827117: hypothetical protein             | FIG00827116 | ff                                           |
| fig 6666666.28482.peg.3128 | Contig_33 | 32222 | 32893 | + | FIG00827117: hypothetical protein             | FIG00827116 | ff                                           |
| fig 6666666.28482.peg.3129 | Contig_33 | 32923 | 33768 | + | putative methyltransferase                    | FIG01125506 | ff                                           |
| fig 6666666.28482.peg.3130 | Contig_33 | 34582 | 33770 | - | FIG00827721: hypothetical protein             | FIG00827719 | ff                                           |

|                            |           |       |       |   |                                                   |             |                                                                                                                                                                                                                                    |
|----------------------------|-----------|-------|-------|---|---------------------------------------------------|-------------|------------------------------------------------------------------------------------------------------------------------------------------------------------------------------------------------------------------------------------|
| fig 6666666.28482.peg.3131 | Contig_33 | 34837 | 35034 | + | hypothetical protein                              |             |                                                                                                                                                                                                                                    |
| fig 6666666.28482.peg.3132 | Contig_33 | 35167 | 35367 | + | hypothetical protein                              |             |                                                                                                                                                                                                                                    |
| fig 6666666.28482.peg.3133 | Contig_33 | 36018 | 35377 | - | hypothetical protein                              | FIG00829159 | ff                                                                                                                                                                                                                                 |
| fig 6666666.28482.peg.3134 | Contig_33 | 36122 | 36796 | + | putative secreted protein                         | FIG00905474 | ff                                                                                                                                                                                                                                 |
| fig 6666666.28482.peg.3135 | Contig_33 | 37853 | 36783 | - | FIG00822799:<br>hypothetical protein              | FIG00822798 | ff                                                                                                                                                                                                                                 |
| fig 6666666.28482.peg.3136 | Contig_33 | 38610 | 37840 | - | putative<br>methyltransferase                     | FIG01125506 | ff                                                                                                                                                                                                                                 |
| fig 6666666.28482.peg.3137 | Contig_33 | 39833 | 38604 | - | Glycosyltransferase                               | FIG00007960 | ff                                                                                                                                                                                                                                 |
| fig 6666666.28482.peg.3138 | Contig_33 | 39795 | 39962 | + | hypothetical protein                              |             |                                                                                                                                                                                                                                    |
| fig 6666666.28482.peg.3139 | Contig_33 | 40411 | 40031 | - | Chitinase C precursor (EC 3.2.1.14)               | FIG01355520 | ff                                                                                                                                                                                                                                 |
| fig 6666666.28482.peg.3140 | Contig_33 | 40560 | 41375 | + | FIG00824527:<br>hypothetical protein              | FIG00824526 | ff                                                                                                                                                                                                                                 |
| fig 6666666.28482.peg.3141 | Contig_33 | 42281 | 41394 | - | Alpha/beta hydrolase fold (EC 3.8.1.5)            |             |                                                                                                                                                                                                                                    |
| fig 6666666.28482.peg.3142 | Contig_33 | 44690 | 42456 | - | Catalase (EC 1.11.1.6) / Peroxidase (EC 1.11.1.7) | FIG00000907 | icw(1);Oxidative_stress<br>icw(1);Oxidative_stress<br>idu(3);Photorespiration_(oxidative_C2_cycle)<br>idu(1);Protection_from_Reactive_Oxygen_Species<br>idu(3);Protection_from_Reactive_Oxygen_Species<br>idu(1);Auxin_degradation |
| fig 6666666.28482.peg.3143 | Contig_33 | 45179 | 44739 | - | Transcriptional regulator, FUR family             | FIG00002441 | idu(2);Oxidative_stress                                                                                                                                                                                                            |
| fig 6666666.28482.peg.3144 | Contig_33 | 46592 | 45327 | - | ErfK/YbiS/YcfS/YnhG family protein                | FIG01228918 | ff                                                                                                                                                                                                                                 |
| fig 6666666.28482.peg.3145 | Contig_33 | 46663 | 47424 | + | FIG00830083:<br>hypothetical protein              | FIG00830082 | ff                                                                                                                                                                                                                                 |

|                            |           |       |       |   |                                                                                                                                                                                   |             |                                |
|----------------------------|-----------|-------|-------|---|-----------------------------------------------------------------------------------------------------------------------------------------------------------------------------------|-------------|--------------------------------|
| fig 6666666.28482.peg.3146 | Contig_33 | 47484 | 49013 | + | FAD dependent oxidoreductase                                                                                                                                                      | FIG00453665 | ff                             |
| fig 6666666.28482.peg.3147 | Contig_33 | 50061 | 49018 | - | FIG00823150: hypothetical protein                                                                                                                                                 | FIG00823149 | ff                             |
| fig 6666666.28482.peg.3148 | Contig_33 | 50282 | 51631 | + | PPE family protein                                                                                                                                                                | FIG00013075 | idu(57);CBSS-164757.7.peg.5020 |
| fig 6666666.28482.peg.3149 | Contig_33 | 51945 | 52229 | + | hypothetical protein                                                                                                                                                              |             |                                |
| fig 6666666.28482.peg.3150 | Contig_33 | 52308 | 53111 | + | MLr4090 protein                                                                                                                                                                   | FIG01358600 | ff                             |
| fig 6666666.28482.peg.3151 | Contig_33 | 53399 | 53112 | - | hypothetical protein                                                                                                                                                              | FIG00638284 | ff                             |
| fig 6666666.28482.peg.3152 | Contig_33 | 53957 | 53403 | - | Alkyl hydroperoxide reductase and/or thiol-specific antioxidant family (AhpC/TSA) protein                                                                                         |             |                                |
| fig 6666666.28482.peg.3153 | Contig_33 | 54572 | 53979 | - | FIG00822146: hypothetical protein                                                                                                                                                 | FIG00822145 | ff                             |
| fig 6666666.28482.peg.3154 | Contig_33 | 55259 | 54630 | - | FIG00827381: hypothetical protein                                                                                                                                                 | FIG00827380 | ff                             |
| fig 6666666.28482.peg.3155 | Contig_33 | 56118 | 55348 | - | FIG00823638: hypothetical protein                                                                                                                                                 | FIG00823636 | ff                             |
| fig 6666666.28482.peg.3156 | Contig_33 | 56291 | 57895 | + | PPE family protein                                                                                                                                                                | FIG00013075 | idu(57);CBSS-164757.7.peg.5020 |
| fig 6666666.28482.peg.3157 | Contig_33 | 58076 | 59014 | + | hypothetical protein                                                                                                                                                              | FIG00638284 | ff                             |
| fig 6666666.28482.peg.3158 | Contig_33 | 59077 | 59976 | + | FIG00823859: hypothetical protein                                                                                                                                                 | FIG00823854 | ff                             |
| fig 6666666.28482.peg.3159 | Contig_33 | 63609 | 60175 | - | Adenylyl cyclase class-3/4/guanylyl cyclase / Disease resistance domain-containing protein / Tetratricopeptide repeat-containing protein / Transcriptional regulator, LuxR family | FIG01386132 | ff                             |

|                            |           |       |       |   |                                                                                                            |             |                                                                    |
|----------------------------|-----------|-------|-------|---|------------------------------------------------------------------------------------------------------------|-------------|--------------------------------------------------------------------|
| fig 6666666.28482.peg.3160 | Contig_33 | 63734 | 64972 | + | putative cytochrome P450 hydroxylase                                                                       | FIG00032437 | idu(49);Nitric_oxide_synthase                                      |
| fig 6666666.28482.peg.3161 | Contig_33 | 66386 | 65364 | - | FIG00822630: hypothetical protein                                                                          | FIG00822629 | ff                                                                 |
| fig 6666666.28482.peg.3162 | Contig_33 | 66718 | 66509 | - | hypothetical protein                                                                                       |             |                                                                    |
| fig 6666666.28482.peg.3163 | Contig_33 | 66707 | 68176 | + | 2-polyprenyl-6-methoxyphenol hydroxylase and related FAD-dependent oxidoreductases                         | FIG00453279 | ff                                                                 |
| fig 6666666.28482.peg.3164 | Contig_33 | 68358 | 68185 | - | hypothetical protein                                                                                       |             |                                                                    |
| fig 6666666.28482.peg.3165 | Contig_33 | 68454 | 69953 | + | FIG00832063: hypothetical protein                                                                          | FIG00832061 | ff                                                                 |
| fig 6666666.28482.peg.3166 | Contig_33 | 71182 | 69950 | - | FIG00831158: hypothetical protein                                                                          | FIG00831154 | ff                                                                 |
| fig 6666666.28482.peg.3167 | Contig_33 | 71273 | 72151 | + | Citrate lyase beta chain (EC 4.1.3.6)                                                                      | FIG00010100 | idu(2);Citrate_Metabolism,_Transport,_and_Regulation               |
| fig 6666666.28482.peg.3168 | Contig_33 | 72267 | 72653 | + | hypothetical protein                                                                                       |             |                                                                    |
| fig 6666666.28482.peg.3169 | Contig_33 | 73259 | 72669 | - | cAMP-binding proteins - catabolite gene activator and regulatory subunit of cAMP-dependent protein kinases | FIG00003090 | idu(1);cAMP_signaling_in_bacteria<br>idu(1);CBSS-479431.5.peg.3955 |
| fig 6666666.28482.peg.3170 | Contig_33 | 74141 | 73362 | - | Ribulosamine/erythrulosamine 3-kinase potentially involved in protein deglycation                          | FIG00002860 | isu;Protein_deglycation                                            |
| fig 6666666.28482.peg.3171 | Contig_33 | 74258 | 75493 | + | FIG00824986: hypothetical protein                                                                          | FIG00824984 | ff                                                                 |
| fig 6666666.28482.peg.3172 | Contig_34 | 453   | 1202  | + | hypothetical protein                                                                                       |             |                                                                    |
| fig 6666666.28482.peg.3173 | Contig_34 | 1199  | 2041  | + | hypothetical protein                                                                                       | FIG00638284 | ff                                                                 |

|                            |           |       |       |   |                                                                      |             |                                                                                           |
|----------------------------|-----------|-------|-------|---|----------------------------------------------------------------------|-------------|-------------------------------------------------------------------------------------------|
| fig 6666666.28482.peg.3174 | Contig_34 | 2069  | 3658  | + | hypothetical protein                                                 | FIG00638284 | ff                                                                                        |
| fig 6666666.28482.rna.34   | Contig_34 | 3811  | 3739  | - | tRNA-Arg-ACG                                                         |             | isu;tRNAs                                                                                 |
| fig 6666666.28482.rna.35   | Contig_34 | 3935  | 3847  | - | tRNA-Ser-GCT                                                         |             |                                                                                           |
| fig 6666666.28482.peg.3175 | Contig_34 | 4025  | 5101  | + | Biosynthetic Aromatic amino acid aminotransferase beta (EC 2.6.1.57) | FIG00032670 | idu(1);Phenylalanine_and_Tyrosine_B ranches_from_Chorismate                               |
| fig 6666666.28482.peg.3176 | Contig_34 | 5098  | 5559  | + | FIG00820948: hypothetical protein                                    | FIG00820947 | ff                                                                                        |
| fig 6666666.28482.peg.3177 | Contig_34 | 6198  | 5614  | - | Transcriptional regulator, ArsR family                               | FIG00003845 | idu(3);CBSS-1085.1.peg.1363                                                               |
| fig 6666666.28482.peg.3178 | Contig_34 | 6222  | 7046  | + | Enoyl-CoA hydratase                                                  | FIG00820022 | ff                                                                                        |
| fig 6666666.28482.peg.3179 | Contig_34 | 7072  | 8310  | + | Beta-lactamase                                                       | FIG00021206 | isu;Beta-lactamase                                                                        |
| fig 6666666.28482.peg.3180 | Contig_34 | 8341  | 8532  | + | FIG00825779: hypothetical protein                                    | FIG00825778 | ff                                                                                        |
| fig 6666666.28482.peg.3181 | Contig_34 | 8568  | 9674  | + | FIG00820291: hypothetical protein                                    | FIG00820290 | ff                                                                                        |
| fig 6666666.28482.peg.3182 | Contig_34 | 10416 | 10279 | - | hypothetical protein                                                 |             |                                                                                           |
| fig 6666666.28482.peg.3183 | Contig_34 | 11403 | 11519 | + | hypothetical protein                                                 |             |                                                                                           |
| fig 6666666.28482.peg.3184 | Contig_34 | 12993 | 12826 | - | hypothetical protein                                                 |             |                                                                                           |
| fig 6666666.28482.peg.3185 | Contig_34 | 13698 | 14291 | + | hypothetical protein                                                 |             |                                                                                           |
| fig 6666666.28482.peg.3186 | Contig_34 | 14783 | 14902 | + | hypothetical protein                                                 |             |                                                                                           |
| fig 6666666.28482.peg.3187 | Contig_34 | 15348 | 15091 | - | hypothetical protein                                                 |             |                                                                                           |
| fig 6666666.28482.peg.3188 | Contig_34 | 17494 | 15857 | - | hypothetical protein                                                 |             |                                                                                           |
| fig 6666666.28482.peg.3189 | Contig_34 | 19488 | 17779 | - | ATP-dependent DNA helicase UvrD/PcrA                                 | FIG00000372 | idu(1);CBSS-393121.3.peg.1913<br>idu(1);DNA_repair,_bacterial_UvrD_a nd_related_helicases |
| fig 6666666.28482.peg.3190 | Contig_34 | 21326 | 19485 | - | hypothetical protein                                                 | FIG00638284 | ff                                                                                        |
| fig 6666666.28482.peg.3191 | Contig_34 | 21959 | 21735 | - | hypothetical protein                                                 |             |                                                                                           |
| fig 6666666.28482.peg.3192 | Contig_34 | 22593 | 22868 | + | hypothetical protein                                                 |             |                                                                                           |
| fig 6666666.28482.peg.3193 | Contig_34 | 24336 | 23227 | - | putative ATPase                                                      | FIG01449448 | ff                                                                                        |
| fig 6666666.28482.peg.3194 | Contig_34 | 26572 | 25460 | - | Arsenical-resistance protein ACR3                                    | FIG00008889 | isu;Arsenic_resistance                                                                    |

|                            |           |       |       |   |                                                                                      |             |                                                                                                                                                                           |
|----------------------------|-----------|-------|-------|---|--------------------------------------------------------------------------------------|-------------|---------------------------------------------------------------------------------------------------------------------------------------------------------------------------|
| fig 6666666.28482.peg.3195 | Contig_34 | 26770 | 27006 | + | hypothetical protein                                                                 |             |                                                                                                                                                                           |
| fig 6666666.28482.peg.3196 | Contig_34 | 27584 | 27111 | - | Lactoylglutathione lyase (EC 4.4.1.5)                                                | FIG00004743 | idu(1);Glutathione:_Non-redox_reactions<br>idu(1);Methylglyoxal_Metabolism                                                                                                |
| fig 6666666.28482.peg.3197 | Contig_34 | 27689 | 28048 | + | regulatory protein, ArsR                                                             |             |                                                                                                                                                                           |
| fig 6666666.28482.peg.3198 | Contig_34 | 28233 | 28901 | + | Arsenical resistance operon repressor / Arsenate reductase (EC 1.20.4.1)             |             | idu(5);Transcription_repair_cluster<br>idu(5);CBSS-315749.4.peg.3658<br>icw(1);Arsenic_resistance<br>icw(1);Arsenic_resistance<br>idu(5);Anaerobic_respiratory_reductases |
| fig 6666666.28482.peg.3199 | Contig_34 | 29074 | 30033 | + | Phosphate ABC transporter, periplasmic phosphate-binding protein PstS (TC 3.A.1.7.1) | FIG00010508 | idu(4);High_affinity_phosphate_transporter_and_control_of_PHO_regulon<br>idu(4);Phosphate_metabolism<br>idu(4);PhoR-PhoB_two-component_regulatory_system                  |
| fig 6666666.28482.peg.3200 | Contig_34 | 30105 | 31559 | + | NADH oxidase (putative)                                                              | FIG01704807 | ff                                                                                                                                                                        |
| fig 6666666.28482.peg.3201 | Contig_34 | 33192 | 34709 | + | dNTP triphosphohydrolase, broad substrate specificity, subgroup 2                    |             | isu;Purine_conversions<br>isu;dNTP_triphosphohydrolase_protein_family                                                                                                     |
| fig 6666666.28482.peg.3202 | Contig_34 | 36030 | 35512 | - | hypothetical protein                                                                 | FIG00638284 | ff                                                                                                                                                                        |
| fig 6666666.28482.peg.3203 | Contig_34 | 36240 | 36524 | + | hypothetical protein                                                                 |             |                                                                                                                                                                           |
| fig 6666666.28482.peg.3204 | Contig_34 | 36524 | 36775 | + | hypothetical protein                                                                 |             |                                                                                                                                                                           |
| fig 6666666.28482.peg.3205 | Contig_34 | 36831 | 37040 | + | hypothetical protein                                                                 |             |                                                                                                                                                                           |
| fig 6666666.28482.peg.3206 | Contig_34 | 37349 | 37468 | + | hypothetical protein                                                                 |             |                                                                                                                                                                           |
| fig 6666666.28482.peg.3207 | Contig_34 | 37461 | 39662 | + | hypothetical protein                                                                 | FIG00638284 | ff                                                                                                                                                                        |
| fig 6666666.28482.peg.3208 | Contig_34 | 39659 | 40636 | + | hypothetical protein                                                                 | FIG00638284 | ff                                                                                                                                                                        |

|                            |           |       |       |   |                                               |             |                                                                                                                                                                |
|----------------------------|-----------|-------|-------|---|-----------------------------------------------|-------------|----------------------------------------------------------------------------------------------------------------------------------------------------------------|
| fig 6666666.28482.peg.3209 | Contig_34 | 40678 | 41661 | + | DNA methylase N-4/N-6                         |             |                                                                                                                                                                |
| fig 6666666.28482.peg.3210 | Contig_34 | 41748 | 42101 | + | hypothetical protein                          | FIG00638284 | ff                                                                                                                                                             |
| fig 6666666.28482.peg.3211 | Contig_34 | 42520 | 42771 | + | hypothetical protein                          |             |                                                                                                                                                                |
| fig 6666666.28482.rna.36   | Contig_34 | 45390 | 45304 | - | tRNA-Ser-TGA                                  |             |                                                                                                                                                                |
| fig 6666666.28482.peg.3212 | Contig_34 | 45428 | 46396 | + | Quinone oxidoreductase (EC 1.6.5.5)           | FIG00002982 | idu(7);Quinone_oxidoreductase_family                                                                                                                           |
| fig 6666666.28482.peg.3213 | Contig_34 | 47716 | 46511 | - | Cysteine desulfurase (EC 2.8.1.7)             | FIG00000001 | idu(2);Iron-sulfur_cluster_assembly idu(2);CBSS-84588.1.peg.1247 idu(2);CBSS-393130.3.peg.794 idu(2);mnm5U34_biosynthesis_bacteria idu(2);Alanine_biosynthesis |
| fig 6666666.28482.peg.3214 | Contig_34 | 47830 | 49800 | + | FIG00820726: hypothetical protein             | FIG00820725 | ff                                                                                                                                                             |
| fig 6666666.28482.peg.3215 | Contig_34 | 49813 | 50358 | + | FIG00822472: hypothetical protein             | FIG00822465 | ff                                                                                                                                                             |
| fig 6666666.28482.peg.3216 | Contig_34 | 50363 | 51172 | + | O-antigen export system, ATP-binding protein  | FIG00548123 | ff                                                                                                                                                             |
| fig 6666666.28482.peg.3217 | Contig_34 | 51169 | 52095 | + | Putative glycosyl transferase                 | FIG01195418 | ff                                                                                                                                                             |
| fig 6666666.28482.peg.3218 | Contig_34 | 52092 | 52922 | + | O-antigen export system permease protein RfbD | FIG00521220 | ff                                                                                                                                                             |
| fig 6666666.28482.peg.3219 | Contig_34 | 52928 | 53296 | + | FIG00827542: hypothetical protein             |             |                                                                                                                                                                |
| fig 6666666.28482.peg.3220 | Contig_34 | 54442 | 53462 | - | hypothetical protein                          | FIG00638284 | ff                                                                                                                                                             |
| fig 6666666.28482.peg.3221 | Contig_34 | 54913 | 55452 | + | Queuosine biosynthesis QueD, PTPS-I           |             |                                                                                                                                                                |

|                            |           |       |       |   |                                                                                                               |             |    |
|----------------------------|-----------|-------|-------|---|---------------------------------------------------------------------------------------------------------------|-------------|----|
| fig 6666666.28482.peg.3222 | Contig_34 | 55624 | 56103 | + | Nucleoside diphosphate kinase regulator                                                                       | FIG01320511 | ff |
| fig 6666666.28482.peg.3223 | Contig_34 | 56185 | 56571 | + | Possible membrane protein                                                                                     | FIG01121868 | ff |
| fig 6666666.28482.peg.3224 | Contig_34 | 56654 | 58024 | + | Oxidoreductase, FAD-binding protein                                                                           | FIG00546255 | ff |
| fig 6666666.28482.peg.3225 | Contig_34 | 58051 | 58818 | + | 3-oxoacyl-[acyl-carrier protein] reductase paralog (EC 1.1.1.100)                                             | FIG00763697 | ff |
| fig 6666666.28482.peg.3226 | Contig_34 | 58821 | 60767 | + | putative membrane protein                                                                                     | FIG00672847 | ff |
| fig 6666666.28482.peg.3227 | Contig_34 | 60767 | 64033 | + | INTEGRAL MEMBRANE INDOLYLACETYLINOSITOL ARABINOSYLTRANSFERASE EMBC (ARABINOSYLINDOLYLACETYLINOSITOL SYNTHASE) | FIG01954080 | ff |
| fig 6666666.28482.peg.3228 | Contig_34 | 64157 | 64417 | + | COG0640: Predicted transcriptional regulators                                                                 |             |    |
| fig 6666666.28482.peg.3229 | Contig_34 | 64423 | 64896 | + | Putative uncharacterized protein BCG_2054                                                                     | FIG00826548 | ff |
| fig 6666666.28482.peg.3230 | Contig_34 | 64893 | 65516 | + | FIG00821723: hypothetical protein                                                                             | FIG00821722 | ff |
| fig 6666666.28482.peg.3231 | Contig_34 | 66663 | 65524 | - | EmbR protein                                                                                                  | FIG01423950 | ff |
| fig 6666666.28482.peg.3232 | Contig_34 | 66856 | 70080 | + | Probable arabinosyltransferase A (EC 2.4.2.-)                                                                 | FIG01331801 | ff |

|                            |           |       |       |   |                                                                                                                                                                                     |             |                                                                                                                                                        |
|----------------------------|-----------|-------|-------|---|-------------------------------------------------------------------------------------------------------------------------------------------------------------------------------------|-------------|--------------------------------------------------------------------------------------------------------------------------------------------------------|
| fig 6666666.28482.peg.3233 | Contig_34 | 70077 | 73325 | + | Probable arabinosyltransferase B (EC 2.4.2.-)                                                                                                                                       | FIG00820183 | ff                                                                                                                                                     |
| fig 6666666.28482.peg.3234 | Contig_34 | 73531 | 73998 | + | hypothetical protein                                                                                                                                                                |             |                                                                                                                                                        |
| fig 6666666.28482.peg.3235 | Contig_34 | 74180 | 73968 | - | hypothetical protein                                                                                                                                                                |             |                                                                                                                                                        |
| fig 6666666.28482.peg.3236 | Contig_34 | 74372 | 74839 | + | hypothetical protein                                                                                                                                                                | FIG00638284 | ff                                                                                                                                                     |
| fig 6666666.28482.peg.3237 | Contig_34 | 74836 | 75252 | + | hypothetical protein                                                                                                                                                                | FIG00638284 | ff                                                                                                                                                     |
| fig 6666666.28482.peg.3238 | Contig_34 | 75265 | 77049 | + | Probable acyl-CoA dehydrogenase fadE35 (EC 1.3.99.-)                                                                                                                                |             | ff                                                                                                                                                     |
| fig 6666666.28482.peg.3239 | Contig_34 | 78698 | 77118 | - | Propionyl-CoA carboxylase beta chain (EC 6.4.1.3)                                                                                                                                   | FIG01304918 | idu(2);Mycobacterium_virulence_op<br>ron_involved_in_fatty_acids_biosynt<br>hesis idu(2);Serine-glyoxylate_cycle                                       |
| fig 6666666.28482.peg.3240 | Contig_34 | 84039 | 78706 | - | Probable polyketide synthase, similar to many. e.g. gp M63676 SERERYAA_1 S.erythraea first ORF of eryA gene, involved in complex polyketide formation in erythromycin biosynthesis. |             | ff                                                                                                                                                     |
| fig 6666666.28482.peg.3241 | Contig_34 | 85948 | 84050 | - | Long-chain-fatty-acid--CoA ligase (EC 6.2.1.3)                                                                                                                                      | FIG00018699 | idu(72);n-Phenylalkanoic_acid_degradation<br>idu(72);Fatty_acid_metabolism_clust<br>er idu(72);Biotin_synthesis_cluster<br>idu(72);Biotin_biosynthesis |
| fig 6666666.28482.peg.3242 | Contig_34 | 87223 | 86273 | - | hypothetical protein Rv3802c                                                                                                                                                        | FIG00018712 | ff                                                                                                                                                     |

|                            |           |       |       |   |                                                                                                                |             |                                                                                                                                |
|----------------------------|-----------|-------|-------|---|----------------------------------------------------------------------------------------------------------------|-------------|--------------------------------------------------------------------------------------------------------------------------------|
| fig 6666666.28482.peg.3243 | Contig_34 | 87254 | 87409 | + | hypothetical protein                                                                                           |             |                                                                                                                                |
| fig 6666666.28482.peg.3244 | Contig_34 | 88290 | 87406 | - | Antigen 85-C precursor<br>(85C) (Antigen 85<br>complex C) (Ag85C)<br>(Mycolyl transferase 85C)<br>(EC 2.3.1.-) | FIG00027986 | ff                                                                                                                             |
| fig 6666666.28482.peg.3245 | Contig_34 | 89430 | 88480 | - | Esterase, secreted<br>fibronectin-binding<br>protein antigen 85-B<br>FbpB                                      | FIG00820332 | ff                                                                                                                             |
| fig 6666666.28482.peg.3246 | Contig_34 | 91798 | 89861 | - | hypothetical protein<br>Rv3805c                                                                                | FIG00010871 | ff                                                                                                                             |
| fig 6666666.28482.peg.3247 | Contig_34 | 92738 | 91830 | - | POSSIBLE CONSERVED<br>INTEGRAL MEMBRANE<br>PROTEIN                                                             | FIG01037873 | ff                                                                                                                             |
| fig 6666666.28482.peg.3248 | Contig_34 | 93258 | 92731 | - | FIG008913: Membrane-<br>associated phospholipid<br>phosphatase                                                 | FIG00485540 | ff                                                                                                                             |
| fig 6666666.28482.peg.3249 | Contig_34 | 95143 | 93251 | - | Galactofuranosyl<br>transferase (EC 2.-.-)                                                                     | FIG00511876 | ff                                                                                                                             |
| fig 6666666.28482.peg.3250 | Contig_34 | 96422 | 95223 | - | UDP-galactopyranose<br>mutase (EC 5.4.99.9)                                                                    | FIG00003472 | isu;LOS_core_oligosaccharide_biosyn<br>thesis                                                                                  |
| fig 6666666.28482.peg.3251 | Contig_35 | 35    | 373   | + | Phosphoglycolate<br>phosphatase (EC<br>3.1.3.18)                                                               | FIG00003555 | isu;Glycolate,_glyoxylate_interconver<br>sions<br>isu;Photorespiration_(oxidative_C2_c<br>ycle) isu;2-phosphoglycolate_salvage |
| fig 6666666.28482.peg.3252 | Contig_35 | 366   | 869   | + | Low molecular weight<br>protein tyrosine<br>phosphatase (EC<br>3.1.3.48)                                       | FIG00059124 | isu;Protein_deglycation<br>isu;LMPTP_YfKJ_cluster isu;CBSS-<br>176280.1.peg.1561                                               |

|                            |           |       |       |   |                                                                                    |             |                                                                                                                                                                            |
|----------------------------|-----------|-------|-------|---|------------------------------------------------------------------------------------|-------------|----------------------------------------------------------------------------------------------------------------------------------------------------------------------------|
| fig 6666666.28482.peg.3253 | Contig_35 | 866   | 1678  | + | Cytochrome oxidase biogenesis protein Surf1, facilitates heme A insertion          | FIG00018846 | isu;CBSS-316057.3.peg.563<br>isu;Biogenesis_of_cytochrome_c_oxidases                                                                                                       |
| fig 6666666.28482.peg.3254 | Contig_35 | 2691  | 1759  | - | Adenosylcobinamide-phosphate synthase                                              | FIG00000689 | isu;Cobalamin_synthesis<br>isu;Coenzyme_B12_biosynthesis                                                                                                                   |
| fig 6666666.28482.peg.3255 | Contig_35 | 2872  | 2732  | - | hypothetical protein                                                               |             |                                                                                                                                                                            |
| fig 6666666.28482.peg.3256 | Contig_35 | 2949  | 3764  | + | hypothetical protein Rv2237                                                        | FIG01319570 | ff                                                                                                                                                                         |
| fig 6666666.28482.peg.3257 | Contig_35 | 4981  | 3848  | - | Epoxide hydrolase (EC 3.3.2.9)                                                     | FIG00009455 | idu(3);CBSS-410289.13.peg.3174                                                                                                                                             |
| fig 6666666.28482.peg.3258 | Contig_35 | 5900  | 5007  | - | Sulfatase modifying factor 1 precursor (C-alpha-formylglycine-generating enzyme 1) | FIG00003489 | idu(1);Sulfatases_and_sulfatase_modifying_factor_1                                                                                                                         |
| fig 6666666.28482.peg.3259 | Contig_35 | 6822  | 5893  | - | FIG068086: hypothetical protein                                                    | FIG00068086 | icw(1);Sulfatases_and_sulfatase_modifying_factor_1                                                                                                                         |
| fig 6666666.28482.peg.3260 | Contig_35 | 8366  | 6819  | - | Arylsulfatase (EC 3.1.6.1)                                                         | FIG00016566 | icw(2);Sulfatases_and_sulfatase_modifying_factor_1<br>idu(3);Galactosylceramide_and_Sulfatide_metabolism<br>idu(3);Steroid_sulfates<br>idu(3);Alkanesulfonate_assimilation |
| fig 6666666.28482.peg.3261 | Contig_35 | 8813  | 8505  | - | hypothetical protein                                                               |             |                                                                                                                                                                            |
| fig 6666666.28482.peg.3262 | Contig_35 | 10029 | 9127  | - | hypothetical protein                                                               | FIG00638284 | ff                                                                                                                                                                         |
| fig 6666666.28482.peg.3263 | Contig_35 | 10499 | 10191 | - | hypothetical protein                                                               |             |                                                                                                                                                                            |
| fig 6666666.28482.peg.3264 | Contig_35 | 10498 | 10626 | + | hypothetical protein                                                               |             |                                                                                                                                                                            |
| fig 6666666.28482.peg.3265 | Contig_35 | 13718 | 10788 | - | Putative membrane protein                                                          | FIG01056920 | ff                                                                                                                                                                         |
| fig 6666666.28482.peg.3266 | Contig_35 | 14305 | 13715 | - | membrane protein, MmpS family                                                      | FIG01309473 | ff                                                                                                                                                                         |

|                            |           |       |       |   |                                                                |             |                                                                                                                    |
|----------------------------|-----------|-------|-------|---|----------------------------------------------------------------|-------------|--------------------------------------------------------------------------------------------------------------------|
| fig 6666666.28482.peg.3267 | Contig_35 | 14931 | 14329 | - | Transcriptional regulator, TetR family                         | FIG00554417 | ff                                                                                                                 |
| fig 6666666.28482.rna.37   | Contig_35 | 15344 | 15273 | - | tRNA-Val-TAC                                                   |             |                                                                                                                    |
| fig 6666666.28482.peg.3268 | Contig_35 | 15871 | 15410 | - | Alkyl hydroperoxide reductase subunit C-like protein           | FIG01258694 | idu(1);Oxidative_stress<br>idu(1);Rubrerythrin<br>idu(1);Thioredoxin-disulfide_reductase                           |
| fig 6666666.28482.peg.3269 | Contig_35 | 16293 | 15871 | - | FIG00819990: hypothetical protein                              | FIG00819989 | ff                                                                                                                 |
| fig 6666666.28482.peg.3270 | Contig_35 | 16890 | 16387 | - | FIG00820323: hypothetical protein                              | FIG00820322 | ff                                                                                                                 |
| fig 6666666.28482.peg.3271 | Contig_35 | 17094 | 19883 | + | Pyruvate dehydrogenase E1 component (EC 1.2.4.1)               | FIG00137886 | isu;Pyruvate_metabolism_II:_acetyl-CoA,_acetogenesis_from_pyruvate<br>isu;Dehydrogenase_complexes                  |
| fig 6666666.28482.peg.3272 | Contig_35 | 20083 | 21408 | + | Regulator of polyketide synthase expression                    | FIG00056421 | ff                                                                                                                 |
| fig 6666666.28482.peg.3273 | Contig_35 | 21549 | 22457 | + | Malonyl CoA-acyl carrier protein transacylase (EC 2.3.1.39)    | FIG00000319 | icw(3);Fatty_Acid_Biosynthesis_FASII                                                                               |
| fig 6666666.28482.peg.3274 | Contig_35 | 22538 | 22885 | + | Acyl carrier protein                                           | FIG00002328 | icw(2);Fatty_Acid_Biosynthesis_FASII<br>idu(2);Glycerolipid_and_Glycerophospholipid_Metabolism_in_Bacteria         |
| fig 6666666.28482.peg.3275 | Contig_35 | 22882 | 24132 | + | 3-oxoacyl-[acyl-carrier-protein] synthase, KASII (EC 2.3.1.41) | FIG00002246 | icw(1);Mycobacterium_virulence_operon_involved_in_fatty_acids_biosynthesis<br>icw(1);Fatty_Acid_Biosynthesis_FASII |

|                            |           |       |       |   |                                                                                                        |             |                                                                                                                                                                              |
|----------------------------|-----------|-------|-------|---|--------------------------------------------------------------------------------------------------------|-------------|------------------------------------------------------------------------------------------------------------------------------------------------------------------------------|
| fig 6666666.28482.peg.3276 | Contig_35 | 24253 | 25467 | + | 3-oxoacyl-[acyl-carrier-protein] synthase, KASII (EC 2.3.1.41)                                         | FIG00002246 | icw(1);Mycobacterium_virulence_operon_involved_in_fatty_acids_biosynthesis<br>icw(1);Fatty_Acid_Biosynthesis_FASII                                                           |
| fig 6666666.28482.peg.3277 | Contig_35 | 25512 | 26933 | + | Propionyl-CoA carboxylase beta chain (EC 6.4.1.3)                                                      | FIG01304918 | icw(2);Mycobacterium_virulence_operon_involved_in_fatty_acids_biosynthesis<br>idu(2);Serine-glyoxylate_cycle                                                                 |
| fig 6666666.28482.peg.3278 | Contig_35 | 27635 | 27952 | + | FIG00821976:<br>hypothetical protein                                                                   | FIG00821975 | ff                                                                                                                                                                           |
| fig 6666666.28482.peg.3279 | Contig_35 | 28771 | 28028 | - | hypothetical protein                                                                                   | FIG00638284 | ff                                                                                                                                                                           |
| fig 6666666.28482.peg.3280 | Contig_35 | 30378 | 28768 | - | FAD-binding<br>monooxygenase,<br>PheA/TfdB family,<br>similarity to 2,4-dichlorophenol 6-monooxygenase | FIG01103239 | ff                                                                                                                                                                           |
| fig 6666666.28482.peg.3281 | Contig_35 | 31086 | 30457 | - | Transcriptional regulator, TetR family                                                                 | FIG00554417 | ff                                                                                                                                                                           |
| fig 6666666.28482.peg.3282 | Contig_35 | 32657 | 31128 | - | Glycerol-3-phosphate dehydrogenase (EC 1.1.5.3)                                                        | FIG00229386 | idu(1);Respiratory_dehydrogenases_1<br>idu(1);Glycerol_and_Glycerol-3-phosphate_Uptake_and_Utilization<br>idu(1);Glycerolipid_and_Glycerophospholipid_Metabolism_in_Bacteria |
| fig 6666666.28482.peg.3283 | Contig_35 | 33223 | 32654 | - | Transcriptional regulator, TetR family                                                                 | FIG00554417 | ff                                                                                                                                                                           |
| fig 6666666.28482.peg.3284 | Contig_35 | 33241 | 34851 | + | Flavoprotein                                                                                           | FIG00661484 | ff                                                                                                                                                                           |
| fig 6666666.28482.peg.3285 | Contig_35 | 34848 | 35762 | + | Diacylglycerol kinase-related protein                                                                  | FIG01037700 | ff                                                                                                                                                                           |

|                            |           |       |       |   |                                                                                                                            |             |                                                                                        |
|----------------------------|-----------|-------|-------|---|----------------------------------------------------------------------------------------------------------------------------|-------------|----------------------------------------------------------------------------------------|
| fig 6666666.28482.peg.3286 | Contig_35 | 36773 | 35763 | - | hypothetical protein                                                                                                       | FIG00638284 | ff                                                                                     |
| fig 6666666.28482.peg.3287 | Contig_35 | 36888 | 37754 | + | hypothetical protein                                                                                                       | FIG00638284 | ff                                                                                     |
| fig 6666666.28482.peg.3288 | Contig_35 | 38297 | 37764 | - | FIG00820627:<br>hypothetical protein                                                                                       | FIG00820624 | ff                                                                                     |
| fig 6666666.28482.peg.3289 | Contig_35 | 39224 | 38400 | - | Beta-lactamase class C<br>and other penicillin<br>binding proteins                                                         | FIG00000681 | idu(2);Beta-lactamase                                                                  |
| fig 6666666.28482.peg.3290 | Contig_35 | 40240 | 39221 | - | Possible transcriptional<br>regulatory protein                                                                             | FIG01311821 | ff                                                                                     |
| fig 6666666.28482.peg.3291 | Contig_35 | 40433 | 41506 | + | Formaldehyde<br>dehydrogenase MscR,<br>NAD/mycothiol-<br>dependent (EC 1.2.1.66) /<br>S-nitrosomycothiol<br>reductase MscR | FIG00013253 | idu(1);Glutathione_analogs:_mycothi<br>ol<br>icw(1);Glutathione_analogs:_mycothi<br>ol |
| fig 6666666.28482.peg.3292 | Contig_35 | 41506 | 42129 | + | Putative hydrolase in<br>cluster with<br>formaldehyde/S-<br>nitrosomycothiol<br>reductase MscR                             | FIG00146043 | icw(1);Glutathione_analogs:_mycothi<br>ol                                              |
| fig 6666666.28482.peg.3293 | Contig_35 | 42223 | 42861 | + | Flavin reductase (EC<br>1.5.1.30)                                                                                          |             | isu;Heme,_hemin_uptake_and_utiliza<br>tion_systems_in_GramNegatives                    |
| fig 6666666.28482.peg.3294 | Contig_35 | 42906 | 43382 | + | Transcriptional regulator,<br>MarR family                                                                                  |             |                                                                                        |
| fig 6666666.28482.peg.3295 | Contig_35 | 43511 | 43879 | + | hypothetical protein                                                                                                       | FIG00638284 | ff                                                                                     |
| fig 6666666.28482.peg.3296 | Contig_35 | 43882 | 44289 | + | hypothetical protein                                                                                                       |             |                                                                                        |
| fig 6666666.28482.peg.3297 | Contig_35 | 44286 | 45827 | + | Multicopper oxidase                                                                                                        | FIG00060246 | idu(2);Copper_homeostasis                                                              |
| fig 6666666.28482.peg.3298 | Contig_35 | 45878 | 46153 | + | hypothetical protein                                                                                                       |             |                                                                                        |
| fig 6666666.28482.peg.3299 | Contig_35 | 47390 | 46236 | - | hypothetical protein                                                                                                       | FIG00638284 | ff                                                                                     |

|                            |           |       |       |   |                                                                                             |             |                               |
|----------------------------|-----------|-------|-------|---|---------------------------------------------------------------------------------------------|-------------|-------------------------------|
| fig 6666666.28482.peg.3300 | Contig_35 | 48197 | 47472 | - | FIG00820673:<br>hypothetical protein                                                        | FIG00820672 | ff                            |
| fig 6666666.28482.peg.3301 | Contig_35 | 49642 | 48194 | - | Apolipoprotein N-<br>acyltransferase (EC 2.3.1.-<br>)                                       | FIG01303912 | isu;Lipoprotein_Biosynthesis  |
| fig 6666666.28482.peg.3302 | Contig_35 | 49729 | 50685 | + | Oxidoreductase, short-<br>chain<br>dehydrogenase/reductas<br>e family                       | FIG00993242 | ff                            |
| fig 6666666.28482.peg.3303 | Contig_35 | 50699 | 51805 | + | S-adenosyl-L-<br>methionine:salicylic acid<br>carboxyl<br>methyltransferase-like<br>protein | FIG00822093 | ff                            |
| fig 6666666.28482.peg.3304 | Contig_35 | 51878 | 52297 | + | FIG00824532:<br>hypothetical protein                                                        | FIG00824529 | ff                            |
| fig 6666666.28482.peg.3305 | Contig_35 | 53987 | 52299 | - | hypothetical protein                                                                        |             |                               |
| fig 6666666.28482.peg.3306 | Contig_35 | 55177 | 54092 | - | FIG00821845:<br>hypothetical protein                                                        | FIG00821844 | ff                            |
| fig 6666666.28482.peg.3307 | Contig_35 | 55273 | 55620 | + | FIG00830175:<br>hypothetical protein                                                        | FIG00830173 | ff                            |
| fig 6666666.28482.peg.3308 | Contig_35 | 55634 | 56929 | + | putative cytochrome<br>P450 hydroxylase                                                     | FIG00032437 | idu(49);Nitric_oxide_synthase |
| fig 6666666.28482.peg.3309 | Contig_35 | 57027 | 57566 | + | FIG00821908:<br>hypothetical protein                                                        | FIG00821906 | ff                            |
| fig 6666666.28482.peg.3310 | Contig_35 | 58282 | 57575 | - | haloacid dehalogenase,<br>type II                                                           | FIG00823920 | ff                            |
| fig 6666666.28482.peg.3311 | Contig_35 | 58341 | 58694 | + | Possible membrane<br>protein                                                                | FIG01121868 | ff                            |
| fig 6666666.28482.peg.3312 | Contig_35 | 58691 | 59020 | + | Possible membrane<br>protein                                                                |             |                               |
| fig 6666666.28482.peg.3313 | Contig_35 | 59020 | 59901 | + | alpha/beta hydrolase fold                                                                   |             |                               |

|                            |           |       |       |   |                                        |             |                                                                                                                                                                                                                                                                                                                                                   |
|----------------------------|-----------|-------|-------|---|----------------------------------------|-------------|---------------------------------------------------------------------------------------------------------------------------------------------------------------------------------------------------------------------------------------------------------------------------------------------------------------------------------------------------|
| fig 6666666.28482.peg.3314 | Contig_35 | 59987 | 60715 | + | cutinase Cut1                          | FIG01392700 | ff                                                                                                                                                                                                                                                                                                                                                |
| fig 6666666.28482.peg.3315 | Contig_35 | 61448 | 60720 | - | N-acetylmuramoyl-L-alanine amidase     | FIG01231886 | ff                                                                                                                                                                                                                                                                                                                                                |
| fig 6666666.28482.peg.3316 | Contig_35 | 61697 | 62560 | + | epoxide hydrolase( EC:3.3.2.3 )        |             |                                                                                                                                                                                                                                                                                                                                                   |
| fig 6666666.28482.peg.3317 | Contig_35 | 62659 | 63024 | + | FIG00831733: hypothetical protein      | FIG00831731 | ff                                                                                                                                                                                                                                                                                                                                                |
| fig 6666666.28482.peg.3318 | Contig_35 | 63684 | 63028 | - | Enoyl-CoA hydratase (EC 4.2.1.17)      | FIG00033206 | idu(51);n-Phenylalkanoic_acid_degradation<br>idu(51);Polyhydroxybutyrate_metabolism<br>idu(51);Isoleucine_degradation<br>idu(51);Fatty_acid_metabolism_cluster<br>idu(51);Lysine_fermentation<br>idu(51);Butanol_Biosynthesis<br>idu(51);Acetyl-CoA_fermentation_to_Butyrate<br>idu(51);Valine_degradation<br>idu(51);Butyrate_metabolism_cluster |
| fig 6666666.28482.peg.3319 | Contig_35 | 64313 | 63681 | - | Transcriptional regulator, TetR family | FIG00554417 | ff                                                                                                                                                                                                                                                                                                                                                |
| fig 6666666.28482.peg.3320 | Contig_35 | 64754 | 64347 | - | FIG00826350: hypothetical protein      | FIG00826348 | ff                                                                                                                                                                                                                                                                                                                                                |
| fig 6666666.28482.peg.3321 | Contig_35 | 65905 | 65081 | - | Possible membrane protein              |             |                                                                                                                                                                                                                                                                                                                                                   |
| fig 6666666.28482.peg.3322 | Contig_35 | 66119 | 67381 | + | hypothetical protein                   |             |                                                                                                                                                                                                                                                                                                                                                   |
| fig 6666666.28482.peg.3323 | Contig_35 | 67518 | 68297 | + | hypothetical protein                   | FIG00638284 | ff                                                                                                                                                                                                                                                                                                                                                |

|                            |           |       |       |   |                                                           |             |                                                                                                              |
|----------------------------|-----------|-------|-------|---|-----------------------------------------------------------|-------------|--------------------------------------------------------------------------------------------------------------|
| fig 6666666.28482.peg.3324 | Contig_35 | 68422 | 69270 | + | 3-oxoacyl-[acyl-carrier protein] reductase (EC 1.1.1.100) | FIG00621114 | idu(38);CBSS-246196.1.peg.364<br>idu(38);CBSS-164757.7.peg.5020<br>idu(38);Fatty_Acid_Biosynthesis_FASI<br>I |
| fig 6666666.28482.peg.3325 | Contig_35 | 70145 | 69267 | - | hypothetical protein                                      | FIG00638284 | ff                                                                                                           |
| fig 6666666.28482.peg.3326 | Contig_35 | 72303 | 72085 | - | hypothetical protein                                      |             |                                                                                                              |
| fig 6666666.28482.peg.3327 | Contig_35 | 75225 | 72586 | - | COG0553: Superfamily II DNA/RNA helicases, SNF2 family    | FIG00628295 | ff                                                                                                           |
| fig 6666666.28482.peg.3328 | Contig_35 | 75351 | 78761 | + | Superfamily II DNA/RNA helicases, SNF2 family             | FIG01255181 | isu;CBSS-316273.3.peg.2709                                                                                   |
| fig 6666666.28482.peg.3329 | Contig_35 | 78761 | 81562 | + | Adenine-specific DNA methylase containing a Zn-ribbon     | FIG00778850 | ff                                                                                                           |
| fig 6666666.28482.peg.3330 | Contig_35 | 81564 | 84887 | + | FIG00863870: hypothetical protein                         | FIG01495633 | ff                                                                                                           |
| fig 6666666.28482.peg.3331 | Contig_35 | 87597 | 87469 | - | hypothetical protein                                      |             |                                                                                                              |
| fig 6666666.28482.peg.3332 | Contig_35 | 88078 | 87626 | - | FIG00828583: hypothetical protein                         | FIG00828580 | ff                                                                                                           |
| fig 6666666.28482.peg.3333 | Contig_35 | 88166 | 89437 | + | cytochrome P450 superfamily protein                       | FIG01486212 | ff                                                                                                           |
| fig 6666666.28482.peg.3334 | Contig_35 | 89445 | 90284 | + | hypothetical protein                                      |             |                                                                                                              |
| fig 6666666.28482.peg.3335 | Contig_35 | 91677 | 90268 | - | secreted protein                                          |             |                                                                                                              |
| fig 6666666.28482.peg.3336 | Contig_35 | 91803 | 92657 | + | FIG00826817: hypothetical protein                         | FIG00826813 | ff                                                                                                           |
| fig 6666666.28482.peg.3337 | Contig_35 | 93265 | 92729 | - | Glyoxalase family protein                                 |             |                                                                                                              |
| fig 6666666.28482.peg.3338 | Contig_35 | 93967 | 93290 | - | short-chain dehydrogenase/reductase SDR                   |             |                                                                                                              |
| fig 6666666.28482.peg.3339 | Contig_35 | 94976 | 94083 | - | hypothetical protein                                      | FIG00638284 | ff                                                                                                           |

|                            |           |       |       |   |                                                                     |             |                                                                                                                                                            |
|----------------------------|-----------|-------|-------|---|---------------------------------------------------------------------|-------------|------------------------------------------------------------------------------------------------------------------------------------------------------------|
| fig 6666666.28482.peg.3340 | Contig_35 | 95268 | 95858 | + | transcriptional regulator,<br>XRE family with cupin<br>sensor       |             |                                                                                                                                                            |
| fig 6666666.28482.peg.3341 | Contig_35 | 96093 | 96335 | + | hypothetical protein                                                |             |                                                                                                                                                            |
| fig 6666666.28482.peg.3342 | Contig_35 | 96577 | 97956 | + | Probable dehydrogenase                                              | FIG00821376 | ff                                                                                                                                                         |
| fig 6666666.28482.peg.3343 | Contig_35 | 99317 | 97953 | - | serine/threonine protein<br>kinase                                  |             |                                                                                                                                                            |
| fig 6666666.28482.peg.3344 | Contig_36 | 900   | 139   | - | cutinase Cut1                                                       | FIG01392700 | ff                                                                                                                                                         |
| fig 6666666.28482.peg.3345 | Contig_36 | 1140  | 2060  | + | Enoyl-[acyl-carrier-<br>protein] reductase<br>[NADPH] (EC 1.3.1.10) | FIG00032108 | idu(2);Fatty_Acid_Biosynthesis_FASII                                                                                                                       |
| fig 6666666.28482.peg.3346 | Contig_36 | 2057  | 3637  | + | Long-chain-fatty-acid--<br>CoA ligase (EC 6.2.1.3)                  | FIG00018699 | idu(72);n-<br>Phenylalkanoic_acid_degradation<br>idu(72);Fatty_acid_metabolism_clust<br>er idu(72);Biotin_synthesis_cluster<br>idu(72);Biotin_biosynthesis |
| fig 6666666.28482.peg.3347 | Contig_36 | 8477  | 3645  | - | Probable cation-<br>transporting ATPase I (EC<br>3.6.3.-)           | FIG00826871 | ff                                                                                                                                                         |
| fig 6666666.28482.peg.3348 | Contig_36 | 8553  | 8915  | + | hypothetical protein                                                |             |                                                                                                                                                            |
| fig 6666666.28482.peg.3349 | Contig_36 | 9495  | 9121  | - | FIG00824993:<br>hypothetical protein                                | FIG00824992 | ff                                                                                                                                                         |
| fig 6666666.28482.peg.3350 | Contig_36 | 9563  | 10420 | + | FIG056164: rhomboid<br>family serine protease                       | FIG00447744 | isu;Peptidyl-prolyl_cis-<br>trans_isomerase_containing_cluster                                                                                             |
| fig 6666666.28482.peg.3351 | Contig_36 | 10417 | 10878 | + | FIG00823811:<br>hypothetical protein                                | FIG00823809 | ff                                                                                                                                                         |

|                            |           |       |       |   |                                                   |             |                                                                                                                                                                                  |
|----------------------------|-----------|-------|-------|---|---------------------------------------------------|-------------|----------------------------------------------------------------------------------------------------------------------------------------------------------------------------------|
| fig 6666666.28482.peg.3352 | Contig_36 | 12051 | 10891 | - | Alcohol dehydrogenase (EC 1.1.1.1)                | FIG01007502 | icw(1);Glycerolipid_and_Glycerophospholipid_Metabolism_in_Bacteria<br>icw(1);Fermentations:_Mixed_acid<br>icw(1);Butanol_Biosynthesis                                            |
| fig 6666666.28482.peg.3353 | Contig_36 | 13727 | 12048 | - | Long-chain-fatty-acid--CoA ligase (EC 6.2.1.3)    | FIG00018699 | idu(72);n-Phenylalkanoic_acid_degradation<br>idu(72);Fatty_acid_metabolism_cluster<br>idu(72);Biotin_synthesis_cluster<br>idu(72);Biotin_biosynthesis                            |
| fig 6666666.28482.peg.3354 | Contig_36 | 14926 | 13730 | - | hypothetical protein                              | FIG00638284 | ff                                                                                                                                                                               |
| fig 6666666.28482.peg.3355 | Contig_36 | 15921 | 14938 | - | Alcohol dehydrogenase (EC 1.1.1.1)                | FIG01007502 | icw(1);Glycerolipid_and_Glycerophospholipid_Metabolism_in_Bacteria<br>icw(1);Fermentations:_Mixed_acid<br>icw(1);Butanol_Biosynthesis                                            |
| fig 6666666.28482.peg.3356 | Contig_36 | 17359 | 15929 | - | Aldehyde dehydrogenase (EC 1.2.1.3)               | FIG01292786 | idu(16);Pyruvate_metabolism_II:_acetyl-CoA,_acetogenesis_from_pyruvate<br>icw(1);Glycerolipid_and_Glycerophospholipid_Metabolism_in_Bacteria<br>idu(16);Methylglyoxal_Metabolism |
| fig 6666666.28482.peg.3357 | Contig_36 | 19094 | 17376 | - | COG0028: Thiamine pyrophosphate-requiring enzymes | FIG00452446 | ff                                                                                                                                                                               |

|                            |           |       |       |   |                                                                                                  |             |                                                                                                                                                       |
|----------------------------|-----------|-------|-------|---|--------------------------------------------------------------------------------------------------|-------------|-------------------------------------------------------------------------------------------------------------------------------------------------------|
| fig 6666666.28482.peg.3358 | Contig_36 | 20317 | 19097 | - | L-carnitine dehydratase/bile acid-inducible protein F (EC 2.8.3.16)                              | FIG00450481 | ff                                                                                                                                                    |
| fig 6666666.28482.peg.3359 | Contig_36 | 21245 | 20310 | - | Short-chain dehydrogenase/reductase SDR                                                          | FIG00546160 | idu(13);CBSS-164757.7.peg.5020<br>idu(13);Transcription_repair_cluster                                                                                |
| fig 6666666.28482.peg.3360 | Contig_36 | 23102 | 21246 | - | Cyclohexanone monooxygenase (EC 1.14.13.22)                                                      | FIG00975774 | ff                                                                                                                                                    |
| fig 6666666.28482.peg.3361 | Contig_36 | 24466 | 23099 | - | Phenylpropionate dioxygenase and related ring-hydroxylating dioxygenases, large terminal subunit | FIG01371907 | ff                                                                                                                                                    |
| fig 6666666.28482.peg.3362 | Contig_36 | 25311 | 24463 | - | 3-oxoacyl-[acyl-carrier protein] reductase (EC 1.1.1.100)                                        | FIG00621114 | idu(38);CBSS-246196.1.peg.364<br>icw(1);CBSS-164757.7.peg.5020<br>idu(38);Fatty_Acid_Biosynthesis_FASII                                               |
| fig 6666666.28482.peg.3363 | Contig_36 | 25497 | 27107 | + | FIG00821196: hypothetical protein                                                                | FIG00821195 | ff                                                                                                                                                    |
| fig 6666666.28482.peg.3364 | Contig_36 | 27107 | 27847 | + | Transcriptional regulator, GntR family                                                           | FIG00621925 | ff                                                                                                                                                    |
| fig 6666666.28482.peg.3365 | Contig_36 | 27858 | 29477 | + | Long-chain-fatty-acid--CoA ligase (EC 6.2.1.3)                                                   | FIG00018699 | idu(72);n-Phenylalkanoic_acid_degradation<br>idu(72);Fatty_acid_metabolism_cluster<br>idu(72);Biotin_synthesis_cluster<br>idu(72);Biotin_biosynthesis |

|                            |           |       |       |   |                                                            |             |                                                                                                                                                       |
|----------------------------|-----------|-------|-------|---|------------------------------------------------------------|-------------|-------------------------------------------------------------------------------------------------------------------------------------------------------|
| fig 6666666.28482.peg.3366 | Contig_36 | 29479 | 30252 | + | Oxidoreductase, short-chain dehydrogenase/reductase family | FIG00824710 | ff                                                                                                                                                    |
| fig 6666666.28482.peg.3367 | Contig_36 | 30249 | 31376 | + | POSSIBLE<br>OXIDOREDUCTASE                                 | FIG00820017 | ff                                                                                                                                                    |
| fig 6666666.28482.peg.3368 | Contig_36 | 31373 | 32542 | + | FIG00824222:<br>hypothetical protein                       | FIG00824221 | ff                                                                                                                                                    |
| fig 6666666.28482.peg.3369 | Contig_36 | 32550 | 33311 | + | FIG00827468:<br>hypothetical protein                       | FIG00827465 | ff                                                                                                                                                    |
| fig 6666666.28482.peg.3370 | Contig_36 | 33336 | 34544 | + | FIG00828474:<br>hypothetical protein                       | FIG00828473 | ff                                                                                                                                                    |
| fig 6666666.28482.peg.3371 | Contig_36 | 34732 | 36729 | + | FIG00822403:<br>hypothetical protein                       | FIG00822402 | ff                                                                                                                                                    |
| fig 6666666.28482.peg.3372 | Contig_36 | 37381 | 36734 | - | O-methyltransferase (EC 2.1.1.-)                           | FIG01366127 | ff                                                                                                                                                    |
| fig 6666666.28482.peg.3373 | Contig_36 | 37938 | 38147 | + | FIG00821503:<br>hypothetical protein                       | FIG00821502 | ff                                                                                                                                                    |
| fig 6666666.28482.peg.3374 | Contig_36 | 38193 | 39959 | + | Manganese transport protein MntH                           | FIG00554286 | ff                                                                                                                                                    |
| fig 6666666.28482.peg.3375 | Contig_36 | 40875 | 39961 | - | FIG00823373:<br>hypothetical protein                       | FIG00823372 | ff                                                                                                                                                    |
| fig 6666666.28482.peg.3376 | Contig_36 | 41020 | 41628 | + | hypothetical protein                                       | FIG00018699 | idu(72);n-Phenylalkanoic_acid_degradation<br>idu(72);Fatty_acid_metabolism_cluster<br>idu(72);Biotin_synthesis_cluster<br>idu(72);Biotin_biosynthesis |
| fig 6666666.28482.peg.3377 | Contig_36 | 41809 | 41639 | - | Long-chain-fatty-acid--CoA ligase (EC 6.2.1.3)             |             |                                                                                                                                                       |
| fig 6666666.28482.peg.3378 | Contig_36 | 42617 | 41862 | - | Possible membrane protein                                  | FIG01121868 | ff                                                                                                                                                    |
| fig 6666666.28482.peg.3379 | Contig_36 | 42887 | 43006 | + | hypothetical protein                                       |             |                                                                                                                                                       |

|                            |           |       |       |   |                                                                 |             |                                                                                                                                                                                                  |
|----------------------------|-----------|-------|-------|---|-----------------------------------------------------------------|-------------|--------------------------------------------------------------------------------------------------------------------------------------------------------------------------------------------------|
| fig 6666666.28482.peg.3380 | Contig_36 | 42990 | 43337 | + | FIG00829031:<br>hypothetical protein                            | FIG00829027 | ff                                                                                                                                                                                               |
| fig 6666666.28482.peg.3381 | Contig_36 | 43399 | 44340 | + | Hydrogen peroxide-<br>inducible genes activator                 | FIG00031825 | idu(1);Oxidative_stress idu(1);LysR-<br>family_proteins_in_Salmonella_enter<br>ica_Typhimurium idu(1);LysR-<br>family_proteins_in_Escherichia_coli<br>idu(1);Thioredoxin-<br>disulfide_reductase |
| fig 6666666.28482.peg.3382 | Contig_36 | 46045 | 44324 | - | Oxalyl-CoA decarboxylase<br>(EC 4.1.1.8)                        | FIG00340853 | isu;Alkaloid_biosynthesis_from_L-<br>lysine                                                                                                                                                      |
| fig 6666666.28482.peg.3383 | Contig_36 | 46252 | 47805 | + | Long-chain-fatty-acid--<br>CoA ligase (EC 6.2.1.3)              | FIG00018699 | idu(72);n-<br>Phenylalkanoic_acid_degradation<br>idu(72);Fatty_acid_metabolism_clust<br>er idu(72);Biotin_synthesis_cluster<br>idu(72);Biotin_biosynthesis                                       |
| fig 6666666.28482.peg.3384 | Contig_36 | 50063 | 47904 | - | Translation elongation<br>factor G-related protein              | FIG00001635 | isu;Translation_elongation_factor_G_<br>family<br>isu;Translation_elongation_factors_b<br>acterial                                                                                               |
| fig 6666666.28482.peg.3385 | Contig_36 | 50657 | 50232 | - | PPOX class F420-<br>dependent enzyme                            | FIG00822235 | ff                                                                                                                                                                                               |
| fig 6666666.28482.peg.3386 | Contig_37 | 161   | 286   | + | hypothetical protein                                            |             |                                                                                                                                                                                                  |
| fig 6666666.28482.peg.3387 | Contig_37 | 888   | 478   | - | Peptide methionine<br>sulfoxide reductase MsrB<br>(EC 1.8.4.12) | FIG00380575 | isu;Peptide_methionine_sulfoxide_re<br>ductase<br>isu;Unknown_carbohydrate_utilizatio<br>n_(cluster_Ydj_)                                                                                        |

|                            |           |       |       |   |                                                                          |             |                                                                                                                                              |
|----------------------------|-----------|-------|-------|---|--------------------------------------------------------------------------|-------------|----------------------------------------------------------------------------------------------------------------------------------------------|
| fig 6666666.28482.peg.3388 | Contig_37 | 2235  | 898   | - | Putative membrane protein Q2 colocalized with Q                          | FIG00010003 | ff                                                                                                                                           |
| fig 6666666.28482.peg.3389 | Contig_37 | 3817  | 2249  | - | FIG00995896: hypothetical protein                                        | FIG00863727 | ff                                                                                                                                           |
| fig 6666666.28482.peg.3390 | Contig_37 | 4588  | 3833  | - | 5-amino-6-(5-phosphoribosylamino)uracil reductase (EC 1.1.1.193) homolog | FIG00995439 | ff                                                                                                                                           |
| fig 6666666.28482.peg.3391 | Contig_37 | 4638  | 5663  | + | putative ATP/GTP-binding integral membrane protein                       | FIG00822128 | ff                                                                                                                                           |
| fig 6666666.28482.peg.3392 | Contig_37 | 6156  | 5620  | - | FIG00820775: hypothetical protein                                        | FIG00820774 | ff                                                                                                                                           |
| fig 6666666.28482.peg.3393 | Contig_37 | 6653  | 6144  | - | Putative alanine and valine rich exported protein                        | FIG01368946 | ff                                                                                                                                           |
| fig 6666666.28482.peg.3394 | Contig_37 | 7412  | 6675  | - | ATP-dependent Clp protease ATP-binding subunit ClpA                      | FIG00014000 | isu;Proteolysis_in_bacteria,_ATP-dependent isu;CBSS-176299.4.peg.1996B isu;ClpAS_cluster                                                     |
| fig 6666666.28482.peg.3395 | Contig_37 | 7512  | 7844  | + | hypothetical protein                                                     |             |                                                                                                                                              |
| fig 6666666.28482.peg.3396 | Contig_37 | 7947  | 9437  | + | sodium/alanine symporter family protein                                  |             |                                                                                                                                              |
| fig 6666666.28482.peg.3397 | Contig_37 | 9660  | 11294 | + | Long-chain-fatty-acid--CoA ligase (EC 6.2.1.3)                           | FIG00018699 | idu(72);n-Phenylalkanoic_acid_degradation idu(72);Fatty_acid_metabolism_cluster idu(72);Biotin_synthesis_cluster idu(72);Biotin_biosynthesis |
| fig 6666666.28482.peg.3398 | Contig_37 | 11512 | 11375 | - | hypothetical protein                                                     |             |                                                                                                                                              |

|                            |           |       |       |   |                                                               |             |                                    |
|----------------------------|-----------|-------|-------|---|---------------------------------------------------------------|-------------|------------------------------------|
| fig 6666666.28482.peg.3399 | Contig_37 | 11670 | 12596 | + | FIG00828625:<br>hypothetical protein                          | FIG00828620 | ff                                 |
| fig 6666666.28482.peg.3400 | Contig_37 | 12673 | 13023 | + | hypothetical protein                                          |             |                                    |
| fig 6666666.28482.peg.3401 | Contig_37 | 13233 | 13030 | - | O-demethylpuromycin-O-<br>methyltransferase(<br>EC:2.1.1.38 ) |             |                                    |
| fig 6666666.28482.peg.3402 | Contig_37 | 13383 | 14012 | + | hypothetical protein                                          |             |                                    |
| fig 6666666.28482.peg.3403 | Contig_37 | 14021 | 14962 | + | Non-heme<br>chloroperoxidase (EC<br>1.11.1.10)                | FIG01225742 | ff                                 |
| fig 6666666.28482.peg.3404 | Contig_37 | 15873 | 14959 | - | Cobalt-zinc-cadmium<br>resistance protein                     | FIG00000207 | isu;Cobalt-zinc-cadmium_resistance |
| fig 6666666.28482.peg.3405 | Contig_37 | 15981 | 17099 | + | FIG00829989:<br>hypothetical protein                          | FIG00829988 | ff                                 |
| fig 6666666.28482.peg.3406 | Contig_37 | 17212 | 17358 | + | hypothetical protein                                          |             |                                    |
| fig 6666666.28482.peg.3407 | Contig_37 | 17369 | 17659 | + | hypothetical protein                                          |             |                                    |
| fig 6666666.28482.peg.3408 | Contig_37 | 17783 | 18085 | + | hypothetical protein                                          |             |                                    |
| fig 6666666.28482.peg.3409 | Contig_37 | 18195 | 18542 | + | hypothetical protein                                          |             |                                    |
| fig 6666666.28482.peg.3410 | Contig_37 | 18636 | 19136 | + | hypothetical protein                                          |             |                                    |
| fig 6666666.28482.peg.3411 | Contig_37 | 19212 | 19496 | + | hypothetical protein                                          |             |                                    |
| fig 6666666.28482.peg.3412 | Contig_37 | 19907 | 19518 | - | hypothetical protein                                          | FIG00638284 | ff                                 |
| fig 6666666.28482.peg.3413 | Contig_37 | 20076 | 20420 | + | hypothetical protein                                          |             |                                    |
| fig 6666666.28482.rna.38   | Contig_37 | 22038 | 21967 | - | tRNA-Val-GAC                                                  |             | isu;tRNAs                          |
| fig 6666666.28482.rna.39   | Contig_37 | 22126 | 22056 | - | tRNA-Cys-GCA                                                  |             | isu;tRNAs                          |
| fig 6666666.28482.rna.40   | Contig_37 | 22228 | 22156 | - | tRNA-Gly-GCC                                                  |             | isu;tRNAs                          |
| fig 6666666.28482.rna.41   | Contig_37 | 22406 | 22477 | + | tRNA-Val-CAC                                                  |             | isu;tRNAs                          |
| fig 6666666.28482.peg.3414 | Contig_37 | 23675 | 22575 | - | Integrase                                                     | FIG01116662 | ff                                 |
| fig 6666666.28482.peg.3415 | Contig_37 | 24762 | 24920 | + | hypothetical protein                                          |             |                                    |
| fig 6666666.28482.peg.3416 | Contig_37 | 25610 | 26212 | + | hypothetical protein                                          |             |                                    |
| fig 6666666.28482.peg.3417 | Contig_37 | 26669 | 26307 | - | Death on curing protein,<br>Doc toxin                         | FIG00021347 | ff                                 |

|                            |           |       |       |   |                                                              |             |                                                                                                                                                                                                                                |
|----------------------------|-----------|-------|-------|---|--------------------------------------------------------------|-------------|--------------------------------------------------------------------------------------------------------------------------------------------------------------------------------------------------------------------------------|
| fig 6666666.28482.peg.3418 | Contig_37 | 28578 | 27076 | - | Long-chain-fatty-acid--<br>CoA ligase (EC 6.2.1.3)           | FIG00018699 | idu(72);n-<br>Phenylalkanoic_acid_degradation<br>idu(72);Fatty_acid_metabolism_clust<br>er idu(72);Biotin_synthesis_cluster<br>idu(72);Biotin_biosynthesis                                                                     |
| fig 6666666.28482.peg.3419 | Contig_37 | 28906 | 28766 | - | hypothetical protein                                         |             |                                                                                                                                                                                                                                |
| fig 6666666.28482.peg.3420 | Contig_37 | 29554 | 30726 | + | Butyryl-CoA<br>dehydrogenase (EC<br>1.3.99.2)                | FIG00009149 | idu(39);Isoleucine_degradation<br>idu(39);Lysine_fermentation<br>idu(39);Butanol_Biosynthesis<br>idu(39);Acetyl-<br>CoA_fermentation_to_Butyrate<br>idu(39);Valine_degradation<br>idu(39);Anaerobic_respiratory_reduc<br>tases |
| fig 6666666.28482.peg.3421 | Contig_37 | 30927 | 31619 | + | Transcriptional regulator,<br>GntR family                    | FIG00621925 | ff                                                                                                                                                                                                                             |
| fig 6666666.28482.peg.3422 | Contig_37 | 31663 | 31812 | + | hypothetical protein                                         |             |                                                                                                                                                                                                                                |
| fig 6666666.28482.peg.3423 | Contig_37 | 33084 | 32026 | - | putative cytochrome<br>P450 hydroxylase                      | FIG00032437 | idu(49);Nitric_oxide_synthase                                                                                                                                                                                                  |
| fig 6666666.28482.peg.3424 | Contig_37 | 34148 | 33516 | - | Putative GntR-family<br>transcriptional regulator            |             |                                                                                                                                                                                                                                |
| fig 6666666.28482.peg.3425 | Contig_37 | 35043 | 36311 | + | L-carnitine<br>dehydratase/bile acid-<br>inducible protein F | FIG01318850 | ff                                                                                                                                                                                                                             |

|                            |           |       |       |   |                                                    |             |                                                                                                                                                            |
|----------------------------|-----------|-------|-------|---|----------------------------------------------------|-------------|------------------------------------------------------------------------------------------------------------------------------------------------------------|
| fig 6666666.28482.peg.3426 | Contig_37 | 38109 | 36589 | - | Long-chain-fatty-acid--<br>CoA ligase (EC 6.2.1.3) | FIG00018699 | idu(72);n-<br>Phenylalkanoic_acid_degradation<br>idu(72);Fatty_acid_metabolism_clust<br>er idu(72);Biotin_synthesis_cluster<br>idu(72);Biotin_biosynthesis |
| fig 6666666.28482.peg.3427 | Contig_37 | 39281 | 38118 | - | Alpha-methylacyl-CoA<br>racemase (EC 5.1.99.4)     | FIG01312689 | ff                                                                                                                                                         |
| fig 6666666.28482.peg.3428 | Contig_37 | 39941 | 39480 | - | MaoC family protein                                | FIG01332817 | ff                                                                                                                                                         |
| fig 6666666.28482.peg.3429 | Contig_37 | 40354 | 39938 | - | hypothetical protein                               |             |                                                                                                                                                            |
| fig 6666666.28482.peg.3430 | Contig_37 | 41466 | 40378 | - | Alcohol dehydrogenase<br>(EC 1.1.1.1)              | FIG01007502 | idu(17);Glycerolipid_and_Glyceropho<br>spholipid_Metabolism_in_Bacteria<br>idu(17);Fermentations:_Mixed_acid<br>idu(17);Butanol_Biosynthesis               |
| fig 6666666.28482.peg.3431 | Contig_37 | 41894 | 41463 | - | Putative uncharacterized<br>protein BCG_1584c      |             |                                                                                                                                                            |

|                             |           |       |       |   |                                                                                   |              |                                                                                                                                                                                                                                                                                                                                                                                                                                                                                                                                                                                                                                                  |
|-----------------------------|-----------|-------|-------|---|-----------------------------------------------------------------------------------|--------------|--------------------------------------------------------------------------------------------------------------------------------------------------------------------------------------------------------------------------------------------------------------------------------------------------------------------------------------------------------------------------------------------------------------------------------------------------------------------------------------------------------------------------------------------------------------------------------------------------------------------------------------------------|
| fig 66666666.28482.peg.3432 | Contig_37 | 43220 | 42072 | - | 3-ketoacyl-CoA thiolase (EC 2.3.1.16) @ Acetyl-CoA acetyltransferase (EC 2.3.1.9) | FIG000000004 | idu(11);CBSS-246196.1.peg.364<br>idu(9);Serine-glyoxylate_cycle<br>idu(11);Serine-glyoxylate_cycle<br>icw(1);n-<br>Phenylalkanoic_acid_degradation<br>idu(9);Ethylmalonyl-<br>CoA_pathway_of_C2_assimilation,_G<br>JO<br>idu(9);Polyhydroxybutyrate_metaboli<br>sm<br>icw(1);Polyhydroxybutyrate_metaboli<br>sm icw(1);Isoleucine_degradation<br>icw(1);Fatty_acid_metabolism_cluste<br>r idu(11);Biotin_synthesis_cluster<br>idu(11);Biotin_biosynthesis<br>icw(1);Lysine_fermentation<br>idu(9);Isoprenoid_Biosynthesis<br>icw(2);Butanol_Biosynthesis<br>icw(1);Acetyl-<br>CoA_fermentation_to_Butyrate<br>icw(1);Butyrate_metabolism_cluster |
|-----------------------------|-----------|-------|-------|---|-----------------------------------------------------------------------------------|--------------|--------------------------------------------------------------------------------------------------------------------------------------------------------------------------------------------------------------------------------------------------------------------------------------------------------------------------------------------------------------------------------------------------------------------------------------------------------------------------------------------------------------------------------------------------------------------------------------------------------------------------------------------------|

|                            |           |       |       |   |                                                       |             |                                                                                                                                                                                                                                                                                                                                                 |
|----------------------------|-----------|-------|-------|---|-------------------------------------------------------|-------------|-------------------------------------------------------------------------------------------------------------------------------------------------------------------------------------------------------------------------------------------------------------------------------------------------------------------------------------------------|
| fig 6666666.28482.peg.3433 | Contig_37 | 44117 | 43254 | - | Enoyl-CoA hydratase (EC 4.2.1.17)                     | FIG00033206 | idu(51);n-Phenylalkanoic_acid_degradation<br>icw(1);Polyhydroxybutyrate_metabolism<br>idu(51);Isoleucine_degradation<br>idu(51);Fatty_acid_metabolism_cluster<br>idu(51);Lysine_fermentation<br>icw(1);Butanol_Biosynthesis<br>idu(51);Acetyl-CoA_fermentation_to_Butyrate<br>idu(51);Valine_degradation<br>idu(51);Butyrate_metabolism_cluster |
| fig 6666666.28482.peg.3434 | Contig_37 | 44445 | 46127 | + | 3-ketoacyl-(acyl-carrier-protein) reductase( EC:1.- ) |             |                                                                                                                                                                                                                                                                                                                                                 |
| fig 6666666.28482.peg.3435 | Contig_37 | 46156 | 47262 | + | putative acyl-CoA dehydrogenase( EC:1.3.99.- )        |             |                                                                                                                                                                                                                                                                                                                                                 |
| fig 6666666.28482.peg.3436 | Contig_37 | 47450 | 47325 | - | hypothetical protein                                  |             |                                                                                                                                                                                                                                                                                                                                                 |
| fig 6666666.28482.peg.3437 | Contig_37 | 47583 | 48266 | + | acyl-CoA dehydrogenase domain protein                 |             |                                                                                                                                                                                                                                                                                                                                                 |
| fig 6666666.28482.peg.3438 | Contig_37 | 48233 | 49864 | + | Long-chain-fatty-acid--CoA ligase (EC 6.2.1.3)        | FIG00018699 | idu(72);n-Phenylalkanoic_acid_degradation<br>idu(72);Fatty_acid_metabolism_cluster<br>idu(72);Biotin_synthesis_cluster<br>idu(72);Biotin_biosynthesis                                                                                                                                                                                           |
| fig 6666666.28482.peg.3439 | Contig_37 | 49864 | 50043 | + | hypothetical protein                                  |             |                                                                                                                                                                                                                                                                                                                                                 |

|                            |           |       |       |   |                                                   |             |                                                                                                                                                                                                                                                                                                                                            |
|----------------------------|-----------|-------|-------|---|---------------------------------------------------|-------------|--------------------------------------------------------------------------------------------------------------------------------------------------------------------------------------------------------------------------------------------------------------------------------------------------------------------------------------------|
| fig 6666666.28482.peg.3440 | Contig_37 | 50046 | 51197 | + | Butyryl-CoA dehydrogenase (EC 1.3.99.2)           | FIG00009149 | idu(39);Isoleucine_degradation<br>idu(39);Lysine_fermentation<br>idu(39);Butanol_Biosynthesis<br>idu(39);Acetyl-CoA_fermentation_to_Butyrate<br>idu(39);Valine_degradation<br>idu(39);Anaerobic_respiratory_reductions                                                                                                                     |
| fig 6666666.28482.peg.3441 | Contig_37 | 51234 | 52013 | + | Enoyl-CoA hydratase (EC 4.2.1.17)                 | FIG00033206 | icw(1);n-Phenylalkanoic_acid_degradation<br>idu(51);Polyhydroxybutyrate_metabolism<br>icw(1);Isoleucine_degradation<br>icw(1);Fatty_acid_metabolism_cluster<br>icw(1);Lysine_fermentation<br>icw(1);Butanol_Biosynthesis<br>icw(1);Acetyl-CoA_fermentation_to_Butyrate<br>icw(1);Valine_degradation<br>idu(51);Butyrate_metabolism_cluster |
| fig 6666666.28482.peg.3442 | Contig_37 | 52355 | 52035 | - | hypothetical protein                              |             |                                                                                                                                                                                                                                                                                                                                            |
| fig 6666666.28482.peg.3443 | Contig_37 | 52614 | 53447 | + | Acyl-CoA thioesterase II (EC 3.1.2.-)             | FIG00002217 | idu(3);Acyl-CoA_thioesterase_II                                                                                                                                                                                                                                                                                                            |
| fig 6666666.28482.peg.3444 | Contig_37 | 54308 | 53478 | - | probable oxidoreductase/Short-chain dehydrogenase | FIG01319309 | ff                                                                                                                                                                                                                                                                                                                                         |
| fig 6666666.28482.peg.3445 | Contig_37 | 55534 | 54305 | - | putative cytochrome P450 hydroxylase              | FIG00032437 | idu(49);Nitric_oxide_synthase                                                                                                                                                                                                                                                                                                              |
| fig 6666666.28482.peg.3446 | Contig_37 | 55715 | 55539 | - | hypothetical protein                              |             |                                                                                                                                                                                                                                                                                                                                            |
| fig 6666666.28482.peg.3447 | Contig_37 | 55998 | 55873 | - | hypothetical protein                              |             |                                                                                                                                                                                                                                                                                                                                            |

|                            |           |       |       |   |                                         |             |                                                                                                                                                                                                                  |
|----------------------------|-----------|-------|-------|---|-----------------------------------------|-------------|------------------------------------------------------------------------------------------------------------------------------------------------------------------------------------------------------------------|
| fig 6666666.28482.peg.3448 | Contig_37 | 57647 | 56499 | - | Butyryl-CoA dehydrogenase (EC 1.3.99.2) | FIG00009149 | icw(2);Isoleucine_degradation<br>icw(2);Lysine_fermentation<br>icw(2);Butanol_Biosynthesis<br>icw(2);Acetyl-CoA_fermentation_to_Butyrate<br>icw(2);Valine_degradation<br>icw(2);Anaerobic_respiratory_reductases |
| fig 6666666.28482.peg.3449 | Contig_37 | 57731 | 57862 | + | hypothetical protein                    | FIG01342845 | ff                                                                                                                                                                                                               |
| fig 6666666.28482.peg.3450 | Contig_37 | 58726 | 57947 | - | 3-hydroxyacyl-CoA dehydrogenase         |             |                                                                                                                                                                                                                  |
| fig 6666666.28482.peg.3451 | Contig_37 | 59860 | 58760 | - | Butyryl-CoA dehydrogenase (EC 1.3.99.2) | FIG00009149 | icw(2);Isoleucine_degradation<br>icw(2);Lysine_fermentation<br>icw(2);Butanol_Biosynthesis<br>icw(2);Acetyl-CoA_fermentation_to_Butyrate<br>icw(2);Valine_degradation<br>icw(2);Anaerobic_respiratory_reductases |
| fig 6666666.28482.peg.3452 | Contig_37 | 61005 | 59857 | - | Butyryl-CoA dehydrogenase (EC 1.3.99.2) | FIG00009149 | icw(2);Isoleucine_degradation<br>icw(2);Lysine_fermentation<br>icw(2);Butanol_Biosynthesis<br>icw(2);Acetyl-CoA_fermentation_to_Butyrate<br>icw(2);Valine_degradation<br>icw(2);Anaerobic_respiratory_reductases |
| fig 6666666.28482.peg.3453 | Contig_37 | 61211 | 61002 | - | hypothetical protein                    |             |                                                                                                                                                                                                                  |
| fig 6666666.28482.peg.3454 | Contig_38 | 1533  | 658   | - | putative oxidoreductase YdbC( EC:1.- )  |             |                                                                                                                                                                                                                  |
| fig 6666666.28482.peg.3455 | Contig_38 | 1557  | 2057  | + | FIG037376: hypothetical protein         | FIG00821243 | ff                                                                                                                                                                                                               |

|                            |           |       |       |   |                                                                         |             |                               |
|----------------------------|-----------|-------|-------|---|-------------------------------------------------------------------------|-------------|-------------------------------|
| fig 6666666.28482.peg.3456 | Contig_38 | 3002  | 2061  | - | 2-nitropropane<br>dioxygenase (EC<br>1.13.11.32)                        | FIG01304356 | idu(5);CBSS-164757.7.peg.5020 |
| fig 6666666.28482.peg.3457 | Contig_38 | 3351  | 3007  | - | FIG00821167:<br>hypothetical protein                                    | FIG00821164 | ff                            |
| fig 6666666.28482.peg.3458 | Contig_38 | 3807  | 3382  | - | Possible membrane<br>protein                                            | FIG01121868 | ff                            |
| fig 6666666.28482.peg.3459 | Contig_38 | 4460  | 3804  | - | Putative transcriptional<br>regulatory protein                          | FIG01331484 | ff                            |
| fig 6666666.28482.peg.3460 | Contig_38 | 4591  | 4475  | - | hypothetical protein                                                    |             |                               |
| fig 6666666.28482.peg.3461 | Contig_38 | 4748  | 5638  | + | Universal stress protein<br>family                                      | FIG00017615 | ff                            |
| fig 6666666.28482.peg.3462 | Contig_38 | 6432  | 5635  | - | hypothetical protein                                                    | FIG00638284 | ff                            |
| fig 6666666.28482.peg.3463 | Contig_38 | 7242  | 6451  | - | Universal stress protein<br>family                                      | FIG00017615 | ff                            |
| fig 6666666.28482.peg.3464 | Contig_38 | 8418  | 7267  | - | Probable conserved<br>transmembrane alanine<br>and leucine rich protein |             |                               |
| fig 6666666.28482.peg.3465 | Contig_38 | 9062  | 8454  | - | hypothetical protein                                                    |             |                               |
| fig 6666666.28482.peg.3466 | Contig_38 | 9250  | 9480  | + | hypothetical protein                                                    |             |                               |
| fig 6666666.28482.peg.3467 | Contig_38 | 10874 | 9477  | - | Diacylglycerol O-<br>acyltransferase (EC<br>2.3.1.20)                   | FIG00831328 | ff                            |
| fig 6666666.28482.peg.3468 | Contig_38 | 12143 | 10893 | - | FIG00821576:<br>hypothetical protein                                    | FIG00821571 | ff                            |
| fig 6666666.28482.peg.3469 | Contig_38 | 12319 | 12591 | + | hypothetical protein                                                    |             |                               |
| fig 6666666.28482.peg.3470 | Contig_38 | 13089 | 12607 | - | Flavodoxin                                                              | FIG00010844 | isu;Flavodoxin                |

|                            |           |       |       |   |                                                                   |             |                                                                                                                                                            |
|----------------------------|-----------|-------|-------|---|-------------------------------------------------------------------|-------------|------------------------------------------------------------------------------------------------------------------------------------------------------------|
| fig 6666666.28482.peg.3471 | Contig_38 | 13204 | 15042 | + | Long-chain-fatty-acid--<br>CoA ligase (EC 6.2.1.3)                | FIG00018699 | idu(72);n-<br>Phenylalkanoic_acid_degradation<br>idu(72);Fatty_acid_metabolism_clust<br>er idu(72);Biotin_synthesis_cluster<br>idu(72);Biotin_biosynthesis |
| fig 6666666.28482.peg.3472 | Contig_38 | 15352 | 15071 | - | hypothetical protein                                              |             |                                                                                                                                                            |
| fig 6666666.28482.peg.3473 | Contig_38 | 15528 | 15388 | - | hypothetical protein                                              |             |                                                                                                                                                            |
| fig 6666666.28482.peg.3474 | Contig_38 | 15617 | 16264 | + | Transcriptional repressor<br>EthR, TetR family                    | FIG01323805 | ff                                                                                                                                                         |
| fig 6666666.28482.peg.3475 | Contig_38 | 17477 | 16251 | - | 3-carboxy-cis,cis-<br>muconate<br>cycloisomerase (EC<br>5.5.1.2)  | FIG00001777 | icw(2);Protocatechuate_branch_of_b<br>eta-ketoadipate_pathway                                                                                              |
| fig 6666666.28482.peg.3476 | Contig_38 | 17992 | 17474 | - | Protocatechuate 3,4-<br>dioxygenase alpha chain<br>(EC 1.13.11.3) | FIG00138292 | icw(1);Protocatechuate_branch_of_b<br>eta-ketoadipate_pathway                                                                                              |
| fig 6666666.28482.peg.3477 | Contig_38 | 18740 | 17985 | - | Protocatechuate 3,4-<br>dioxygenase beta chain<br>(EC 1.13.11.3)  | FIG00001681 | isu;Protocatechuate_branch_of_beta-<br>ketoadipate_pathway                                                                                                 |
| fig 6666666.28482.peg.3478 | Contig_38 | 18947 | 20272 | + | Phthalate 3,4-<br>dioxygenase alpha<br>subunit                    | FIG00171655 | isu;Dioxygenases_(EC_1.14.12.-)                                                                                                                            |
| fig 6666666.28482.peg.3479 | Contig_38 | 20269 | 20787 | + | Aromatic-ring-<br>hydroxylating<br>dioxygenase, beta<br>subunit   | FIG00143547 | isu;Aromatic_dioxygenase_mess<br>icw(1);Dioxygenases_(EC_1.14.12.-)                                                                                        |
| fig 6666666.28482.peg.3480 | Contig_38 | 20784 | 21011 | + | dihydrodiol<br>dehydrogenase                                      |             |                                                                                                                                                            |

|                            |           |       |       |   |                                                                                              |             |                                                                                                                           |
|----------------------------|-----------|-------|-------|---|----------------------------------------------------------------------------------------------|-------------|---------------------------------------------------------------------------------------------------------------------------|
| fig 6666666.28482.peg.3481 | Contig_38 | 21008 | 21802 | + | Dihydrodiol dehydrogenase (EC 1.3.1.56)                                                      | FIG00136718 | isu;Biphenyl_Degradation                                                                                                  |
| fig 6666666.28482.peg.3482 | Contig_38 | 21799 | 22524 | + | COG1720: Uncharacterized conserved protein                                                   | FIG00001872 | ff                                                                                                                        |
| fig 6666666.28482.peg.3483 | Contig_38 | 22580 | 23428 | + | FIG00825125: hypothetical protein                                                            | FIG00825124 | ff                                                                                                                        |
| fig 6666666.28482.peg.3484 | Contig_38 | 24236 | 23436 | - | Transcriptional regulator, lclR family                                                       | FIG00022569 | idu(12);Homogentisate_pathway_of_aromatic_compound_degradation                                                            |
| fig 6666666.28482.peg.3485 | Contig_38 | 25330 | 24263 | - | hypothetical protein                                                                         | FIG00638284 | ff                                                                                                                        |
| fig 6666666.28482.peg.3486 | Contig_38 | 25447 | 26277 | + | FIG00824233: hypothetical protein                                                            | FIG00824231 | ff                                                                                                                        |
| fig 6666666.28482.peg.3487 | Contig_38 | 26274 | 26933 | + | DedA protein                                                                                 | FIG00002761 | idu(1);Uptake_of_selenate_and_selenite<br>idu(1);DedA_family_of_inner_membrane_proteins                                   |
| fig 6666666.28482.peg.3488 | Contig_38 | 27706 | 27086 | - | Transcriptional regulator, TetR family                                                       | FIG00554417 | ff                                                                                                                        |
| fig 6666666.28482.peg.3489 | Contig_38 | 27862 | 28299 | + | Anti-sigma F factor antagonist (spolI <sup>AA</sup> -2); Anti-sigma B factor antagonist RsbV | FIG00722824 | idu(5);SigmaB_stress_response_regulation<br>idu(5);SigmaB_stress_response_cluster_1                                       |
| fig 6666666.28482.peg.3490 | Contig_38 | 28334 | 29419 | + | Putative cytoplasmic protein                                                                 | FIG00904518 | ff                                                                                                                        |
| fig 6666666.28482.peg.3491 | Contig_38 | 30176 | 29406 | - | FIG00823196: hypothetical protein                                                            | FIG00823195 | ff                                                                                                                        |
| fig 6666666.28482.peg.3492 | Contig_38 | 31136 | 30213 | - | Catalase (EC 1.11.1.6)                                                                       | FIG00000313 | idu(3);Oxidative_stress<br>idu(3);Photorespiration_(oxidative_C2_cycle)<br>idu(3);Protection_from_Reactive_Oxygen_Species |

|                            |           |       |       |   |                                                |             |                                                                                                                                              |
|----------------------------|-----------|-------|-------|---|------------------------------------------------|-------------|----------------------------------------------------------------------------------------------------------------------------------------------|
| fig 6666666.28482.peg.3493 | Contig_38 | 31942 | 31154 | - | Short chain membrane-associated dehydrogenase  | FIG00821400 | ff                                                                                                                                           |
| fig 6666666.28482.peg.3494 | Contig_38 | 32687 | 32085 | - | protein of unknown function DUF1470            |             |                                                                                                                                              |
| fig 6666666.28482.peg.3495 | Contig_38 | 32753 | 33682 | + | hypothetical protein                           | FIG00638284 | ff                                                                                                                                           |
| fig 6666666.28482.peg.3496 | Contig_38 | 33699 | 35231 | + | Long-chain-fatty-acid--CoA ligase (EC 6.2.1.3) | FIG00018699 | idu(72);n-Phenylalkanoic_acid_degradation idu(72);Fatty_acid_metabolism_cluster idu(72);Biotin_synthesis_cluster idu(72);Biotin_biosynthesis |
| fig 6666666.28482.peg.3497 | Contig_38 | 35224 | 36012 | + | hypothetical protein                           | FIG00638284 | ff                                                                                                                                           |
| fig 6666666.28482.peg.3498 | Contig_38 | 36834 | 36007 | - | Naphthoate synthase (EC 4.1.3.36)              | FIG00071623 | idu(2);Menaquinone_and_Phylloquinone_Biosynthesis_--_gjo idu(2);Menaquinone_and_Phylloquinone_Biosynthesis                                   |
| fig 6666666.28482.peg.3499 | Contig_38 | 37183 | 36890 | - | FIG00828916: hypothetical protein              | FIG00828915 | ff                                                                                                                                           |
| fig 6666666.28482.peg.3500 | Contig_38 | 37573 | 37854 | + | WhiB-type transcription regulator              | FIG00019991 | idu(2);WhiB_and_WhiB-type_regulatory_proteins_                                                                                               |
| fig 6666666.28482.peg.3501 | Contig_38 | 38511 | 37915 | - | Transcriptional regulator, TetR family         | FIG00554417 | ff                                                                                                                                           |
| fig 6666666.28482.peg.3502 | Contig_38 | 41380 | 38516 | - | membrane protein, MmpL family (mmpL4)          | FIG01318281 | ff                                                                                                                                           |
| fig 6666666.28482.peg.3503 | Contig_38 | 41814 | 41377 | - | membrane protein, MmpS family                  | FIG01309473 | ff                                                                                                                                           |
| fig 6666666.28482.peg.3504 | Contig_38 | 42025 | 42225 | + | hypothetical protein                           |             |                                                                                                                                              |
| fig 6666666.28482.peg.3505 | Contig_38 | 43374 | 43853 | + | hypothetical protein                           |             |                                                                                                                                              |
| fig 6666666.28482.peg.3506 | Contig_38 | 43910 | 44659 | + | hypothetical protein                           |             |                                                                                                                                              |
| fig 6666666.28482.peg.3507 | Contig_38 | 45052 | 44936 | - | hypothetical protein                           |             |                                                                                                                                              |
| fig 6666666.28482.peg.3508 | Contig_38 | 45428 | 45541 | + | hypothetical protein                           |             |                                                                                                                                              |

|                            |           |       |       |   |                                                    |                                                                                                                                                                                                                                                                                                                                                            |
|----------------------------|-----------|-------|-------|---|----------------------------------------------------|------------------------------------------------------------------------------------------------------------------------------------------------------------------------------------------------------------------------------------------------------------------------------------------------------------------------------------------------------------|
| fig 6666666.28482.peg.3509 | Contig_38 | 46541 | 46128 | - | hypothetical protein                               |                                                                                                                                                                                                                                                                                                                                                            |
| fig 6666666.28482.peg.3510 | Contig_38 | 47516 | 47391 | - | hypothetical protein                               |                                                                                                                                                                                                                                                                                                                                                            |
| fig 6666666.28482.peg.3511 | Contig_38 | 47877 | 48956 | + | hypothetical protein                               | FIG00638284 ff                                                                                                                                                                                                                                                                                                                                             |
| fig 6666666.28482.peg.3512 | Contig_38 | 48958 | 50613 | + | Serine/threonine-protein kinase pknD (EC 2.7.11.1) |                                                                                                                                                                                                                                                                                                                                                            |
| fig 6666666.28482.peg.3513 | Contig_38 | 50748 | 51779 | + | PE_PGRS family protein                             |                                                                                                                                                                                                                                                                                                                                                            |
| fig 6666666.28482.rna.42   | Contig_38 | 51974 | 51904 | - | tRNA-Pseudo-CAC                                    |                                                                                                                                                                                                                                                                                                                                                            |
| fig 6666666.28482.peg.3514 | Contig_38 | 52913 | 52113 | - | Enoyl-CoA hydratase (EC 4.2.1.17)                  | FIG00033206 icw(1);n-Phenylalkanoic_acid_degradation<br>icw(1);Polyhydroxybutyrate_metabolism<br>idu(51);Isoleucine_degradation<br>icw(1);Fatty_acid_metabolism_cluster<br>idu(51);Lysine_fermentation<br>idu(51);Butanol_Biosynthesis<br>idu(51);Acetyl-CoA_fermentation_to_Butyrate<br>idu(51);Valine_degradation<br>idu(51);Butyrate_metabolism_cluster |
| fig 6666666.28482.peg.3515 | Contig_38 | 53200 | 52910 | - | FIG00820985: hypothetical protein                  | FIG01577081 ff                                                                                                                                                                                                                                                                                                                                             |
| fig 6666666.28482.peg.3516 | Contig_38 | 53526 | 53329 | - | hypothetical protein                               |                                                                                                                                                                                                                                                                                                                                                            |
| fig 6666666.28482.peg.3517 | Contig_38 | 53863 | 54603 | + | regulatory protein GntR, HTH                       | FIG01451455 ff                                                                                                                                                                                                                                                                                                                                             |

|                            |           |       |       |   |                                                                                   |             |                                                                                                                                                                                                                                                                                                                                                                                                                                                                                                                                                                                                                          |
|----------------------------|-----------|-------|-------|---|-----------------------------------------------------------------------------------|-------------|--------------------------------------------------------------------------------------------------------------------------------------------------------------------------------------------------------------------------------------------------------------------------------------------------------------------------------------------------------------------------------------------------------------------------------------------------------------------------------------------------------------------------------------------------------------------------------------------------------------------------|
| fig 6666666.28482.peg.3518 | Contig_38 | 54719 | 55909 | + | 3-ketoacyl-CoA thiolase (EC 2.3.1.16) @ Acetyl-CoA acetyltransferase (EC 2.3.1.9) | FIG00000004 | idu(11);CBSS-246196.1.peg.364<br>idu(9);Serine-glyoxylate_cycle<br>idu(11);Serine-glyoxylate_cycle<br>icw(2);n-Phenylalkanoic_acid_degradation<br>idu(9);Ethylmalonyl-CoA_pathway_of_C2_assimilation,_GJO<br>idu(9);Polyhydroxybutyrate_metabolism<br>icw(1);Polyhydroxybutyrate_metabolism<br>icw(1);Isoleucine_degradation<br>icw(2);Fatty_acid_metabolism_cluster<br>icw(1);Biotin_synthesis_cluster<br>icw(1);Biotin_biosynthesis<br>icw(1);Lysine_fermentation<br>idu(9);Isoprenoid_Biosynthesis<br>icw(1);Butanol_Biosynthesis<br>icw(1);Acetyl-CoA_fermentation_to_Butyrate<br>icw(1);Butyrate_metabolism_cluster |
| fig 6666666.28482.peg.3519 | Contig_38 | 55911 | 56330 | + | hypothetical protein                                                              | FIG00638284 | ff                                                                                                                                                                                                                                                                                                                                                                                                                                                                                                                                                                                                                       |
| fig 6666666.28482.peg.3520 | Contig_38 | 56437 | 58029 | + | Long-chain-fatty-acid--CoA ligase (EC 6.2.1.3)                                    | FIG00018699 | idu(72);n-Phenylalkanoic_acid_degradation<br>idu(72);Fatty_acid_metabolism_cluster<br>idu(72);Biotin_synthesis_cluster<br>idu(72);Biotin_biosynthesis                                                                                                                                                                                                                                                                                                                                                                                                                                                                    |
| fig 6666666.28482.peg.3521 | Contig_38 | 59169 | 58231 | - | hypothetical protein                                                              | FIG00638284 | ff                                                                                                                                                                                                                                                                                                                                                                                                                                                                                                                                                                                                                       |

|                            |           |       |       |   |                                                      |             |                                                                                                                                                                                                                                |
|----------------------------|-----------|-------|-------|---|------------------------------------------------------|-------------|--------------------------------------------------------------------------------------------------------------------------------------------------------------------------------------------------------------------------------|
| fig 6666666.28482.peg.3522 | Contig_38 | 60401 | 59172 | - | Hydroxyproline<br>dehydratase putative               | FIG01390869 | ff                                                                                                                                                                                                                             |
| fig 6666666.28482.peg.3523 | Contig_38 | 61921 | 60425 | - | Aldehyde dehydrogenase<br>(EC 1.2.1.3)               | FIG01292786 | idu(16);Pyruvate_metabolism_II:_ace<br>tyl-<br>CoA,_acetogenesis_from_pyruvate<br>idu(16);Glycerolipid_and_Glyceroph<br>spholipid_Metabolism_in_Bacteria<br>idu(16);Methylglyoxal_Metabolism                                   |
| fig 6666666.28482.peg.3524 | Contig_38 | 63261 | 62092 | - | amidohydrolase 2                                     | FIG00501263 | ff                                                                                                                                                                                                                             |
| fig 6666666.28482.peg.3525 | Contig_38 | 63378 | 63668 | + | hypothetical protein                                 | FIG00638284 | ff                                                                                                                                                                                                                             |
| fig 6666666.28482.peg.3526 | Contig_38 | 63755 | 64969 | + | Transcriptional regulator,<br>TetR family            | FIG00554417 | ff                                                                                                                                                                                                                             |
| fig 6666666.28482.peg.3527 | Contig_38 | 65369 | 66127 | + | PROBABLE<br>DEHYDROGENASE (EC 1.-.-<br>.-)           | FIG01877414 | ff                                                                                                                                                                                                                             |
| fig 6666666.28482.peg.3528 | Contig_38 | 67441 | 66752 | - | Transcriptional regulator,<br>TetR family            | FIG00554417 | ff                                                                                                                                                                                                                             |
| fig 6666666.28482.peg.3529 | Contig_38 | 67554 | 68783 | + | Butyryl-CoA<br>dehydrogenase (EC<br>1.3.99.2)        | FIG00009149 | idu(39);Isoleucine_degradation<br>idu(39);Lysine_fermentation<br>idu(39);Butanol_Biosynthesis<br>idu(39);Acetyl-<br>CoA_fermentation_to_Butyrate<br>idu(39);Valine_degradation<br>idu(39);Anaerobic_respiratory_reduc<br>tases |
| fig 6666666.28482.peg.3530 | Contig_38 | 68802 | 69926 | + | Putative acyl-CoA<br>dehydrogenase(<br>EC:1.3.99.3 ) |             |                                                                                                                                                                                                                                |
| fig 6666666.28482.peg.3531 | Contig_38 | 70274 | 70131 | - | hypothetical protein                                 |             |                                                                                                                                                                                                                                |
| fig 6666666.28482.peg.3532 | Contig_38 | 70900 | 70712 | - | hypothetical protein                                 |             |                                                                                                                                                                                                                                |

|                            |           |       |       |   |                                                                  |             |                                                                                                                                                            |
|----------------------------|-----------|-------|-------|---|------------------------------------------------------------------|-------------|------------------------------------------------------------------------------------------------------------------------------------------------------------|
| fig 6666666.28482.peg.3533 | Contig_38 | 71691 | 75197 | + | Long-chain-fatty-acid--<br>CoA ligase (EC 6.2.1.3)               | FIG00018699 | idu(72);n-<br>Phenylalkanoic_acid_degradation<br>idu(72);Fatty_acid_metabolism_clust<br>er idu(72);Biotin_synthesis_cluster<br>idu(72);Biotin_biosynthesis |
| fig 6666666.28482.peg.3534 | Contig_38 | 75247 | 76146 | + | probable<br>oxidoreductase/Short-<br>chain dehydrogenase         | FIG01319309 | ff                                                                                                                                                         |
| fig 6666666.28482.peg.3535 | Contig_38 | 76797 | 76940 | + | hypothetical protein                                             |             |                                                                                                                                                            |
| fig 6666666.28482.peg.3536 | Contig_38 | 77772 | 76984 | - | hypothetical protein                                             | FIG00638284 | ff                                                                                                                                                         |
| fig 6666666.28482.peg.3537 | Contig_38 | 78563 | 77835 | - | FIG00821219:<br>hypothetical protein                             | FIG00821218 | ff                                                                                                                                                         |
| fig 6666666.28482.peg.3538 | Contig_38 | 80005 | 78527 | - | MCE-family protein<br>Mce1F                                      | FIG00821171 | idu(7);Mycobacterium_virulence_ope<br>ron_MCE_involved_in_cell_invasion                                                                                    |
| fig 6666666.28482.peg.3539 | Contig_38 | 81167 | 80010 | - | MCE-family lipoprotein<br>LprK (MCE-family<br>lipoprotein Mce1e) | FIG00819998 | icw(2);Mycobacterium_virulence_op<br>eron_MCE_involved_in_cell_invasion                                                                                    |
| fig 6666666.28482.peg.3540 | Contig_38 | 82474 | 81164 | - | MCE-family protein<br>Mce1D                                      | FIG00820669 | icw(1);Mycobacterium_virulence_op<br>eron_MCE_involved_in_cell_invasion                                                                                    |
| fig 6666666.28482.peg.3541 | Contig_38 | 83907 | 82498 | - | MCE-family protein<br>Mce1C                                      | FIG00821293 | icw(7);Mycobacterium_virulence_op<br>eron_MCE_involved_in_cell_invasion                                                                                    |
| fig 6666666.28482.peg.3542 | Contig_38 | 84932 | 83904 | - | MCE-family protein<br>Mce1B                                      | FIG00763551 | icw(5);Mycobacterium_virulence_op<br>eron_MCE_involved_in_cell_invasion                                                                                    |
| fig 6666666.28482.peg.3543 | Contig_38 | 86454 | 84973 | - | MCE-family protein<br>Mce1A                                      | FIG00820494 | icw(2);Mycobacterium_virulence_op<br>eron_MCE_involved_in_cell_invasion                                                                                    |

|                            |           |       |       |   |                                                               |             |                                                                                                                                                            |
|----------------------------|-----------|-------|-------|---|---------------------------------------------------------------|-------------|------------------------------------------------------------------------------------------------------------------------------------------------------------|
| fig 6666666.28482.peg.3544 | Contig_38 | 87278 | 86460 | - | Conserved hypothetical<br>integral membrane<br>protein YrbE1B | FIG00691621 | icw(2);Mycobacterium_virulence_op<br>eron_MCE_involved_in_cell_invasion                                                                                    |
| fig 6666666.28482.peg.3545 | Contig_38 | 88105 | 87311 | - | Conserved hypothetical<br>integral membrane<br>protein YrbE1A | FIG00690583 | idu(7);Mycobacterium_virulence_ope<br>ron_MCE_involved_in_cell_invasion                                                                                    |
| fig 6666666.28482.peg.3546 | Contig_38 | 89458 | 90147 | + | Transcriptional regulator, TetR family                        | FIG00554417 | ff                                                                                                                                                         |
| fig 6666666.28482.peg.3547 | Contig_38 | 90518 | 90838 | + | hypothetical protein                                          |             |                                                                                                                                                            |
| fig 6666666.28482.peg.3548 | Contig_38 | 91208 | 90942 | - | FIG00820120:<br>hypothetical protein                          | FIG00820119 | ff                                                                                                                                                         |
| fig 6666666.28482.peg.3549 | Contig_38 | 91434 | 92078 | + | hypothetical protein                                          | FIG00638284 | ff                                                                                                                                                         |
| fig 6666666.28482.peg.3550 | Contig_38 | 92369 | 92566 | + | Putative ferredoxin                                           | FIG00820674 | ff                                                                                                                                                         |
| fig 6666666.28482.peg.3551 | Contig_38 | 94333 | 92660 | - | Long-chain-fatty-acid--<br>CoA ligase (EC 6.2.1.3)            | FIG00018699 | idu(72);n-<br>Phenylalkanoic_acid_degradation<br>idu(72);Fatty_acid_metabolism_clust<br>er idu(72);Biotin_synthesis_cluster<br>idu(72);Biotin_biosynthesis |
| fig 6666666.28482.peg.3552 | Contig_38 | 95164 | 94340 | - | phospholipid/glycerol<br>acyltransferase                      |             |                                                                                                                                                            |
| fig 6666666.28482.peg.3553 | Contig_38 | 96596 | 95319 | - | protein of unknown<br>function UPF0089                        |             |                                                                                                                                                            |
| fig 6666666.28482.peg.3554 | Contig_38 | 97827 | 96958 | - | hypothetical protein                                          |             |                                                                                                                                                            |
| fig 6666666.28482.peg.3555 | Contig_38 | 98392 | 98207 | - | hypothetical protein                                          |             |                                                                                                                                                            |
| fig 6666666.28482.peg.3556 | Contig_38 | 98771 | 98583 | - | L-carnitine<br>dehydratase/bile acid-<br>inducible protein F  |             |                                                                                                                                                            |
| fig 6666666.28482.peg.3557 | Contig_38 | 98860 | 99012 | + | hypothetical protein                                          |             |                                                                                                                                                            |

|                            |           |        |        |   |                                                                                                                              |                                                                                                                   |
|----------------------------|-----------|--------|--------|---|------------------------------------------------------------------------------------------------------------------------------|-------------------------------------------------------------------------------------------------------------------|
| fig 6666666.28482.peg.3558 | Contig_38 | 100276 | 99182  | - | Acyl-CoA dehydrogenase,<br>C-terminal:Acyl-CoA<br>dehydrogenase, central<br>region:Acyl-CoA<br>dehydrogenase, N-<br>terminal |                                                                                                                   |
| fig 6666666.28482.peg.3559 | Contig_38 | 101244 | 100639 | - | Transcriptional regulator, TetR family                                                                                       | FIG00554417 ff                                                                                                    |
| fig 6666666.28482.peg.3560 | Contig_38 | 101404 | 102639 | + | BarH                                                                                                                         | FIG00668014 ff                                                                                                    |
| fig 6666666.28482.peg.3561 | Contig_38 | 103012 | 103509 | + | hydrolase, alpha/beta<br>fold family protein,<br>putative                                                                    |                                                                                                                   |
| fig 6666666.28482.peg.3562 | Contig_38 | 103613 | 103873 | + | BarH                                                                                                                         | FIG00668014 ff                                                                                                    |
| fig 6666666.28482.peg.3563 | Contig_38 | 103953 | 104792 | + | short-chain<br>dehydrogenase/reductas<br>e SDR                                                                               |                                                                                                                   |
| fig 6666666.28482.peg.3564 | Contig_38 | 105002 | 105739 | + | regulatory protein GntR,<br>HTH                                                                                              | FIG01451455 ff                                                                                                    |
| fig 6666666.28482.peg.3565 | Contig_38 | 105793 | 106572 | + | hypothetical protein                                                                                                         |                                                                                                                   |
| fig 6666666.28482.peg.3566 | Contig_38 | 107045 | 106587 | - | Acyl dehydratase                                                                                                             | FIG01303815 idu(2);CBSS-246196.1.peg.364                                                                          |
| fig 6666666.28482.peg.3567 | Contig_38 | 107893 | 107168 | - | Putative GntR-family<br>transcriptional regulator                                                                            |                                                                                                                   |
| fig 6666666.28482.peg.3568 | Contig_38 | 108043 | 109080 | + | PROBABLE<br>OXIDOREDUCTASE                                                                                                   | FIG01416034 ff                                                                                                    |
| fig 6666666.28482.peg.3569 | Contig_38 | 109164 | 109601 | + | hypothetical protein                                                                                                         |                                                                                                                   |
| fig 6666666.28482.peg.3570 | Contig_38 | 109794 | 109955 | + | hypothetical protein                                                                                                         |                                                                                                                   |
| fig 6666666.28482.peg.3571 | Contig_38 | 110098 | 110853 | + | 3-oxoacyl-[acyl-carrier<br>protein] reductase (EC<br>1.1.1.100)                                                              | FIG00621114 icw(2);CBSS-246196.1.peg.364<br>icw(1);CBSS-164757.7.peg.5020<br>icw(1);Fatty_Acid_Biosynthesis_FASII |

|                            |           |        |        |   |                                                           |             |                                                                                                                                                                                                                                                                                                                                          |
|----------------------------|-----------|--------|--------|---|-----------------------------------------------------------|-------------|------------------------------------------------------------------------------------------------------------------------------------------------------------------------------------------------------------------------------------------------------------------------------------------------------------------------------------------|
| fig 6666666.28482.peg.3572 | Contig_38 | 111873 | 110950 | - | 3-oxoacyl-[acyl-carrier protein] reductase (EC 1.1.1.100) | FIG00621114 | icw(2);CBSS-246196.1.peg.364<br>icw(1);CBSS-164757.7.peg.5020<br>icw(1);Fatty_Acid_Biosynthesis_FASII                                                                                                                                                                                                                                    |
| fig 6666666.28482.peg.3573 | Contig_38 | 112270 | 113088 | + | Enoyl-CoA hydratase (EC 4.2.1.17)                         | FIG00033206 | icw(1);n-Phenylalkanoic_acid_degradation<br>icw(1);Polyhydroxybutyrate_metabolism<br>icw(2);Isoleucine_degradation<br>icw(1);Fatty_acid_metabolism_cluster<br>icw(2);Lysine_fermentation<br>icw(2);Butanol_Biosynthesis<br>icw(2);Acetyl-CoA_fermentation_to_Butyrate<br>icw(2);Valine_degradation<br>icw(1);Butyrate_metabolism_cluster |

|                            |           |        |        |   |                                          |             |                                                                                                                                                                                                                                                                                                                                          |
|----------------------------|-----------|--------|--------|---|------------------------------------------|-------------|------------------------------------------------------------------------------------------------------------------------------------------------------------------------------------------------------------------------------------------------------------------------------------------------------------------------------------------|
| fig 6666666.28482.peg.3574 | Contig_38 | 113133 | 113867 | + | Enoyl-CoA hydratase (EC 4.2.1.17)        | FIG00033206 | icw(1);n-Phenylalkanoic_acid_degradation<br>icw(1);Polyhydroxybutyrate_metabolism<br>icw(2);Isoleucine_degradation<br>icw(1);Fatty_acid_metabolism_cluster<br>icw(2);Lysine_fermentation<br>icw(2);Butanol_Biosynthesis<br>icw(2);Acetyl-CoA_fermentation_to_Butyrate<br>icw(2);Valine_degradation<br>icw(1);Butyrate_metabolism_cluster |
| fig 6666666.28482.peg.3575 | Contig_38 | 114209 | 115363 | + | Nonspecific lipid-transfer protein       | FIG00828344 | ff                                                                                                                                                                                                                                                                                                                                       |
| fig 6666666.28482.peg.3576 | Contig_38 | 115847 | 116869 | + | Butyryl-CoA dehydrogenase (EC 1.3.99.2)  | FIG00009149 | idu(39);Isoleucine_degradation<br>idu(39);Lysine_fermentation<br>idu(39);Butanol_Biosynthesis<br>idu(39);Acetyl-CoA_fermentation_to_Butyrate<br>idu(39);Valine_degradation<br>idu(39);Anaerobic_respiratory_reductases                                                                                                                   |
| fig 6666666.28482.peg.3577 | Contig_38 | 116866 | 117999 | + | putative acyl-CoA dehydrogenase          |             |                                                                                                                                                                                                                                                                                                                                          |
| fig 6666666.28482.peg.3578 | Contig_38 | 118029 | 119183 | + | 4-hydroxybutyrate coenzyme A transferase | FIG00945012 | ff                                                                                                                                                                                                                                                                                                                                       |
| fig 6666666.28482.peg.3579 | Contig_38 | 119216 | 119461 | + | short-chain dehydrogenase/reductase SDR  |             |                                                                                                                                                                                                                                                                                                                                          |

|                            |           |        |        |   |                                                                                                         |             |                                                                                                                                                                                                                                                                                                                          |
|----------------------------|-----------|--------|--------|---|---------------------------------------------------------------------------------------------------------|-------------|--------------------------------------------------------------------------------------------------------------------------------------------------------------------------------------------------------------------------------------------------------------------------------------------------------------------------|
| fig 6666666.28482.peg.3580 | Contig_38 | 119647 | 120831 | + | putative acyl-CoA dehydrogenase                                                                         | FIG00476656 | ff                                                                                                                                                                                                                                                                                                                       |
| fig 6666666.28482.peg.3581 | Contig_38 | 120828 | 121820 | + | Isovaleryl-CoA dehydrogenase (EC 1.3.99.10); Acyl-CoA dehydrogenase, short-chain specific (EC 1.3.99.2) | FIG00340338 | icw(1);Isoleucine_degradation idu(5);HMG_CoA_Synthesis idu(5);Leucine_Degradation_and_HMG-CoA_Metabolism                                                                                                                                                                                                                 |
| fig 6666666.28482.peg.3582 | Contig_38 | 122774 | 121959 | - | Enoyl-CoA hydratase (EC 4.2.1.17)                                                                       | FIG00033206 | idu(51);n-Phenylalkanoic_acid_degradation idu(51);Polyhydroxybutyrate_metabolism icw(1);Isoleucine_degradation idu(51);Fatty_acid_metabolism_cluster idu(51);Lysine_fermentation idu(51);Butanol_Biosynthesis idu(51);Acetyl-CoA_fermentation_to_Butyrate idu(51);Valine_degradation idu(51);Butyrate_metabolism_cluster |
| fig 6666666.28482.peg.3583 | Contig_38 | 123951 | 122791 | - | Acetyl-CoA acetyltransferase                                                                            | FIG01005417 | ff                                                                                                                                                                                                                                                                                                                       |
| fig 6666666.28482.peg.3584 | Contig_39 | 47     | 760    | + | NADH-ubiquinone oxidoreductase chain G (EC 1.6.5.3)                                                     | FIG00010922 | icw(5);Respiratory_Complex_I icw(5);NADH_ubiquinone_oxidoreductase                                                                                                                                                                                                                                                       |
| fig 6666666.28482.peg.3585 | Contig_39 | 757    | 2028   | + | NADH-ubiquinone oxidoreductase chain H (EC 1.6.5.3)                                                     | FIG00133041 | icw(3);Respiratory_Complex_I icw(3);NADH_ubiquinone_oxidoreductase                                                                                                                                                                                                                                                       |

|                            |           |       |       |   |                                                                                   |             |                                                                           |
|----------------------------|-----------|-------|-------|---|-----------------------------------------------------------------------------------|-------------|---------------------------------------------------------------------------|
| fig 6666666.28482.peg.3586 | Contig_39 | 2021  | 2566  | + | NADH-ubiquinone<br>oxidoreductase chain I<br>(EC 1.6.5.3)                         | FIG00138210 | icw(4);Respiratory_Complex_I<br>icw(4);NADH_ubiquinone_oxidoreduc<br>tase |
| fig 6666666.28482.peg.3587 | Contig_39 | 2563  | 3363  | + | NADH-ubiquinone<br>oxidoreductase chain J<br>(EC 1.6.5.3)                         | FIG00000569 | icw(2);Respiratory_Complex_I<br>icw(2);NADH_ubiquinone_oxidoreduc<br>tase |
| fig 6666666.28482.peg.3588 | Contig_39 | 3360  | 3659  | + | NADH-ubiquinone<br>oxidoreductase chain K<br>(EC 1.6.5.3)                         | FIG00000559 | idu(1);Respiratory_Complex_I<br>idu(1);NADH_ubiquinone_oxidoreduc<br>tase |
| fig 6666666.28482.peg.3589 | Contig_39 | 3672  | 5558  | + | NADH-ubiquinone<br>oxidoreductase chain L<br>(EC 1.6.5.3)                         | FIG00068727 | icw(1);Respiratory_Complex_I<br>icw(1);NADH_ubiquinone_oxidoreduc<br>tase |
| fig 6666666.28482.peg.3590 | Contig_39 | 5564  | 7126  | + | NADH-ubiquinone<br>oxidoreductase chain M<br>(EC 1.6.5.3)                         | FIG00138227 | icw(6);Respiratory_Complex_I<br>icw(6);NADH_ubiquinone_oxidoreduc<br>tase |
| fig 6666666.28482.peg.3591 | Contig_39 | 7123  | 8703  | + | NADH-ubiquinone<br>oxidoreductase chain N<br>(EC 1.6.5.3)                         | FIG00000512 | icw(3);Respiratory_Complex_I<br>icw(3);NADH_ubiquinone_oxidoreduc<br>tase |
| fig 6666666.28482.peg.3592 | Contig_39 | 9162  | 8716  | - | Possible membrane<br>protein                                                      | FIG01315779 | ff                                                                        |
| fig 6666666.28482.peg.3593 | Contig_39 | 10418 | 9159  | - | POSSIBLE CONSERVED<br>SECRETED PROTEIN                                            | FIG00996000 | ff                                                                        |
| fig 6666666.28482.peg.3594 | Contig_39 | 11392 | 10424 | - | Probable methanol<br>dehydrogenase<br>transcriptional regulatory<br>protein MoxR3 | FIG01001992 | ff                                                                        |
| fig 6666666.28482.peg.3595 | Contig_39 | 11871 | 11389 | - | FIG00997183:<br>hypothetical protein                                              | FIG00997177 | ff                                                                        |
| fig 6666666.28482.peg.3596 | Contig_39 | 12794 | 11868 | - | FIG00995849:<br>hypothetical protein                                              | FIG00995847 | ff                                                                        |
| fig 6666666.28482.peg.3597 | Contig_39 | 13160 | 14170 | + | putative YrbE family<br>protein                                                   | FIG01497886 | ff                                                                        |

|                            |           |       |       |   |                                                                                          |             |                                                                         |
|----------------------------|-----------|-------|-------|---|------------------------------------------------------------------------------------------|-------------|-------------------------------------------------------------------------|
| fig 6666666.28482.peg.3598 | Contig_39 | 14180 | 15040 | + | ABC-type transport system involved in resistance to organic solvents, permease component | FIG00450905 | ff                                                                      |
| fig 6666666.28482.peg.3599 | Contig_39 | 15044 | 16096 | + | putative Mce family protein                                                              |             |                                                                         |
| fig 6666666.28482.peg.3600 | Contig_39 | 16093 | 17103 | + | MCE-family protein Mce1B                                                                 |             | icw(1);Mycobacterium_virulence_op<br>eron_MCE_involved_in_cell_invasion |
| fig 6666666.28482.peg.3601 | Contig_39 | 17103 | 18125 | + | putative Mce family protein                                                              |             |                                                                         |
| fig 6666666.28482.peg.3602 | Contig_39 | 18127 | 19284 | + | MCE-family protein Mce1D                                                                 |             | idu(6);Mycobacterium_virulence_ope<br>ron_MCE_involved_in_cell_invasion |
| fig 6666666.28482.peg.3603 | Contig_39 | 19296 | 20354 | + | putative Mce family protein                                                              |             |                                                                         |
| fig 6666666.28482.peg.3604 | Contig_39 | 20351 | 21316 | + | secreted protein                                                                         |             |                                                                         |
| fig 6666666.28482.peg.3605 | Contig_39 | 21333 | 22088 | + | hypothetical protein                                                                     |             |                                                                         |
| fig 6666666.28482.peg.3606 | Contig_39 | 22099 | 22872 | + | hypothetical protein                                                                     |             |                                                                         |
| fig 6666666.28482.peg.3607 | Contig_39 | 23242 | 22877 | - | hypothetical protein                                                                     |             |                                                                         |
| fig 6666666.28482.peg.3608 | Contig_39 | 23344 | 24726 | + | FIG00822613:<br>hypothetical protein                                                     | FIG00822610 | ff                                                                      |
| fig 6666666.28482.peg.3609 | Contig_39 | 24756 | 25361 | + | Methyltransferase type 11                                                                |             |                                                                         |
| fig 6666666.28482.peg.3610 | Contig_39 | 26220 | 25348 | - | 7-alpha-hydroxysteroid dehydrogenase (EC 1.1.1.159)                                      | FIG01308941 | ff                                                                      |
| fig 6666666.28482.peg.3611 | Contig_39 | 26717 | 26217 | - | Transcriptional regulator, TetR family                                                   | FIG00554417 | ff                                                                      |
| fig 6666666.28482.peg.3612 | Contig_39 | 26879 | 28036 | + | Phosphotransferase                                                                       | FIG01421608 | ff                                                                      |

|                            |           |       |       |   |                                                            |             |                                                                                                                                   |
|----------------------------|-----------|-------|-------|---|------------------------------------------------------------|-------------|-----------------------------------------------------------------------------------------------------------------------------------|
| fig 6666666.28482.peg.3613 | Contig_39 | 28036 | 29151 | + | Putative uncharacterized protein BCG_3193                  | FIG01325639 | ff                                                                                                                                |
| fig 6666666.28482.peg.3614 | Contig_39 | 30143 | 29148 | - | PROBABLE<br>OXIDOREDUCTASE                                 | FIG01416034 | ff                                                                                                                                |
| fig 6666666.28482.peg.3615 | Contig_39 | 30225 | 31571 | + | Amine oxidase [flavin-containing] A (EC 1.4.3.4)           | FIG01366019 | ff                                                                                                                                |
| fig 6666666.28482.peg.3616 | Contig_39 | 32516 | 31566 | - | Non-heme<br>haloperoxidase Hpx                             | FIG01312018 | ff                                                                                                                                |
| fig 6666666.28482.peg.3617 | Contig_39 | 32645 | 34000 | + | Monoamine oxidase                                          | FIG00827338 | ff                                                                                                                                |
| fig 6666666.28482.peg.3618 | Contig_39 | 34453 | 34007 | - | hypothetical protein                                       | FIG00638284 | ff                                                                                                                                |
| fig 6666666.28482.peg.3619 | Contig_39 | 35562 | 34492 | - | transcriptional regulator, AraC family                     | FIG00628273 | ff                                                                                                                                |
| fig 6666666.28482.peg.3620 | Contig_39 | 36716 | 35559 | - | Glycosyl transferase, group 1                              | FIG01560076 | ff                                                                                                                                |
| fig 6666666.28482.peg.3621 | Contig_39 | 36879 | 37100 | + | protein-glutamate<br>methylesterase CheB( EC:3.1.1.61 )    |             |                                                                                                                                   |
| fig 6666666.28482.peg.3622 | Contig_39 | 37145 | 37735 | + | CheB methylesterase( EC:3.1.1.61 )                         | FIG00908064 | ff                                                                                                                                |
| fig 6666666.28482.peg.3623 | Contig_39 | 39596 | 37749 | - | Chemotaxis protein<br>methyltransferase CheR (EC 2.1.1.80) | FIG00000452 | isu;Bacterial_Chemotaxis                                                                                                          |
| fig 6666666.28482.peg.3624 | Contig_39 | 40407 | 39649 | - | FIG00824935:<br>hypothetical protein                       | FIG00824933 | ff                                                                                                                                |
| fig 6666666.28482.peg.3625 | Contig_39 | 41419 | 40400 | - | Protein-glutamate<br>methylesterase                        | FIG01745458 | ff                                                                                                                                |
| fig 6666666.28482.peg.3626 | Contig_39 | 41517 | 43646 | + | Catalase (EC 1.11.1.6)                                     | FIG00000313 | idu(3);Oxidative_stress<br>idu(3);Photorespiration_(oxidative_C<br>2_cycle)<br>idu(3);Protection_from_Reactive_Ox<br>ygen_Species |

|                            |           |       |       |   |                                                                                                                       |             |                                                     |
|----------------------------|-----------|-------|-------|---|-----------------------------------------------------------------------------------------------------------------------|-------------|-----------------------------------------------------|
| fig 6666666.28482.peg.3627 | Contig_39 | 43666 | 43923 | + | FIG00823837:<br>hypothetical protein                                                                                  | FIG00823834 | ff                                                  |
| fig 6666666.28482.peg.3628 | Contig_39 | 44642 | 44058 | - | FIG00826083:<br>hypothetical protein                                                                                  | FIG00826080 | ff                                                  |
| fig 6666666.28482.peg.3629 | Contig_39 | 44810 | 45754 | + | Acyl-CoA<br>dehydrogenase/oxidase<br>domain protein                                                                   | FIG00841842 | ff                                                  |
| fig 6666666.28482.peg.3630 | Contig_39 | 45751 | 46524 | + | LmbE-like protein                                                                                                     | FIG00998828 | ff                                                  |
| fig 6666666.28482.peg.3631 | Contig_39 | 46521 | 47078 | + | probable<br>methyltransferase                                                                                         |             |                                                     |
| fig 6666666.28482.peg.3632 | Contig_39 | 47092 | 47874 | + | endonuclease/exonuclea<br>se/phosphatase                                                                              | FIG01502470 | ff                                                  |
| fig 6666666.28482.peg.3633 | Contig_39 | 48154 | 47879 | - | hypothetical protein                                                                                                  |             |                                                     |
| fig 6666666.28482.peg.3634 | Contig_39 | 48503 | 48267 | - | FIG00824078:<br>hypothetical protein                                                                                  | FIG01339979 | ff                                                  |
| fig 6666666.28482.peg.3635 | Contig_39 | 48673 | 49515 | + | hypothetical protein                                                                                                  |             |                                                     |
| fig 6666666.28482.peg.3636 | Contig_39 | 49786 | 50184 | + | FIG00820286:<br>hypothetical protein                                                                                  | FIG00820285 | ff                                                  |
| fig 6666666.28482.peg.3637 | Contig_39 | 50296 | 51351 | + | Hypothetical protein<br>PA2244 (similar to DNA<br>topoisomerase IB, but<br>possibly involved in<br>glycosyl-transfer) | FIG00002100 | isu;DNA_topoisomerases,_Type_I,_A<br>TP-independent |
| fig 6666666.28482.peg.3638 | Contig_4  | 75    | 539   | + | FIG00823304:<br>hypothetical protein                                                                                  | FIG00823303 | ff                                                  |
| fig 6666666.28482.peg.3639 | Contig_4  | 651   | 1700  | + | Serine protease PepA                                                                                                  | FIG01322276 | ff                                                  |
| fig 6666666.28482.peg.3640 | Contig_4  | 1812  | 3593  | + | Trehalose synthase (EC<br>5.4.99.16)                                                                                  | FIG00005112 | isu;Trehalose_Biosynthesis                          |
| fig 6666666.28482.peg.3641 | Contig_4  | 3590  | 4933  | + | uncharacterized protein<br>probably involved in<br>trehalose biosynthesis                                             | FIG01418635 | ff                                                  |

|                            |          |       |       |   |                                                                                                    |             |                                                                                                                                                                                                                            |
|----------------------------|----------|-------|-------|---|----------------------------------------------------------------------------------------------------|-------------|----------------------------------------------------------------------------------------------------------------------------------------------------------------------------------------------------------------------------|
| fig 6666666.28482.peg.3642 | Contig_4 | 4998  | 5711  | + | Possible membrane protein                                                                          | FIG01121868 | ff                                                                                                                                                                                                                         |
| fig 6666666.28482.peg.3643 | Contig_4 | 6787  | 5747  | - | Antigen 85-C precursor (85C) (Antigen 85 complex C) (Ag85C) (Mycolyl transferase 85C) (EC 2.3.1.-) | FIG00027986 | ff                                                                                                                                                                                                                         |
| fig 6666666.28482.peg.3644 | Contig_4 | 7825  | 6998  | - | ABC-type drug export system, membrane protein                                                      | FIG00822310 | ff                                                                                                                                                                                                                         |
| fig 6666666.28482.peg.3645 | Contig_4 | 8636  | 7815  | - | ABC transporter, ATP-binding component( EC:3.6.3.- )                                               | FIG00826428 | ff                                                                                                                                                                                                                         |
| fig 6666666.28482.peg.3646 | Contig_4 | 9079  | 8633  | - | Transcriptional regulator, MarR family                                                             | FIG00554610 | ff                                                                                                                                                                                                                         |
| fig 6666666.28482.peg.3647 | Contig_4 | 9642  | 9145  | - | Phosphoesterase                                                                                    | FIG01238380 | ff                                                                                                                                                                                                                         |
| fig 6666666.28482.peg.3648 | Contig_4 | 9833  | 9657  | - | FIG00827455: hypothetical protein                                                                  | FIG00827452 | ff                                                                                                                                                                                                                         |
| fig 6666666.28482.peg.3649 | Contig_4 | 9928  | 10383 | + | Probable enoyl-CoA hydratase 1 (EC 4.2.1.17)                                                       | FIG00825052 | ff                                                                                                                                                                                                                         |
| fig 6666666.28482.peg.3650 | Contig_4 | 11746 | 10451 | - | Butyryl-CoA dehydrogenase (EC 1.3.99.2)                                                            | FIG00009149 | idu(39);Isoleucine_degradation<br>idu(39);Lysine_fermentation<br>idu(39);Butanol_Biosynthesis<br>idu(39);Acetyl-CoA_fermentation_to_Butyrate<br>idu(39);Valine_degradation<br>idu(39);Anaerobic_respiratory_reduc<br>tases |
| fig 6666666.28482.peg.3651 | Contig_4 | 12526 | 11828 | - | FIG00821964: hypothetical protein                                                                  | FIG00821963 | ff                                                                                                                                                                                                                         |

|                            |          |       |       |   |                                                                   |             |                                         |
|----------------------------|----------|-------|-------|---|-------------------------------------------------------------------|-------------|-----------------------------------------|
| fig 6666666.28482.peg.3652 | Contig_4 | 12660 | 13556 | + | Mn-containing catalase                                            | FIG00459436 | ff                                      |
| fig 6666666.28482.peg.3653 | Contig_4 | 14194 | 13616 | - | hemerythrin HHE cation binding domain subfamily protein, putative | FIG01926271 | ff                                      |
| fig 6666666.28482.peg.3654 | Contig_4 | 15339 | 14242 | - | F420-dependent glucose-6-phosphate dehydrogenase Fgd3             | FIG01311596 | ff                                      |
| fig 6666666.28482.peg.3655 | Contig_4 | 15391 | 15996 | + | puromycin N-acetyltransferase, putative                           | FIG00827377 | ff                                      |
| fig 6666666.28482.peg.3656 | Contig_4 | 16328 | 16017 | - | FIG00826668: hypothetical protein                                 |             |                                         |
| fig 6666666.28482.peg.3657 | Contig_4 | 16500 | 16856 | + | FIG00825777: hypothetical protein                                 | FIG00825775 | ff                                      |
| fig 6666666.28482.peg.3658 | Contig_4 | 17568 | 16894 | - | Transcriptional regulator, TetR family                            | FIG00554417 | ff                                      |
| fig 6666666.28482.peg.3659 | Contig_4 | 17639 | 18733 | + | Flavodoxin reductases (ferredoxin-NADPH reductases) family 1      | FIG01954108 | idu(3);Anaerobic_respiratory_reductases |
| fig 6666666.28482.peg.3660 | Contig_4 | 18759 | 19865 | + | POSSIBLE LINOLEOYL-CoA DESATURASE (DELTA(6)-DESATURASE)           | FIG00539310 | ff                                      |
| fig 6666666.28482.peg.3661 | Contig_4 | 19968 | 20444 | + | FIG00822225: hypothetical protein                                 | FIG00822224 | ff                                      |
| fig 6666666.28482.peg.3662 | Contig_4 | 20444 | 21487 | + | FIG00823171: hypothetical protein                                 | FIG00823170 | ff                                      |
| fig 6666666.28482.peg.3663 | Contig_4 | 22666 | 21563 | - | FIG00821861: hypothetical protein                                 | FIG00821860 | ff                                      |
| fig 6666666.28482.peg.3664 | Contig_4 | 23238 | 22663 | - | Transcriptional regulator, TetR family                            | FIG00554417 | ff                                      |

|                            |          |       |       |   |                                                                                                                   |             |                                                                                                |
|----------------------------|----------|-------|-------|---|-------------------------------------------------------------------------------------------------------------------|-------------|------------------------------------------------------------------------------------------------|
| fig 6666666.28482.peg.3665 | Contig_4 | 23267 | 24511 | + | FIG00831221:<br>hypothetical protein                                                                              | FIG00831214 | ff                                                                                             |
| fig 6666666.28482.peg.3666 | Contig_4 | 24538 | 25428 | + | Epoxide hydrolase (EC 3.3.2.9)                                                                                    | FIG00009455 | idu(3);CBSS-410289.13.peg.3174                                                                 |
| fig 6666666.28482.peg.3667 | Contig_4 | 25653 | 25441 | - | Molybdate-binding domain of ModE                                                                                  | FIG01304698 | isu;Molybdenum_cofactor_biosynthesis                                                           |
| fig 6666666.28482.peg.3668 | Contig_4 | 26328 | 25744 | - | Transcriptional regulator, TetR family                                                                            | FIG00554417 | ff                                                                                             |
| fig 6666666.28482.peg.3669 | Contig_4 | 26483 | 27823 | + | Cytochrome P450 138                                                                                               | FIG01333220 | ff                                                                                             |
| fig 6666666.28482.peg.3670 | Contig_4 | 28340 | 27825 | - | Peptide methionine sulfoxide reductase MsrA (EC 1.8.4.11)                                                         | FIG00002199 | isu;Peptide_methionine_sulfoxide_reductase<br>isu;Putative_sugar_ABC_transporter_(ytf_cluster) |
| fig 6666666.28482.peg.3671 | Contig_4 | 28480 | 28986 | + | FIG00821695:<br>hypothetical protein                                                                              | FIG00821694 | ff                                                                                             |
| fig 6666666.28482.peg.3672 | Contig_4 | 28983 | 30026 | + | Dihydroflavonol-4-reductase (EC 1.1.1.219)                                                                        | FIG00042188 | idu(2);Biflavanoid_biosynthesis<br>idu(2);Tannin_biosynthesis                                  |
| fig 6666666.28482.peg.3673 | Contig_4 | 31070 | 30045 | - | Exopolyphosphatase (EC 3.6.1.11)                                                                                  | FIG00066575 | idu(2);Polyphosphate<br>idu(2);Phosphate_metabolism                                            |
| fig 6666666.28482.peg.3674 | Contig_4 | 31172 | 31555 | + | FIG00822464:<br>hypothetical protein                                                                              | FIG00822461 | ff                                                                                             |
| fig 6666666.28482.peg.3675 | Contig_4 | 31900 | 31535 | - | FIG00820093:<br>hypothetical protein                                                                              | FIG00820092 | ff                                                                                             |
| fig 6666666.28482.peg.3676 | Contig_4 | 31930 | 32940 | + | FIG00822261:<br>hypothetical protein                                                                              | FIG00822260 | ff                                                                                             |
| fig 6666666.28482.peg.3677 | Contig_4 | 33028 | 33576 | + | Non-specific DNA-binding protein Dps / Iron-binding ferritin-like antioxidant protein / Ferroxidase (EC 1.16.3.1) | FIG00109595 | isu;Oxidative_stress<br>isu;Oxidative_stress<br>isu;Oxidative_stress                           |

|                            |          |       |       |   |                                            |             |                                                                                                                                                                             |
|----------------------------|----------|-------|-------|---|--------------------------------------------|-------------|-----------------------------------------------------------------------------------------------------------------------------------------------------------------------------|
| fig 6666666.28482.peg.3678 | Contig_4 | 35003 | 33573 | - | Chloride channel protein                   | FIG00731882 | ff                                                                                                                                                                          |
| fig 6666666.28482.peg.3679 | Contig_4 | 35130 | 36092 | + | Pirin                                      | FIG01319925 | ff                                                                                                                                                                          |
| fig 6666666.28482.peg.3680 | Contig_4 | 36167 | 36730 | + | Transcriptional regulator, TetR family     | FIG00554417 | ff                                                                                                                                                                          |
| fig 6666666.28482.peg.3681 | Contig_4 | 36803 | 37744 | + | FIG00823034: hypothetical protein          | FIG00823032 | ff                                                                                                                                                                          |
| fig 6666666.28482.peg.3682 | Contig_4 | 37764 | 38705 | + | FIG00823034: hypothetical protein          | FIG00823032 | ff                                                                                                                                                                          |
| fig 6666666.28482.peg.3683 | Contig_4 | 38706 | 39632 | + | FIG00829840: hypothetical protein          | FIG00829836 | ff                                                                                                                                                                          |
| fig 6666666.28482.peg.3684 | Contig_4 | 39746 | 41182 | + | Aldehyde dehydrogenase (EC 1.2.1.3)        | FIG01292786 | idu(16);Pyruvate_metabolism_II:_acetyl-CoA,_acetogenesis_from_pyruvate idu(16);Glycerolipid_and_Glycerophospholipid_Metabolism_in_Bacteria idu(16);Methylglyoxal_Metabolism |
| fig 6666666.28482.peg.3685 | Contig_4 | 41250 | 42101 | + | Short-chain dehydrogenase/reductase SDR    | FIG00546160 | idu(13);CBSS-164757.7.peg.5020 idu(13);Transcription_repair_cluster                                                                                                         |
| fig 6666666.28482.peg.3686 | Contig_4 | 42118 | 43074 | + | Quinone oxidoreductase (EC 1.6.5.5)        | FIG00002982 | idu(7);Quinone_oxidoreductase_family                                                                                                                                        |
| fig 6666666.28482.peg.3687 | Contig_4 | 44818 | 43097 | - | PPE family protein                         | FIG00013075 | icw(2);CBSS-164757.7.peg.5020                                                                                                                                               |
| fig 6666666.28482.peg.3688 | Contig_4 | 46658 | 45000 | - | PPE family protein                         | FIG00013075 | icw(2);CBSS-164757.7.peg.5020                                                                                                                                               |
| fig 6666666.28482.peg.3689 | Contig_4 | 47590 | 46769 | - | Protein tyrosine phosphatase (EC 3.1.3.48) | FIG00819984 | ff                                                                                                                                                                          |

|                            |          |       |       |   |                                                    |             |                                                                                                                                                                                                                        |
|----------------------------|----------|-------|-------|---|----------------------------------------------------|-------------|------------------------------------------------------------------------------------------------------------------------------------------------------------------------------------------------------------------------|
| fig 6666666.28482.peg.3690 | Contig_4 | 48824 | 47583 | - | Butyryl-CoA dehydrogenase (EC 1.3.99.2)            | FIG00009149 | idu(39);Isoleucine_degradation<br>idu(39);Lysine_fermentation<br>idu(39);Butanol_Biosynthesis<br>idu(39);Acetyl-CoA_fermentation_to_Butyrate<br>idu(39);Valine_degradation<br>idu(39);Anaerobic_respiratory_reductions |
| fig 6666666.28482.peg.3691 | Contig_4 | 48777 | 48899 | + | hypothetical protein                               |             |                                                                                                                                                                                                                        |
| fig 6666666.28482.peg.3692 | Contig_4 | 48934 | 49404 | + | FIG00823327:<br>hypothetical protein               | FIG00823326 | ff                                                                                                                                                                                                                     |
| fig 6666666.28482.peg.3693 | Contig_4 | 49418 | 50560 | + | NAD(P) transhydrogenase alpha subunit (EC 1.6.1.2) | FIG00001143 | icw(2);Phosphate_metabolism                                                                                                                                                                                            |
| fig 6666666.28482.peg.3694 | Contig_4 | 50561 | 50896 | + | NAD(P) transhydrogenase alpha subunit (EC 1.6.1.2) | FIG00001143 | icw(2);Phosphate_metabolism                                                                                                                                                                                            |
| fig 6666666.28482.peg.3695 | Contig_4 | 50893 | 52317 | + | NAD(P) transhydrogenase subunit beta (EC 1.6.1.2)  | FIG00000629 | isu;Phosphate_metabolism                                                                                                                                                                                               |
| fig 6666666.28482.peg.3696 | Contig_4 | 52439 | 52314 | - | FIG00821071:<br>hypothetical protein               | FIG00821070 | ff                                                                                                                                                                                                                     |
| fig 6666666.28482.peg.3697 | Contig_4 | 52531 | 52412 | - | hypothetical protein                               |             |                                                                                                                                                                                                                        |
| fig 6666666.28482.peg.3698 | Contig_4 | 52577 | 53200 | + | Transcriptional regulator, TetR family             | FIG00554417 | ff                                                                                                                                                                                                                     |
| fig 6666666.28482.peg.3699 | Contig_4 | 54663 | 53209 | - | PE family protein                                  | FIG01311212 | ff                                                                                                                                                                                                                     |
| fig 6666666.28482.peg.3700 | Contig_4 | 55682 | 54786 | - | FIG00826838:<br>hypothetical protein               | FIG00826837 | ff                                                                                                                                                                                                                     |
| fig 6666666.28482.peg.3701 | Contig_4 | 55777 | 56877 | + | FIG00827540:<br>hypothetical protein               | FIG00827537 | ff                                                                                                                                                                                                                     |

|                            |          |       |       |   |                                                                   |             |                                                                                                              |
|----------------------------|----------|-------|-------|---|-------------------------------------------------------------------|-------------|--------------------------------------------------------------------------------------------------------------|
| fig 6666666.28482.peg.3702 | Contig_4 | 56896 | 57636 | + | 3-oxoacyl-[acyl-carrier protein] reductase (EC 1.1.1.100)         | FIG00621114 | idu(38);CBSS-246196.1.peg.364<br>idu(38);CBSS-164757.7.peg.5020<br>idu(38);Fatty_Acid_Biosynthesis_FASI<br>I |
| fig 6666666.28482.peg.3703 | Contig_4 | 58246 | 58410 | + | hypothetical protein                                              |             |                                                                                                              |
| fig 6666666.28482.peg.3704 | Contig_4 | 59043 | 58459 | - | hypothetical protein                                              | FIG00638284 | ff                                                                                                           |
| fig 6666666.28482.peg.3705 | Contig_4 | 59069 | 59248 | + | hypothetical protein                                              |             |                                                                                                              |
| fig 6666666.28482.peg.3706 | Contig_4 | 59399 | 60916 | + | TldD family protein, Actinobacterial subgroup                     | FIG00018909 | idu(1);CBSS-316273.3.peg.448<br>idu(1);Putative_TldE-TldD_proteolytic_complex                                |
| fig 6666666.28482.peg.3707 | Contig_4 | 60913 | 62286 | + | TldE/PmbA family protein, Actinobacterial subgroup                | FIG00020189 | icw(1);CBSS-316273.3.peg.448<br>icw(1);Putative_TldE-TldD_proteolytic_complex                                |
| fig 6666666.28482.peg.3708 | Contig_4 | 62441 | 64120 | + | Lipid A export ATP-binding/permease protein MsbA                  | FIG00017059 | ff                                                                                                           |
| fig 6666666.28482.peg.3709 | Contig_4 | 64207 | 66039 | + | Lipid A export ATP-binding/permease protein MsbA                  | FIG00017059 | ff                                                                                                           |
| fig 6666666.28482.peg.3710 | Contig_4 | 67108 | 66068 | - | hypothetical protein                                              |             |                                                                                                              |
| fig 6666666.28482.peg.3711 | Contig_4 | 67597 | 67166 | - | hypothetical protein                                              |             |                                                                                                              |
| fig 6666666.28482.peg.3712 | Contig_4 | 68551 | 69480 | + | Alpha-ketoglutarate-dependent taurine dioxygenase (EC 1.14.11.17) | FIG00001391 | idu(1);Alkanesulfonate_assimilation                                                                          |
| fig 6666666.28482.peg.3713 | Contig_4 | 69573 | 70922 | + | (S)-2-hydroxy-acid oxidase chain D (EC 1.1.3.15)                  | FIG00827136 | ff                                                                                                           |
| fig 6666666.28482.peg.3714 | Contig_4 | 70957 | 71307 | + | hypothetical protein                                              |             |                                                                                                              |
| fig 6666666.28482.peg.3715 | Contig_4 | 71929 | 71390 | - | Transcriptional regulator, TetR family                            | FIG00554417 | ff                                                                                                           |

|                            |          |       |       |   |                                                              |             |                                                                                            |
|----------------------------|----------|-------|-------|---|--------------------------------------------------------------|-------------|--------------------------------------------------------------------------------------------|
| fig 6666666.28482.peg.3716 | Contig_4 | 72794 | 71961 | - | TesB-like acyl-CoA thioesterase 5                            | FIG00057597 | isu;Acyl-CoA_thioesterase_II                                                               |
| fig 6666666.28482.peg.3717 | Contig_4 | 73615 | 72812 | - | FIG00822547: hypothetical protein                            | FIG00822546 | ff                                                                                         |
| fig 6666666.28482.peg.3718 | Contig_4 | 74155 | 73664 | - | FIG00822620: hypothetical protein                            | FIG00822615 | ff                                                                                         |
| fig 6666666.28482.peg.3719 | Contig_4 | 74251 | 75141 | + | Acyl-CoA thioesterase II (EC 3.1.2.-)                        | FIG00002217 | icw(1);Acyl-CoA_thioesterase_II                                                            |
| fig 6666666.28482.peg.3720 | Contig_4 | 75147 | 76061 | + | FIG00827292: hypothetical protein                            | FIG00827279 | ff                                                                                         |
| fig 6666666.28482.peg.3721 | Contig_4 | 76062 | 77216 | + | FIG00824968: hypothetical protein                            | FIG00824966 | ff                                                                                         |
| fig 6666666.28482.peg.3722 | Contig_4 | 77874 | 77197 | - | FIG00821430: hypothetical protein                            | FIG00821427 | ff                                                                                         |
| fig 6666666.28482.peg.3723 | Contig_4 | 78365 | 77871 | - | transcriptional regulatory protein                           |             |                                                                                            |
| fig 6666666.28482.peg.3724 | Contig_4 | 78454 | 79374 | + | NmrA-like                                                    |             |                                                                                            |
| fig 6666666.28482.peg.3725 | Contig_4 | 79482 | 80669 | + | acyl-CoA transferase                                         | FIG01333498 | ff                                                                                         |
| fig 6666666.28482.peg.3726 | Contig_4 | 80760 | 81317 | + | FIG00824032: hypothetical protein                            | FIG00824027 | ff                                                                                         |
| fig 6666666.28482.peg.3727 | Contig_4 | 81321 | 82025 | + | FIG00822996: hypothetical protein                            | FIG00822995 | ff                                                                                         |
| fig 6666666.28482.peg.3728 | Contig_4 | 82022 | 83233 | + | Nikkomycin biosynthesis protein SanQ                         | FIG01396881 | ff                                                                                         |
| fig 6666666.28482.peg.3729 | Contig_4 | 83235 | 84212 | + | alcohol dehydrogenase                                        | FIG00945718 | ff                                                                                         |
| fig 6666666.28482.peg.3730 | Contig_4 | 84209 | 84946 | + | 2,4-dihydroxyhept-2-ene-1,7-dioic acid aldolase (EC 4.1.2.-) | FIG00110223 | idu(1);Aromatic_amino_acid_degradation idu(1);4-Hydroxyphenylacetic_acid_catabolic_pathway |
| fig 6666666.28482.peg.3731 | Contig_4 | 84943 | 85335 | + | conserved hypothetical protein                               |             |                                                                                            |

|                            |          |       |       |   |                                                               |             |                                                                                                                                                       |
|----------------------------|----------|-------|-------|---|---------------------------------------------------------------|-------------|-------------------------------------------------------------------------------------------------------------------------------------------------------|
| fig 6666666.28482.peg.3732 | Contig_4 | 85332 | 86060 | + | 3-oxoacyl-[acyl-carrier protein] reductase (EC 1.1.1.100)     | FIG00621114 | idu(38);CBSS-246196.1.peg.364<br>idu(38);CBSS-164757.7.peg.5020<br>idu(38);Fatty_Acid_Biosynthesis_FASI<br>I                                          |
| fig 6666666.28482.peg.3733 | Contig_4 | 86057 | 87523 | + | Cyclohexanone monooxygenase (EC 1.14.13.22)                   | FIG00975774 | ff                                                                                                                                                    |
| fig 6666666.28482.peg.3734 | Contig_4 | 87520 | 88470 | + | Probable lipase/esterase                                      | FIG01377204 | ff                                                                                                                                                    |
| fig 6666666.28482.peg.3735 | Contig_4 | 88490 | 89797 | + | Alcohol dehydrogenase (EC 1.1.1.1)                            | FIG01007502 | idu(17);Glycerolipid_and_Glycerophospholipid_Metabolism_in_Bacteria<br>idu(17);Fermentations:_Mixed_acid<br>idu(17);Butanol_Biosynthesis              |
| fig 6666666.28482.peg.3736 | Contig_4 | 89801 | 90256 | + | putative 4-hydroxybenzoyl-CoA thioesterase                    | FIG00138976 | isu;Gentisare_degradation                                                                                                                             |
| fig 6666666.28482.peg.3737 | Contig_4 | 90286 | 90720 | + | FIG00820956: hypothetical protein                             | FIG00820954 | ff                                                                                                                                                    |
| fig 6666666.28482.peg.3738 | Contig_4 | 91415 | 90723 | - | Predicted regulator PutR for proline utilization, GntR family | FIG00004161 | idu(2);Proline,_4-hydroxyproline_uptake_and_utilization                                                                                               |
| fig 6666666.28482.peg.3739 | Contig_4 | 91575 | 93212 | + | Long-chain-fatty-acid--CoA ligase (EC 6.2.1.3)                | FIG00018699 | idu(72);n-Phenylalkanoic_acid_degradation<br>idu(72);Fatty_acid_metabolism_cluster<br>idu(72);Biotin_synthesis_cluster<br>idu(72);Biotin_biosynthesis |

|                            |           |       |       |   |                                                                 |             |                                                                                                              |
|----------------------------|-----------|-------|-------|---|-----------------------------------------------------------------|-------------|--------------------------------------------------------------------------------------------------------------|
| fig 6666666.28482.peg.3740 | Contig_4  | 93461 | 94267 | + | Conserved hypothetical<br>integral membrane<br>protein YrbE1A   | FIG00690583 | idu(7);Mycobacterium_virulence_ope<br>ron_MCE_involved_in_cell_invasion                                      |
| fig 6666666.28482.peg.3741 | Contig_4  | 94269 | 95138 | + | Conserved hypothetical<br>integral membrane<br>protein YrbE1B   | FIG00691621 | icw(2);Mycobacterium_virulence_op<br>eron_MCE_involved_in_cell_invasion                                      |
| fig 6666666.28482.peg.3742 | Contig_4  | 95141 | 96487 | + | MCE-family protein<br>Mce1A                                     | FIG00820494 | icw(1);Mycobacterium_virulence_op<br>eron_MCE_involved_in_cell_invasion                                      |
| fig 6666666.28482.peg.3743 | Contig_4  | 96484 | 97524 | + | MCE-family protein<br>Mce1B                                     | FIG00763551 | icw(3);Mycobacterium_virulence_op<br>eron_MCE_involved_in_cell_invasion                                      |
| fig 6666666.28482.peg.3744 | Contig_4  | 97548 | 99110 | + | MCE-family protein<br>Mce1C                                     | FIG00821293 | icw(4);Mycobacterium_virulence_op<br>eron_MCE_involved_in_cell_invasion                                      |
| fig 6666666.28482.peg.3745 | Contig_40 | 1996  | 770   | - | Manganese transport<br>protein MntH                             | FIG00554286 | ff                                                                                                           |
| fig 6666666.28482.peg.3746 | Contig_40 | 2779  | 2087  | - | 3-oxoacyl-[acyl-carrier<br>protein] reductase (EC<br>1.1.1.100) | FIG00621114 | idu(38);CBSS-246196.1.peg.364<br>idu(38);CBSS-164757.7.peg.5020<br>idu(38);Fatty_Acid_Biosynthesis_FASI<br>I |
| fig 6666666.28482.peg.3747 | Contig_40 | 3954  | 2878  | - | FIG00820002:<br>hypothetical protein                            | FIG00820001 | ff                                                                                                           |
| fig 6666666.28482.peg.3748 | Contig_40 | 4903  | 4079  | - | 7-alpha-hydroxysteroid<br>dehydrogenase (EC<br>1.1.1.159)       | FIG01308941 | ff                                                                                                           |

|                            |           |       |       |   |                                                                                      |             |                                                                                                                                                          |
|----------------------------|-----------|-------|-------|---|--------------------------------------------------------------------------------------|-------------|----------------------------------------------------------------------------------------------------------------------------------------------------------|
| fig 6666666.28482.peg.3749 | Contig_40 | 5289  | 6275  | + | Phosphate ABC transporter, periplasmic phosphate-binding protein PstS (TC 3.A.1.7.1) | FIG00010508 | icw(2);High_affinity_phosphate_transporter_and_control_of_PHO_regulon<br>icw(2);Phosphate_metabolism<br>idu(4);PhoR-PhoB_two-component_regulatory_system |
| fig 6666666.28482.peg.3750 | Contig_40 | 6302  | 7279  | + | Phosphate transport system permease protein PstC (TC 3.A.1.7.1)                      | FIG00018561 | idu(1);High_affinity_phosphate_transporter_and_control_of_PHO_regulon<br>idu(1);Phosphate_metabolism                                                     |
| fig 6666666.28482.peg.3751 | Contig_40 | 7353  | 8255  | + | Phosphate transport system permease protein PstA (TC 3.A.1.7.1)                      | FIG00083946 | icw(1);High_affinity_phosphate_transporter_and_control_of_PHO_regulon<br>icw(1);Phosphate_metabolism                                                     |
| fig 6666666.28482.peg.3752 | Contig_40 | 9177  | 8269  | - | Ku domain protein                                                                    | FIG00001754 | isu;DNA_Repair_Base_Excision<br>isu;DNA_ligases<br>isu;Nonhomologous_End-Joining_in_Bacteria<br>isu;Bacillus_subtilis_scratch_-_gjo                      |
| fig 6666666.28482.peg.3753 | Contig_40 | 10158 | 9250  | - | Fructokinase (EC 2.7.1.4)                                                            | FIG00001653 | isu;Fructose_utilization<br>isu;Sucrose_utilization<br>icw(1);Mannitol_Utilization                                                                       |
| fig 6666666.28482.peg.3754 | Contig_40 | 11567 | 10155 | - | Multiple polyol-specific dehydrogenase (EC 1.1.1.-)                                  | FIG00005739 | isu;Mannitol_Utilization                                                                                                                                 |
| fig 6666666.28482.peg.3755 | Contig_40 | 12544 | 11687 | - | FIG00829040:<br>hypothetical protein                                                 | FIG00829038 | ff                                                                                                                                                       |
| fig 6666666.28482.peg.3756 | Contig_40 | 14076 | 12541 | - | FIG00821215:<br>hypothetical protein                                                 | FIG00821214 | ff                                                                                                                                                       |

|                            |           |       |       |   |                                                                       |             |                                                                                                                                                                                                                                                                                                                                                   |
|----------------------------|-----------|-------|-------|---|-----------------------------------------------------------------------|-------------|---------------------------------------------------------------------------------------------------------------------------------------------------------------------------------------------------------------------------------------------------------------------------------------------------------------------------------------------------|
| fig 6666666.28482.peg.3757 | Contig_40 | 14211 | 16469 | + | ATP-dependent DNA ligase (EC 6.5.1.1) clustered with Ku protein, LigD | FIG00002268 | idu(2);DNA_Repair_Base_Excision<br>idu(2);DNA_ligases<br>idu(2);Nonhomologous_End-Joining_in_Bacteria<br>idu(2);Bacillus_subtilis_scratch_-_gjo                                                                                                                                                                                                   |
| fig 6666666.28482.peg.3758 | Contig_40 | 16466 | 18406 | + | Fumarylacetoacetase (EC 3.7.1.2)                                      | FIG00001596 | idu(1);Homogentisate_pathway_of_aromatic_compound_degradation<br>idu(1);Pterin_carbinolamine_dehydratase<br>idu(1);Salicylate_and_gentisate_catabolism                                                                                                                                                                                            |
| fig 6666666.28482.peg.3759 | Contig_40 | 19387 | 18473 | - | O-Methyltransferase involved in polyketide biosynthesis               | FIG01313020 | ff                                                                                                                                                                                                                                                                                                                                                |
| fig 6666666.28482.peg.3760 | Contig_40 | 19471 | 20268 | + | Enoyl-CoA hydratase (EC 4.2.1.17)                                     | FIG00033206 | idu(51);n-Phenylalkanoic_acid_degradation<br>idu(51);Polyhydroxybutyrate_metabolism<br>idu(51);Isoleucine_degradation<br>idu(51);Fatty_acid_metabolism_cluster<br>idu(51);Lysine_fermentation<br>idu(51);Butanol_Biosynthesis<br>idu(51);Acetyl-CoA_fermentation_to_Butyrate<br>idu(51);Valine_degradation<br>idu(51);Butyrate_metabolism_cluster |
| fig 6666666.28482.peg.3761 | Contig_40 | 21138 | 20272 | - | Hydride transferase 1 (Fragment)                                      | FIG01353725 | ff                                                                                                                                                                                                                                                                                                                                                |

|                            |           |       |       |   |                                                                                    |             |                                                                                                |
|----------------------------|-----------|-------|-------|---|------------------------------------------------------------------------------------|-------------|------------------------------------------------------------------------------------------------|
| fig 6666666.28482.peg.3762 | Contig_40 | 21994 | 21230 | - | FIG00823384:<br>hypothetical protein                                               | FIG00823383 | ff                                                                                             |
| fig 6666666.28482.peg.3763 | Contig_40 | 23452 | 22310 | - | Cyclohexanone<br>monooxygenase (EC<br>1.14.13.22)                                  | FIG00975774 | ff                                                                                             |
| fig 6666666.28482.peg.3764 | Contig_40 | 24384 | 23479 | - | FIG00822913:<br>hypothetical protein                                               | FIG00822912 | ff                                                                                             |
| fig 6666666.28482.peg.3765 | Contig_40 | 24484 | 25239 | + | Precorrin-6A synthase<br>(EC 2.1.1.152)                                            | FIG00003681 | isu;Coenzyme_B12_biosynthesis                                                                  |
| fig 6666666.28482.peg.3766 | Contig_40 | 25245 | 26108 | + | Formamidopyrimidine-<br>DNA glycosylase (EC<br>3.2.2.23)                           | FIG00035634 | idu(3);DNA_Repair_Base_Excision                                                                |
| fig 6666666.28482.peg.3767 | Contig_40 | 26138 | 26887 | + | Oxidoreductase, short-<br>chain<br>dehydrogenase/reductas<br>e family (EC 1.1.1.-) | FIG01955289 | idu(2);CBSS-291331.3.peg.3674<br>idu(2);Capsular_Polysaccharides_Bios<br>ynthesis_and_Assembly |
| fig 6666666.28482.peg.3768 | Contig_40 | 28555 | 26891 | - | Glucose-6-phosphate<br>isomerase (EC 5.3.1.9)                                      | FIG00000245 | ff                                                                                             |
| fig 6666666.28482.peg.3769 | Contig_40 | 28880 | 28608 | - | Chorismate mutase I (EC<br>5.4.99.5)                                               | FIG00001498 | isu;Chorismate_Synthesis<br>isu;Phenylalanine_and_Tyrosine_Bra<br>nches_from_Chorismate        |
| fig 6666666.28482.peg.3770 | Contig_40 | 29269 | 32664 | + | Pyruvate carboxyl<br>transferase (EC 6.4.1.1)                                      | FIG00001308 | isu;Pyruvate_metabolism_I:_anapler<br>otic_reactions,_PEP                                      |
| fig 6666666.28482.peg.3771 | Contig_40 | 32908 | 32762 | - | hypothetical protein                                                               |             |                                                                                                |
| fig 6666666.28482.peg.3772 | Contig_40 | 32903 | 35224 | + | ATP-dependent DNA<br>helicase UvrD/PcrA                                            | FIG00000372 | idu(1);CBSS-393121.3.peg.1913<br>idu(1);DNA_repair,_bacterial_UvrD_a<br>nd_related_helicases   |
| fig 6666666.28482.peg.3773 | Contig_40 | 35523 | 35221 | - | FIG01258277:<br>hypothetical protein                                               | FIG01258275 | ff                                                                                             |
| fig 6666666.28482.peg.3774 | Contig_40 | 36832 | 35774 | - | Phage peptidoglycan<br>binding endopeptidase                                       | FIG00821878 | ff                                                                                             |

|                            |           |       |       |   |                                                                       |             |                                                                                                                |
|----------------------------|-----------|-------|-------|---|-----------------------------------------------------------------------|-------------|----------------------------------------------------------------------------------------------------------------|
| fig 6666666.28482.peg.3775 | Contig_40 | 37179 | 36862 | - | hypothetical protein                                                  |             |                                                                                                                |
| fig 6666666.28482.peg.3776 | Contig_40 | 37228 | 38322 | + | Succinyl-CoA ligase [ADP-forming] beta chain (EC 6.2.1.5)             | FIG00000337 | icw(1);Serine-glyoxylate_cycle<br>icw(1);TCA_Cycle                                                             |
| fig 6666666.28482.peg.3777 | Contig_40 | 38337 | 39239 | + | Succinyl-CoA ligase [ADP-forming] alpha chain (EC 6.2.1.5)            | FIG00038611 | isu;Serine-glyoxylate_cycle<br>isu;TCA_Cycle                                                                   |
| fig 6666666.28482.peg.3778 | Contig_40 | 39632 | 39327 | - | PE_PGRS family protein                                                |             |                                                                                                                |
| fig 6666666.28482.peg.3779 | Contig_41 | 236   | 2533  | + | Transmembrane transport protein MmpL13b                               | FIG01314334 | ff                                                                                                             |
| fig 6666666.28482.peg.3780 | Contig_41 | 2785  | 2534  | - | hypothetical protein                                                  |             |                                                                                                                |
| fig 6666666.28482.peg.3781 | Contig_41 | 2889  | 3920  | + | Iron-sulfur cluster-binding protein                                   | FIG00000517 | ff                                                                                                             |
| fig 6666666.28482.peg.3782 | Contig_41 | 4497  | 5543  | + | Sulfate and thiosulfate binding protein CysP                          | FIG00001000 | idu(2);Cysteine_Biosynthesis<br>idu(2);Inorganic_Sulfur_Assimilation                                           |
| fig 6666666.28482.peg.3783 | Contig_41 | 5540  | 6430  | + | Sulfate transport system permease protein CysT                        | FIG00018897 | icw(2);Cysteine_Biosynthesis<br>icw(2);Inorganic_Sulfur_Assimilation                                           |
| fig 6666666.28482.peg.3784 | Contig_41 | 6427  | 7236  | + | Sulfate transport system permease protein CysW                        | FIG01272192 | icw(1);Cysteine_Biosynthesis<br>icw(1);Inorganic_Sulfur_Assimilation                                           |
| fig 6666666.28482.peg.3785 | Contig_41 | 7253  | 8314  | + | Sulfate and thiosulfate import ATP-binding protein CysA (EC 3.6.3.25) | FIG00000959 | idu(1);Uptake_of_selenate_and_selenite<br>icw(3);Cysteine_Biosynthesis<br>icw(3);Inorganic_Sulfur_Assimilation |
| fig 6666666.28482.peg.3786 | Contig_41 | 8622  | 8329  | - | protein of unknown function DUF732                                    |             |                                                                                                                |
| fig 6666666.28482.peg.3787 | Contig_41 | 9102  | 8728  | - | hypothetical protein                                                  |             |                                                                                                                |

|                            |           |       |       |   |                                                                        |             |                                                                                                                                                                         |
|----------------------------|-----------|-------|-------|---|------------------------------------------------------------------------|-------------|-------------------------------------------------------------------------------------------------------------------------------------------------------------------------|
| fig 6666666.28482.peg.3788 | Contig_41 | 9442  | 10308 | + | CDP-alcohol<br>phosphatidyltransferase                                 |             |                                                                                                                                                                         |
| fig 6666666.28482.peg.3789 | Contig_41 | 10305 | 10943 | + | 1-acyl-sn-glycerol-3-<br>phosphate<br>acyltransferase (EC<br>2.3.1.51) | FIG00005243 | idu(6);Glycerolipid_and_Glycerophos<br>pholipid_Metabolism_in_Bacteria<br>idu(6);Ribosome_post-<br>transcriptional_modification_and_chr<br>omosomal_segregation_cluster |
| fig 6666666.28482.peg.3790 | Contig_41 | 11855 | 10950 | - | Phosphatidate<br>cytidyltransferase (EC<br>2.7.7.41)                   | FIG00000097 | icw(1);Glycerolipid_and_Glycerophos<br>pholipid_Metabolism_in_Bacteria                                                                                                  |
| fig 6666666.28482.peg.3791 | Contig_41 | 12021 | 13826 | + | Asparagine synthetase<br>[glutamine-hydrolyzing]<br>(EC 6.3.5.4)       | FIG00035175 | idu(1);Glutamine,_Glutamate,_Aspart<br>ate_and_Aspargine_Biosynthesis<br>idu(1);Glutamate_and_Aspartate_upt<br>ake_in_Bacteria<br>icw(1);Cyanophycin_Metabolism         |
| fig 6666666.28482.peg.3792 | Contig_41 | 13823 | 15643 | + | Cyanophycin synthase<br>(EC 6.3.2.29)(EC 6.3.2.30)                     | FIG00003542 | isu;Cyanophycin_Metabolism                                                                                                                                              |
| fig 6666666.28482.peg.3793 | Contig_41 | 15697 | 17181 | + | sugar transporter                                                      | FIG00515631 | ff                                                                                                                                                                      |
| fig 6666666.28482.peg.3794 | Contig_41 | 17376 | 17819 | + | hypothetical protein                                                   |             |                                                                                                                                                                         |
| fig 6666666.28482.peg.3795 | Contig_41 | 17971 | 20148 | + | Glutamine synthetase<br>type III, GlnN (EC 6.3.1.2)                    | FIG00132839 | isu;Glutamine,_Glutamate,_Aspartat<br>e_and_Aspargine_Biosynthesis<br>isu;Ammonia_assimilation<br>isu;Glutamine_synthetases<br>isu;Peptidoglycan_Biosynthesis           |
| fig 6666666.28482.peg.3796 | Contig_41 | 20326 | 22293 | + | Serine/threonine protein<br>kinase (EC 2.7.11.1)                       | FIG00933379 | ff                                                                                                                                                                      |
| fig 6666666.28482.peg.3797 | Contig_41 | 22474 | 22809 | + | hypothetical protein                                                   |             |                                                                                                                                                                         |

|                            |           |       |       |   |                                                                                     |             |                                                                                                                                                  |
|----------------------------|-----------|-------|-------|---|-------------------------------------------------------------------------------------|-------------|--------------------------------------------------------------------------------------------------------------------------------------------------|
| fig 6666666.28482.peg.3798 | Contig_41 | 24658 | 22817 | - | Probable<br>serine/threonine-protein<br>kinase pknH (EC 2.7.11.1)                   | FIG00824811 | ff                                                                                                                                               |
| fig 6666666.28482.peg.3799 | Contig_41 | 25134 | 24796 | - | FIG00824585:<br>hypothetical protein                                                | FIG00824584 | ff                                                                                                                                               |
| fig 6666666.28482.peg.3800 | Contig_41 | 25375 | 25863 | + | FIG00820526:<br>hypothetical protein                                                | FIG00820525 | ff                                                                                                                                               |
| fig 6666666.28482.peg.3801 | Contig_41 | 26528 | 25869 | - | 5-amino-6-(5-<br>phosphoribosylamino)ura<br>cil reductase (EC<br>1.1.1.193) homolog | FIG00995439 | ff                                                                                                                                               |
| fig 6666666.28482.peg.3802 | Contig_41 | 27039 | 26542 | - | FIG00830308:<br>hypothetical protein                                                | FIG00830305 | ff                                                                                                                                               |
| fig 6666666.28482.peg.3803 | Contig_41 | 28282 | 27044 | - | amino acid permease<br>family protein                                               | FIG01308903 | ff                                                                                                                                               |
| fig 6666666.28482.peg.3804 | Contig_41 | 28360 | 29070 | + | Arsenate reductase (EC<br>1.20.4.1)                                                 | FIG00000770 | idu(5);Transcription_repair_cluster<br>idu(5);CBSS-315749.4.peg.3658<br>idu(5);Arsenic_resistance<br>idu(5);Anaerobic_respiratory_reducta<br>ses |
| fig 6666666.28482.peg.3805 | Contig_41 | 29067 | 30545 | + | Multicopper oxidase                                                                 | FIG00060246 | idu(2);Copper_homeostasis                                                                                                                        |
| fig 6666666.28482.peg.3806 | Contig_41 | 30575 | 32410 | + | Serine/threonine protein<br>kinase (EC 2.7.11.1)                                    | FIG00933379 | ff                                                                                                                                               |
| fig 6666666.28482.peg.3807 | Contig_41 | 32507 | 34408 | + | serine/threonine-protein<br>kinase PknE( EC:2.7.11.1 )                              |             |                                                                                                                                                  |
| fig 6666666.28482.peg.3808 | Contig_41 | 34528 | 35274 | + | hypothetical protein                                                                |             |                                                                                                                                                  |
| fig 6666666.28482.peg.3809 | Contig_41 | 36400 | 35264 | - | FIG00827535:<br>hypothetical protein                                                | FIG00827531 | ff                                                                                                                                               |
| fig 6666666.28482.peg.3810 | Contig_41 | 36615 | 37061 | + | hypothetical protein                                                                | FIG00638284 | ff                                                                                                                                               |

|                            |           |       |       |   |                                                                                 |             |                                                 |
|----------------------------|-----------|-------|-------|---|---------------------------------------------------------------------------------|-------------|-------------------------------------------------|
| fig 6666666.28482.peg.3811 | Contig_41 | 37128 | 37994 | + | FIG00820086:<br>hypothetical protein                                            | FIG00820085 | ff                                              |
| fig 6666666.28482.peg.3812 | Contig_41 | 37961 | 38881 | + | putative esterase                                                               | FIG00016132 | idu(2);Alpha-<br>Amylase_locus_in_Streptococcus |
| fig 6666666.28482.peg.3813 | Contig_41 | 39120 | 39359 | + | hypothetical protein                                                            |             |                                                 |
| fig 6666666.28482.peg.3814 | Contig_41 | 39892 | 40320 | + | hypothetical protein                                                            |             |                                                 |
| fig 6666666.28482.peg.3815 | Contig_41 | 40400 | 41074 | + | Transcriptional regulator, PadR family                                          | FIG00002474 | idu(4);CBSS-1352.1.peg.856                      |
| fig 6666666.28482.peg.3816 | Contig_41 | 42774 | 41071 | - | 3-oxosteroid 1-<br>dehydrogenase (EC<br>1.3.99.4)                               | FIG01318047 | ff                                              |
| fig 6666666.28482.peg.3817 | Contig_41 | 42875 | 43999 | + | Terminal oxygenase KshA                                                         | FIG01318144 | ff                                              |
| fig 6666666.28482.peg.3818 | Contig_41 | 43996 | 44304 | + | FIG00824565:<br>hypothetical protein                                            | FIG00824562 | ff                                              |
| fig 6666666.28482.peg.3819 | Contig_41 | 45188 | 44313 | - | Cyclopropane-fatty-acyl-<br>phospholipid synthase<br>(EC 2.1.1.79)              | FIG00001555 | ff                                              |
| fig 6666666.28482.peg.3820 | Contig_41 | 46148 | 45432 | - | FIG00831914:<br>hypothetical protein                                            | FIG00831905 | ff                                              |
| fig 6666666.28482.peg.3821 | Contig_41 | 47308 | 46232 | - | FIG00820875:<br>hypothetical protein                                            | FIG00820874 | ff                                              |
| fig 6666666.28482.peg.3822 | Contig_41 | 48271 | 47354 | - | LipH                                                                            | FIG01375311 | ff                                              |
| fig 6666666.28482.peg.3823 | Contig_41 | 49205 | 48339 | - | Short-chain<br>dehydrogenase/reductas<br>e SDR:Glucose/ribitol<br>dehydrogenase | FIG00862012 | ff                                              |
| fig 6666666.28482.peg.3824 | Contig_41 | 49681 | 49202 | - | FIG00821271:<br>hypothetical protein                                            | FIG00821270 | ff                                              |

|                            |           |       |       |   |                                                                                                                  |             |                                                                                                                                                            |
|----------------------------|-----------|-------|-------|---|------------------------------------------------------------------------------------------------------------------|-------------|------------------------------------------------------------------------------------------------------------------------------------------------------------|
| fig 6666666.28482.peg.3825 | Contig_41 | 51383 | 49782 | - | Long-chain-fatty-acid--<br>CoA ligase (EC 6.2.1.3)                                                               | FIG00018699 | idu(72);n-<br>Phenylalkanoic_acid_degradation<br>idu(72);Fatty_acid_metabolism_clust<br>er idu(72);Biotin_synthesis_cluster<br>idu(72);Biotin_biosynthesis |
| fig 6666666.28482.peg.3826 | Contig_41 | 51477 | 53408 | + | Cyclohexanone<br>monooxygenase (EC<br>1.14.13.22)                                                                | FIG00975774 | ff                                                                                                                                                         |
| fig 6666666.28482.peg.3827 | Contig_41 | 53438 | 54292 | + | Enoyl-[acyl-carrier-<br>protein] reductase<br>[NADPH] (EC 1.3.1.10)                                              | FIG00032108 | idu(2);Fatty_Acid_Biosynthesis_FASII                                                                                                                       |
| fig 6666666.28482.peg.3828 | Contig_41 | 54941 | 54294 | - | FIG00822739:<br>hypothetical protein                                                                             | FIG00822737 | ff                                                                                                                                                         |
| fig 6666666.28482.peg.3829 | Contig_41 | 55281 | 54934 | - | FIG00820833:<br>hypothetical protein                                                                             | FIG00820832 | ff                                                                                                                                                         |
| fig 6666666.28482.peg.3830 | Contig_41 | 56276 | 55350 | - | Esterase/lipase                                                                                                  | FIG00932446 | ff                                                                                                                                                         |
| fig 6666666.28482.peg.3831 | Contig_41 | 57082 | 56273 | - | Transcriptional regulator,<br>IcIR family                                                                        | FIG00022569 | idu(12);Homogentisate_pathway_of_<br>aromatic_compound_degradation                                                                                         |
| fig 6666666.28482.peg.3832 | Contig_41 | 57671 | 57228 | - | hypothetical protein                                                                                             |             |                                                                                                                                                            |
| fig 6666666.28482.peg.3833 | Contig_41 | 59151 | 57685 | - | fumarate<br>reductase/succinate<br>dehydrogenase<br>flavoprotein, N-<br>terminal:FAD dependent<br>oxidoreductase | FIG00141996 | idu(1);Succinate_dehydrogenase                                                                                                                             |
| fig 6666666.28482.peg.3834 | Contig_41 | 60056 | 59148 | - | 2,3-dihydroxybiphenyl<br>1,2-dioxygenase (EC<br>1.13.11.39)                                                      | FIG01272995 | isu;Aromatic_dioxygenase_mess<br>isu;Biphenyl_Degradation<br>isu;Dioxygenases_(EC_1.13.11.-)                                                               |

|                            |           |       |       |   |                           |             |                                  |
|----------------------------|-----------|-------|-------|---|---------------------------|-------------|----------------------------------|
| fig 6666666.28482.peg.3835 | Contig_41 | 61261 | 60077 | - | hydroxylase               | FIG01000257 | ff                               |
| fig 6666666.28482.peg.3836 | Contig_41 | 62207 | 61416 | - | FIG00821553:              | FIG00821552 | ff                               |
|                            |           |       |       |   | hypothetical protein      |             |                                  |
| fig 6666666.28482.peg.3837 | Contig_41 | 63829 | 62228 | - | Cyclohexanone             | FIG00975774 | ff                               |
|                            |           |       |       |   | monooxygenase (EC         |             |                                  |
|                            |           |       |       |   | 1.14.13.22)               |             |                                  |
| fig 6666666.28482.peg.3838 | Contig_41 | 64015 | 64302 | + | oxidoreductase,           |             |                                  |
|                            |           |       |       |   | NAD/FAD-binding           |             |                                  |
| fig 6666666.28482.peg.3839 | Contig_41 | 64309 | 65142 | + | FIG00825001:              | FIG00824997 | ff                               |
|                            |           |       |       |   | hypothetical protein      |             |                                  |
| fig 6666666.28482.peg.3840 | Contig_41 | 65151 | 65942 | + | Short chain               | FIG00830516 | ff                               |
|                            |           |       |       |   | oxidoreductase            |             |                                  |
| fig 6666666.28482.peg.3841 | Contig_41 | 65939 | 66811 | + | luciferase family protein |             |                                  |
| fig 6666666.28482.peg.3842 | Contig_41 | 66808 | 67311 | + | hypothetical protein      |             |                                  |
| fig 6666666.28482.peg.3843 | Contig_41 | 67390 | 67977 | + | hypothetical protein      |             |                                  |
| fig 6666666.28482.peg.3844 | Contig_41 | 68107 | 69378 | + | FIG00827177:              | FIG00827174 | ff                               |
|                            |           |       |       |   | hypothetical protein      |             |                                  |
| fig 6666666.28482.peg.3845 | Contig_41 | 70299 | 69430 | - | 2-hydroxymuconic          | FIG00042074 | idu(1);Central_meta-             |
|                            |           |       |       |   | semialdehyde hydrolase    |             | cleavage_pathway_of_aromatic_com |
|                            |           |       |       |   | (EC 3.7.1.9)              |             | pound_degradation                |
| fig 6666666.28482.peg.3846 | Contig_41 | 70374 | 70811 | + | hypothetical protein      |             |                                  |
| fig 6666666.28482.peg.3847 | Contig_41 | 72298 | 70910 | - | FIG00828809:              | FIG00828807 | ff                               |
|                            |           |       |       |   | hypothetical protein      |             |                                  |
| fig 6666666.28482.peg.3848 | Contig_41 | 72937 | 72503 | - | FIG00828690:              | FIG00828686 | ff                               |
|                            |           |       |       |   | hypothetical protein      |             |                                  |
| fig 6666666.28482.peg.3849 | Contig_41 | 73161 | 72979 | - | hypothetical protein      |             |                                  |
| fig 6666666.28482.peg.3850 | Contig_41 | 73282 | 73707 | + | pyridoxamine 5'-          |             |                                  |
|                            |           |       |       |   | phosphate oxidase-        |             |                                  |
|                            |           |       |       |   | related, FMN-binding      |             |                                  |
| fig 6666666.28482.peg.3851 | Contig_41 | 74758 | 73832 | - | FIG00830838:              | FIG00830837 | ff                               |
|                            |           |       |       |   | hypothetical protein      |             |                                  |

|                            |           |       |       |   |                                                                      |             |                            |
|----------------------------|-----------|-------|-------|---|----------------------------------------------------------------------|-------------|----------------------------|
| fig 6666666.28482.peg.3852 | Contig_41 | 74831 | 77065 | + | Formate dehydrogenase- O, major subunit (EC 1.2.1.2)                 | FIG00011659 | idu(1);Formate_hydrogenase |
| fig 6666666.28482.peg.3853 | Contig_41 | 77167 | 77466 | + | hypothetical protein                                                 |             |                            |
| fig 6666666.28482.peg.3854 | Contig_41 | 78346 | 77495 | - | short chain dehydrogenase                                            |             |                            |
| fig 6666666.28482.peg.3855 | Contig_41 | 78623 | 79711 | + | esterase                                                             | FIG01380254 | ff                         |
| fig 6666666.28482.peg.3856 | Contig_41 | 79876 | 79712 | - | hypothetical protein                                                 |             |                            |
| fig 6666666.28482.peg.3857 | Contig_41 | 79904 | 82441 | + | Probable conserved transmembrane ATP-binding protein ABC transporter | FIG01323737 | ff                         |
| fig 6666666.28482.peg.3858 | Contig_41 | 82721 | 82557 | - | FIG00825214: hypothetical protein                                    | FIG00825212 | ff                         |
| fig 6666666.28482.peg.3859 | Contig_41 | 83808 | 82822 | - | hypothetical protein                                                 | FIG00638284 | ff                         |
| fig 6666666.28482.peg.3860 | Contig_41 | 84380 | 83811 | - | Carboxymuconolactone decarboxylase                                   |             |                            |
| fig 6666666.28482.peg.3861 | Contig_41 | 85259 | 84435 | - | hypothetical protein                                                 |             |                            |
| fig 6666666.28482.peg.3862 | Contig_41 | 85864 | 85256 | - | Transcriptional regulator, TetR family                               | FIG00554417 | ff                         |
| fig 6666666.28482.peg.3863 | Contig_41 | 86026 | 87204 | + | FIG00824975: hypothetical protein                                    | FIG00824974 | ff                         |
| fig 6666666.28482.peg.3864 | Contig_41 | 87194 | 88303 | + | FIG00825789: hypothetical protein                                    | FIG00825788 | ff                         |
| fig 6666666.28482.peg.3865 | Contig_41 | 88296 | 88796 | + | FIG00823936: hypothetical protein                                    | FIG00823935 | ff                         |
| fig 6666666.28482.peg.3866 | Contig_41 | 88804 | 89247 | + | FIG00831340: hypothetical protein                                    | FIG00831338 | ff                         |
| fig 6666666.28482.peg.3867 | Contig_41 | 89244 | 90446 | + | FIG00827145: hypothetical protein                                    | FIG00827143 | ff                         |
| fig 6666666.28482.peg.3868 | Contig_41 | 90448 | 90855 | + | FIG00821070: hypothetical protein                                    | FIG00821069 | ff                         |

|                            |           |        |        |   |                                                                              |             |                                                                                                                                                            |
|----------------------------|-----------|--------|--------|---|------------------------------------------------------------------------------|-------------|------------------------------------------------------------------------------------------------------------------------------------------------------------|
| fig 6666666.28482.peg.3869 | Contig_41 | 90879  | 91838  | + | Esterase/lipase                                                              | FIG00932446 | ff                                                                                                                                                         |
| fig 6666666.28482.peg.3870 | Contig_41 | 91835  | 93433  | + | FIG00820978:<br>hypothetical protein                                         | FIG00820973 | ff                                                                                                                                                         |
| fig 6666666.28482.peg.3871 | Contig_41 | 93430  | 95007  | + | Long-chain-fatty-acid--<br>CoA ligase (EC 6.2.1.3)                           | FIG00018699 | idu(72);n-<br>Phenylalkanoic_acid_degradation<br>idu(72);Fatty_acid_metabolism_clust<br>er idu(72);Biotin_synthesis_cluster<br>idu(72);Biotin_biosynthesis |
| fig 6666666.28482.peg.3872 | Contig_41 | 96172  | 95009  | - | hypothetical protein                                                         |             |                                                                                                                                                            |
| fig 6666666.28482.peg.3873 | Contig_41 | 96708  | 96205  | - | hypothetical protein                                                         |             |                                                                                                                                                            |
| fig 6666666.28482.peg.3874 | Contig_41 | 97146  | 96709  | - | hypothetical protein                                                         |             |                                                                                                                                                            |
| fig 6666666.28482.peg.3875 | Contig_41 | 97278  | 99539  | + | Transmembrane<br>transport protein<br>MmpL13b                                | FIG01314334 | ff                                                                                                                                                         |
| fig 6666666.28482.peg.3876 | Contig_41 | 100582 | 99731  | - | integral membrane<br>protein                                                 |             |                                                                                                                                                            |
| fig 6666666.28482.peg.3877 | Contig_41 | 101022 | 100675 | - | hypothetical protein                                                         |             |                                                                                                                                                            |
| fig 6666666.28482.peg.3878 | Contig_41 | 101522 | 101049 | - | hypothetical protein                                                         |             |                                                                                                                                                            |
| fig 6666666.28482.peg.3879 | Contig_41 | 101622 | 101915 | + | hypothetical protein                                                         |             |                                                                                                                                                            |
| fig 6666666.28482.peg.3880 | Contig_41 | 101965 | 103578 | + | Long-chain-fatty-acid--<br>CoA ligase (EC 6.2.1.3)                           | FIG00018699 | idu(72);n-<br>Phenylalkanoic_acid_degradation<br>idu(72);Fatty_acid_metabolism_clust<br>er idu(72);Biotin_synthesis_cluster<br>idu(72);Biotin_biosynthesis |
| fig 6666666.28482.peg.3881 | Contig_41 | 103565 | 104338 | + | Ribulose-5-phosphate 4-<br>epimerase and related<br>epimerases and aldolases | FIG00004579 | ff                                                                                                                                                         |
| fig 6666666.28482.peg.3882 | Contig_41 | 104464 | 105732 | + | amidohydrolase                                                               | FIG01338948 | ff                                                                                                                                                         |

|                            |           |        |        |   |                                                |             |                                                                                                                                                                            |
|----------------------------|-----------|--------|--------|---|------------------------------------------------|-------------|----------------------------------------------------------------------------------------------------------------------------------------------------------------------------|
| fig 6666666.28482.peg.3883 | Contig_41 | 106025 | 105729 | - | hypothetical protein                           |             |                                                                                                                                                                            |
| fig 6666666.28482.peg.3884 | Contig_41 | 106232 | 106080 | - | hypothetical protein                           |             |                                                                                                                                                                            |
| fig 6666666.28482.peg.3885 | Contig_41 | 106270 | 107424 | + | serine/threonine protein kinase                |             |                                                                                                                                                                            |
| fig 6666666.28482.peg.3886 | Contig_41 | 107579 | 108574 | + | putative hydrolase                             |             |                                                                                                                                                                            |
| fig 6666666.28482.peg.3887 | Contig_41 | 108717 | 108941 | + | hypothetical protein                           |             |                                                                                                                                                                            |
| fig 6666666.28482.peg.3888 | Contig_41 | 109986 | 108967 | - | 2-nitropropane dioxygenase (EC 1.13.11.32)     | FIG01304356 | idu(5);CBSS-164757.7.peg.5020                                                                                                                                              |
| fig 6666666.28482.peg.3889 | Contig_41 | 110085 | 111686 | + | Arylsulfatase (EC 3.1.6.1)                     | FIG00016566 | idu(3);Sulfatases_and_sulfatase_modifying_factor_1<br>idu(3);Galactosylceramide_and_Sulfatide_metabolism<br>idu(3);Steroid_sulfates<br>idu(3);Alkanesulfonate_assimilation |
| fig 6666666.28482.peg.3890 | Contig_41 | 111743 | 112741 | + | NAD binding oxidoreductase                     | FIG01609121 | ff                                                                                                                                                                         |
| fig 6666666.28482.peg.3891 | Contig_41 | 112749 | 113816 | + | hypothetical protein                           |             |                                                                                                                                                                            |
| fig 6666666.28482.peg.3892 | Contig_41 | 114710 | 113898 | - | conserved hypothetical protein                 |             |                                                                                                                                                                            |
| fig 6666666.28482.peg.3893 | Contig_41 | 115252 | 114710 | - | protein export protein SecD, putative          |             |                                                                                                                                                                            |
| fig 6666666.28482.peg.3894 | Contig_41 | 115425 | 116117 | + | transcriptional regulator, TetR family protein | FIG00869404 | ff                                                                                                                                                                         |
| fig 6666666.28482.peg.3895 | Contig_41 | 116241 | 117443 | + | putative cytochrome P450 hydroxylase           | FIG00032437 | idu(49);Nitric_oxide_synthase                                                                                                                                              |
| fig 6666666.28482.peg.3896 | Contig_41 | 117443 | 118279 | + | FIG00828457: hypothetical protein              | FIG00828455 | ff                                                                                                                                                                         |

|                            |           |        |        |   |                                                                    |             |                                                                                                               |
|----------------------------|-----------|--------|--------|---|--------------------------------------------------------------------|-------------|---------------------------------------------------------------------------------------------------------------|
| fig 6666666.28482.peg.3897 | Contig_41 | 118295 | 119263 | + | Naphthoate synthase (EC 4.1.3.36)                                  | FIG00071623 | idu(2);Menaquinone_and_Phylloquinone_Biosynthesis_--_gjo<br>idu(2);Menaquinone_and_Phylloquinone_Biosynthesis |
| fig 6666666.28482.peg.3898 | Contig_41 | 119283 | 121619 | + | FIG00824362:<br>hypothetical protein                               | FIG00824361 | ff                                                                                                            |
| fig 6666666.28482.peg.3899 | Contig_41 | 121616 | 122377 | + | clavaldehyde<br>dehydrogenase                                      | FIG00144627 | idu(1);Clavulanic_acid_biosynthesis                                                                           |
| fig 6666666.28482.peg.3900 | Contig_41 | 122374 | 123627 | + | FIG00828983:<br>hypothetical protein                               | FIG00828976 | ff                                                                                                            |
| fig 6666666.28482.peg.3901 | Contig_41 | 123690 | 125054 | + | Partial REP13E12 repeat<br>protein                                 | FIG00820827 | ff                                                                                                            |
| fig 6666666.28482.peg.3902 | Contig_41 | 126483 | 125365 | - | hypothetical protein                                               |             |                                                                                                               |
| fig 6666666.28482.peg.3903 | Contig_41 | 127717 | 126473 | - | FIG00826794:<br>hypothetical protein                               | FIG00826792 | ff                                                                                                            |
| fig 6666666.28482.peg.3904 | Contig_41 | 128881 | 127718 | - | BarH                                                               | FIG00668014 | ff                                                                                                            |
| fig 6666666.28482.peg.3905 | Contig_41 | 129845 | 128889 | - | short chain<br>dehydrogenase                                       | FIG01311525 | ff                                                                                                            |
| fig 6666666.28482.peg.3906 | Contig_41 | 131077 | 129842 | - | putative cytochrome<br>P450 hydroxylase                            | FIG00032437 | idu(49);Nitric_oxide_synthase                                                                                 |
| fig 6666666.28482.peg.3907 | Contig_41 | 131751 | 131074 | - | Transcriptional regulator,<br>TetR family                          | FIG00554417 | ff                                                                                                            |
| fig 6666666.28482.peg.3908 | Contig_41 | 131980 | 132456 | + | FIG00828429:<br>hypothetical protein                               | FIG00828428 | ff                                                                                                            |
| fig 6666666.28482.peg.3909 | Contig_41 | 132580 | 132464 | - | hypothetical protein                                               |             |                                                                                                               |
| fig 6666666.28482.peg.3910 | Contig_41 | 132736 | 132909 | + | hypothetical protein                                               |             |                                                                                                               |
| fig 6666666.28482.peg.3911 | Contig_41 | 134214 | 133258 | - | Beta-lactamase class C<br>and other penicillin<br>binding proteins | FIG00000681 | idu(2);Beta-lactamase                                                                                         |
| fig 6666666.28482.peg.3912 | Contig_42 | 200    | 865    | + | YkuD domain-containing<br>hypothetical lipoprotein                 | FIG01375022 | ff                                                                                                            |

|                            |           |       |       |   |                                                      |             |                              |
|----------------------------|-----------|-------|-------|---|------------------------------------------------------|-------------|------------------------------|
| fig 6666666.28482.peg.3913 | Contig_42 | 972   | 1559  | + | Transcriptional regulator, TetR family               | FIG00554417 | ff                           |
| fig 6666666.28482.peg.3914 | Contig_42 | 1556  | 3805  | + | Formate dehydrogenase- O, major subunit (EC 1.2.1.2) | FIG00011659 | idu(1);Formate_hydrogenase   |
| fig 6666666.28482.peg.3915 | Contig_42 | 5839  | 3854  | - | Metallopeptidase                                     | FIG01213213 | ff                           |
| fig 6666666.28482.peg.3916 | Contig_42 | 5882  | 6529  | + | Possible membrane protein                            | FIG01121868 | ff                           |
| fig 6666666.28482.peg.3917 | Contig_42 | 6526  | 7215  | + | Possible membrane protein                            | FIG01121868 | ff                           |
| fig 6666666.28482.peg.3918 | Contig_42 | 7744  | 7220  | - | FIG00821048: hypothetical protein                    | FIG00821047 | ff                           |
| fig 6666666.28482.peg.3919 | Contig_42 | 10758 | 7741  | - | Transmembrane transport protein MmpL13               | FIG00821827 | ff                           |
| fig 6666666.28482.peg.3920 | Contig_42 | 11080 | 11601 | + | POSSIBLE EXPORTED PROTEIN                            | FIG01386146 | ff                           |
| fig 6666666.28482.peg.3921 | Contig_42 | 12806 | 11634 | - | Possible membrane protein                            | FIG01121868 | ff                           |
| fig 6666666.28482.peg.3922 | Contig_42 | 12955 | 14112 | + | Possible membrane protein                            | FIG01121868 | ff                           |
| fig 6666666.28482.peg.3923 | Contig_42 | 16918 | 14120 | - | Transmembrane transport protein MmpL5                | FIG01001691 | ff                           |
| fig 6666666.28482.peg.3924 | Contig_42 | 17702 | 16992 | - | FIG01001556: hypothetical protein                    | FIG00820731 | ff                           |
| fig 6666666.28482.peg.3925 | Contig_42 | 18445 | 17720 | - | tRNA (guanine46-N7-)-methyltransferase (EC 2.1.1.33) | FIG00002733 | isu;RNA_methylation          |
| fig 6666666.28482.peg.3926 | Contig_42 | 18699 | 19784 | + | FIG032248: hypothetical protein                      | FIG00032248 | icw(1);CBSS-336982.3.peg.219 |

|                            |           |       |       |   |                                                                     |             |                                                                                                                                                       |
|----------------------------|-----------|-------|-------|---|---------------------------------------------------------------------|-------------|-------------------------------------------------------------------------------------------------------------------------------------------------------|
| fig 6666666.28482.peg.3927 | Contig_42 | 19742 | 21292 | + | FIG033897: hypothetical protein                                     | FIG00033897 | isu;CBSS-336982.3.peg.219                                                                                                                             |
| fig 6666666.28482.peg.3928 | Contig_42 | 21476 | 23302 | + | Phosphoenolpyruvate carboxykinase [GTP] (EC 4.1.1.32)               | FIG00001643 | icw(2);CBSS-336982.3.peg.219<br>isu;Pyruvate_metabolism_l:_anapler<br>otic_reactions,_PEP                                                             |
| fig 6666666.28482.peg.3929 | Contig_42 | 23855 | 23379 | - | Redox-sensitive transcriptional activator SoxR                      | FIG00004255 | isu;Oxidative_stress                                                                                                                                  |
| fig 6666666.28482.peg.3930 | Contig_42 | 23917 | 24630 | + | possible short chain dehydrogenase                                  | FIG00995056 | ff                                                                                                                                                    |
| fig 6666666.28482.peg.3931 | Contig_42 | 24627 | 25658 | + | S-adenosylmethionine:tRNA ribosyltransferase-isomerase (EC 5.-.-.-) | FIG00000334 | ff                                                                                                                                                    |
| fig 6666666.28482.peg.3932 | Contig_42 | 25692 | 27218 | + | Long-chain-fatty-acid--CoA ligase (EC 6.2.1.3)                      | FIG00018699 | idu(72);n-Phenylalkanoic_acid_degradation<br>idu(72);Fatty_acid_metabolism_cluster<br>idu(72);Biotin_synthesis_cluster<br>idu(72);Biotin_biosynthesis |
| fig 6666666.28482.peg.3933 | Contig_42 | 27215 | 28177 | + | Enoyl-CoA hydratase [valine degradation] (EC 4.2.1.17)              | FIG00014562 | icw(1);Valine_degradation                                                                                                                             |
| fig 6666666.28482.peg.3934 | Contig_42 | 28625 | 28197 | - | FIG00824252: hypothetical protein                                   | FIG00824247 | ff                                                                                                                                                    |

|                            |           |       |       |   |                                                            |             |                                                                                                                                                                                                                            |
|----------------------------|-----------|-------|-------|---|------------------------------------------------------------|-------------|----------------------------------------------------------------------------------------------------------------------------------------------------------------------------------------------------------------------------|
| fig 6666666.28482.peg.3935 | Contig_42 | 29830 | 28703 | - | Butyryl-CoA dehydrogenase (EC 1.3.99.2)                    | FIG00009149 | idu(39);Isoleucine_degradation<br>idu(39);Lysine_fermentation<br>idu(39);Butanol_Biosynthesis<br>idu(39);Acetyl-CoA_fermentation_to_Butyrate<br>idu(39);Valine_degradation<br>idu(39);Anaerobic_respiratory_reduc<br>tases |
| fig 6666666.28482.peg.3936 | Contig_42 | 29879 | 30874 | + | FIG024080: hypothetical protein                            | FIG00823305 | ff                                                                                                                                                                                                                         |
| fig 6666666.28482.peg.3937 | Contig_42 | 30900 | 32099 | + | FIG00820062: hypothetical protein                          | FIG00820061 | ff                                                                                                                                                                                                                         |
| fig 6666666.28482.peg.3938 | Contig_42 | 32093 | 33397 | + | FIG00821918: hypothetical protein                          | FIG00821917 | ff                                                                                                                                                                                                                         |
| fig 6666666.28482.peg.3939 | Contig_42 | 34307 | 33405 | - | Esterase LipW                                              | FIG00821483 | ff                                                                                                                                                                                                                         |
| fig 6666666.28482.peg.3940 | Contig_42 | 34512 | 36626 | + | Assimilatory nitrate reductase large subunit (EC:1.7.99.4) | FIG00059898 | idu(1);Nitrate_and_nitrite_ammonific<br>ation                                                                                                                                                                              |
| fig 6666666.28482.peg.3941 | Contig_42 | 36623 | 36976 | + | hypothetical protein                                       |             |                                                                                                                                                                                                                            |
| fig 6666666.28482.peg.3942 | Contig_42 | 36995 | 39514 | + | Nitrite reductase [NAD(P)H] large subunit (EC 1.7.1.4)     | FIG00000873 | icw(1);Nitrate_and_nitrite_ammonifi<br>cation                                                                                                                                                                              |
| fig 6666666.28482.peg.3943 | Contig_42 | 39511 | 39870 | + | Rieske (2Fe-2S) domain protein                             |             |                                                                                                                                                                                                                            |
| fig 6666666.28482.peg.3944 | Contig_42 | 40085 | 40738 | + | Methyltransferase type 12                                  |             |                                                                                                                                                                                                                            |
| fig 6666666.28482.peg.3945 | Contig_42 | 40735 | 42024 | + | PROBABLE CONSERVED TRANSMEMBRANE PROTEIN                   | FIG00662132 | ff                                                                                                                                                                                                                         |

|                            |           |       |       |   |                                                       |             |                                                                                                                                                                                                                                                                                                                                                           |
|----------------------------|-----------|-------|-------|---|-------------------------------------------------------|-------------|-----------------------------------------------------------------------------------------------------------------------------------------------------------------------------------------------------------------------------------------------------------------------------------------------------------------------------------------------------------|
| fig 6666666.28482.peg.3946 | Contig_42 | 42026 | 42523 | + | PROBABLE CONSERVED<br>TRANSMEMBRANE<br>PROTEIN        | FIG00662132 | ff                                                                                                                                                                                                                                                                                                                                                        |
| fig 6666666.28482.peg.3947 | Contig_42 | 42666 | 43838 | + | Esterase LipC                                         | FIG00824527 | ff                                                                                                                                                                                                                                                                                                                                                        |
| fig 6666666.28482.peg.3948 | Contig_42 | 43883 | 45292 | + | Diacylglycerol O-<br>acyltransferase (EC<br>2.3.1.20) | FIG01344808 | ff                                                                                                                                                                                                                                                                                                                                                        |
| fig 6666666.28482.peg.3949 | Contig_42 | 45401 | 46183 | + | Enoyl-CoA hydratase (EC<br>4.2.1.17)                  | FIG00033206 | icw(1);n-<br>Phenylalkanoic_acid_degradation<br>idu(51);Polyhydroxybutyrate_metabo<br>lism idu(51);Isoleucine_degradation<br>icw(1);Fatty_acid_metabolism_cluste<br>r idu(51);Lysine_fermentation<br>idu(51);Butanol_Biosynthesis<br>idu(51);Acetyl-<br>CoA_fermentation_to_Butyrate<br>idu(51);Valine_degradation<br>idu(51);Butyrate_metabolism_cluster |
| fig 6666666.28482.peg.3950 | Contig_42 | 46770 | 46180 | - | Transcriptional regulator, TetR family                | FIG00554417 | ff                                                                                                                                                                                                                                                                                                                                                        |
| fig 6666666.28482.peg.3951 | Contig_42 | 46873 | 47412 | + | hypothetical protein                                  |             |                                                                                                                                                                                                                                                                                                                                                           |
| fig 6666666.28482.peg.3952 | Contig_42 | 47479 | 48978 | + | Long-chain-fatty-acid--<br>CoA ligase (EC 6.2.1.3)    | FIG00018699 | idu(72);n-<br>Phenylalkanoic_acid_degradation<br>idu(72);Fatty_acid_metabolism_clust<br>er idu(72);Biotin_synthesis_cluster<br>idu(72);Biotin_biosynthesis                                                                                                                                                                                                |

|                            |           |       |       |   |                                                               |             |                                                                          |
|----------------------------|-----------|-------|-------|---|---------------------------------------------------------------|-------------|--------------------------------------------------------------------------|
| fig 6666666.28482.peg.3953 | Contig_42 | 48975 | 49271 | + | FIG00826455:<br>hypothetical protein                          | FIG00826454 | ff                                                                       |
| fig 6666666.28482.peg.3954 | Contig_42 | 50731 | 49289 | - | hypothetical protein                                          | FIG00638284 | ff                                                                       |
| fig 6666666.28482.peg.3955 | Contig_42 | 52353 | 50956 | - | PE-PGRS family protein                                        |             | idu(16);PPE_gene_cluster_in_Mycobacteria                                 |
| fig 6666666.28482.peg.3956 | Contig_42 | 53914 | 52487 | - | PE-PGRS FAMILY<br>PROTEIN                                     |             |                                                                          |
| fig 6666666.28482.peg.3957 | Contig_42 | 55453 | 54002 | - | PE-PGRS FAMILY<br>PROTEIN                                     |             |                                                                          |
| fig 6666666.28482.peg.3958 | Contig_42 | 56219 | 55587 | - | Transcriptional regulator, TetR family                        | FIG00554417 | ff                                                                       |
| fig 6666666.28482.peg.3959 | Contig_42 | 56374 | 56243 | - | FIG00823468:<br>hypothetical protein                          | FIG00823464 | ff                                                                       |
| fig 6666666.28482.peg.3960 | Contig_43 | 2114  | 1218  | - | FIG00820338:<br>hypothetical protein                          | FIG00820337 | ff                                                                       |
| fig 6666666.28482.peg.3961 | Contig_43 | 2186  | 2890  | + | Transcriptional regulator, TetR family                        | FIG00554417 | ff                                                                       |
| fig 6666666.28482.peg.3962 | Contig_43 | 3990  | 3409  | - | Glyoxalase family protein                                     | FIG01955890 | ff                                                                       |
| fig 6666666.28482.peg.3963 | Contig_43 | 4083  | 4727  | + | Transcriptional regulator, TetR family                        | FIG00554417 | ff                                                                       |
| fig 6666666.28482.peg.3964 | Contig_43 | 4751  | 5857  | + | FIG00820646:<br>hypothetical protein                          | FIG00820644 | ff                                                                       |
| fig 6666666.28482.peg.3965 | Contig_43 | 5848  | 6804  | + | D-3-phosphoglycerate dehydrogenase (EC 1.1.1.95)              | FIG00031250 | idu(4);Serine_Biosynthesis<br>idu(4);Pyridoxin_(Vitamin_B6)_Biosynthesis |
| fig 6666666.28482.peg.3966 | Contig_43 | 6860  | 9061  | + | putative acyl-CoA dehydrogenase                               |             |                                                                          |
| fig 6666666.28482.peg.3967 | Contig_44 | 151   | 1104  | + | Glutamate-ammonia-ligase<br>adenylyltransferase (EC 2.7.7.42) | FIG00006278 | isu;Ammonia_assimilation isu;CBSS-316057.3.peg.3521                      |

|                            |           |      |      |   |                                                                        |             |                                                                                                                                                                        |
|----------------------------|-----------|------|------|---|------------------------------------------------------------------------|-------------|------------------------------------------------------------------------------------------------------------------------------------------------------------------------|
| fig 6666666.28482.peg.3968 | Contig_44 | 1122 | 1748 | + | FIG00822716:<br>hypothetical protein                                   | FIG00822713 | ff                                                                                                                                                                     |
| fig 6666666.28482.peg.3969 | Contig_44 | 1745 | 2605 | + | FIG00820321:<br>hypothetical protein                                   | FIG00820319 | ff                                                                                                                                                                     |
| fig 6666666.28482.peg.3970 | Contig_44 | 2615 | 2833 | + | hypothetical protein                                                   |             |                                                                                                                                                                        |
| fig 6666666.28482.peg.3971 | Contig_44 | 3511 | 3888 | + | hypothetical protein                                                   |             |                                                                                                                                                                        |
| fig 6666666.28482.peg.3972 | Contig_44 | 5471 | 4035 | - | Glutamine synthetase<br>type I (EC 6.3.1.2)                            | FIG00134889 | idu(2);Glutamine,_Glutamate,_Aspartate_and_Asparagine_Biosynthesis<br>icw(1);Ammonia_assimilation<br>idu(2);Glutamine_synthetases<br>idu(2);Peptidoglycan_Biosynthesis |
| fig 6666666.28482.peg.3973 | Contig_44 | 5721 | 6152 | + | PROBABLE MEMBRANE<br>PROTEIN                                           | FIG00816212 | ff                                                                                                                                                                     |
| fig 6666666.28482.peg.3974 | Contig_44 | 6911 | 6159 | - | Transmembrane protein<br>MT2276, clustered with<br>lipoate gene        | FIG00006368 | ff                                                                                                                                                                     |
| fig 6666666.28482.peg.3975 | Contig_44 | 7884 | 6952 | - | Lipoate synthase                                                       | FIG00000362 | icw(1);Lipoic_acid_synthesis_cluster<br>icw(1);Lipoic_acid_metabolism                                                                                                  |
| fig 6666666.28482.peg.3976 | Contig_44 | 8579 | 7881 | - | Octanoate-[acyl-carrier-<br>protein]-protein-N-<br>octanoyltransferase | FIG00000528 | isu;Lipoic_acid_synthesis_cluster<br>isu;Lipoic_acid_metabolism                                                                                                        |
| fig 6666666.28482.peg.3977 | Contig_44 | 9537 | 8626 | - | Cell division inhibitor                                                | FIG00002048 | idu(1);CBSS-83333.1.peg.946<br>idu(1);Persister_Cells                                                                                                                  |

|                            |           |       |       |   |                                                                                                                   |             |                                                                                                                                                       |
|----------------------------|-----------|-------|-------|---|-------------------------------------------------------------------------------------------------------------------|-------------|-------------------------------------------------------------------------------------------------------------------------------------------------------|
| fig 6666666.28482.peg.3978 | Contig_44 | 11326 | 9542  | - | Dihydrolipoamide acyltransferase component of branched-chain alpha-keto acid dehydrogenase complex (EC 2.3.1.168) | FIG01304883 | idu(1);Isoleucine_degradation<br>idu(1);Leucine_Degradation_and_HM<br>G-CoA_Metabolism<br>idu(1);Valine_degradation<br>idu(1);Dehydrogenase_complexes |
| fig 6666666.28482.peg.3979 | Contig_44 | 11504 | 13276 | + | Oxidoreductase, short-chain dehydrogenase/reductase family (EC 1.1.1.-)                                           | FIG01955289 | idu(2);CBSS-291331.3.peg.3674<br>idu(2);Capsular_Polysaccharides_Biosynthesis_and_Assembly                                                            |
| fig 6666666.28482.peg.3980 | Contig_44 | 13728 | 13384 | - | FIG00825986: hypothetical protein                                                                                 | FIG00825983 | ff                                                                                                                                                    |
| fig 6666666.28482.peg.3981 | Contig_44 | 13853 | 14308 | + | hypothetical protein                                                                                              |             |                                                                                                                                                       |
| fig 6666666.28482.peg.3982 | Contig_44 | 14313 | 15905 | + | Phytoene dehydrogenase and related proteins                                                                       | FIG00139162 | ff                                                                                                                                                    |
| fig 6666666.28482.peg.3983 | Contig_44 | 17536 | 15989 | - | Cytosol aminopeptidase PepA (EC 3.4.11.1)                                                                         | FIG00000336 | isu;Aminopeptidases_(EC_3.4.11.-)<br>isu;Dehydrogenase_complexes                                                                                      |
| fig 6666666.28482.peg.3984 | Contig_44 | 18672 | 17548 | - | Adenylate cyclase (EC 4.6.1.1)                                                                                    | FIG00001294 | idu(25);cAMP_signaling_in_bacteria                                                                                                                    |
| fig 6666666.28482.peg.3985 | Contig_44 | 18766 | 19869 | + | Aminomethyltransferase (glycine cleavage system T protein) (EC 2.1.2.10)                                          | FIG00138538 | isu;Photorespiration_(oxidative_C2_cycle)<br>isu;CBSS-87626.3.peg.3639<br>isu;Glycine_cleavage_system                                                 |

|                            |           |       |       |   |                                                                                      |             |                                                                                                                                                                                                                                                              |
|----------------------------|-----------|-------|-------|---|--------------------------------------------------------------------------------------|-------------|--------------------------------------------------------------------------------------------------------------------------------------------------------------------------------------------------------------------------------------------------------------|
| fig 6666666.28482.peg.3986 | Contig_44 | 19921 | 21027 | + | Branched-chain amino acid aminotransferase (EC 2.6.1.42)                             | FIG00050603 | isu;Branched-Chain_Amino_Acid_Biosynthesis<br>isu;Pyruvate_Alanine_Serine_Interconversions<br>isu;Isoleucine_degradation<br>isu;Alanine_biosynthesis<br>isu;Leucine_Degradation_and_HMG-CoA_Metabolism<br>isu;Valine_degradation<br>isu;Leucine_Biosynthesis |
| fig 6666666.28482.peg.3987 | Contig_44 | 21836 | 21099 | - | Cobalamin synthase                                                                   | FIG00006032 | icw(1);Cobalamin_synthesis<br>icw(2);Coenzyme_B12_biosynthesis                                                                                                                                                                                               |
| fig 6666666.28482.peg.3988 | Contig_44 | 22891 | 21836 | - | Nicotinate-nucleotide--dimethylbenzimidazole phosphoribosyltransferase (EC 2.4.2.21) | FIG00000824 | icw(2);Cobalamin_synthesis<br>icw(3);Coenzyme_B12_biosynthesis                                                                                                                                                                                               |
| fig 6666666.28482.peg.3989 | Contig_44 | 23427 | 22891 | - | Adenosylcobinamide-phosphate guanylyltransferase (EC 2.7.7.62)                       | FIG00000764 | isu;Cobalamin_synthesis<br>icw(1);Coenzyme_B12_biosynthesis                                                                                                                                                                                                  |
| fig 6666666.28482.peg.3990 | Contig_44 | 24114 | 23455 | - | CblZ, a non-orthologous displasment for Alpha-ribazole-5'-phosphate phosphatase      | FIG00006903 | isu;Coenzyme_B12_biosynthesis                                                                                                                                                                                                                                |

|                            |           |       |       |   |                                                              |             |                                                                                                                                                                                                                                                                                                                                                     |
|----------------------------|-----------|-------|-------|---|--------------------------------------------------------------|-------------|-----------------------------------------------------------------------------------------------------------------------------------------------------------------------------------------------------------------------------------------------------------------------------------------------------------------------------------------------------|
| fig 6666666.28482.peg.3991 | Contig_44 | 24241 | 25392 | + | Glycerate kinase (EC 2.7.1.31)                               | FIG00000456 | idu(1);Glycerate_metabolism<br>idu(1);Serine-glyoxylate_cycle<br>idu(1);Allantoin_Utilization<br>idu(1);Glycerolipid_and_Glycerophospholipid_Metabolism_in_Bacteria<br>idu(1);Photorespiration_(oxidative_C2_cycle) idu(1);D-galactarate,_D-glucarate_and_D-glycerate_catabolism idu(1);D-galactarate,_D-glucarate_and_D-glycerate_catabolism_-_gjo |
| fig 6666666.28482.peg.3992 | Contig_44 | 25475 | 25831 | + | probable iron binding protein from the HesB_IscA_SufA family | FIG00000502 | isu;Iron-sulfur_cluster_assembly                                                                                                                                                                                                                                                                                                                    |
| fig 6666666.28482.peg.3993 | Contig_44 | 26315 | 25845 | - | Possible membrane protein                                    | FIG01121868 | ff                                                                                                                                                                                                                                                                                                                                                  |
| fig 6666666.28482.peg.3994 | Contig_44 | 26651 | 27625 | + | Adenosine kinase (EC 2.7.1.20)                               | FIG00020335 | isu;Purine_conversions                                                                                                                                                                                                                                                                                                                              |
| fig 6666666.28482.peg.3995 | Contig_44 | 29696 | 27726 | - | Asparagine synthetase [glutamine-hydrolyzing] (EC 6.3.5.4)   | FIG00035175 | idu(1);Glutamine,_Glutamate,_Aspartate_and_Asparagine_Biosynthesis<br>idu(1);Glutamate_and_Aspartate_uptake_in_Bacteria<br>idu(1);Cyanophycin_Metabolism                                                                                                                                                                                            |
| fig 6666666.28482.peg.3996 | Contig_44 | 29826 | 30899 | + | Cytochrome c oxidase polypeptide II (EC 1.9.3.1)             | FIG00041887 | isu;Terminal_cytochrome_C_oxidases<br>isu;CBSS-316057.3.peg.563                                                                                                                                                                                                                                                                                     |
| fig 6666666.28482.peg.3997 | Contig_44 | 30908 | 31327 | + | Probable cytochrome c oxidase polypeptide 4 (EC 1.9.3.1)     | FIG00484860 | ff                                                                                                                                                                                                                                                                                                                                                  |

|                            |           |       |       |   |                                                                                  |             |                                                                                                               |
|----------------------------|-----------|-------|-------|---|----------------------------------------------------------------------------------|-------------|---------------------------------------------------------------------------------------------------------------|
| fig 6666666.28482.peg.3998 | Contig_44 | 31510 | 32469 | + | Putative membrane protein MmpS3                                                  | FIG01258930 | ff                                                                                                            |
| fig 6666666.28482.peg.3999 | Contig_45 | 1631  | 192   | - | hypothetical protein                                                             | FIG00638284 | ff                                                                                                            |
| fig 6666666.28482.peg.4000 | Contig_45 | 2730  | 3104  | + | FIG00820548:<br>hypothetical protein                                             | FIG00820545 | ff                                                                                                            |
| fig 6666666.28482.peg.4001 | Contig_45 | 3376  | 4749  | + | serine protease                                                                  | FIG01109635 | ff                                                                                                            |
| fig 6666666.28482.peg.4002 | Contig_45 | 4757  | 5158  | + | Twin-arginine translocation protein TatB                                         | FIG00000670 | isu;Twin-arginine_translocation_system                                                                        |
| fig 6666666.28482.peg.4003 | Contig_45 | 6375  | 5239  | - | Mrp protein homolog                                                              | FIG00448421 | ff                                                                                                            |
| fig 6666666.28482.peg.4004 | Contig_45 | 7477  | 6407  | - | POSSIBLE MEMBRANE PROTEIN                                                        | FIG00692835 | ff                                                                                                            |
| fig 6666666.28482.peg.4005 | Contig_45 | 7487  | 7774  | + | hypothetical protein                                                             |             |                                                                                                               |
| fig 6666666.28482.peg.4006 | Contig_45 | 8300  | 7758  | - | PROBABLE MEMBRANE PROTEIN                                                        | FIG00816212 | ff                                                                                                            |
| fig 6666666.28482.peg.4007 | Contig_45 | 9610  | 8297  | - | Mg/Co/Ni transporter MgtE / CBS domain                                           | FIG00437800 | idu(1);Magnesium_transport                                                                                    |
| fig 6666666.28482.peg.4008 | Contig_45 | 10221 | 9676  | - | Basic proline-rich protein                                                       | FIG00822000 | ff                                                                                                            |
| fig 6666666.28482.peg.4009 | Contig_45 | 10288 | 10815 | + | FIG00945083:<br>hypothetical protein                                             | FIG00945082 | ff                                                                                                            |
| fig 6666666.28482.peg.4010 | Contig_45 | 10815 | 12194 | + | Maltose/maltodextrin ABC transporter, substrate binding periplasmic protein MalE | FIG00002265 | icw(1);Maltose_and_Maltodextrin_Utilization isu;Alpha-Amylase_locus_in_Streptococcus isu;Bacterial_Chemotaxis |
| fig 6666666.28482.peg.4011 | Contig_45 | 12191 | 13063 | + | Maltose/maltodextrin ABC transporter, permease protein MalF                      | FIG00019868 | isu;Maltose_and_Maltodextrin_Utilization                                                                      |
| fig 6666666.28482.peg.4012 | Contig_45 | 13092 | 13886 | + | Inositol transport system permease protein                                       | FIG00008562 | ff                                                                                                            |

|                            |           |       |       |   |                                                                               |             |                                                                       |
|----------------------------|-----------|-------|-------|---|-------------------------------------------------------------------------------|-------------|-----------------------------------------------------------------------|
| fig 6666666.28482.peg.4013 | Contig_45 | 13891 | 15063 | + | Glycerol-3-phosphate ABC transporter, ATP-binding protein UgpC (TC 3.A.1.1.3) | FIG00027233 | idu(1);Glycerol_and_Glycerol-3-phosphate_Uptake_and_Utilization       |
| fig 6666666.28482.peg.4014 | Contig_45 | 15060 | 15644 | + | FIG00820926: hypothetical protein                                             | FIG00820925 | ff                                                                    |
| fig 6666666.28482.peg.4015 | Contig_45 | 16849 | 15746 | - | Magnesium and cobalt transport protein CorA                                   | FIG00004180 | isu;Magnesium_transport<br>isu;Campylobacter_Iron_Metabolism          |
| fig 6666666.28482.peg.4016 | Contig_45 | 17018 | 18007 | + | Malate dehydrogenase (EC 1.1.1.37)                                            | FIG00000455 | isu;Serine-glyoxylate_cycle<br>isu;TCA_Cycle<br>isu;Glyoxylate_bypass |
| fig 6666666.28482.peg.4017 | Contig_45 | 18033 | 19229 | + | NADP-dependent malic enzyme (EC 1.1.1.40)                                     | FIG00000777 | isu;Pyruvate_metabolism_I:_anaplerotic_reactions,_PEP                 |
| fig 6666666.28482.peg.4018 | Contig_45 | 19226 | 20077 | + | Substrate-binding region of ABC-type glycine betaine transport system         | FIG00862992 | ff                                                                    |
| fig 6666666.28482.peg.4019 | Contig_45 | 20935 | 20108 | - | Short-chain type dehydrogenase/reductase                                      | FIG01343100 | ff                                                                    |
| fig 6666666.28482.peg.4020 | Contig_46 | 966   | 484   | - | integral membrane protein                                                     |             |                                                                       |
| fig 6666666.28482.peg.4021 | Contig_46 | 1535  | 966   | - | FIG00827194: hypothetical protein                                             | FIG00827190 | ff                                                                    |
| fig 6666666.28482.peg.4022 | Contig_46 | 1585  | 2973  | + | DNA polymerase IV (EC 2.7.7.7)                                                | FIG00023943 | idu(1);DNA_repair,_bacterial                                          |
| fig 6666666.28482.peg.4023 | Contig_46 | 3879  | 2938  | - | L-asparaginase (EC 3.5.1.1)                                                   | FIG00000376 | isu;Glutamine,_Glutamate,_Aspartate_and_Asparagine_Biosynthesis       |

|                            |           |       |       |   |                                                                      |             |                                                                                                                                                       |
|----------------------------|-----------|-------|-------|---|----------------------------------------------------------------------|-------------|-------------------------------------------------------------------------------------------------------------------------------------------------------|
| fig 6666666.28482.peg.4024 | Contig_46 | 3881  | 4513  | + | Lipoprotein signal<br>peptidase (EC 3.4.23.36)                       | FIG00000081 | isu;Signal_peptidase<br>isu;Sex_pheromones_in_Enterococcus_faecalis_and_other_Firmicutes<br>isu;CBSS-36873.1.peg.4752<br>isu;Lipoprotein_Biosynthesis |
| fig 6666666.28482.peg.4025 | Contig_46 | 4513  | 5439  | + | Ribosomal large subunit<br>pseudouridine synthase<br>D (EC 4.2.1.70) | FIG00000124 | isu;RNA_pseudouridine_syntheses                                                                                                                       |
| fig 6666666.28482.peg.4026 | Contig_46 | 6278  | 5520  | - | FIG00825360:<br>hypothetical protein                                 | FIG00825359 | ff                                                                                                                                                    |
| fig 6666666.28482.peg.4027 | Contig_46 | 6728  | 6330  | - | Cyanoglobin; Hemoglobin-like protein HbN                             | FIG00002685 | isu;Bacterial_hemoglobins                                                                                                                             |
| fig 6666666.28482.peg.4028 | Contig_46 | 6957  | 7976  | + | "Oxidoreductase, short-chain<br>dehydrogenase/reductase family"      | FIG01320732 | ff                                                                                                                                                    |
| fig 6666666.28482.peg.4029 | Contig_46 | 7945  | 8784  | + | Ketoacyl reductase                                                   | FIG01339396 | ff                                                                                                                                                    |
| fig 6666666.28482.peg.4030 | Contig_46 | 12188 | 9252  | - | Putative membrane<br>protein                                         | FIG01056920 | ff                                                                                                                                                    |
| fig 6666666.28482.peg.4031 | Contig_46 | 12631 | 12185 | - | membrane protein, MmpS family                                        | FIG01309473 | ff                                                                                                                                                    |
| fig 6666666.28482.peg.4032 | Contig_46 | 13358 | 12750 | - | Transcriptional regulator, TetR family                               | FIG00554417 | ff                                                                                                                                                    |
| fig 6666666.28482.peg.4033 | Contig_46 | 13459 | 17004 | + | DNA polymerase III alpha<br>subunit (EC 2.7.7.7)                     | FIG00041038 | idu(1);DNA-replication idu(1);CBSS-350688.3.peg.1509                                                                                                  |
| fig 6666666.28482.peg.4034 | Contig_46 | 17302 | 20364 | + | Adenylate cyclase (EC 4.6.1.1)                                       | FIG00001294 | idu(25);cAMP_signaling_in_bacteria                                                                                                                    |
| fig 6666666.28482.peg.4035 | Contig_46 | 21341 | 20394 | - | putative hydrolase                                                   |             |                                                                                                                                                       |

|                            |           |       |       |   |                                                                                                 |             |                                                                                                                                                            |
|----------------------------|-----------|-------|-------|---|-------------------------------------------------------------------------------------------------|-------------|------------------------------------------------------------------------------------------------------------------------------------------------------------|
| fig 6666666.28482.peg.4036 | Contig_46 | 21784 | 21338 | - | FIG00827074:<br>hypothetical protein                                                            | FIG00827072 | ff                                                                                                                                                         |
| fig 6666666.28482.peg.4037 | Contig_46 | 21844 | 22245 | + | Transcriptional regulator,<br>MerR family                                                       | FIG00003460 | idu(1);Cobalt-zinc-<br>cadmium_resistance                                                                                                                  |
| fig 6666666.28482.peg.4038 | Contig_46 | 22262 | 22741 | + | Glyoxalase/bleomycin<br>resistance<br>protein/dioxygenase                                       | FIG00830431 | ff                                                                                                                                                         |
| fig 6666666.28482.peg.4039 | Contig_46 | 22815 | 24641 | + | Long-chain-fatty-acid--<br>CoA ligase (EC 6.2.1.3)                                              | FIG00018699 | idu(72);n-<br>Phenylalkanoic_acid_degradation<br>idu(72);Fatty_acid_metabolism_clust<br>er idu(72);Biotin_synthesis_cluster<br>idu(72);Biotin_biosynthesis |
| fig 6666666.28482.peg.4040 | Contig_46 | 24686 | 26545 | + | Glycerol-3-phosphate<br>acyltransferase (EC<br>2.3.1.15)                                        | FIG00001327 | idu(1);Glycerolipid_and_Glycerophos<br>pholipid_Metabolism_in_Bacteria                                                                                     |
| fig 6666666.28482.peg.4041 | Contig_46 | 28036 | 26597 | - | 2-polyprenyl-6-<br>methoxyphenol<br>hydroxylase and related<br>FAD-dependent<br>oxidoreductases | FIG00453279 | ff                                                                                                                                                         |
| fig 6666666.28482.peg.4042 | Contig_46 | 28440 | 28033 | - | FIG235764: hypothetical<br>protein                                                              | FIG01578613 | ff                                                                                                                                                         |
| fig 6666666.28482.peg.4043 | Contig_46 | 28534 | 29091 | + | Transcriptional regulator,<br>TetR family                                                       | FIG00628138 | ff                                                                                                                                                         |
| fig 6666666.28482.peg.4044 | Contig_46 | 29119 | 29556 | + | AclJ                                                                                            | FIG00862767 | ff                                                                                                                                                         |
| fig 6666666.28482.peg.4045 | Contig_46 | 29664 | 30860 | + | Threonine dehydratase<br>(EC 4.3.1.19)                                                          | FIG00022899 | isu;Threonine_degradation<br>isu;Branched-<br>Chain_Amino_Acid_Biosynthesis                                                                                |
| fig 6666666.28482.peg.4046 | Contig_46 | 30870 | 31748 | + | FIG00828971:<br>hypothetical protein                                                            | FIG00828970 | ff                                                                                                                                                         |

|                            |           |       |       |   |                                                              |             |                                           |
|----------------------------|-----------|-------|-------|---|--------------------------------------------------------------|-------------|-------------------------------------------|
| fig 6666666.28482.peg.4047 | Contig_46 | 32390 | 31740 | - | Pyridoxamine 5'-phosphate oxidase-related, FMN-binding       | FIG01045148 | ff                                        |
| fig 6666666.28482.peg.4048 | Contig_46 | 32431 | 33744 | + | Predicted transcriptional regulator of pyridoxine metabolism | FIG00008736 | isu;Pyridoxin_(Vitamin_B6)_Biosynthesis   |
| fig 6666666.28482.peg.4049 | Contig_46 | 34327 | 33722 | - | G:T/U mismatch-specific uracil/thymine DNA-glycosylase       | FIG00001253 | isu;DNA_repair,_bacterial DNA_glycosylase |
| fig 6666666.28482.peg.4050 | Contig_46 | 34917 | 34384 | - | hypothetical protein                                         | FIG00638284 | ff                                        |
| fig 6666666.28482.peg.4051 | Contig_46 | 35489 | 34914 | - | putative secreted protein                                    |             |                                           |
| fig 6666666.28482.peg.4052 | Contig_46 | 35732 | 35577 | - | hypothetical protein                                         | FIG00638284 | ff                                        |
| fig 6666666.28482.peg.4053 | Contig_46 | 35836 | 36486 | + | putative two-component system response regulator             |             |                                           |
| fig 6666666.28482.peg.4054 | Contig_46 | 37385 | 36483 | - | O-Methyltransferase involved in polyketide biosynthesis      | FIG01313020 | ff                                        |
| fig 6666666.28482.peg.4055 | Contig_46 | 37473 | 37682 | + | FIG00821924: hypothetical protein                            | FIG00821923 | ff                                        |
| fig 6666666.28482.peg.4056 | Contig_46 | 37682 | 38086 | + | FIG00820947: hypothetical protein                            | FIG00820946 | ff                                        |
| fig 6666666.28482.peg.4057 | Contig_46 | 39826 | 38093 | - | Malto-oligosyltrehalose trehalohydrolase (EC 3.2.1.141)      | FIG00001338 | icw(2);Trehalose_Biosynthesis             |

|                            |           |       |       |   |                                                                          |             |                                                                                                 |
|----------------------------|-----------|-------|-------|---|--------------------------------------------------------------------------|-------------|-------------------------------------------------------------------------------------------------|
| fig 6666666.28482.peg.4058 | Contig_46 | 42119 | 39819 | - | Malto-oligosyltrehalose synthase (EC 5.4.99.15)                          | FIG00001606 | isu;Trehalose_Biosynthesis<br>isu;Maltose_and_Maltodextrin_Utilization                          |
| fig 6666666.28482.peg.4059 | Contig_46 | 44336 | 42123 | - | Glycogen debranching enzyme (EC 3.2.1.-)                                 | FIG00109688 | icw(1);Trehalose_Biosynthesis<br>idu(3);Glycogen_metabolism                                     |
| fig 6666666.28482.peg.4060 | Contig_46 | 46532 | 44370 | - | O-antigen acetylase                                                      | FIG01370327 | ff                                                                                              |
| fig 6666666.28482.peg.4061 | Contig_46 | 47392 | 46646 | - | NLP/P60 family protein                                                   | FIG00830690 | ff                                                                                              |
| fig 6666666.28482.peg.4062 | Contig_46 | 48246 | 47785 | - | FIG00821756:<br>hypothetical protein                                     | FIG00821754 | ff                                                                                              |
| fig 6666666.28482.peg.4063 | Contig_46 | 48304 | 49608 | + | Adenosylmethionine-8-amino-7-oxononanoate aminotransferase (EC 2.6.1.62) | FIG00012547 | isu;Biotin_biosynthesis_Experimental<br>isu;Biotin_synthesis_cluster<br>isu;Biotin_biosynthesis |
| fig 6666666.28482.peg.4064 | Contig_46 | 49707 | 50177 | + | hypothetical protein                                                     |             |                                                                                                 |
| fig 6666666.28482.peg.4065 | Contig_46 | 50535 | 51071 | + | PE-PGRS family protein                                                   |             | idu(16);PPE_gene_cluster_in_Mycobacteria                                                        |
| fig 6666666.28482.peg.4066 | Contig_46 | 54011 | 51096 | - | Putative membrane protein                                                | FIG01056920 | ff                                                                                              |
| fig 6666666.28482.peg.4067 | Contig_46 | 54012 | 54149 | + | hypothetical protein                                                     |             |                                                                                                 |
| fig 6666666.28482.peg.4068 | Contig_46 | 57023 | 54156 | - | Putative membrane protein                                                | FIG01056920 | ff                                                                                              |
| fig 6666666.28482.peg.4069 | Contig_46 | 57400 | 57020 | - | membrane protein, MmpS family                                            | FIG01309473 | ff                                                                                              |
| fig 6666666.28482.peg.4070 | Contig_46 | 59127 | 57715 | - | hypothetical protein                                                     |             |                                                                                                 |
| fig 6666666.28482.peg.4071 | Contig_46 | 60717 | 59326 | - | FIG01292463:<br>hypothetical protein                                     | FIG01292461 | ff                                                                                              |
| fig 6666666.28482.peg.4072 | Contig_46 | 61141 | 62409 | + | hypothetical glycosyl transferase( EC:2.- )                              |             |                                                                                                 |

|                            |           |       |       |   |                                                                       |             |                                                                                        |
|----------------------------|-----------|-------|-------|---|-----------------------------------------------------------------------|-------------|----------------------------------------------------------------------------------------|
| fig 6666666.28482.peg.4073 | Contig_46 | 63910 | 62444 | - | Glucose-methanol-choline (GMC) oxidoreductase:NAD binding site        | FIG00001629 | idu(3);Respiratory_dehydrogenases_1                                                    |
| fig 6666666.28482.peg.4074 | Contig_47 | 3369  | 202   | - | Adenylate cyclase (EC 4.6.1.1)                                        | FIG00001294 | idu(25);cAMP_signaling_in_bacteria                                                     |
| fig 6666666.28482.peg.4075 | Contig_47 | 3636  | 3770  | + | hypothetical protein                                                  |             |                                                                                        |
| fig 6666666.28482.peg.4076 | Contig_47 | 4251  | 3793  | - | Universal stress protein UspA and related nucleotide-binding proteins | FIG01023736 | ff                                                                                     |
| fig 6666666.28482.peg.4077 | Contig_47 | 5395  | 4358  | - | ATP-dependent DNA ligase (EC 6.5.1.1)                                 | FIG00052980 | idu(2);DNA_replication,_archaeal icw(1);DNA_Repair_Base_Excision icw(1);DNA_ligases    |
| fig 6666666.28482.peg.4078 | Contig_47 | 5422  | 6477  | + | ATP-dependent DNA ligase (EC 6.5.1.1) LigC                            | FIG00111848 | isu;DNA_Repair_Base_Excision isu;DNA_ligases isu;Nonhomologous_End-Joining_in_Bacteria |
| fig 6666666.28482.peg.4079 | Contig_47 | 6904  | 6491  | - | conserved hypothetical secreted protein                               |             |                                                                                        |
| fig 6666666.28482.peg.4080 | Contig_47 | 7400  | 7071  | - | hypothetical protein                                                  |             |                                                                                        |
| fig 6666666.28482.peg.4081 | Contig_47 | 7519  | 7971  | + | FIG00830839: hypothetical protein                                     | FIG00830838 | ff                                                                                     |
| fig 6666666.28482.peg.4082 | Contig_47 | 8012  | 8380  | + | FIG00824363: hypothetical protein                                     | FIG00824362 | ff                                                                                     |
| fig 6666666.28482.peg.4083 | Contig_47 | 10051 | 8822  | - | putative cytochrome P450 hydroxylase                                  | FIG00032437 | idu(49);Nitric_oxide_synthase                                                          |
| fig 6666666.28482.peg.4084 | Contig_47 | 10988 | 10083 | - | haloalkane dehalogenase( EC:3.8.1.5 )                                 | FIG01630420 | ff                                                                                     |
| fig 6666666.28482.peg.4085 | Contig_47 | 11475 | 10990 | - | MutT-like protein                                                     | FIG01324438 | ff                                                                                     |

|                            |           |       |       |   |                                                            |             |                               |
|----------------------------|-----------|-------|-------|---|------------------------------------------------------------|-------------|-------------------------------|
| fig 6666666.28482.peg.4086 | Contig_47 | 12837 | 11482 | - | Wax ester synthase/acyl-CoA:diacylglycerol acyltransferase | FIG01309728 | ff                            |
| fig 6666666.28482.peg.4087 | Contig_47 | 12981 | 13772 | + | Acyltransferase family protein                             | FIG00832346 | ff                            |
| fig 6666666.28482.peg.4088 | Contig_47 | 14179 | 13769 | - | hypothetical protein                                       |             |                               |
| fig 6666666.28482.peg.4089 | Contig_47 | 16706 | 15234 | - | monooxygenase, flavin-binding family                       | FIG01386881 | ff                            |
| fig 6666666.28482.peg.4090 | Contig_47 | 16805 | 16954 | + | hypothetical protein                                       |             |                               |
| fig 6666666.28482.peg.4091 | Contig_47 | 18193 | 17336 | - | FIG00822389: hypothetical protein                          | FIG00822386 | ff                            |
| fig 6666666.28482.peg.4092 | Contig_47 | 18287 | 19357 | + | FIG00827644: hypothetical protein                          | FIG00827643 | ff                            |
| fig 6666666.28482.peg.4093 | Contig_47 | 19354 | 19848 | + | Possible lactoylglutathione lyase                          | FIG01331051 | ff                            |
| fig 6666666.28482.peg.4094 | Contig_47 | 19845 | 20618 | + | FIG00822257: hypothetical protein                          | FIG00822256 | ff                            |
| fig 6666666.28482.peg.4095 | Contig_47 | 20615 | 21220 | + | Transcriptional regulator, TetR family                     | FIG00554417 | ff                            |
| fig 6666666.28482.peg.4096 | Contig_47 | 21217 | 22326 | + | hypothetical protein                                       |             |                               |
| fig 6666666.28482.peg.4097 | Contig_47 | 23858 | 22329 | - | FIG00825594: hypothetical protein                          | FIG00825593 | ff                            |
| fig 6666666.28482.peg.4098 | Contig_48 | 373   | 1410  | + | FIG00821239: hypothetical protein                          | FIG00821236 | ff                            |
| fig 6666666.28482.peg.4099 | Contig_48 | 1703  | 1407  | - | FIG00995606: hypothetical protein                          | FIG00823054 | ff                            |
| fig 6666666.28482.peg.4100 | Contig_48 | 2025  | 1735  | - | FIG00999563: hypothetical protein                          | FIG00822585 | ff                            |
| fig 6666666.28482.peg.4101 | Contig_48 | 2261  | 2061  | - | FIG043778: hypothetical protein                            | FIG00043778 | icw(5);CBSS-336982.3.peg.3874 |

|                            |           |       |       |   |                                                                 |             |                                                                                                                                       |
|----------------------------|-----------|-------|-------|---|-----------------------------------------------------------------|-------------|---------------------------------------------------------------------------------------------------------------------------------------|
| fig 6666666.28482.peg.4102 | Contig_48 | 2858  | 2280  | - | FIG054221: Possible conserved alanine rich membrane protein     |             | isu;CBSS-336982.3.peg.3874                                                                                                            |
| fig 6666666.28482.peg.4103 | Contig_48 | 3652  | 2855  | - | FIG016317: Probable conserved transmembrane protein             | FIG00016317 | icw(1);CBSS-336982.3.peg.3874                                                                                                         |
| fig 6666666.28482.peg.4104 | Contig_48 | 4812  | 3649  | - | Flp pilus assembly protein, ATPase CpaF                         | FIG00014856 | icw(3);CBSS-336982.3.peg.3874                                                                                                         |
| fig 6666666.28482.peg.4105 | Contig_48 | 5900  | 4809  | - | Septum site-determining protein MinD @ possible CpaE            | FIG00029816 | isu;Septum_site-determining_cluster_Min<br>isu;Bacterial_Cell_Division<br>icw(4);CBSS-336982.3.peg.3874<br>isu;Bacterial_Cytoskeleton |
| fig 6666666.28482.peg.4106 | Contig_48 | 6341  | 7198  | + | Phosphoserine phosphatase (EC 3.1.3.3)                          | FIG00000149 | icw(2);CBSS-336982.3.peg.3874<br>idu(3);Serine_Biosynthesis                                                                           |
| fig 6666666.28482.peg.4107 | Contig_48 | 8386  | 7628  | - | probable oxidoreductase                                         | FIG01124638 | ff                                                                                                                                    |
| fig 6666666.28482.peg.4108 | Contig_48 | 9999  | 8398  | - | Dipeptide transport ATP-binding protein DppD (TC 3.A.1.5.2)     | FIG00014907 | icw(1);ABC_transporter_dipeptide_(TC_3.A.1.5.2)                                                                                       |
| fig 6666666.28482.peg.4109 | Contig_48 | 10859 | 9996  | - | Dipeptide transport system permease protein DppC (TC 3.A.1.5.2) | FIG00006691 | icw(2);ABC_transporter_dipeptide_(TC_3.A.1.5.2)                                                                                       |
| fig 6666666.28482.peg.4110 | Contig_48 | 11778 | 10852 | - | Dipeptide transport system permease protein DppB (TC 3.A.1.5.2) | FIG01954097 | isu;ABC_transporter_dipeptide_(TC_3.A.1.5.2)                                                                                          |

|                            |           |       |       |   |                                                                                           |             |                                                                                                             |
|----------------------------|-----------|-------|-------|---|-------------------------------------------------------------------------------------------|-------------|-------------------------------------------------------------------------------------------------------------|
| fig 6666666.28482.peg.4111 | Contig_48 | 13387 | 11780 | - | Dipeptide-binding ABC transporter, periplasmic substrate-binding component (TC 3.A.1.5.2) | FIG00006128 | icw(3);ABC_transporter_dipeptide_(TC_3.A.1.5.2) isu;Bacterial_Chemotaxis                                    |
| fig 6666666.28482.peg.4112 | Contig_48 | 13494 | 14183 | + | hypothetical protein                                                                      |             |                                                                                                             |
| fig 6666666.28482.peg.4113 | Contig_48 | 14726 | 14190 | - | FIG00825127: hypothetical protein                                                         | FIG00825126 | ff                                                                                                          |
| fig 6666666.28482.peg.4114 | Contig_48 | 14841 | 16790 | + | Acetyl-coenzyme A synthetase (EC 6.2.1.1)                                                 | FIG00022631 | idu(2);Pyruvate_metabolism_II:_acetyl-CoA,_acetogenesis_from_pyruvate idu(2);Ketoisovalerate_oxidoreductase |
| fig 6666666.28482.peg.4115 | Contig_48 | 17533 | 16886 | - | Protease                                                                                  | FIG01317673 | ff                                                                                                          |
| fig 6666666.28482.peg.4116 | Contig_48 | 17805 | 17524 | - | hypothetical protein                                                                      |             |                                                                                                             |
| fig 6666666.28482.peg.4117 | Contig_48 | 17851 | 18381 | + | FIG00820727: hypothetical protein                                                         | FIG01123008 | ff                                                                                                          |
| fig 6666666.28482.peg.4118 | Contig_48 | 18382 | 19359 | + | Epoxide hydrolase (EC 3.3.2.9)                                                            | FIG00009455 | idu(3);CBSS-410289.13.peg.3174                                                                              |
| fig 6666666.28482.peg.4119 | Contig_48 | 20560 | 19352 | - | putative serine protease                                                                  | FIG00814692 | ff                                                                                                          |
| fig 6666666.28482.peg.4120 | Contig_48 | 21333 | 20557 | - | Hypothetical nudix hydrolase YeaB                                                         | FIG00136447 | idu(1);Nudix_proteins_(nucleoside_triphosphate_hydrolases)                                                  |
| fig 6666666.28482.peg.4121 | Contig_48 | 22001 | 21363 | - | Possible membrane-anchored thioredoxin-like protein                                       | FIG00544296 | ff                                                                                                          |
| fig 6666666.28482.peg.4122 | Contig_48 | 22726 | 22019 | - | Endonuclease III (EC 4.2.99.18)                                                           | FIG00000290 | isu;DNA_Repair_Base_Excision isu;Control_of_cell_elongation_-_division_cycle_in_Bacilli                     |
| fig 6666666.28482.peg.4123 | Contig_48 | 22861 | 23256 | + | POSSIBLE MEMBRANE PROTEIN                                                                 | FIG00692835 | ff                                                                                                          |

|                            |           |       |       |   |                                                                                                            |             |                                                                    |
|----------------------------|-----------|-------|-------|---|------------------------------------------------------------------------------------------------------------|-------------|--------------------------------------------------------------------|
| fig 6666666.28482.peg.4124 | Contig_48 | 23353 | 24027 | + | cAMP-binding proteins - catabolite gene activator and regulatory subunit of cAMP-dependent protein kinases | FIG00003090 | idu(1);cAMP_signaling_in_bacteria<br>idu(1);CBSS-479431.5.peg.3955 |
| fig 6666666.28482.peg.4125 | Contig_48 | 24892 | 24098 | - | FIG146518: Zn-dependent hydrolases, including glyoxylases                                                  | FIG00013561 | icw(2);CBSS-479431.5.peg.3955                                      |
| fig 6666666.28482.peg.4126 | Contig_48 | 25353 | 24898 | - | FIG137598: hypothetical protein                                                                            | FIG00148911 | icw(1);CBSS-479431.5.peg.3955                                      |
| fig 6666666.28482.peg.4127 | Contig_48 | 25517 | 25356 | - | FIG011121: hypothetical protein                                                                            | FIG00011121 | icw(3);CBSS-479431.5.peg.3955                                      |
| fig 6666666.28482.peg.4128 | Contig_48 | 25595 | 26617 | + | Arsenical pump-driving ATPase (EC 3.6.3.16)                                                                | FIG00003088 | icw(1);Stress_related_cluster<br>icw(1);Arsenic_resistance         |
| fig 6666666.28482.peg.4129 | Contig_48 | 26614 | 27768 | + | Arsenical pump-driving ATPase (EC 3.6.3.16)                                                                | FIG00003088 | icw(1);Stress_related_cluster<br>icw(1);Arsenic_resistance         |
| fig 6666666.28482.peg.4130 | Contig_48 | 28410 | 28060 | - | WhiB-type transcription regulator                                                                          | FIG00019991 | idu(2);WhiB_and_WhiB-type_regulatory_proteins_                     |
| fig 6666666.28482.peg.4131 | Contig_48 | 28829 | 31198 | + | Multimodular transpeptidase-transglycosylase (EC 2.4.1.129) (EC 3.4.-.-)                                   | FIG00000011 | idu(2);Peptidoglycan_Biosynthesis                                  |
| fig 6666666.28482.peg.4132 | Contig_48 | 31268 | 32236 | + | putative secreted protein                                                                                  | FIG00905474 | ff                                                                 |
| fig 6666666.28482.peg.4133 | Contig_48 | 32233 | 33345 | + | Cysteine synthase B (EC 2.5.1.47)                                                                          | FIG00470735 | isu;Cysteine_Biosynthesis                                          |
| fig 6666666.28482.rna.43   | Contig_48 | 33399 | 33472 | + | tRNA-Pro-CGG                                                                                               |             | isu;tRNAs                                                          |
| fig 6666666.28482.peg.4134 | Contig_48 | 33827 | 34249 | + | hypothetical protein                                                                                       |             |                                                                    |
| fig 6666666.28482.peg.4135 | Contig_48 | 34460 | 35524 | + | hypothetical protein                                                                                       |             |                                                                    |

|                            |           |       |       |   |                                                                                          |             |                                                                                                           |
|----------------------------|-----------|-------|-------|---|------------------------------------------------------------------------------------------|-------------|-----------------------------------------------------------------------------------------------------------|
| fig 6666666.28482.peg.4136 | Contig_48 | 36154 | 35564 | - | FIG00820655:<br>hypothetical protein                                                     | FIG00820654 | ff                                                                                                        |
| fig 6666666.28482.peg.4137 | Contig_48 | 36875 | 36231 | - | hypothetical protein                                                                     | FIG00638284 | ff                                                                                                        |
| fig 6666666.28482.peg.4138 | Contig_48 | 38441 | 37092 | - | Probable cytochrome<br>P450 137 cyp137 (EC<br>1.14.-.-)                                  | FIG01307566 | ff                                                                                                        |
| fig 6666666.28482.peg.4139 | Contig_48 | 38792 | 38496 | - | FIG00822896:<br>hypothetical protein                                                     | FIG00822895 | ff                                                                                                        |
| fig 6666666.28482.peg.4140 | Contig_48 | 39144 | 38947 | - | hypothetical protein                                                                     |             |                                                                                                           |
| fig 6666666.28482.peg.4141 | Contig_48 | 39529 | 39284 | - | hypothetical protein                                                                     |             |                                                                                                           |
| fig 6666666.28482.peg.4142 | Contig_48 | 39738 | 40439 | + | FIG00825085:<br>hypothetical protein                                                     | FIG00825084 | ff                                                                                                        |
| fig 6666666.28482.peg.4143 | Contig_48 | 40913 | 40407 | - | FIG00829970:<br>hypothetical protein                                                     | FIG00829968 | ff                                                                                                        |
| fig 6666666.28482.peg.4144 | Contig_48 | 40893 | 41579 | + | FIG00820289:<br>hypothetical protein                                                     | FIG00820286 | ff                                                                                                        |
| fig 6666666.28482.peg.4145 | Contig_48 | 41580 | 42896 | + | Peroxidase (EC 1.11.1.7)                                                                 | FIG00067081 | idu(1);Oxidative_stress<br>idu(1);Protection_from_Reactive_Ox<br>ygen_Species<br>idu(1);Auxin_degradation |
| fig 6666666.28482.peg.4146 | Contig_48 | 42893 | 43897 | + | FIG00829308:<br>hypothetical protein                                                     | FIG00829307 | ff                                                                                                        |
| fig 6666666.28482.peg.4147 | Contig_48 | 44227 | 43913 | - | Anti-sigma F factor<br>antagonist (spolIIA-2);<br>Anti-sigma B factor<br>antagonist RsbV | FIG00722824 | icw(4);SigmaB_stress_responce_regul<br>ation icw(5);Sigma-<br>B_stress_response_cluster_1                 |
| fig 6666666.28482.peg.4148 | Contig_48 | 44438 | 45331 | + | RsbR, positive regulator<br>of sigma-B                                                   | FIG00001285 | icw(3);SigmaB_stress_responce_regul<br>ation icw(4);Sigma-<br>B_stress_response_cluster_1                 |
| fig 6666666.28482.peg.4149 | Contig_48 | 45354 | 45743 | + | RsbS, negative regulator<br>of sigma-B                                                   | FIG00002556 | isu;SigmaB_stress_responce_regulati<br>on icw(1);Sigma-<br>B_stress_response_cluster_1                    |

|                            |           |       |       |   |                                                                 |             |                                                                                   |
|----------------------------|-----------|-------|-------|---|-----------------------------------------------------------------|-------------|-----------------------------------------------------------------------------------|
| fig 6666666.28482.peg.4150 | Contig_48 | 45733 | 46143 | + | Anti-sigma B factor RsbT                                        |             | icw(1);SigmaB_stress_responce_regulation isu;Sigma-B_stress_response_cluster_1    |
| fig 6666666.28482.peg.4151 | Contig_48 | 46190 | 46762 | + | Phosphoserine phosphatase RsbX (EC 3.1.3.3)                     | FIG01305469 | icw(2);Sigma-B_stress_response_cluster_1                                          |
| fig 6666666.28482.peg.4152 | Contig_48 | 46759 | 48975 | + | Serine phosphatase RsbU, regulator of sigma subunit             | FIG00017431 | icw(2);SigmaB_stress_responce_regulation icw(3);Sigma-B_stress_response_cluster_1 |
| fig 6666666.28482.peg.4153 | Contig_48 | 49019 | 50038 | + | FIG00825121: hypothetical protein                               | FIG00825120 | ff                                                                                |
| fig 6666666.28482.peg.4154 | Contig_48 | 50196 | 50035 | - | hypothetical protein                                            |             |                                                                                   |
| fig 6666666.28482.peg.4155 | Contig_48 | 50876 | 50232 | - | putative methyltransferase                                      | FIG01125506 | ff                                                                                |
| fig 6666666.28482.peg.4156 | Contig_48 | 51575 | 51021 | - | ThiJ/Pfpl family protein                                        | FIG00015923 | idu(8);CBSS-176280.1.peg.1561                                                     |
| fig 6666666.28482.peg.4157 | Contig_48 | 52758 | 51589 | - | Threonine dehydrogenase and related Zn-dependent dehydrogenases | FIG00053044 | idu(2);Threonine_degradation                                                      |
| fig 6666666.28482.peg.4158 | Contig_48 | 53699 | 52755 | - | hypothetical protein                                            | FIG00638284 | ff                                                                                |
| fig 6666666.28482.peg.4159 | Contig_48 | 54864 | 53878 | - | F420-dependent glucose-6-phosphate dehydrogenase                | FIG01001620 | ff                                                                                |
| fig 6666666.28482.peg.4160 | Contig_48 | 56076 | 54991 | - | Formate dehydrogenase O putative subunit                        | FIG00069510 | isu;Formate_hydrogenase                                                           |
| fig 6666666.28482.peg.4161 | Contig_48 | 57035 | 56073 | - | Formate dehydrogenase O beta subunit (EC 1.2.1.2)               | FIG00001405 | icw(1);Formate_hydrogenase                                                        |

|                            |           |       |       |   |                                                                                          |             |                                                                                                                               |
|----------------------------|-----------|-------|-------|---|------------------------------------------------------------------------------------------|-------------|-------------------------------------------------------------------------------------------------------------------------------|
| fig 6666666.28482.peg.4163 | Contig_48 | 60309 | 57010 | - | Formate dehydrogenase<br>O alpha subunit (EC<br>1.2.1.2) @ selenocysteine-<br>containing |             | icw(4);Formate_hydrogenase                                                                                                    |
| fig 6666666.28482.peg.4162 | Contig_48 | 59676 | 57010 | - | Formate dehydrogenase<br>O alpha subunit (EC<br>1.2.1.2) @ selenocysteine-<br>containing | FIG00002195 | icw(1);Selenocysteine_metabolism<br>icw(4);Formate_hydrogenase<br>icw(1);Hypothetical_protein_HNE_24<br>85                    |
| fig 6666666.28482.peg.4164 | Contig_48 | 60327 | 59746 | - | Formate dehydrogenase<br>O alpha subunit (EC<br>1.2.1.2) @ selenocysteine-<br>containing | FIG00002195 | icw(1);Selenocysteine_metabolism<br>icw(4);Formate_hydrogenase<br>icw(1);Hypothetical_protein_HNE_24<br>85                    |
| fig 6666666.28482.rna.44   | Contig_48 | 61388 | 61478 | + | tRNA-SeC(p)-TCA                                                                          |             |                                                                                                                               |
| fig 6666666.28482.peg.4166 | Contig_49 | 44    | 1228  | + | Glutaryl-CoA<br>dehydrogenase (EC<br>1.3.99.7)                                           | FIG01332484 | ff                                                                                                                            |
| fig 6666666.28482.peg.4167 | Contig_49 | 1242  | 1856  | + | Possible membrane<br>protein                                                             | FIG01121868 | ff                                                                                                                            |
| fig 6666666.28482.peg.4168 | Contig_49 | 2401  | 3792  | + | NADH dehydrogenase<br>(EC 1.6.99.3)                                                      | FIG00008708 | idu(6);Respiratory_dehydrogenases_<br>1<br>idu(6);PPE_gene_cluster_in_Mycobac<br>teria<br>idu(6);Riboflavin_synthesis_cluster |
| fig 6666666.28482.peg.4169 | Contig_49 | 5009  | 3789  | - | O-acetylhomoserine<br>sulfhydrylase (EC<br>2.5.1.49)                                     | FIG00963163 | ff                                                                                                                            |

|                            |           |       |       |   |                                                                   |             |                                                                                                 |
|----------------------------|-----------|-------|-------|---|-------------------------------------------------------------------|-------------|-------------------------------------------------------------------------------------------------|
| fig 6666666.28482.peg.4170 | Contig_49 | 5422  | 5006  | - | Rhodanese-related<br>sulfurtransferase                            | FIG01304277 | ff                                                                                              |
| fig 6666666.28482.peg.4171 | Contig_49 | 6639  | 5419  | - | Phosphoribosylglycinami<br>de formyltransferase 2<br>(EC 2.1.2.-) | FIG00000909 | isu;De_Novo_Purine_Biosynthesis                                                                 |
| fig 6666666.28482.peg.4172 | Contig_49 | 7375  | 6737  | - | FIG00822066:<br>hypothetical protein                              | FIG00822064 | ff                                                                                              |
| fig 6666666.28482.peg.4173 | Contig_49 | 8670  | 7372  | - | Adenylosuccinate<br>synthetase (EC 6.3.4.4)                       | FIG00000107 | isu;Purine_conversions                                                                          |
| fig 6666666.28482.peg.4174 | Contig_49 | 8674  | 8826  | + | hypothetical protein                                              |             |                                                                                                 |
| fig 6666666.28482.peg.4175 | Contig_49 | 8787  | 9389  | + | FIG00820475:<br>hypothetical protein                              | FIG00820474 | ff                                                                                              |
| fig 6666666.28482.peg.4176 | Contig_49 | 10309 | 9386  | - | hypothetical protein                                              | FIG00638284 | ff                                                                                              |
| fig 6666666.28482.peg.4177 | Contig_49 | 10569 | 10949 | + | hypothetical protein                                              |             |                                                                                                 |
| fig 6666666.28482.peg.4178 | Contig_49 | 10960 | 11736 | + | Possible membrane<br>protein                                      | FIG01121868 | ff                                                                                              |
| fig 6666666.28482.peg.4179 | Contig_49 | 11777 | 12676 | + | Cobalt-zinc-cadmium<br>resistance protein CzcD                    | FIG00000503 | idu(1);CBSS-36873.1.peg.4752<br>idu(1);Cobalt-zinc-<br>cadmium_resistance                       |
| fig 6666666.28482.peg.4180 | Contig_49 | 13086 | 12673 | - | FIG00820939:<br>hypothetical protein                              | FIG00820938 | ff                                                                                              |
| fig 6666666.28482.peg.4181 | Contig_49 | 13134 | 13910 | + | PROBABLE CONSERVED<br>MEMBRANE PROTEIN                            | FIG00662487 | ff                                                                                              |
| fig 6666666.28482.peg.4182 | Contig_49 | 15020 | 13986 | - | Fructose-bisphosphate<br>aldolase class II (EC<br>4.1.2.13)       | FIG00000370 | ff                                                                                              |
| fig 6666666.28482.peg.4183 | Contig_49 | 15079 | 15786 | + | DedA protein                                                      | FIG00002761 | idu(1);Uptake_of_selenate_and_sele<br>nite<br>idu(1);DedA_family_of_inner_membr<br>ane_proteins |

|                            |           |       |       |   |                                                            |             |                                                                                                                  |
|----------------------------|-----------|-------|-------|---|------------------------------------------------------------|-------------|------------------------------------------------------------------------------------------------------------------|
| fig 6666666.28482.peg.4184 | Contig_49 | 17697 | 15745 | - | Acetoacetyl-CoA synthetase (EC 6.2.1.16)                   | FIG00139370 | idu(1);Polyhydroxybutyrate_metabolism idu(1);HMG_CoA_Synthesis idu(1);Leucine_Degradation_and_HMG-CoA_Metabolism |
| fig 6666666.28482.peg.4185 | Contig_49 | 18824 | 17694 | - | fructose-bisphosphate aldolase family protein              | FIG00861911 | ff                                                                                                               |
| fig 6666666.28482.peg.4186 | Contig_49 | 18871 | 19344 | + | Isoquinoline 1-oxidoreductase alpha subunit (EC 1.3.99.16) | FIG00000941 | icw(1);N-heterocyclic_aromatic_compound_degradation icw(1);CBSS-314267.3.peg.390                                 |
| fig 6666666.28482.peg.4187 | Contig_49 | 19337 | 21454 | + | Isoquinoline 1-oxidoreductase beta subunit (EC 1.3.99.16)  | FIG00000940 | isu;N-heterocyclic_aromatic_compound_degradation isu;CBSS-314267.3.peg.390                                       |
| fig 6666666.28482.peg.4188 | Contig_49 | 22097 | 22699 | + | PROBABLE SIGNAL PEPTIDE PROTEIN                            | FIG01373654 | ff                                                                                                               |
| fig 6666666.28482.peg.4189 | Contig_49 | 22961 | 23614 | + | Oxalate decarboxylase oxdD (EC 4.1.1.2)                    |             |                                                                                                                  |
| fig 6666666.28482.peg.4190 | Contig_49 | 23631 | 23780 | + | hypothetical protein                                       |             |                                                                                                                  |
| fig 6666666.28482.peg.4191 | Contig_49 | 23815 | 24675 | + | hypothetical protein                                       |             |                                                                                                                  |
| fig 6666666.28482.peg.4192 | Contig_49 | 24677 | 25156 | + | hypothetical protein                                       |             |                                                                                                                  |
| fig 6666666.28482.peg.4193 | Contig_49 | 25958 | 25215 | - | Hydrolase, alpha/beta fold family                          |             |                                                                                                                  |
| fig 6666666.28482.peg.4194 | Contig_49 | 26882 | 26124 | - | hypothetical protein                                       |             |                                                                                                                  |
| fig 6666666.28482.peg.4195 | Contig_5  | 671   | 18    | - | Transcriptional regulator, PadR family                     | FIG00002474 | idu(4);CBSS-1352.1.peg.856                                                                                       |
| fig 6666666.28482.peg.4196 | Contig_5  | 1090  | 668   | - | FIG00823396: hypothetical protein                          | FIG00823395 | ff                                                                                                               |
| fig 6666666.28482.peg.4197 | Contig_5  | 2262  | 1087  | - | FIG00827839: hypothetical protein                          | FIG00827830 | ff                                                                                                               |

|                            |          |       |       |   |                                                                 |             |                                                            |
|----------------------------|----------|-------|-------|---|-----------------------------------------------------------------|-------------|------------------------------------------------------------|
| fig 6666666.28482.peg.4198 | Contig_5 | 2581  | 2252  | - | FIG00823970:<br>hypothetical protein                            | FIG00823964 | ff                                                         |
| fig 6666666.28482.peg.4199 | Contig_5 | 4916  | 2583  | - | FIG00821320:<br>hypothetical protein                            | FIG00821319 | ff                                                         |
| fig 6666666.28482.peg.4200 | Contig_5 | 6272  | 4917  | - | FIG00830141:<br>hypothetical protein                            | FIG00830140 | ff                                                         |
| fig 6666666.28482.peg.4201 | Contig_5 | 6542  | 7633  | + | FIG00820829:<br>hypothetical protein                            | FIG00820828 | ff                                                         |
| fig 6666666.28482.peg.4202 | Contig_5 | 7630  | 8802  | + | FIG00821633:<br>hypothetical protein                            | FIG00821630 | ff                                                         |
| fig 6666666.28482.peg.4203 | Contig_5 | 9295  | 8888  | - | FIG00824333:<br>hypothetical protein                            | FIG00824329 | ff                                                         |
| fig 6666666.28482.peg.4204 | Contig_5 | 10506 | 9298  | - | FIG00824408:<br>hypothetical protein                            | FIG00824406 | ff                                                         |
| fig 6666666.28482.peg.4205 | Contig_5 | 12771 | 10516 | - | PROBABLE ACYL-CoA<br>DEHYDROGENASE FADE6<br>(EC 1.3.99.-)       | FIG00824752 | ff                                                         |
| fig 6666666.28482.peg.4206 | Contig_5 | 15354 | 13432 | - | Pyruvate kinase family<br>protein                               | FIG01460628 | ff                                                         |
| fig 6666666.28482.peg.4207 | Contig_5 | 15505 | 16584 | + | FIG00827021:<br>hypothetical protein                            | FIG00827019 | ff                                                         |
| fig 6666666.28482.peg.4208 | Contig_5 | 17487 | 16594 | - | Fructose-bisphosphate<br>aldolase class I (EC<br>4.1.2.13)      | FIG01262685 | idu(1);Unknown_carbohydrate_utiliz<br>ation_(cluster_Yeg_) |
| fig 6666666.28482.peg.4209 | Contig_5 | 18559 | 17561 | - | Glutamine-transport ATP-<br>binding protein ABC<br>transporter  | FIG00825489 | ff                                                         |
| fig 6666666.28482.peg.4210 | Contig_5 | 19612 | 18563 | - | Glutamine-transport<br>transmembrane protein<br>ABC transporter | FIG01409078 | ff                                                         |

|                            |          |       |       |   |                                                                                                  |             |                                                                                                                           |
|----------------------------|----------|-------|-------|---|--------------------------------------------------------------------------------------------------|-------------|---------------------------------------------------------------------------------------------------------------------------|
| fig 6666666.28482.peg.4211 | Contig_5 | 19867 | 19631 | - | Isochorismatase (EC 3.3.2.1)                                                                     | FIG00009017 | idu(3);Chorismate:_Intermediate_for_synthesis_of_Tryptophan,_PAPA_antibiotics,_PABA,_3-hydroxyanthranilate_and_more.      |
| fig 6666666.28482.peg.4212 | Contig_5 | 20466 | 19873 | - | Cytochrome B561                                                                                  | FIG01221566 | ff                                                                                                                        |
| fig 6666666.28482.peg.4213 | Contig_5 | 21593 | 20463 | - | Catalase (EC 1.11.1.6)                                                                           | FIG00000313 | idu(3);Oxidative_stress<br>idu(3);Photorespiration_(oxidative_C2_cycle)<br>idu(3);Protection_from_Reactive_Oxygen_Species |
| fig 6666666.28482.peg.4214 | Contig_5 | 22088 | 21900 | - | hypothetical protein                                                                             |             |                                                                                                                           |
| fig 6666666.28482.peg.4215 | Contig_5 | 22087 | 22383 | + | Anti-sigma F factor antagonist (spolIAA-2);<br>Anti-sigma B factor antagonist RsbV               | FIG00722824 | idu(5);SigmaB_stress_responce_regulation<br>idu(5);Sigma-B_stress_response_cluster_1                                      |
| fig 6666666.28482.peg.4216 | Contig_5 | 23473 | 22388 | - | aminoglycoside phosphotransferase                                                                | FIG00824137 | ff                                                                                                                        |
| fig 6666666.28482.peg.4217 | Contig_5 | 24609 | 23470 | - | FIG00823690:<br>hypothetical protein                                                             | FIG00823687 | ff                                                                                                                        |
| fig 6666666.28482.peg.4218 | Contig_5 | 24682 | 24858 | + | hypothetical protein                                                                             |             |                                                                                                                           |
| fig 6666666.28482.peg.4219 | Contig_5 | 24851 | 25351 | + | Transcriptional regulator, TetR family                                                           | FIG00554417 | ff                                                                                                                        |
| fig 6666666.28482.peg.4220 | Contig_5 | 25463 | 26599 | + | FIG00822253:<br>hypothetical protein                                                             | FIG00822252 | ff                                                                                                                        |
| fig 6666666.28482.peg.4221 | Contig_5 | 26697 | 28457 | + | D-aminoacylase (EC 3.5.1.81)                                                                     | FIG01332753 | ff                                                                                                                        |
| fig 6666666.28482.peg.4222 | Contig_5 | 28480 | 29826 | + | Phenylpropionate dioxygenase and related ring-hydroxylating dioxygenases, large terminal subunit | FIG01371907 | ff                                                                                                                        |
| fig 6666666.28482.peg.4223 | Contig_5 | 30036 | 30248 | + | hypothetical protein                                                                             |             |                                                                                                                           |

|                            |          |       |       |   |                                                                                                  |             |    |
|----------------------------|----------|-------|-------|---|--------------------------------------------------------------------------------------------------|-------------|----|
| fig 6666666.28482.peg.4224 | Contig_5 | 30998 | 30333 | - | Response regulator<br>containing a CheY-like<br>receiver domain and an<br>HTH DNA-binding domain | FIG01327243 | ff |
| fig 6666666.28482.peg.4225 | Contig_5 | 32203 | 30995 | - | FIG00826666:<br>hypothetical protein                                                             | FIG00826664 | ff |
| fig 6666666.28482.peg.4226 | Contig_5 | 32373 | 32714 | + | hypothetical protein                                                                             |             |    |
| fig 6666666.28482.peg.4227 | Contig_5 | 32707 | 35559 | + | FIG00830249:<br>hypothetical protein                                                             | FIG00830246 | ff |
| fig 6666666.28482.peg.4228 | Contig_5 | 36009 | 35563 | - | FIG00819980:<br>hypothetical protein                                                             | FIG00819977 | ff |
| fig 6666666.28482.peg.4229 | Contig_5 | 36501 | 36103 | - | FIG00830071:<br>hypothetical protein                                                             | FIG00830070 | ff |
| fig 6666666.28482.peg.4230 | Contig_5 | 37837 | 36506 | - | FIG00823316:<br>hypothetical protein                                                             | FIG00823312 | ff |
| fig 6666666.28482.peg.4231 | Contig_5 | 39623 | 38028 | - | putative transmembrane<br>transport protein                                                      | FIG01126523 | ff |
| fig 6666666.28482.peg.4232 | Contig_5 | 39928 | 40545 | + | transcriptional regulatory<br>protein (probably<br>TetR/AcrR-family)                             | FIG00828629 | ff |
| fig 6666666.28482.peg.4233 | Contig_5 | 40576 | 41787 | + | FadE25_2                                                                                         | FIG00826652 | ff |
| fig 6666666.28482.peg.4234 | Contig_5 | 42919 | 41798 | - | putative LuxAB-like<br>Oxygenase                                                                 | FIG00477912 | ff |
| fig 6666666.28482.peg.4235 | Contig_5 | 44319 | 42925 | - | FIG01124584:<br>hypothetical protein                                                             | FIG00863066 | ff |
| fig 6666666.28482.peg.4236 | Contig_5 | 45555 | 44347 | - | FMNH2-utilizing<br>oxygenase                                                                     | FIG01129775 | ff |

|                            |          |       |       |   |                                                                                     |             |                                                                            |
|----------------------------|----------|-------|-------|---|-------------------------------------------------------------------------------------|-------------|----------------------------------------------------------------------------|
| fig 6666666.28482.peg.4237 | Contig_5 | 47083 | 46004 | - | Alkanesulfonate monooxygenase (EC 1.14.14.5)                                        | FIG00113730 | icw(2);Alkanesulfonates_Utilization<br>icw(3);Alkanesulfonate_assimilation |
| fig 6666666.28482.peg.4238 | Contig_5 | 47201 | 48418 | + | FIG00823043:<br>hypothetical protein                                                | FIG00823042 | ff                                                                         |
| fig 6666666.28482.peg.4239 | Contig_5 | 48421 | 49368 | + | FIG00822545:<br>hypothetical protein                                                | FIG00822544 | ff                                                                         |
| fig 6666666.28482.peg.4240 | Contig_5 | 50096 | 49365 | - | Alkanesulfonates transport system permease protein                                  | FIG00138354 | icw(1);Alkanesulfonates_Utilization<br>icw(2);Alkanesulfonate_assimilation |
| fig 6666666.28482.peg.4241 | Contig_5 | 51079 | 50114 | - | Alkanesulfonates-binding protein                                                    | FIG00001221 | isu;Alkanesulfonates_Utilization<br>icw(1);Alkanesulfonate_assimilation    |
| fig 6666666.28482.peg.4242 | Contig_5 | 51888 | 51076 | - | ABC-type nitrate/sulfonate/bicarbonate transport system, ATPase component           | FIG00024999 | isu;Alkanesulfonate_assimilation                                           |
| fig 6666666.28482.peg.4243 | Contig_5 | 52249 | 51968 | - | FIG00825296:<br>hypothetical protein                                                | FIG00825295 | ff                                                                         |
| fig 6666666.28482.peg.4244 | Contig_5 | 52417 | 53634 | + | FIG00823721:<br>hypothetical protein                                                | FIG00823720 | ff                                                                         |
| fig 6666666.28482.peg.4245 | Contig_5 | 54281 | 53652 | - | hypothetical protein                                                                |             |                                                                            |
| fig 6666666.28482.peg.4246 | Contig_5 | 55478 | 54441 | - | N5,N10-methylenetetrahydromethanopterin reductase-related protein, MSMEG1563 family | FIG00823643 | ff                                                                         |
| fig 6666666.28482.peg.4247 | Contig_5 | 55921 | 55490 | - | hypothetical protein                                                                |             |                                                                            |

|                            |          |       |       |   |                                                             |             |                                                                                   |
|----------------------------|----------|-------|-------|---|-------------------------------------------------------------|-------------|-----------------------------------------------------------------------------------|
| fig 6666666.28482.peg.4248 | Contig_5 | 56041 | 56607 | + | Transcriptional regulator, PadR family                      | FIG00002474 | idu(4);CBSS-1352.1.peg.856                                                        |
| fig 6666666.28482.peg.4249 | Contig_5 | 59552 | 56604 | - | Lysine decarboxylase (EC 4.1.1.18)                          | FIG01285094 | idu(1);Lysine_degradation                                                         |
| fig 6666666.28482.peg.4250 | Contig_5 | 59859 | 60074 | + | FIG00829281: hypothetical protein                           | FIG00829279 | ff                                                                                |
| fig 6666666.28482.peg.4251 | Contig_5 | 60129 | 60380 | + | hypothetical protein                                        |             |                                                                                   |
| fig 6666666.28482.peg.4252 | Contig_5 | 60588 | 61658 | + | luciferase family protein                                   | FIG01400673 | ff                                                                                |
| fig 6666666.28482.peg.4253 | Contig_5 | 61862 | 61674 | - | hypothetical protein                                        |             |                                                                                   |
| fig 6666666.28482.peg.4254 | Contig_5 | 62662 | 61943 | - | Hypothetical nudix hydrolase YeaB                           | FIG00136447 | idu(1);Nudix_proteins_(nucleoside_triphosphate_hydrolases)                        |
| fig 6666666.28482.peg.4255 | Contig_5 | 62754 | 63329 | + | FIG00825627: hypothetical protein                           | FIG00825625 | ff                                                                                |
| fig 6666666.28482.peg.4256 | Contig_5 | 63404 | 64309 | + | FIG00822955: hypothetical protein                           | FIG00822953 | ff                                                                                |
| fig 6666666.28482.peg.4257 | Contig_5 | 64746 | 64312 | - | hypothetical protein                                        |             |                                                                                   |
| fig 6666666.28482.peg.4258 | Contig_5 | 65861 | 64977 | - | Cyclopropane-fatty-acyl-phospholipid synthase (EC 2.1.1.79) | FIG00001555 | ff                                                                                |
| fig 6666666.28482.peg.4259 | Contig_5 | 66083 | 67441 | + | FIG00824750: hypothetical protein                           | FIG00824747 | ff                                                                                |
| fig 6666666.28482.peg.4260 | Contig_5 | 67793 | 67443 | - | Serine phosphatase RsbU, regulator of sigma subunit         |             | idu(4);SigmaB_stress_responce_regulation idu(4);Sigma-B_stress_response_cluster_1 |
| fig 6666666.28482.peg.4261 | Contig_5 | 68393 | 67971 | - | FIG00821490: hypothetical protein                           | FIG01359303 | ff                                                                                |
| fig 6666666.28482.peg.4262 | Contig_5 | 69676 | 68462 | - | Ferredoxin reductase                                        | FIG00011423 | idu(1);Anaerobic_respiratory_reductases                                           |
| fig 6666666.28482.peg.4263 | Contig_5 | 69869 | 69681 | - | ferredoxin (3Fe-4S)                                         |             |                                                                                   |
| fig 6666666.28482.peg.4264 | Contig_5 | 70831 | 69866 | - | FF domain protein                                           | FIG01341765 | ff                                                                                |
| fig 6666666.28482.peg.4265 | Contig_5 | 71096 | 71953 | + | FIG00826463: hypothetical protein                           | FIG00826461 | ff                                                                                |

|                            |          |       |       |   |                                                                         |             |                                                                                                                        |
|----------------------------|----------|-------|-------|---|-------------------------------------------------------------------------|-------------|------------------------------------------------------------------------------------------------------------------------|
| fig 6666666.28482.peg.4266 | Contig_5 | 72676 | 71978 | - | COG1272: Predicted membrane protein hemolysin III homolog               | FIG01323667 | ff                                                                                                                     |
| fig 6666666.28482.peg.4267 | Contig_5 | 73879 | 72809 | - | hypothetical protein                                                    | FIG00638284 | ff                                                                                                                     |
| fig 6666666.28482.peg.4268 | Contig_5 | 74538 | 74705 | + | hypothetical protein                                                    |             |                                                                                                                        |
| fig 6666666.28482.peg.4269 | Contig_5 | 75154 | 74798 | - | hypothetical protein                                                    | FIG00638284 | ff                                                                                                                     |
| fig 6666666.28482.peg.4270 | Contig_5 | 75226 | 76701 | + | FIG00820761: hypothetical protein                                       | FIG00820760 | ff                                                                                                                     |
| fig 6666666.28482.peg.4271 | Contig_5 | 77331 | 76903 | - | hypothetical protein                                                    |             |                                                                                                                        |
| fig 6666666.28482.peg.4272 | Contig_5 | 77615 | 78490 | + | FIG00823100: hypothetical protein                                       | FIG01363915 | ff                                                                                                                     |
| fig 6666666.28482.peg.4273 | Contig_5 | 79379 | 78555 | - | Beta-lactamase related protein                                          | FIG01424176 | ff                                                                                                                     |
| fig 6666666.28482.peg.4274 | Contig_5 | 81210 | 79657 | - | Choline dehydrogenase (EC 1.1.99.1)                                     | FIG00057416 | idu(4);Choline_uptake_and_conversion_to_betaine_clusters<br>idu(4);Choline_and_Betaine_Uptake_and_Betaine_Biosynthesis |
| fig 6666666.28482.peg.4275 | Contig_5 | 81458 | 81225 | - | hypothetical protein                                                    |             |                                                                                                                        |
| fig 6666666.28482.peg.4276 | Contig_5 | 82387 | 81464 | - | Alpha/beta hydrolase fold-3                                             |             |                                                                                                                        |
| fig 6666666.28482.peg.4277 | Contig_5 | 82924 | 82499 | - | hypothetical protein                                                    |             |                                                                                                                        |
| fig 6666666.28482.peg.4278 | Contig_5 | 83526 | 83005 | - | Transcriptional regulator, TetR family                                  |             |                                                                                                                        |
| fig 6666666.28482.peg.4279 | Contig_5 | 84756 | 83677 | - | alkylhydroperoxidase like protein, AhpD family                          |             |                                                                                                                        |
| fig 6666666.28482.peg.4280 | Contig_5 | 85758 | 84904 | - | Oxidoreductase, short-chain dehydrogenase/reductase family (EC 1.1.1.-) |             | idu(2);CBSS-291331.3.peg.3674<br>idu(2);Capsular_Polysaccharides_Biosynthesis_and_Assembly                             |
| fig 6666666.28482.peg.4281 | Contig_5 | 85932 | 85795 | - | hypothetical protein                                                    |             |                                                                                                                        |
| fig 6666666.28482.peg.4282 | Contig_5 | 86067 | 86711 | + | Transcriptional regulator, HxIR family                                  | FIG00906075 | ff                                                                                                                     |

|                            |           |       |       |   |                                                                         |             |                                                                    |
|----------------------------|-----------|-------|-------|---|-------------------------------------------------------------------------|-------------|--------------------------------------------------------------------|
| fig 6666666.28482.peg.4283 | Contig_5  | 86772 | 86915 | + | hypothetical protein                                                    |             |                                                                    |
| fig 6666666.28482.peg.4284 | Contig_5  | 90180 | 87097 | - | Replicative DNA helicase (EC 3.6.1.-) @ intein-containing               | FIG00018436 | isu;Inteins isu;DNA-replication                                    |
| fig 6666666.28482.peg.4285 | Contig_5  | 91171 | 90713 | - | LSU ribosomal protein L9p                                               | FIG00000205 | isu;Ribosome_LSU_bacterial                                         |
| fig 6666666.28482.peg.4286 | Contig_5  | 91456 | 91202 | - | SSU ribosomal protein S18p @ SSU ribosomal protein S18p, zinc-dependent | FIG01306972 | isu;Staphylococcal_pathogenicity_islands_SaPI                      |
| fig 6666666.28482.peg.4287 | Contig_50 | 1590  | 697   | - | Peptidyl-prolyl cis-trans isomerase (EC 5.2.1.8)                        | FIG01955868 | idu(1);Peptidyl-prolyl_cis-trans_isomerase_containing_cluster      |
| fig 6666666.28482.peg.4288 | Contig_50 | 1698  | 2360  | + | Hydroxyacylglutathione hydrolase (EC 3.1.2.6)                           | FIG00000013 | isu;CBSS-342610.3.peg.1536<br>isu;Glutathione:_Non-redox_reactions |
| fig 6666666.28482.peg.4289 | Contig_50 | 2384  | 3619  | + | Histidyl-tRNA synthetase (EC 6.1.1.21)                                  | FIG00000087 | isu;Methylglyoxal_Metabolism<br>isu;tRNA_aminoacylation,_His       |
| fig 6666666.28482.peg.4290 | Contig_50 | 3668  | 3976  | + | FIG00827542: hypothetical protein                                       | FIG00827541 | ff                                                                 |
| fig 6666666.28482.peg.4291 | Contig_50 | 4027  | 4500  | + | hypothetical protein                                                    |             |                                                                    |
| fig 6666666.28482.peg.4292 | Contig_50 | 4889  | 5008  | + | hypothetical protein                                                    |             |                                                                    |
| fig 6666666.28482.peg.4293 | Contig_50 | 5313  | 4993  | - | hypothetical protein                                                    |             |                                                                    |
| fig 6666666.28482.peg.4294 | Contig_50 | 5387  | 5506  | + | hypothetical protein                                                    |             |                                                                    |
| fig 6666666.28482.peg.4295 | Contig_51 | 113   | 1204  | + | FIG00824215: hypothetical protein                                       | FIG00824211 | ff                                                                 |
| fig 6666666.28482.peg.4296 | Contig_51 | 1478  | 2572  | + | Probable endopeptidase                                                  | FIG00994167 | ff                                                                 |
| fig 6666666.28482.peg.4297 | Contig_51 | 2535  | 3449  | + | FIG00821136: hypothetical protein                                       | FIG00821135 | ff                                                                 |

|                            |           |       |       |   |                                                                  |             |                                                                                                                                                          |
|----------------------------|-----------|-------|-------|---|------------------------------------------------------------------|-------------|----------------------------------------------------------------------------------------------------------------------------------------------------------|
| fig 6666666.28482.peg.4298 | Contig_51 | 3459  | 4601  | + | Poly(glycerol-phosphate) alpha-glucosyltransferase (EC 2.4.1.52) | FIG00139262 | isu;Teichoic_and_lipoteichoic_acids_biosynthesis                                                                                                         |
| fig 6666666.28482.peg.4299 | Contig_51 | 6511  | 4706  | - | Long-chain-fatty-acid--CoA ligase (EC 6.2.1.3)                   | FIG00018699 | idu(72);n-Phenylalkanoic_acid_degradation idu(72);Fatty_acid_metabolism_cluster idu(72);Biotin_synthesis_cluster idu(72);Biotin_biosynthesis             |
| fig 6666666.28482.peg.4300 | Contig_51 | 6692  | 7081  | + | FIG00995034: hypothetical protein                                | FIG00820471 | ff                                                                                                                                                       |
| fig 6666666.28482.peg.4301 | Contig_51 | 7182  | 7619  | + | FIG00821549: hypothetical protein                                | FIG00821548 | ff                                                                                                                                                       |
| fig 6666666.28482.peg.4302 | Contig_51 | 7729  | 8871  | + | Arsenical pump-driving ATPase (EC 3.6.3.16)                      | FIG00003088 | idu(2);Stress_related_cluster idu(2);Arsenic_resistance                                                                                                  |
| fig 6666666.28482.peg.4303 | Contig_51 | 8868  | 9257  | + | FIG00821592: hypothetical protein                                | FIG00821590 | ff                                                                                                                                                       |
| fig 6666666.28482.peg.4304 | Contig_51 | 9345  | 10073 | + | 1-acyl-sn-glycerol-3-phosphate acyltransferase (EC 2.3.1.51)     | FIG00005243 | idu(6);Glycerolipid_and_Glycerophospholipid_Metabolism_in_Bacteria idu(6);Ribosome_post-transcriptional_modification_and_chromosomal_segregation_cluster |
| fig 6666666.28482.peg.4305 | Contig_51 | 11305 | 10070 | - | Possible membrane protein                                        | FIG01121868 | ff                                                                                                                                                       |
| fig 6666666.28482.peg.4306 | Contig_51 | 11455 | 12339 | + | Possible membrane protein                                        | FIG01121868 | ff                                                                                                                                                       |
| fig 6666666.28482.peg.4307 | Contig_51 | 12372 | 12875 | + | FIG00994909: hypothetical protein                                | FIG00994907 | ff                                                                                                                                                       |

|                            |           |       |       |   |                                                                              |             |                                                                                                                               |
|----------------------------|-----------|-------|-------|---|------------------------------------------------------------------------------|-------------|-------------------------------------------------------------------------------------------------------------------------------|
| fig 6666666.28482.peg.4308 | Contig_51 | 12910 | 14298 | + | 2-keto-3-deoxy-D-arabino-heptulosonate-7-phosphate synthase II (EC 2.5.1.54) | FIG00133297 | isu;Chorismate_Synthesis<br>isu;Common_Pathway_For_Synthesis<br>_of_Aromatic_Compounds_(DAHP_sy<br>nthase_to_chorismate)      |
| fig 6666666.28482.peg.4309 | Contig_51 | 15580 | 14381 | - | Probable<br>serine/threonine-protein<br>kinase pknL (EC 2.7.11.1)            | FIG00547803 | ff                                                                                                                            |
| fig 6666666.28482.peg.4310 | Contig_51 | 15649 | 16053 | + | Conserved hypothetical<br>regulatory protein                                 | FIG00996715 | ff                                                                                                                            |
| fig 6666666.28482.peg.4311 | Contig_51 | 17551 | 16040 | - | Carotene biosynthesis<br>associated membrane<br>protein                      | FIG00861900 | ff                                                                                                                            |
| fig 6666666.28482.peg.4312 | Contig_51 | 18605 | 17556 | - | Geranylgeranyl<br>pyrophosphate<br>synthetase (EC 2.5.1.29)                  | FIG00051800 | ff                                                                                                                            |
| fig 6666666.28482.peg.4313 | Contig_51 | 18770 | 19678 | + | FIG00821173:<br>hypothetical protein                                         | FIG00821172 | ff                                                                                                                            |
| fig 6666666.28482.peg.4314 | Contig_51 | 20394 | 19675 | - | Lipoprotein LppM                                                             | FIG00997195 | ff                                                                                                                            |
| fig 6666666.28482.peg.4315 | Contig_51 | 21056 | 20448 | - | Acetyltransferase (EC<br>2.3.1.-)                                            | FIG01195044 | ff                                                                                                                            |
| fig 6666666.28482.peg.4316 | Contig_51 | 21373 | 21774 | + | hypothetical protein                                                         |             |                                                                                                                               |
| fig 6666666.28482.peg.4317 | Contig_51 | 22165 | 22596 | + | Cell division protein MraZ                                                   | FIG00000547 | icw(2);Bacterial_Cell_Division<br>icw(1);16S_rRNA_modification_withi<br>n_P_site_of_ribosome<br>icw(1);Bacterial_Cytoskeleton |
| fig 6666666.28482.peg.4318 | Contig_51 | 22748 | 23770 | + | rRNA small subunit<br>methyltransferase H                                    | FIG00000172 | icw(1);Bacterial_Cell_Division<br>icw(2);16S_rRNA_modification_withi<br>n_P_site_of_ribosome                                  |

|                            |           |       |       |   |                                                                                                    |             |                                                                                                                                                                                         |
|----------------------------|-----------|-------|-------|---|----------------------------------------------------------------------------------------------------|-------------|-----------------------------------------------------------------------------------------------------------------------------------------------------------------------------------------|
| fig 6666666.28482.peg.4319 | Contig_51 | 23767 | 24939 | + | FIG034299: proline rich membrane protein                                                           | FIG00862611 | ff                                                                                                                                                                                      |
| fig 6666666.28482.peg.4320 | Contig_51 | 24936 | 26948 | + | Cell division protein FtsI [Peptidoglycan synthetase] (EC 2.4.1.129)                               | FIG00046929 | idu(2);Bacterial_Cell_Division idu(2);16S_rRNA_modification_within_P_site_of_ribosome idu(2);Flagellum_in_Campylobacter idu(2);Bacterial_Cytoskeleton icw(1);Peptidoglycan_Biosynthesis |
| fig 6666666.28482.peg.4321 | Contig_51 | 27140 | 28660 | + | UDP-N-acetylmuramoylalanyl-D-glutamate--2,6-diaminopimelate ligase (EC 6.3.2.13)                   | FIG00000243 | icw(1);Peptidoglycan_biosynthesis--gjo isu;Methicillin_resistance_in_Staphylococci isu;Peptidoglycan_Biosynthesis                                                                       |
| fig 6666666.28482.peg.4322 | Contig_51 | 28657 | 30186 | + | UDP-N-acetylmuramoylalanyl-D-glutamyl-2,6-diaminopimelate--D-alanyl-D-alanine ligase (EC 6.3.2.10) | FIG00024401 | icw(2);Peptidoglycan_biosynthesis--gjo icw(1);Methicillin_resistance_in_Staphylococci icw(3);Peptidoglycan_Biosynthesis                                                                 |
| fig 6666666.28482.peg.4323 | Contig_51 | 30183 | 31262 | + | Phospho-N-acetylmuramoyl-pentapeptide-transferase (EC 2.7.8.13)                                    | FIG00000221 | icw(5);Peptidoglycan_Biosynthesis                                                                                                                                                       |
| fig 6666666.28482.peg.4324 | Contig_51 | 31264 | 32715 | + | UDP-N-acetylmuramoylalanine--D-glutamate ligase (EC 6.3.2.9)                                       | FIG00085033 | icw(1);Peptidoglycan_biosynthesis--gjo icw(1);Peptidoglycan_Biosynthesis                                                                                                                |
| fig 6666666.28482.peg.4325 | Contig_51 | 32721 | 34406 | + | Cell division protein FtsW                                                                         | FIG00000025 | idu(1);Bacterial_Cell_Division idu(1);Bacterial_Cytoskeleton                                                                                                                            |

|                            |           |       |       |   |                                                                                                                                    |             |                                                                                               |
|----------------------------|-----------|-------|-------|---|------------------------------------------------------------------------------------------------------------------------------------|-------------|-----------------------------------------------------------------------------------------------|
| fig 6666666.28482.peg.4326 | Contig_51 | 34403 | 35593 | + | UDP-N-acetylglucosamine--N-acetylmuramyl-(pentapeptide) pyrophosphoryl-undecaprenol N-acetylglucosamine transferase (EC 2.4.1.227) | FIG00047056 | icw(1);Peptidoglycan_Biosynthesis                                                             |
| fig 6666666.28482.peg.4327 | Contig_51 | 35590 | 37059 | + | UDP-N-acetylmuramate--alanine ligase (EC 6.3.2.8)                                                                                  | FIG00135554 | isu;Peptidoglycan_biosynthesis--gjo<br>icw(2);Peptidoglycan_Biosynthesis                      |
| fig 6666666.28482.peg.4328 | Contig_51 | 37056 | 37988 | + | Cell division protein FtsQ                                                                                                         | FIG00021517 | icw(1);Bacterial_Cell_Division<br>icw(1);Bacterial_Cytoskeleton<br>isu;CBSS-227882.1.peg.6980 |
| fig 6666666.28482.peg.4329 | Contig_52 | 323   | 553   | + | hypothetical protein                                                                                                               |             |                                                                                               |
| fig 6666666.28482.peg.4330 | Contig_52 | 1315  | 584   | - | FIG00996117: hypothetical protein                                                                                                  | FIG00820216 | ff                                                                                            |
| fig 6666666.28482.peg.4331 | Contig_52 | 2739  | 1303  | - | Cell envelope-associated transcriptional attenuator LytR-CpsA-Psr, subfamily A1 (as in PMID19099556)                               | FIG00025213 | idu(3);Cell_envelope-associated_LytR-CpsA-Psr_transcriptional_attenuators                     |
| fig 6666666.28482.peg.4332 | Contig_52 | 2868  | 3755  | + | dTDP-4-dehydrorhamnose reductase (EC 1.1.1.133)                                                                                    | FIG00000368 | isu;dTDP-rhamnose_synthesis<br>isu;Rhamnose_containing_glycans                                |

|                            |           |       |       |   |                                                                                                               |             |                                                                                             |
|----------------------------|-----------|-------|-------|---|---------------------------------------------------------------------------------------------------------------|-------------|---------------------------------------------------------------------------------------------|
| fig 6666666.28482.peg.4333 | Contig_52 | 3769  | 4641  | + | dTDP-Rha:A-D-GlcNAc-diphosphoryl polyprenol, A-3-L-rhamnosyl transferase WbbL                                 | FIG01030833 | icw(1);dTDP-rhamnose_synthesis                                                              |
| fig 6666666.28482.peg.4334 | Contig_52 | 4643  | 5722  | + | D-glycero-D-manno-heptose 1-phosphate guanosyltransferase                                                     | FIG00003212 | isu;Capsular_heptose_biosynthesis<br>isu;Capsular_Polysaccharides_Biosynthesis_and_Assembly |
| fig 6666666.28482.peg.4335 | Contig_52 | 6313  | 5780  | - | NTP pyrophosphohydrolases including oxidative damage repair enzymes                                           | FIG00004782 | idu(1);CBSS-216591.1.peg.168                                                                |
| fig 6666666.28482.peg.4336 | Contig_52 | 7884  | 6310  | - | probable DNA methylase                                                                                        | FIG01326804 | ff                                                                                          |
| fig 6666666.28482.peg.4337 | Contig_52 | 9247  | 7895  | - | Coenzyme F420-0:L-glutamate ligase @ Coenzyme F420-1:L-glutamate ligase / domain of unknown function          | FIG00009859 | isu;Coenzyme_F420_synthesis<br>isu;Coenzyme_F420_synthesis                                  |
| fig 6666666.28482.peg.4338 | Contig_52 | 10245 | 9253  | - | Lactyl (2) diphospho-(5')guanosine:7,8-didemethyl-8-hydroxy-5-deazariboflavin 2-phospho-L-lactate transferase | FIG00044377 | icw(1);Coenzyme_F420_synthesis                                                              |
| fig 6666666.28482.peg.4339 | Contig_52 | 10539 | 10904 | + | Sporulation regulatory protein WhiB                                                                           | FIG00019146 | isu;WhiB_and_WhiB-type_regulatory_proteins_                                                 |
| fig 6666666.28482.peg.4340 | Contig_52 | 11340 | 10918 | - | FIG00822333: hypothetical protein                                                                             | FIG00822329 | ff                                                                                          |
| fig 6666666.28482.peg.4341 | Contig_52 | 11563 | 11964 | + | hypothetical protein                                                                                          |             |                                                                                             |

|                            |           |       |       |   |                                                        |             |                                                                                                                                                                                                                                                                                                                                                             |
|----------------------------|-----------|-------|-------|---|--------------------------------------------------------|-------------|-------------------------------------------------------------------------------------------------------------------------------------------------------------------------------------------------------------------------------------------------------------------------------------------------------------------------------------------------------------|
| fig 6666666.28482.peg.4342 | Contig_52 | 13064 | 11961 | - | hypothetical protein                                   | FIG00638284 | ff                                                                                                                                                                                                                                                                                                                                                          |
| fig 6666666.28482.peg.4343 | Contig_53 | 71    | 1381  | + | Translation initiation factor 2                        | FIG00000102 | icw(1);CBSS-138119.3.peg.2719<br>isu;NusA-TFII_Cluster<br>isu;Translation_initiation_factors_bac<br>terial icw(1);CBSS-350688.3.peg.1509                                                                                                                                                                                                                    |
| fig 6666666.28482.peg.4344 | Contig_53 | 1433  | 1915  | + | Ribosome-binding factor A                              | FIG00000164 | icw(2);CBSS-138119.3.peg.2719<br>icw(1);NusA-TFII_Cluster<br>icw(1);Translation_initiation_factors_<br>bacterial isu;CBSS-350688.3.peg.1509                                                                                                                                                                                                                 |
| fig 6666666.28482.peg.4345 | Contig_53 | 1890  | 2900  | + | FIG146085: 3'-to-5' oligoribonuclease A, Bacillus type | FIG00002194 | isu;CBSS-138119.3.peg.2719<br>isu;RNA_processing_and_degradatio<br>n,_bacterial                                                                                                                                                                                                                                                                             |
| fig 6666666.28482.peg.4346 | Contig_53 | 3483  | 2908  | - | FIG00829495: hypothetical protein                      | FIG00829492 | ff                                                                                                                                                                                                                                                                                                                                                          |
| fig 6666666.28482.peg.4347 | Contig_53 | 4239  | 3493  | - | Enoyl-CoA hydratase (EC 4.2.1.17)                      | FIG00033206 | idu(51);n-<br>Phenylalkanoic_acid_degradation<br>idu(51);Polyhydroxybutyrate_metabo<br>lism idu(51);Isoleucine_degradation<br>idu(51);Fatty_acid_metabolism_clust<br>er idu(51);Lysine_fermentation<br>idu(51);Butanol_Biosynthesis<br>idu(51);Acetyl-<br>CoA_fermentation_to_Butyrate<br>idu(51);Valine_degradation<br>idu(51);Butyrate_metabolism_cluster |
| fig 6666666.28482.peg.4348 | Contig_53 | 4380  | 4649  | + | COGs COG0840                                           | FIG01320521 | ff                                                                                                                                                                                                                                                                                                                                                          |

|                            |           |       |       |   |                                                            |             |                                                                                                                                                                                                                                                                                                            |
|----------------------------|-----------|-------|-------|---|------------------------------------------------------------|-------------|------------------------------------------------------------------------------------------------------------------------------------------------------------------------------------------------------------------------------------------------------------------------------------------------------------|
| fig 6666666.28482.peg.4349 | Contig_53 | 4646  | 5194  | + | FIG00820705:<br>hypothetical protein                       | FIG00820704 | ff                                                                                                                                                                                                                                                                                                         |
| fig 6666666.28482.peg.4350 | Contig_53 | 6889  | 5153  | - | Possible hydrolase                                         | FIG01381897 | ff                                                                                                                                                                                                                                                                                                         |
| fig 6666666.28482.peg.4351 | Contig_53 | 7504  | 6923  | - | Possible membrane<br>protein                               | FIG01121868 | ff                                                                                                                                                                                                                                                                                                         |
| fig 6666666.28482.peg.4352 | Contig_53 | 7627  | 8592  | + | putative SimX4 homolog                                     | FIG01127638 | ff                                                                                                                                                                                                                                                                                                         |
| fig 6666666.28482.peg.4353 | Contig_53 | 8589  | 9272  | + | 4'-phosphopantetheinyl<br>transferase EntD (EC<br>2.7.8.-) | FIG01124387 | ff                                                                                                                                                                                                                                                                                                         |
| fig 6666666.28482.peg.4354 | Contig_53 | 9269  | 10150 | + | tRNA pseudouridine<br>synthase B (EC 4.2.1.70)             | FIG01016270 | isu;CBSS-138119.3.peg.2719<br>isu;tRNA_processing<br>isu;RNA_pseudouridine_syntheses<br>isu;CBSS-350688.3.peg.1509                                                                                                                                                                                         |
| fig 6666666.28482.peg.4355 | Contig_53 | 10982 | 10155 | - | hypothetical protein                                       | FIG00638284 | ff                                                                                                                                                                                                                                                                                                         |
| fig 6666666.28482.peg.4356 | Contig_53 | 11149 | 12339 | + | 3-ketoacyl-CoA thiolase<br>(EC 2.3.1.16)                   | FIG01279374 | idu(11);CBSS-246196.1.peg.364<br>idu(11);Serine-glyoxylate_cycle<br>idu(11);n-<br>Phenylalkanoic_acid_degradation<br>idu(11);Polyhydroxybutyrate_metabo<br>lism icw(1);Isoleucine_degradation<br>idu(11);Fatty_acid_metabolism_clust<br>er idu(11);Biotin_synthesis_cluster<br>idu(11);Biotin_biosynthesis |

|                            |           |       |       |   |                                                                        |             |                                                                                                                                                                                                                        |
|----------------------------|-----------|-------|-------|---|------------------------------------------------------------------------|-------------|------------------------------------------------------------------------------------------------------------------------------------------------------------------------------------------------------------------------|
| fig 6666666.28482.peg.4357 | Contig_53 | 12347 | 13582 | + | Butyryl-CoA dehydrogenase (EC 1.3.99.2)                                | FIG00009149 | idu(39);Isoleucine_degradation<br>idu(39);Lysine_fermentation<br>idu(39);Butanol_Biosynthesis<br>idu(39);Acetyl-CoA_fermentation_to_Butyrate<br>idu(39);Valine_degradation<br>idu(39);Anaerobic_respiratory_reductions |
| fig 6666666.28482.peg.4358 | Contig_53 | 14283 | 13579 | - | Mn-dependent transcriptional regulator MntR                            | FIG00634996 | ff                                                                                                                                                                                                                     |
| fig 6666666.28482.peg.4359 | Contig_53 | 14429 | 15352 | + | Riboflavin kinase (EC 2.7.1.26) / FMN adenylyltransferase (EC 2.7.7.2) | FIG00000220 | isu;Riboflavin,_FMN_and_FAD_metabolism<br>isu;Riboflavin,_FMN_and_FAD_metabolism<br>isu;CBSS-350688.3.peg.1509<br>icw(1);CBSS-350688.3.peg.1509<br>isu;riboflavin_to_FAD<br>isu;riboflavin_to_FAD                      |
| fig 6666666.28482.peg.4360 | Contig_53 | 15616 | 15927 | + | SSU ribosomal protein S15p (S13e)                                      | FIG00000144 | icw(1);CBSS-350688.3.peg.1509                                                                                                                                                                                          |
| fig 6666666.28482.peg.4361 | Contig_53 | 16276 | 18522 | + | Polyribonucleotide nucleotidyltransferase (EC 2.7.7.8)                 | FIG00000391 | isu;Polyadenylation_bacterial<br>icw(3);CBSS-350688.3.peg.1509<br>icw(1);CBSS-1806.1.peg.3045                                                                                                                          |
| fig 6666666.28482.peg.4362 | Contig_53 | 18503 | 19864 | + | FIG007959: peptidase, M16 family                                       | FIG00007959 | icw(2);CBSS-350688.3.peg.1509<br>isu;CBSS-1806.1.peg.3045                                                                                                                                                              |
| fig 6666666.28482.peg.4363 | Contig_53 | 19925 | 20947 | + | 2-nitropropane dioxygenase (EC 1.13.11.32)                             | FIG01304356 | idu(5);CBSS-164757.7.peg.5020                                                                                                                                                                                          |
| fig 6666666.28482.peg.4364 | Contig_53 | 20985 | 21170 | + | hypothetical protein                                                   |             |                                                                                                                                                                                                                        |
| fig 6666666.28482.peg.4365 | Contig_53 | 22061 | 21366 | - | hypothetical protein                                                   | FIG00638284 | ff                                                                                                                                                                                                                     |
| fig 6666666.28482.peg.4366 | Contig_53 | 22122 | 22637 | + | Transcriptional regulator, AsnC family                                 | FIG01956023 | ff                                                                                                                                                                                                                     |

|                            |           |       |       |   |                                                       |             |                                                                                         |
|----------------------------|-----------|-------|-------|---|-------------------------------------------------------|-------------|-----------------------------------------------------------------------------------------|
| fig 6666666.28482.peg.4367 | Contig_53 | 22653 | 24113 | + | Cyclohexanone monooxygenase (EC 1.14.13.22)           | FIG00975774 | ff                                                                                      |
| fig 6666666.28482.peg.4368 | Contig_53 | 24167 | 25075 | + | FF domain protein                                     | FIG01341765 | ff                                                                                      |
| fig 6666666.28482.peg.4369 | Contig_53 | 25079 | 26839 | + | FIG00824361: hypothetical protein                     | FIG00824358 | ff                                                                                      |
| fig 6666666.28482.peg.4370 | Contig_53 | 26850 | 27926 | + | Vanillate O-demethylase oxidoreductase (EC 1.14.13.-) | FIG01303955 | idu(2);Anaerobic_respiratory_reductases                                                 |
| fig 6666666.28482.peg.4371 | Contig_53 | 28425 | 27913 | - | Acetyltransferase, GNAT family                        |             |                                                                                         |
| fig 6666666.28482.peg.4372 | Contig_53 | 29083 | 28442 | - | Transcriptional regulator, TetR family                | FIG00554417 | ff                                                                                      |
| fig 6666666.28482.peg.4373 | Contig_53 | 29142 | 30122 | + | FIG00826122: hypothetical protein                     | FIG00826121 | ff                                                                                      |
| fig 6666666.28482.peg.4374 | Contig_53 | 30129 | 31208 | + | FIG00823153: hypothetical protein                     | FIG00823152 | ff                                                                                      |
| fig 6666666.28482.peg.4375 | Contig_53 | 32585 | 31218 | - | Partial REP13E12 repeat protein                       | FIG00820827 | ff                                                                                      |
| fig 6666666.28482.peg.4376 | Contig_53 | 32990 | 32706 | - | hypothetical protein                                  |             |                                                                                         |
| fig 6666666.28482.peg.4377 | Contig_53 | 33179 | 33916 | + | Dihydrodipicolinate reductase (EC 1.3.1.26)           | FIG00000347 | isu;Lysine_Biosynthesis_DAP_Pathway,_GJO_scratch<br>isu;Lysine_Biosynthesis_DAP_Pathway |
| fig 6666666.28482.peg.4378 | Contig_53 | 33913 | 34371 | + | FIG00826342: hypothetical protein                     | FIG00826340 | ff                                                                                      |
| fig 6666666.28482.peg.4379 | Contig_53 | 34368 | 34823 | + | Multimeric flavodoxin WrbA                            | FIG01193004 | ff                                                                                      |
| fig 6666666.28482.peg.4380 | Contig_53 | 35656 | 34808 | - | TesB-like acyl-CoA thioesterase 4                     | FIG00085764 | idu(2);Acyl-CoA_thioesterase_II                                                         |

|                            |           |       |       |   |                                                                 |             |                                                                                                                                                            |
|----------------------------|-----------|-------|-------|---|-----------------------------------------------------------------|-------------|------------------------------------------------------------------------------------------------------------------------------------------------------------|
| fig 6666666.28482.peg.4381 | Contig_53 | 35706 | 37232 | + | Long-chain-fatty-acid--<br>CoA ligase (EC 6.2.1.3)              | FIG00018699 | idu(72);n-<br>Phenylalkanoic_acid_degradation<br>idu(72);Fatty_acid_metabolism_clust<br>er idu(72);Biotin_synthesis_cluster<br>idu(72);Biotin_biosynthesis |
| fig 6666666.28482.peg.4382 | Contig_53 | 37229 | 40432 | + | FIG00828084:<br>hypothetical protein                            | FIG00828083 | ff                                                                                                                                                         |
| fig 6666666.28482.peg.4383 | Contig_53 | 40758 | 40444 | - | PE-PGRS family protein                                          | FIG01371720 | idu(16);PPE_gene_cluster_in_Mycob<br>acteria                                                                                                               |
| fig 6666666.28482.peg.4384 | Contig_53 | 40870 | 41637 | + | 3-oxoacyl-[acyl-carrier<br>protein] reductase (EC<br>1.1.1.100) | FIG00621114 | idu(38);CBSS-246196.1.peg.364<br>idu(38);CBSS-164757.7.peg.5020<br>idu(38);Fatty_Acid_Biosynthesis_FASI<br>I                                               |
| fig 6666666.28482.peg.4385 | Contig_53 | 41634 | 42827 | + | putative acyl-CoA<br>dehydrogenase                              | FIG00476656 | ff                                                                                                                                                         |
| fig 6666666.28482.peg.4386 | Contig_53 | 42824 | 43915 | + | Acyl-CoA dehydrogenase<br>(EC 1.3.99.-)                         | FIG00820935 | ff                                                                                                                                                         |
| fig 6666666.28482.peg.4387 | Contig_53 | 44917 | 46161 | + | possible<br>glycosyltransferase                                 | FIG01399847 | ff                                                                                                                                                         |
| fig 6666666.28482.peg.4388 | Contig_53 | 46890 | 46150 | - | Dienelactone hydrolase<br>family                                | FIG01069253 | ff                                                                                                                                                         |
| fig 6666666.28482.peg.4389 | Contig_53 | 46933 | 47733 | + | Thymidylate synthase (EC<br>2.1.1.45)                           | FIG00000398 | icw(1);Folate_Biosynthesis<br>isu;pyrimidine_conversions                                                                                                   |
| fig 6666666.28482.peg.4390 | Contig_53 | 47823 | 48266 | + | Dihydrofolate reductase<br>(EC 1.5.1.3)                         | FIG00000048 | idu(3);Folate_Biosynthesis                                                                                                                                 |
| fig 6666666.28482.peg.4391 | Contig_53 | 48378 | 49079 | + | FIG00820787:<br>hypothetical protein                            | FIG00820786 | ff                                                                                                                                                         |
| fig 6666666.28482.peg.4392 | Contig_53 | 49133 | 50365 | + | FIG00822893:<br>hypothetical protein                            | FIG00815749 | ff                                                                                                                                                         |

|                            |           |       |       |   |                                                                                       |             |                                                                                                               |
|----------------------------|-----------|-------|-------|---|---------------------------------------------------------------------------------------|-------------|---------------------------------------------------------------------------------------------------------------|
| fig 6666666.28482.peg.4393 | Contig_53 | 50365 | 51705 | + | Type I restriction-modification system, DNA-methyltransferase subunit M (EC 2.1.1.72) | FIG00000477 | icw(1);Restriction-Modification_System<br>icw(1);Type_I_Restriction-Modification                              |
| fig 6666666.28482.peg.4394 | Contig_53 | 51702 | 52760 | + | Type I restriction-modification system, specificity subunit S (EC 3.1.21.3)           | FIG00000494 | isu;Restriction-Modification_System<br>isu;Type_I_Restriction-Modification                                    |
| fig 6666666.28482.peg.4395 | Contig_53 | 52858 | 53610 | + | Thymidylate synthase thyX (EC 2.1.1.-)                                                | FIG00001348 | isu;Folate_Biosynthesis                                                                                       |
| fig 6666666.28482.peg.4396 | Contig_53 | 53718 | 54620 | + | Dihydrodipicolinate synthase (EC 4.2.1.52)                                            | FIG00019600 | isu;Lysine_Biosynthesis_DAP_Pathway,_GJO_scratch<br>isu;Lysine_Biosynthesis_DAP_Pathway                       |
| fig 6666666.28482.peg.4397 | Contig_53 | 54628 | 56304 | + | Ribonuclease J2 (endoribonuclease in RNA processing)                                  | FIG01303963 | isu;Ribonucleases_in_Bacillus                                                                                 |
| fig 6666666.28482.peg.4398 | Contig_53 | 57173 | 56301 | - | O-Methyltransferase involved in polyketide biosynthesis                               | FIG01313020 | ff                                                                                                            |
| fig 6666666.28482.peg.4399 | Contig_53 | 58004 | 57180 | - | Dehydrogenase                                                                         | FIG01323940 | ff                                                                                                            |
| fig 6666666.28482.peg.4400 | Contig_53 | 58315 | 58001 | - | Antibiotic biosynthesis monooxygenase                                                 | FIG00027695 | idu(1);CBSS-1085.1.peg.1363                                                                                   |
| fig 6666666.28482.peg.4401 | Contig_53 | 58648 | 60966 | + | Cell division protein FtsK                                                            | FIG00000287 | isu;Unspecified_monosaccharide_transport_cluster<br>isu;Bacterial_Cell_Division<br>isu;Bacterial_Cytoskeleton |
| fig 6666666.28482.peg.4402 | Contig_53 | 61521 | 61033 | - | Acetyltransferase, GNAT family                                                        | FIG00989082 | ff                                                                                                            |

|                            |           |       |       |   |                                                                                            |             |                                                                        |
|----------------------------|-----------|-------|-------|---|--------------------------------------------------------------------------------------------|-------------|------------------------------------------------------------------------|
| fig 6666666.28482.peg.4403 | Contig_53 | 61635 | 62207 | + | CDP-diacylglycerol--<br>glycerol-3-phosphate 3-<br>phosphatidyltransferase<br>(EC 2.7.8.5) | FIG00001550 | idu(2);Glycerolipid_and_Glycerophos<br>pholipid_Metabolism_in_Bacteria |
| fig 6666666.28482.peg.4404 | Contig_53 | 62311 | 62646 | + | Transcriptional regulator,<br>XRE family                                                   | FIG01123280 | ff                                                                     |
| fig 6666666.28482.peg.4405 | Contig_53 | 62760 | 63578 | + | Phage shock protein A<br>(IM30) , suppresses<br>sigma54-dependent<br>transcription         | FIG00815031 | ff                                                                     |
| fig 6666666.28482.peg.4406 | Contig_54 | 58    | 276   | + | PPE family protein                                                                         | FIG00013075 | icw(2);CBSS-164757.7.peg.5020                                          |
| fig 6666666.28482.peg.4407 | Contig_54 | 840   | 2078  | + | PPE family protein                                                                         | FIG00013075 | icw(3);CBSS-164757.7.peg.5020                                          |
| fig 6666666.28482.peg.4408 | Contig_54 | 2130  | 3359  | + | PPE family protein                                                                         | FIG00013075 | icw(3);CBSS-164757.7.peg.5020                                          |
| fig 6666666.28482.peg.4409 | Contig_54 | 3715  | 4014  | + | PE family protein                                                                          | FIG01313150 | ff                                                                     |
| fig 6666666.28482.peg.4410 | Contig_54 | 4241  | 4537  | + | FIG00824639:<br>hypothetical protein                                                       | FIG00823510 | ff                                                                     |
| fig 6666666.28482.peg.4411 | Contig_54 | 4588  | 4872  | + | ESAT-6-like protein EsxL                                                                   | FIG00820465 | ff                                                                     |
| fig 6666666.28482.peg.4412 | Contig_54 | 5817  | 4936  | - | PPE family protein                                                                         | FIG00013075 | icw(2);CBSS-164757.7.peg.5020                                          |
| fig 6666666.28482.peg.4413 | Contig_54 | 6529  | 7302  | + | DNA-binding response<br>regulator TrcR                                                     | FIG01310367 | ff                                                                     |
| fig 6666666.28482.peg.4414 | Contig_54 | 7299  | 8837  | + | Sensor protein<br>basS/pmrB (EC 2.7.3.-)                                                   | FIG00000853 | isu;Lipid_A_modifications                                              |
| fig 6666666.28482.peg.4415 | Contig_54 | 9232  | 10902 | + | Potassium-transporting<br>ATPase A chain (EC<br>3.6.3.12) (TC 3.A.3.7.1)                   | FIG00002960 | isu;Potassium_homeostasis                                              |
| fig 6666666.28482.peg.4416 | Contig_54 | 10902 | 13052 | + | Potassium-transporting<br>ATPase B chain (EC<br>3.6.3.12) (TC 3.A.3.7.1)                   | FIG00046742 | icw(3);Potassium_homeostasis                                           |

|                            |           |       |       |   |                                                                    |             |                                                                     |
|----------------------------|-----------|-------|-------|---|--------------------------------------------------------------------|-------------|---------------------------------------------------------------------|
| fig 6666666.28482.peg.4417 | Contig_54 | 13054 | 13977 | + | Potassium-transporting ATPase C chain (EC 3.6.3.12) (TC 3.A.3.7.1) | FIG00007507 | icw(1);Potassium_homeostasis                                        |
| fig 6666666.28482.peg.4418 | Contig_54 | 14001 | 16559 | + | Osmosensitive K+ channel histidine kinase KdpD (EC 2.7.3.-)        | FIG00000846 | icw(1);Potassium_homeostasis                                        |
| fig 6666666.28482.peg.4419 | Contig_54 | 16609 | 17289 | + | DNA-binding response regulator KdpE                                |             |                                                                     |
| fig 6666666.28482.peg.4420 | Contig_55 | 301   | 879   | + | FIG00820113: hypothetical protein                                  | FIG00820111 | ff                                                                  |
| fig 6666666.28482.peg.4421 | Contig_55 | 1449  | 967   | - | MCE-associated transmembrane protein                               | FIG00820242 | ff                                                                  |
| fig 6666666.28482.peg.4422 | Contig_55 | 2105  | 1449  | - | MCE-associated alanine and valine rich protein                     | FIG00820054 | ff                                                                  |
| fig 6666666.28482.peg.4423 | Contig_55 | 3862  | 2141  | - | MCE-family protein Mce1F                                           | FIG00821171 | idu(7);Mycobacterium_virulence_operon_MCE_involved_in_cell_invasion |
| fig 6666666.28482.peg.4424 | Contig_55 | 5039  | 3873  | - | MCE-family lipoprotein LprK (MCE-family lipoprotein Mce1e)         | FIG00819998 | icw(3);Mycobacterium_virulence_operon_MCE_involved_in_cell_invasion |
| fig 6666666.28482.peg.4425 | Contig_55 | 6433  | 5036  | - | MCE-family protein Mce1D                                           | FIG00820669 | icw(1);Mycobacterium_virulence_operon_MCE_involved_in_cell_invasion |
| fig 6666666.28482.peg.4426 | Contig_55 | 7521  | 6457  | - | MCE-family protein Mce1C                                           | FIG00821293 | icw(7);Mycobacterium_virulence_operon_MCE_involved_in_cell_invasion |

|                            |           |       |       |   |                                                                         |             |                                                                                                                                                                                                                                |
|----------------------------|-----------|-------|-------|---|-------------------------------------------------------------------------|-------------|--------------------------------------------------------------------------------------------------------------------------------------------------------------------------------------------------------------------------------|
| fig 6666666.28482.peg.4427 | Contig_55 | 8563  | 7511  | - | MCE-family protein<br>Mce1B                                             | FIG00763551 | icw(5);Mycobacterium_virulence_op<br>eron_MCE_involved_in_cell_invasion                                                                                                                                                        |
| fig 6666666.28482.peg.4428 | Contig_55 | 9765  | 8563  | - | MCE-family protein<br>Mce1A                                             | FIG00820494 | icw(2);Mycobacterium_virulence_op<br>eron_MCE_involved_in_cell_invasion                                                                                                                                                        |
| fig 6666666.28482.peg.4429 | Contig_55 | 10627 | 9785  | - | Conserved hypothetical<br>integral membrane<br>protein YrbE1B           | FIG00691621 | icw(3);Mycobacterium_virulence_op<br>eron_MCE_involved_in_cell_invasion                                                                                                                                                        |
| fig 6666666.28482.peg.4430 | Contig_55 | 11366 | 10635 | - | Conserved hypothetical<br>integral membrane<br>protein YrbE1A           | FIG00690583 | idu(7);Mycobacterium_virulence_ope<br>ron_MCE_involved_in_cell_invasion                                                                                                                                                        |
| fig 6666666.28482.peg.4431 | Contig_55 | 12506 | 11637 | - | Probable short-chain<br>type<br>dehydrogenase/reductas<br>e (EC 1.-.-.) | FIG00026991 | idu(2);CBSS-164757.7.peg.5020                                                                                                                                                                                                  |
| fig 6666666.28482.peg.4432 | Contig_55 | 12767 | 12576 | - | Ferredoxin                                                              | FIG00001676 | idu(4);Soluble_cytochromes_and_fun<br>ctionally_related_electron_carriers<br>idu(4);Inorganic_Sulfur_Assimilation                                                                                                              |
| fig 6666666.28482.peg.4433 | Contig_55 | 12957 | 14138 | + | FadE30                                                                  | FIG00457540 | icw(1);CBSS-164757.7.peg.5020                                                                                                                                                                                                  |
| fig 6666666.28482.peg.4434 | Contig_55 | 14172 | 15269 | + | Butyryl-CoA<br>dehydrogenase (EC<br>1.3.99.2)                           | FIG00009149 | idu(39);Isoleucine_degradation<br>idu(39);Lysine_fermentation<br>idu(39);Butanol_Biosynthesis<br>idu(39);Acetyl-<br>CoA_fermentation_to_Butyrate<br>idu(39);Valine_degradation<br>idu(39);Anaerobic_respiratory_reduc<br>tases |

|                            |           |       |       |   |                                                         |             |                                                                                                                                                        |
|----------------------------|-----------|-------|-------|---|---------------------------------------------------------|-------------|--------------------------------------------------------------------------------------------------------------------------------------------------------|
| fig 6666666.28482.peg.4435 | Contig_55 | 15301 | 16818 | + | Long-chain-fatty-acid--<br>CoA ligase (EC 6.2.1.3)      | FIG00018699 | icw(1);n-<br>Phenylalkanoic_acid_degradation<br>icw(1);Fatty_acid_metabolism_cluste<br>r icw(1);Biotin_synthesis_cluster<br>icw(1);Biotin_biosynthesis |
| fig 6666666.28482.peg.4436 | Contig_55 | 16800 | 17513 | + | FIG00824473:<br>hypothetical protein                    | FIG00824470 | ff                                                                                                                                                     |
| fig 6666666.28482.peg.4437 | Contig_55 | 19086 | 17536 | - | COG0028: Thiamine<br>pyrophosphate-requiring<br>enzymes | FIG00452446 | ff                                                                                                                                                     |
| fig 6666666.28482.peg.4438 | Contig_55 | 19907 | 19083 | - | PROBABLE ANTIBIOTIC-<br>RESISTANCE PROTEIN              | FIG01366849 | ff                                                                                                                                                     |
| fig 6666666.28482.peg.4439 | Contig_55 | 21609 | 19960 | - | Long-chain-fatty-acid--<br>CoA ligase (EC 6.2.1.3)      | FIG00018699 | icw(1);n-<br>Phenylalkanoic_acid_degradation<br>icw(1);Fatty_acid_metabolism_cluste<br>r icw(1);Biotin_synthesis_cluster<br>icw(1);Biotin_biosynthesis |

|                            |           |       |       |   |                                           |             |                                                                                                                                                                                                                                                                                                                         |
|----------------------------|-----------|-------|-------|---|-------------------------------------------|-------------|-------------------------------------------------------------------------------------------------------------------------------------------------------------------------------------------------------------------------------------------------------------------------------------------------------------------------|
| fig 6666666.28482.peg.4440 | Contig_55 | 21674 | 22486 | + | Enoyl-CoA hydratase (EC 4.2.1.17)         | FIG00033206 | icw(1);n-Phenylalkanoic_acid_degradation idu(51);Polyhydroxybutyrate_metabolism idu(51);Isoleucine_degradation icw(1);Fatty_acid_metabolism_cluster idu(51);Lysine_fermentation idu(51);Butanol_Biosynthesis idu(51);Acetyl-CoA_fermentation_to_Butyrate idu(51);Valine_degradation idu(51);Butyrate_metabolism_cluster |
| fig 6666666.28482.peg.4441 | Contig_55 | 23889 | 22687 | - | putative cytochrome P450 hydroxylase      | FIG00032437 | idu(49);Nitric_oxide_synthase                                                                                                                                                                                                                                                                                           |
| fig 6666666.28482.peg.4442 | Contig_55 | 24602 | 23886 | - | Acetoacetate decarboxylase family protein | FIG00822635 | ff                                                                                                                                                                                                                                                                                                                      |
| fig 6666666.28482.peg.4443 | Contig_55 | 25698 | 24646 | - | Coenzyme F420-dependent oxidoreductase    | FIG00015014 | idu(3);Anaerobic_respiratory_reductases                                                                                                                                                                                                                                                                                 |
| fig 6666666.28482.peg.4444 | Contig_55 | 25790 | 26755 | + | FIG00996312: hypothetical protein         | FIG00820395 | ff                                                                                                                                                                                                                                                                                                                      |
| fig 6666666.28482.peg.4445 | Contig_55 | 26771 | 27832 | + | Lipid-transfer protein                    | FIG01125818 | ff                                                                                                                                                                                                                                                                                                                      |
| fig 6666666.28482.peg.4446 | Contig_55 | 27832 | 29025 | + | 3-ketoacyl-CoA thiolase                   | FIG00664812 | ff                                                                                                                                                                                                                                                                                                                      |
| fig 6666666.28482.peg.4447 | Contig_55 | 29022 | 29429 | + | FIG00826355: hypothetical protein         | FIG00826353 | ff                                                                                                                                                                                                                                                                                                                      |
| fig 6666666.28482.peg.4448 | Contig_55 | 29950 | 29426 | - | carbonic anhydrase, family 3              | FIG00553719 | ff                                                                                                                                                                                                                                                                                                                      |

|                            |           |       |       |   |                                                                                                                                     |             |                                                                                                              |
|----------------------------|-----------|-------|-------|---|-------------------------------------------------------------------------------------------------------------------------------------|-------------|--------------------------------------------------------------------------------------------------------------|
| fig 6666666.28482.peg.4449 | Contig_55 | 30062 | 31231 | + | Terminal oxygenase KshA                                                                                                             | FIG01318144 | ff                                                                                                           |
| fig 6666666.28482.peg.4450 | Contig_55 | 31236 | 31685 | + | FIG00820011:<br>hypothetical protein                                                                                                | FIG00820010 | ff                                                                                                           |
| fig 6666666.28482.peg.4451 | Contig_55 | 33008 | 31863 | - | FIG00994930:<br>hypothetical protein                                                                                                | FIG00820936 | ff                                                                                                           |
| fig 6666666.28482.peg.4452 | Contig_55 | 33781 | 33008 | - | short chain<br>dehydrogenase                                                                                                        |             |                                                                                                              |
| fig 6666666.28482.peg.4453 | Contig_55 | 34920 | 33793 | - | FIG00994788:<br>hypothetical protein                                                                                                | FIG00822710 | ff                                                                                                           |
| fig 6666666.28482.peg.4454 | Contig_55 | 35223 | 35008 | - | hypothetical protein                                                                                                                | FIG00638284 | ff                                                                                                           |
| fig 6666666.28482.peg.4455 | Contig_55 | 36594 | 35371 | - | PPE family protein                                                                                                                  | FIG00013075 | icw(1);CBSS-164757.7.peg.5020                                                                                |
| fig 6666666.28482.peg.4456 | Contig_55 | 38517 | 36757 | - | PPE family protein                                                                                                                  | FIG00013075 | icw(1);CBSS-164757.7.peg.5020                                                                                |
| fig 6666666.28482.peg.4457 | Contig_55 | 39710 | 38652 | - | 4-hydroxy-2-oxovalerate<br>aldolase (EC 4.1.3.-)                                                                                    | FIG00001725 | ff                                                                                                           |
| fig 6666666.28482.peg.4458 | Contig_55 | 40624 | 39707 | - | Acetaldehyde<br>dehydrogenase,<br>acetylating, (EC 1.2.1.10)<br>in gene cluster for<br>degradation of phenols,<br>cresols, catechol | FIG00002495 | idu(1);Central_meta-<br>cleavage_pathway_of_aromatic_com<br>pound_degradation<br>idu(1);Biphenyl_Degradation |
| fig 6666666.28482.peg.4459 | Contig_55 | 41452 | 40667 | - | 2-keto-4-pentenoate<br>hydratase (EC 4.2.1.-)                                                                                       | FIG01304357 | ff                                                                                                           |
| fig 6666666.28482.peg.4460 | Contig_55 | 41516 | 43207 | + | 3-oxosteroid 1-<br>dehydrogenase (EC<br>1.3.99.4)                                                                                   | FIG01318047 | ff                                                                                                           |
| fig 6666666.28482.peg.4461 | Contig_55 | 43209 | 44069 | + | Enoyl-CoA hydratase                                                                                                                 | FIG00999917 | ff                                                                                                           |
| fig 6666666.28482.peg.4462 | Contig_55 | 44125 | 45879 | + | Uncharacterized NTE<br>family protein                                                                                               | FIG01324713 | ff                                                                                                           |
| fig 6666666.28482.peg.4463 | Contig_55 | 46028 | 46975 | + | adenylate cyclase                                                                                                                   |             |                                                                                                              |

|                            |           |       |       |   |                                                                                   |             |                                                                                      |
|----------------------------|-----------|-------|-------|---|-----------------------------------------------------------------------------------|-------------|--------------------------------------------------------------------------------------|
| fig 6666666.28482.peg.4464 | Contig_55 | 47802 | 47002 | - | FIG00824875:<br>hypothetical protein                                              | FIG00824874 | ff                                                                                   |
| fig 6666666.28482.peg.4465 | Contig_55 | 49129 | 47960 | - | Lipid carrier protein IgrF                                                        | FIG00010128 | icw(1);Cholesterol_catabolic_operon_in_Mycobacteria                                  |
| fig 6666666.28482.peg.4466 | Contig_55 | 49530 | 49129 | - | Enoyl coenzyme A hydratase IgrE                                                   | FIG00018965 | isu;Cholesterol_catabolic_operon_in_Mycobacteria                                     |
| fig 6666666.28482.peg.4467 | Contig_55 | 50489 | 49527 | - | Conserved protein IgrD                                                            | FIG00026271 | icw(5);Cholesterol_catabolic_operon_in_Mycobacteria                                  |
| fig 6666666.28482.peg.4468 | Contig_55 | 51649 | 50486 | - | Probable acyl-CoA dehydrogenase FadE29 (EC 1.3.99.-); Acyl-CoA dehydrogenase IgrC | FIG00118764 | isu;CBSS-164757.7.peg.5020<br>icw(2);Cholesterol_catabolic_operon_in_Mycobacteria    |
| fig 6666666.28482.peg.4469 | Contig_55 | 52662 | 51640 | - | Probable acyl-CoA dehydrogenase FadE28 (EC 1.3.99.-); Acyl-CoA dehydrogenase IgrB | FIG00145528 | icw(4);CBSS-164757.7.peg.5020<br>icw(4);Cholesterol_catabolic_operon_in_Mycobacteria |
| fig 6666666.28482.peg.4470 | Contig_55 | 53918 | 52665 | - | Putative cytochrome P450 125 (EC 1.14.-.-); Putative cytochrome P450 IgrA         | FIG00146831 | icw(7);CBSS-164757.7.peg.5020<br>icw(3);Cholesterol_catabolic_operon_in_Mycobacteria |
| fig 6666666.28482.peg.4471 | Contig_55 | 54113 | 55276 | + | Probable acetyl-CoA acetyltransferase FadA5 (EC 2.3.1.9)                          | FIG00142837 | icw(6);CBSS-164757.7.peg.5020                                                        |
| fig 6666666.28482.peg.4472 | Contig_55 | 55276 | 55650 | + | CysQ, putative                                                                    | FIG00109461 | icw(9);CBSS-164757.7.peg.5020                                                        |
| fig 6666666.28482.peg.4473 | Contig_55 | 55673 | 56128 | + | Putative uncharacterized protein BCG_3611                                         | FIG00022045 | icw(2);CBSS-164757.7.peg.5020                                                        |

|                            |           |       |       |   |                                                                                          |             |                               |
|----------------------------|-----------|-------|-------|---|------------------------------------------------------------------------------------------|-------------|-------------------------------|
| fig 6666666.28482.peg.4474 | Contig_55 | 57184 | 56279 | - | Putative uncharacterized protein (Hypothetical short-chain type dehydrogenase/reductase) | FIG00146907 | isu;CBSS-164757.7.peg.5020    |
| fig 6666666.28482.peg.4475 | Contig_55 | 58006 | 57209 | - | Probable short-chain type dehydrogenase/reductase (EC 1.-.-.)                            | FIG00026991 | icw(4);CBSS-164757.7.peg.5020 |
| fig 6666666.28482.peg.4476 | Contig_55 | 58066 | 58824 | + | Probable enoyl-CoA hydratase EchA20 (EC 4.2.1.17)                                        | FIG00145538 | icw(3);CBSS-164757.7.peg.5020 |
| fig 6666666.28482.peg.4477 | Contig_55 | 58821 | 59705 | + | Putative CoA-transferase subunit alpha Rv3551/MT3655 (EC 2.8.3.-)                        | FIG00065948 | icw(5);CBSS-164757.7.peg.5020 |
| fig 6666666.28482.peg.4478 | Contig_55 | 59702 | 60442 | + | Putative CoA-transferase subunit beta Rv3552/MT3656 (EC 2.8.3.-)                         | FIG00145596 | icw(2);CBSS-164757.7.peg.5020 |
| fig 6666666.28482.peg.4479 | Contig_55 | 60442 | 61527 | + | 2-nitropropane dioxygenase (EC 1.13.11.32)                                               | FIG01304356 | icw(6);CBSS-164757.7.peg.5020 |
| fig 6666666.28482.peg.4480 | Contig_55 | 61572 | 61991 | + | FIG00822806: hypothetical protein                                                        | FIG00822805 | ff                            |
| fig 6666666.28482.peg.4481 | Contig_55 | 62051 | 62698 | + | Putative uncharacterized protein                                                         | FIG01341280 | ff                            |
| fig 6666666.28482.peg.4482 | Contig_55 | 62695 | 63435 | + | FIG00824227: hypothetical protein                                                        | FIG00824226 | ff                            |
| fig 6666666.28482.peg.4483 | Contig_55 | 63455 | 63931 | + | Transcriptional regulator, AraC family                                                   | FIG00510130 | ff                            |

|                            |           |       |       |   |                                                                                                                                                                     |             |                                                                                                                                                            |
|----------------------------|-----------|-------|-------|---|---------------------------------------------------------------------------------------------------------------------------------------------------------------------|-------------|------------------------------------------------------------------------------------------------------------------------------------------------------------|
| fig 6666666.28482.peg.4484 | Contig_55 | 63924 | 64355 | + | putative lyase                                                                                                                                                      | FIG00999432 | ff                                                                                                                                                         |
| fig 6666666.28482.peg.4485 | Contig_55 | 65540 | 64380 | - | Probable acetyl-CoA<br>acetyltransferase FadA6<br>(EC 2.3.1.9)                                                                                                      | FIG00145469 | icw(5);CBSS-164757.7.peg.5020                                                                                                                              |
| fig 6666666.28482.peg.4486 | Contig_55 | 66189 | 65596 | - | Transcriptional factor in<br>putative operon for<br>degradation of branched-<br>chain alkanes,<br>nitroalkanes and may be<br>also cyclic ketones,<br>alkenoic acids | FIG00020572 | isu;CBSS-164757.7.peg.5020                                                                                                                                 |
| fig 6666666.28482.peg.4487 | Contig_55 | 66729 | 68384 | + | PPE family protein                                                                                                                                                  | FIG00013075 | icw(3);CBSS-164757.7.peg.5020                                                                                                                              |
| fig 6666666.28482.peg.4488 | Contig_55 | 68522 | 68358 | - | hypothetical protein                                                                                                                                                |             |                                                                                                                                                            |
| fig 6666666.28482.peg.4489 | Contig_55 | 68859 | 70532 | + | PPE family protein                                                                                                                                                  | FIG00013075 | icw(3);CBSS-164757.7.peg.5020                                                                                                                              |
| fig 6666666.28482.peg.4490 | Contig_55 | 71330 | 70542 | - | Short-chain<br>dehydrogenase/reductas<br>e SDR                                                                                                                      | FIG00546160 | idu(13);CBSS-164757.7.peg.5020<br>idu(13);Transcription_repair_cluster                                                                                     |
| fig 6666666.28482.peg.4491 | Contig_55 | 72487 | 71327 | - | FadE30                                                                                                                                                              | FIG00457540 | icw(3);CBSS-164757.7.peg.5020                                                                                                                              |
| fig 6666666.28482.peg.4492 | Contig_55 | 72535 | 74091 | + | Long-chain-fatty-acid--<br>CoA ligase (EC 6.2.1.3)                                                                                                                  | FIG00018699 | idu(72);n-<br>Phenylalkanoic_acid_degradation<br>idu(72);Fatty_acid_metabolism_clust<br>er idu(72);Biotin_synthesis_cluster<br>idu(72);Biotin_biosynthesis |
| fig 6666666.28482.peg.4493 | Contig_55 | 74093 | 75226 | + | Acyl-CoA dehydrogenase,<br>short-chain specific (EC<br>1.3.99.2)                                                                                                    | FIG00009849 | icw(1);Isoleucine_degradation                                                                                                                              |

|                            |           |       |       |   |                                                             |             |                                                                                                                                                                                                                            |
|----------------------------|-----------|-------|-------|---|-------------------------------------------------------------|-------------|----------------------------------------------------------------------------------------------------------------------------------------------------------------------------------------------------------------------------|
| fig 6666666.28482.peg.4494 | Contig_55 | 75226 | 76170 | + | Butyryl-CoA dehydrogenase (EC 1.3.99.2)                     | FIG00009149 | idu(39);Isoleucine_degradation<br>idu(39);Lysine_fermentation<br>idu(39);Butanol_Biosynthesis<br>idu(39);Acetyl-CoA_fermentation_to_Butyrate<br>idu(39);Valine_degradation<br>idu(39);Anaerobic_respiratory_reduc<br>tases |
| fig 6666666.28482.peg.4495 | Contig_55 | 76167 | 77120 | + | Acyl-CoA dehydrogenase FadE33                               | FIG01289712 | ff                                                                                                                                                                                                                         |
| fig 6666666.28482.peg.4496 | Contig_55 | 77117 | 78286 | + | Valine--pyruvate aminotransferase (EC 2.6.1.66)             | FIG00132736 | isu;Branched-Chain_Amino_Acid_Biosynthesis<br>isu;Pyruvate_Alanine_Serine_Interco<br>nversions isu;Alanine_biosynthesis                                                                                                    |
| fig 6666666.28482.peg.4497 | Contig_55 | 80051 | 78276 | - | Long-chain-fatty-acid--CoA ligase (EC 6.2.1.3)              | FIG00018699 | idu(72);n-Phenylalkanoic_acid_degradation<br>idu(72);Fatty_acid_metabolism_clust<br>er idu(72);Biotin_synthesis_cluster<br>idu(72);Biotin_biosynthesis                                                                     |
| fig 6666666.28482.peg.4498 | Contig_55 | 81065 | 80241 | - | Arylamine N-acetyltransferase (EC 2.3.1.5)                  | FIG01382398 | ff                                                                                                                                                                                                                         |
| fig 6666666.28482.peg.4499 | Contig_55 | 81250 | 84330 | + | Probable serine/threonine-protein kinase pknK (EC 2.7.11.1) | FIG00761809 | ff                                                                                                                                                                                                                         |
| fig 6666666.28482.peg.4500 | Contig_55 | 84444 | 84872 | + | hypothetical protein                                        | FIG00638284 | ff                                                                                                                                                                                                                         |
| fig 6666666.28482.peg.4501 | Contig_55 | 85742 | 84936 | - | hypothetical protein                                        |             |                                                                                                                                                                                                                            |

|                            |           |       |       |   |                                                                  |             |                                                                                                                                             |
|----------------------------|-----------|-------|-------|---|------------------------------------------------------------------|-------------|---------------------------------------------------------------------------------------------------------------------------------------------|
| fig 6666666.28482.peg.4502 | Contig_55 | 86388 | 85825 | - | Nitrilotriacetate monooxygenase component B (EC 1.14.13.-)       | FIG00039067 | idu(1);Aromatic_Amin_Catabolism                                                                                                             |
| fig 6666666.28482.peg.4503 | Contig_55 | 87303 | 86401 | - | 2,3-dihydroxybiphenyl 1,2-dioxygenase                            | FIG00004009 | ff                                                                                                                                          |
| fig 6666666.28482.peg.4504 | Contig_55 | 88178 | 87300 | - | 2-hydroxy-6-oxo-6-phenylhexa-2,4-dienoate hydrolase (EC 3.7.1.-) | FIG00003780 | idu(2);carbazol_degradation_cluster<br>idu(2);Central_meta-cleavage_pathway_of_aromatic_compound_degradation<br>idu(2);Biphenyl_Degradation |
| fig 6666666.28482.peg.4505 | Contig_55 | 89362 | 88178 | - | POSSIBLE OXIDOREDUCTASE                                          | FIG00820017 | ff                                                                                                                                          |
| fig 6666666.28482.peg.4506 | Contig_55 | 89511 | 90593 | + | Phenylacetate-CoA oxygenase/reductase, PaaK subunit              | FIG00019269 | ff                                                                                                                                          |
| fig 6666666.28482.peg.4507 | Contig_55 | 90622 | 91155 | + | FIG00821138: hypothetical protein                                | FIG00821137 | ff                                                                                                                                          |
| fig 6666666.28482.peg.4508 | Contig_55 | 92101 | 91214 | - | FIG00821247: hypothetical protein                                | FIG00821246 | ff                                                                                                                                          |
| fig 6666666.28482.peg.4509 | Contig_55 | 94311 | 92188 | - | Acyl-CoA dehydrogenase (EC 1.3.99.-)                             | FIG00820935 | ff                                                                                                                                          |
| fig 6666666.28482.peg.4510 | Contig_55 | 94528 | 95190 | + | Transcriptional regulator kstR (Rv3574), TetR family             | FIG00995019 | ff                                                                                                                                          |
| fig 6666666.28482.peg.4511 | Contig_55 | 96227 | 95187 | - | Transcriptional regulator, LacI family                           | FIG00781023 | ff                                                                                                                                          |
| fig 6666666.28482.peg.4512 | Contig_55 | 96384 | 97286 | + | Zinc ABC transporter, periplasmic-binding protein ZnuA           | FIG00021555 | ff                                                                                                                                          |

|                            |           |        |        |   |                                                                 |             |                                                                                                |
|----------------------------|-----------|--------|--------|---|-----------------------------------------------------------------|-------------|------------------------------------------------------------------------------------------------|
| fig 6666666.28482.peg.4513 | Contig_55 | 97295  | 98119  | + | Zinc ABC transporter, ATP-binding protein ZnuC                  | FIG00059280 | ff                                                                                             |
| fig 6666666.28482.peg.4514 | Contig_55 | 98107  | 98976  | + | Zinc ABC transporter, inner membrane permease protein ZnuB      | FIG00005113 | ff                                                                                             |
| fig 6666666.28482.peg.4515 | Contig_55 | 98998  | 99756  | + | Lactam utilization protein LamB                                 | FIG00003076 | isu;Urea_carboxylase_and_Allophanate_hydrolase_cluster isu;EC699-706                           |
| fig 6666666.28482.peg.4516 | Contig_55 | 99756  | 100676 | + | Zn-dependent hydrolases of the beta-lactamase fold              | FIG00822592 | ff                                                                                             |
| fig 6666666.28482.peg.4517 | Contig_55 | 100690 | 101931 | + | Arsenic efflux pump protein                                     | FIG00081580 | isu;Arsenic_resistance                                                                         |
| fig 6666666.28482.peg.4518 | Contig_55 | 102254 | 101943 | - | hypothetical protein                                            |             |                                                                                                |
| fig 6666666.28482.peg.4519 | Contig_55 | 104979 | 102367 | - | hypothetical protein                                            | FIG00638284 | ff                                                                                             |
| fig 6666666.28482.peg.4520 | Contig_55 | 105192 | 106568 | + | FIG00826217: hypothetical protein                               | FIG00826215 | ff                                                                                             |
| fig 6666666.28482.peg.4521 | Contig_55 | 106600 | 109755 | + | Adenylate cyclase (EC 4.6.1.1)                                  | FIG00001294 | idu(25);cAMP_signaling_in_bacteria                                                             |
| fig 6666666.28482.peg.4522 | Contig_55 | 110720 | 109761 | - | Glycerophosphoryl diester phosphodiesterase (EC 3.1.4.46)       | FIG00002239 | idu(1);Glycerol_and_Glycerol-3-phosphate_Uptake_and_Utilization idu(1);CBSS-176299.4.peg.1996A |
| fig 6666666.28482.peg.4523 | Contig_55 | 111745 | 110816 | - | 23S rRNA (guanosine-2'-O-) -methyltransferase rlmB (EC 2.1.1.-) | FIG00001049 | isu;RNA_methylation                                                                            |
| fig 6666666.28482.peg.4524 | Contig_55 | 113152 | 111746 | - | CysteinyI-tRNA synthetase (EC 6.1.1.16)                         | FIG00000086 | isu;tRNA_aminoacylation,_Cys isu;Conserved_gene_cluster_possibly_involved_in_RNA_metabolism    |

|                            |           |        |        |   |                                                                      |             |                                                                                                                                                                                        |
|----------------------------|-----------|--------|--------|---|----------------------------------------------------------------------|-------------|----------------------------------------------------------------------------------------------------------------------------------------------------------------------------------------|
| fig 6666666.28482.peg.4525 | Contig_55 | 113693 | 113202 | - | 2-C-methyl-D-erythritol 2,4-cyclodiphosphate synthase (EC 4.6.1.12)  | FIG00084105 | isu;Nonmevalonate_Branch_of_Isoprenoid_Biosynthesis<br>isu;Isoprenoid_Biosynthesis<br>isu;Stationary_phase_repair_cluster                                                              |
| fig 6666666.28482.peg.4526 | Contig_55 | 114376 | 113690 | - | 2-C-methyl-D-erythritol 4-phosphate cytidyltransferase (EC 2.7.7.60) | FIG00074225 | icw(1);Nonmevalonate_Branch_of_Isoprenoid_Biosynthesis<br>icw(1);Isoprenoid_Biosynthesis<br>isu;Teichoic_and_lipoteichoic_acids_biosynthesis<br>icw(1);Stationary_phase_repair_cluster |
| fig 6666666.28482.peg.4527 | Contig_55 | 114881 | 114393 | - | CarD-like transcriptional regulator                                  | FIG00648631 | ff                                                                                                                                                                                     |
| fig 6666666.28482.peg.4528 | Contig_55 | 115172 | 115690 | + | Lipoprotein LpqE                                                     | FIG01039405 | ff                                                                                                                                                                                     |
| fig 6666666.28482.peg.4529 | Contig_55 | 115741 | 117168 | + | DNA repair protein RadA                                              | FIG00000283 | isu;Proteolysis_in_bacteria,_ATP-dependent<br>isu;DNA_repair,_bacterial                                                                                                                |
| fig 6666666.28482.peg.4530 | Contig_55 | 117165 | 118238 | + | DNA integrity scanning protein disA                                  | FIG00012395 | ff                                                                                                                                                                                     |
| fig 6666666.28482.peg.4531 | Contig_55 | 119084 | 118245 | - | FIG00820636: hypothetical protein                                    | FIG00820635 | ff                                                                                                                                                                                     |
| fig 6666666.28482.peg.4532 | Contig_55 | 119896 | 119279 | - | Carbonic anhydrase (EC 4.2.1.1)                                      | FIG00023019 | idu(1);Cyanate_hydrolysis                                                                                                                                                              |
| fig 6666666.28482.peg.4533 | Contig_55 | 119895 | 120794 | + | A/G-specific adenine glycosylase (EC 3.2.2.-)                        | FIG00000395 | icw(1);DNA_repair,_bacterial<br>isu;CBSS-176280.1.peg.1561                                                                                                                             |
| fig 6666666.28482.peg.4534 | Contig_55 | 122288 | 120810 | - | Formate hydrogenlyase subunit 5                                      | FIG00139433 | isu;Formate_hydrogenase                                                                                                                                                                |
| fig 6666666.28482.peg.4535 | Contig_55 | 123754 | 122285 | - | Hydrogenase-4 component F (EC 1.-.-.-)                               | FIG00003207 | icw(1);Formate_hydrogenase                                                                                                                                                             |

|                            |           |        |        |   |                                                                         |             |                                                          |
|----------------------------|-----------|--------|--------|---|-------------------------------------------------------------------------|-------------|----------------------------------------------------------|
| fig 6666666.28482.peg.4536 | Contig_55 | 124416 | 123754 | - | Hydrogenase-4 component E (EC 1.-.-.)                                   | FIG00138953 | icw(4);Formate_hydrogenase                               |
| fig 6666666.28482.peg.4537 | Contig_55 | 125372 | 124413 | - | Formate hydrogenlyase subunit 4                                         | FIG00133502 | icw(2);Formate_hydrogenase                               |
| fig 6666666.28482.peg.4538 | Contig_55 | 127345 | 125369 | - | Hydrogenase-4 component B (EC 1.-.-.) / Formate hydrogenlyase subunit 3 | FIG01955952 | icw(3);Formate_hydrogenase<br>icw(4);Formate_hydrogenase |
| fig 6666666.28482.peg.4539 | Contig_55 | 127821 | 127342 | - | Formate hydrogenlyase subunit 11                                        | FIG01307050 | ff                                                       |
| fig 6666666.28482.peg.4540 | Contig_55 | 128160 | 127825 | - | transcriptional regulator, ArsR family                                  |             |                                                          |
| fig 6666666.28482.peg.4541 | Contig_55 | 128429 | 129175 | + | hypothetical protein                                                    |             |                                                          |
| fig 6666666.28482.peg.4542 | Contig_55 | 129168 | 130865 | + | Glucose-methanol-choline (GMC) oxidoreductase:NAD binding site          | FIG00001629 | idu(3);Respiratory_dehydrogenases_1                      |
| fig 6666666.28482.peg.4543 | Contig_55 | 131568 | 130849 | - | PUTATIVE HYDROLASE                                                      | FIG00995931 | ff                                                       |
| fig 6666666.28482.peg.4544 | Contig_55 | 131692 | 132000 | + | Antibiotic biosynthesis monooxygenase                                   | FIG00999654 | idu(1);CBSS-1085.1.peg.1363                              |
| fig 6666666.28482.peg.4545 | Contig_55 | 132032 | 133339 | + | Beta-lactamase (EC 3.5.2.6)                                             | FIG00000747 | idu(1);Beta-lactamase idu(1);Tn552                       |
| fig 6666666.28482.peg.4546 | Contig_55 | 133344 | 134057 | + | hypothetical protein                                                    |             |                                                          |
| fig 6666666.28482.peg.4547 | Contig_55 | 134122 | 134715 | + | bifunctional deaminase-reductase-like protein                           |             |                                                          |

|                            |           |        |        |   |                                                                                                           |             |                                                                          |
|----------------------------|-----------|--------|--------|---|-----------------------------------------------------------------------------------------------------------|-------------|--------------------------------------------------------------------------|
| fig 6666666.28482.peg.4548 | Contig_55 | 135271 | 134720 | - | Probable phosphoglycerate mutase                                                                          | FIG01123304 | ff                                                                       |
| fig 6666666.28482.peg.4549 | Contig_55 | 136059 | 135268 | - | Predicted cobalt transporter CbtA                                                                         | FIG00016867 | isu;Transport_of_Nickel_and_Cobalt<br>isu;Coenzyme_B12_biosynthesis      |
| fig 6666666.28482.peg.4550 | Contig_55 | 136295 | 136080 | - | FIG00823300:<br>hypothetical protein                                                                      | FIG00823295 | ff                                                                       |
| fig 6666666.28482.peg.4551 | Contig_55 | 136813 | 136433 | - | FIG00827377:<br>hypothetical protein                                                                      | FIG00827374 | ff                                                                       |
| fig 6666666.28482.peg.4552 | Contig_55 | 139423 | 136889 | - | ATP-dependent Clp protease, ATP-binding subunit ClpC / Negative regulator of genetic competence clcC/mecB | FIG00011902 | isu;Proteolysis_in_bacteria,_ATP-dependent                               |
| fig 6666666.28482.peg.4553 | Contig_55 | 139466 | 139750 | + | hypothetical protein                                                                                      |             |                                                                          |
| fig 6666666.28482.peg.4554 | Contig_55 | 140048 | 139722 | - | Histone protein Lsr2                                                                                      | FIG00448295 | ff                                                                       |
| fig 6666666.28482.peg.4555 | Contig_55 | 141670 | 140174 | - | Lysyl-tRNA synthetase (class II) (EC 6.1.1.6)                                                             | FIG00000300 | isu;tRNA_aminoacylation,_Lys                                             |
| fig 6666666.28482.peg.4556 | Contig_55 | 142663 | 141848 | - | Pantothenate kinase type III, CoaX-like (EC 2.7.1.33)                                                     | FIG00000695 | icw(1);Coenzyme_A_Biosynthesis_cluster<br>isu;Coenzyme_A_Biosynthesis    |
| fig 6666666.28482.peg.4557 | Contig_55 | 143085 | 142666 | - | Aspartate 1-decarboxylase (EC 4.1.1.11)                                                                   | FIG00008304 | icw(3);Coenzyme_A_Biosynthesis_cluster<br>icw(1);Coenzyme_A_Biosynthesis |
| fig 6666666.28482.peg.4558 | Contig_55 | 144014 | 143085 | - | Pantoate--beta-alanine ligase (EC 6.3.2.1)                                                                | FIG00000440 | isu;Coenzyme_A_Biosynthesis_cluster<br>icw(2);Coenzyme_A_Biosynthesis    |

|                            |           |        |        |   |                                                                                  |             |                                                                                          |
|----------------------------|-----------|--------|--------|---|----------------------------------------------------------------------------------|-------------|------------------------------------------------------------------------------------------|
| fig 6666666.28482.peg.4559 | Contig_55 | 144922 | 144011 | - | FIG173306: hypothetical protein                                                  | FIG00506717 | icw(2);Coenzyme_A_Biosynthesis_cluster icw(3);Coenzyme_A_Biosynthesis                    |
| fig 6666666.28482.peg.4560 | Contig_55 | 146284 | 145037 | - | Possible membrane protein                                                        | FIG00819990 | ff                                                                                       |
| fig 6666666.28482.peg.4561 | Contig_55 | 146849 | 146373 | - | FIG027937: secreted protein                                                      | FIG00996926 | ff                                                                                       |
| fig 6666666.28482.peg.4562 | Contig_55 | 147379 | 146849 | - | 2-amino-4-hydroxy-6-hydroxymethyldihydropteridine pyrophosphokinase (EC 2.7.6.3) | FIG00000171 | icw(2);Folate_Biosynthesis                                                               |
| fig 6666666.28482.peg.4563 | Contig_55 | 147789 | 147388 | - | Dihydroneopterin aldolase (EC 4.1.2.25)                                          | FIG00000373 | icw(3);Folate_Biosynthesis                                                               |
| fig 6666666.28482.peg.4564 | Contig_55 | 148591 | 147782 | - | Dihydropteroate synthase (EC 2.5.1.15)                                           | FIG00000307 | isu;Folate_Biosynthesis                                                                  |
| fig 6666666.28482.peg.4565 | Contig_55 | 149235 | 148603 | - | GTP cyclohydrolase I (EC 3.5.4.16) type 1                                        | FIG00000226 | icw(1);Folate_Biosynthesis<br>isu;Molybdenum_cofactor_biosynthesis                       |
| fig 6666666.28482.peg.4566 | Contig_55 | 151612 | 149252 | - | Cell division protein FtsH (EC 3.4.24.-)                                         | FIG00018369 | idu(1);Bacterial_Cell_Division<br>idu(1);Cell_division-ribosomal_stress_proteins_cluster |
| fig 6666666.28482.peg.4567 | Contig_55 | 152182 | 151847 | - | dioxygenase                                                                      | FIG00825631 | ff                                                                                       |
| fig 6666666.28482.peg.4568 | Contig_55 | 152366 | 153292 | + | Epoxide hydrolase (EC 3.3.2.9)                                                   | FIG00009455 | idu(3);CBSS-410289.13.peg.3174                                                           |
| fig 6666666.28482.peg.4569 | Contig_55 | 153292 | 154482 | + | Limonene 1,2-monooxygenase                                                       | FIG01372910 | ff                                                                                       |
| fig 6666666.28482.peg.4570 | Contig_55 | 154482 | 155495 | + | Sorbitol dehydrogenase (EC 1.1.1.14)                                             | FIG00453259 | ff                                                                                       |

|                            |           |        |        |   |                                                               |             |                                                                                   |
|----------------------------|-----------|--------|--------|---|---------------------------------------------------------------|-------------|-----------------------------------------------------------------------------------|
| fig 6666666.28482.peg.4571 | Contig_55 | 155831 | 155547 | - | ESAT-6-like protein EsxL                                      | FIG00820465 | ff                                                                                |
| fig 6666666.28482.peg.4572 | Contig_55 | 156157 | 155861 | - | FIG00824639:<br>hypothetical protein                          | FIG00823510 | ff                                                                                |
| fig 6666666.28482.peg.4573 | Contig_55 | 157354 | 156236 | - | PPE family protein                                            | FIG00013075 | icw(1);CBSS-164757.7.peg.5020                                                     |
| fig 6666666.28482.peg.4574 | Contig_55 | 158181 | 157384 | - | PE family protein                                             |             |                                                                                   |
| fig 6666666.28482.peg.4575 | Contig_55 | 158364 | 158732 | + | hypothetical protein                                          |             |                                                                                   |
| fig 6666666.28482.peg.4576 | Contig_55 | 158806 | 159096 | + | FIG00825031:<br>hypothetical protein                          | FIG00825029 | ff                                                                                |
| fig 6666666.28482.peg.4577 | Contig_55 | 159609 | 159112 | - | PPE family protein                                            | FIG00013075 | icw(1);CBSS-164757.7.peg.5020                                                     |
| fig 6666666.28482.peg.4578 | Contig_56 | 1954   | 203    | - | DNA repair protein RecN                                       | FIG00000317 | isu;DNA-replication<br>isu;DNA_repair,_bacterial<br>icw(2);CBSS-446462.5.peg.2987 |
| fig 6666666.28482.peg.4579 | Contig_56 | 2882   | 1962   | - | NAD kinase (EC 2.7.1.23)                                      | FIG00000075 | isu;NAD_and_NADP_cofactor_biosyn<br>thesis_global isu;CBSS-<br>446462.5.peg.2987  |
| fig 6666666.28482.peg.4580 | Contig_56 | 3688   | 2879   | - | RNA binding<br>methyltransferase FtsJ<br>like                 | FIG00001125 | icw(1);CBSS-446462.5.peg.2987                                                     |
| fig 6666666.28482.peg.4581 | Contig_56 | 3882   | 3697   | - | FIG00820006:<br>hypothetical protein                          | FIG00820005 | ff                                                                                |
| fig 6666666.28482.peg.4582 | Contig_56 | 4893   | 3895   | - | 4-<br>nitrophenylphosphatase<br>(EC 3.1.3.41)                 | FIG00672032 | ff                                                                                |
| fig 6666666.28482.peg.4583 | Contig_56 | 5530   | 4895   | - | TPR-repeat-containing<br>protein                              | FIG01336235 | ff                                                                                |
| fig 6666666.28482.peg.4584 | Contig_56 | 6161   | 5802   | - | Lipoprotein LprJ                                              | FIG01330511 | ff                                                                                |
| fig 6666666.28482.peg.4585 | Contig_56 | 7479   | 6205   | - | Tyrosyl-tRNA synthetase<br>(EC 6.1.1.1)                       | FIG00346039 | isu;tRNA_aminoacylation,_Tyr                                                      |
| fig 6666666.28482.peg.4586 | Contig_56 | 7608   | 8483   | + | transporter, bile<br>acid/Na <sup>+</sup> symporter<br>family |             |                                                                                   |

|                            |           |       |       |   |                                                              |             |                                                    |
|----------------------------|-----------|-------|-------|---|--------------------------------------------------------------|-------------|----------------------------------------------------|
| fig 6666666.28482.peg.4587 | Contig_56 | 9070  | 8480  | - | DNA-3-methyladenine glycosylase II (EC 3.2.2.21)             | FIG00001134 | isu;DNA_Repair_Base_Excision                       |
| fig 6666666.28482.peg.4588 | Contig_56 | 9160  | 10422 | + | Ammonium transporter                                         | FIG00004764 | idu(2);Ammonia_assimilation                        |
| fig 6666666.28482.peg.4589 | Contig_56 | 11297 | 10431 | - | Cyclopropane-fatty-acyl-phospholipid synthase (EC 2.1.1.79)  | FIG00001555 | ff                                                 |
| fig 6666666.28482.peg.4590 | Contig_56 | 12110 | 11379 | - | dienelactone hydrolase                                       | FIG00814168 | ff                                                 |
| fig 6666666.28482.peg.4591 | Contig_56 | 14444 | 12180 | - | hypothetical protein                                         | FIG00638284 | ff                                                 |
| fig 6666666.28482.peg.4592 | Contig_56 | 14697 | 15461 | + | ABC transporter ATP-binding protein                          | FIG01956052 | ff                                                 |
| fig 6666666.28482.peg.4593 | Contig_56 | 15545 | 16213 | + | "ABC drug efflux pump, inner membrane subunit, DrrB family"  | FIG01121530 | ff                                                 |
| fig 6666666.28482.peg.4594 | Contig_56 | 16215 | 16838 | + | Transcriptional regulator, TetR family                       | FIG00554417 | ff                                                 |
| fig 6666666.28482.peg.4595 | Contig_56 | 17019 | 16804 | - | FIG002473: Protein YcaR in KDO2-Lipid A biosynthesis cluster |             | isu;Broadly_distributed_proteins_not_in_subsystems |
| fig 6666666.28482.peg.4596 | Contig_56 | 19988 | 17019 | - | Polyhydroxyalkanoic acid synthase                            | FIG00000970 | idu(1);Polyhydroxybutyrate_metabolism              |
| fig 6666666.28482.peg.4597 | Contig_56 | 20478 | 20104 | - | hypothetical protein                                         |             |                                                    |
| fig 6666666.28482.peg.4598 | Contig_56 | 20964 | 21446 | + | FIG00823740: hypothetical protein                            | FIG00823739 | ff                                                 |
| fig 6666666.28482.peg.4599 | Contig_56 | 21472 | 22215 | + | FIG00455834: hypothetical protein                            | FIG00455833 | ff                                                 |

|                            |           |       |       |   |                                                                                         |             |                                                                                                                                              |
|----------------------------|-----------|-------|-------|---|-----------------------------------------------------------------------------------------|-------------|----------------------------------------------------------------------------------------------------------------------------------------------|
| fig 6666666.28482.peg.4600 | Contig_56 | 22215 | 23924 | + | Glucose-methanol-<br>choline (GMC)<br>oxidoreductase:NAD<br>binding site                | FIG00001629 | idu(3);Respiratory_dehydrogenases_<br>1                                                                                                      |
| fig 6666666.28482.peg.4601 | Contig_56 | 23917 | 25707 | + | FIG00830353:<br>hypothetical protein                                                    | FIG00830350 | ff                                                                                                                                           |
| fig 6666666.28482.peg.4602 | Contig_56 | 25727 | 26737 | + | FIG00825543:<br>hypothetical protein                                                    | FIG00825540 | ff                                                                                                                                           |
| fig 6666666.28482.peg.4603 | Contig_56 | 26734 | 27186 | + | hypothetical protein                                                                    |             |                                                                                                                                              |
| fig 6666666.28482.peg.4604 | Contig_56 | 27196 | 28299 | + | FIG00823456:<br>hypothetical protein                                                    | FIG00823455 | ff                                                                                                                                           |
| fig 6666666.28482.peg.4605 | Contig_56 | 28393 | 29103 | + | FIG00831850:<br>hypothetical protein                                                    | FIG00831847 | ff                                                                                                                                           |
| fig 6666666.28482.peg.4606 | Contig_56 | 29165 | 30883 | + | PROBABLE FIRST PART OF<br>MACROLIDE-TRANSPORT<br>ATP-BINDING PROTEIN<br>ABC TRANSPORTER |             |                                                                                                                                              |
| fig 6666666.28482.peg.4607 | Contig_56 | 30891 | 32198 | + | Cytochrome P450 139                                                                     | FIG01346688 | ff                                                                                                                                           |
| fig 6666666.28482.peg.4608 | Contig_57 | 91    | 1857  | + | hypothetical protein                                                                    | FIG00638284 | ff                                                                                                                                           |
| fig 6666666.28482.peg.4609 | Contig_57 | 4447  | 1880  | - | hypothetical protein                                                                    | FIG00638284 | ff                                                                                                                                           |
| fig 6666666.28482.peg.4610 | Contig_57 | 4677  | 6635  | + | PE-PGRS FAMILY<br>PROTEIN                                                               |             |                                                                                                                                              |
| fig 6666666.28482.peg.4611 | Contig_57 | 7684  | 6671  | - | Alcohol dehydrogenase<br>(EC 1.1.1.1)                                                   | FIG01007502 | idu(17);Glycerolipid_and_Glyceropho<br>spholipid_Metabolism_in_Bacteria<br>idu(17);Fermentations:_Mixed_acid<br>idu(17);Butanol_Biosynthesis |
| fig 6666666.28482.peg.4612 | Contig_57 | 7803  | 8237  | + | hypothetical protein                                                                    |             |                                                                                                                                              |
| fig 6666666.28482.peg.4613 | Contig_57 | 8234  | 9052  | + | hypothetical protein                                                                    |             |                                                                                                                                              |
| fig 6666666.28482.peg.4614 | Contig_57 | 9201  | 9464  | + | hypothetical protein                                                                    |             |                                                                                                                                              |

|                            |           |       |       |   |                                                                     |             |                                                                                                                                                     |
|----------------------------|-----------|-------|-------|---|---------------------------------------------------------------------|-------------|-----------------------------------------------------------------------------------------------------------------------------------------------------|
| fig 6666666.28482.peg.4615 | Contig_57 | 9489  | 10361 | + | D-alanyl-D-alanine<br>carboxypeptidase (EC<br>3.4.16.4)             | FIG00561498 | idu(3);Murein_Hydrolases<br>idu(3);CBSS-84588.1.peg.1247<br>idu(3);Metallocoarboxypeptidases_(EC<br>_3.4.17.-)<br>idu(3);Peptidoglycan_Biosynthesis |
| fig 6666666.28482.peg.4616 | Contig_57 | 10981 | 10379 | - | Transcriptional regulator,<br>TetR family                           | FIG00554417 | ff                                                                                                                                                  |
| fig 6666666.28482.peg.4617 | Contig_57 | 12776 | 10983 | - | N-acyl-D-glutamate<br>amidohydrolase                                | FIG00820355 | ff                                                                                                                                                  |
| fig 6666666.28482.peg.4618 | Contig_57 | 14423 | 12882 | - | hypothetical protein                                                | FIG00638284 | ff                                                                                                                                                  |
| fig 6666666.28482.peg.4619 | Contig_57 | 15543 | 14461 | - | Aminopeptidase YpdF<br>(MP-, MA-, MS-, AP-, NP-<br>specific)        | FIG00135469 | idu(1);Protein_degradation                                                                                                                          |
| fig 6666666.28482.peg.4620 | Contig_57 | 17107 | 15551 | - | Signal recognition<br>particle, subunit Ffh<br>SRP54 (TC 3.A.5.1.1) | FIG00000113 | isu;Bacterial_signal_recognition_parti<br>cle_(SRP)                                                                                                 |
| fig 6666666.28482.peg.4621 | Contig_57 | 17120 | 17992 | + | FIG00825520:<br>hypothetical protein                                | FIG00825518 | ff                                                                                                                                                  |
| fig 6666666.28482.peg.4622 | Contig_57 | 18186 | 19883 | + | DNA or RNA helicase of<br>superfamily protein II                    | FIG00821286 | ff                                                                                                                                                  |
| fig 6666666.28482.peg.4623 | Contig_58 | 295   | 1296  | + | NAD binding<br>oxidoreductase                                       | FIG01609121 | ff                                                                                                                                                  |
| fig 6666666.28482.peg.4624 | Contig_58 | 2096  | 1302  | - | putative hydrolase                                                  |             |                                                                                                                                                     |
| fig 6666666.28482.peg.4625 | Contig_58 | 2304  | 3686  | + | UDP-glucose 6-<br>dehydrogenase(<br>EC:1.1.1.22 )                   |             |                                                                                                                                                     |
| fig 6666666.28482.peg.4626 | Contig_58 | 3736  | 4731  | + | dTDP-glucose 4,6-<br>dehydratase (EC 4.2.1.46)                      | FIG00030688 | idu(4);dTDP-rhamnose_synthesis<br>idu(4);Rhamnose_containing_glycans                                                                                |
| fig 6666666.28482.peg.4627 | Contig_58 | 6923  | 4728  | - | O-antigen acetylase                                                 | FIG01370327 | ff                                                                                                                                                  |

|                            |           |       |       |   |                                                                   |             |                                                                                                                                                            |
|----------------------------|-----------|-------|-------|---|-------------------------------------------------------------------|-------------|------------------------------------------------------------------------------------------------------------------------------------------------------------|
| fig 6666666.28482.peg.4628 | Contig_58 | 7080  | 8348  | + | GtfA                                                              | FIG01525338 | ff                                                                                                                                                         |
| fig 6666666.28482.peg.4629 | Contig_58 | 10463 | 8358  | - | O-antigen acetylase                                               | FIG01370327 | ff                                                                                                                                                         |
| fig 6666666.28482.peg.4630 | Contig_58 | 11743 | 10670 | - | NAD-dependent<br>epimerase/dehydratase<br>family protein          | FIG00143216 | ff                                                                                                                                                         |
| fig 6666666.28482.peg.4631 | Contig_58 | 14112 | 11893 | - | O-antigen acetylase                                               | FIG01370327 | ff                                                                                                                                                         |
| fig 6666666.28482.peg.4632 | Contig_58 | 14262 | 15395 | + | MtfA protein                                                      | FIG01419689 | ff                                                                                                                                                         |
| fig 6666666.28482.peg.4633 | Contig_58 | 15414 | 16682 | + | GtfA                                                              | FIG01525338 | ff                                                                                                                                                         |
| fig 6666666.28482.peg.4634 | Contig_58 | 16740 | 17975 | + | glycosyltransferase B                                             |             |                                                                                                                                                            |
| fig 6666666.28482.peg.4635 | Contig_58 | 18073 | 18204 | + | hypothetical protein                                              |             |                                                                                                                                                            |
| fig 6666666.28482.peg.4636 | Contig_58 | 18261 | 29198 | + | Malonyl CoA-acyl carrier<br>protein transacylase (EC<br>2.3.1.39) | FIG00000319 | idu(7);Fatty_Acid_Biosynthesis_FASII                                                                                                                       |
| fig 6666666.28482.peg.4637 | Contig_58 | 29673 | 30263 | + | hypothetical protein                                              |             |                                                                                                                                                            |
| fig 6666666.28482.peg.4638 | Contig_58 | 31084 | 30278 | - | Probable<br>methyltransferase (EC<br>2.1.1.-)                     |             |                                                                                                                                                            |
| fig 6666666.28482.peg.4639 | Contig_58 | 31877 | 32107 | + | MbtH protein                                                      | FIG01223139 | ff                                                                                                                                                         |
| fig 6666666.28482.peg.4640 | Contig_58 | 32113 | 36678 | + | Long-chain-fatty-acid--<br>CoA ligase (EC 6.2.1.3)                | FIG00018699 | idu(72);n-<br>Phenylalkanoic_acid_degradation<br>idu(72);Fatty_acid_metabolism_clust<br>er idu(72);Biotin_synthesis_cluster<br>idu(72);Biotin_biosynthesis |
| fig 6666666.28482.peg.4641 | Contig_58 | 36683 | 49300 | + | Long-chain-fatty-acid--<br>CoA ligase (EC 6.2.1.3)                | FIG00018699 | idu(72);n-<br>Phenylalkanoic_acid_degradation<br>idu(72);Fatty_acid_metabolism_clust<br>er idu(72);Biotin_synthesis_cluster<br>idu(72);Biotin_biosynthesis |

|                            |           |       |       |   |                                                                             |             |                                          |
|----------------------------|-----------|-------|-------|---|-----------------------------------------------------------------------------|-------------|------------------------------------------|
| fig 6666666.28482.peg.4642 | Contig_58 | 49999 | 49325 | - | isoprenylcysteine<br>carboxyl<br>methyltransferase (icmt)<br>family protein |             |                                          |
| fig 6666666.28482.peg.4643 | Contig_58 | 50455 | 50177 | - | hypothetical protein                                                        |             |                                          |
| fig 6666666.28482.peg.4644 | Contig_59 | 4     | 576   | + | PE family protein                                                           |             |                                          |
| fig 6666666.28482.peg.4645 | Contig_59 | 694   | 2568  | + | PE-PGRS family protein                                                      |             | idu(16);PPE_gene_cluster_in_Mycobacteria |
| fig 6666666.28482.peg.4646 | Contig_59 | 2999  | 2580  | - | hypothetical membrane<br>protein                                            |             |                                          |
| fig 6666666.28482.peg.4647 | Contig_59 | 3922  | 2996  | - | FIG00828022:                                                                | FIG00828021 | ff                                       |
|                            |           |       |       |   | hypothetical protein                                                        |             |                                          |
| fig 6666666.28482.peg.4648 | Contig_59 | 4389  | 3919  | - | FIG00826545:                                                                | FIG00826544 | ff                                       |
|                            |           |       |       |   | hypothetical protein                                                        |             |                                          |
| fig 6666666.28482.peg.4649 | Contig_59 | 5100  | 4411  | - | FIG00823447:                                                                | FIG00823443 | ff                                       |
|                            |           |       |       |   | hypothetical protein                                                        |             |                                          |
| fig 6666666.28482.peg.4650 | Contig_59 | 5654  | 5097  | - | RNA polymerase sigma<br>factor                                              | FIG00014368 | ff                                       |
| fig 6666666.28482.peg.4651 | Contig_59 | 7102  | 5672  | - | FIG00825309:                                                                | FIG00825308 | ff                                       |
|                            |           |       |       |   | hypothetical protein                                                        |             |                                          |
| fig 6666666.28482.peg.4652 | Contig_59 | 7707  | 7135  | - | Transcriptional regulator,<br>TetR family                                   | FIG00554417 | ff                                       |
| fig 6666666.28482.peg.4653 | Contig_59 | 7792  | 8670  | + | hypothetical protein                                                        |             |                                          |
| fig 6666666.28482.peg.4654 | Contig_59 | 8748  | 10268 | + | Methylmalonate-<br>semialdehyde<br>dehydrogenase (EC<br>1.2.1.27)           | FIG00137372 | icw(2);Valine_degradation                |

|                            |           |       |       |   |                                                                      |             |                                                                                                                                                                                                                        |
|----------------------------|-----------|-------|-------|---|----------------------------------------------------------------------|-------------|------------------------------------------------------------------------------------------------------------------------------------------------------------------------------------------------------------------------|
| fig 6666666.28482.peg.4655 | Contig_59 | 10278 | 11438 | + | Butyryl-CoA dehydrogenase (EC 1.3.99.2)                              | FIG00009149 | idu(39);Isoleucine_degradation<br>idu(39);Lysine_fermentation<br>idu(39);Butanol_Biosynthesis<br>idu(39);Acetyl-CoA_fermentation_to_Butyrate<br>idu(39);Valine_degradation<br>idu(39);Anaerobic_respiratory_reductions |
| fig 6666666.28482.peg.4656 | Contig_59 | 11451 | 12326 | + | 3-hydroxyisobutyrate dehydrogenase (EC 1.1.1.31)                     | FIG00021583 | icw(1);Valine_degradation                                                                                                                                                                                              |
| fig 6666666.28482.peg.4657 | Contig_59 | 12901 | 12353 | - | FIG00822571: hypothetical protein                                    | FIG00822570 | ff                                                                                                                                                                                                                     |
| fig 6666666.28482.peg.4658 | Contig_59 | 13427 | 12924 | - | Transcriptional regulator, MarR family                               | FIG00554610 | ff                                                                                                                                                                                                                     |
| fig 6666666.28482.peg.4659 | Contig_59 | 14488 | 13436 | - | Biosynthetic Aromatic amino acid aminotransferase beta (EC 2.6.1.57) | FIG00032670 | idu(1);Phenylalanine_and_Tyrosine_Branches_from_Chorismate                                                                                                                                                             |
| fig 6666666.28482.peg.4660 | Contig_59 | 15507 | 14488 | - | 3-oxoacyl-[acyl-carrier-protein] synthase, KASIII (EC 2.3.1.41)      | FIG00015100 | idu(2);Fatty_Acid_Biosynthesis_FASII                                                                                                                                                                                   |
| fig 6666666.28482.peg.4661 | Contig_59 | 16158 | 15511 | - | FIG00820173: hypothetical protein                                    | FIG00820172 | ff                                                                                                                                                                                                                     |
| fig 6666666.28482.peg.4662 | Contig_59 | 17839 | 16136 | - | COG0028: Thiamine pyrophosphate-requiring enzymes                    | FIG00452446 | ff                                                                                                                                                                                                                     |
| fig 6666666.28482.peg.4663 | Contig_59 | 18687 | 17917 | - | Possible membrane protein                                            | FIG01121868 | ff                                                                                                                                                                                                                     |
| fig 6666666.28482.peg.4664 | Contig_59 | 19225 | 18734 | - | RNA polymerase sigma-70 factor                                       | FIG01303902 | idu(4);CBSS-313593.3.peg.2729<br>idu(4);Transcription_initiation,_bacterial_sigma_factors                                                                                                                              |

|                            |           |       |       |   |                                                               |             |                                                                                       |
|----------------------------|-----------|-------|-------|---|---------------------------------------------------------------|-------------|---------------------------------------------------------------------------------------|
| fig 6666666.28482.peg.4665 | Contig_59 | 20128 | 19328 | - | Methionine<br>aminopeptidase (EC<br>3.4.11.18)                | FIG00000036 | idu(1);CBSS-312309.3.peg.1965<br>idu(1);Translation_termination_facto<br>rs_bacterial |
| fig 6666666.28482.peg.4666 | Contig_59 | 20670 | 20131 | - | Adenylate kinase (EC<br>2.7.4.3)                              | FIG00000089 | isu;Purine_conversions                                                                |
| fig 6666666.28482.peg.4667 | Contig_59 | 21998 | 20673 | - | Preprotein translocase<br>secY subunit (TC<br>3.A.5.1.1)      | FIG00937056 | ff                                                                                    |
| fig 6666666.28482.peg.4668 | Contig_59 | 22175 | 23080 | + | O-Methyltransferase<br>involved in polyketide<br>biosynthesis | FIG01313020 | ff                                                                                    |
| fig 6666666.28482.peg.4669 | Contig_59 | 23759 | 23088 | - | FIG00820922:<br>hypothetical protein                          | FIG00820921 | ff                                                                                    |
| fig 6666666.28482.peg.4670 | Contig_59 | 25087 | 23750 | - | Putative xylulose kinase<br>(EC 2.7.1.17)                     | FIG00229240 | isu;Xylose_utilization                                                                |
| fig 6666666.28482.peg.4671 | Contig_59 | 25142 | 26098 | + | D-3-phosphoglycerate<br>dehydrogenase (EC<br>1.1.1.95)        | FIG00031250 | idu(4);Serine_Biosynthesis<br>idu(4);Pyridoxin_(Vitamin_B6)_Biosy<br>nthesis          |
| fig 6666666.28482.peg.4672 | Contig_59 | 26095 | 26748 | + | L-fucose phosphate<br>aldolase (EC 4.1.2.17)                  | FIG00002486 | isu;L-fucose_utilization_temp isu;L-<br>fucose_utilization                            |
| fig 6666666.28482.peg.4673 | Contig_59 | 26749 | 27633 | + | putative beta-lactamase                                       | FIG01548503 | ff                                                                                    |
| fig 6666666.28482.peg.4674 | Contig_59 | 27637 | 28671 | + | hypothetical protein                                          |             |                                                                                       |
| fig 6666666.28482.peg.4675 | Contig_59 | 29517 | 28660 | - | Transcriptional regulator,<br>AraC family                     | FIG00510130 | ff                                                                                    |
| fig 6666666.28482.peg.4676 | Contig_59 | 29583 | 30239 | + | Methyltransferase<br>Sare_0198                                | FIG01598253 | ff                                                                                    |
| fig 6666666.28482.peg.4677 | Contig_59 | 31450 | 30236 | - | Adh                                                           | FIG01491610 | ff                                                                                    |
| fig 6666666.28482.peg.4678 | Contig_59 | 32235 | 31447 | - | short-chain<br>dehydrogenase Adh_1                            | FIG00825109 | ff                                                                                    |
| fig 6666666.28482.peg.4679 | Contig_59 | 32333 | 33277 | + | FIG00824343:<br>hypothetical protein                          | FIG00824342 | ff                                                                                    |

|                            |           |       |       |   |                                                                                       |             |                                     |
|----------------------------|-----------|-------|-------|---|---------------------------------------------------------------------------------------|-------------|-------------------------------------|
| fig 6666666.28482.peg.4680 | Contig_59 | 33318 | 34178 | + | O-Methyltransferase involved in polyketide biosynthesis                               | FIG01313020 | ff                                  |
| fig 6666666.28482.peg.4681 | Contig_59 | 34231 | 35100 | + | FIG00824343: hypothetical protein                                                     | FIG00824342 | ff                                  |
| fig 6666666.28482.peg.4682 | Contig_59 | 36872 | 35097 | - | Possible protease IV SppA (endopeptidase IV) (signal peptide peptidase)               | FIG01320210 | ff                                  |
| fig 6666666.28482.peg.4683 | Contig_59 | 36911 | 37837 | + | Luciferase-like monooxygenase (EC 1.14.-.-)                                           | FIG00554275 | ff                                  |
| fig 6666666.28482.peg.4684 | Contig_59 | 38278 | 37838 | - | LSU ribosomal protein L15p (L27Ae)                                                    | FIG00000166 | icw(6);Ribosome_LSU_bacterial       |
| fig 6666666.28482.peg.4685 | Contig_59 | 38457 | 38275 | - | LSU ribosomal protein L30p (L7e)                                                      | FIG00000409 | icw(5);Ribosome_LSU_bacterial       |
| fig 6666666.28482.peg.4686 | Contig_59 | 39149 | 38454 | - | SSU ribosomal protein S5p (S2e)                                                       | FIG00000155 | isu;Ribosomal_protein_S5p_acylation |
| fig 6666666.28482.peg.4687 | Contig_59 | 39597 | 39190 | - | LSU ribosomal protein L18p (L5e)                                                      | FIG00000200 | isu;Ribosome_LSU_bacterial          |
| fig 6666666.28482.peg.4688 | Contig_59 | 40139 | 39600 | - | LSU ribosomal protein L6p (L9e)                                                       | FIG00001577 | icw(3);Ribosome_LSU_bacterial       |
| fig 6666666.28482.peg.4689 | Contig_59 | 40549 | 40151 | - | SSU ribosomal protein S8p (S15Ae)                                                     | FIG00000153 | ff                                  |
| fig 6666666.28482.peg.4690 | Contig_59 | 40754 | 40569 | - | SSU ribosomal protein S14p (S29e) @ SSU ribosomal protein S14p (S29e), zinc-dependent |             |                                     |
| fig 6666666.28482.peg.4691 | Contig_59 | 41322 | 40759 | - | LSU ribosomal protein L5p (L11e)                                                      | FIG00000174 | icw(1);Ribosome_LSU_bacterial       |
| fig 6666666.28482.peg.4692 | Contig_59 | 41639 | 41322 | - | LSU ribosomal protein L24p (L26e)                                                     | FIG00000198 | icw(4);Ribosome_LSU_bacterial       |

|                            |           |       |       |   |                                                                                      |             |                                                                                                                                                                            |
|----------------------------|-----------|-------|-------|---|--------------------------------------------------------------------------------------|-------------|----------------------------------------------------------------------------------------------------------------------------------------------------------------------------|
| fig 6666666.28482.peg.4693 | Contig_59 | 42008 | 41640 | - | LSU ribosomal protein L14p (L23e)                                                    | FIG00090781 | icw(2);Ribosome_LSU_bacterial                                                                                                                                              |
| fig 6666666.28482.peg.4694 | Contig_59 | 43722 | 42205 | - | 13E12 repeat family protein                                                          | FIG00831556 | ff                                                                                                                                                                         |
| fig 6666666.28482.peg.4695 | Contig_59 | 44848 | 43886 | - | Possible membrane protein                                                            | FIG01121868 | ff                                                                                                                                                                         |
| fig 6666666.28482.peg.4696 | Contig_59 | 45967 | 44966 | - | Possible membrane protein                                                            | FIG01121868 | ff                                                                                                                                                                         |
| fig 6666666.28482.peg.4697 | Contig_59 | 47010 | 46120 | - | Sulfatase modifying factor 1 precursor (C-alpha-formylglycine-generating enzyme 1)   | FIG00003489 | idu(1);Sulfatases_and_sulfatase_modifying_factor_1                                                                                                                         |
| fig 6666666.28482.peg.4698 | Contig_59 | 47985 | 47044 | - | Possible membrane protein                                                            | FIG01121868 | ff                                                                                                                                                                         |
| fig 6666666.28482.peg.4699 | Contig_59 | 48283 | 49410 | + | Phosphate ABC transporter, periplasmic phosphate-binding protein PstS (TC 3.A.1.7.1) | FIG00010508 | idu(4);High_affinity_phosphate_transporter_and_control_of_PHO_regulon<br>idu(4);Phosphate_metabolism<br>idu(4);PhoR-PhoB_two-component_regulatory_system                   |
| fig 6666666.28482.peg.4700 | Contig_59 | 50341 | 49415 | - | hypothetical protein                                                                 |             |                                                                                                                                                                            |
| fig 6666666.28482.peg.4701 | Contig_59 | 52840 | 50480 | - | Arylsulfatase (EC 3.1.6.1)                                                           | FIG00016566 | idu(3);Sulfatases_and_sulfatase_modifying_factor_1<br>idu(3);Galactosylceramide_and_Sulfatide_metabolism<br>idu(3);Steroid_sulfates<br>idu(3);Alkanesulfonate_assimilation |
| fig 6666666.28482.peg.4702 | Contig_59 | 53515 | 52886 | - | membrane protein, putative                                                           |             |                                                                                                                                                                            |
| fig 6666666.28482.peg.4703 | Contig_59 | 53594 | 54301 | + | Transcriptional regulator, TetR family                                               | FIG00554417 | ff                                                                                                                                                                         |

|                            |           |       |       |   |                                           |             |                                                          |
|----------------------------|-----------|-------|-------|---|-------------------------------------------|-------------|----------------------------------------------------------|
| fig 6666666.28482.peg.4704 | Contig_59 | 54670 | 54308 | - | SSU ribosomal protein S17p (S11e)         | FIG00000181 | ff                                                       |
| fig 6666666.28482.peg.4705 | Contig_59 | 54912 | 54667 | - | LSU ribosomal protein L29p (L35e)         | FIG00015729 | icw(2);Ribosome_LSU_bacterial                            |
| fig 6666666.28482.peg.4706 | Contig_59 | 55328 | 54912 | - | LSU ribosomal protein L16p (L10e)         | FIG00001132 | icw(3);Ribosome_LSU_bacterial                            |
| fig 6666666.28482.peg.4707 | Contig_59 | 56168 | 55332 | - | SSU ribosomal protein S3p (S3e)           | FIG00000218 | ff                                                       |
| fig 6666666.28482.peg.4708 | Contig_59 | 56725 | 56168 | - | LSU ribosomal protein L22p (L17e)         | FIG00000219 | icw(5);Ribosome_LSU_bacterial                            |
| fig 6666666.28482.peg.4709 | Contig_59 | 57003 | 56722 | - | SSU ribosomal protein S19p (S15e)         | FIG00000199 | ff                                                       |
| fig 6666666.28482.peg.4710 | Contig_59 | 57861 | 57019 | - | LSU ribosomal protein L2p (L8e)           | FIG00000223 | icw(1);Ribosome_LSU_bacterial                            |
| fig 6666666.28482.peg.4711 | Contig_59 | 58180 | 57878 | - | LSU ribosomal protein L23p (L23Ae)        | FIG00000271 | isu;Ribosome_LSU_bacterial                               |
| fig 6666666.28482.peg.4712 | Contig_59 | 58845 | 58180 | - | LSU ribosomal protein L4p (L1e)           | FIG00000263 | icw(6);Ribosome_LSU_bacterial                            |
| fig 6666666.28482.peg.4713 | Contig_59 | 59519 | 58845 | - | LSU ribosomal protein L3p (L3e)           | FIG00001818 | icw(4);Ribosome_LSU_bacterial                            |
| fig 6666666.28482.peg.4714 | Contig_59 | 59839 | 59534 | - | SSU ribosomal protein S10p (S20e)         | FIG00001107 | ff                                                       |
| fig 6666666.28482.peg.4715 | Contig_59 | 60655 | 60170 | - | Transcriptional regulator, TetR family    | FIG00554417 | ff                                                       |
| fig 6666666.28482.peg.4716 | Contig_59 | 61024 | 62541 | + | Integral membrane protein                 | FIG01956050 | ff                                                       |
| fig 6666666.28482.peg.4717 | Contig_59 | 62667 | 62819 | + | hypothetical protein                      |             |                                                          |
| fig 6666666.28482.peg.4718 | Contig_6  | 47    | 268   | + | Phosphoenolpyruvate synthase (EC 2.7.9.2) | FIG00000789 | idu(2);Pyruvate_metabolism_I:_anaplerotic_reactions,_PEP |
| fig 6666666.28482.peg.4719 | Contig_6  | 1000  | 275   | - | FIG003003: hypothetical protein           | FIG00634249 | ff                                                       |
| fig 6666666.28482.peg.4720 | Contig_6  | 1643  | 1008  | - | FIG00820353: hypothetical protein         | FIG00820351 | ff                                                       |

|                            |          |       |       |   |                                                                              |             |                                                                                                                                                                                                  |
|----------------------------|----------|-------|-------|---|------------------------------------------------------------------------------|-------------|--------------------------------------------------------------------------------------------------------------------------------------------------------------------------------------------------|
| fig 6666666.28482.peg.4721 | Contig_6 | 2019  | 1687  | - | FIG00825063:<br>hypothetical protein                                         | FIG00825062 | ff                                                                                                                                                                                               |
| fig 6666666.28482.peg.4722 | Contig_6 | 2442  | 2131  | - | FIG00820081:<br>hypothetical protein                                         | FIG00820079 | ff                                                                                                                                                                                               |
| fig 6666666.28482.peg.4723 | Contig_6 | 3109  | 2618  | - | hypothetical protein                                                         |             |                                                                                                                                                                                                  |
| fig 6666666.28482.peg.4724 | Contig_6 | 5639  | 3327  | - | ATP-dependent protease<br>La (EC 3.4.21.53) Type I                           | FIG00132617 | isu;Proteolysis_in_bacteria,_ATP-<br>dependent                                                                                                                                                   |
| fig 6666666.28482.peg.4725 | Contig_6 | 6981  | 5755  | - | L-lactate dehydrogenase<br>(EC 1.1.2.3)                                      | FIG00121995 | isu;Respiratory_dehydrogenases_1<br>isu;Lactate_utilization isu;L-<br>rhamnose_utilization                                                                                                       |
| fig 6666666.28482.peg.4726 | Contig_6 | 7016  | 7441  | + | NTP<br>pyrophosphohydrolases<br>including oxidative<br>damage repair enzymes | FIG00004782 | idu(1);CBSS-216591.1.peg.168                                                                                                                                                                     |
| fig 6666666.28482.peg.4727 | Contig_6 | 8713  | 7427  | - | Neopullulanase (EC<br>3.2.1.135)                                             | FIG00066643 | isu;Maltose_and_Maltodextrin_Utiliz<br>ation                                                                                                                                                     |
| fig 6666666.28482.peg.4728 | Contig_6 | 9253  | 8717  | - | Alkylhydroperoxidase<br>protein D                                            | FIG00003720 | icw(1);Thioredoxin-<br>disulfide_reductase                                                                                                                                                       |
| fig 6666666.28482.peg.4729 | Contig_6 | 9851  | 9264  | - | Alkyl hydroperoxide<br>reductase protein C (EC<br>1.6.4.-)                   | FIG00000710 | icw(2);Thioredoxin-<br>disulfide_reductase                                                                                                                                                       |
| fig 6666666.28482.peg.4730 | Contig_6 | 9926  | 10897 | + | Hydrogen peroxide-<br>inducible genes activator                              | FIG00031825 | idu(1);Oxidative_stress idu(1);LysR-<br>family_proteins_in_Salmonella_enter<br>ica_Typhimurium idu(1);LysR-<br>family_proteins_in_Escherichia_coli<br>idu(1);Thioredoxin-<br>disulfide_reductase |
| fig 6666666.28482.peg.4731 | Contig_6 | 10924 | 11625 | + | FIG00820973:<br>hypothetical protein                                         | FIG00820972 | ff                                                                                                                                                                                               |

|                            |          |       |       |   |                                             |             |                                                                                                                                                                                                                                                                                                                           |
|----------------------------|----------|-------|-------|---|---------------------------------------------|-------------|---------------------------------------------------------------------------------------------------------------------------------------------------------------------------------------------------------------------------------------------------------------------------------------------------------------------------|
| fig 6666666.28482.peg.4732 | Contig_6 | 11634 | 12077 | + | Pyridoxine 5'-phosphate oxidase             | FIG01381952 | ff                                                                                                                                                                                                                                                                                                                        |
| fig 6666666.28482.peg.4733 | Contig_6 | 12100 | 12849 | + | Enoyl-CoA hydratase (EC 4.2.1.17)           | FIG00033206 | idu(51);n-Phenylalkanoic_acid_degradation idu(51);Polyhydroxybutyrate_metabolism idu(51);Isoleucine_degradation idu(51);Fatty_acid_metabolism_cluster idu(51);Lysine_fermentation idu(51);Butanol_Biosynthesis idu(51);Acetyl-CoA_fermentation_to_Butyrate idu(51);Valine_degradation idu(51);Butyrate_metabolism_cluster |
| fig 6666666.28482.peg.4734 | Contig_6 | 13033 | 12854 | - | FIG00820183: hypothetical protein           | FIG00820182 | ff                                                                                                                                                                                                                                                                                                                        |
| fig 6666666.28482.peg.4735 | Contig_6 | 13273 | 13752 | + | Bacterioferritin (BFR)                      | FIG01312040 | ff                                                                                                                                                                                                                                                                                                                        |
| fig 6666666.28482.peg.4736 | Contig_6 | 13830 | 15926 | + | Multidrug resistance protein B              | FIG01356213 | ff                                                                                                                                                                                                                                                                                                                        |
| fig 6666666.28482.peg.4737 | Contig_6 | 15923 | 16417 | + | FIG00824327: hypothetical protein           | FIG00824325 | ff                                                                                                                                                                                                                                                                                                                        |
| fig 6666666.28482.peg.4738 | Contig_6 | 16518 | 17399 | + | FIG00828228: hypothetical protein           | FIG00828224 | ff                                                                                                                                                                                                                                                                                                                        |
| fig 6666666.28482.peg.4739 | Contig_6 | 17413 | 18774 | + | Glutamine synthetase (EC 6.3.1.2), putative | FIG01314524 | ff                                                                                                                                                                                                                                                                                                                        |
| fig 6666666.28482.peg.4740 | Contig_6 | 18771 | 19871 | + | Amidohydrolase                              | FIG01311586 | ff                                                                                                                                                                                                                                                                                                                        |
| fig 6666666.28482.peg.4741 | Contig_6 | 19902 | 20735 | + | acyltransferase family protein              | FIG01250595 | ff                                                                                                                                                                                                                                                                                                                        |
| fig 6666666.28482.peg.4742 | Contig_6 | 20735 | 21169 | + | cyclase/dehydrase                           |             |                                                                                                                                                                                                                                                                                                                           |
| fig 6666666.28482.peg.4743 | Contig_6 | 21409 | 21531 | + | hypothetical protein                        |             |                                                                                                                                                                                                                                                                                                                           |

|                            |          |       |       |   |                                                                                   |             |                                                                                                                                              |
|----------------------------|----------|-------|-------|---|-----------------------------------------------------------------------------------|-------------|----------------------------------------------------------------------------------------------------------------------------------------------|
| fig 6666666.28482.peg.4744 | Contig_6 | 22902 | 21562 | - | FIG00995345:<br>hypothetical protein                                              | FIG00995340 | ff                                                                                                                                           |
| fig 6666666.28482.peg.4745 | Contig_6 | 23020 | 24408 | + | PPE family protein                                                                | FIG00013075 | icw(2);CBSS-164757.7.peg.5020                                                                                                                |
| fig 6666666.28482.peg.4746 | Contig_6 | 24405 | 25781 | + | PPE family protein                                                                | FIG00013075 | icw(2);CBSS-164757.7.peg.5020                                                                                                                |
| fig 6666666.28482.peg.4747 | Contig_6 | 26539 | 25778 | - | Ubiquinone/menaquinon<br>e biosynthesis<br>methyltransferase UbiE<br>(EC 2.1.1.-) |             | idu(2);Menaquinone_and_Phyloquin<br>one_Biosynthesis<br>idu(2);Menaquinone_Biosynthesis_vi<br>a_Futalosine<br>idu(2);Ubiquinone_Biosynthesis |
| fig 6666666.28482.peg.4748 | Contig_6 | 26682 | 26885 | + | hypothetical protein                                                              |             |                                                                                                                                              |
| fig 6666666.28482.peg.4749 | Contig_6 | 27127 | 28605 | + | PPE family protein                                                                | FIG00013075 | icw(2);CBSS-164757.7.peg.5020                                                                                                                |
| fig 6666666.28482.peg.4750 | Contig_6 | 29082 | 28624 | - | FIG00823935:<br>hypothetical protein                                              | FIG00823934 | ff                                                                                                                                           |
| fig 6666666.28482.peg.4751 | Contig_6 | 29146 | 30054 | + | Dienelactone hydrolase<br>family                                                  | FIG01069253 | ff                                                                                                                                           |
| fig 6666666.28482.peg.4752 | Contig_6 | 30051 | 30413 | + | hypothetical protein                                                              |             |                                                                                                                                              |
| fig 6666666.28482.peg.4753 | Contig_6 | 30475 | 30657 | + | hypothetical protein                                                              |             |                                                                                                                                              |
| fig 6666666.28482.peg.4754 | Contig_6 | 32042 | 30717 | - | Cytochrome P450 140                                                               | FIG01337186 | ff                                                                                                                                           |
| fig 6666666.28482.peg.4755 | Contig_6 | 32520 | 32101 | - | Lipoprotein LppE                                                                  | FIG01328245 | ff                                                                                                                                           |
| fig 6666666.28482.peg.4756 | Contig_6 | 33367 | 32534 | - | Probable short-chain<br>type<br>dehydrogenase/reductas<br>e (EC 1.1.-.-)          | FIG00831186 | ff                                                                                                                                           |
| fig 6666666.28482.peg.4757 | Contig_6 | 33805 | 33374 | - | FIG00820653:<br>hypothetical protein                                              | FIG00820652 | ff                                                                                                                                           |
| fig 6666666.28482.peg.4758 | Contig_6 | 34298 | 33879 | - | Resuscitation-promoting<br>factor RpfC                                            | FIG01310076 | ff                                                                                                                                           |
| fig 6666666.28482.peg.4759 | Contig_6 | 35014 | 34421 | - | Periplasmic chorismate<br>mutase I precursor (EC<br>5.4.99.5)                     | FIG00132814 | isu;Chorismate_Synthesis<br>isu;Phenylalanine_and_Tyrosine_Bra<br>nches_from_Chorismate                                                      |
| fig 6666666.28482.peg.4760 | Contig_6 | 35060 | 35632 | + | FIG00822912:<br>hypothetical protein                                              | FIG00822909 | ff                                                                                                                                           |

|                            |           |       |       |   |                                                                           |             |                                                                                                                                          |
|----------------------------|-----------|-------|-------|---|---------------------------------------------------------------------------|-------------|------------------------------------------------------------------------------------------------------------------------------------------|
| fig 6666666.28482.peg.4761 | Contig_6  | 36674 | 35694 | - | Esterase, secreted<br>fibronectin-binding<br>protein antigen 85-B<br>FbpB | FIG00820332 | ff                                                                                                                                       |
| fig 6666666.28482.peg.4762 | Contig_6  | 36815 | 36943 | + | hypothetical protein                                                      |             |                                                                                                                                          |
| fig 6666666.28482.peg.4763 | Contig_6  | 37399 | 38526 | + | Possible membrane<br>protein                                              | FIG01121868 | ff                                                                                                                                       |
| fig 6666666.28482.peg.4764 | Contig_6  | 39089 | 38541 | - | FIG00820863:<br>hypothetical protein                                      | FIG00820861 | ff                                                                                                                                       |
| fig 6666666.28482.peg.4765 | Contig_6  | 40116 | 39103 | - | Alcohol dehydrogenase<br>(EC 1.1.1.1)                                     | FIG01007502 | idu(17);Glycerolipid_and_Glycerophospholipid_Metabolism_in_Bacteria<br>idu(17);Fermentations:_Mixed_acid<br>idu(17);Butanol_Biosynthesis |
| fig 6666666.28482.peg.4766 | Contig_60 | 121   | 504   | + | hypothetical protein                                                      |             |                                                                                                                                          |
| fig 6666666.28482.peg.4767 | Contig_60 | 610   | 1551  | + | Alcohol dehydrogenase<br>GroES domain protein                             | FIG00615601 | ff                                                                                                                                       |
| fig 6666666.28482.peg.4768 | Contig_60 | 1626  | 2402  | + | putative short-chain<br>dehydrogenase                                     |             |                                                                                                                                          |
| fig 6666666.28482.peg.4769 | Contig_60 | 2456  | 2971  | + | Transcriptional regulator,<br>MarR family                                 | FIG00554610 | ff                                                                                                                                       |
| fig 6666666.28482.peg.4770 | Contig_60 | 3305  | 3679  | + | FIG00826668:<br>hypothetical protein                                      |             |                                                                                                                                          |
| fig 6666666.28482.peg.4771 | Contig_60 | 3777  | 5996  | + | O-antigen acetylase                                                       | FIG01370327 | ff                                                                                                                                       |
| fig 6666666.28482.peg.4772 | Contig_60 | 6301  | 6011  | - | hypothetical protein                                                      |             |                                                                                                                                          |
| fig 6666666.28482.peg.4773 | Contig_60 | 6705  | 6316  | - | exported protein                                                          |             |                                                                                                                                          |
| fig 6666666.28482.peg.4774 | Contig_60 | 6838  | 7275  | + | hypothetical protein                                                      |             |                                                                                                                                          |
| fig 6666666.28482.peg.4775 | Contig_60 | 7378  | 8316  | + | Phosphate transport<br>system regulatory<br>protein PhoU                  | FIG00104848 | idu(3);High_affinity_phosphate_transporter_and_control_of_PHO_regulon<br>idu(3);Phosphate_metabolism                                     |

|                            |           |       |       |   |                                                                                |                                                                                                                           |
|----------------------------|-----------|-------|-------|---|--------------------------------------------------------------------------------|---------------------------------------------------------------------------------------------------------------------------|
| fig 6666666.28482.peg.4776 | Contig_60 | 8420  | 9574  | + | FIG00830848:<br>hypothetical protein                                           | FIG00830846 ff                                                                                                            |
| fig 6666666.28482.peg.4777 | Contig_60 | 9686  | 9898  | + | hypothetical protein                                                           |                                                                                                                           |
| fig 6666666.28482.peg.4778 | Contig_60 | 10026 | 11003 | + | hypothetical protein                                                           | FIG00638284 ff                                                                                                            |
| fig 6666666.28482.peg.4779 | Contig_60 | 11006 | 12145 | + | Ferredoxin                                                                     | FIG00459778 idu(4);Soluble_cytochromes_and_functionally_related_electron_carriers<br>idu(4);Inorganic_Sulfur_Assimilation |
| fig 6666666.28482.peg.4780 | Contig_60 | 12168 | 12983 | + | 2-polyprenylphenol<br>hydroxylase and related<br>flavodoxin<br>oxidoreductases | FIG00460593 isu;Central_meta-<br>cleavage_pathway_of_aromatic_compound_degradation                                        |
| fig 6666666.28482.peg.4781 | Contig_60 | 12984 | 13742 | + | NAD-reducing<br>hydrogenase subunit<br>HoxY (EC 1.12.1.2)                      | FIG00006962 icw(1);Hydrogenases                                                                                           |
| fig 6666666.28482.peg.4782 | Contig_60 | 13739 | 15031 | + | Cytochrome-C3<br>hydrogenase alpha chain                                       | FIG00995412 ff                                                                                                            |
| fig 6666666.28482.peg.4783 | Contig_60 | 15028 | 15507 | + | Ni,Fe-hydrogenase<br>maturation factor                                         | FIG00054664 isu;Hydrogenases                                                                                              |
| fig 6666666.28482.peg.4784 | Contig_60 | 15512 | 16921 | + | Putative membrane<br>protein MT1655                                            | FIG01531367 ff                                                                                                            |
| fig 6666666.28482.peg.4785 | Contig_60 | 17357 | 16923 | - | pyridoxamine 5'-<br>phosphate oxidase family<br>protein                        |                                                                                                                           |
| fig 6666666.28482.peg.4786 | Contig_60 | 18432 | 17419 | - | Oxygen-insensitive<br>NADPH nitroreductase<br>(EC 1.-.-.-)                     | FIG00904859 ff                                                                                                            |

|                            |           |       |       |   |                                                                                                             |             |                                                                                                                                |
|----------------------------|-----------|-------|-------|---|-------------------------------------------------------------------------------------------------------------|-------------|--------------------------------------------------------------------------------------------------------------------------------|
| fig 6666666.28482.peg.4787 | Contig_60 | 18763 | 18509 | - | Acyl carrier protein                                                                                        | FIG00002328 | idu(2);Fatty_Acid_Biosynthesis_FASII<br>idu(2);Glycerolipid_and_Glycerophos<br>pholipid_Metabolism_in_Bacteria                 |
| fig 6666666.28482.peg.4788 | Contig_60 | 20008 | 18779 | - | Dihydrolipoamide<br>acetyltransferase<br>component (E2) of<br>acetoin dehydrogenase<br>complex (EC 2.3.1.-) | FIG00001753 | isu;Acetoin,_butanediol_metabolism<br>icw(2);Dehydrogenase_complexes                                                           |
| fig 6666666.28482.peg.4789 | Contig_60 | 20994 | 20005 | - | Acetoin dehydrogenase<br>E1 component beta-<br>subunit (EC 1.2.4.-)                                         | FIG01270039 | icw(1);Acetoin,_butanediol_metaboli<br>sm idu(1);Dehydrogenase_complexes                                                       |
| fig 6666666.28482.peg.4790 | Contig_60 | 22022 | 20991 | - | Acetoin dehydrogenase<br>E1 component alpha-<br>subunit (EC 1.2.4.-)                                        | FIG00138523 | icw(2);Acetoin,_butanediol_metaboli<br>sm icw(1);Dehydrogenase_complexes                                                       |
| fig 6666666.28482.peg.4791 | Contig_60 | 23830 | 22019 | - | Acetyl-coenzyme A<br>synthetase (EC 6.2.1.1)                                                                | FIG00022631 | idu(2);Pyruvate_metabolism_II:_acet<br>yl-CoA,_acetogenesis_from_pyruvate<br>idu(2);Ketoisovalerate_oxidoreductas<br>e         |
| fig 6666666.28482.peg.4792 | Contig_60 | 24017 | 25003 | + | hypothetical protein                                                                                        | FIG00460883 | isu;Fructose_utilization<br>isu;Lactose_and_Galactose_Uptake_a<br>nd_Utilization isu;D-<br>Tagatose_and_Galactitol_Utilization |
| fig 6666666.28482.peg.4793 | Contig_60 | 25013 | 25294 | + | hypothetical protein                                                                                        |             |                                                                                                                                |
| fig 6666666.28482.peg.4794 | Contig_60 | 25296 | 25538 | + | hypothetical protein                                                                                        |             |                                                                                                                                |
| fig 6666666.28482.peg.4795 | Contig_60 | 25681 | 26673 | + | Tagatose-6-phosphate<br>kinase (EC 2.7.1.144) / 1-<br>phosphofructokinase (EC<br>2.7.1.56)                  |             |                                                                                                                                |

|                            |           |       |       |   |                                                       |             |                               |
|----------------------------|-----------|-------|-------|---|-------------------------------------------------------|-------------|-------------------------------|
| fig 6666666.28482.peg.4796 | Contig_60 | 26741 | 27529 | + | Universal stress protein family                       | FIG00017615 | ff                            |
| fig 6666666.28482.peg.4797 | Contig_60 | 27540 | 28376 | + | Universal stress protein family                       |             |                               |
| fig 6666666.28482.peg.4798 | Contig_60 | 28436 | 29107 | + | Two component transcriptional regulatory protein DevR | FIG01330944 | ff                            |
| fig 6666666.28482.peg.4799 | Contig_60 | 29278 | 30996 | + | Two-component sensor histidine kinase                 | FIG00821297 | ff                            |
| fig 6666666.28482.peg.4800 | Contig_60 | 31055 | 31603 | + | GCN5-related N-acetyltransferase                      |             |                               |
| fig 6666666.28482.peg.4801 | Contig_60 | 31591 | 32478 | + | Universal stress protein family                       | FIG00017615 | ff                            |
| fig 6666666.28482.peg.4802 | Contig_60 | 32475 | 32849 | + | hypothetical protein                                  |             |                               |
| fig 6666666.28482.peg.4803 | Contig_60 | 32900 | 34288 | + | Partial REP13E12 repeat protein                       | FIG00820827 | ff                            |
| fig 6666666.28482.peg.4804 | Contig_60 | 35097 | 34291 | - | Universal stress protein family                       | FIG00017615 | ff                            |
| fig 6666666.28482.peg.4805 | Contig_60 | 38873 | 35202 | - | Trehalose-6-phosphate phosphatase (EC 3.1.3.12)       | FIG00001349 | idu(1);Trehalose_Biosynthesis |
| fig 6666666.28482.peg.4806 | Contig_60 | 39142 | 38936 | - | hypothetical protein                                  |             |                               |
| fig 6666666.28482.peg.4807 | Contig_60 | 39006 | 39893 | + | Universal stress protein family                       | FIG00017615 | ff                            |
| fig 6666666.28482.peg.4808 | Contig_60 | 39932 | 41395 | + | FIG00828840: hypothetical protein                     | FIG00828836 | ff                            |
| fig 6666666.28482.peg.4809 | Contig_60 | 41506 | 42510 | + | Oxygen-insensitive NADPH nitroreductase (EC 1.-.-.-)  | FIG00904859 | ff                            |

|                            |           |       |       |   |                                                                 |             |                                                             |
|----------------------------|-----------|-------|-------|---|-----------------------------------------------------------------|-------------|-------------------------------------------------------------|
| fig 6666666.28482.peg.4810 | Contig_60 | 42526 | 43629 | + | 3-oxoacyl-[acyl-carrier-protein] synthase, KASIII (EC 2.3.1.41) | FIG00015100 | icw(1);Fatty_Acid_Biosynthesis_FASII                        |
| fig 6666666.28482.peg.4811 | Contig_60 | 43613 | 44494 | + | 3-oxoacyl-[acyl-carrier-protein] synthase, KASIII (EC 2.3.1.41) | FIG00015100 | icw(1);Fatty_Acid_Biosynthesis_FASII                        |
| fig 6666666.28482.peg.4812 | Contig_60 | 46984 | 44588 | - | Phosphoenolpyruvate synthase (EC 2.7.9.2)                       | FIG00000789 | idu(2);Pyruvate_metabolism_I:_anaplerotic_reactions,_PEP    |
| fig 6666666.28482.peg.4813 | Contig_60 | 47093 | 48472 | + | Wax ester synthase/acyl-CoA:diacylglycerol acyltransferase      | FIG01309728 | ff                                                          |
| fig 6666666.28482.peg.4814 | Contig_60 | 49145 | 48462 | - | FIG00827884: hypothetical protein                               | FIG00827881 | ff                                                          |
| fig 6666666.28482.peg.4815 | Contig_60 | 49678 | 49220 | - | 18 kDa antigen                                                  | FIG01612281 | ff                                                          |
| fig 6666666.28482.peg.4816 | Contig_60 | 49825 | 50202 | + | HspR                                                            | FIG01507885 | ff                                                          |
| fig 6666666.28482.peg.4817 | Contig_60 | 50374 | 51090 | + | FIG00824452: hypothetical protein                               | FIG00824450 | ff                                                          |
| fig 6666666.28482.peg.4818 | Contig_60 | 51136 | 52323 | + | FIG00826673: hypothetical protein                               | FIG00826669 | ff                                                          |
| fig 6666666.28482.peg.4819 | Contig_60 | 52393 | 54543 | + | Glycogen debranching enzyme (EC 3.2.1.-)                        | FIG00109688 | idu(3);Trehalose_Biosynthesis<br>idu(3);Glycogen_metabolism |
| fig 6666666.28482.peg.4820 | Contig_60 | 54636 | 55406 | + | Short chain dehydrogenase                                       | FIG01310822 | ff                                                          |
| fig 6666666.28482.peg.4821 | Contig_60 | 56380 | 55403 | - | aldo/keto reductase                                             | FIG01122489 | ff                                                          |
| fig 6666666.28482.peg.4822 | Contig_60 | 57389 | 56394 | - | PknJ                                                            |             |                                                             |
| fig 6666666.28482.peg.4823 | Contig_60 | 57489 | 58037 | + | hypothetical protein                                            |             |                                                             |
| fig 6666666.28482.peg.4824 | Contig_60 | 58492 | 59052 | + | FIG00823781: hypothetical protein                               | FIG00823780 | ff                                                          |
| fig 6666666.28482.peg.4825 | Contig_60 | 59067 | 59720 | + | Uracil-DNA glycosylase, putative family 6                       | FIG00025538 | isu;Uracil-DNA_glycosylase                                  |

|                            |           |       |       |   |                                                                                                  |             |                                                                                                                             |
|----------------------------|-----------|-------|-------|---|--------------------------------------------------------------------------------------------------|-------------|-----------------------------------------------------------------------------------------------------------------------------|
| fig 6666666.28482.peg.4826 | Contig_60 | 61528 | 59735 | - | pyruvate decarboxylase                                                                           | FIG00957120 | ff                                                                                                                          |
| fig 6666666.28482.peg.4827 | Contig_60 | 61664 | 61521 | - | hypothetical protein                                                                             |             |                                                                                                                             |
| fig 6666666.28482.peg.4828 | Contig_60 | 62716 | 61739 | - | ADP-heptose--<br>lipooligosaccharide<br>heptosyltransferase II (EC<br>2.4.1.-)                   | FIG00013366 | icw(1);LOS_core_oligosaccharide_bio<br>synthesis                                                                            |
| fig 6666666.28482.peg.4829 | Contig_60 | 63411 | 62707 | - | FIG00825699:<br>hypothetical protein                                                             | FIG00825697 | ff                                                                                                                          |
| fig 6666666.28482.peg.4830 | Contig_60 | 63920 | 63423 | - | ADP-heptose synthase<br>(EC 2.7.-.-) / D-glycero-<br>beta-D-manno-heptose 7-<br>phosphate kinase |             | isu;LOS_core_oligosaccharide_biosyn<br>thesis<br>icw(1);LOS_core_oligosaccharide_bio<br>synthesis                           |
| fig 6666666.28482.rna.45   | Contig_61 | 582   | 509   | - | tRNA-Pro-GGG                                                                                     |             | isu;tRNAs                                                                                                                   |
| fig 6666666.28482.peg.4831 | Contig_61 | 1389  | 643   | - | Transcriptional regulator,<br>IclR family                                                        | FIG00022569 | idu(12);Homogentisate_pathway_of_<br>aromatic_compound_degradation                                                          |
| fig 6666666.28482.peg.4832 | Contig_61 | 2216  | 1386  | - | Kynurenine<br>formamidase, bacterial<br>(EC 3.5.1.9)                                             | FIG00001524 | isu;NAD_and_NADP_cofactor_biosyn<br>thesis_global<br>isu;Aromatic_amino_acid_degradatio<br>n                                |
| fig 6666666.28482.peg.4833 | Contig_61 | 2988  | 2230  | - | Probable oxidoreductase<br>(EC 1.-.-.-)                                                          |             |                                                                                                                             |
| fig 6666666.28482.peg.4834 | Contig_61 | 4717  | 3317  | - | GTP-binding protein EngA                                                                         | FIG00129616 | isu;Ribosome_post-<br>transcriptional_modification_and_chr<br>omosomal_segregation_cluster<br>isu;CBSS-290633.1.peg.1906    |
| fig 6666666.28482.peg.4835 | Contig_61 | 5388  | 4714  | - | Cytidylate kinase (EC<br>2.7.4.14)                                                               | FIG00041008 | icw(2);Ribosome_post-<br>transcriptional_modification_and_chr<br>omosomal_segregation_cluster<br>isu;pyrimidine_conversions |

|                            |           |       |      |   |                                                                                               |             |                                                                                                                                                                                                                                                                                        |
|----------------------------|-----------|-------|------|---|-----------------------------------------------------------------------------------------------|-------------|----------------------------------------------------------------------------------------------------------------------------------------------------------------------------------------------------------------------------------------------------------------------------------------|
| fig 6666666.28482.peg.4836 | Contig_61 | 6131  | 5385 | - | Ribosomal large subunit pseudouridine synthase B (EC 4.2.1.70)                                | FIG01956038 | icw(2);CBSS-314276.3.peg.1499<br>icw(2);Ribosome_post-transcriptional_modification_and_chromosomal_segregation_cluster<br>isu;RNA_pseudouridine_syntheses                                                                                                                              |
| fig 6666666.28482.peg.4837 | Contig_61 | 6826  | 6128 | - | Segregation and condensation protein B                                                        | FIG00133569 | isu;CBSS-314276.3.peg.1499<br>icw(4);Ribosome_post-transcriptional_modification_and_chromosomal_segregation_cluster                                                                                                                                                                    |
| fig 6666666.28482.peg.4838 | Contig_61 | 7623  | 6823 | - | Segregation and condensation protein A                                                        | FIG00019652 | icw(1);CBSS-314276.3.peg.1499<br>icw(5);Ribosome_post-transcriptional_modification_and_chromosomal_segregation_cluster                                                                                                                                                                 |
| fig 6666666.28482.peg.4839 | Contig_61 | 8540  | 7620 | - | Chromosome (plasmid) partitioning protein ParA / Sporulation initiation inhibitor protein Soj | FIG00006461 | idu(2);RNA_modification_and_chromosome_partitioning_cluster<br>idu(2);Bacterial_Cell_Division<br>icw(7);Ribosome_post-transcriptional_modification_and_chromosomal_segregation_cluster<br>idu(2);Bacterial_Cytoskeleton<br>idu(2);Bacterial_Cytoskeleton<br>idu(2);Plasmid_replication |
| fig 6666666.28482.peg.4840 | Contig_61 | 8671  | 9423 | + | Probable catechol-o-methyltransferase (EC 2.1.1.6)                                            | FIG01323336 | ff                                                                                                                                                                                                                                                                                     |
| fig 6666666.28482.peg.4841 | Contig_61 | 10437 | 9496 | - | Tyrosine recombinase XerD                                                                     | FIG01227142 | ff                                                                                                                                                                                                                                                                                     |

|                            |           |       |       |   |                                                           |             |                                                                                                                                                                                                                                                                       |
|----------------------------|-----------|-------|-------|---|-----------------------------------------------------------|-------------|-----------------------------------------------------------------------------------------------------------------------------------------------------------------------------------------------------------------------------------------------------------------------|
| fig 6666666.28482.peg.4842 | Contig_61 | 11057 | 10434 | - | ADP-ribose<br>pyrophosphatase (EC<br>3.6.1.13)            | FIG00000367 | idu(1);NAD_and_NADP_cofactor_biosynthesis_global idu(1);CBSS-216591.1.peg.168<br>idu(1);Nudix_proteins_(nucleoside_triphosphate_hydrolases)<br>idu(1);Ribosome_post-transcriptional_modification_and_chromosomal_segregation_cluster<br>idu(1);CBSS-342610.3.peg.1794 |
| fig 6666666.28482.peg.4843 | Contig_61 | 12801 | 11050 | - | CTP synthase (EC 6.3.4.2)                                 | FIG00000176 | isu;CTP_synthase_(EC_6.3.4.2)_cluster icw(2);Ribosome_post-transcriptional_modification_and_chromosomal_segregation_cluster<br>isu;pyrimidine_conversions                                                                                                             |
| fig 6666666.28482.peg.4844 | Contig_61 | 13874 | 12930 | - | FIG007481: hypothetical protein                           | FIG00007481 | isu;CBSS-446462.5.peg.2987                                                                                                                                                                                                                                            |
| fig 6666666.28482.peg.4845 | Contig_61 | 15079 | 13898 | - | FIG005773: conserved membrane protein ML1361              | FIG00005773 | icw(1);CBSS-446462.5.peg.2987                                                                                                                                                                                                                                         |
| fig 6666666.28482.peg.4846 | Contig_61 | 15457 | 15161 | - | hypothetical protein                                      |             |                                                                                                                                                                                                                                                                       |
| fig 6666666.28482.peg.4847 | Contig_62 | 590   | 183   | - | Methyltransferase type 11                                 |             |                                                                                                                                                                                                                                                                       |
| fig 6666666.28482.peg.4848 | Contig_62 | 1512  | 811   | - | putative DNA-binding protein                              |             |                                                                                                                                                                                                                                                                       |
| fig 6666666.28482.peg.4849 | Contig_62 | 2157  | 1555  | - | FIG00824105: hypothetical protein                         | FIG00824104 | ff                                                                                                                                                                                                                                                                    |
| fig 6666666.28482.peg.4850 | Contig_62 | 2250  | 3320  | + | diguanylate cyclase                                       |             |                                                                                                                                                                                                                                                                       |
| fig 6666666.28482.peg.4851 | Contig_62 | 3439  | 3912  | + | hypothetical protein                                      | FIG00638284 | ff                                                                                                                                                                                                                                                                    |
| fig 6666666.28482.peg.4852 | Contig_62 | 4724  | 3933  | - | Succinate dehydrogenase iron-sulfur protein (EC 1.3.99.1) | FIG00026006 | icw(1);Serine-glyoxylate_cycle<br>icw(1);TCA_Cycle<br>idu(1);Succinate_dehydrogenase                                                                                                                                                                                  |

|                            |           |       |       |   |                                                             |             |                                                                                      |
|----------------------------|-----------|-------|-------|---|-------------------------------------------------------------|-------------|--------------------------------------------------------------------------------------|
| fig 6666666.28482.peg.4853 | Contig_62 | 6478  | 4724  | - | Succinate dehydrogenase flavoprotein subunit (EC 1.3.99.1)  | FIG00136922 | idu(1);Serine-glyoxylate_cycle<br>idu(1);TCA_Cycle<br>icw(3);Succinate_dehydrogenase |
| fig 6666666.28482.peg.4854 | Contig_62 | 6965  | 6498  | - | Succinate dehydrogenase hydrophobic membrane anchor protein | FIG00000807 | icw(1);Succinate_dehydrogenase                                                       |
| fig 6666666.28482.peg.4855 | Contig_62 | 7099  | 6962  | - | hypothetical protein                                        |             |                                                                                      |
| fig 6666666.28482.peg.4856 | Contig_62 | 7118  | 8227  | + | Mobile element protein                                      | FIG01306568 | ff                                                                                   |
| fig 6666666.28482.peg.4857 | Contig_62 | 8613  | 8275  | - | Succinate dehydrogenase cytochrome b-556 subunit            | FIG00000800 | icw(2);Succinate_dehydrogenase                                                       |
| fig 6666666.28482.peg.4858 | Contig_62 | 8821  | 9225  | + | Cytidine deaminase (EC 3.5.4.5)                             | FIG00000720 | isu;pyrimidine_conversions                                                           |
| fig 6666666.28482.peg.4859 | Contig_62 | 9222  | 10520 | + | Thymidine phosphorylase (EC 2.4.2.4)                        | FIG00001131 | isu;Deoxyribose_and_Deoxynucleoside_Catabolism<br>icw(1);pyrimidine_conversions      |
| fig 6666666.28482.peg.4860 | Contig_62 | 10517 | 11596 | + | Adenosine deaminase (EC 3.5.4.4)                            | FIG00000687 | isu;Purine_conversions                                                               |
| fig 6666666.28482.peg.4861 | Contig_62 | 11887 | 11603 | - | Possible membrane protein                                   |             |                                                                                      |
| fig 6666666.28482.peg.4862 | Contig_62 | 11996 | 12679 | + | hypothetical protein                                        |             |                                                                                      |
| fig 6666666.28482.peg.4863 | Contig_62 | 13359 | 12682 | - | GntR-family transcriptional regulator                       |             |                                                                                      |
| fig 6666666.28482.peg.4864 | Contig_62 | 13518 | 14552 | + | Gentisate 1,2-dioxygenase (EC 1.13.11.4)                    | FIG00015188 | isu;Gentisate_degradation<br>isu;Salicylate_and_gentisate_catabolism                 |

|                            |           |       |       |   |                                                         |             |                                                                                                                                          |
|----------------------------|-----------|-------|-------|---|---------------------------------------------------------|-------------|------------------------------------------------------------------------------------------------------------------------------------------|
| fig 6666666.28482.peg.4865 | Contig_62 | 14606 | 15613 | + | FIG00827792:<br>hypothetical protein                    | FIG00827785 | ff                                                                                                                                       |
| fig 6666666.28482.peg.4866 | Contig_62 | 16601 | 15618 | - | PROBABLE MEMBRANE<br>PROTEIN                            | FIG00816212 | ff                                                                                                                                       |
| fig 6666666.28482.peg.4867 | Contig_62 | 17975 | 16668 | - | FIG026501: hypothetical<br>protein                      | FIG00544282 | ff                                                                                                                                       |
| fig 6666666.28482.peg.4868 | Contig_62 | 18879 | 18028 | - | Possible acid<br>phosphatase (EC 3.1.3.2)               | FIG01343968 | ff                                                                                                                                       |
| fig 6666666.28482.peg.4869 | Contig_62 | 18972 | 19595 | + | phosphoribosyltransferas<br>e                           |             | icw(1);pyrimidine_conversions                                                                                                            |
| fig 6666666.28482.peg.4870 | Contig_62 | 21164 | 19596 | - | Phosphomannomutase<br>(EC 5.4.2.8)                      | FIG00001022 | isu;Mannose_Metabolism                                                                                                                   |
| fig 6666666.28482.peg.4871 | Contig_62 | 21975 | 21169 | - | Purine nucleoside<br>phosphorylase (EC<br>2.4.2.1)      | FIG00000659 | isu;Purine_conversions<br>isu;Adenosyl_nucleosidases<br>isu;Deoxyribose_and_Deoxynucleosid<br>e_Catabolism<br>isu;pyrimidine_conversions |
| fig 6666666.28482.peg.4872 | Contig_62 | 22016 | 22681 | + | cutinase                                                | FIG01407927 | ff                                                                                                                                       |
| fig 6666666.28482.peg.4873 | Contig_62 | 24148 | 22685 | - | PPE family protein                                      | FIG00013075 | idu(57);CBSS-164757.7.peg.5020                                                                                                           |
| fig 6666666.28482.peg.4874 | Contig_63 | 70    | 573   | + | Phosphohistidine<br>phosphatase SixA                    | FIG00001992 | ff                                                                                                                                       |
| fig 6666666.28482.peg.4875 | Contig_63 | 1079  | 570   | - | Putative lipoprotein LprC<br>precursor                  | FIG01333765 | ff                                                                                                                                       |
| fig 6666666.28482.peg.4876 | Contig_63 | 1651  | 1124  | - | Lipoprotein LprB                                        | FIG01320481 | ff                                                                                                                                       |
| fig 6666666.28482.peg.4877 | Contig_63 | 1801  | 3546  | + | ABC transporter ATP-<br>binding protein                 | FIG01956052 | ff                                                                                                                                       |
| fig 6666666.28482.peg.4878 | Contig_63 | 3543  | 5420  | + | Lipid A export ATP-<br>binding/permease<br>protein MsbA | FIG00017059 | ff                                                                                                                                       |
| fig 6666666.28482.peg.4879 | Contig_63 | 5473  | 5796  | + | hypothetical protein                                    |             |                                                                                                                                          |
| fig 6666666.28482.peg.4880 | Contig_63 | 5820  | 6506  | + | FIG00820366:<br>hypothetical protein                    | FIG00820364 | ff                                                                                                                                       |

|                            |           |       |       |   |                                                                 |             |                                                           |
|----------------------------|-----------|-------|-------|---|-----------------------------------------------------------------|-------------|-----------------------------------------------------------|
| fig 6666666.28482.peg.4881 | Contig_63 | 6699  | 7727  | + | Transcriptional regulatory protein EmrR                         | FIG01308039 | ff                                                        |
| fig 6666666.28482.peg.4882 | Contig_63 | 7821  | 8177  | + | FIG00820785: hypothetical protein                               | FIG00820783 | ff                                                        |
| fig 6666666.28482.peg.4883 | Contig_63 | 8355  | 9053  | + | FIG00820366: hypothetical protein                               | FIG00820364 | ff                                                        |
| fig 6666666.28482.peg.4884 | Contig_63 | 9092  | 10846 | + | Serine/threonine protein kinase (EC 2.7.11.1)                   | FIG00933379 | ff                                                        |
| fig 6666666.28482.peg.4885 | Contig_63 | 11009 | 12895 | + | Serine/threonine protein kinase (EC 2.7.11.1)                   | FIG00933379 | ff                                                        |
| fig 6666666.28482.peg.4886 | Contig_63 | 13497 | 12913 | - | FIG00820425: hypothetical protein                               | FIG00820423 | ff                                                        |
| fig 6666666.28482.peg.4887 | Contig_63 | 14865 | 13738 | - | Adenylate cyclase (EC 4.6.1.1)                                  | FIG00001294 | idu(25);cAMP_signaling_in_bacteria                        |
| fig 6666666.28482.peg.4888 | Contig_63 | 16252 | 14876 | - | Amidase (EC 3.5.1.4)                                            | FIG00454158 | ff                                                        |
| fig 6666666.28482.peg.4889 | Contig_63 | 16296 | 16748 | + | Bis(5'-nucleosyl)-tetraphosphatase (asymmetrical) (EC 3.6.1.17) | FIG00008590 | isu;CBSS-176299.4.peg.1996A<br>isu;pyrimidine_conversions |
| fig 6666666.28482.peg.4890 | Contig_63 | 16753 | 17202 | + | FIG029194: hypothetical protein                                 | FIG01351665 | ff                                                        |
| fig 6666666.28482.peg.4891 | Contig_63 | 17288 | 21232 | + | FIG00826180: hypothetical protein                               | FIG00826177 | ff                                                        |
| fig 6666666.28482.peg.4892 | Contig_63 | 22260 | 21229 | - | bacterial luciferase family protein                             | FIG01390817 | ff                                                        |
| fig 6666666.28482.peg.4893 | Contig_63 | 22279 | 22413 | + | hypothetical protein                                            |             |                                                           |
| fig 6666666.28482.peg.4894 | Contig_63 | 23525 | 22407 | - | Oxidoreductase                                                  | FIG01321859 | ff                                                        |
| fig 6666666.28482.peg.4895 | Contig_63 | 24433 | 23522 | - | Uracil-DNA glycosylase, family 5                                | FIG00018955 | isu;Uracil-DNA_glycosylase                                |

|                            |           |       |       |   |                                                   |             |                                            |
|----------------------------|-----------|-------|-------|---|---------------------------------------------------|-------------|--------------------------------------------|
| fig 6666666.28482.peg.4896 | Contig_63 | 24412 | 25653 | + | H+ antiporter integral membrane transport protein | FIG01357208 | ff                                         |
| fig 6666666.28482.peg.4897 | Contig_63 | 25674 | 27041 | + | "Glycolate oxidase, subunit GlcD"                 | FIG00821456 | ff                                         |
| fig 6666666.28482.peg.4898 | Contig_63 | 27874 | 27053 | - | O-methyltransferase-like protein                  | FIG01479193 | ff                                         |
| fig 6666666.28482.peg.4899 | Contig_63 | 28341 | 27871 | - | hypothetical protein                              | FIG00638284 | ff                                         |
| fig 6666666.28482.peg.4900 | Contig_63 | 28426 | 29646 | + | Cytochrome P450 130                               | FIG01370899 | ff                                         |
| fig 6666666.28482.peg.4901 | Contig_63 | 29643 | 30215 | + | Possible oxidoreductase subunit                   | FIG01327895 | ff                                         |
| fig 6666666.28482.peg.4902 | Contig_63 | 31768 | 30512 | - | putative peptide monooxygenase                    |             |                                            |
| fig 6666666.28482.peg.4903 | Contig_63 | 32561 | 31755 | - | Putative hemolysin                                | FIG01004154 | ff                                         |
| fig 6666666.28482.peg.4904 | Contig_63 | 34153 | 32573 | - | hypothetical protein                              | FIG00638284 | ff                                         |
| fig 6666666.28482.peg.4905 | Contig_63 | 35296 | 34154 | - | Acyltransferase                                   | FIG01336741 | ff                                         |
| fig 6666666.28482.peg.4906 | Contig_63 | 36960 | 35293 | - | Cold-shock DEAD-box protein A                     | FIG00001381 | isu;ATP-dependent_RNA_helicases,_bacterial |
| fig 6666666.28482.peg.4907 | Contig_63 | 37308 | 36973 | - | hypothetical protein                              |             |                                            |
| fig 6666666.28482.peg.4908 | Contig_63 | 37319 | 37657 | + | Putative lipoprotein lprE precursor               | FIG01347963 | ff                                         |
| fig 6666666.28482.peg.4909 | Contig_63 | 37976 | 37686 | - | PE-PGRS FAMILY PROTEIN                            |             |                                            |
| fig 6666666.28482.peg.4910 | Contig_64 | 53    | 373   | + | hypothetical protein                              |             |                                            |
| fig 6666666.28482.peg.4911 | Contig_64 | 1962  | 577   | - | Glycyl-tRNA synthetase (EC 6.1.1.14)              | FIG00001189 | isu;tRNA_aminoacylation,_Gly               |
| fig 6666666.28482.peg.4912 | Contig_64 | 2162  | 2602  | + | Transcriptional regulator, ArsR family            | FIG00003845 | idu(3);CBSS-1085.1.peg.1363                |
| fig 6666666.28482.peg.4913 | Contig_64 | 2649  | 3041  | + | Zinc uptake regulation protein ZUR                | FIG00000479 | isu;Oxidative_stress                       |

|                            |           |       |       |   |                                                                                                                 |             |                                                                                                                                                                             |
|----------------------------|-----------|-------|-------|---|-----------------------------------------------------------------------------------------------------------------|-------------|-----------------------------------------------------------------------------------------------------------------------------------------------------------------------------|
| fig 6666666.28482.peg.4914 | Contig_64 | 3188  | 4186  | + | Hydrolase, alpha/beta fold family                                                                               | FIG01359650 | ff                                                                                                                                                                          |
| fig 6666666.28482.peg.4915 | Contig_64 | 4611  | 4183  | - | FIG00820411: hypothetical protein                                                                               | FIG00820410 | ff                                                                                                                                                                          |
| fig 6666666.28482.peg.4916 | Contig_64 | 5495  | 4611  | - | Undecaprenyl pyrophosphate synthetase (EC 2.5.1.31)                                                             | FIG00000110 | ff                                                                                                                                                                          |
| fig 6666666.28482.peg.4917 | Contig_64 | 6258  | 5488  | - | DNA recombination and repair protein RecO                                                                       | FIG00000315 | ff                                                                                                                                                                          |
| fig 6666666.28482.peg.4918 | Contig_64 | 6347  | 7852  | + | Asp-tRNA <sup>Asn</sup> /Glu-tRNA <sup>Gln</sup> amidotransferase A subunit and related amidases                | FIG00634208 | ff                                                                                                                                                                          |
| fig 6666666.28482.peg.4919 | Contig_64 | 7914  | 9371  | + | Arginine decarboxylase (EC 4.1.1.19); Ornithine decarboxylase (EC 4.1.1.17); Lysine decarboxylase (EC 4.1.1.18) | FIG01304207 | idu(1);Arginine_and_Ornithine_Degradation<br>isu;Arginine_and_Ornithine_Degradation<br>idu(1);Lysine_degradation<br>idu(1);Polyamine_Metabolism<br>isu;Polyamine_Metabolism |
| fig 6666666.28482.peg.4920 | Contig_64 | 10164 | 9373  | - | dehydrogenase DhgA                                                                                              | FIG01304818 | isu;Bacterial_Cell_Division                                                                                                                                                 |
| fig 6666666.28482.peg.4921 | Contig_64 | 11117 | 10206 | - | GTP-binding protein Era                                                                                         |             |                                                                                                                                                                             |
| fig 6666666.28482.peg.4922 | Contig_64 | 11434 | 11114 | - | hypothetical protein                                                                                            | FIG00042627 | idu(1);CBSS-56780.10.peg.1536                                                                                                                                               |
| fig 6666666.28482.peg.4923 | Contig_64 | 12738 | 11431 | - | Magnesium and cobalt efflux protein CorC                                                                        |             |                                                                                                                                                                             |
| fig 6666666.28482.peg.4924 | Contig_64 | 13364 | 12840 | - | PE-PGRS family protein                                                                                          |             | idu(16);PPE_gene_cluster_in_Mycobacteria                                                                                                                                    |
| fig 6666666.28482.peg.4925 | Contig_65 | 145   | 891   | + | hypothetical protein                                                                                            |             |                                                                                                                                                                             |

|                            |           |       |       |   |                                                                                           |             |                                                                                                                                                                                                                        |
|----------------------------|-----------|-------|-------|---|-------------------------------------------------------------------------------------------|-------------|------------------------------------------------------------------------------------------------------------------------------------------------------------------------------------------------------------------------|
| fig 6666666.28482.peg.4926 | Contig_65 | 2531  | 1152  | - | 3-phenylpropionate dioxygenase alpha subunit (digoxigenin alpha subunit)( EC:1.14.12.18 ) |             |                                                                                                                                                                                                                        |
| fig 6666666.28482.peg.4927 | Contig_65 | 3456  | 2551  | - | 3-oxoacyl-[acyl-carrier-protein] reductase( EC:1.1.1.100 )                                |             |                                                                                                                                                                                                                        |
| fig 6666666.28482.peg.4928 | Contig_65 | 4435  | 3539  | - | probable enoyl-CoA hydratase( EC:4.2.1.17 )                                               |             |                                                                                                                                                                                                                        |
| fig 6666666.28482.peg.4929 | Contig_65 | 4511  | 4942  | + | hypothetical protein                                                                      |             |                                                                                                                                                                                                                        |
| fig 6666666.28482.peg.4930 | Contig_65 | 4985  | 6295  | + | amidohydrolase 2                                                                          |             |                                                                                                                                                                                                                        |
| fig 6666666.28482.peg.4931 | Contig_65 | 6292  | 7485  | + | Butyryl-CoA dehydrogenase (EC 1.3.99.2)                                                   | FIG00009149 | idu(39);Isoleucine_degradation<br>idu(39);Lysine_fermentation<br>idu(39);Butanol_Biosynthesis<br>idu(39);Acetyl-CoA_fermentation_to_Butyrate<br>idu(39);Valine_degradation<br>idu(39);Anaerobic_respiratory_reductions |
| fig 6666666.28482.peg.4932 | Contig_65 | 7475  | 8560  | + | acyl-CoA dehydrogenase-like protein                                                       |             |                                                                                                                                                                                                                        |
| fig 6666666.28482.peg.4933 | Contig_65 | 8557  | 10695 | + | hypothetical protein                                                                      | FIG00638284 | ff                                                                                                                                                                                                                     |
| fig 6666666.28482.peg.4934 | Contig_65 | 10709 | 10915 | + | hypothetical protein                                                                      |             |                                                                                                                                                                                                                        |
| fig 6666666.28482.peg.4935 | Contig_65 | 10912 | 12030 | + | Thiolase                                                                                  |             |                                                                                                                                                                                                                        |
| fig 6666666.28482.peg.4936 | Contig_65 | 12093 | 13307 | + | putative cytochrome P450 hydroxylase                                                      | FIG00032437 | icw(1);Nitric_oxide_synthase                                                                                                                                                                                           |
| fig 6666666.28482.peg.4937 | Contig_65 | 14808 | 13468 | - | hypothetical protein                                                                      | FIG00638284 | ff                                                                                                                                                                                                                     |
| fig 6666666.28482.peg.4938 | Contig_65 | 16179 | 14956 | - | hypothetical protein                                                                      | FIG00638284 | ff                                                                                                                                                                                                                     |
| fig 6666666.28482.peg.4939 | Contig_65 | 17393 | 16188 | - | putative cytochrome P450 hydroxylase                                                      | FIG00032437 | icw(2);Nitric_oxide_synthase                                                                                                                                                                                           |

|                            |           |       |       |   |                                                                  |             |                                                                                                              |
|----------------------------|-----------|-------|-------|---|------------------------------------------------------------------|-------------|--------------------------------------------------------------------------------------------------------------|
| fig 6666666.28482.peg.4940 | Contig_65 | 17530 | 18738 | + | putative subunit of succinyl-CoA:benzylsuccinate CoA-transferase |             |                                                                                                              |
| fig 6666666.28482.peg.4941 | Contig_65 | 18930 | 19937 | + | L-carnitine dehydratase/bile acid-inducible protein F            |             |                                                                                                              |
| fig 6666666.28482.peg.4942 | Contig_65 | 19934 | 20383 | + | Glyoxalase/bleomycin resistance protein/dioxygenase              |             |                                                                                                              |
| fig 6666666.28482.peg.4943 | Contig_65 | 20430 | 21629 | + | putative cytochrome P450 hydroxylase                             | FIG00032437 | icw(1);Nitric_oxide_synthase                                                                                 |
| fig 6666666.28482.peg.4944 | Contig_65 | 21632 | 22675 | + | acyl-CoA dehydrogenase                                           |             |                                                                                                              |
| fig 6666666.28482.peg.4945 | Contig_65 | 22678 | 23817 | + | acyl-CoA dehydrogenase, middle domain protein                    |             |                                                                                                              |
| fig 6666666.28482.peg.4946 | Contig_65 | 24042 | 23824 | - | hypothetical protein                                             |             |                                                                                                              |
| fig 6666666.28482.peg.4947 | Contig_65 | 24160 | 25455 | + | BarH                                                             | FIG00668014 | ff                                                                                                           |
| fig 6666666.28482.peg.4948 | Contig_65 | 26871 | 25477 | - | Adenylate cyclase (EC 4.6.1.1)                                   | FIG00001294 | idu(25);cAMP_signaling_in_bacteria                                                                           |
| fig 6666666.28482.peg.4949 | Contig_65 | 27914 | 26967 | - | Gluconolactonase (EC 3.1.1.17)                                   | FIG00127296 | ff                                                                                                           |
| fig 6666666.28482.peg.4950 | Contig_65 | 28459 | 27911 | - | hypothetical protein                                             |             |                                                                                                              |
| fig 6666666.28482.peg.4951 | Contig_65 | 29280 | 28465 | - | 3-oxoacyl-[acyl-carrier protein] reductase (EC 1.1.1.100)        | FIG00621114 | idu(38);CBSS-246196.1.peg.364<br>idu(38);CBSS-164757.7.peg.5020<br>idu(38);Fatty_Acid_Biosynthesis_FASI<br>I |
| fig 6666666.28482.peg.4952 | Contig_65 | 29405 | 30292 | + | hypothetical protein                                             |             |                                                                                                              |

|                            |           |       |       |   |                                      |             |                                                                                                                                                                                                                                                                                                                                          |
|----------------------------|-----------|-------|-------|---|--------------------------------------|-------------|------------------------------------------------------------------------------------------------------------------------------------------------------------------------------------------------------------------------------------------------------------------------------------------------------------------------------------------|
| fig 6666666.28482.peg.4953 | Contig_65 | 31111 | 30314 | - | Enoyl-CoA hydratase (EC 4.2.1.17)    | FIG00033206 | icw(3);n-Phenylalkanoic_acid_degradation<br>icw(3);Polyhydroxybutyrate_metabolism<br>icw(3);Isoleucine_degradation<br>icw(3);Fatty_acid_metabolism_cluster<br>icw(3);Lysine_fermentation<br>icw(3);Butanol_Biosynthesis<br>icw(3);Acetyl-CoA_fermentation_to_Butyrate<br>icw(3);Valine_degradation<br>icw(3);Butyrate_metabolism_cluster |
| fig 6666666.28482.peg.4954 | Contig_65 | 32310 | 31108 | - | putative cytochrome P450 hydroxylase | FIG00032437 | idu(49);Nitric_oxide_synthase                                                                                                                                                                                                                                                                                                            |
| fig 6666666.28482.peg.4955 | Contig_65 | 32406 | 33218 | + | Enoyl-CoA hydratase (EC 4.2.1.17)    | FIG00033206 | icw(4);n-Phenylalkanoic_acid_degradation<br>icw(4);Polyhydroxybutyrate_metabolism<br>icw(4);Isoleucine_degradation<br>icw(4);Fatty_acid_metabolism_cluster<br>icw(4);Lysine_fermentation<br>icw(4);Butanol_Biosynthesis<br>icw(4);Acetyl-CoA_fermentation_to_Butyrate<br>icw(4);Valine_degradation<br>icw(4);Butyrate_metabolism_cluster |

|                            |           |       |       |   |                                       |                                                                                                                                                                                                                                                                                                                              |
|----------------------------|-----------|-------|-------|---|---------------------------------------|------------------------------------------------------------------------------------------------------------------------------------------------------------------------------------------------------------------------------------------------------------------------------------------------------------------------------|
| fig 6666666.28482.peg.4956 | Contig_65 | 33221 | 34423 | + | acyl-CoA dehydrogenase domain protein |                                                                                                                                                                                                                                                                                                                              |
| fig 6666666.28482.peg.4957 | Contig_65 | 35184 | 34426 | - | Enoyl-CoA hydratase (EC 4.2.1.17)     | FIG00033206 icw(4);n-Phenylalkanoic_acid_degradation icw(4);Polyhydroxybutyrate_metabolism icw(4);Isoleucine_degradation icw(4);Fatty_acid_metabolism_cluster icw(4);Lysine_fermentation icw(4);Butanol_Biosynthesis icw(4);Acetyl-CoA_fermentation_to_Butyrate icw(4);Valine_degradation icw(4);Butyrate_metabolism_cluster |
| fig 6666666.28482.peg.4958 | Contig_65 | 35981 | 35181 | - | Enoyl-CoA hydratase (EC 4.2.1.17)     | FIG00033206 icw(4);n-Phenylalkanoic_acid_degradation icw(4);Polyhydroxybutyrate_metabolism icw(4);Isoleucine_degradation icw(4);Fatty_acid_metabolism_cluster icw(4);Lysine_fermentation icw(4);Butanol_Biosynthesis icw(4);Acetyl-CoA_fermentation_to_Butyrate icw(4);Valine_degradation icw(4);Butyrate_metabolism_cluster |

|                            |           |       |       |   |                                                                                           |             |                                                                                                                                                                                                                                                                                                                                          |
|----------------------------|-----------|-------|-------|---|-------------------------------------------------------------------------------------------|-------------|------------------------------------------------------------------------------------------------------------------------------------------------------------------------------------------------------------------------------------------------------------------------------------------------------------------------------------------|
| fig 6666666.28482.peg.4959 | Contig_65 | 36839 | 35988 | - | Enoyl-CoA hydratase (EC 4.2.1.17)                                                         | FIG00033206 | icw(3);n-Phenylalkanoic_acid_degradation<br>icw(3);Polyhydroxybutyrate_metabolism<br>icw(3);Isoleucine_degradation<br>icw(3);Fatty_acid_metabolism_cluster<br>icw(3);Lysine_fermentation<br>icw(3);Butanol_Biosynthesis<br>icw(3);Acetyl-CoA_fermentation_to_Butyrate<br>icw(3);Valine_degradation<br>icw(3);Butyrate_metabolism_cluster |
| fig 6666666.28482.peg.4960 | Contig_65 | 37054 | 36836 | - | hypothetical                                                                              |             |                                                                                                                                                                                                                                                                                                                                          |
| fig 6666666.28482.peg.4961 | Contig_65 | 39090 | 37066 | - | acetoin:2,6-dichlorophenolindophenol oxidoreductase beta subunit( EC:1.1.1.-,EC:1.2.4.1 ) |             |                                                                                                                                                                                                                                                                                                                                          |
| fig 6666666.28482.peg.4962 | Contig_65 | 39200 | 40474 | + | Lipase LipD                                                                               | FIG01326298 | ff                                                                                                                                                                                                                                                                                                                                       |
| fig 6666666.28482.peg.4963 | Contig_65 | 40532 | 40975 | + | hypothetical protein                                                                      |             |                                                                                                                                                                                                                                                                                                                                          |
| fig 6666666.28482.peg.4964 | Contig_65 | 41316 | 40972 | - | hypothetical protein                                                                      |             |                                                                                                                                                                                                                                                                                                                                          |
| fig 6666666.28482.peg.4965 | Contig_65 | 41762 | 41367 | - | protein of unknown function DUF35                                                         |             |                                                                                                                                                                                                                                                                                                                                          |
| fig 6666666.28482.peg.4966 | Contig_65 | 42910 | 41759 | - | Acetyl-CoA acetyltransferase                                                              | FIG01005417 | ff                                                                                                                                                                                                                                                                                                                                       |

|                            |           |       |       |   |                                                                 |             |                                                                                                                                                                                                                                                                                                                                                      |
|----------------------------|-----------|-------|-------|---|-----------------------------------------------------------------|-------------|------------------------------------------------------------------------------------------------------------------------------------------------------------------------------------------------------------------------------------------------------------------------------------------------------------------------------------------------------|
| fig 6666666.28482.peg.4967 | Contig_65 | 44412 | 42922 | - | Long-chain-fatty-acid--<br>CoA ligase (EC 6.2.1.3)              | FIG00018699 | idu(72);n-<br>Phenylalkanoic_acid_degradation<br>idu(72);Fatty_acid_metabolism_clust<br>er idu(72);Biotin_synthesis_cluster<br>idu(72);Biotin_biosynthesis                                                                                                                                                                                           |
| fig 6666666.28482.peg.4968 | Contig_65 | 45482 | 44409 | - | Luciferase                                                      |             |                                                                                                                                                                                                                                                                                                                                                      |
| fig 6666666.28482.peg.4969 | Contig_65 | 45583 | 46410 | + | hydroxysteroid (17-beta)<br>dehydrogenase 4                     |             |                                                                                                                                                                                                                                                                                                                                                      |
| fig 6666666.28482.peg.4970 | Contig_65 | 46413 | 47051 | + | Transcriptional regulator, TetR family                          | FIG00554417 | ff                                                                                                                                                                                                                                                                                                                                                   |
| fig 6666666.28482.peg.4971 | Contig_65 | 47041 | 47790 | + | 3-oxoacyl-[acyl-carrier<br>protein] reductase (EC<br>1.1.1.100) | FIG00621114 | idu(38);CBSS-246196.1.peg.364<br>idu(38);CBSS-164757.7.peg.5020<br>idu(38);Fatty_Acid_Biosynthesis_FASI<br>I                                                                                                                                                                                                                                         |
| fig 6666666.28482.peg.4972 | Contig_65 | 47861 | 48628 | + | Enoyl-CoA hydratase (EC<br>4.2.1.17)                            | FIG00033206 | icw(2);n-<br>Phenylalkanoic_acid_degradation<br>idu(51);Polyhydroxybutyrate_metabo<br>lism icw(1);Isoleucine_degradation<br>icw(2);Fatty_acid_metabolism_cluste<br>r icw(1);Lysine_fermentation<br>icw(1);Butanol_Biosynthesis<br>icw(1);Acetyl-<br>CoA_fermentation_to_Butyrate<br>icw(1);Valine_degradation<br>idu(51);Butyrate_metabolism_cluster |

|                            |           |       |       |   |                                                                 |             |                                                                                                                                                                                                                                |
|----------------------------|-----------|-------|-------|---|-----------------------------------------------------------------|-------------|--------------------------------------------------------------------------------------------------------------------------------------------------------------------------------------------------------------------------------|
| fig 6666666.28482.peg.4973 | Contig_65 | 48655 | 50295 | + | Long-chain-fatty-acid--<br>CoA ligase (EC 6.2.1.3)              | FIG00018699 | idu(72);n-<br>Phenylalkanoic_acid_degradation<br>idu(72);Fatty_acid_metabolism_clust<br>er idu(72);Biotin_synthesis_cluster<br>idu(72);Biotin_biosynthesis                                                                     |
| fig 6666666.28482.peg.4974 | Contig_65 | 50292 | 50933 | + | hypothetical protein                                            |             |                                                                                                                                                                                                                                |
| fig 6666666.28482.peg.4975 | Contig_65 | 50935 | 52062 | + | Butyryl-CoA<br>dehydrogenase (EC<br>1.3.99.2)                   | FIG00009149 | idu(39);Isoleucine_degradation<br>idu(39);Lysine_fermentation<br>idu(39);Butanol_Biosynthesis<br>idu(39);Acetyl-<br>CoA_fermentation_to_Butyrate<br>idu(39);Valine_degradation<br>idu(39);Anaerobic_respiratory_reduc<br>tases |
| fig 6666666.28482.peg.4976 | Contig_65 | 52865 | 52068 | - | 3-oxoacyl-[acyl-carrier<br>protein] reductase (EC<br>1.1.1.100) | FIG00621114 | idu(38);CBSS-246196.1.peg.364<br>idu(38);CBSS-164757.7.peg.5020<br>idu(38);Fatty_Acid_Biosynthesis_FASI<br>I                                                                                                                   |
| fig 6666666.28482.peg.4977 | Contig_65 | 53033 | 53644 | + | Transcriptional regulator,<br>TetR family                       |             |                                                                                                                                                                                                                                |
| fig 6666666.28482.peg.4978 | Contig_65 | 53744 | 54511 | + | clavaldehyde<br>dehydrogenase                                   |             | idu(1);Clavulanic_acid_biosynthesis                                                                                                                                                                                            |
| fig 6666666.28482.peg.4979 | Contig_65 | 54529 | 55812 | + | hypothetical protein                                            |             |                                                                                                                                                                                                                                |
| fig 6666666.28482.peg.4980 | Contig_65 | 56450 | 55836 | - | Transcriptional regulator,<br>TetR family                       |             |                                                                                                                                                                                                                                |
| fig 6666666.28482.peg.4981 | Contig_65 | 56732 | 57478 | + | short-chain<br>dehydrogenase/reductas<br>e SDR                  |             |                                                                                                                                                                                                                                |
| fig 6666666.28482.peg.4982 | Contig_65 | 57594 | 57926 | + | Protein of unknown<br>function DUF35                            |             |                                                                                                                                                                                                                                |

|                            |           |       |       |   |                                                                |             |                                                                                            |
|----------------------------|-----------|-------|-------|---|----------------------------------------------------------------|-------------|--------------------------------------------------------------------------------------------|
| fig 6666666.28482.peg.4983 | Contig_65 | 57926 | 59101 | + | diterpenoid dioxygenase                                        |             |                                                                                            |
| fig 6666666.28482.peg.4984 | Contig_65 | 59148 | 60020 | + | 3-hydroxyisobutyrate dehydrogenase (EC 1.1.1.31)               | FIG00021583 | idu(3);Valine_degradation                                                                  |
| fig 6666666.28482.rna.46   | Contig_65 | 60385 | 60313 | - | tRNA-Arg-CCT                                                   |             |                                                                                            |
| fig 6666666.28482.peg.4985 | Contig_65 | 61244 | 60426 | - | FIG00824358:                                                   | FIG00824357 | ff                                                                                         |
|                            |           |       |       |   | hypothetical protein                                           |             |                                                                                            |
| fig 6666666.28482.peg.4986 | Contig_65 | 62332 | 61277 | - | FIG00823130:                                                   | FIG00823129 | ff                                                                                         |
|                            |           |       |       |   | hypothetical protein                                           |             |                                                                                            |
| fig 6666666.28482.peg.4987 | Contig_65 | 63985 | 62450 | - | hypothetical protein                                           | FIG00638284 | ff                                                                                         |
| fig 6666666.28482.peg.4988 | Contig_65 | 64301 | 64146 | - | hypothetical protein                                           |             |                                                                                            |
| fig 6666666.28482.peg.4989 | Contig_66 | 1229  | 186   | - | Transcription termination protein NusA                         | FIG00000168 | isu;NusA-TFII_Cluster<br>isu;Transcription_factors_bacterial<br>isu;CBSS-350688.3.peg.1509 |
| fig 6666666.28482.peg.4990 | Contig_66 | 1777  | 1226  | - | COG0779: clustered with transcription termination protein NusA | FIG00000325 | ff                                                                                         |
| fig 6666666.28482.peg.4991 | Contig_66 | 1996  | 2493  | + | PROBABLE CONSERVED TRANSMEMBRANE ALANINE RICH PROTEIN          | FIG01333321 | ff                                                                                         |
| fig 6666666.28482.peg.4992 | Contig_66 | 2507  | 2953  | + | FIG00999285:                                                   | FIG00820360 | ff                                                                                         |
|                            |           |       |       |   | hypothetical protein                                           |             |                                                                                            |
| fig 6666666.28482.peg.4993 | Contig_66 | 4708  | 2960  | - | Prolyl-tRNA synthetase (EC 6.1.1.15)                           | FIG00000069 | ff                                                                                         |
| fig 6666666.28482.peg.4994 | Contig_66 | 4810  | 6048  | + | hypothetical protein                                           |             |                                                                                            |
| fig 6666666.28482.peg.4995 | Contig_66 | 7568  | 6138  | - | EmrB/QacA family drug resistance transporter                   | FIG00997405 | ff                                                                                         |

|                            |           |       |       |   |                                                                                                                                                                                        |             |                                                                                                                                                                                                              |
|----------------------------|-----------|-------|-------|---|----------------------------------------------------------------------------------------------------------------------------------------------------------------------------------------|-------------|--------------------------------------------------------------------------------------------------------------------------------------------------------------------------------------------------------------|
| fig 6666666.28482.peg.4996 | Contig_66 | 8960  | 7764  | - | Siroheme synthase /<br>Precorrin-2 oxidase (EC<br>1.3.1.76) /<br>Sirohydrochlorin<br>ferrochelataase (EC<br>4.99.1.4) /<br>Uroporphyrinogen-III<br>methyltransferase (EC<br>2.1.1.107) | FIG00090522 | idu(1);Dissimilatory_nitrite_reductas<br>e<br>isu;Heme_and_Siroheme_Biosynthesi<br>s<br>isu;Heme_and_Siroheme_Biosynthesi<br>s<br>isu;Heme_and_Siroheme_Biosynthesi<br>s<br>idu(1);Coenzyme_B12_biosynthesis |
| fig 6666666.28482.peg.4997 | Contig_66 | 10406 | 8970  | - | Cobyrinic acid A,C-<br>diamide synthase                                                                                                                                                | FIG00138468 | icw(1);Cobalamin_synthesis<br>icw(3);Coenzyme_B12_biosynthesis                                                                                                                                               |
| fig 6666666.28482.peg.4998 | Contig_66 | 11025 | 10435 | - | Cob(I)alamin<br>adenosyltransferase (EC<br>2.5.1.17)                                                                                                                                   | FIG00000641 | isu;Cobalamin_synthesis<br>icw(2);Coenzyme_B12_biosynthesis                                                                                                                                                  |
| fig 6666666.28482.peg.4999 | Contig_66 | 12892 | 11066 | - | ChII component of cobalt<br>chelataase involved in B12<br>biosynthesis / ChID<br>component of cobalt<br>chelataase involved in B12<br>biosynthesis                                     | FIG00003696 | icw(1);Coenzyme_B12_biosynthesis<br>icw(1);Coenzyme_B12_biosynthesis                                                                                                                                         |
| fig 6666666.28482.peg.5000 | Contig_66 | 13359 | 12889 | - | ElaA protein                                                                                                                                                                           | FIG00139273 | isu;cAMP_signaling_in_bacteria                                                                                                                                                                               |
| fig 6666666.28482.peg.5001 | Contig_66 | 14843 | 13356 | - | Malate:quinone<br>oxidoreductase (EC<br>1.1.5.4)                                                                                                                                       | FIG00000978 | isu;TCA_Cycle                                                                                                                                                                                                |
| fig 6666666.28482.peg.5002 | Contig_66 | 14956 | 15957 | + | Lysophospholipase (EC<br>3.1.1.5)                                                                                                                                                      | FIG00004249 | isu;Triacylglycerol_metabolism                                                                                                                                                                               |
| fig 6666666.28482.peg.5003 | Contig_66 | 15968 | 17362 | + | NADPH-dependent<br>mycothiol reductase Mtr                                                                                                                                             | FIG00023452 | isu;Glutathione_analogs:_mycothiol                                                                                                                                                                           |

|                            |           |       |       |   |                                                                        |                                                                                                                        |
|----------------------------|-----------|-------|-------|---|------------------------------------------------------------------------|------------------------------------------------------------------------------------------------------------------------|
| fig 6666666.28482.peg.5004 | Contig_66 | 17826 | 17350 | - | Transcriptional regulator, FIG00002441                                 | idu(2);Oxidative_stress                                                                                                |
|                            |           |       |       |   | FUR family                                                             |                                                                                                                        |
| fig 6666666.28482.peg.5005 | Contig_66 | 17922 | 19022 | + | HoxN/HupN/NixA family<br>nickel/cobalt transporter                     | FIG00016929 idu(1);Transport_of_Nickel_and_Cobalt                                                                      |
| fig 6666666.28482.peg.5006 | Contig_66 | 19095 | 19805 | + | Adenosylcobinamide<br>amidohydrolase (EC<br>3.5.1.90)                  | FIG00058905 isu;Coenzyme_B12_biosynthesis                                                                              |
| fig 6666666.28482.peg.5007 | Contig_66 | 21565 | 19844 | - | PPE family protein                                                     | idu(57);CBSS-164757.7.peg.5020                                                                                         |
| fig 6666666.28482.peg.5008 | Contig_66 | 21926 | 21804 | - | hypothetical protein                                                   |                                                                                                                        |
| fig 6666666.28482.peg.5009 | Contig_66 | 21925 | 22260 | + | [NiFe] hydrogenase<br>nickel incorporation<br>protein HypA             | FIG00001182 idu(1);NiFe_hydrogenase_maturation<br>icw(1);G3E_family_of_P-<br>loop_GTPases_(metallocenter_biosynthesis) |
| fig 6666666.28482.peg.5010 | Contig_66 | 22289 | 23059 | + | [NiFe] hydrogenase<br>nickel incorporation-<br>associated protein HypB | FIG00001210 icw(1);NiFe_hydrogenase_maturation<br>idu(1);G3E_family_of_P-<br>loop_GTPases_(metallocenter_biosynthesis) |
| fig 6666666.28482.peg.5011 | Contig_66 | 23373 | 24428 | + | Uptake hydrogenase<br>small subunit precursor<br>(EC 1.12.99.6)        | FIG00133578 icw(1);Hydrogenases                                                                                        |
| fig 6666666.28482.peg.5012 | Contig_66 | 24475 | 26274 | + | Uptake hydrogenase<br>large subunit (EC<br>1.12.99.6)                  | FIG00138205 idu(1);Hydrogenases                                                                                        |
| fig 6666666.28482.peg.5013 | Contig_66 | 26278 | 27186 | + | FIG00821991:<br>hypothetical protein                                   | FIG00821990 ff                                                                                                         |
| fig 6666666.28482.peg.5014 | Contig_66 | 27236 | 27883 | + | FIG00823144:<br>hypothetical protein                                   | FIG00823142 ff                                                                                                         |
| fig 6666666.28482.peg.5015 | Contig_66 | 27880 | 28533 | + | FIG00821078:<br>hypothetical protein                                   | FIG00821076 ff                                                                                                         |
| fig 6666666.28482.peg.5016 | Contig_66 | 28530 | 29852 | + | FIG00822393:<br>hypothetical protein                                   | FIG00822392 ff                                                                                                         |

|                            |           |       |       |   |                                                              |             |                                                                                                                |
|----------------------------|-----------|-------|-------|---|--------------------------------------------------------------|-------------|----------------------------------------------------------------------------------------------------------------|
| fig 6666666.28482.peg.5017 | Contig_66 | 29865 | 29984 | + | hypothetical protein                                         | FIG00638284 | ff                                                                                                             |
| fig 6666666.28482.peg.5018 | Contig_66 | 30001 | 30489 | + | Hydrogenase maturation<br>protease (EC 3.4.24.-)             | FIG00621884 | idu(1);Coenzyme_F420_hydrogenase<br>idu(1);Hydrogen-<br>sensing_regulatory_system                              |
| fig 6666666.28482.peg.5019 | Contig_66 | 30517 | 30759 | + | Hydrogenase assembly<br>chaperone HypC/HupF                  | FIG00821018 | ff                                                                                                             |
| fig 6666666.28482.peg.5020 | Contig_66 | 30779 | 33085 | + | [NiFe] hydrogenase<br>metallocenter assembly<br>protein HypF | FIG00001209 | idu(1);NiFe_hydrogenase_maturation<br>icw(2);G3E_family_of_P-<br>loop_GTPases_(metallocenter_biosyn<br>thesis) |
| fig 6666666.28482.peg.5021 | Contig_66 | 33087 | 33797 | + | FIG00823788:<br>hypothetical protein                         | FIG00823787 | ff                                                                                                             |
| fig 6666666.28482.peg.5022 | Contig_66 | 33797 | 34465 | + | Phosphoheptose<br>isomerase 1 (EC 5.3.1.-)                   | FIG00002799 | idu(2);LOS_core_oligosaccharide_bio<br>synthesis<br>idu(2);Capsular_heptose_biosynthesi<br>s                   |
| fig 6666666.28482.peg.5023 | Contig_66 | 34462 | 35574 | + | [NiFe] hydrogenase<br>metallocenter assembly<br>protein HypE | FIG00003378 | icw(3);NiFe_hydrogenase_maturation<br>icw(1);G3E_family_of_P-<br>loop_GTPases_(metallocenter_biosyn<br>thesis) |
| fig 6666666.28482.peg.5024 | Contig_66 | 35590 | 35862 | + | [NiFe] hydrogenase<br>metallocenter assembly<br>protein HypC | FIG00003908 | icw(1);NiFe_hydrogenase_maturation<br>icw(3);G3E_family_of_P-<br>loop_GTPases_(metallocenter_biosyn<br>thesis) |
| fig 6666666.28482.peg.5025 | Contig_66 | 35874 | 37013 | + | [NiFe] hydrogenase<br>metallocenter assembly<br>protein HypD | FIG00001208 | icw(2);NiFe_hydrogenase_maturation<br>idu(1);G3E_family_of_P-<br>loop_GTPases_(metallocenter_biosyn<br>thesis) |
| fig 6666666.28482.peg.5026 | Contig_66 | 37010 | 37753 | + | FIG00826825:<br>hypothetical protein                         | FIG00826822 | ff                                                                                                             |
| fig 6666666.28482.peg.5027 | Contig_66 | 37803 | 38447 | + | hypothetical protein                                         |             |                                                                                                                |

|                            |           |       |       |   |                                                                                                         |             |                                                                                                 |
|----------------------------|-----------|-------|-------|---|---------------------------------------------------------------------------------------------------------|-------------|-------------------------------------------------------------------------------------------------|
| fig 6666666.28482.peg.5028 | Contig_66 | 38475 | 39587 | + | FIG00825760:<br>hypothetical protein                                                                    | FIG01569761 | ff                                                                                              |
| fig 6666666.28482.peg.5029 | Contig_66 | 40183 | 41025 | + | PPE family protein                                                                                      | FIG00013075 | idu(57);CBSS-164757.7.peg.5020                                                                  |
| fig 6666666.28482.peg.5030 | Contig_66 | 41785 | 41012 | - | Short-chain<br>dehydrogenase/reductase in hypothetical<br>Actinobacterial gene cluster                  | FIG00023196 | isu;CBSS-262316.1.peg.2929                                                                      |
| fig 6666666.28482.peg.5031 | Contig_66 | 43152 | 41785 | - | Aldehyde dehydrogenase in hypothetical<br>Actinobacterial gene cluster                                  | FIG00146356 | icw(3);CBSS-262316.1.peg.2929                                                                   |
| fig 6666666.28482.peg.5032 | Contig_66 | 43871 | 43149 | - | COG2071: predicted<br>glutamine<br>amidotransferases in<br>hypothetical<br>Actinobacterial gene cluster | FIG00146363 | icw(1);CBSS-262316.1.peg.2929                                                                   |
| fig 6666666.28482.peg.5033 | Contig_66 | 45210 | 43858 | - | Glutamine synthetase family protein in<br>hypothetical<br>Actinobacterial gene cluster                  | FIG00143561 | isu;Glutamine,_Glutamate,_Aspartate_and_Aspargine_Biosynthesis<br>icw(2);CBSS-262316.1.peg.2929 |
| fig 6666666.28482.peg.5034 | Contig_66 | 45782 | 45222 | - | FIG00822818:<br>hypothetical protein                                                                    | FIG00822817 | ff                                                                                              |
| fig 6666666.28482.peg.5035 | Contig_66 | 47329 | 45833 | - | Cobyrinic acid synthase                                                                                 | FIG00000530 | isu;Cobalamin_synthesis<br>isu;Coenzyme_B12_biosynthesis                                        |
| fig 6666666.28482.peg.5036 | Contig_66 | 48206 | 47400 | - | Methionine<br>aminopeptidase (EC<br>3.4.11.18)                                                          | FIG00000036 | idu(1);CBSS-312309.3.peg.1965<br>idu(1);Translation_termination_factors_bacterial               |

|                            |           |       |       |   |                                                                       |             |                                                                                                                                                                                                         |
|----------------------------|-----------|-------|-------|---|-----------------------------------------------------------------------|-------------|---------------------------------------------------------------------------------------------------------------------------------------------------------------------------------------------------------|
| fig 6666666.28482.peg.5037 | Contig_66 | 48449 | 49516 | + | nuclear receptor binding factor related protein                       | FIG01002080 | ff                                                                                                                                                                                                      |
| fig 6666666.28482.peg.5038 | Contig_66 | 50185 | 49511 | - | DNA-binding protein                                                   |             |                                                                                                                                                                                                         |
| fig 6666666.28482.peg.5039 | Contig_66 | 50451 | 50909 | + | hypothetical protein                                                  |             |                                                                                                                                                                                                         |
| fig 6666666.28482.peg.5040 | Contig_66 | 50951 | 51919 | + | dehydrogenase                                                         |             |                                                                                                                                                                                                         |
| fig 6666666.28482.peg.5041 | Contig_66 | 52623 | 52039 | - | FIG020268: hypothetical protein                                       | FIG01349205 | ff                                                                                                                                                                                                      |
| fig 6666666.28482.peg.5042 | Contig_66 | 54521 | 52668 | - | Cell division protein FtsI [Peptidoglycan synthetase] (EC 2.4.1.129)  | FIG00046929 | idu(2);Bacterial_Cell_Division<br>idu(2);16S_rRNA_modification_withi<br>n_P_site_of_ribosome<br>idu(2);Flagellum_in_Campylobacter<br>idu(2);Bacterial_Cytoskeleton<br>idu(2);Peptidoglycan_Biosynthesis |
| fig 6666666.28482.peg.5043 | Contig_66 | 55493 | 54639 | - | GCN5-related N-acetyltransferase, FIGfam019367                        | FIG00019367 | ff                                                                                                                                                                                                      |
| fig 6666666.28482.peg.5044 | Contig_66 | 56713 | 55556 | - | 1-hydroxy-2-methyl-2-(E)-butenyl 4-diphosphate synthase (EC 1.17.7.1) | FIG00000449 | icw(2);Nonmevalonate_Branch_of_Is<br>oprenoid_Biosynthesis<br>icw(2);Isoprenoid_Biosynthesis                                                                                                            |
| fig 6666666.28482.peg.5045 | Contig_66 | 57933 | 56710 | - | Membrane-associated zinc metalloprotease                              | FIG00002803 | ff                                                                                                                                                                                                      |
| fig 6666666.28482.peg.5046 | Contig_66 | 59063 | 57930 | - | 1-deoxy-D-xylulose 5-phosphate reductoisomerase (EC 1.1.1.267)        | FIG00000401 | icw(1);Nonmevalonate_Branch_of_Is<br>oprenoid_Biosynthesis<br>icw(1);Isoprenoid_Biosynthesis                                                                                                            |
| fig 6666666.28482.peg.5047 | Contig_66 | 60291 | 59164 | - | 1-deoxy-D-xylulose 5-phosphate reductoisomerase (EC 1.1.1.267)        | FIG00000401 | icw(1);Nonmevalonate_Branch_of_Is<br>oprenoid_Biosynthesis<br>icw(1);Isoprenoid_Biosynthesis                                                                                                            |

|                            |           |       |       |   |                                                              |             |                                                                              |
|----------------------------|-----------|-------|-------|---|--------------------------------------------------------------|-------------|------------------------------------------------------------------------------|
| fig 6666666.28482.peg.5048 | Contig_66 | 60799 | 60296 | - | Soluble secreted antigen MPT53 precursor                     | FIG01347939 | ff                                                                           |
| fig 6666666.28482.peg.5049 | Contig_66 | 62063 | 60969 | - | Ribosomal RNA large subunit methyltransferase N (EC 2.1.1.-) | FIG00000293 | isu;RNA_methylation                                                          |
| fig 6666666.28482.peg.5050 | Contig_66 | 63070 | 62141 | - | Phosphatidate cytidylyltransferase (EC 2.7.7.41)             | FIG00000097 | idu(1);Glycerolipid_and_Glycerophospholipid_Metabolism_in_Bacteria           |
| fig 6666666.28482.peg.5051 | Contig_66 | 63644 | 63087 | - | Ribosome recycling factor                                    | FIG00000202 | isu;CBSS-176299.4.peg.1996B<br>isu;Translation_termination_factors_bacterial |
| fig 6666666.28482.peg.5052 | Contig_66 | 64410 | 63661 | - | Uridylate kinase (EC 2.7.4.-)                                | FIG00001819 | icw(1);CBSS-176299.4.peg.1996B<br>isu;CBSS-312309.3.peg.1965                 |
| fig 6666666.28482.peg.5053 | Contig_66 | 64713 | 64949 | + | FIG00826147: hypothetical protein                            | FIG01384975 | ff                                                                           |
| fig 6666666.28482.peg.5054 | Contig_66 | 65116 | 65895 | + | Transcriptional regulatory protein glnR                      | FIG01335353 | ff                                                                           |
| fig 6666666.28482.peg.5055 | Contig_66 | 66795 | 65929 | - | FIG00824661: hypothetical protein                            | FIG00824660 | ff                                                                           |
| fig 6666666.28482.peg.5056 | Contig_66 | 67543 | 66959 | - | FIG00826478: hypothetical protein                            | FIG00826477 | ff                                                                           |
| fig 6666666.28482.peg.5057 | Contig_66 | 67736 | 67912 | + | FIG00828846: hypothetical protein                            | FIG00828845 | ff                                                                           |
| fig 6666666.28482.peg.5058 | Contig_66 | 67945 | 68784 | + | Enoyl-[acyl-carrier-protein] reductase [NADPH] (EC 1.3.1.10) | FIG00032108 | idu(2);Fatty_Acid_Biosynthesis_FASII                                         |
| fig 6666666.28482.peg.5059 | Contig_66 | 69024 | 68797 | - | hypothetical protein                                         |             |                                                                              |
| fig 6666666.28482.peg.5060 | Contig_66 | 69530 | 69117 | - | FIG00822516: hypothetical protein                            | FIG00822515 | ff                                                                           |

|                            |           |       |       |   |                                                          |             |                                                                                                                      |
|----------------------------|-----------|-------|-------|---|----------------------------------------------------------|-------------|----------------------------------------------------------------------------------------------------------------------|
| fig 6666666.28482.peg.5061 | Contig_66 | 70081 | 69545 | - | FIG00823334:<br>hypothetical protein                     | FIG00823333 | ff                                                                                                                   |
| fig 6666666.28482.peg.5062 | Contig_66 | 70080 | 70601 | + | Transcriptional regulator,<br>MarR family                | FIG00554610 | ff                                                                                                                   |
| fig 6666666.28482.peg.5063 | Contig_66 | 72016 | 70604 | - | Putative amidase amiC<br>(EC 3.5.1.4)                    | FIG01313765 | ff                                                                                                                   |
| fig 6666666.28482.peg.5064 | Contig_66 | 72865 | 72047 | - | Translation elongation<br>factor Ts                      | FIG00000191 | icw(1);CBSS-176299.4.peg.1996B<br>isu;Translation_elongation_factors_b<br>acterial icw(1);CBSS-<br>312309.3.peg.1965 |
| fig 6666666.28482.peg.5065 | Contig_66 | 73721 | 72876 | - | SSU ribosomal protein<br>S2p (SAe)                       | FIG00037273 | isu;CBSS-176299.4.peg.1996B<br>isu;CBSS-312309.3.peg.1965                                                            |
| fig 6666666.28482.peg.5066 | Contig_66 | 73963 | 74445 | + | Membrane proteins<br>related to<br>metalloendopeptidases | FIG00011382 | ff                                                                                                                   |
| fig 6666666.28482.peg.5067 | Contig_66 | 75635 | 74733 | - | Tyrosine recombinase<br>XerC                             | FIG00600726 | isu;CBSS-323850.3.peg.3269                                                                                           |
| fig 6666666.28482.peg.5068 | Contig_66 | 76831 | 75668 | - | Lactate 2-<br>monooxygenase (EC<br>1.13.12.4)            | FIG00007876 | isu;Pyruvate_metabolism_II:_acetyl-<br>CoA,_acetogenesis_from_pyruvate                                               |
| fig 6666666.28482.peg.5069 | Contig_66 | 77684 | 76836 | - | Iron utilization protein                                 | FIG00997350 | ff                                                                                                                   |
| fig 6666666.28482.peg.5070 | Contig_66 | 77757 | 78608 | + | Transcriptional regulator,<br>IclR family                | FIG00022569 | idu(12);Homogentisate_pathway_of_<br>aromatic_compound_degradation                                                   |
| fig 6666666.28482.peg.5071 | Contig_66 | 79832 | 78624 | - | PPE family protein                                       | FIG00013075 | icw(1);CBSS-164757.7.peg.5020                                                                                        |
| fig 6666666.28482.peg.5072 | Contig_66 | 80051 | 79839 | - | PE family protein                                        | FIG01311212 | ff                                                                                                                   |
| fig 6666666.28482.peg.5073 | Contig_66 | 81290 | 80202 | - | PPE family protein                                       | FIG00013075 | icw(1);CBSS-164757.7.peg.5020                                                                                        |
| fig 6666666.28482.peg.5074 | Contig_66 | 82632 | 81325 | - | Major facilitator<br>superfamily (MFS_1)<br>transporter  |             |                                                                                                                      |

|                            |           |       |       |   |                                                                                      |             |                                                                               |
|----------------------------|-----------|-------|-------|---|--------------------------------------------------------------------------------------|-------------|-------------------------------------------------------------------------------|
| fig 6666666.28482.peg.5075 | Contig_66 | 82859 | 84079 | + | L-carnitine dehydratase/bile acid-inducible protein F (EC 2.8.3.16)                  | FIG00450481 | ff                                                                            |
| fig 6666666.28482.peg.5076 | Contig_66 | 84076 | 85008 | + | Hydroxymethylglutaryl-CoA lyase (EC 4.1.3.4)                                         | FIG00000963 | idu(2);HMG_CoA_Synthesis<br>idu(2);Leucine_Degradation_and_HMG-CoA_Metabolism |
| fig 6666666.28482.peg.5077 | Contig_66 | 86142 | 85015 | - | Rossmann fold nucleotide-binding protein Smf possibly involved in DNA uptake         | FIG00035268 | isu;CBSS-272943.3.peg.1367                                                    |
| fig 6666666.28482.peg.5078 | Contig_66 | 87650 | 86139 | - | MG(2+) CHELATASE FAMILY PROTEIN / ComM-related protein                               | FIG00000635 | ff                                                                            |
| fig 6666666.28482.peg.5079 | Contig_66 | 88027 | 87650 | - | Predicted endonuclease distantly related to archaeal Holliday junction resolvase     | FIG00009496 | ff                                                                            |
| fig 6666666.28482.peg.5080 | Contig_66 | 88315 | 88142 | - | hypothetical protein                                                                 |             |                                                                               |
| fig 6666666.28482.peg.5081 | Contig_66 | 89135 | 88320 | - | Formate dehydrogenase chain D (EC 1.2.1.2)                                           | FIG00000529 | isu;Formate_hydrogenase                                                       |
| fig 6666666.28482.peg.5082 | Contig_66 | 90222 | 89161 | - | FIG00823170: hypothetical protein                                                    | FIG00823168 | ff                                                                            |
| fig 6666666.28482.peg.5083 | Contig_66 | 90243 | 90983 | + | FIG00827258: hypothetical protein                                                    | FIG00827257 | ff                                                                            |
| fig 6666666.28482.peg.5084 | Contig_66 | 91295 | 90990 | - | Protein often found in Actinomycetes clustered with signal peptidase and/or RNaseHII | FIG00004032 | icw(1);Ribonuclease_H                                                         |

|                            |           |       |       |   |                                                       |             |                                                                                      |
|----------------------------|-----------|-------|-------|---|-------------------------------------------------------|-------------|--------------------------------------------------------------------------------------|
| fig 6666666.28482.peg.5085 | Contig_66 | 92073 | 91345 | - | Ribonuclease HII (EC 3.1.26.4)                        | FIG00000126 | isu;Ribonucleases_in_Bacillus<br>isu;DNA_replication,_archaeal<br>isu;Ribonuclease_H |
| fig 6666666.28482.peg.5086 | Contig_66 | 92936 | 92076 | - | Signal peptidase I (EC 3.4.21.89)                     | FIG00000015 | isu;Signal_peptidase                                                                 |
| fig 6666666.28482.peg.5087 | Contig_66 | 93335 | 92994 | - | LSU ribosomal protein L19p                            | FIG00000214 | isu;Ribosome_LSU_bacterial                                                           |
| fig 6666666.28482.peg.5088 | Contig_66 | 93645 | 94601 | + | Putative lipoprotein lppW precursor                   | FIG01328011 | ff                                                                                   |
| fig 6666666.28482.peg.5089 | Contig_66 | 95373 | 94687 | - | tRNA (Guanine37-N1) - methyltransferase (EC 2.1.1.31) | FIG00000230 | isu;RNA_methylation                                                                  |
| fig 6666666.28482.peg.5090 | Contig_66 | 95885 | 95391 | - | 16S rRNA processing protein RimM                      | FIG00000312 | isu;KH_domain_RNA_binding_protein_YlqC                                               |
| fig 6666666.28482.peg.5091 | Contig_66 | 96161 | 95919 | - | KH domain RNA binding protein YlqC                    | FIG00005628 | icw(1);KH_domain_RNA_binding_protein_YlqC                                            |
| fig 6666666.28482.peg.5092 | Contig_67 | 6     | 815   | + | hypothetical protein                                  |             |                                                                                      |
| fig 6666666.28482.peg.5093 | Contig_67 | 998   | 1564  | + | Dihydrofolate reductase (EC 1.5.1.3)                  | FIG00000048 | idu(3);Folate_Biosynthesis                                                           |
| fig 6666666.28482.peg.5094 | Contig_67 | 1677  | 2495  | + | Non-heme chloroperoxidase (EC 1.11.1.10)              | FIG01225742 | ff                                                                                   |
| fig 6666666.28482.peg.5095 | Contig_67 | 2754  | 2518  | - | hypothetical protein                                  |             |                                                                                      |
| fig 6666666.28482.peg.5096 | Contig_67 | 3603  | 3746  | + | hypothetical protein                                  |             |                                                                                      |
| fig 6666666.28482.peg.5097 | Contig_67 | 5212  | 4067  | - | diguanylate cyclase                                   |             |                                                                                      |
| fig 6666666.28482.peg.5098 | Contig_67 | 5957  | 5493  | - | hypothetical protein                                  | FIG00638284 | ff                                                                                   |
| fig 6666666.28482.peg.5099 | Contig_67 | 7065  | 6121  | - | hypothetical protein                                  | FIG00638284 | ff                                                                                   |
| fig 6666666.28482.peg.5100 | Contig_67 | 7259  | 7726  | + | hypothetical protein                                  |             |                                                                                      |
| fig 6666666.28482.peg.5101 | Contig_67 | 7878  | 8288  | + | hypothetical protein                                  |             |                                                                                      |
| fig 6666666.28482.peg.5102 | Contig_67 | 8504  | 9985  | + | POSSIBLE CARBOXYLASE                                  | FIG00841937 | ff                                                                                   |
| fig 6666666.28482.peg.5103 | Contig_67 | 9982  | 11175 | + | 6-aminohexanoate-dimer hydrolase                      | FIG01513469 | ff                                                                                   |

|                            |           |       |       |   |                                                                                   |             |                                                |
|----------------------------|-----------|-------|-------|---|-----------------------------------------------------------------------------------|-------------|------------------------------------------------|
| fig 6666666.28482.peg.5104 | Contig_67 | 11305 | 11159 | - | hypothetical protein                                                              |             |                                                |
| fig 6666666.28482.peg.5105 | Contig_67 | 11586 | 11831 | + | hypothetical protein                                                              |             |                                                |
| fig 6666666.28482.peg.5106 | Contig_67 | 11786 | 12439 | + | FIG00831057:                                                                      | FIG00831056 | ff                                             |
|                            |           |       |       |   | hypothetical protein                                                              |             |                                                |
| fig 6666666.28482.peg.5107 | Contig_67 | 12550 | 12753 | + | Cold shock protein CspA                                                           | FIG00004100 | idu(1);Cold_shock,_CspA_family_of_p<br>roteins |
| fig 6666666.28482.peg.5108 | Contig_67 | 13063 | 12833 | - | FIG00827556:                                                                      | FIG00827551 | ff                                             |
|                            |           |       |       |   | hypothetical protein                                                              |             |                                                |
| fig 6666666.28482.peg.5109 | Contig_67 | 13093 | 14019 | + | Probable carboxyvinyl-<br>carboxyphosphonate<br>phosphorylmutase (EC<br>2.7.8.23) | FIG00012387 | ff                                             |
| fig 6666666.28482.peg.5110 | Contig_67 | 14510 | 14367 | - | hypothetical protein                                                              |             |                                                |
| fig 6666666.28482.peg.5111 | Contig_67 | 15152 | 14760 | - | FIG00829547:                                                                      | FIG00829546 | ff                                             |
|                            |           |       |       |   | hypothetical protein                                                              |             |                                                |
| fig 6666666.28482.peg.5112 | Contig_67 | 15255 | 15704 | + | hypothetical protein                                                              |             |                                                |
| fig 6666666.28482.peg.5113 | Contig_67 | 15813 | 16658 | + | oxidoreductase                                                                    |             |                                                |
| fig 6666666.28482.peg.5114 | Contig_67 | 16786 | 17484 | + | hypothetical protein                                                              | FIG00638284 | ff                                             |
| fig 6666666.28482.peg.5115 | Contig_67 | 17481 | 17957 | + | hypothetical protein                                                              |             |                                                |
| fig 6666666.28482.peg.5116 | Contig_67 | 18213 | 19301 | + | Sensory box/GGDEF<br>family protein                                               | FIG01325709 | ff                                             |
| fig 6666666.28482.peg.5117 | Contig_67 | 19623 | 22181 | + | regulatory protein, LuxR                                                          |             |                                                |
| fig 6666666.28482.peg.5118 | Contig_67 | 22216 | 22539 | + | hypothetical protein                                                              |             |                                                |
| fig 6666666.28482.peg.5119 | Contig_67 | 22710 | 23816 | + | FIG00827948:                                                                      | FIG00827946 | ff                                             |
|                            |           |       |       |   | hypothetical protein                                                              |             |                                                |
| fig 6666666.28482.peg.5120 | Contig_67 | 24275 | 23835 | - | hypothetical protein                                                              |             |                                                |
| fig 6666666.28482.peg.5121 | Contig_68 | 245   | 394   | + | hypothetical protein                                                              |             |                                                |
| fig 6666666.28482.peg.5122 | Contig_68 | 3740  | 3856  | + | hypothetical protein                                                              |             |                                                |
| fig 6666666.28482.peg.5123 | Contig_68 | 3887  | 4087  | + | hypothetical protein                                                              |             |                                                |
| fig 6666666.28482.peg.5124 | Contig_68 | 7329  | 7574  | + | FIG00828124:                                                                      | FIG00828123 | ff                                             |
|                            |           |       |       |   | hypothetical protein                                                              |             |                                                |
| fig 6666666.28482.peg.5125 | Contig_68 | 7963  | 7628  | - | hypothetical protein                                                              |             |                                                |

|                            |           |       |       |   |                                                                                                  |             |                                                               |
|----------------------------|-----------|-------|-------|---|--------------------------------------------------------------------------------------------------|-------------|---------------------------------------------------------------|
| fig 6666666.28482.peg.5126 | Contig_68 | 8329  | 8021  | - | fdxD-related protein                                                                             | FIG01419919 | ff                                                            |
| fig 6666666.28482.peg.5127 | Contig_68 | 9606  | 8326  | - | NADH-quinone<br>oxidoreductase chain F 2<br>(EC 1.6.99.5);<br>Hypothetical FeS<br>oxidoreductase | FIG00087063 | idu(1);Respiratory_Complex_I                                  |
| fig 6666666.28482.peg.5128 | Contig_68 | 9665  | 10111 | + | FIG00824538:<br>hypothetical protein                                                             | FIG00824535 | ff                                                            |
| fig 6666666.28482.peg.5129 | Contig_68 | 10983 | 10117 | - | FIG00820694:<br>hypothetical protein                                                             | FIG00820693 | ff                                                            |
| fig 6666666.28482.peg.5130 | Contig_68 | 11327 | 10995 | - | Rieske (2Fe-2S) domain-<br>containing protein                                                    | FIG01358726 | ff                                                            |
| fig 6666666.28482.peg.5131 | Contig_68 | 12555 | 11410 | - | Amidohydrolase 2                                                                                 | FIG00821472 | ff                                                            |
| fig 6666666.28482.peg.5132 | Contig_68 | 13684 | 12593 | - | FIG00821228:<br>hypothetical protein                                                             | FIG01354128 | ff                                                            |
| fig 6666666.28482.peg.5133 | Contig_68 | 13964 | 14605 | + | hypothetical protein                                                                             |             |                                                               |
| fig 6666666.28482.peg.5134 | Contig_68 | 15653 | 14751 | - | FIG00821205:<br>hypothetical protein                                                             | FIG00821204 | ff                                                            |
| fig 6666666.28482.peg.5135 | Contig_68 | 16043 | 15663 | - | 4-carboxymuconolactone<br>decarboxylase (EC<br>4.1.1.44)                                         | FIG01304850 | idu(2);Protocatechuate_branch_of_b<br>eta-ketoadipate_pathway |
| fig 6666666.28482.peg.5136 | Contig_68 | 16126 | 16776 | + | nitroreductase family<br>protein                                                                 | FIG01312078 | ff                                                            |
| fig 6666666.28482.peg.5137 | Contig_68 | 16873 | 17871 | + | FIG00821611:<br>hypothetical protein                                                             | FIG00821610 | ff                                                            |
| fig 6666666.28482.peg.5138 | Contig_68 | 17855 | 19030 | + | Acyl-CoA dehydrogenase<br>(EC 1.3.99.-)                                                          | FIG01333225 | ff                                                            |
| fig 6666666.28482.peg.5139 | Contig_68 | 20534 | 19116 | - | FIG00824695:<br>hypothetical protein                                                             | FIG01366795 | ff                                                            |

|                            |           |       |       |   |                                                            |             |                                                                                                                                                                                   |
|----------------------------|-----------|-------|-------|---|------------------------------------------------------------|-------------|-----------------------------------------------------------------------------------------------------------------------------------------------------------------------------------|
| fig 6666666.28482.peg.5140 | Contig_68 | 22097 | 20721 | - | putative cytochrome P450 hydroxylase                       | FIG00032437 | idu(49);Nitric_oxide_synthase                                                                                                                                                     |
| fig 6666666.28482.peg.5141 | Contig_68 | 22312 | 22112 | - | fdxD-related protein                                       | FIG01419919 | ff                                                                                                                                                                                |
| fig 6666666.28482.peg.5142 | Contig_68 | 23209 | 22334 | - | Oxidoreductase, short-chain dehydrogenase/reductase family | FIG00822532 | ff                                                                                                                                                                                |
| fig 6666666.28482.peg.5143 | Contig_68 | 23934 | 23233 | - | 3-oxoacyl-[acyl-carrier protein] reductase (EC 1.1.1.100)  | FIG00621114 | idu(38);CBSS-246196.1.peg.364<br>idu(38);CBSS-164757.7.peg.5020<br>idu(38);Fatty_Acid_Biosynthesis_FASII                                                                          |
| fig 6666666.28482.peg.5144 | Contig_68 | 24222 | 25715 | + | Aldehyde dehydrogenase (EC 1.2.1.3)                        | FIG01292786 | idu(16);Pyruvate_metabolism_II:_acetyl-CoA,_acetogenesis_from_pyruvate<br>idu(16);Glycerolipid_and_Glycerophospholipid_Metabolism_in_Bacteria<br>idu(16);Methylglyoxal_Metabolism |
| fig 6666666.28482.peg.5145 | Contig_68 | 25712 | 26917 | + | L-carnitine dehydratase/bile acid-inducible protein F      | FIG01318850 | ff                                                                                                                                                                                |
| fig 6666666.28482.peg.5146 | Contig_68 | 27150 | 27275 | + | hypothetical protein                                       |             |                                                                                                                                                                                   |
| fig 6666666.28482.peg.5147 | Contig_68 | 27350 | 28099 | + | Conserved hypothetical integral membrane protein YrbE1A    | FIG00690583 | idu(7);Mycobacterium_virulence_operon_MCE_involved_in_cell_invasion                                                                                                               |
| fig 6666666.28482.peg.5148 | Contig_68 | 28119 | 28967 | + | Conserved hypothetical integral membrane protein YrbE1B    | FIG00691621 | icw(2);Mycobacterium_virulence_operon_MCE_involved_in_cell_invasion                                                                                                               |

|                            |           |       |       |   |                                                                                          |             |                                                                                           |
|----------------------------|-----------|-------|-------|---|------------------------------------------------------------------------------------------|-------------|-------------------------------------------------------------------------------------------|
| fig 6666666.28482.peg.5149 | Contig_68 | 28987 | 30264 | + | MCE-family protein Mce1A                                                                 | FIG00820494 | icw(1);Mycobacterium_virulence_op<br>eron_MCE_involved_in_cell_invasion                   |
| fig 6666666.28482.peg.5150 | Contig_68 | 30261 | 31301 | + | MCE-family protein Mce1B                                                                 | FIG00763551 | icw(3);Mycobacterium_virulence_op<br>eron_MCE_involved_in_cell_invasion                   |
| fig 6666666.28482.peg.5151 | Contig_68 | 31294 | 32376 | + | MCE-family protein Mce1C                                                                 | FIG00821293 | icw(4);Mycobacterium_virulence_op<br>eron_MCE_involved_in_cell_invasion                   |
| fig 6666666.28482.peg.5152 | Contig_69 | 121   | 1044  | + | hypothetical protein                                                                     |             |                                                                                           |
| fig 6666666.28482.peg.5153 | Contig_69 | 1037  | 1906  | + | similar to nucleoside-<br>diphosphate-sugar<br>epimerases                                |             |                                                                                           |
| fig 6666666.28482.peg.5154 | Contig_69 | 1912  | 2217  | + | conserved hypothetical<br>protein                                                        |             |                                                                                           |
| fig 6666666.28482.peg.5155 | Contig_69 | 2267  | 3007  | + | hypothetical protein                                                                     | FIG00638284 | ff                                                                                        |
| fig 6666666.28482.peg.5156 | Contig_69 | 2991  | 3959  | + | sigma factor, sigma 70<br>type, group 4 (ECF)                                            |             |                                                                                           |
| fig 6666666.28482.peg.5157 | Contig_69 | 3956  | 4390  | + | hypothetical protein                                                                     |             |                                                                                           |
| fig 6666666.28482.peg.5158 | Contig_69 | 4673  | 6256  | + | L-lactate permease                                                                       | FIG00016061 | idu(1);Lactate_utilization                                                                |
| fig 6666666.28482.peg.5159 | Contig_69 | 6348  | 7034  | + | FIG00829569:<br>hypothetical protein                                                     | FIG00829556 | ff                                                                                        |
| fig 6666666.28482.peg.5160 | Contig_69 | 8099  | 7059  | - | hypothetical protein                                                                     | FIG00638284 | ff                                                                                        |
| fig 6666666.28482.peg.5161 | Contig_69 | 9084  | 8302  | - | D-beta-hydroxybutyrate<br>dehydrogenase (EC<br>1.1.1.30)                                 | FIG01954109 | isu;Polyhydroxybutyrate_metabolism                                                        |
| fig 6666666.28482.peg.5162 | Contig_69 | 9424  | 9089  | - | Anti-sigma F factor<br>antagonist (spolIAB-2);<br>Anti-sigma B factor<br>antagonist RsbV | FIG00828677 | icw(1);SigmaB_stress_responce_regul<br>ation icw(1);Sigma-<br>B_stress_response_cluster_1 |

|                            |           |       |       |   |                                                           |             |                                                                                                                                                                                               |
|----------------------------|-----------|-------|-------|---|-----------------------------------------------------------|-------------|-----------------------------------------------------------------------------------------------------------------------------------------------------------------------------------------------|
| fig 6666666.28482.peg.5163 | Contig_69 | 11937 | 9406  | - | Serine phosphatase<br>RsbU, regulator of sigma<br>subunit | FIG00017431 | idu(4);SigmaB_stress_responce_regul<br>ation idu(4);Sigma-<br>B_stress_response_cluster_1                                                                                                     |
| fig 6666666.28482.peg.5164 | Contig_69 | 12874 | 11948 | - | probable iron-sulfur<br>binding protein YPO1417           | FIG01478501 | ff                                                                                                                                                                                            |
| fig 6666666.28482.peg.5165 | Contig_69 | 13812 | 12871 | - | Aldehyde reductase(<br>EC:1.1.1.21 )                      |             |                                                                                                                                                                                               |
| fig 6666666.28482.peg.5166 | Contig_69 | 14549 | 13791 | - | Isochorismatase (EC<br>3.3.2.1)                           | FIG00009017 | idu(3);Chorismate:_Intermediate_for<br>_synthesis_of_Tryptophan,_PAPA_an<br>tibiotics,_PABA,_3-<br>hydroxyanthranilate_and_more.                                                              |
| fig 6666666.28482.peg.5167 | Contig_69 | 15228 | 14656 | - | Transcriptional regulator,<br>TetR family                 |             |                                                                                                                                                                                               |
| fig 6666666.28482.peg.5168 | Contig_69 | 15325 | 15771 | + | FIG00823608:<br>hypothetical protein                      | FIG00823607 | ff                                                                                                                                                                                            |
| fig 6666666.28482.peg.5169 | Contig_69 | 15974 | 16402 | + | membrane protein,<br>MmpS family                          | FIG01309473 | ff                                                                                                                                                                                            |
| fig 6666666.28482.peg.5170 | Contig_69 | 16450 | 19242 | + | Putative membrane<br>protein                              | FIG01056920 | ff                                                                                                                                                                                            |
| fig 6666666.28482.peg.5171 | Contig_69 | 20707 | 19274 | - | FIG00827739:<br>hypothetical protein                      | FIG00827738 | ff                                                                                                                                                                                            |
| fig 6666666.28482.peg.5172 | Contig_69 | 20684 | 20833 | + | hypothetical protein                                      |             |                                                                                                                                                                                               |
| fig 6666666.28482.peg.5173 | Contig_69 | 20876 | 22432 | + | Aldehyde dehydrogenase<br>(EC 1.2.1.3)                    | FIG01292786 | idu(16);Pyruvate_metabolism_II:_ace<br>tyl-<br>CoA,_acetogenesis_from_pyruvate<br>idu(16);Glycerolipid_and_Glyceropho<br>spholipid_Metabolism_in_Bacteria<br>idu(16);Methylglyoxal_Metabolism |

|                            |           |       |       |   |                                                |             |                                                                                                                   |
|----------------------------|-----------|-------|-------|---|------------------------------------------------|-------------|-------------------------------------------------------------------------------------------------------------------|
| fig 6666666.28482.peg.5174 | Contig_69 | 22604 | 23038 | + | FIG00823693:<br>hypothetical protein           | FIG00823691 | ff                                                                                                                |
| fig 6666666.28482.peg.5175 | Contig_69 | 23121 | 23501 | + | hypothetical protein                           |             |                                                                                                                   |
| fig 6666666.28482.peg.5176 | Contig_69 | 24214 | 23486 | - | Sulfotransferase                               |             |                                                                                                                   |
| fig 6666666.28482.peg.5177 | Contig_69 | 24377 | 26521 | + | putative<br>serine/threonine protein<br>kinase |             |                                                                                                                   |
| fig 6666666.28482.peg.5178 | Contig_69 | 27314 | 26541 | - | FIG00828236:<br>hypothetical protein           | FIG00828235 | ff                                                                                                                |
| fig 6666666.28482.peg.5179 | Contig_69 | 27606 | 27331 | - | hypothetical protein                           |             |                                                                                                                   |
| fig 6666666.28482.peg.5180 | Contig_69 | 28497 | 27646 | - | POSSIBLE MEMBRANE<br>PROTEIN                   |             |                                                                                                                   |
| fig 6666666.28482.peg.5181 | Contig_69 | 29343 | 28519 | - | hypothetical protein                           |             |                                                                                                                   |
| fig 6666666.28482.peg.5182 | Contig_69 | 29467 | 30660 | + | Aldose 1-epimerase (EC<br>5.1.3.3)             | FIG00135025 | isu;Maltose_and_Maltodextrin_Utiliz<br>ation<br>isu;Lactose_and_Galactose_Uptake_a<br>nd_Utilization              |
| fig 6666666.28482.peg.5183 | Contig_69 | 31158 | 30676 | - | hypothetical protein                           |             |                                                                                                                   |
| fig 6666666.28482.peg.5184 | Contig_69 | 31339 | 32652 | + | putative cytochrome<br>P450 hydroxylase        | FIG00032437 | idu(49);Nitric_oxide_synthase                                                                                     |
| fig 6666666.28482.peg.5185 | Contig_69 | 34536 | 33589 | - | hypothetical protein                           | FIG00638284 | ff                                                                                                                |
| fig 6666666.28482.peg.5186 | Contig_69 | 34648 | 34983 | + | hypothetical protein                           | FIG00638284 | ff                                                                                                                |
| fig 6666666.28482.peg.5187 | Contig_69 | 36431 | 35025 | - | Nitrate/nitrite<br>transporter                 | FIG00005529 | idu(2);Nitrate_and_nitrite_ammonific<br>ation                                                                     |
| fig 6666666.28482.peg.5188 | Contig_69 | 39379 | 39059 | - | Ferredoxin                                     | FIG00001676 | idu(4);Soluble_cytochromes_and_fun<br>ctionally_related_electron_carriers<br>idu(4);Inorganic_Sulfur_Assimilation |
| fig 6666666.28482.peg.5189 | Contig_69 | 41026 | 39431 | - | FAD dependent<br>oxidoreductase                |             |                                                                                                                   |
| fig 6666666.28482.peg.5190 | Contig_69 | 41249 | 41746 | + | Transcriptional regulator,<br>TetR family      |             |                                                                                                                   |

|                            |           |       |       |   |                                                                                                  |             |                                                                                                                                              |
|----------------------------|-----------|-------|-------|---|--------------------------------------------------------------------------------------------------|-------------|----------------------------------------------------------------------------------------------------------------------------------------------|
| fig 6666666.28482.peg.5191 | Contig_69 | 41905 | 43041 | + | Phenylpropionate dioxygenase and related ring-hydroxylating dioxygenases, large terminal subunit |             |                                                                                                                                              |
| fig 6666666.28482.peg.5192 | Contig_69 | 43213 | 43091 | - | hypothetical protein                                                                             |             |                                                                                                                                              |
| fig 6666666.28482.peg.5193 | Contig_69 | 43956 | 43441 | - | hypothetical protein                                                                             |             |                                                                                                                                              |
| fig 6666666.28482.peg.5194 | Contig_69 | 45582 | 44302 | - | Amidohydrolase 2                                                                                 |             |                                                                                                                                              |
| fig 6666666.28482.peg.5195 | Contig_69 | 47631 | 45850 | - | D-aminoacylase (EC 3.5.1.81)                                                                     | FIG01332753 | ff                                                                                                                                           |
| fig 6666666.28482.peg.5196 | Contig_69 | 48233 | 49891 | + | Long-chain-fatty-acid--CoA ligase (EC 6.2.1.3)                                                   | FIG00018699 | idu(72);n-Phenylalkanoic_acid_degradation idu(72);Fatty_acid_metabolism_cluster idu(72);Biotin_synthesis_cluster idu(72);Biotin_biosynthesis |
| fig 6666666.28482.peg.5197 | Contig_69 | 51858 | 50392 | - | Cyclohexanone monooxygenase (EC 1.14.13.22)                                                      | FIG00975774 | ff                                                                                                                                           |
| fig 6666666.28482.peg.5198 | Contig_69 | 52425 | 52033 | - | alpha/beta hydrolase fold domain protein                                                         |             |                                                                                                                                              |
| fig 6666666.28482.peg.5199 | Contig_69 | 53510 | 52443 | - | hypothetical protein                                                                             |             |                                                                                                                                              |
| fig 6666666.28482.peg.5200 | Contig_69 | 53733 | 53867 | + | hypothetical protein                                                                             |             |                                                                                                                                              |
| fig 6666666.28482.peg.5201 | Contig_69 | 55105 | 54059 | - | N5,N10-methylenetetrahydromethanopterin reductase-related protein                                | FIG01460162 | ff                                                                                                                                           |
| fig 6666666.28482.peg.5202 | Contig_69 | 55476 | 55102 | - | FIG00822683: hypothetical protein                                                                | FIG00822682 | ff                                                                                                                                           |

|                            |           |       |       |   |                                                 |             |                                                                                                                                                                                  |
|----------------------------|-----------|-------|-------|---|-------------------------------------------------|-------------|----------------------------------------------------------------------------------------------------------------------------------------------------------------------------------|
| fig 6666666.28482.peg.5203 | Contig_69 | 55841 | 55473 | - | protein of unknown function DUF227              |             |                                                                                                                                                                                  |
| fig 6666666.28482.peg.5204 | Contig_69 | 57002 | 55887 | - | Alcohol dehydrogenase (EC 1.1.1.1)              | FIG01007502 | idu(17);Glycerolipid_and_Glycerophospholipid_Metabolism_in_Bacteria<br>idu(17);Fermentations:_Mixed_acid<br>idu(17);Butanol_Biosynthesis                                         |
| fig 6666666.28482.peg.5205 | Contig_69 | 58527 | 57037 | - | Aldehyde dehydrogenase (EC 1.2.1.3)             | FIG01292786 | idu(16);Pyruvate_metabolism_II:_acetyl-CoA,_acetogenesis_from_pyruvate<br>icw(1);Glycerolipid_and_Glycerophospholipid_Metabolism_in_Bacteria<br>idu(16);Methylglyoxal_Metabolism |
| fig 6666666.28482.peg.5206 | Contig_69 | 59100 | 58747 | - | rieske [2Fe-2S] domain protein                  |             |                                                                                                                                                                                  |
| fig 6666666.28482.peg.5207 | Contig_69 | 59450 | 59097 | - | hypothetical protein                            |             |                                                                                                                                                                                  |
| fig 6666666.28482.peg.5208 | Contig_69 | 60837 | 60325 | - | hypothetical protein                            |             |                                                                                                                                                                                  |
| fig 6666666.28482.peg.5209 | Contig_69 | 61643 | 60834 | - | hypothetical protein                            | FIG00638284 | ff                                                                                                                                                                               |
| fig 6666666.28482.peg.5210 | Contig_69 | 62425 | 61721 | - | possible transcriptional regulator, GntR family |             |                                                                                                                                                                                  |
| fig 6666666.28482.peg.5211 | Contig_69 | 62561 | 62704 | + | hypothetical protein                            |             |                                                                                                                                                                                  |
| fig 6666666.28482.peg.5212 | Contig_69 | 62727 | 63980 | + | hypothetical protein                            | FIG00638284 | ff                                                                                                                                                                               |
| fig 6666666.28482.peg.5213 | Contig_69 | 64082 | 64360 | + | Rieske [2Fe-2S] domain, putative                | FIG00825996 | ff                                                                                                                                                                               |
| fig 6666666.28482.peg.5214 | Contig_69 | 64363 | 65487 | + | amidohydrolase family protein                   | FIG00604942 | ff                                                                                                                                                                               |

|                            |           |       |       |   |                                                                                                                     |             |                                                                                    |
|----------------------------|-----------|-------|-------|---|---------------------------------------------------------------------------------------------------------------------|-------------|------------------------------------------------------------------------------------|
| fig 6666666.28482.peg.5215 | Contig_69 | 65484 | 66464 | + | Flavodoxin reductases (ferredoxin-NADPH reductases) family 1; Vanillate O-demethylase oxidoreductase (EC 1.14.13.-) | FIG00001276 | idu(2);Anaerobic_respiratory_reductases<br>idu(3);Anaerobic_respiratory_reductases |
| fig 6666666.28482.peg.5216 | Contig_7  | 52    | 276   | + | hypothetical protein                                                                                                |             |                                                                                    |
| fig 6666666.28482.peg.5217 | Contig_7  | 369   | 1628  | + | Possible membrane protein                                                                                           | FIG01121868 | ff                                                                                 |
| fig 6666666.28482.peg.5218 | Contig_7  | 1739  | 4390  | + | Valyl-tRNA synthetase (EC 6.1.1.9)                                                                                  | FIG00000129 | isu;tRNA_aminoacylation,_Val                                                       |
| fig 6666666.28482.peg.5219 | Contig_7  | 4387  | 5823  | + | Dihydrofolate synthase (EC 6.3.2.12) / Folylpolyglutamate synthase (EC 6.3.2.17)                                    | FIG00000106 | isu;Folate_Biosynthesis<br>isu;Folate_Biosynthesis                                 |
| fig 6666666.28482.peg.5220 | Contig_7  | 5862  | 6176  | + | Possible membrane protein                                                                                           | FIG01121868 | ff                                                                                 |
| fig 6666666.28482.peg.5221 | Contig_7  | 6206  | 6616  | + | Nucleoside diphosphate kinase (EC 2.7.4.6)                                                                          | FIG00000251 | isu;Purine_conversions<br>isu;pyrimidine_conversions                               |
| fig 6666666.28482.peg.5222 | Contig_7  | 7074  | 9689  | + | Ribonuclease E (EC 3.1.26.12)                                                                                       | FIG00000913 | isu;RNA_processing_and_degradation,_bacterial                                      |
| fig 6666666.28482.peg.5223 | Contig_7  | 9894  | 10205 | + | LSU ribosomal protein L21p                                                                                          | FIG00000276 | isu;Ribosome_LSU_bacterial<br>isu;CBSS-176279.3.peg.868                            |
| fig 6666666.28482.peg.5224 | Contig_7  | 10216 | 10482 | + | LSU ribosomal protein L27p                                                                                          | FIG00000189 | icw(1);Ribosome_LSU_bacterial<br>icw(1);CBSS-176279.3.peg.868                      |
| fig 6666666.28482.peg.5225 | Contig_7  | 10571 | 12013 | + | COG0536: GTP-binding protein Obg                                                                                    | FIG00000169 | ff                                                                                 |
| fig 6666666.28482.peg.5226 | Contig_7  | 12010 | 13113 | + | Glutamate 5-kinase (EC 2.7.2.11) / RNA-binding C-terminal domain PUA                                                | FIG01303783 | isu;Proline_Synthesis<br>isu;Proline_Synthesis                                     |

|                            |          |       |       |   |                                                                  |             |                                                                                                                                             |
|----------------------------|----------|-------|-------|---|------------------------------------------------------------------|-------------|---------------------------------------------------------------------------------------------------------------------------------------------|
| fig 6666666.28482.peg.5227 | Contig_7 | 13537 | 13118 | - | FIG00823955:<br>hypothetical protein                             | FIG00823954 | ff                                                                                                                                          |
| fig 6666666.28482.peg.5228 | Contig_7 | 14040 | 13555 | - | Organic hydroperoxide<br>resistance transcriptional<br>regulator | FIG00025887 | isu;Oxidative_stress isu;CBSS-<br>269482.1.peg.1294                                                                                         |
| fig 6666666.28482.peg.5229 | Contig_7 | 15788 | 14145 | - | PPE family protein                                               | FIG00013075 | idu(57);CBSS-164757.7.peg.5020                                                                                                              |
| fig 6666666.28482.peg.5230 | Contig_7 | 18614 | 15987 | - | hypothetical protein                                             | FIG00638284 | ff                                                                                                                                          |
| fig 6666666.28482.peg.5231 | Contig_7 | 18651 | 19256 | + | hypothetical protein                                             |             |                                                                                                                                             |
| fig 6666666.28482.peg.5232 | Contig_7 | 20740 | 22623 | + | Acetyl-coenzyme A<br>synthetase (EC 6.2.1.1)                     | FIG00022631 | idu(2);Pyruvate_metabolism_II:_acet<br>yl-CoA,_acetogenesis_from_pyruvate<br>idu(2);Ketoisovalerate_oxidoreductas<br>e                      |
| fig 6666666.28482.peg.5233 | Contig_7 | 23278 | 22628 | - | Transcriptional regulator,<br>TetR family                        | FIG00554417 | ff                                                                                                                                          |
| fig 6666666.28482.peg.5234 | Contig_7 | 23379 | 24644 | + | putative cytochrome<br>P450 hydroxylase                          | FIG00032437 | idu(49);Nitric_oxide_synthase                                                                                                               |
| fig 6666666.28482.peg.5235 | Contig_7 | 25489 | 24641 | - | NAD-dependent protein<br>deacetylase of SIR2<br>family           | FIG00008490 | icw(1);Pyruvate_metabolism_II:_acet<br>yl-CoA,_acetogenesis_from_pyruvate<br>icw(1);Redox-<br>dependent_regulation_of_nucleus_pr<br>ocesses |
| fig 6666666.28482.peg.5236 | Contig_7 | 26056 | 25511 | - | Nicotinamidase (EC<br>3.5.1.19)                                  | FIG00067300 | icw(1);NAD_and_NADP_cofactor_bio<br>synthesis_global idu(1);Redox-<br>dependent_regulation_of_nucleus_pr<br>ocesses                         |

|                            |          |       |       |   |                                                                                  |             |                                                                                                |
|----------------------------|----------|-------|-------|---|----------------------------------------------------------------------------------|-------------|------------------------------------------------------------------------------------------------|
| fig 6666666.28482.peg.5237 | Contig_7 | 26116 | 28158 | + | NAD synthetase (EC 6.3.1.5) / Glutamine amidotransferase chain of NAD synthetase | FIG00000914 | isu;NAD_and_NADP_cofactor_biosynthesis_global<br>isu;NAD_and_NADP_cofactor_biosynthesis_global |
| fig 6666666.28482.peg.5238 | Contig_7 | 30106 | 28334 | - | PE-PGRS family protein                                                           |             | idu(16);PPE_gene_cluster_in_Mycobacteria                                                       |
| fig 6666666.28482.peg.5239 | Contig_7 | 31685 | 31140 | - | hypothetical protein                                                             | FIG00638284 | ff                                                                                             |
| fig 6666666.28482.peg.5240 | Contig_7 | 32245 | 31685 | - | 3-isopropylmalate dehydratase small subunit (EC 4.2.1.33)                        | FIG00000282 | idu(1);Branched-Chain_Amino_Acid_Biosynthesis<br>idu(1);Leucine_Biosynthesis                   |
| fig 6666666.28482.peg.5241 | Contig_7 | 33489 | 32242 | - | 3-isopropylmalate dehydratase large subunit (EC 4.2.1.33)                        | FIG00000280 | icw(1);Branched-Chain_Amino_Acid_Biosynthesis<br>icw(1);Leucine_Biosynthesis                   |
| fig 6666666.28482.peg.5242 | Contig_7 | 34367 | 33480 | - | Isocitrate lyase (EC 4.1.3.1)                                                    | FIG00000818 | idu(1);Serine-glyoxylate_cycle<br>idu(1);Glyoxylate_bypass<br>idu(1);Glyoxylate_bypass_cluster |
| fig 6666666.28482.peg.5243 | Contig_7 | 35808 | 34378 | - | FIG00828468: hypothetical protein                                                | FIG01457983 | ff                                                                                             |
| fig 6666666.28482.peg.5244 | Contig_7 | 35927 | 36703 | + | Transcriptional regulator, GntR family                                           | FIG00621925 | ff                                                                                             |
| fig 6666666.28482.peg.5245 | Contig_7 | 37367 | 36693 | - | Putative protein-S-isoprenylcysteine methyltransferase                           | FIG01318516 | ff                                                                                             |
| fig 6666666.28482.peg.5246 | Contig_7 | 38260 | 37364 | - | Ribokinase (EC 2.7.1.15)                                                         | FIG00028476 | isu;D-ribose_utilization<br>isu;Deoxyribose_and_Deoxynucleoside_Catabolism                     |
| fig 6666666.28482.peg.5247 | Contig_7 | 38416 | 40635 | + | Adenylate cyclase (EC 4.6.1.1)                                                   | FIG00001294 | idu(25);cAMP_signaling_in_bacteria                                                             |

|                            |          |       |       |   |                                                             |             |                                               |
|----------------------------|----------|-------|-------|---|-------------------------------------------------------------|-------------|-----------------------------------------------|
| fig 6666666.28482.peg.5248 | Contig_7 | 40635 | 42038 | + | Small-conductance mechanosensitive channel membrane protein | FIG00821874 | ff                                            |
| fig 6666666.28482.peg.5249 | Contig_7 | 42085 | 43332 | + | Gamma-glutamyl phosphate reductase (EC 1.2.1.41)            | FIG00000365 | isu;Proline_Synthesis                         |
| fig 6666666.28482.peg.5250 | Contig_7 | 43361 | 44236 | + | MoxR-like ATPases                                           | FIG01225784 | ff                                            |
| fig 6666666.28482.peg.5251 | Contig_7 | 44236 | 45681 | + | VWA containing CoxE family protein                          |             | ff                                            |
| fig 6666666.28482.peg.5252 | Contig_7 | 45820 | 46479 | + | Nicotinate-nucleotide adenyltransferase (EC 2.7.7.18)       | FIG01956071 | isu;NAD_and_NADP_cofactor_biosynthesis_global |
| fig 6666666.28482.peg.5253 | Contig_7 | 46476 | 46871 | + | lojap protein                                               | FIG00135315 | ff                                            |
| fig 6666666.28482.peg.5254 | Contig_7 | 46868 | 47542 | + | Phosphoglycerate mutase (EC 5.4.2.1)                        | FIG00005840 | idu(2);Phosphoglycerate_mutase_protein_family |
| fig 6666666.28482.peg.5255 | Contig_7 | 47532 | 48275 | + | FIG00999365: hypothetical protein                           | FIG00821116 | ff                                            |
| fig 6666666.28482.peg.5256 | Contig_7 | 48334 | 49170 | + | Hypothetical protein DUF194, DegV family                    | FIG00005590 | ff                                            |
| fig 6666666.28482.peg.5257 | Contig_7 | 52074 | 49153 | - | Transmembrane transport protein MmpL4                       | FIG01448110 | ff                                            |
| fig 6666666.28482.peg.5258 | Contig_7 | 52463 | 52071 | - | membrane protein, MmpS family                               | FIG01309473 | ff                                            |
| fig 6666666.28482.peg.5259 | Contig_7 | 53711 | 52653 | - | FIG00830683: hypothetical protein                           | FIG00830679 | ff                                            |

|                            |          |       |       |   |                                                                                                                                  |             |                                                                                                                                                            |
|----------------------------|----------|-------|-------|---|----------------------------------------------------------------------------------------------------------------------------------|-------------|------------------------------------------------------------------------------------------------------------------------------------------------------------|
| fig 6666666.28482.peg.5260 | Contig_7 | 55574 | 53826 | - | Long-chain-fatty-acid--<br>CoA ligase (EC 6.2.1.3)                                                                               | FIG00018699 | idu(72);n-<br>Phenylalkanoic_acid_degradation<br>idu(72);Fatty_acid_metabolism_clust<br>er idu(72);Biotin_synthesis_cluster<br>idu(72);Biotin_biosynthesis |
| fig 6666666.28482.peg.5261 | Contig_7 | 56698 | 55619 | - | POSSIBLE EXPORTED<br>PROTEIN                                                                                                     | FIG01386146 | ff                                                                                                                                                         |
| fig 6666666.28482.peg.5262 | Contig_7 | 59814 | 56803 | - | membrane protein,<br>MmpL family, putative                                                                                       | FIG00822041 | ff                                                                                                                                                         |
| fig 6666666.28482.peg.5263 | Contig_7 | 61332 | 59890 | - | POSSIBLE CONSERVED<br>POLYKETIDE SYNTHASE<br>ASSOCIATED PROTEIN<br>PAPA2                                                         | FIG01352858 | ff                                                                                                                                                         |
| fig 6666666.28482.peg.5264 | Contig_7 | 61765 | 72948 | + | Malonyl CoA-acyl carrier<br>protein transacylase (EC<br>2.3.1.39)                                                                | FIG00000319 | idu(7);Fatty_Acid_Biosynthesis_FASII                                                                                                                       |
| fig 6666666.28482.peg.5265 | Contig_7 | 73326 | 72961 | - | FIG00821649:<br>hypothetical protein                                                                                             | FIG00821646 | ff                                                                                                                                                         |
| fig 6666666.28482.peg.5266 | Contig_7 | 74513 | 73407 | - | Acyl-CoA dehydrogenase<br>family protein                                                                                         | FIG01288640 | ff                                                                                                                                                         |
| fig 6666666.28482.peg.5267 | Contig_7 | 75681 | 74521 | - | Putative acyl-CoA<br>dehydrogenase<br>oxidoreductase (EC<br>1.3.99.3), may be related<br>to NAD-dependent<br>histone acetylation | FIG00001345 | isu;CBSS-216591.1.peg.168                                                                                                                                  |
| fig 6666666.28482.peg.5268 | Contig_7 | 76054 | 75821 | - | hypothetical protein                                                                                                             |             |                                                                                                                                                            |

|                            |           |       |       |   |                                                                                      |             |                                                                                           |
|----------------------------|-----------|-------|-------|---|--------------------------------------------------------------------------------------|-------------|-------------------------------------------------------------------------------------------|
| fig 6666666.28482.peg.5269 | Contig_7  | 76451 | 76041 | - | FIG00824120:<br>hypothetical protein                                                 | FIG01319003 | ff                                                                                        |
| fig 6666666.28482.peg.5270 | Contig_7  | 76588 | 77439 | + | Putative competence<br>protein ComEA                                                 | FIG00996743 | ff                                                                                        |
| fig 6666666.28482.peg.5271 | Contig_7  | 77445 | 79001 | + | DNA internalization-<br>related competence<br>protein ComEC/Rec2                     | FIG01259681 | ff                                                                                        |
| fig 6666666.28482.peg.5272 | Contig_7  | 79028 | 79996 | + | DNA polymerase III delta<br>subunit (EC 2.7.7.7)                                     | FIG00106663 | isu;DNA-replication                                                                       |
| fig 6666666.28482.peg.5273 | Contig_7  | 80280 | 80020 | - | SSU ribosomal protein<br>S20p                                                        | FIG00000213 | ff                                                                                        |
| fig 6666666.28482.peg.5274 | Contig_7  | 80487 | 82133 | + | Protein containing<br>domains DUF404,<br>DUF407                                      | FIG00537781 | ff                                                                                        |
| fig 6666666.28482.peg.5275 | Contig_7  | 82133 | 83110 | + | Protein containing<br>domains DUF403                                                 | FIG00537369 | ff                                                                                        |
| fig 6666666.28482.peg.5276 | Contig_7  | 83110 | 83949 | + | Protein containing<br>transglutaminase-like<br>domain, putative<br>cysteine protease | FIG00453060 | ff                                                                                        |
| fig 6666666.28482.peg.5277 | Contig_70 | 165   | 1079  | + | methyltransferase                                                                    | FIG01346564 | ff                                                                                        |
| fig 6666666.28482.peg.5278 | Contig_70 | 1093  | 2280  | + | L-carnitine<br>dehydratase/bile acid-<br>inducible protein F (EC<br>2.8.3.16)        | FIG00450481 | ff                                                                                        |
| fig 6666666.28482.peg.5279 | Contig_70 | 2726  | 2277  | - | Serine phosphatase<br>RsbU, regulator of sigma<br>subunit                            | FIG00017431 | idu(4);SigmaB_stress_responce_regul<br>ation idu(4);Sigma-<br>B_stress_response_cluster_1 |

|                            |           |       |      |   |                                                                                               |             |                                                                                                                                                                                                                        |
|----------------------------|-----------|-------|------|---|-----------------------------------------------------------------------------------------------|-------------|------------------------------------------------------------------------------------------------------------------------------------------------------------------------------------------------------------------------|
| fig 6666666.28482.peg.5280 | Contig_70 | 4287  | 2701 | - | Phytochrome, two-component sensor histidine kinase (EC 2.7.3.-); cyanobacterial phytochrome 1 | FIG00144104 | isu;Oxidative_stress<br>isu;Oxygen_and_light_sensor_PpaA-PpsR                                                                                                                                                          |
| fig 6666666.28482.peg.5281 | Contig_70 | 5450  | 4284 | - | FIG00830295: hypothetical protein                                                             | FIG00830288 | ff                                                                                                                                                                                                                     |
| fig 6666666.28482.peg.5282 | Contig_70 | 6836  | 5667 | - | Butyryl-CoA dehydrogenase (EC 1.3.99.2)                                                       | FIG00009149 | idu(39);Isoleucine_degradation<br>idu(39);Lysine_fermentation<br>idu(39);Butanol_Biosynthesis<br>idu(39);Acetyl-CoA_fermentation_to_Butyrate<br>idu(39);Valine_degradation<br>idu(39);Anaerobic_respiratory_reductions |
| fig 6666666.28482.peg.5283 | Contig_70 | 7428  | 6862 | - | Phosphoribosylaminoimidazole carboxylase catalytic subunit (EC 4.1.1.21)                      | FIG00000227 | isu;De_Novo_Purine_Biosynthesis                                                                                                                                                                                        |
| fig 6666666.28482.peg.5284 | Contig_70 | 8695  | 7415 | - | Phosphoribosylaminoimidazole carboxylase ATPase subunit (EC 4.1.1.21)                         | FIG00000375 | icw(1);De_Novo_Purine_Biosynthesis                                                                                                                                                                                     |
| fig 6666666.28482.peg.5285 | Contig_70 | 8705  | 9364 | + | FIG00821069: hypothetical protein                                                             | FIG00821068 | ff                                                                                                                                                                                                                     |
| fig 6666666.28482.peg.5286 | Contig_70 | 9837  | 9319 | - | FIG00995613: hypothetical protein                                                             | FIG00820371 | ff                                                                                                                                                                                                                     |
| fig 6666666.28482.peg.5287 | Contig_70 | 10672 | 9848 | - | Biotin-protein ligase (EC 6.3.4.15)                                                           | FIG00000972 | isu;Biotin_synthesis_cluster<br>isu;Biotin_biosynthesis                                                                                                                                                                |

|                            |           |       |       |   |                                                                                                                        |             |                                                                                                                     |
|----------------------------|-----------|-------|-------|---|------------------------------------------------------------------------------------------------------------------------|-------------|---------------------------------------------------------------------------------------------------------------------|
| fig 6666666.28482.peg.5288 | Contig_70 | 10723 | 12363 | + | Methylcrotonyl-CoA carboxylase carboxyl transferase subunit (EC 6.4.1.4)                                               | FIG00138249 | idu(2);Serine-glyoxylate_cycle<br>idu(2);HMG_CoA_Synthesis<br>idu(2);Leucine_Degradation_and_HM<br>G-CoA_Metabolism |
| fig 6666666.28482.peg.5289 | Contig_70 | 12360 | 12578 | + | FIG00820143:<br>hypothetical protein                                                                                   | FIG00820141 | ff                                                                                                                  |
| fig 6666666.28482.peg.5290 | Contig_70 | 12575 | 13219 | + | Septum formation protein Maf                                                                                           | FIG00021845 | isu;Bacterial_Cell_Division<br>isu;Bacterial_Cytoskeleton                                                           |
| fig 6666666.28482.peg.5291 | Contig_70 | 13321 | 14211 | + | Thiosulfate sulfurtransferase, rhodanese (EC 2.8.1.1)                                                                  | FIG00004487 | ff                                                                                                                  |
| fig 6666666.28482.peg.5292 | Contig_70 | 14211 | 14630 | + | Sulfur acceptor protein SufE for iron-sulfur cluster assembly                                                          | FIG00073306 | isu;Iron-sulfur_cluster_assembly                                                                                    |
| fig 6666666.28482.peg.5293 | Contig_70 | 14787 | 16547 | + | Biotin carboxylase of acetyl-CoA carboxylase (EC 6.3.4.14) / Biotin carboxyl carrier protein of acetyl-CoA carboxylase | FIG00002877 | isu;Fatty_Acid_Biosynthesis_FASII<br>isu;Fatty_Acid_Biosynthesis_FASII                                              |
| fig 6666666.28482.peg.5294 | Contig_70 | 16744 | 17157 | + | Anti-sigma F factor antagonist (spolIAA-2);<br>Anti-sigma B factor antagonist RsbV                                     | FIG00507769 | icw(2);SigmaB_stress_responce_regul<br>ation icw(2);Sigma-<br>B_stress_response_cluster_1                           |

|                            |           |       |       |   |                                                                                                                                            |             |                                                                                                                                                                                                                                               |
|----------------------------|-----------|-------|-------|---|--------------------------------------------------------------------------------------------------------------------------------------------|-------------|-----------------------------------------------------------------------------------------------------------------------------------------------------------------------------------------------------------------------------------------------|
| fig 6666666.28482.peg.5295 | Contig_70 | 17916 | 17128 | - | RNA polymerase sigma factor SigB                                                                                                           | FIG00132885 | icw(1);SigmaB_stress_responce_regulation<br>idu(2);Biofilm_formation_in_Staphylococcus idu(2);Sigma-B_stress_response_cluster_1<br>idu(2);Transcription_initiation,_bacterial_sigma_factors<br>idu(2);Methicillin_resistance_in_Staphylococci |
| fig 6666666.28482.peg.5296 | Contig_70 | 18350 | 17913 | - | Serine-protein kinase RsbW (EC 2.7.11.1)                                                                                                   | FIG00002196 | isu;SigmaB_stress_responce_regulation icw(1);Sigma-B_stress_response_cluster_1                                                                                                                                                                |
| fig 6666666.28482.peg.5297 | Contig_70 | 18626 | 18982 | + | hypothetical protein                                                                                                                       |             |                                                                                                                                                                                                                                               |
| fig 6666666.28482.peg.5298 | Contig_70 | 19002 | 19313 | + | UsfY protein                                                                                                                               |             |                                                                                                                                                                                                                                               |
| fig 6666666.28482.peg.5299 | Contig_70 | 19650 | 19324 | - | Possible transmembrane protein                                                                                                             | FIG01322657 | ff                                                                                                                                                                                                                                            |
| fig 6666666.28482.peg.5300 | Contig_70 | 21138 | 19825 | - | Probable L-lysine-epsilon aminotransferase (EC 2.6.1.36) (L-lysine aminotransferase) (Lysine 6-aminotransferase)                           | FIG00598383 | ff                                                                                                                                                                                                                                            |
| fig 6666666.28482.peg.5301 | Contig_70 | 21644 | 21192 | - | Leucine-responsive regulatory protein, regulator for leucine (or lrp) regulon and high-affinity branched-chain amino acid transport system | FIG00003800 | isu;Glutamine,_Glutamate,_Aspartate_and_Aspargine_Biosynthesis<br>isu;Branched-Chain_Amino_Acid_Biosynthesis                                                                                                                                  |

|                            |           |       |       |   |                                                                                      |             |                                                                                                                                                          |
|----------------------------|-----------|-------|-------|---|--------------------------------------------------------------------------------------|-------------|----------------------------------------------------------------------------------------------------------------------------------------------------------|
| fig 6666666.28482.peg.5302 | Contig_70 | 21687 | 22925 | + | Uncharacterized protein Rv3292/MT3391                                                | FIG00546464 | ff                                                                                                                                                       |
| fig 6666666.28482.peg.5303 | Contig_70 | 22922 | 24451 | + | Aldehyde dehydrogenase B (EC 1.2.1.22)                                               | FIG00138741 | isu;Glycerolipid_and_Glycerophospholipid_Metabolism_in_Bacteria<br>isu;Methylglyoxal_Metabolism                                                          |
| fig 6666666.28482.peg.5304 | Contig_70 | 24626 | 25162 | + | Transcriptional regulator, TetR family                                               | FIG00554417 | ff                                                                                                                                                       |
| fig 6666666.28482.peg.5305 | Contig_70 | 25212 | 29804 | + | Probable ATP-dependent helicase Ihr (EC 3.6.1.-)                                     | FIG01319231 | ff                                                                                                                                                       |
| fig 6666666.28482.peg.5306 | Contig_70 | 29808 | 30572 | + | Formamidopyrimidine-DNA glycosylase (EC 3.2.2.23)                                    | FIG00035634 | idu(3);DNA_Repair_Base_Excision                                                                                                                          |
| fig 6666666.28482.peg.5307 | Contig_70 | 30630 | 30950 | + | hypothetical protein                                                                 |             |                                                                                                                                                          |
| fig 6666666.28482.peg.5308 | Contig_70 | 32084 | 30945 | - | Phosphate ABC transporter, periplasmic phosphate-binding protein PstS (TC 3.A.1.7.1) | FIG00010508 | idu(4);High_affinity_phosphate_transporter_and_control_of_PHO_regulon<br>idu(4);Phosphate_metabolism<br>idu(4);PhoR-PhoB_two-component_regulatory_system |
| fig 6666666.28482.peg.5309 | Contig_70 | 32995 | 32099 | - | POSSIBLE ESTERASE LIPOPROTEIN LPQC                                                   | FIG01332291 | ff                                                                                                                                                       |
| fig 6666666.28482.peg.5310 | Contig_70 | 33160 | 33513 | + | hypothetical protein                                                                 |             |                                                                                                                                                          |
| fig 6666666.28482.peg.5311 | Contig_70 | 33665 | 33976 | + | FIG00826668: hypothetical protein                                                    | FIG00826666 | ff                                                                                                                                                       |
| fig 6666666.28482.peg.5312 | Contig_70 | 34133 | 34303 | + | hypothetical protein                                                                 |             |                                                                                                                                                          |

|                            |           |       |       |   |                                               |             |                                                                                                                                                                                |
|----------------------------|-----------|-------|-------|---|-----------------------------------------------|-------------|--------------------------------------------------------------------------------------------------------------------------------------------------------------------------------|
| fig 6666666.28482.peg.5313 | Contig_70 | 36493 | 34310 | - | Arylsulfatase (EC 3.1.6.1)                    | FIG00016566 | idu(3);Sulfatases_and_sulfatase_modifying_factor_1<br>idu(3);Galactosylceramide_and_Sulfatide_metabolism<br>idu(3);Steroid_sulfates<br>idu(3);Alkanesulfonate_assimilation     |
| fig 6666666.28482.peg.5314 | Contig_71 | 269   | 499   | + | Iron-sulphur-binding reductase                | FIG01326448 | ff                                                                                                                                                                             |
| fig 6666666.28482.peg.5315 | Contig_71 | 836   | 513   | - | transcriptional modulator of MazE/toxin, MazF |             |                                                                                                                                                                                |
| fig 6666666.28482.peg.5316 | Contig_71 | 982   | 833   | - | hypothetical protein                          |             |                                                                                                                                                                                |
| fig 6666666.28482.peg.5317 | Contig_71 | 1071  | 2417  | + | Aspartate aminotransferase (EC 2.6.1.1)       | FIG00719736 | isu;Coenzyme_M_biosynthesis_--_gjo<br>isu;Glutamine,_Glutamate,_Aspartate_and_Aspargine_Biosynthesis<br>isu;CBSS-216591.1.peg.168<br>isu;Threonine_and_Homoserine_Biosynthesis |
| fig 6666666.28482.peg.5318 | Contig_71 | 2676  | 3254  | + | hypothetical protein                          |             |                                                                                                                                                                                |
| fig 6666666.28482.peg.5319 | Contig_71 | 3321  | 4640  | + | FIG00821472:<br>hypothetical protein          | FIG00821471 | ff                                                                                                                                                                             |
| fig 6666666.28482.peg.5320 | Contig_71 | 5854  | 5477  | - | FIG00821425:<br>hypothetical protein          | FIG00821424 | ff                                                                                                                                                                             |
| fig 6666666.28482.peg.5321 | Contig_71 | 6629  | 5874  | - | FIG00822836:<br>hypothetical protein          | FIG00822835 | ff                                                                                                                                                                             |

|                            |           |      |      |   |                                                                                                                                                                                 |             |                                                                                                                                                                                                                                                                                                                                                                                                                                                                           |
|----------------------------|-----------|------|------|---|---------------------------------------------------------------------------------------------------------------------------------------------------------------------------------|-------------|---------------------------------------------------------------------------------------------------------------------------------------------------------------------------------------------------------------------------------------------------------------------------------------------------------------------------------------------------------------------------------------------------------------------------------------------------------------------------|
| fig 6666666.28482.peg.5322 | Contig_72 | 2167 | 23   | - | Enoyl-CoA hydratase<br>[isoleucine degradation]<br>(EC 4.2.1.17) / 3-<br>hydroxyacyl-CoA<br>dehydrogenase (EC<br>1.1.1.35) / 3-<br>hydroxybutyryl-CoA<br>epimerase (EC 5.1.2.3) | FIG01303838 | isu;n-<br>Phenylalkanoic_acid_degradation<br>isu;n-<br>Phenylalkanoic_acid_degradation<br>isu;Polyhydroxybutyrate_metabolism<br>isu;Polyhydroxybutyrate_metabolism<br>isu;Isoleucine_degradation<br>isu;Isoleucine_degradation<br>isu;Fatty_acid_metabolism_cluster<br>isu;Fatty_acid_metabolism_cluster<br>isu;Acetyl-<br>CoA_fermentation_to_Butyrate<br>isu;Acetyl-<br>CoA_fermentation_to_Butyrate<br>idu(4);Valine_degradation<br>idu(4);Butyrate_metabolism_cluster |
| fig 6666666.28482.peg.5323 | Contig_72 | 3383 | 2172 | - | 3-ketoacyl-CoA thiolase<br>[isoleucine degradation]<br>(EC 2.3.1.16)                                                                                                            | FIG01304912 | icw(1);Isoleucine_degradation                                                                                                                                                                                                                                                                                                                                                                                                                                             |
| fig 6666666.28482.peg.5324 | Contig_72 | 3743 | 4915 | + | putative<br>aminotransferase                                                                                                                                                    | FIG00830125 | ff                                                                                                                                                                                                                                                                                                                                                                                                                                                                        |
| fig 6666666.28482.peg.5325 | Contig_72 | 5336 | 4884 | - | FIG00822577:<br>hypothetical protein                                                                                                                                            | FIG00822575 | ff                                                                                                                                                                                                                                                                                                                                                                                                                                                                        |
| fig 6666666.28482.peg.5326 | Contig_72 | 5795 | 5340 | - | FIG00822577:<br>hypothetical protein                                                                                                                                            | FIG00822575 | ff                                                                                                                                                                                                                                                                                                                                                                                                                                                                        |
| fig 6666666.28482.peg.5327 | Contig_72 | 6987 | 5854 | - | Alpha-methylacyl-CoA<br>racemase (EC 5.1.99.4)                                                                                                                                  | FIG01312689 | ff                                                                                                                                                                                                                                                                                                                                                                                                                                                                        |

|                            |           |       |       |   |                                                                                           |             |                                                                                                                                                            |
|----------------------------|-----------|-------|-------|---|-------------------------------------------------------------------------------------------|-------------|------------------------------------------------------------------------------------------------------------------------------------------------------------|
| fig 6666666.28482.peg.5328 | Contig_72 | 7436  | 6993  | - | FIG00823411:<br>hypothetical protein                                                      | FIG00823410 | ff                                                                                                                                                         |
| fig 6666666.28482.peg.5329 | Contig_72 | 7496  | 9187  | + | Pyruvate decarboxylase<br>(EC 4.1.1.1); Alpha-keto-<br>acid decarboxylase (EC<br>4.1.1.-) | FIG00001998 | idu(2);Pyruvate_metabolism_II:_acet<br>yl-CoA,_acetogenesis_from_pyruvate                                                                                  |
| fig 6666666.28482.peg.5330 | Contig_72 | 9369  | 9184  | - | FIG00823260:<br>hypothetical protein                                                      | FIG00823257 | ff                                                                                                                                                         |
| fig 6666666.28482.peg.5331 | Contig_72 | 9981  | 9379  | - | Long-chain fatty-acid-CoA<br>ligase (EC 6.2.1.3),<br>Mycobacterial subgroup<br>FadD16     | FIG00820609 | ff                                                                                                                                                         |
| fig 6666666.28482.peg.5332 | Contig_72 | 10669 | 10016 | - | Uncharacterized protein<br>Rv1362c/MT1407                                                 | FIG00825912 | ff                                                                                                                                                         |
| fig 6666666.28482.peg.5333 | Contig_72 | 11607 | 10666 | - | POSSIBLE MEMBRANE<br>PROTEIN                                                              | FIG00692835 | ff                                                                                                                                                         |
| fig 6666666.28482.peg.5334 | Contig_72 | 13325 | 11913 | - | Long-chain-fatty-acid--<br>CoA ligase (EC 6.2.1.3)                                        | FIG00018699 | idu(72);n-<br>Phenylalkanoic_acid_degradation<br>idu(72);Fatty_acid_metabolism_clust<br>er idu(72);Biotin_synthesis_cluster<br>idu(72);Biotin_biosynthesis |
| fig 6666666.28482.peg.5335 | Contig_72 | 14552 | 13362 | - | BarH                                                                                      | FIG00668014 | ff                                                                                                                                                         |
| fig 6666666.28482.peg.5336 | Contig_72 | 15052 | 14642 | - | hypothetical protein                                                                      |             |                                                                                                                                                            |
| fig 6666666.28482.peg.5337 | Contig_72 | 15181 | 15927 | + | FIG00660553:<br>hypothetical protein                                                      | FIG00824217 | ff                                                                                                                                                         |
| fig 6666666.28482.peg.5338 | Contig_72 | 16969 | 16268 | - | Transcriptional regulator,<br>TetR family                                                 | FIG00554417 | ff                                                                                                                                                         |
| fig 6666666.28482.peg.5339 | Contig_72 | 17160 | 18437 | + | putative cytochrome<br>P450 hydroxylase                                                   | FIG00032437 | idu(49);Nitric_oxide_synthase                                                                                                                              |

|                            |           |       |       |   |                                                   |             |                                                                                                                                                                                                                                                                                                                                                     |
|----------------------------|-----------|-------|-------|---|---------------------------------------------------|-------------|-----------------------------------------------------------------------------------------------------------------------------------------------------------------------------------------------------------------------------------------------------------------------------------------------------------------------------------------------------|
| fig 6666666.28482.peg.5340 | Contig_72 | 19475 | 18534 | - | putative hydrolase                                |             |                                                                                                                                                                                                                                                                                                                                                     |
| fig 6666666.28482.peg.5341 | Contig_73 | 246   | 836   | + | Transcriptional regulator, TetR family            | FIG00554417 | ff                                                                                                                                                                                                                                                                                                                                                  |
| fig 6666666.28482.peg.5342 | Contig_73 | 1531  | 2715  | + | transposase                                       |             |                                                                                                                                                                                                                                                                                                                                                     |
| fig 6666666.28482.rna.47   | Contig_73 | 2837  | 2764  | - | tRNA-Met-CAT                                      |             |                                                                                                                                                                                                                                                                                                                                                     |
| fig 6666666.28482.peg.5343 | Contig_73 | 3514  | 2903  | - | hypothetical protein                              |             |                                                                                                                                                                                                                                                                                                                                                     |
| fig 6666666.28482.peg.5344 | Contig_73 | 4652  | 3507  | - | Glycerate kinase (EC 2.7.1.31)                    | FIG00000456 | icw(1);Glycerate_metabolism<br>idu(1);Serine-glyoxylate_cycle<br>idu(1);Allantoin_Utilization<br>idu(1);Glycerolipid_and_Glycerophospholipid_Metabolism_in_Bacteria<br>idu(1);Photorespiration_(oxidative_C2_cycle) idu(1);D-galactarate,_D-glucarate_and_D-glycerate_catabolism idu(1);D-galactarate,_D-glucarate_and_D-glycerate_catabolism_-_gjo |
| fig 6666666.28482.peg.5345 | Contig_73 | 6340  | 4652  | - | L-lactate permease                                | FIG00016061 | idu(1);Lactate_utilization                                                                                                                                                                                                                                                                                                                          |
| fig 6666666.28482.peg.5346 | Contig_73 | 7711  | 6341  | - | oxidoreductase, FAD-binding                       | FIG01339311 | ff                                                                                                                                                                                                                                                                                                                                                  |
| fig 6666666.28482.peg.5347 | Contig_73 | 7963  | 8823  | + | Hydroxypyruvate isomerase (EC 5.3.1.22)           | FIG00137389 | isu;Glycerate_metabolism                                                                                                                                                                                                                                                                                                                            |
| fig 6666666.28482.peg.5348 | Contig_73 | 8820  | 9704  | + | 2-hydroxy-3-oxopropionate reductase (EC 1.1.1.60) | FIG00133229 | icw(1);Glycerate_metabolism<br>icw(1);Allantoin_Utilization<br>idu(1);Photorespiration_(oxidative_C2_cycle) idu(1);D-galactarate,_D-glucarate_and_D-glycerate_catabolism idu(1);D-galactarate,_D-glucarate_and_D-glycerate_catabolism_-_gjo                                                                                                         |

|                            |           |       |       |   |                                                                          |             |                                                                                                                 |
|----------------------------|-----------|-------|-------|---|--------------------------------------------------------------------------|-------------|-----------------------------------------------------------------------------------------------------------------|
| fig 6666666.28482.peg.5349 | Contig_73 | 9709  | 11475 | + | Glyoxylate carboligase<br>(EC 4.1.1.47)                                  | FIG00002065 | icw(2);Glycerate_metabolism<br>icw(2);Allantoin_Utilization<br>icw(1);Photorespiration_(oxidative_C<br>2_cycle) |
| fig 6666666.28482.peg.5350 | Contig_73 | 11605 | 12336 | + | Negative regulator of<br>allantoin and glyoxylate<br>utilization operons | FIG00005199 | isu;Allantoin_Utilization                                                                                       |
| fig 6666666.28482.peg.5351 | Contig_73 | 12594 | 12343 | - | hypothetical protein                                                     |             |                                                                                                                 |
| fig 6666666.28482.peg.5352 | Contig_73 | 12625 | 13365 | + | Short-chain<br>dehydrogenase/reductas<br>e SDR                           | FIG00546160 | idu(13);CBSS-164757.7.peg.5020<br>idu(13);Transcription_repair_cluster                                          |
| fig 6666666.28482.peg.5353 | Contig_73 | 14132 | 16879 | + | hypothetical protein                                                     | FIG00638284 | ff                                                                                                              |
| fig 6666666.28482.peg.5354 | Contig_73 | 16987 | 19731 | + | regulatory protein                                                       |             |                                                                                                                 |
| fig 6666666.28482.peg.5355 | Contig_73 | 20020 | 22743 | + | putative regulatory<br>protein                                           | FIG01332075 | ff                                                                                                              |
| fig 6666666.28482.peg.5356 | Contig_73 | 22915 | 23511 | + | metal-dependent<br>phosphohydrolase                                      |             |                                                                                                                 |
| fig 6666666.28482.peg.5357 | Contig_73 | 23525 | 24196 | + | nitroreductase family<br>protein                                         |             |                                                                                                                 |
| fig 6666666.28482.peg.5358 | Contig_73 | 24973 | 24296 | - | RNA polymerase sigma<br>factor RpoE                                      |             | isu;Transcription_initiation,_bacterial<br>_sigma_factors                                                       |
| fig 6666666.28482.peg.5359 | Contig_74 | 249   | 722   | + | Transcriptional regulator,<br>HxIR family                                | FIG00906075 | ff                                                                                                              |
| fig 6666666.28482.peg.5360 | Contig_74 | 727   | 879   | + | hypothetical protein                                                     |             |                                                                                                                 |
| fig 6666666.28482.peg.5361 | Contig_74 | 1157  | 1041  | - | hypothetical protein                                                     |             |                                                                                                                 |
| fig 6666666.28482.peg.5362 | Contig_74 | 1278  | 1481  | + | hypothetical protein                                                     |             |                                                                                                                 |
| fig 6666666.28482.peg.5363 | Contig_74 | 2626  | 2492  | - | hypothetical protein                                                     |             |                                                                                                                 |
| fig 6666666.28482.peg.5364 | Contig_74 | 2975  | 2823  | - | hypothetical protein                                                     |             |                                                                                                                 |
| fig 6666666.28482.peg.5365 | Contig_74 | 2988  | 4478  | + | Amidase( EC:3.5.1.4 )                                                    |             |                                                                                                                 |
| fig 6666666.28482.peg.5366 | Contig_74 | 5936  | 5556  | - | Death on curing protein,<br>Doc toxin                                    | FIG00021347 | ff                                                                                                              |
| fig 6666666.28482.peg.5367 | Contig_74 | 6121  | 5933  | - | hypothetical protein                                                     |             |                                                                                                                 |

|                            |           |       |       |   |                                                                  |             |                                                                                                               |
|----------------------------|-----------|-------|-------|---|------------------------------------------------------------------|-------------|---------------------------------------------------------------------------------------------------------------|
| fig 6666666.28482.peg.5368 | Contig_74 | 6433  | 6161  | - | hypothetical protein                                             |             |                                                                                                               |
| fig 6666666.28482.peg.5369 | Contig_74 | 6539  | 7222  | + | Methyltransferase (EC 2.1.1.-)                                   | FIG00515945 | ff                                                                                                            |
| fig 6666666.28482.peg.5370 | Contig_74 | 7844  | 7284  | - | transcriptional regulator, TetR family                           |             |                                                                                                               |
| fig 6666666.28482.peg.5371 | Contig_74 | 7908  | 8951  | + | Aldo-keto reductase                                              | FIG00639501 | ff                                                                                                            |
| fig 6666666.28482.peg.5372 | Contig_74 | 9750  | 9172  | - | hypothetical protein                                             |             |                                                                                                               |
| fig 6666666.28482.peg.5373 | Contig_74 | 10428 | 9766  | - | Transcriptional regulator, TetR family                           | FIG00628138 | ff                                                                                                            |
| fig 6666666.28482.peg.5374 | Contig_74 | 10579 | 10866 | + | hypothetical protein                                             |             |                                                                                                               |
| fig 6666666.28482.peg.5375 | Contig_74 | 11539 | 10874 | - | nitroreductase family protein                                    | FIG01312078 | ff                                                                                                            |
| fig 6666666.28482.peg.5376 | Contig_74 | 12252 | 11563 | - | hypothetical protein Rv2227                                      | FIG01321447 | ff                                                                                                            |
| fig 6666666.28482.peg.5377 | Contig_74 | 12788 | 12276 | - | Methylated-DNA--protein-cysteine methyltransferase (EC 2.1.1.63) | FIG00000328 | icw(1);DNA_repair,_bacterial                                                                                  |
| fig 6666666.28482.peg.5378 | Contig_74 | 12923 | 13429 | + | RNA polymerase sigma-54 factor RpoN                              | FIG00006092 | idu(2);Flagellar_motility<br>idu(2);Flagellum<br>idu(2);Transcription_initiation,_bacte<br>rial_sigma_factors |
| fig 6666666.28482.peg.5379 | Contig_74 | 13426 | 14031 | + | Methylated-DNA--protein-cysteine methyltransferase (EC 2.1.1.63) | FIG00000328 | icw(1);DNA_repair,_bacterial                                                                                  |
| fig 6666666.28482.peg.5380 | Contig_74 | 15460 | 14099 | - | Aldehyde dehydrogenase                                           | FIG00991844 | ff                                                                                                            |
| fig 6666666.28482.peg.5381 | Contig_74 | 15546 | 16472 | + | FIG00821997: hypothetical protein                                | FIG00821996 | ff                                                                                                            |
| fig 6666666.28482.peg.5382 | Contig_74 | 16533 | 17129 | + | Transcriptional regulator, TetR family                           | FIG00554417 | ff                                                                                                            |
| fig 6666666.28482.peg.5383 | Contig_74 | 17318 | 17190 | - | hypothetical protein                                             |             |                                                                                                               |

|                            |           |       |       |   |                                                                            |             |                                                                                                                                          |
|----------------------------|-----------|-------|-------|---|----------------------------------------------------------------------------|-------------|------------------------------------------------------------------------------------------------------------------------------------------|
| fig 6666666.28482.peg.5384 | Contig_74 | 17368 | 17802 | + | membrane protein,<br>MmpS family                                           | FIG01309473 | ff                                                                                                                                       |
| fig 6666666.28482.peg.5385 | Contig_74 | 17799 | 20693 | + | Putative membrane<br>protein                                               | FIG01056920 | ff                                                                                                                                       |
| fig 6666666.28482.peg.5386 | Contig_74 | 21434 | 20706 | - | 3-alpha-(or 20-beta)-<br>hydroxysteroid<br>dehydrogenase(<br>EC:1.1.1.53 ) | FIG01550593 | ff                                                                                                                                       |
| fig 6666666.28482.peg.5387 | Contig_74 | 21882 | 21601 | - | hypothetical protein                                                       |             |                                                                                                                                          |
| fig 6666666.28482.peg.5388 | Contig_74 | 23040 | 22165 | - | FIG00824485:<br>hypothetical protein                                       | FIG00824483 | ff                                                                                                                                       |
| fig 6666666.28482.peg.5389 | Contig_74 | 24284 | 23037 | - | FIG00822014:<br>hypothetical protein                                       | FIG01547276 | ff                                                                                                                                       |
| fig 6666666.28482.peg.5390 | Contig_74 | 24737 | 24372 | - | FIG00986611:<br>hypothetical protein                                       | FIG00986610 | ff                                                                                                                                       |
| fig 6666666.28482.peg.5391 | Contig_74 | 25777 | 24734 | - | Alcohol dehydrogenase<br>(EC 1.1.1.1)                                      | FIG01007502 | idu(17);Glycerolipid_and_Glycerophospholipid_Metabolism_in_Bacteria<br>idu(17);Fermentations:_Mixed_acid<br>idu(17);Butanol_Biosynthesis |
| fig 6666666.28482.peg.5392 | Contig_74 | 25918 | 26724 | + | TesB-like acyl-CoA<br>thioesterase 2                                       | FIG00149128 | isu;Acyl-CoA_thioesterase_II                                                                                                             |
| fig 6666666.28482.peg.5393 | Contig_74 | 26747 | 27283 | + | FIG00822959:<br>hypothetical protein                                       | FIG01321492 | ff                                                                                                                                       |
| fig 6666666.28482.peg.5394 | Contig_74 | 27291 | 28385 | + | FIG00831889:<br>hypothetical protein                                       | FIG00831883 | ff                                                                                                                                       |
| fig 6666666.28482.peg.5395 | Contig_74 | 29372 | 28389 | - | Dihydroflavonol-4-<br>reductase (EC 1.1.1.219)                             | FIG00042188 | idu(2);Biflavanoid_biosynthesis<br>idu(2);Tannin_biosynthesis                                                                            |
| fig 6666666.28482.peg.5396 | Contig_74 | 30352 | 29372 | - | Aldo-keto reductase                                                        | FIG00639501 | ff                                                                                                                                       |
| fig 6666666.28482.peg.5397 | Contig_74 | 30399 | 31742 | + | FIG00821779:<br>hypothetical protein                                       | FIG00821778 | ff                                                                                                                                       |
| fig 6666666.28482.peg.5398 | Contig_74 | 31934 | 32182 | + | hypothetical protein                                                       |             |                                                                                                                                          |

|                            |           |       |       |   |                                                            |             |                                                                     |
|----------------------------|-----------|-------|-------|---|------------------------------------------------------------|-------------|---------------------------------------------------------------------|
| fig 6666666.28482.peg.5399 | Contig_74 | 32294 | 32932 | + | Transcriptional regulator, TetR family                     | FIG00554417 | ff                                                                  |
| fig 6666666.28482.peg.5400 | Contig_74 | 33503 | 34297 | + | Conserved hypothetical integral membrane protein YrbE1A    | FIG00690583 | idu(7);Mycobacterium_virulence_operon_MCE_involved_in_cell_invasion |
| fig 6666666.28482.peg.5401 | Contig_74 | 34297 | 35169 | + | Conserved hypothetical integral membrane protein YrbE1B    | FIG00691621 | icw(2);Mycobacterium_virulence_operon_MCE_involved_in_cell_invasion |
| fig 6666666.28482.peg.5402 | Contig_74 | 35176 | 36501 | + | MCE-family protein Mce1A                                   | FIG00820494 | icw(2);Mycobacterium_virulence_operon_MCE_involved_in_cell_invasion |
| fig 6666666.28482.peg.5403 | Contig_74 | 36498 | 37538 | + | MCE-family protein Mce1B                                   | FIG00763551 | icw(5);Mycobacterium_virulence_operon_MCE_involved_in_cell_invasion |
| fig 6666666.28482.peg.5404 | Contig_74 | 37535 | 39094 | + | MCE-family protein Mce1C                                   | FIG00821293 | icw(7);Mycobacterium_virulence_operon_MCE_involved_in_cell_invasion |
| fig 6666666.28482.peg.5405 | Contig_74 | 39142 | 40659 | + | MCE-family protein Mce1D                                   | FIG00820669 | icw(1);Mycobacterium_virulence_operon_MCE_involved_in_cell_invasion |
| fig 6666666.28482.peg.5406 | Contig_74 | 40656 | 41834 | + | MCE-family lipoprotein LprK (MCE-family lipoprotein Mce1e) | FIG00819998 | icw(2);Mycobacterium_virulence_operon_MCE_involved_in_cell_invasion |
| fig 6666666.28482.peg.5407 | Contig_74 | 41828 | 43378 | + | MCE-family protein Mce1F                                   | FIG00821171 | idu(7);Mycobacterium_virulence_operon_MCE_involved_in_cell_invasion |
| fig 6666666.28482.peg.5408 | Contig_74 | 43634 | 44131 | + | hypothetical protein                                       |             |                                                                     |
| fig 6666666.28482.peg.5409 | Contig_74 | 44244 | 44465 | + | hypothetical protein                                       | FIG00638284 | ff                                                                  |
| fig 6666666.28482.peg.5410 | Contig_74 | 45115 | 44462 | - | Transcriptional regulator, TetR family                     | FIG00554417 | ff                                                                  |

|                            |           |       |       |   |                                                                      |             |                                                                                                                                                                                                                                |
|----------------------------|-----------|-------|-------|---|----------------------------------------------------------------------|-------------|--------------------------------------------------------------------------------------------------------------------------------------------------------------------------------------------------------------------------------|
| fig 6666666.28482.peg.5411 | Contig_74 | 45181 | 46344 | + | 2,3-dihydroxybiphenyl<br>1,2-dioxygenase                             | FIG00004009 | ff                                                                                                                                                                                                                             |
| fig 6666666.28482.peg.5412 | Contig_74 | 46341 | 47285 | + | Fumarylacetoacetate<br>hydrolase family protein                      | FIG00007658 | idu(1);Gentisare_degradation<br>idu(1);Pterin_carbinolamine_dehydra<br>tase<br>idu(1);Salicylate_and_gentisate_cata<br>bolism                                                                                                  |
| fig 6666666.28482.peg.5413 | Contig_74 | 47282 | 48808 | + | 3-(3-hydroxy-<br>phenyl)propionate<br>hydroxylase (EC 1.14.13.-<br>) | FIG00138127 | idu(3);Cinnamic_Acid_Degradation                                                                                                                                                                                               |
| fig 6666666.28482.peg.5414 | Contig_74 | 49770 | 48895 | - | Universal stress protein<br>family                                   | FIG00017615 | ff                                                                                                                                                                                                                             |
| fig 6666666.28482.peg.5415 | Contig_74 | 50874 | 49951 | - | FIG00822668:<br>hypothetical protein                                 | FIG00822666 | ff                                                                                                                                                                                                                             |
| fig 6666666.28482.peg.5416 | Contig_74 | 51140 | 50871 | - | FIG00829490:<br>hypothetical protein                                 | FIG00829489 | ff                                                                                                                                                                                                                             |
| fig 6666666.28482.peg.5417 | Contig_74 | 51766 | 51137 | - | RNA polymerase sigma-<br>54 factor RpoN                              | FIG00006092 | idu(2);Flagellar_motility<br>idu(2);Flagellum<br>idu(2);Transcription_initiation,_bacte<br>rial_sigma_factors                                                                                                                  |
| fig 6666666.28482.peg.5418 | Contig_74 | 52853 | 51777 | - | Butyryl-CoA<br>dehydrogenase (EC<br>1.3.99.2)                        | FIG00009149 | idu(39);Isoleucine_degradation<br>idu(39);Lysine_fermentation<br>idu(39);Butanol_Biosynthesis<br>idu(39);Acetyl-<br>CoA_fermentation_to_Butyrate<br>idu(39);Valine_degradation<br>idu(39);Anaerobic_respiratory_reduc<br>tases |
| fig 6666666.28482.peg.5419 | Contig_74 | 53420 | 52896 | - | FIG00824308:<br>hypothetical protein                                 | FIG00824306 | ff                                                                                                                                                                                                                             |

|                            |           |       |       |   |                                                                                         |             |                                                                     |
|----------------------------|-----------|-------|-------|---|-----------------------------------------------------------------------------------------|-------------|---------------------------------------------------------------------|
| fig 6666666.28482.peg.5420 | Contig_74 | 54580 | 53747 | - | FIG00824549:<br>hypothetical protein                                                    | FIG00824548 | ff                                                                  |
| fig 6666666.28482.peg.5421 | Contig_74 | 55767 | 54616 | - | Glycogen debranching<br>enzyme (EC 3.2.1.-)                                             | FIG00109688 | icw(1);Trehalose_Biosynthesis<br>icw(1);Glycogen_metabolism         |
| fig 6666666.28482.peg.5422 | Contig_74 | 56713 | 55838 | - | Glycogen debranching<br>enzyme (EC 3.2.1.-)                                             | FIG00109688 | icw(1);Trehalose_Biosynthesis<br>icw(1);Glycogen_metabolism         |
| fig 6666666.28482.peg.5423 | Contig_74 | 57408 | 56713 | - | rhomboid family protein                                                                 |             |                                                                     |
| fig 6666666.28482.peg.5424 | Contig_74 | 57681 | 57968 | + | hypothetical protein                                                                    |             |                                                                     |
| fig 6666666.28482.peg.5425 | Contig_74 | 59052 | 57973 | - | Glycerol-3-phosphate<br>ABC transporter, ATP-<br>binding protein UgpC (TC<br>3.A.1.1.3) | FIG00027233 | idu(1);Glycerol_and_Glycerol-3-<br>phosphate_Uptake_and_Utilization |
| fig 6666666.28482.peg.5426 | Contig_74 | 59897 | 59055 | - | Probable sugar-transport<br>integral membrane<br>protein ABC transporter                | FIG01319682 | ff                                                                  |
| fig 6666666.28482.peg.5427 | Contig_74 | 60795 | 59884 | - | Probable sugar-transport<br>integral membrane<br>protein ABC transporter                | FIG01319682 | ff                                                                  |
| fig 6666666.28482.peg.5428 | Contig_74 | 62114 | 60792 | - | Probable sugar-binding<br>lipoprotein                                                   | FIG01402923 | ff                                                                  |
| fig 6666666.28482.peg.5429 | Contig_74 | 63099 | 62104 | - | putative sigma factor                                                                   | FIG01124738 | ff                                                                  |
| fig 6666666.28482.peg.5430 | Contig_74 | 63260 | 63628 | + | FIG00824060:<br>hypothetical protein                                                    | FIG00824059 | ff                                                                  |
| fig 6666666.28482.peg.5431 | Contig_74 | 64267 | 63635 | - | hypothetical protein                                                                    | FIG00638284 | ff                                                                  |
| fig 6666666.28482.peg.5432 | Contig_74 | 65203 | 64379 | - | Putative uncharacterized<br>protein BCG_2061c                                           | FIG01350741 | ff                                                                  |

|                            |           |       |       |   |                                                         |             |                                                                                                         |
|----------------------------|-----------|-------|-------|---|---------------------------------------------------------|-------------|---------------------------------------------------------------------------------------------------------|
| fig 6666666.28482.peg.5433 | Contig_74 | 65772 | 65203 | - | Nicotinamidase (EC 3.5.1.19)                            | FIG00067300 | idu(1);NAD_and_NADP_cofactor_biosynthesis_global idu(1);Redox-dependent_regulation_of_nucleus_processes |
| fig 6666666.28482.peg.5434 | Contig_74 | 65871 | 66851 | + | FIG00824845: hypothetical protein                       | FIG00824843 | ff                                                                                                      |
| fig 6666666.28482.peg.5435 | Contig_74 | 67436 | 66858 | - | FIG027960: hypothetical protein                         | FIG01314328 | ff                                                                                                      |
| fig 6666666.28482.peg.5436 | Contig_74 | 67838 | 67449 | - | FIG00824223: hypothetical protein                       | FIG01310830 | ff                                                                                                      |
| fig 6666666.28482.peg.5437 | Contig_74 | 68397 | 67927 | - | Gluconokinase (EC 2.7.1.12)                             | FIG00000861 | isu;D-gluconate_and_ketogluconates_metabolism                                                           |
| fig 6666666.28482.peg.5438 | Contig_74 | 70412 | 68415 | - | FIG00822903: hypothetical protein                       | FIG00822898 | ff                                                                                                      |
| fig 6666666.28482.peg.5439 | Contig_74 | 71937 | 70432 | - | Probable carboxylesterase LipT (EC 3.1.1.-)             | FIG00825422 | ff                                                                                                      |
| fig 6666666.28482.peg.5440 | Contig_74 | 72018 | 72695 | + | Probable lipoprotein lppI                               | FIG01340654 | ff                                                                                                      |
| fig 6666666.28482.peg.5441 | Contig_74 | 72736 | 73590 | + | hypothetical protein                                    |             |                                                                                                         |
| fig 6666666.28482.peg.5442 | Contig_74 | 74571 | 73594 | - | Short-chain dehydrogenase/reductase SDR                 | FIG00546160 | idu(13);CBSS-164757.7.peg.5020 idu(13);Transcription_repair_cluster                                     |
| fig 6666666.28482.peg.5443 | Contig_74 | 75650 | 74568 | - | putative cytochrome P450 hydroxylase                    | FIG00032437 | idu(49);Nitric_oxide_synthase                                                                           |
| fig 6666666.28482.peg.5444 | Contig_74 | 75876 | 76505 | + | Transcriptional regulator, TetR family                  | FIG00554417 | ff                                                                                                      |
| fig 6666666.28482.peg.5445 | Contig_74 | 77264 | 76512 | - | short-chain dehydrogenase/reductase SDR( EC:1.1.1.275 ) |             |                                                                                                         |

|                            |           |       |       |   |                                                                       |             |                              |
|----------------------------|-----------|-------|-------|---|-----------------------------------------------------------------------|-------------|------------------------------|
| fig 6666666.28482.peg.5446 | Contig_74 | 78400 | 77327 | - | FIG00821560:<br>hypothetical protein                                  | FIG00821559 | ff                           |
| fig 6666666.28482.peg.5447 | Contig_74 | 79217 | 78429 | - | Oxidoreductase, short-<br>chain<br>dehydrogenase/reductas<br>e family | FIG00824296 | ff                           |
| fig 6666666.28482.peg.5448 | Contig_74 | 79434 | 80027 | + | Transcriptional regulator,<br>TetR family                             | FIG00554417 | ff                           |
| fig 6666666.28482.peg.5449 | Contig_74 | 81147 | 80044 | - | FIG00825548:<br>hypothetical protein                                  | FIG00825545 | ff                           |
| fig 6666666.28482.peg.5450 | Contig_74 | 81422 | 82132 | + | FIG00820766:<br>hypothetical protein                                  | FIG00820765 | ff                           |
| fig 6666666.28482.peg.5451 | Contig_74 | 82275 | 83804 | + | MorD                                                                  | FIG01424540 | ff                           |
| fig 6666666.28482.peg.5452 | Contig_74 | 83801 | 84583 | + | ATPase                                                                | FIG01499921 | ff                           |
| fig 6666666.28482.peg.5453 | Contig_74 | 84599 | 84727 | + | FIG00820854:<br>hypothetical protein                                  | FIG00820853 | ff                           |
| fig 6666666.28482.peg.5454 | Contig_74 | 84724 | 85431 | + | FIG00822652:<br>hypothetical protein                                  | FIG00822651 | ff                           |
| fig 6666666.28482.peg.5455 | Contig_74 | 85445 | 85873 | + | FIG00825075:<br>hypothetical protein                                  | FIG00825071 | ff                           |
| fig 6666666.28482.peg.5456 | Contig_74 | 85921 | 86925 | + | FIG00832047:<br>hypothetical protein                                  | FIG00832041 | ff                           |
| fig 6666666.28482.peg.5457 | Contig_74 | 86946 | 87362 | + | FIG00826460:<br>hypothetical protein                                  | FIG00826459 | ff                           |
| fig 6666666.28482.peg.5458 | Contig_74 | 87359 | 88600 | + | putative cytochrome<br>P450 hydroxylase                               | FIG00032437 | icw(2);Nitric_oxide_synthase |
| fig 6666666.28482.peg.5459 | Contig_74 | 88780 | 88577 | - | hypothetical protein                                                  |             |                              |
| fig 6666666.28482.peg.5460 | Contig_74 | 90198 | 88891 | - | putative cytochrome<br>P450 hydroxylase                               | FIG00032437 | icw(2);Nitric_oxide_synthase |
| fig 6666666.28482.peg.5461 | Contig_74 | 91652 | 90453 | - | putative cytochrome<br>P450 hydroxylase                               | FIG00032437 | icw(3);Nitric_oxide_synthase |
| fig 6666666.28482.peg.5462 | Contig_74 | 92032 | 92634 | + | Transcriptional regulator,<br>TetR family                             |             |                              |

|                            |           |        |        |   |                                                                                                                    |             |                                                                       |
|----------------------------|-----------|--------|--------|---|--------------------------------------------------------------------------------------------------------------------|-------------|-----------------------------------------------------------------------|
| fig 6666666.28482.peg.5463 | Contig_74 | 93301  | 92744  | - | transcriptional regulator,<br>TetR family                                                                          |             |                                                                       |
| fig 6666666.28482.peg.5464 | Contig_74 | 93428  | 94324  | + | Short chain<br>dehydrogenase                                                                                       | FIG01310822 | ff                                                                    |
| fig 6666666.28482.peg.5465 | Contig_74 | 94350  | 94658  | + | hypothetical protein                                                                                               |             |                                                                       |
| fig 6666666.28482.peg.5466 | Contig_74 | 94667  | 95965  | + | putative cytochrome<br>P450 hydroxylase                                                                            | FIG00032437 | icw(1);Nitric_oxide_synthase                                          |
| fig 6666666.28482.peg.5467 | Contig_74 | 98551  | 96020  | - | Phosphoenolpyruvate<br>synthase (EC 2.7.9.2)                                                                       | FIG00000789 | idu(2);Pyruvate_metabolism_l:_anapl<br>erotic_reactions,_PEP          |
| fig 6666666.28482.peg.5468 | Contig_74 | 111073 | 98591  | - | Malonyl CoA-acyl carrier<br>protein transacylase (EC<br>2.3.1.39)                                                  | FIG00000319 | idu(7);Fatty_Acid_Biosynthesis_FASII                                  |
| fig 6666666.28482.peg.5469 | Contig_74 | 111698 | 111396 | - | FIG00822025:<br>hypothetical protein                                                                               | FIG00822024 | ff                                                                    |
| fig 6666666.28482.peg.5470 | Contig_74 | 111967 | 111758 | - | hypothetical protein                                                                                               |             |                                                                       |
| fig 6666666.28482.peg.5471 | Contig_74 | 111941 | 112237 | + | FIG00820327:<br>hypothetical protein                                                                               | FIG00485890 | icw(3);Lipid-<br>linked_oligosaccharide_synthesis_rel<br>ated_cluster |
| fig 6666666.28482.peg.5472 | Contig_74 | 113028 | 112234 | - | Dolichol-phosphate<br>mannosyltransferase (EC<br>2.4.1.83) in lipid-linked<br>oligosaccharide synthesis<br>cluster | FIG00543846 | idu(1);Lipid-<br>linked_oligosaccharide_synthesis_rel<br>ated_cluster |
| fig 6666666.28482.peg.5473 | Contig_74 | 115016 | 113025 | - | Apolipoprotein N-<br>acyltransferase (EC 2.3.1.-<br>) in lipid-linked<br>oligosaccharide synthesis<br>cluster      | FIG01122388 | icw(2);Lipid-<br>linked_oligosaccharide_synthesis_rel<br>ated_cluster |

|                            |           |        |        |   |                                                                                      |             |                                                                                                                                                                                                                                   |
|----------------------------|-----------|--------|--------|---|--------------------------------------------------------------------------------------|-------------|-----------------------------------------------------------------------------------------------------------------------------------------------------------------------------------------------------------------------------------|
| fig 6666666.28482.peg.5474 | Contig_74 | 116610 | 115009 | - | Exoenzymes regulatory protein AepA in lipid-linked oligosaccharide synthesis cluster | FIG01310319 | icw(1);Lipid-linked_oligosaccharide_synthesis_related_cluster                                                                                                                                                                     |
| fig 6666666.28482.peg.5475 | Contig_75 | 34     | 420    | + | Selenocysteine-specific translation elongation factor                                | FIG00001280 | isu;Selenocysteine_metabolism                                                                                                                                                                                                     |
| fig 6666666.28482.peg.5476 | Contig_75 | 2595   | 421    | - | membrane protein-like protein                                                        |             |                                                                                                                                                                                                                                   |
| fig 6666666.28482.peg.5477 | Contig_75 | 3139   | 2675   | - | Transamidase GatB domain protein                                                     | FIG00012764 | ff                                                                                                                                                                                                                                |
| fig 6666666.28482.peg.5478 | Contig_75 | 3261   | 4472   | + | putative integral membrane protein                                                   | FIG00761799 | ff                                                                                                                                                                                                                                |
| fig 6666666.28482.peg.5479 | Contig_75 | 4485   | 5138   | + | PROBABLE CONSERVED MEMBRANE PROTEIN                                                  | FIG00662487 | ff                                                                                                                                                                                                                                |
| fig 6666666.28482.peg.5480 | Contig_75 | 5162   | 6277   | + | FIG00818282: hypothetical protein                                                    | FIG00512629 | ff                                                                                                                                                                                                                                |
| fig 6666666.28482.peg.5481 | Contig_75 | 6274   | 7242   | + | MoxR-like ATPase                                                                     | FIG00820883 | ff                                                                                                                                                                                                                                |
| fig 6666666.28482.peg.5482 | Contig_75 | 7242   | 8564   | + | Cell division protein DivIC (FtsB), stabilizes FtsL against RasP cleavage            | FIG00485194 | icw(1);Possible_new_toxin-antitoxin_system_including_DivIC<br>icw(1);Bacterial_Cell_Division<br>icw(1);Cell_division-ribosomal_stress_proteins_cluster<br>icw(1);Bacterial_Cytoskeleton<br>icw(1);Stationary_phase_repair_cluster |
| fig 6666666.28482.peg.5483 | Contig_75 | 9628   | 8636   | - | POSSIBLE CONSERVED TRANSMEMBRANE PROTEIN                                             | FIG01417063 | ff                                                                                                                                                                                                                                |

|                            |           |       |       |   |                                                                           |             |                                                                                                                                                                                                                                   |
|----------------------------|-----------|-------|-------|---|---------------------------------------------------------------------------|-------------|-----------------------------------------------------------------------------------------------------------------------------------------------------------------------------------------------------------------------------------|
| fig 6666666.28482.peg.5484 | Contig_75 | 9674  | 10573 | + | Cell division protein DivIC (FtsB), stabilizes FtsL against RasP cleavage | FIG00485194 | icw(1);Possible_new_toxin-antitoxin_system_including_DivIC<br>icw(1);Bacterial_Cell_Division<br>icw(1);Cell_division-ribosomal_stress_proteins_cluster<br>icw(1);Bacterial_Cytoskeleton<br>icw(1);Stationary_phase_repair_cluster |
| fig 6666666.28482.peg.5485 | Contig_75 | 11093 | 10704 | - | FIG00823559: hypothetical protein                                         | FIG00823558 | ff                                                                                                                                                                                                                                |
| fig 6666666.28482.peg.5486 | Contig_75 | 11305 | 12006 | + | Transcriptional regulator, PadR family                                    | FIG00002474 | idu(4);CBSS-1352.1.peg.856                                                                                                                                                                                                        |
| fig 6666666.28482.peg.5487 | Contig_75 | 13557 | 12031 | - | Glycerol kinase (EC 2.7.1.30)                                             | FIG00075702 | isu;Glycerol_and_Glycerol-3-phosphate_Uptake_and_Utilization<br>isu;Glycerolipid_and_Glycerophospholipid_Metabolism_in_Bacteria                                                                                                   |
| fig 6666666.28482.peg.5488 | Contig_75 | 13682 | 15154 | + | FIG00820887: hypothetical protein                                         | FIG00820886 | ff                                                                                                                                                                                                                                |
| fig 6666666.28482.peg.5489 | Contig_75 | 15162 | 15851 | + | Methyltransferase (EC 2.1.1.-)                                            | FIG00515945 | ff                                                                                                                                                                                                                                |
| fig 6666666.28482.peg.5490 | Contig_75 | 16994 | 15876 | - | PE-PGRS family protein                                                    |             | idu(16);PPE_gene_cluster_in_Mycobacteria                                                                                                                                                                                          |
| fig 6666666.28482.peg.5491 | Contig_75 | 18679 | 17273 | - | PPE family protein                                                        | FIG00013075 | idu(57);CBSS-164757.7.peg.5020                                                                                                                                                                                                    |
| fig 6666666.28482.peg.5492 | Contig_75 | 18808 | 18692 | - | hypothetical protein                                                      |             |                                                                                                                                                                                                                                   |
| fig 6666666.28482.peg.5493 | Contig_75 | 20118 | 18976 | - | Selenocysteine lyase, CsdB                                                | FIG01319544 | ff                                                                                                                                                                                                                                |
| fig 6666666.28482.peg.5494 | Contig_75 | 21080 | 20115 | - | ABC transporter ATP-binding protein                                       | FIG01956052 | ff                                                                                                                                                                                                                                |
| fig 6666666.28482.peg.5495 | Contig_75 | 21775 | 21077 | - | Glutamine amidotransferases class-II                                      | FIG00995765 | ff                                                                                                                                                                                                                                |

|                            |           |       |       |   |                                                                                |             |                                                                                                  |
|----------------------------|-----------|-------|-------|---|--------------------------------------------------------------------------------|-------------|--------------------------------------------------------------------------------------------------|
| fig 6666666.28482.peg.5496 | Contig_75 | 23040 | 21775 | - | Serine/threonine kinase                                                        | FIG00659720 | ff                                                                                               |
| fig 6666666.28482.peg.5497 | Contig_75 | 24335 | 23067 | - | Similar to Glutamate--<br>cysteine ligase (EC<br>6.3.2.2), function<br>unknown | FIG00816555 | ff                                                                                               |
| fig 6666666.28482.peg.5498 | Contig_75 | 24306 | 24509 | + | hypothetical protein                                                           |             |                                                                                                  |
| fig 6666666.28482.peg.5499 | Contig_75 | 25156 | 24503 | - | FIG00820305:<br>hypothetical protein                                           | FIG00820304 | ff                                                                                               |
| fig 6666666.28482.peg.5500 | Contig_75 | 25751 | 25536 | - | hypothetical protein                                                           |             |                                                                                                  |
| fig 6666666.28482.peg.5501 | Contig_75 | 26236 | 25880 | - | FIG00820599:<br>hypothetical protein                                           | FIG00820598 | ff                                                                                               |
| fig 6666666.28482.peg.5502 | Contig_75 | 26735 | 26490 | - | hypothetical protein                                                           |             |                                                                                                  |
| fig 6666666.28482.peg.5503 | Contig_76 | 81    | 242   | + | hypothetical protein                                                           |             |                                                                                                  |
| fig 6666666.28482.peg.5504 | Contig_76 | 485   | 5068  | + | Glutamate synthase<br>[NADPH] large chain (EC<br>1.4.1.13)                     | FIG00000539 | isu;Glutamine,_Glutamate,_Aspartate_and_Aspargine_Biosynthesis<br>isu;Ammonia_assimilation       |
| fig 6666666.28482.peg.5505 | Contig_76 | 5061  | 6527  | + | Glutamate synthase<br>[NADPH] small chain (EC<br>1.4.1.13)                     | FIG00007957 | icw(1);Glutamine,_Glutamate,_Aspartate_and_Aspargine_Biosynthesis<br>icw(1);Ammonia_assimilation |
| fig 6666666.28482.peg.5506 | Contig_76 | 6682  | 6822  | + | FIG00820244:<br>hypothetical protein                                           | FIG00820243 | ff                                                                                               |
| fig 6666666.28482.peg.5507 | Contig_76 | 7750  | 6899  | - | Coenzyme F420-<br>dependent<br>oxidoreductase                                  | FIG00015014 | idu(3);Anaerobic_respiratory_reductases                                                          |
| fig 6666666.28482.peg.5508 | Contig_76 | 7802  | 8233  | + | FIG00821842:<br>hypothetical protein                                           | FIG00821841 | ff                                                                                               |
| fig 6666666.28482.peg.5509 | Contig_76 | 8325  | 9266  | + | DNA-dependent DNA<br>polymerase beta chain                                     | FIG00826878 | ff                                                                                               |
| fig 6666666.28482.peg.5510 | Contig_77 | 817   | 425   | - | Probable tautomerase<br>yrdN (EC 5.3.2.-)                                      | FIG01659308 | ff                                                                                               |

|                            |           |       |       |   |                                                                         |             |                                                                                                                                                                    |
|----------------------------|-----------|-------|-------|---|-------------------------------------------------------------------------|-------------|--------------------------------------------------------------------------------------------------------------------------------------------------------------------|
| fig 6666666.28482.peg.5511 | Contig_77 | 911   | 1804  | + | LysR family<br>transcriptional regulator                                | FIG01330236 | ff                                                                                                                                                                 |
| fig 6666666.28482.peg.5512 | Contig_77 | 2644  | 1871  | - | alpha/beta hydrolase fold                                               |             |                                                                                                                                                                    |
| fig 6666666.28482.peg.5513 | Contig_77 | 2762  | 3094  | + | hypothetical protein                                                    |             |                                                                                                                                                                    |
| fig 6666666.28482.peg.5514 | Contig_77 | 3091  | 3639  | + | transcriptional regulator,<br>TetR family                               |             |                                                                                                                                                                    |
| fig 6666666.28482.peg.5515 | Contig_77 | 4493  | 3636  | - | hypothetical protein                                                    | FIG00638284 | ff                                                                                                                                                                 |
| fig 6666666.28482.peg.5516 | Contig_77 | 5112  | 4513  | - | Phosphatidylethanolamin<br>e-binding protein                            | FIG00822182 | ff                                                                                                                                                                 |
| fig 6666666.28482.peg.5517 | Contig_77 | 5608  | 5165  | - | FIG00826419:<br>hypothetical protein                                    | FIG00826417 | ff                                                                                                                                                                 |
| fig 6666666.28482.peg.5518 | Contig_77 | 6666  | 5644  | - | Oxidoreductase FadB5                                                    | FIG01332653 | ff                                                                                                                                                                 |
| fig 6666666.28482.peg.5519 | Contig_77 | 7084  | 6680  | - | FIG00821341:<br>hypothetical protein                                    | FIG00821340 | ff                                                                                                                                                                 |
| fig 6666666.28482.peg.5520 | Contig_77 | 7395  | 7081  | - | Transcriptional regulator,<br>ArsR family                               | FIG00003845 | idu(3);CBSS-1085.1.peg.1363                                                                                                                                        |
| fig 6666666.28482.peg.5521 | Contig_77 | 7485  | 8207  | + | Fumarylacetoacetase (EC<br>3.7.1.2)                                     | FIG00001596 | idu(1);Homogentisate_pathway_of_a<br>romatic_compound_degradation<br>idu(1);Pterin_carbinolamine_dehydra<br>tase<br>idu(1);Salicylate_and_gentisate_cata<br>bolism |
| fig 6666666.28482.peg.5522 | Contig_77 | 8578  | 8204  | - | FIG00820307:<br>hypothetical protein                                    | FIG00820306 | ff                                                                                                                                                                 |
| fig 6666666.28482.peg.5523 | Contig_77 | 8742  | 11030 | + | Isocitrate lyase (EC<br>4.1.3.1), group III,<br>Mycobacterial type ICL2 | FIG00113839 | isu;Glyoxylate_bypass                                                                                                                                              |
| fig 6666666.28482.peg.5524 | Contig_77 | 11063 | 11239 | + | hypothetical protein                                                    |             |                                                                                                                                                                    |
| fig 6666666.28482.peg.5525 | Contig_78 | 3     | 161   | + | hypothetical protein                                                    |             |                                                                                                                                                                    |

|                            |           |       |       |   |                                                     |             |                                         |
|----------------------------|-----------|-------|-------|---|-----------------------------------------------------|-------------|-----------------------------------------|
| fig 6666666.28482.peg.5526 | Contig_78 | 661   | 236   | - | Molybdenum cofactor biosynthesis protein MoaE       | FIG00018405 | icw(1);Molybdenum_cofactor_biosynthesis |
| fig 6666666.28482.peg.5527 | Contig_78 | 1140  | 658   | - | Molybdenum cofactor biosynthesis protein MoaB       | FIG00032229 | icw(2);Molybdenum_cofactor_biosynthesis |
| fig 6666666.28482.peg.5528 | Contig_78 | 1565  | 1140  | - | Molybdenum cofactor biosynthesis protein MoaC       | FIG00053487 | isu;Molybdenum_cofactor_biosynthesis    |
| fig 6666666.28482.peg.5529 | Contig_78 | 1853  | 1644  | - | FIG057355: hypothetical protein                     | FIG01311512 | ff                                      |
| fig 6666666.28482.peg.5530 | Contig_78 | 1950  | 4202  | + | probable DNA-binding protein                        | FIG00666011 | ff                                      |
| fig 6666666.28482.peg.5531 | Contig_78 | 4264  | 5913  | + | DNA repair helicase                                 | FIG00544450 | ff                                      |
| fig 6666666.28482.peg.5532 | Contig_78 | 7153  | 6008  | - | Nonspecific lipid-transfer protein                  | FIG01353572 | ff                                      |
| fig 6666666.28482.peg.5533 | Contig_78 | 7633  | 7220  | - | FIG00826442: hypothetical protein                   | FIG00826438 | ff                                      |
| fig 6666666.28482.peg.5534 | Contig_78 | 7951  | 8244  | + | FIG00821729: hypothetical protein                   | FIG00821728 | ff                                      |
| fig 6666666.28482.peg.5535 | Contig_78 | 9230  | 8241  | - | Luciferase family protein                           | FIG00823277 | ff                                      |
| fig 6666666.28482.peg.5536 | Contig_78 | 9325  | 9567  | + | hypothetical protein                                |             |                                         |
| fig 6666666.28482.peg.5537 | Contig_78 | 9609  | 10817 | + | Oxidoreductase                                      | FIG01321859 | ff                                      |
| fig 6666666.28482.peg.5538 | Contig_78 | 10838 | 11695 | + | FIG00825180: hypothetical protein                   | FIG00825179 | ff                                      |
| fig 6666666.28482.peg.5539 | Contig_79 | 19    | 243   | + | Protein-export membrane protein SecD (TC 3.A.5.1.1) | FIG00001617 | ff                                      |
| fig 6666666.28482.peg.5540 | Contig_79 | 247   | 1497  | + | Protein-export membrane protein SecF (TC 3.A.5.1.1) | FIG00000468 | ff                                      |

|                            |           |       |       |   |                                                                                            |             |                                                                                                                     |
|----------------------------|-----------|-------|-------|---|--------------------------------------------------------------------------------------------|-------------|---------------------------------------------------------------------------------------------------------------------|
| fig 6666666.28482.peg.5541 | Contig_79 | 1503  | 3161  | + | Oligopeptide ABC transporter, periplasmic oligopeptide-binding protein OppA (TC 3.A.1.5.1) | FIG00451095 | isu;ABC_transporter_oligopeptide_(TC_3.A.1.5.1)<br>isu;Sex_pheromones_in_Enterococcus_faecalis_and_other_Firmicutes |
| fig 6666666.28482.peg.5542 | Contig_79 | 3193  | 3699  | + | Adenine phosphoribosyltransferase (EC 2.4.2.7)                                             | FIG00000277 | isu;Purine_conversions<br>icw(1);cAMP_signaling_in_bacteria                                                         |
| fig 6666666.28482.peg.5543 | Contig_79 | 3729  | 6122  | + | GTP pyrophosphokinase (EC 2.7.6.5), (p)ppGpp synthetase I                                  | FIG00047414 | isu;Stringent_Response,(p)ppGpp_metabolism                                                                          |
| fig 6666666.28482.peg.5544 | Contig_79 | 6487  | 6119  | - | hypothetical protein                                                                       |             |                                                                                                                     |
| fig 6666666.28482.peg.5545 | Contig_79 | 6634  | 9810  | + | Adenylate cyclase (EC 4.6.1.1)                                                             | FIG00001294 | idu(25);cAMP_signaling_in_bacteria                                                                                  |
| fig 6666666.28482.peg.5546 | Contig_79 | 11216 | 9807  | - | PE-PGRS family protein                                                                     |             | idu(16);PPE_gene_cluster_in_Mycobacteria                                                                            |
| fig 6666666.28482.peg.5547 | Contig_79 | 13602 | 12142 | - | Alpha,alpha-trehalose-phosphate synthase [UDP-forming] (EC 2.4.1.15)                       | FIG00001100 | isu;Trehalose_Biosynthesis                                                                                          |
| fig 6666666.28482.peg.5548 | Contig_79 | 13731 | 13603 | - | FIG00820754: hypothetical protein                                                          | FIG00820753 | ff                                                                                                                  |
| fig 6666666.28482.peg.5549 | Contig_79 | 15315 | 13825 | - | Amine oxidase [flavin-containing] A (EC 1.4.3.4)                                           |             |                                                                                                                     |

|                            |           |       |       |   |                                                                                                      |             |                                                                                                                                                                                                                                                                                                                          |
|----------------------------|-----------|-------|-------|---|------------------------------------------------------------------------------------------------------|-------------|--------------------------------------------------------------------------------------------------------------------------------------------------------------------------------------------------------------------------------------------------------------------------------------------------------------------------|
| fig 6666666.28482.peg.5550 | Contig_79 | 15561 | 16478 | + | Enoyl-CoA hydratase (EC 4.2.1.17)                                                                    | FIG00033206 | idu(51);n-Phenylalkanoic_acid_degradation idu(51);Polyhydroxybutyrate_metabolism idu(51);Isoleucine_degradation idu(51);Fatty_acid_metabolism_cluster idu(51);Lysine_fermentation idu(51);Butanol_Biosynthesis idu(51);Acetyl-CoA_fermentation_to_Butyrate icw(1);Valine_degradation idu(51);Butyrate_metabolism_cluster |
| fig 6666666.28482.peg.5551 | Contig_79 | 16552 | 17382 | + | short chain dehydrogenase                                                                            | FIG01311525 | ff                                                                                                                                                                                                                                                                                                                       |
| fig 6666666.28482.peg.5552 | Contig_79 | 18255 | 17365 | - | 3-hydroxyisobutyrate dehydrogenase (EC 1.1.1.31)                                                     | FIG00021583 | idu(3);Valine_degradation                                                                                                                                                                                                                                                                                                |
| fig 6666666.28482.peg.5553 | Contig_79 | 18321 | 19112 | + | Dehydrogenases with different specificities (related to short-chain alcohol dehydrogenases)          | FIG00975245 | ff                                                                                                                                                                                                                                                                                                                       |
| fig 6666666.28482.peg.5554 | Contig_79 | 20687 | 19131 | - | Cell envelope-associated transcriptional attenuator LytR-CpsA-Psr, subfamily A1 (as in PMID19099556) | FIG00025213 | idu(3);Cell_envelope-associated_LytR-CpsA-Psr_transcriptional_attenuators                                                                                                                                                                                                                                                |
| fig 6666666.28482.peg.5555 | Contig_79 | 21326 | 20976 | - | hypothetical protein                                                                                 |             |                                                                                                                                                                                                                                                                                                                          |

|                            |           |       |       |   |                                                                         |             |                                                                                                                                                     |
|----------------------------|-----------|-------|-------|---|-------------------------------------------------------------------------|-------------|-----------------------------------------------------------------------------------------------------------------------------------------------------|
| fig 6666666.28482.peg.5556 | Contig_79 | 21628 | 21368 | - | FIG00823724:<br>hypothetical protein                                    | FIG01487565 | ff                                                                                                                                                  |
| fig 6666666.28482.peg.5557 | Contig_79 | 21710 | 22456 | + | FIG00825022:<br>hypothetical protein                                    | FIG00825021 | ff                                                                                                                                                  |
| fig 6666666.28482.peg.5558 | Contig_79 | 22636 | 22779 | + | hypothetical protein                                                    |             |                                                                                                                                                     |
| fig 6666666.28482.peg.5559 | Contig_79 | 22808 | 22984 | + | hypothetical protein                                                    |             |                                                                                                                                                     |
| fig 6666666.28482.peg.5560 | Contig_79 | 23046 | 23918 | + | Peroxidase BpoA                                                         | FIG01321097 | ff                                                                                                                                                  |
| fig 6666666.28482.peg.5561 | Contig_79 | 25422 | 23896 | - | INTEGRAL MEMBRANE<br>PROTEIN (Rhomboid<br>family)                       | FIG00525068 | ff                                                                                                                                                  |
| fig 6666666.28482.peg.5562 | Contig_79 | 26504 | 25491 | - | 2,3-dihydroxybiphenyl<br>1,2-dioxygenase                                | FIG00004009 | ff                                                                                                                                                  |
| fig 6666666.28482.peg.5563 | Contig_79 | 27413 | 26532 | - | 2-hydroxy-6-oxo-6-<br>phenylhexa-2,4-dienoate<br>hydrolase (EC 3.7.1.-) | FIG00003780 | idu(2);carbazol_degradation_cluster<br>idu(2);Central_meta-<br>cleavage_pathway_of_aromatic_com<br>pound_degradation<br>idu(2);Biphenyl_Degradation |
| fig 6666666.28482.peg.5564 | Contig_79 | 28971 | 27424 | - | 3-(3-hydroxy-<br>phenyl)propionate<br>hydroxylase (EC 1.14.13.-<br>)    | FIG00138127 | idu(3);Cinnamic_Acid_Degradation                                                                                                                    |
| fig 6666666.28482.peg.5565 | Contig_79 | 29060 | 29716 | + | Transcriptional regulator,<br>TetR family                               | FIG00554417 | ff                                                                                                                                                  |
| fig 6666666.28482.peg.5566 | Contig_79 | 29713 | 30510 | + | 2-oxopent-4-dienoate<br>hydratase                                       | FIG00821141 | ff                                                                                                                                                  |

|                            |           |       |       |   |                                                                                                                      |             |                                                                                                      |
|----------------------------|-----------|-------|-------|---|----------------------------------------------------------------------------------------------------------------------|-------------|------------------------------------------------------------------------------------------------------|
| fig 6666666.28482.peg.5567 | Contig_79 | 30522 | 31469 | + | Acetaldehyde dehydrogenase, acetylating, (EC 1.2.1.10) in gene cluster for degradation of phenols, cresols, catechol | FIG00002495 | icw(1);Central_meta-cleavage_pathway_of_aromatic_compound_degradation<br>icw(1);Biphenyl_Degradation |
| fig 6666666.28482.peg.5568 | Contig_79 | 31472 | 32488 | + | 4-hydroxy-2-oxovalerate aldolase (EC 4.1.3.-)                                                                        | FIG00001725 | ff                                                                                                   |
| fig 6666666.28482.peg.5569 | Contig_79 | 33703 | 32516 | - | hypothetical protein                                                                                                 |             |                                                                                                      |
| fig 6666666.28482.peg.5570 | Contig_79 | 33975 | 34571 | + | integral membrane protein                                                                                            |             |                                                                                                      |
| fig 6666666.28482.peg.5571 | Contig_79 | 34579 | 34830 | + | hypothetical protein                                                                                                 |             |                                                                                                      |
| fig 6666666.28482.peg.5572 | Contig_79 | 34988 | 35611 | + | FIG00826434:                                                                                                         | FIG00826431 | ff                                                                                                   |
|                            |           |       |       |   | hypothetical protein                                                                                                 |             |                                                                                                      |
| fig 6666666.28482.peg.5573 | Contig_79 | 35743 | 36210 | + | FIG00828898:                                                                                                         | FIG00828897 | ff                                                                                                   |
|                            |           |       |       |   | hypothetical protein                                                                                                 |             |                                                                                                      |
| fig 6666666.28482.peg.5574 | Contig_79 | 36255 | 37124 | + | hypothetical protein                                                                                                 | FIG00638284 | ff                                                                                                   |
| fig 6666666.28482.peg.5575 | Contig_79 | 37227 | 38006 | + | enoyl-CoA dehydratase, EchA8_3                                                                                       |             |                                                                                                      |
| fig 6666666.28482.peg.5576 | Contig_79 | 38115 | 39422 | + | PE-PGRS family protein                                                                                               |             | idu(16);PPE_gene_cluster_in_Mycobacteria                                                             |
| fig 6666666.28482.peg.5577 | Contig_79 | 40195 | 39419 | - | hypothetical protein                                                                                                 | FIG00638284 | ff                                                                                                   |
| fig 6666666.28482.peg.5578 | Contig_79 | 40357 | 40587 | + | hypothetical protein                                                                                                 | FIG00638284 | ff                                                                                                   |
| fig 6666666.28482.peg.5579 | Contig_79 | 40731 | 40588 | - | hypothetical protein                                                                                                 |             |                                                                                                      |
| fig 6666666.28482.peg.5580 | Contig_79 | 41003 | 41791 | + | serine esterase, cutinase family                                                                                     | FIG01335798 | ff                                                                                                   |
| fig 6666666.28482.rna.48   | Contig_79 | 42873 | 42945 | + | tRNA-Thr-TGT                                                                                                         |             |                                                                                                      |
| fig 6666666.28482.peg.5581 | Contig_79 | 43811 | 43068 | - | FIG00820010:                                                                                                         | FIG00820008 | ff                                                                                                   |
|                            |           |       |       |   | hypothetical protein                                                                                                 |             |                                                                                                      |

|                            |           |       |       |   |                                                            |             |                                                                                                                                          |
|----------------------------|-----------|-------|-------|---|------------------------------------------------------------|-------------|------------------------------------------------------------------------------------------------------------------------------------------|
| fig 6666666.28482.peg.5582 | Contig_79 | 44006 | 44677 | + | DNA-binding response regulator                             | FIG01031438 | ff                                                                                                                                       |
| fig 6666666.28482.peg.5583 | Contig_79 | 44706 | 46148 | + | PhoR                                                       | FIG00822385 | ff                                                                                                                                       |
| fig 6666666.28482.peg.5584 | Contig_79 | 46552 | 46136 | - | HIT family protein                                         | FIG00994683 | ff                                                                                                                                       |
| fig 6666666.28482.peg.5585 | Contig_79 | 46633 | 47280 | + | Dihydrofolate reductase (EC 1.5.1.3)                       | FIG00000048 | idu(3);Folate_Biosynthesis                                                                                                               |
| fig 6666666.28482.peg.5586 | Contig_79 | 47994 | 47572 | - | steroid isomerase, putative                                | FIG01310317 | ff                                                                                                                                       |
| fig 6666666.28482.peg.5587 | Contig_79 | 49977 | 48010 | - | 2,4-dienoyl-CoA reductase [NADPH] (EC 1.3.1.34)            | FIG00517072 | ff                                                                                                                                       |
| fig 6666666.28482.peg.5588 | Contig_79 | 51165 | 50038 | - | Alcohol dehydrogenase (EC 1.1.1.1)                         | FIG01007502 | idu(17);Glycerolipid_and_Glycerophospholipid_Metabolism_in_Bacteria<br>idu(17);Fermentations:_Mixed_acid<br>idu(17);Butanol_Biosynthesis |
| fig 6666666.28482.peg.5589 | Contig_79 | 51873 | 51319 | - | FIG00994119: hypothetical protein                          | FIG00820531 | ff                                                                                                                                       |
| fig 6666666.28482.peg.5590 | Contig_79 | 52085 | 51876 | - | Ferredoxin                                                 | FIG00001676 | idu(4);Soluble_cytochromes_and_functionally_related_electron_carriers<br>idu(4);Inorganic_Sulfur_Assimilation                            |
| fig 6666666.28482.peg.5591 | Contig_79 | 53453 | 52098 | - | Cytochrome P450 51                                         | FIG01316881 | ff                                                                                                                                       |
| fig 6666666.28482.peg.5592 | Contig_79 | 54274 | 53450 | - | oxidoreductase, short-chain dehydrogenase/reductase family | FIG01312329 | ff                                                                                                                                       |
| fig 6666666.28482.peg.5593 | Contig_79 | 55486 | 54275 | - | putative cytochrome P450 hydroxylase                       | FIG00032437 | idu(49);Nitric_oxide_synthase                                                                                                            |
| fig 6666666.28482.peg.5594 | Contig_79 | 56103 | 55483 | - | Transcriptional regulator, TetR family                     | FIG00554417 | ff                                                                                                                                       |

|                            |           |       |       |   |                                                           |             |                                                                                                                                                                             |
|----------------------------|-----------|-------|-------|---|-----------------------------------------------------------|-------------|-----------------------------------------------------------------------------------------------------------------------------------------------------------------------------|
| fig 6666666.28482.peg.5595 | Contig_79 | 56288 | 57757 | + | Aldehyde dehydrogenase (EC 1.2.1.3)                       | FIG01292786 | idu(16);Pyruvate_metabolism_II:_acetyl-CoA,_acetogenesis_from_pyruvate idu(16);Glycerolipid_and_Glycerophospholipid_Metabolism_in_Bacteria idu(16);Methylglyoxal_Metabolism |
| fig 6666666.28482.peg.5596 | Contig_79 | 57767 | 58516 | + | 3-oxoacyl-[acyl-carrier protein] reductase (EC 1.1.1.100) | FIG00621114 | idu(38);CBSS-246196.1.peg.364 idu(38);CBSS-164757.7.peg.5020 idu(38);Fatty_Acid_Biosynthesis_FASII                                                                          |
| fig 6666666.28482.peg.5597 | Contig_79 | 58565 | 59419 | + | 3-hydroxyisobutyrate dehydrogenase (EC 1.1.1.31)          | FIG00021583 | idu(3);Valine_degradation                                                                                                                                                   |
| fig 6666666.28482.peg.5598 | Contig_79 | 59431 | 59868 | + | 4-carboxymuconolactone decarboxylase (EC 4.1.1.44)        | FIG01304850 | idu(2);Protocatechuate_branch_of_beta-ketoadipate_pathway                                                                                                                   |
| fig 6666666.28482.peg.5599 | Contig_8  | 114   | 1079  | + | Transcriptional regulator, AraC family                    |             |                                                                                                                                                                             |
| fig 6666666.28482.peg.5600 | Contig_8  | 1643  | 1104  | - | hypothetical protein                                      |             |                                                                                                                                                                             |
| fig 6666666.28482.peg.5601 | Contig_8  | 2381  | 1719  | - | conserved hypothetical protein                            |             |                                                                                                                                                                             |
| fig 6666666.28482.peg.5602 | Contig_8  | 2577  | 2708  | + | hypothetical protein                                      |             |                                                                                                                                                                             |
| fig 6666666.28482.peg.5603 | Contig_8  | 3992  | 2778  | - | Carbon monoxide oxidation accessory protein CoxE          |             | isu;Carbon_monoxide_dehydrogenase_maturation_factors                                                                                                                        |
| fig 6666666.28482.peg.5604 | Contig_8  | 4661  | 3999  | - | carbon monoxide dehydrogenase G protein                   | FIG00001673 | ff                                                                                                                                                                          |

|                            |          |       |       |   |                                                                        |             |    |
|----------------------------|----------|-------|-------|---|------------------------------------------------------------------------|-------------|----|
| fig 6666666.28482.peg.5605 | Contig_8 | 5541  | 4675  | - | carbon monoxide<br>dehydrogenase D protein                             | FIG00029116 | ff |
| fig 6666666.28482.peg.5606 | Contig_8 | 6125  | 5541  | - | Uncharacterized MobA-<br>related protein                               | FIG00029967 | ff |
| fig 6666666.28482.peg.5607 | Contig_8 | 7021  | 6122  | - | Carbon monoxide<br>dehydrogenase F protein                             | FIG00006127 | ff |
| fig 6666666.28482.peg.5608 | Contig_8 | 9448  | 7055  | - | Carbon monoxide<br>dehydrogenase form I,<br>large chain( EC:1.2.99.2 ) | FIG01304852 | ff |
| fig 6666666.28482.peg.5609 | Contig_8 | 9921  | 9445  | - | Carbon monoxide<br>dehydrogenase small<br>chain (EC 1.2.99.2)          | FIG00525841 | ff |
| fig 6666666.28482.peg.5610 | Contig_8 | 10805 | 9924  | - | Carbon monoxide<br>dehydrogenase medium<br>chain (EC 1.2.99.2)         | FIG00513859 | ff |
| fig 6666666.28482.peg.5611 | Contig_8 | 12006 | 10837 | - | CO dehydrogenases<br>maturation factor, CoxF<br>family                 | FIG00024587 | ff |
| fig 6666666.28482.peg.5612 | Contig_8 | 12029 | 12994 | + | Transcription regulator in<br>CO-DH cluster                            | FIG00028984 | ff |
| fig 6666666.28482.peg.5613 | Contig_8 | 13688 | 13044 | - | probable RNA<br>methyltransferase                                      | FIG00945552 | ff |
| fig 6666666.28482.peg.5614 | Contig_8 | 14608 | 13685 | - | hypothetical protein<br>Rv0381c                                        | FIG01349032 | ff |
| fig 6666666.28482.peg.5615 | Contig_8 | 15327 | 14785 | - | Orotate<br>phosphoribosyltransferase<br>(EC 2.4.2.10)                  | FIG00025759 | ff |

|                            |          |       |       |   |                                                |             |                                                                                                                                |
|----------------------------|----------|-------|-------|---|------------------------------------------------|-------------|--------------------------------------------------------------------------------------------------------------------------------|
| fig 6666666.28482.peg.5616 | Contig_8 | 16084 | 15314 | - | Probable short-chain dehydrogenase             | FIG01324048 | ff                                                                                                                             |
| fig 6666666.28482.peg.5617 | Contig_8 | 16967 | 16119 | - | Possible membrane protein                      | FIG01121868 | ff                                                                                                                             |
| fig 6666666.28482.peg.5618 | Contig_8 | 19692 | 17146 | - | ClpB protein                                   | FIG00025216 | idu(1);Proteolysis_in_bacteria,_ATP-dependent idu(1);USS-DB-7<br>icw(2);Protein_chaperones<br>idu(1);Type_VI_secretion_systems |
| fig 6666666.28482.peg.5619 | Contig_8 | 19818 | 20969 | + | oxidoreductase, putative                       | FIG01339212 | ff                                                                                                                             |
| fig 6666666.28482.peg.5620 | Contig_8 | 20983 | 21873 | + | Aldose 1-epimerase                             | FIG01334418 | ff                                                                                                                             |
| fig 6666666.28482.peg.5621 | Contig_8 | 22421 | 21885 | - | hypothetical protein                           | FIG00638284 | ff                                                                                                                             |
| fig 6666666.28482.peg.5622 | Contig_8 | 22822 | 22430 | - | HspR, transcriptional repressor of DnaK operon | FIG00002442 | isu;Heat_shock_dnaK_gene_cluster_extended icw(1);Protein_chaperones                                                            |
| fig 6666666.28482.peg.5623 | Contig_8 | 24000 | 22822 | - | Chaperone protein DnaJ                         | FIG00000070 | icw(2);Heat_shock_dnaK_gene_cluster_extended<br>icw(3);Protein_chaperones                                                      |
| fig 6666666.28482.peg.5624 | Contig_8 | 24693 | 24055 | - | Heat shock protein GrpE                        | FIG00000103 | icw(3);Heat_shock_dnaK_gene_cluster_extended<br>idu(1);Protein_chaperones                                                      |
| fig 6666666.28482.peg.5625 | Contig_8 | 26558 | 24690 | - | Chaperone protein DnaK                         | FIG00023369 | icw(1);Heat_shock_dnaK_gene_cluster_extended<br>icw(2);Protein_chaperones                                                      |
| fig 6666666.28482.peg.5626 | Contig_8 | 27869 | 26955 | - | LysR-family transcriptional regulator          |             |                                                                                                                                |

|                            |          |       |       |   |                                                                                      |             |                                                                                                                                                                             |
|----------------------------|----------|-------|-------|---|--------------------------------------------------------------------------------------|-------------|-----------------------------------------------------------------------------------------------------------------------------------------------------------------------------|
| fig 6666666.28482.peg.5627 | Contig_8 | 28000 | 29490 | + | Aldehyde dehydrogenase (EC 1.2.1.3)                                                  | FIG01292786 | idu(16);Pyruvate_metabolism_II:_acetyl-CoA,_acetogenesis_from_pyruvate idu(16);Glycerolipid_and_Glycerophospholipid_Metabolism_in_Bacteria idu(16);Methylglyoxal_Metabolism |
| fig 6666666.28482.peg.5628 | Contig_8 | 29490 | 30446 | + | amidohydrolase 2                                                                     |             |                                                                                                                                                                             |
| fig 6666666.28482.peg.5629 | Contig_8 | 30443 | 31642 | + | cytochrome P450                                                                      |             |                                                                                                                                                                             |
| fig 6666666.28482.peg.5630 | Contig_8 | 31726 | 33174 | + | L-asparagine permease                                                                | FIG00554902 | ff                                                                                                                                                                          |
| fig 6666666.28482.peg.5631 | Contig_8 | 33638 | 33153 | - | CTP:molybdopterin cytidyltransferase                                                 | FIG00007638 | isu;Molybdopterin_cytosine_dinucleotide                                                                                                                                     |
| fig 6666666.28482.peg.5632 | Contig_8 | 33766 | 36102 | + | Carbon monoxide dehydrogenase large chain (EC 1.2.99.2) paralog without usual motifs | FIG01304853 | ff                                                                                                                                                                          |
| fig 6666666.28482.peg.5633 | Contig_8 | 36099 | 36998 | + | Carbon monoxide dehydrogenase medium chain (EC 1.2.99.2)                             | FIG00513859 | ff                                                                                                                                                                          |
| fig 6666666.28482.peg.5634 | Contig_8 | 36991 | 37476 | + | Carbon monoxide dehydrogenase small chain (EC 1.2.99.2)                              | FIG00525841 | ff                                                                                                                                                                          |
| fig 6666666.28482.peg.5635 | Contig_8 | 37581 | 38183 | + | Lipoprotein LpqJ                                                                     | FIG01320124 | ff                                                                                                                                                                          |
| fig 6666666.28482.peg.5636 | Contig_8 | 41386 | 38339 | - | Adenylate cyclase (EC 4.6.1.1)                                                       | FIG00001294 | idu(25);cAMP_signaling_in_bacteria                                                                                                                                          |
| fig 6666666.28482.peg.5637 | Contig_8 | 44259 | 41623 | - | hypothetical protein                                                                 | FIG00638284 | ff                                                                                                                                                                          |
| fig 6666666.28482.peg.5638 | Contig_8 | 44659 | 45156 | + | hypothetical protein                                                                 |             |                                                                                                                                                                             |

|                            |           |       |       |   |                                                  |             |                                                                      |
|----------------------------|-----------|-------|-------|---|--------------------------------------------------|-------------|----------------------------------------------------------------------|
| fig 6666666.28482.peg.5639 | Contig_8  | 48365 | 45171 | - | Adenylate cyclase (EC 4.6.1.1)                   | FIG00001294 | idu(25);cAMP_signaling_in_bacteria                                   |
| fig 6666666.28482.peg.5640 | Contig_8  | 49748 | 48531 | - | Transcriptional regulator, IclR family           | FIG00022569 | idu(12);Homogentisate_pathway_of_aromatic_compound_degradation       |
| fig 6666666.28482.peg.5641 | Contig_8  | 50020 | 51615 | + | PPE family protein                               | FIG00013075 | idu(57);CBSS-164757.7.peg.5020                                       |
| fig 6666666.28482.peg.5642 | Contig_8  | 51668 | 52180 | + | hypothetical protein                             | FIG00638284 | ff                                                                   |
| fig 6666666.28482.peg.5643 | Contig_8  | 52191 | 53834 | + | FIG00825842: hypothetical protein                | FIG00825840 | ff                                                                   |
| fig 6666666.28482.peg.5644 | Contig_80 | 27    | 1247  | + | Glycosyl transferase, group 1                    | FIG00018328 | ff                                                                   |
| fig 6666666.28482.peg.5645 | Contig_80 | 1252  | 2301  | + | dTDP-glucose 4,6-dehydratase (EC 4.2.1.46)       |             | idu(4);dTDP-rhamnose_synthesis<br>idu(4);Rhamnose_containing_glycans |
| fig 6666666.28482.peg.5646 | Contig_80 | 2310  | 3950  | + | Carbamoyltransferase family protein              | FIG01030283 | ff                                                                   |
| fig 6666666.28482.peg.5647 | Contig_81 | 42    | 1103  | + | PPE family protein                               | FIG00013075 | icw(1);CBSS-164757.7.peg.5020                                        |
| fig 6666666.28482.peg.5648 | Contig_81 | 1204  | 2313  | + | PPE family protein                               | FIG00013075 | icw(1);CBSS-164757.7.peg.5020                                        |
| fig 6666666.28482.peg.5649 | Contig_81 | 2421  | 2702  | + | putative esat-6 like protein                     |             |                                                                      |
| fig 6666666.28482.peg.5650 | Contig_81 | 2714  | 2998  | + | ESAT-6-like protein EsxL                         | FIG00820465 | ff                                                                   |
| fig 6666666.28482.peg.5651 | Contig_81 | 4426  | 3056  | - | Amine oxidase [flavin-containing] A (EC 1.4.3.4) | FIG01366019 | ff                                                                   |
| fig 6666666.28482.peg.5652 | Contig_81 | 5658  | 4597  | - | response regulator receiver protein              |             |                                                                      |
| fig 6666666.28482.peg.5653 | Contig_81 | 8358  | 5740  | - | hypothetical protein                             | FIG00638284 | ff                                                                   |
| fig 6666666.28482.peg.5654 | Contig_81 | 10809 | 8368  | - | hypothetical protein                             | FIG00638284 | ff                                                                   |
| fig 6666666.28482.peg.5655 | Contig_81 | 11668 | 11111 | - | hypothetical protein                             | FIG00638284 | ff                                                                   |
| fig 6666666.28482.peg.5656 | Contig_81 | 12138 | 11701 | - | protein of unknown function DUF1486              |             |                                                                      |

|                            |           |       |       |   |                                                                                      |             |                                                                                                                        |
|----------------------------|-----------|-------|-------|---|--------------------------------------------------------------------------------------|-------------|------------------------------------------------------------------------------------------------------------------------|
| fig 6666666.28482.peg.5657 | Contig_81 | 13561 | 12149 | - | hypothetical protein                                                                 |             |                                                                                                                        |
| fig 6666666.28482.peg.5658 | Contig_81 | 13781 | 13545 | - | hypothetical protein                                                                 |             |                                                                                                                        |
| fig 6666666.28482.peg.5659 | Contig_81 | 13941 | 13786 | - | hypothetical protein                                                                 |             |                                                                                                                        |
| fig 6666666.28482.peg.5660 | Contig_81 | 13996 | 15369 | + | 2-methylcitrate dehydratase (EC 4.2.1.79)                                            | FIG00001287 | idu(1);Methylcitrate_cycle                                                                                             |
| fig 6666666.28482.peg.5661 | Contig_81 | 15668 | 15450 | - | hypothetical protein                                                                 |             |                                                                                                                        |
| fig 6666666.28482.peg.5662 | Contig_81 | 15779 | 17527 | + | CONSERVED MEMBRANE PROTEIN                                                           | FIG00818075 | ff                                                                                                                     |
| fig 6666666.28482.peg.5663 | Contig_81 | 19850 | 17580 | - | 5-methyltetrahydropteroyl triglutamate--homocysteine methyltransferase (EC 2.1.1.14) | FIG00000683 | ff                                                                                                                     |
| fig 6666666.28482.peg.5664 | Contig_81 | 19839 | 20063 | + | hypothetical protein                                                                 |             |                                                                                                                        |
| fig 6666666.28482.peg.5665 | Contig_81 | 21039 | 20233 | - | Cytochrome P450 143                                                                  |             |                                                                                                                        |
| fig 6666666.28482.peg.5666 | Contig_81 | 21869 | 21213 | - | FIG00824852: hypothetical protein                                                    | FIG00824851 | ff                                                                                                                     |
| fig 6666666.28482.peg.5667 | Contig_81 | 22458 | 21898 | - | Transcriptional regulator, TetR family                                               |             |                                                                                                                        |
| fig 6666666.28482.peg.5668 | Contig_81 | 23572 | 22523 | - | putative oxidoreductase                                                              |             |                                                                                                                        |
| fig 6666666.28482.peg.5669 | Contig_81 | 23750 | 24724 | + | putative transcriptional regulator, AraC family                                      |             |                                                                                                                        |
| fig 6666666.28482.peg.5670 | Contig_81 | 24868 | 26496 | + | Choline dehydrogenase (EC 1.1.99.1)                                                  | FIG00057416 | idu(4);Choline_uptake_and_conversion_to_betaine_clusters<br>idu(4);Choline_and_Betaine_Uptake_and_Betaine_Biosynthesis |
| fig 6666666.28482.peg.5671 | Contig_81 | 26532 | 27719 | + | putative cytochrome P450 hydroxylase                                                 |             | idu(49);Nitric_oxide_synthase                                                                                          |

|                            |           |       |       |   |                                                |             |                                                                                                                                                                                                                  |
|----------------------------|-----------|-------|-------|---|------------------------------------------------|-------------|------------------------------------------------------------------------------------------------------------------------------------------------------------------------------------------------------------------|
| fig 6666666.28482.peg.5672 | Contig_81 | 28579 | 27716 | - | 3-alpha-hydroxysteroid dehydrogenase           | FIG01322334 | ff                                                                                                                                                                                                               |
| fig 6666666.28482.peg.5673 | Contig_81 | 29926 | 28637 | - | Transcriptional regulator, TetR family         | FIG00554417 | ff                                                                                                                                                                                                               |
| fig 6666666.28482.peg.5674 | Contig_81 | 30664 | 30017 | - | FIG00822384: hypothetical protein              | FIG00822379 | ff                                                                                                                                                                                                               |
| fig 6666666.28482.peg.5675 | Contig_81 | 31776 | 30664 | - | Butyryl-CoA dehydrogenase (EC 1.3.99.2)        | FIG00009149 | icw(1);Isoleucine_degradation<br>icw(1);Lysine_fermentation<br>icw(1);Butanol_Biosynthesis<br>icw(1);Acetyl-CoA_fermentation_to_Butyrate<br>icw(1);Valine_degradation<br>icw(1);Anaerobic_respiratory_reductases |
| fig 6666666.28482.peg.5676 | Contig_81 | 32918 | 31773 | - | Butyryl-CoA dehydrogenase (EC 1.3.99.2)        | FIG00009149 | icw(1);Isoleucine_degradation<br>icw(1);Lysine_fermentation<br>icw(1);Butanol_Biosynthesis<br>icw(1);Acetyl-CoA_fermentation_to_Butyrate<br>icw(1);Valine_degradation<br>icw(1);Anaerobic_respiratory_reductases |
| fig 6666666.28482.peg.5677 | Contig_81 | 33188 | 34903 | + | FIG01284085: hypothetical protein              | FIG01284078 | ff                                                                                                                                                                                                               |
| fig 6666666.28482.peg.5678 | Contig_81 | 34929 | 35780 | + | Nitric oxide reductase activation protein NorQ | FIG00133744 | isu;Denitrification                                                                                                                                                                                              |
[truncated: 136,834 more chars]
